# Supplementary material for: Sensory experience controls dendritic structure and behavior by distinct pathways involving degenerins
Source: eLife. 2025 Jan 10;14:e83973. doi: 10.7554/eLife.83973 (PMC11756856; doi:10.7554/eLife.83973)
Supplement: Figure 1—figure supplement 1—source data 1. [file elife-83973-fig1-figsupp1-data1.xlsx]

## Sheet: Fig. 1 Supp. 1
	Panel A
		Crowded	Isolated	isolated with beads
	% responding	82.0513	59.5238	77.4194
	SE proportion	6.14525	7.57403	7.50944
		Fisher's Exact Test
	p-value	0.0309974
	Panel B	Osm-6
		Crowded	Isolated
	% response	29.4118	0
	SE proportion	7.78195	0
		Fisher's Exact Test
		data: table.b
		p-value = 0.001548
	Panel C
		%response	SE proportion
	Crowded DMSO	87.037	4.57051
	cROWDEDAmiloride	88.4615	4.43072
