# Supplementary material for: Sensory experience controls dendritic structure and behavior by distinct pathways involving degenerins
Source: eLife. 2025 Jan 10;14:e83973. doi: 10.7554/eLife.83973 (PMC11756856; doi:10.7554/eLife.83973)
Supplement: Figure 1—source data 1. [file elife-83973-fig1-data1.xlsx]

## Sheet: Fig. 1E
				%Responding to harsh touch
				N2	asic-1	mec-10	degt-1	unc-8	del-1	gtl-1
			crowded worms	84.375	82.7586	39	68	11	61.2903	74
			isolated eggs	40.625	82.6087	35	35	0	55.5556	44
		SE.proportion	crowded worms	6.41779	7.01423	7.92916	7.69573	11.2772	8.74834	8.44152
		SE.proportion	isolated eggs	8.68224	7.90319	8.59326	8.59326	0	9.56304	9.92774
			Fisher exact test, P-value	0.00062833	0.296379	0.629331	0.0141958	N.S.	N.S.	0.04688

## Sheet: Fig. 1C
				%Responding to harsh touch
				N2	mec-4	mec-3
			crowded worms	84.375	78.8462	0
			isolated eggs	40.625	28.2609	0
										Fisher test
									N2	p-value = 0.0006618
									mec-4	p-value=8.81606177393607E-08

## Sheet: Fig. 1G
					%Responding to harsh touch
					Crowded	Isolated 24 hr					Fisher test
				N	25	26					p-value = 0.14
				# responding	19	24
				% responding	76	92.3077

## Sheet: Fig. 1F
			% of responding worms	SE proportion
		WT	83.3333	5.75514
		mec-4	88.2353	7.8244
		him-5	70.5882	7.81411
		him-5;mec-10	37.1429	8.17923
		him-5;mec-10;PVD::MEC-10	75.7576	7.45984
																		him-5 vs. him-5;mec-10
																		Fisher test
																		p-value = 0.007838
																		him-5;mec-10;PVD::MEC-10 (rescue) vs. him-5;mec-10
																			Fisher test
																	p-value = 0.001668

## Sheet: FIG. 1D
				HT chemical stimulation
				Crowded	Isolated
			Average	2.81818	1.71429
			n	33	28
			# responding	27	14
			% responding	81.8182	50
	Fisher test
	p-value = 0.01328
