# Supplementary material for: Sensory experience controls dendritic structure and behavior by distinct pathways involving degenerins
Source: eLife. 2025 Jan 10;14:e83973. doi: 10.7554/eLife.83973 (PMC11756856; doi:10.7554/eLife.83973)
Supplement: Figure 2—figure supplement 1—source data 1. [file elife-83973-fig2-figsupp1-data1.xlsx]

## Sheet: Supp Fig. 2 A+B
									Pf49h12.4::mCherry
				Isolated							Crowded
				ectopic/non ectopic branches	% straight 4yr branches						ectopic/non ectopic branches	% straight 4yr branches
				0.194444	18.1818						0.323529	16
				0.230769	41.1765						0.46875	29.4118
				0.273973	19.5652						0.425532	29.4118
				0.424242	4.7619						0.257143	27.2727
				0.277778	26.087						0.3125	9.09091
				0.342857	9.09091						0.16	9.09091
				0.285714	0						0.155844	26.9231
				0.53125	39.1304						0.25641	36.9565
				0.5	0						0.208955	35.7143
				0.594595	8						0.153846	25
				0.451613	0						0.202899	25
				0.333333	8.69565						0.214286	40
				0.317073	4						0.178571	26.3158
				0.44186	3.84615						0.171429	22.7273
				1.13953	7.40741						0.305556	18.1818
				0.75	0						0.25	9.52381
				0.371429	15						0.128205	29.1667
				0.27907	4.16667						0.0666667	36
				0.193182	25.4902						0.259259	72.2222
				0.666667	10						0.282051	13.6364
			Average	0.429969	12.23					Average	0.239072	26.8823
			Standard error	0.0507894	2.78712					Standard error	0.021824	3.17772
				ectopic/non ectopic branches	Standard error
			Crowded	0.239072	0.021824
			isolated	0.429969	0.0507894								Statistics
														ectopic/non ectopic branches	% straight 4yr branches
													Mann-Whitney U
				% straight 4yr branches	Standard error								P-Value	0.000535358	0.000680055
			Crowded	26.8823	3.17772
			isolated	12.23	2.78712
