# Supplementary material for: Sensory experience controls dendritic structure and behavior by distinct pathways involving degenerins
Source: eLife. 2025 Jan 10;14:e83973. doi: 10.7554/eLife.83973 (PMC11756856; doi:10.7554/eLife.83973)
Supplement: Figure 2—figure supplement 2—source data 1. [file elife-83973-fig2-figsupp2-data1.xlsx]

## Sheet: FIGURE 2 Supp fig. 2
					Chemical stimulation
	ISOLATED								Crowded
		ectopic/non ectopic branches	% straight							ectopic/non ectopic branches	% straight
		0.66	12.1212							0.278689	26.1905
		0.515152	23.2558							0.407407	48.3871
		0.490909	17.9487							0.444444	48
		0.535714	5.55556							0.179487	60
		0.36	5.88235							0.353846	30.7692
		0.708333	7.14286							0.366667	9.52381
		0.483871	10							0.030303	65
		0.470588	4.16667							0.0294118	43.4783
		0.375	47.619							0.206897	16.6667
		0.3	8							0.0666667	27.7778
		0.490566	15.625							0.350877	45.4545
		0.483871	10.5263							0.433333	15
		0.5	12.5							0.302326	61.2903
		0.673913	22.5806							0.22807	33.3333
		0.294118	21.0526							0.111111	53.5714
		0.5625	0							0.155556	33.3333
		0.647059	8.69565							0.156863	37.5
		0.315789	37.5							0.555556	54.5455
		0.193548	26.3158							0.463768	11.1111
		0.411765	15							0.321429	21.6216
		0.217391	10.7143							0.44	13.3333
		0.193548	21.8182							0.0731707	36
										0.285714	38.6364
										0.205882	55
										0.0625	30.4348
										0.134146	53.0612
										0.147727	40.8163
										0.162791	37.7778
										0.107143	15.1515
	ISOLATED								Crowded
	Average	0.449256	15.6373						Average	0.24351	36.6471
	Standard error	0.0328389	2.39511						Standard error	0.0274006	3.00949
		ectopic/non ectopic branches	Standard error
	Crowded	0.24351	0.0274006
	isolated	0.449256	0.0328389
		% straight	Standard error
	Crowded	36.6471	3.00949
	isolated	15.6373	2.39511
																ectopic/non ectopic branches	% straight
															Mann-Whitney U
															p-value	5.99248e-05	1.44746e-05
															a. Grouping Variable: Group
