# Supplementary material for: Sensory experience controls dendritic structure and behavior by distinct pathways involving degenerins
Source: eLife. 2025 Jan 10;14:e83973. doi: 10.7554/eLife.83973 (PMC11756856; doi:10.7554/eLife.83973)
Supplement: Figure 2—figure supplement 3—source data 1. [file elife-83973-fig2-figsupp3-data1.xlsx]

## Sheet: FIGURE 2 Supp Fig. 3
			ISOLATED										CROWDED
					ectopic/non ectopic branches	% straight								ectopic/non ectopic branches	% straight
					0.175676	55.3191								0.114286	14.2857
					0.178082	8.88889								0.0441176	31.1111
					0.25	12.1212								0.0540541	13.0435
					0.146341	35.7143								0.08	60
					0.0759494	11.5385								0	88.8889
					0.132653	21.5385								0.241935	43.5897
					0.272727	17.3913								0.0697674	28.5714
					0.15	23.0769								0.0789474	43.4783
					0.3	17.3913								0.153846	45.4545
					0.213115	15.7895								0.117647	30.4348									Mann-Whitney Test
					0.204545	31.0345								0.244444	20.6897
					0.163265	3.22581								0.166667	20.5882									Statistics
					0.0961538	27.2727								0.424242	15										ectopic/non ectopic branches	% straight
					0.301887	5.71429								0.255814	3.7037									P-value (2-tailed)	0.0176172	0.00667478
					0.2	7.40741								0.0217391	34.6154
					0.354839	17.6471								0.0681818	18.5185
					0.139535	50								0.0958904	38.0952
					0.204545	10.7143								0.0933333	58.1395
					0.575	12								0.267606	42.8571
					0.184211	13.6364									20
					0.340909	10.3448
				Average	0.221878	19.4175							Average	0.136448	33.5533
				Standard error	0.0241622	3.00623							Standard error	0.0245021	4.4798
					ectopic/non ectopic branches	Standard error
				Crowded	0.136448	0.0245021
				isolated	0.221878	0.0241622
					% straight	Standard error
				Crowded	33.5533	4.4798
				isolated	19.4175	3.00623
