# Supplementary material for: Sensory experience controls dendritic structure and behavior by distinct pathways involving degenerins
Source: eLife. 2025 Jan 10;14:e83973. doi: 10.7554/eLife.83973 (PMC11756856; doi:10.7554/eLife.83973)
Supplement: Figure 2—figure supplement 4—source data 1. [file elife-83973-fig2-figsupp4-data1.xlsx]

## Sheet: A,C
						48 hrs Isolation
						CROWDED				ISOLATED
						% straight	ectopic/non ectopic branches			% straight	ectopic/non ectopic branches
						37.5	0.137931			6.89655	0.14
						28	0.139535			12	0.205128
						64.8649	0.144928			51.5152	0.0612245
						40.625	0.106383			29.4118	0.206897
						39.2857	0.0638298			38.0952	0.0789474
						46.4286	0.0204082			55.5556	0.152174
						29.1667	0.0526316			22.2222	0.0465116
						88.8889	0.125			15.7895	0.180328
						21.875	0.04			14.2857	0.105263
						28.5714	0.242424			18.1818	0.238095
						20	0.139535			4.34783	0.147059
						42.8571	0.0967742			26.087	0.117647
						26.1905	0.138462			26.9231	0.104167
						31.8182	0.228571			19.2308	0.097561
						43.75	0.107143			57.1429	0.172414
						27.7778	0			10.5263	0.107143
						61.9048	0.0689655			24.4444	0.169231
						65	0.117647			9.09091	0.108108
						40.9091	0.30303			30.303	0.133333
						51.5152	0.0943396			3.7037	0.159091
						42.8571	0.0333333			50	0.139535
						33.3333	0.151515			53.5714	0.235294
						50	0.233333			27.027	0.224138
						35.7143	0.028169			42.8571	0.342857
						34.0426	0.123288
						63.6364	0.19403
						61.5385	0.0652174
						47.8261	0.0444444
						22.7273	0.388889
						14.2857	0.229508
						41.4297	0.128642			27.0504	0.153006
						3.03872	0.0162931			3.47976	0.0135461
							ectopic/non ectopic branches	Standard error
			Mann-Whitney Test			Crowded	0.128642	0.0162931			Crowded
						Isioated	0.153006	0.0135461			Isolated 24 hr
			Statistics
				ectopic/non ectopic branches	% straight
			P-Value	0.113128	0.00354335

## Sheet: F,G
	Crowded						Isolated
		ectopic/non ectopic branches	% straight					ectopic/non ectopic branches	% straight
		0.206897	42.1053					0.627451	10
		0.265306	31.25					0.519231	8.33333
		0.254902	47.0588					0.341463	10.7143
		0.184211	9.52381					0.609375	18.1818
		0.38	42.8571					0.516667	4.87805
		0.146667	51.2195					0.583333	6.25
		0.179487	39.1304					0.72	20
		0.135135	17.3913					0.408163	24.1379
		0.6	15.3846					0.462687	0
		0.695652	21.4286					0.722222	0
		0.15	0					0.578947	30.5556
		0.227273	20					0.695652	17.6471
		0.440678	11.9048					0.75	0
		0.159091	48.2759					0.363636	27.7778
		0.1	61.7647					0.553191	5.88235
		0.285714	38.8889					0.206897	5.26316
		0.461538	38.8889					0.608696	14.2857
		0.137931	38.8889					0.333333	0
		0.222222	22.2222					0.619048	0
		0.314286	28.5714					0.342857	21.9512
								0.64	5.55556
	Average	0.277349	31.3378					0.533469	11.0197
	Standard error	0.0362543	3.60467					0.0330016	2.13027
		ectopic/non ectopic branches	Standard error
	Crowded	0.277349	0.0362543
	Isolated 24hr	0.533469	0.0330016
		%straight 4ry branches	Standard error
	Crowded	31.3378	3.60467
	Isolated 24hr	11.0197	2.13027
															Mann-Whitney Test
															Test Statisticsa
																ectopic/non ectopic branches	%straight 4ry branches
															P-value	2.38635e-05	0.000122657
