# Supplementary material for: Sensory experience controls dendritic structure and behavior by distinct pathways involving degenerins
Source: eLife. 2025 Jan 10;14:e83973. doi: 10.7554/eLife.83973 (PMC11756856; doi:10.7554/eLife.83973)
Supplement: Figure 2—source data 1. [file elife-83973-fig2-data1.xlsx]

## Sheet: FIG. 2 J+K
	WT ISOLATED				WT crowded
	ectopic/non ectopic branches	%straight 4ry			ectopic/non ectopic branches	%straight 4ry			WT with beads
									ectopic/non ectopic branches	%straight 4ry
	0.246753	6.52174			0.0416667	38.75			0.444444	11.1111
	0.333333	6.25			0.0681818	54.7619			0.340426	13.7771
	0.246377	25			0.164384	23.3696			0.160714	15.098
	0.285714	31.1111			0.0967742	50			0.596154	10
	0.555556	14.2857			0.214286	26.3158			0.159091	3.57143
	0.410256	8			0.16129	75			0.318182	67.8571
	0.08	0			0	32			0.4	21.7391
	0.403846	8.57143			0.176471	31.5789			0.272727	26.087
	0.384615	0			0.230769	30.0905			0.16129	72.2222
	0.463415	4			0.0555556	36			0.5	11.7647
	0.487179	12			0.2	61.9048			0.314815	23.5294
	0.170732	32			0.142857	30.4348			0.636364	37.5
	0.366667	5			0.129032	38.8889			0.307692	50
	0.2	64.1026			0.0512821	24			0.216216	43.0946
	0.28125	11.1111			0.518519	30.7692			0.769231	5.55556
	0.16129	5			0.365854	15.3846			0.272727	46.1538
	0.448276	0			0.0666667	57.6923			0.172414	20
	0.0555556	4			0.0408163	31.8182			0.348837	13.0252
	0.384615	20.5128			0.258065	9.09091			0.351351	0
	0.416667	4.16667			0.114286	36.3636			0.44	20
	1.09091	0			0.0666667	37.037			0.166667	71.8266
	0.5	13.3333			0.193548	38.8889			0.258621	44.8529
	0.648649	20			0.16129	38.8889
	0.466667	17.6471			0.636364	0
	0.695652	7.14286			0.184211	19.0476
	0.761905	5.88235			0.518519	43.75
					0.48	33.3333
					0.307692	30
	0.405611	12.5246			0.201609	34.8271			0.345817	28.5803
	0.0440385	2.72682			0.0311383	2.95136			0.0352893	4.74784
	ectopic/non ectopic branches	Standard error		Crowde vs isolated
Crowded	0.201609	0.0311383		The p-value is	2.94589e-06
Isolated	0.405611	0.0440385
Isolated with beads	0.345817	0.0352893		Crowded vs iaolated with beads
				The p-value is .00132
	% straight 4ry branches	Standard error		Crowde vs isolated
Crowded	34.8271	2.95136		The p-value is	1.98888e-06
Isolated	12.5246	2.72682		Isolated vs iaolated with beads
Isolated with beads	28.5803	4.74784		The p-value is	0.00362233
