# Supplementary material for: Sensory experience controls dendritic structure and behavior by distinct pathways involving degenerins
Source: eLife. 2025 Jan 10;14:e83973. doi: 10.7554/eLife.83973 (PMC11756856; doi:10.7554/eLife.83973)
Supplement: Figure 3—figure supplement 2—source data 1. [file elife-83973-fig3-figsupp2-data1.xlsx]

## Sheet: Figure 3 Supp. Fig 2 Panels E,H
The length of the primary branch was normalized to 100um
								Normalized to 100 um
							Crowded 1% tricaine
							Normalized to 100um of primary branch
								Total ectopic	Total retracted	Total new growth	Total partially retracted	Total growth from existing	Total dynamic retraction	Total dynamic growth		Retracted: full+partial	Growth: new+partial	(growth-retraction)/total ectopic	growth/total ectopic	retraction/total ectopic	Dynamic retraction/total ectopic	dynamic growth/total ectopic	Growth/retraction
							18-12-2018 worm 2, 2hr	3.96729	2.38037	0.264486	1.32243	0	0	0.264486		3.7028	0.264486	-0.866667	0.0666667	0.933333	0	0.0666667	0.0714286
							18-12-2018 worm 1, 3hr	3.93056	2.8962	0	1.03436	0	0.620614	0		3.93056	0	-1	0	1	0.157895	0	0			Growth	Retraction
							28-12-2018 BP709 movie, 3hr	4.89398	3.19173	0.212782	1.27669	0	1.48947	0.212782		4.46842	0.212782	-0.869565	0.0434783	0.913043	0.304348	0.0434783	0.047619							dynamic growth/total ectopic	Dynamic retraction/total ectopic
							30-12-2018 BP709 movie, 3hr	4.18521	2.39155	0	0.797183	0	0.398592	0		3.18873	0	-0.761905	0	0.761905	0.0952381	0	0		Crowded	0.0183575	0.752174		Crowded	0.0183575	0.0929134
							03-01-2019 BP709 worm 3	3.7307	1.86535	0	0.266478	0	0	0		2.13183	0	-0.571429	0	0.571429	0	0	0		Isolated	0.158642	0.546654		Isolated	0.0866735	0.200295
							Crowded 27-12-2018	0.698191	0	0	0.23273	0	0	0		0.23273	0	-0.333333	0	0.333333	0	0	0
																								SE	Crowded	0.01199	0.104611	SE	Crowded	0.01199	0.0499437
							Avg in 100um	3.56765	2.12087	0.0795447	0.821645	0	0.418113	0.0795447		2.94251	0.0795447	-0.733816	0.0183575	0.752174	0.0929134	0.0183575	0.0198413		Isolated	0.0662841	0.0610217		Isolated	0.0223255	0.0835431
							SE	0.597002	0.463748	0.0507493	0.196531	0	0.239002	0.0507493		0.630963	0.0507493	0.0990751	0.01199	0.104611	0.0499437	0.01199	0.0129197
							Isolated 1% tricaine
							Normalized to 100 um of primary branch	TTEST	0.00589885		0.0086487		0.197281
								Total ectopic	Total retracted	Total new growth	Total partially retracted	Total growth from existing	Total dynamic retraction	Total dynamic growth		Retracted: full+partial	Growth: new+partial	(growth-retraction)/total ectopic	growth/total ectopic	retraction/total ectopic	Dynamic retraction/total ectopic	dynamic growth/total ectopic	Growth/retraction
							Worm1, 1% tricaine,18-11-2018	10.325	3.75456	2.81592	1.40796	1.40796	5.16252	1.40796		5.16252	4.22388	-0.0909091	0.409091	0.5	0.5	0.136364	0.818182
							Worm1, 1% tricaine,19-11-2018	9.90239	1.56354	1.56354	2.08471	0	2.08471	1.04236		3.64825	1.56354	-0.210526	0.157895	0.368421	0.210526	0.105263	0.428571
							Worm 1, 22-11-2018, 1% tricaine	6.17068	2.76617	0	1.27669	0.425564	0.638346	0.212782		4.04286	0.425564	-0.586207	0.0689655	0.655172	0.103448	0.0344828	0.105263
							Worm 2, 21-11-2018, 1% tricaine	8.5434	3.20377	1.06792	1.06792	0	1.60189	1.06792		4.2717	1.06792	-0.375	0.125	0.5	0.1875	0.125	0.25
							Worm 1, 02-12-2018, 1% tricaine	16.5528	9.07736	0	2.66981	0.533962	0	0.533962		11.7472	0.533962	-0.677419	0.0322581	0.709677	0	0.0322581	0.0454545
							Avg in 100um	10.2989	4.07308	1.08948	1.70142	0.473497	1.89749	0.852997		5.7745	1.56297	-0.388012	0.158642	0.546654	0.200295	0.0866735	0.329494
							SE	1.72328	1.30203	0.528191	0.25018	0.257641	0.893554	0.212332		1.51369	0.695632	0.110222	0.0662841	0.0610217	0.0835431	0.0223255	0.138908
							Crowded 0.01% tetramisole	Total ectopic	Total retracted	Total new growth	Total partially retracted	Total growth from existing	Total dynamic retraction	Total dynamic growth				(growth-retraction)/total ectopic
							Grouped 1, 11-11-2015	2.95231	0.632638	1.47615	0.421759	0.210879	1.47615	1.26528		1.0544	1.68703	0.214286		Crowded: Growth vs retraction	The p-value is .00512
							Grouped 2, 18-11-2015	3.39148	0.565246	0.376831	0	0.565246	0.565246	0.753662		0.565246	0.942077	0.111111		Isolated: Growth vs retraction	The p-value is .02144
																				Growth: Isolated vs crowded	The p-value is .0226
							Crowded mixture: 0.01% tetramisole+0.1% tricaine	Total ectopic	Total retracted	Total new growth	Total partially retracted	Total growth from existing	Total dynamic retraction	Total dynamic growth
							02-11-2015 grouped movie 3hr, every 5 min picture	2.10879	0.421759	4.21759	0	1.26528	3.37407	1.68703		0.421759	5.48286	2.4
							28-10-2015 grouped movie 2hr, grouped worm 3every 5 min picture	0.982639	0.982639	1.96528	0	0.491319	0.982639	2.4566		0.982639	2.4566	1.5
							Avg in 100um	2.3588	0.65057	2.00896	0.10544	0.63318	1.59953	1.54064		0.75601	2.64214	1.05635
							SE	0.75	0.168437	1.1422	0.149114	0.316918	0.876975	0.509177		0.219283	1.4087	0.77511
																					0.01% tetramisole+1% tricaine
																					Growth	Retraction
																				Crowded	0.5928	0.1717
																				Isolated	0.1673	0.1127

## Sheet: Figure 3 Supp. Fig 2 Panels A,B
		Crowded amiloride										Crowded DMSO
				ectopic/non ectopic branches	% straight 4ry branches									ectopic/non ectopic branches	% straight 4ry branches
				0.229167	16.3636									0.285714	31.5789
				0.304348	13.3333									0.127907	54
				0.176471	47.0588									0.130435	44.7368
				0.12963	25									0.0196078	60
				0.0761905	13.8462									0.145455	9.67742
				0.166667	24.0741									0.272727	21.875
				0.598131	22.4138									0.0813953	48.0769
				0.0421053	43.1034									0.101124	29.7872
				0.202381	14.5833									0.175	22.2222
				0.6875	4.34783									0.223404	47.2727
				0.12987	16.3265									0.0208333	33.3333
				0.243243	25									0.168539	26.7857
				0.244444	27.5862									0.228916	26
				0.114286	25									0.0697674	19.2308
				0.392405	17.3077									0.147368	34.4828
				0.091954	38.7755									0.15493	26.087
				0.164384	27.5									0.115385	0
				0.4	40									0.0909091	32.6923
				0.159091	12									0.209302	44.4444
				0.178571	9.09091									0.103448	22.9167
				0.352941	3.44828									0.108696	50
				0.404762	5.55556									0.0714286	53.125
				0.153846	36.3636									0.1	20.6897
				0.0909091	34.8837
				0.102564	24
				0.318182	19.2308
				0.181818	19.2308
			AVERAGE	0.234661	22.4231								AVERAGE	0.137056	33.0006
			Standard error	0.0300449	2.27518								Standard error	0.0148182	3.15276
											Crowded amiloride vs. crowded DMSO
								ectopic/non ectopic branches	Standard error
							Crowded DMSO	0.137056	0.0148182		The p-value is .01046
							Crowded amiloride	0.234661	0.0300449
								% straight 4ry branches	Standard error		Crowded amiloride vs. crowded DMSO
							Crowded DMSO	33.0006	3.15276		The p-value is .00906
							Crowded amiloride	22.4231	2.27518
