# Supplementary material for: Sensory experience controls dendritic structure and behavior by distinct pathways involving degenerins
Source: eLife. 2025 Jan 10;14:e83973. doi: 10.7554/eLife.83973 (PMC11756856; doi:10.7554/eLife.83973)
Supplement: Figure 3—source data 1. [file elife-83973-fig3-data1.xlsx]

## Sheet: FIG.3 A+B
		Isolated 2hrs											Crowded 2hrs
																												Ranks
			ectopic/non-ectopic branches	% straight									ectopic/non-ectopic branches	% straight														Groupe		N	Mean Rank	Sum of Ranks																	Mann-Whitney Test
			0.333333	44.1176									0.26087	44.4444														Ectopic5Order24HR	Isolated	21	26.8571	564
			0.136986	41.3043									0.1875	51.2821															grouped	20	14.85	297								Ranks									Ranks
			0.25	39.5349									0.0285714	62.5															Total	41										Groupe		N	Mean Rank	Sum of Ranks					Groupe
			0.0357143	57.8947									0.521739	13.4615														TotalEctopic24HR	Isolated	21	28.7143	603								ectopic5order5HR	Isolated	22	23.0682	507.5					SelfAvoidance5hr
			0.275362	26.3158									0.123077	40.5405															grouped	20	12.9	258									grouped	18	17.3611	312.5
			0.446154	30.9524									0	37.5															Total	41											Total	40
			0.53125	31.5789									0.280702	42.4242														Straight24HR	Isolated	21	14	294								TotalEctopic5HR	Isolated	22	22.9545	505					Test Statisticsa
			0.297297	18.1818									0.259259	20.5882															grouped	20	28.35	567									grouped	18	17.5	315
			0.348485	26.6667									0.588235	25															Total	41											Total	40							Mann-Whitney U
			0.232143	31.5789									0.218182	23.3333																										Straigth5HR	Isolated	22	16.5227	363.5					Wilcoxon W
			0.22807	47.5									0.111111	21.0526																											grouped	18	25.3611	456.5					Z
			0.166667	18.1818									0.3	35.8974																											Total	40
			0.0416667	23.0769									0.025641	26.3158																										Curved5HR	Isolated	22	20.2045	444.5
			0.107692	31.7073									0.142857	46.1538																											grouped	18	20.8611	375.5
			0.583333	9.52381									0.466667	10.5263																											Total	40
			0.236111	34.6939									0.148148	18.75																										Wavy5HR	Isolated	22	22.7727	501
			0.169231	32.5									0.304348	33.3333														Test Statisticsa													grouped	18	17.7222	319
			0.0933333	47.7273									0.171875	30.5556																TotalEctopic24HR	Straight24HR										Total	40							Asymp. Sig. (2-tailed)
			0.506329	31.3725									0.138889	20														Mann-Whitney U		48	63																		Exact Sig. [2*(1-tailed Sig.)]
			0.357143	5.26316									0.33871	28.2051														Wilcoxon W		258	294									Test Statisticsa									a. Grouping Variable: Groupe
			0.666667	27.2727									0.15	26.087														Z		-4.22529	-3.84075
			0.254237	20									0.107143	39.4737														Asymp. Sig. (2-tailed)		2.38635e-05	0.000122657
													0.423729	18.4211
													0.275862	47.3684
																																								Mann-Whitney Test
		Average	0.286237	30.7703								Average	0.232213	31.8006																												TotalEctopic5HR	Straigth5HR
		Standard error	0.036971	2.68599								Standard error	0.0314451	2.67295																										Mann-Whitney U		144	110.5
																																								Wilcoxon W		315	363.5
																													Mann-Whitney Test											Z		-1.46813	-2.37992
																																								Asymp. Sig. (2-tailed)		0.142068	0.0173162
																													Ranks											Exact Sig. [2*(1-tailed Sig.)]		.147b	.016b
																													Groupe		N	Mean Rank	Sum of Ranks
		Isolated 5hrs											Crowded 5hrs																SelfAvoidance24hr	Isolated	21	24.5	514.5
			ectopic/non-ectopic branches	% straight									ectopic/non-ectopic branches	% straight																Crowded	19	16.0789	305.5
			1.0625	8.69565									0.193548	35																Total	40
			0.3125	36.3636									0.476923	26.8293
			0.377049	15.7895									0.321429	17.6471															Test Statisticsa
			0.4	13.0435									0.354839	19.0476																SelfAvoidance24hr
			0.62963	43.75									0.383333	24.3243															Mann-Whitney U	115.5
			0.648649	14.8148									0.458333	50															Wilcoxon W	305.5
			0.490909	14.2857		% straight 4ry branches							0.25	27.5															Z	-2.6746
			0.451613	15.7895		The p-value	0.0173162						0.109091	41.9355															Asymp. Sig. (2-tailed)	0.0074819
			0.25	9.52381									0.0714286	35.2941															Exact Sig. [2*(1-tailed Sig.)]	.022b
			0.138889	31.8182									0.333333	31.25															a. Grouping Variable: Groupe
			0.220339	29.7297									0.0588235	35															b. Not corrected for ties.
			0.375	0									0.5625	26.9231
			0.0833333	5.88235									0.344828	27.7778
			0.520833	21.2121									0.277778	28.5714
			0.15942	13.0435									0.0645161	26.3158
			0.139535	14.8148									0.545455	8.69565
			0.607143	18.75									1.08696	5.55556
			0.104478	40.5405									0.025641	26.3158
			0.619048	7.69231									0.142857	46.1538
			0.333333	18.75									0.466667	10.5263
			0.729167	6.89655									0.148148	18.75
			0.730769	14.2857									0.304348	33.3333
			0.102564	13.0435									0.171875	30.5556
			0.461538	2.63158
			0.0857143	50
			0.433333	11.4286
			0.157895	30
		Average	0.393525	18.6139								Average	0.310985	27.5349
		Standard error	0.0475437	2.46794								Standard error	0.0486874	2.2999
		Isolated 15 hrs
			ectopic/non-ectopic branches	% straight							Crowded 15 hrs		ectopic/non-ectopic branches	% straight
			0.362069	14.7059									0.231884	30
			0.377049	5.40541									0.177215	37.2093
			0.37931	15									0.155172	46.875
		Average	0.372809	11.7038								Average	0.188091	38.0281
		Standard error	0.00540979	3.15032								Standard error	0.0228026	4.88857
		Isolated 24 hrs										24 hrs
			ectopic/non-ectopic branches	% straight									ectopic/non-ectopic branches	% straight
			0.627451	10									0.206897	42.1053
			0.519231	8.33333									0.265306	31.25
			0.341463	10.7143									0.254902	47.0588
			0.609375	18.1818									0.184211	9.52381
			0.516667	4.87805									0.38	42.8571
			0.583333	6.25									0.146667	51.2195
			0.72	20		ectopic/non-ectopic branches	% straight 4ry branches						0.179487	39.1304
			0.408163	24.1379	The p-value	2.38635e-05	0.000122657						0.135135	17.3913
			0.462687	0									0.6	15.3846
			0.722222	0									0.695652	21.4286
			0.578947	30.5556									0.15	0
			0.695652	17.6471									0.227273	20
			0.75	0									0.440678	11.9048
			0.363636	27.7778									0.159091	48.2759
			0.553191	5.88235									0.1	61.7647
			0.206897	5.26316									0.285714	38.8889
			0.608696	14.2857									0.461538	38.8889
			0.333333	0									0.137931	38.8889
			0.619048	0									0.222222	22.2222
			0.342857	21.9512									0.314286	28.5714
			0.64	5.55556
												Average	0.281058	30.771
		Average	0.533469	11.0197								Standard error	0.0362543	3.60467
		Standard error	0.0342401	2.22109
[truncated: 4 more columns]

## Sheet: FIG. 3 C+D+E
	Geometry of quaternary branches										Non-ectopic								Ectopic											Dynamics
	Geometry of quaternary branches					Geometry of quaternary branches					Non-ectopic				Non-ectopic				Crowded						Isolated for 4-5 hrs					After 4-5 hr isolation						After 4-5 hr isolation					Self avoidance defects
		Time 0			% straight	Time 0	Time 4-5 hrs			% straight	Time 0			Sum	Time 4-5 hrs			Sum		# Ectopic time 0				Total ectopic	# Ectopic 4-5 hrs				Total ectopic	Ectopic fully retracted				Total retracted		New ectopic that apear				Total new ectopic growth	Gaps time 0	No gap time 0	% SA time 0	Gaps time 4-5 hrs	No gap time 4-5 hrs	% SA time 4-5 hrs
	Total quaternary branches	straight	curved	wavy		Total quaternary branches	straight	curved	wavy		2	3	4		2	3	4		Order	2	3	4	5		2	3	4	5		2	3	4	5			2	3	4	5
	34	18	14	2	52.9412	28	7	11	10	25	8	18	34	60	6	12	28	46	# of branches	6	1	2	13	22	3	0	3	16	22	2	1	1	7	11		0	0	2	14	16	7	0	0	5	0	0
	46	11	13	22	23.913	43	5	10	28	11.6279	12	24	47	83	12	22	43	77		1	0	4	13	18	2	2	8	12	24	1	0	1	6	8		1	1	4	5	11	10	0	0	11	0	0
	26	5	16	4	19.2308	26	1	8	17	3.84615	5	9	26	40	5	8	26	39		5	1	0	3	9	5	2	1	9	17	3	0	0	2	5		4	2	1	7	14	5	0	0	4	0	0
	29	14	12	3	48.2759	25	6	12	7	24	7	14	33	54	6	12	26	44		3	3	0	5	11	3	3	1	5	12	0	0	0	1	1		0	3	1	1	5	7	0	0	6	0	0
	47	17	15	15	36.1702	42	7	13	22	16.6667	6	12	47	65	8	15	42	65		3	0	1	13	17	4	0	4	15	23	2	0	0	3	5		1	0	3	3	7	6	0	0	7	0	0
	30	16	10	4	53.3333	24	5	8	11	20.8333	8	15	30	53	8	15	24	47		0	1	0	6	7	0	2	1	8	11	0	1	0	4	5		0	2	1	6	9	7	0	0	7	0	0
				Avg	38.9774				Avg	16.9957									Avg	3	1	1.16667	8.83333	14	2.83333	1.5	3	10.8333	18.1667	1.33333	0.333333	0.333333	3.83333	5.83333	Avg	1	1.33333	2	6	10.3333			0	6.66667		0
				SE	6.08902				SE	3.31506																							SE	1.37639						1.7062			0	0.988826		0
				ttest	0.000911514
						Avg	SE
					Crowded	38.9774	6.08902												Ectopic/non ectopic														ttesp paired dynamics	0.00618015
					Isolated 4 hr	16.9957	3.31506																	Time 0					Isolated 4 hr
																								0.366667					0.478261
																								0.216867					0.311688
																								0.225					0.435897
																								0.203704					0.272727
																								0.261538					0.353846
																								0.132075					0.234043
																							Avg	0.234309				Avg	0.347744
																							SE	0.0316435				SE	0.0385999
																							ttest	0.00254858
																							ectopic/non ectopic
																						Crowded	0.234309
																						Isolated 4 hr	0.347744					full retraction	new growth
																											Avg	5.83333	10.3333
																											SE	1.37639	1.7062
																								SE
																								0.0316435
																								0.0385999
					Statistics		The p-values
				# branches retraction vs growth			0.0272812
				ectopic/non-ectopic branches			0.0277078
				# straight 4ry branches			0.0431144

## Sheet: fig. 3 F
					SE	#REF!					Average	#REF!										SE	#REF!
											SE	#REF!
											% retracted	#REF!
	Time frame	1	2	3	4	5	6	7	8	9	10	11	12	13	14	15	16	17	18	19	20	21	22	23	24	25	26	27	28	29	31	32	33	34	35	36	37
	Time (minutes)	0	5	10	15	20	25	30	35	40	45	50	55	60	65	70	75	80	85	90	95	100	105	110	115	120	125	130	135	140	145	150	155	160	165	170	175		Last time point
	Crowded 27-12-2018	30.7692	30.7692	30.7692	30.7692	30.7692	30.7692	32	30.7692	30.7692	30.7692		32	30.7692	30.7692	30.7692	30.7692	26.9231	26.9231	26.9231	26.9231	26.9231	26.9231	26.9231	28	24	24	24	24	24	24	24	24	24	24	24	24		24
	18-12-2018 worm 2, 2hr	38.6364	38.4615	36.3636			30.7692	30.7692	32.5	41.0256			35	38.0952	38.0952	39.5349	34.2105	31.7073	22.5	33.3333	37.5	40	35.7143	29.4118	25	9.52381													9.52381
	18-12-2018 worm 1, 3hr	39.2157	30	34.2105	39.2157	39.2157	39.2157	39.2157	37.7778	37.7778	37.7778	37.7778	45.1613	45.1613	45.1613	40	42.8571	42.8571	42.8571	42.8571	41.9355	41.9355	48.1481	44.4444	45.8333	45.8333	30	20	20	20	15.5556	15.5556	11.1111	11.1111	11.1111	10.4167	10.2041		10.2041
	28-12-2018 BP709 movie, 3hr	33.3333	33.3333	33.3333	33.3333	33.3333	33.3333	33.3333	36.1111	33.3333	33.3333	33.3333	33.3333	34.1463	34.1463	31.7073	31.7073	29.2683	26.8293	24.3902	24.3902	27.027	19.4444	19.4444	20	17.1429	17.1429	17.1429	17.1429	17.1429									17.1429
	30-12-2018 BP709 movie, 3hr	16.2791	16.2791	15.7895		16.2791	12.9032	16.2791	16.2791	16.2791	16.2791	16.2791	16.2791	16.6667	16.6667	16.6667	16.6667	14.2857	14.2857	7.14286	7.31707	7.31707	7.31707	6.97674	7.14286	2.38095	5.26316	5.88235	3.22581	4.34783									4.34783
% Straight 4ry branches	Avg crowded	31.6467	29.7686	30.0932	34.4394	29.8993	29.3981	30.3195	30.6874	31.837	29.5399	29.1301	32.3547	32.9678	32.9678	31.7356	31.2422	29.0083	26.679	26.9293	27.6132	28.6405	27.5094	25.4401	25.1952	19.7762	19.1015	16.7563	16.0922	16.3727	19.7778	19.7778	17.5556	17.5556	17.5556	17.2083	17.102
% Straight 4ry branches	Avg isolated	5.48309	5.48309	5.53071	5.53071	4.21785	5.53071	5.53071	5.53071	5.48309	4.21785	5.48309	4.53071	4.53071	4.63598	4.63598	4.63598	4.63598	3.58334	3.58334	3.16339	3.16339	3.16339	3.16339	3.16339	3.16339	6.32678	6.32678	6.32678	6.32678	6.32678	6.32678	6.32678	8.10811	8.10811	8.10811	8.10811	8.10811	0.0146969
	SE crowded	4.15887	3.68305	3.68662	2.50021	4.87216	4.40291	3.79727	3.81171	4.27289	4.65129	6.55233	4.63959	4.72716	4.72716	4.22573	4.22258	4.58391	4.65227	5.88497	6.02359	6.18885	6.95124	6.1481	6.27182	7.45471	5.30808	3.88785	4.51343	4.24778	4.22222	4.22222	6.44444	6.44444	6.44444	6.79167	6.89796
	Isolated straight
	Avg	5.48309	5.48309	5.53071	5.53071	4.21785	5.53071	5.53071	5.53071	5.48309	4.21785	5.48309	4.53071	4.53071	4.63598	4.63598	4.63598	4.63598	3.58334	3.58334	3.16339	3.16339	3.16339	3.16339	3.16339	3.16339	6.32678	6.32678	6.32678	6.32678	6.32678	6.32678	6.32678	6.32678	6.32678	6.32678	6.32678	6.32678
	SE	1.71401	1.71401	1.70966	1.70966	2.34633	1.70966	1.70966	1.70966	1.71401	2.34633	1.71401	2.04653	2.04653	2.11831	2.11831	2.11831	2.11831	1.57958	1.57958	1.96584	1.96584	1.96584	1.96584	1.96584	1.96584	1.78133	1.78133	1.78133	1.78133	1.78133	1.78133	1.78133	1.78133	1.78133	1.78133	1.78133	1.78133
						0
		Isolated	Time frame	1	2	3	4	5	6	7	8	9	10	11	12	13	14	15	16	17	18	19	20	21	22	23	24	25	26	27	28	29	30	31	32	33	34	35	36	37
			Time (minutes)	0	5	10	15	20	25	30	35	40	45	50	55	60	65	70	75	80	85	90	95	100	105	110	115	120	125	130	135	140	145	150	155	160	165	170	175	180
			Worm1, 1% tricaine,18-11-2018	10	10	10	10		10	10	10	10		10	10	10	10.5263	10.5263	10.5263	10.5263	5.26316	5.26316	0	0	0	0	0	0
			Worm1, 1% tricaine,19-11-2018	4.7619	4.7619	5	5		5	5	5	4.7619		4.7619	0	0	0	0	0	0	0	0		0	0	0	0	0
			Worm 1, 22-11-2018, 1% tricaine	8.10811	8.10811	8.10811	8.10811	8.10811	8.10811	8.10811	8.10811	8.10811	8.10811	8.10811	8.10811	8.10811	8.10811	8.10811	8.10811	8.10811	8.10811	8.10811	8.10811	8.10811	8.10811	8.10811	8.10811	8.10811	8.10811	8.10811	8.10811	8.10811	8.10811	8.10811	8.10811	8.10811	8.10811	8.10811	8.10811	8.10811
			Worm 2, 21-11-2018, 1% tricaine	4.54545	4.54545	4.54545	4.54545	4.54545	4.54545	4.54545	4.54545	4.54545	4.54545	4.54545	4.54545	4.54545	4.54545	4.54545	4.54545	4.54545	4.54545	4.54545	4.54545	4.54545	4.54545	4.54545	4.54545	4.54545	4.54545	4.54545	4.54545	4.54545	4.54545	4.54545	4.54545	4.54545	4.54545	4.54545	4.54545	4.54545
			Worm 1, 02-12-2018, 1% tricain	0	0	0	0	0	0	0	0	0	0	0	0	0	0	0	0	0	0	0	0
			Avg	5.48309	5.48309	5.53071	5.53071	4.21785	5.53071	5.53071	5.53071	5.48309	4.21785	5.48309	4.53071	4.53071	4.63598	4.63598	4.63598	4.63598	3.58334	3.58334	3.16339	3.16339	3.16339	3.16339	3.16339	3.16339	6.32678	6.32678	6.32678	6.32678	6.32678	6.32678	6.32678	6.32678	6.32678	6.32678	6.32678	6.32678
			SE	1.71401	1.71401	1.70966	1.70966	2.34633	1.70966	1.70966	1.70966	1.71401	2.34633	1.71401	2.04653	2.04653	2.11831	2.11831	2.11831	2.11831	1.57958	1.57958	1.96584	1.96584	1.96584	1.96584	1.96584	1.96584	1.78133	1.78133	1.78133	1.78133	1.78133	1.78133	1.78133	1.78133	1.78133	1.78133	1.78133	1.78133
