# Supplementary material for: Sensory experience controls dendritic structure and behavior by distinct pathways involving degenerins
Source: eLife. 2025 Jan 10;14:e83973. doi: 10.7554/eLife.83973 (PMC11756856; doi:10.7554/eLife.83973)
Supplement: Figure 4—figure supplement 1—source data 1. [file elife-83973-fig4-figsupp1-data1.xlsx]

## Sheet: Figure 4 Fig supp. 1
			%Response
			N2	asic-1	mec-10	degt-1	asic-1;mec-10	mec-10;degt-1	asic-1;degt-1	asic-1;mec-10;degt-1
	% of responding worms	Crowded	84.375	82.7586	39	68	92.3077	37.5	85.7143	29
		Isolated	40.625	82.6087	35	35	87.5	25	79.4118	44
		Fisher exact test, P-value	0.00062833	0.296379	0.629331	0.0141958	0.711872	0.324154	0.540091	0.522787
												8
															mec-10		asic-1;mec-10					asic-1;mec-10
															crowded	isolated	crowded	isolated			isolated	crowded	isolated
															15	28	20	22			17.3333	14.3333	11.3333
															23	2	1	2			1.66667	1.66667	1.66667
																N2	asic-1	mec-10	degt-1	asic-1;mec-10	mec-10;degt-1	asic-1;degt-1	asic-1;mec-10;degt-1
																84.375	82.7586	39	68	92.3077	37.5	85.7143	28.8462
																40.625	82.6087	35	35	87.5	25	79.4118	44
		Fisher's Exact Test for Count Data														6.41779	7.01423	7.92916	7.69573	4.26634	7.65466	5.91559	6.28288
																8.68224	7.90319	8.59326	8.59326	5.22913	7.21688	6.93468	7.01997
	WT-K vs. mec-10 crowded	data: m				WT-K vs. asic-1 isolated
		p-value = 6.921e-05					Fisher's Exact Test for Count Data
		alternative hypothesis: true odds ratio is not equal to 1
		95 percent confidence interval:					data: m
		2.452317 25.330487					p-value = 0.002129
		sample estimates:					alternative hypothesis: true odds ratio is not equal to 1
		odds ratio					95 percent confidence interval:
		7.44389					0.00952198 0.50763872
							sample estimates:
		> b<-c(17,13,11,20)					odds ratio
		> n<-matrix(b,2,2)					0.0971575
		> fisher.test(n)
		Fisher's Exact Test for Count Data				WT-K vs. asic-1;mec-10 isolated
							Fisher's Exact Test for Count Data
	isolated	data: n
		p-value = 0.1261					data: m
		alternative hypothesis: true odds ratio is not equal to 1					p-value = 0.005642
		95 percent confidence interval:					alternative hypothesis: true odds ratio is not equal to 1
		0.7555396 7.5750705					95 percent confidence interval:
		sample estimates:					0.01194278 0.65734769
		odds ratio					sample estimates:
		2.34306					odds ratio
							0.123453
