# Supplementary material for: Sensory experience controls dendritic structure and behavior by distinct pathways involving degenerins
Source: eLife. 2025 Jan 10;14:e83973. doi: 10.7554/eLife.83973 (PMC11756856; doi:10.7554/eLife.83973)
Supplement: Figure 4—figure supplement 2—source data 1. [file elife-83973-fig4-figsupp2-data1.xlsx]

## Sheet: Figure 4  Fig. Supp. 2
	Raw data
Full name	group	ectopic/non-ectopic branches	% straight
N2 Isolated	Wild type Isolated	0.24675	6.52
N2 Isolated	Wild type Isolated	0.33333	6.25				p-value
N2 Isolated	Wild type Isolated	0.24638	25			Within genotype	ectopic/non-ectopic branches	% straight 4ry branches
N2 Isolated	Wild type Isolated	0.28571	31.11			N2/WILD TYPE: Isoltaed vs. crowded	0.000517706	1.98798e-06
N2 Isolated	Wild type Isolated	0.55556	14.29			asic-1: Isoltaed vs. crowded	0.000198776	0.0766801
N2 Isolated	Wild type Isolated	0.41026	8			mec-10: Isoltaed vs. crowded	0.00299555	0.000187212
N2 Isolated	Wild type Isolated	0.08	0			degt-1: Isoltaed vs. crowded	0.255101	0.00819343
N2 Isolated	Wild type Isolated	0.40385	8.57			asic-1;mec-10: Isoltaed vs. crowded	2.0799e-05	8.29016e-08
N2 Isolated	Wild type Isolated	0.38462	0			mec-10;degt-1: Isoltaed vs. crowded	0.315336	0.483155
N2 Isolated	Wild type Isolated	0.46341	4			asic-1;degt-1: Isoltaed vs. crowded	0.0238601	0.0141339
N2 Isolated	Wild type Isolated	0.48718	12			asic-1;mec-10;degt-1: Isoltaed vs. crowded	0.655267	0.00640273
N2 Isolated	Wild type Isolated	0.17073	32
N2 Isolated	Wild type Isolated	0.36667	5
N2 Isolated	Wild type Isolated	0.2	64.1
N2 Isolated	Wild type Isolated	0.28125	11.11			Crowded WT vs. Crowded mec-10	0.00120902	0.000128935
N2 Isolated	Wild type Isolated	0.16129	5			Crowded WT vs. Crowded degt-1	1.04976e-07	4.18052e-05
N2 Isolated	Wild type Isolated	0.44828	0
N2 Isolated	Wild type Isolated	0.05556	4
N2 Isolated	Wild type Isolated	0.38462	20.51
N2 Isolated	Wild type Isolated	0.41667	4.17
N2 Isolated	Wild type Isolated	1.09091	0
N2 Isolated	Wild type Isolated	0.5	13.33
N2 Isolated	Wild type Isolated	0.64865	20
N2 Isolated	Wild type Isolated	0.46667	17.65
N2 Isolated	Wild type Isolated	0.69565	7.14
N2 Isolated	Wild type Isolated	0.7619	5.88
N2 Crowded	Wild type Crowded	0.0417	38.75
N2 Crowded	G.WT	0.0682	54.76
N2 Crowded	G.WT	0.1644	23.37
N2 Crowded	G.WT	0.0968	50
N2 Crowded	G.WT	0.2143	26.32
N2 Crowded	G.WT	0.1613	75
N2 Crowded	G.WT	0	32
N2 Crowded	G.WT	0.1765	31.58
N2 Crowded	G.WT	0.2308	30.09
N2 Crowded	G.WT	0.0556	36
N2 Crowded	G.WT	0.2	61.9
N2 Crowded	G.WT	0.1429	30.43
N2 Crowded	G.WT	0.129	38.89
N2 Crowded	G.WT	0.0513	24
N2 Crowded	G.WT	0.5185	30.77
N2 Crowded	G.WT	0.3659	15.38
N2 Crowded	G.WT	0.0667	57.69
N2 Crowded	G.WT	0.0408	31.82
N2 Crowded	G.WT	0.2581	9.09
N2 Crowded	G.WT	0.1143	36.36
N2 Crowded	G.WT	0.0667	37.04
N2 Crowded	G.WT	0.1935	38.89
N2 Crowded	G.WT	0.1613	38.89
N2 Crowded	G.WT	0.6364	0
N2 Crowded	G.WT	0.1842	19.05
N2 Crowded	G.WT	0.5185	43.75
N2 Crowded	G.WT	0.48	33.33
N2 Crowded	G.WT	0.3077	30
Isolated mec-10	I.10M	0.8621	37.5
Isolated mec-10	I.10M	0.6154	22.22
Isolated mec-10	I.10M	0.2982	8.82
Isolated mec-10	I.10M	0.1833	18.42
Isolated mec-10	I.10M	0.4286	13.33
Isolated mec-10	I.10M	0.4146	0
Isolated mec-10	I.10M	0.3333	8.7
Isolated mec-10	I.10M	0.5238	7.14
Isolated mec-10	I.10M	0.338	14.89
Isolated mec-10	I.10M	0.3939	8.33
Isolated mec-10	I.10M	0.4231	6.25
Isolated mec-10	I.10M	0.3667	0
Isolated mec-10	I.10M	0.2738	18
Isolated mec-10	I.10M	0.5714	6.06
Isolated mec-10	I.10M	0.5122	3.57
Isolated mec-10	I.10M	0.2537	25.64
Isolated mec-10	I.10M	0.2778	12.9
Isolated mec-10	I.10M	0.5294	20.45
Isolated mec-10	I.10M	0.4324	0
Isolated mec-10	I.10M	0.4286	4
Isolated mec-10	I.10M	0.92	0
Isolated mec-10	I.10M	0.8409	0
Isolated mec-10	I.10M	0.5238	12.5
Isolated mec-10	I.10M	0.7368	2.78
Crowded mec-10	G.10M	0.2157	24
Crowded mec-10	G.10M	0.2857	13.51
Crowded mec-10	G.10M	0.2344	16.28
Crowded mec-10	G.10M	0.2632	7.89
Crowded mec-10	G.10M	0.2059	15
Crowded mec-10	G.10M	0.3846	22.22
Crowded mec-10	G.10M	0.4583	12.5
Crowded mec-10	G.10M	0.3824	11.63
Crowded mec-10	G.10M	0.5357	11.11
Crowded mec-10	G.10M	0.3875	30.61
Crowded mec-10	G.10M	0.1461	32
Crowded mec-10	G.10M	0.209	21.05
Crowded mec-10	G.10M	0.4783	14.63
Crowded mec-10	G.10M	0.4615	32.5
Crowded mec-10	G.10M	0.1642	6.98
Crowded mec-10	G.10M	0.359	22.73
Crowded mec-10	G.10M	0.4545	8.82
Crowded mec-10	G.10M	0.3088	24.39
Crowded mec-10	G.10M	0.3231	23.68
Crowded mec-10	G.10M	0.1519	32
Crowded mec-10	G.10M	0.4265	30
Crowded mec-10	G.10M	0.303	34.21
Crowded mec-10	G.10M	0.0625	29.41
Crowded mec-10	G.10M	1.0556	7.69
Crowded mec-10	G.10M	0.3091	32.35
Crowded mec-10	G.10M	0.1884	30.23
Crowded mec-10	G.10M	0.2836	32.56
Crowded mec-10	G.10M	0.4035	16.67
Crowded mec-10	G.10M	0.3333	13.64
Crowded mec-10	G.10M	0.1688	20.93
Isolated degt-1	I.DEGT	0.3188	6.38
Isolated degt-1	I.DEGT	0.2308	12.5
Isolated degt-1	I.DEGT	0.2727	27.27
Isolated degt-1	I.DEGT	0.3115	12.24
Isolated degt-1	I.DEGT	0.3288	12
Isolated degt-1	I.DEGT	0.5075	8.7
Isolated degt-1	I.DEGT	0.6316	0
Isolated degt-1	I.DEGT	0.7069	7.5
Isolated degt-1	I.DEGT	0.375	0
Isolated degt-1	I.DEGT	0.5932	5.26
Isolated degt-1	I.DEGT	0.5778	3.23
Isolated degt-1	I.DEGT	0.8772	0
Isolated degt-1	I.DEGT	0.3846	6.12
Isolated degt-1	I.DEGT	0.25	45
Isolated degt-1	I.DEGT	0.3494	24
Isolated degt-1	I.DEGT	0.35	15.79
Isolated degt-1	I.DEGT	0.4103	7.41
Isolated degt-1	I.DEGT	0.5435	0
Isolated degt-1	I.DEGT	0.45	4.35
Isolated degt-1	I.DEGT	0.6429	21.05
Isolated degt-1	I.DEGT	0.7037	19.51
Isolated degt-1	I.DEGT	0.5538	23.81
Isolated degt-1	I.DEGT	0.5238	13.51
Isolated degt-1	I.DEGT	0.5278	7.14
Croded degt-1	G.DEGT	0.3148	47.06
Croded degt-1	G.DEGT	0.5738	17.5
Croded degt-1	G.DEGT	0.7358	5.41
Croded degt-1	G.DEGT	0.4177	24.07
Croded degt-1	G.DEGT	0.6038	8.11
Croded degt-1	G.DEGT	0.8545	2.78
Croded degt-1	G.DEGT	0.6613	7.5
Croded degt-1	G.DEGT	0.7843	26.47
Croded degt-1	G.DEGT	0.5192	13.16
Croded degt-1	G.DEGT	0.4154	17.07
Croded degt-1	G.DEGT	0.2564	18.18
Croded degt-1	G.DEGT	0.5818	22.86
Croded degt-1	G.DEGT	0.8667	16.67
Croded degt-1	G.DEGT	0.4426	10.53
Croded degt-1	G.DEGT	0.3333	10.53
Croded degt-1	G.DEGT	0.7541	8.82
Croded degt-1	G.DEGT	0.2754	15.56
Croded degt-1	G.DEGT	0.3103	5
Croded degt-1	G.DEGT	0.2581	10
Croded degt-1	G.DEGT	0.4262	14.71
Croded degt-1	G.DEGT	0.5441	24.39
Croded degt-1	G.DEGT	0.3889	29.55
Croded degt-1	G.DEGT	0.8689	19.51
Croded degt-1	G.DEGT	0.6981	30.56
Croded degt-1	G.DEGT	0.4032	35.14
Croded degt-1	G.DEGT	0.5714	30
Croded degt-1	G.DEGT	0.6452	35.14
Croded degt-1	G.DEGT	0.5091	26.32
Isolated mec-10;degt-1	I.M10D1	0.1765	16.67
Isolated mec-10;degt-1	I.M10D1	0.3913	14.29
Isolated mec-10;degt-1	I.M10D1	0.1758	45.61
Isolated mec-10;degt-1	I.M10D1	0.3492	26.32
Isolated mec-10;degt-1	I.M10D1	0.2571	17.39
Isolated mec-10;degt-1	I.M10D1	0.3506	13.04
Isolated mec-10;degt-1	I.M10D1	0.2436	44
Isolated mec-10;degt-1	I.M10D1	0.1667	57.89
Isolated mec-10;degt-1	I.M10D1	0.2769	40
Isolated mec-10;degt-1	I.M10D1	0.1084	42
Isolated mec-10;degt-1	I.M10D1	0.2381	39.53
Isolated mec-10;degt-1	I.M10D1	0.1905	49.02
Isolated mec-10;degt-1	I.M10D1	0.2179	28.57
Isolated mec-10;degt-1	I.M10D1	0.3857	40
Isolated mec-10;degt-1	I.M10D1	0.1957	62.5
Isolated mec-10;degt-1	I.M10D1	0.4154	38.64
Isolated mec-10;degt-1	I.M10D1	0.44	31.91
Isolated mec-10;degt-1	I.M10D1	0.2289	31.91
Isolated mec-10;degt-1	I.M10D1	0.4054	40.91
Isolated mec-10;degt-1	I.M10D1	0.3171	29.09
Isolated mec-10;degt-1	I.M10D1	0.25	11.54
Isolated mec-10;degt-1	I.M10D1	0.6066	18.6
Isolated mec-10;degt-1	I.M10D1	0.2542	51.35
Isolated mec-10;degt-1	I.M10D1	0.0893	23.53
Isolated mec-10;degt-1	I.M10D1	0.3929	20
Isolated mec-10;degt-1	I.M10D1	0.3649	27.27
Isolated mec-10;degt-1	I.M10D1	0.2154	32.61
Isolated mec-10;degt-1	I.M10D1	0.1842	50
Crowded mec-10;degt-1	G.M10D1	0.5542	33.33
Crowded mec-10;degt-1	G.M10D1	0.5647	22.81
Crowded mec-10;degt-1	G.M10D1	0.2564	38
Crowded mec-10;degt-1	G.M10D1	0.3514	21.57
Crowded mec-10;degt-1	G.M10D1	0.0851	59.65
Crowded mec-10;degt-1	G.M10D1	0.1467	41.86
Crowded mec-10;degt-1	G.M10D1	0.2174	26.67
Crowded mec-10;degt-1	G.M10D1	0.2121	46.34
Crowded mec-10;degt-1	G.M10D1	0.4615	38.64
Crowded mec-10;degt-1	G.M10D1	0.1364	40.43
Crowded mec-10;degt-1	G.M10D1	0.3714	31.82
Crowded mec-10;degt-1	G.M10D1	0.4268	54.17
Crowded mec-10;degt-1	G.M10D1	0.0526	39.13
Crowded mec-10;degt-1	G.M10D1	0.2297	40.43
Crowded mec-10;degt-1	G.M10D1	0.3333	40.91
Crowded mec-10;degt-1	G.M10D1	0.3974	41.82
Crowded mec-10;degt-1	G.M10D1	0.1928	58.33
Crowded mec-10;degt-1	G.M10D1	0.6418	35.56
Crowded mec-10;degt-1	G.M10D1	0.209	31.71
Crowded mec-10;degt-1	G.M10D1	0.3378	38.64
Crowded mec-10;degt-1	G.M10D1	0.3548	39.02
Crowded mec-10;degt-1	G.M10D1	0.3934	24.39
Crowded mec-10;degt-1	G.M10D1	0.5385	17.5
Crowded mec-10;degt-1	G.M10D1	0.2535	29.55
Crowded mec-10;degt-1	G.M10D1	0.3088	47.73
Crowded mec-10;degt-1	G.M10D1	0.3906	12.5
Isolated asic-1;degt-1	I.A1D1	0.5195	19.23
Isolated asic-1;degt-1	I.A1D1	0.3472	12
Isolated asic-1;degt-1	I.A1D1	0.4242	27.27
Isolated asic-1;degt-1	I.A1D1	0.8226	13.64
Isolated asic-1;degt-1	I.A1D1	0.5493	10
Isolated asic-1;degt-1	I.A1D1	0.3939	0
Isolated asic-1;degt-1	I.A1D1	0.5556	3.33
Isolated asic-1;degt-1	I.A1D1	0.2222	17.39
Isolated asic-1;degt-1	I.A1D1	0.6615	7.32
Isolated asic-1;degt-1	I.A1D1	0.3924	19.23
Isolated asic-1;degt-1	I.A1D1	0.3226	50
Isolated asic-1;degt-1	I.A1D1	0.25	11.54
Isolated asic-1;degt-1	I.A1D1	0.7576	13.64
Isolated asic-1;degt-1	I.A1D1	0.549	35.71
Isolated asic-1;degt-1	I.A1D1	0.2687	39.58
Isolated asic-1;degt-1	I.A1D1	0.4429	6.38
Isolated asic-1;degt-1	I.A1D1	0.1667	13.64
Isolated asic-1;degt-1	I.A1D1	0.641	9.09
Isolated asic-1;degt-1	I.A1D1	0.4167	44.44
Isolated asic-1;degt-1	I.A1D1	0.2235	28.85
Isolated asic-1;degt-1	I.A1D1	0.1463	33.33
Isolated asic-1;degt-1	I.A1D1	0.7945	6.52
crowded asic-1;degt-1	G.A1D1	0.3269	25
crowded asic-1;degt-1	G.A1D1	0.3279	33.33
crowded asic-1;degt-1	G.A1D1	0.2131	17.95
crowded asic-1;degt-1	G.A1D1	0.2679	30.3
crowded asic-1;degt-1	G.A1D1	0.322	30.77
crowded asic-1;degt-1	G.A1D1	0.3284	28.89
crowded asic-1;degt-1	G.A1D1	0.2464	43.59
crowded asic-1;degt-1	G.A1D1	0.3333	23.81
crowded asic-1;degt-1	G.A1D1	0.2817	34.88
crowded asic-1;degt-1	G.A1D1	0.3793	39.02
crowded asic-1;degt-1	G.A1D1	0.0909	17.39
crowded asic-1;degt-1	G.A1D1	0.5	31.25
crowded asic-1;degt-1	G.A1D1	0.383	37.5
crowded asic-1;degt-1	G.A1D1	0.3385	27.27
crowded asic-1;degt-1	G.A1D1	0.2113	39.02
crowded asic-1;degt-1	G.A1D1	0.4333	23.81
crowded asic-1;degt-1	G.A1D1	0.2754	30.23
crowded asic-1;degt-1	G.A1D1	0.4561	39.02
crowded asic-1;degt-1	G.A1D1	0.0625	13.64
crowded asic-1;degt-1	G.A1D1	0.3	25
crowded asic-1;degt-1	G.A1D1	0.2273	40.74
crowded asic-1;degt-1	G.A1D1	0.5556	7.14
crowded asic-1;degt-1	G.A1D1	0.3333	12.5
Isolates asic-1;mec-10;degt-1	I.A1M10D1	0.3208	16.67
Isolates asic-1;mec-10;degt-1	I.A1M10D1	0.3396	11.76
Isolates asic-1;mec-10;degt-1	I.A1M10D1	0.5109	3.57
Isolates asic-1;mec-10;degt-1	I.A1M10D1	0.3579	14.75
Isolates asic-1;mec-10;degt-1	I.A1M10D1	0.5682	6.78
Isolates asic-1;mec-10;degt-1	I.A1M10D1	0.1538	44.44
Isolates asic-1;mec-10;degt-1	I.A1M10D1	0.3929	24.07
Isolates asic-1;mec-10;degt-1	I.A1M10D1	0.1714	7.69
Isolates asic-1;mec-10;degt-1	I.A1M10D1	0.275	19.23
Isolates asic-1;mec-10;degt-1	I.A1M10D1	0.2	20.41
Isolates asic-1;mec-10;degt-1	I.A1M10D1	0.1224	18.18
Isolates asic-1;mec-10;degt-1	I.A1M10D1	0.4688	19.05
Isolates asic-1;mec-10;degt-1	I.A1M10D1	0.6667	4.76
Isolates asic-1;mec-10;degt-1	I.A1M10D1	0.2188	15.79
Isolates asic-1;mec-10;degt-1	I.A1M10D1	0.3	28.57
Isolates asic-1;mec-10;degt-1	I.A1M10D1	0.4419	14.29
Isolates asic-1;mec-10;degt-1	I.A1M10D1	0.7353	10.53
Isolates asic-1;mec-10;degt-1	I.A1M10D1	0.5676	4
Isolates asic-1;mec-10;degt-1	I.A1M10D1	0.5349	8.33
Isolates asic-1;mec-10;degt-1	I.A1M10D1	0.3514	48
Isolates asic-1;mec-10;degt-1	I.A1M10D1	0.2121	9.52
crowded asic-1;mec-10;degt-1	G.A1M10D1	0.1848	45.1
crowded asic-1;mec-10;degt-1	G.A1M10D1	0.19	35.09
crowded asic-1;mec-10;degt-1	G.A1M10D1	0.2647	33.33
crowded asic-1;mec-10;degt-1	G.A1M10D1	0.5116	11.54
crowded asic-1;mec-10;degt-1	G.A1M10D1	0.2955	18.75
crowded asic-1;mec-10;degt-1	G.A1M10D1	0.1739	36.59
crowded asic-1;mec-10;degt-1	G.A1M10D1	0.24	65.96
crowded asic-1;mec-10;degt-1	G.A1M10D1	0.9688	8.7
crowded asic-1;mec-10;degt-1	G.A1M10D1	0.6267	34.09
crowded asic-1;mec-10;degt-1	G.A1M10D1	0.6154	10.81
crowded asic-1;mec-10;degt-1	G.A1M10D1	0.2737	36.67
crowded asic-1;mec-10;degt-1	G.A1M10D1	1.0938	7.32
crowded asic-1;mec-10;degt-1	G.A1M10D1	0.1719	62.16
crowded asic-1;mec-10;degt-1	G.A1M10D1	0.375	33.33
crowded asic-1;mec-10;degt-1	G.A1M10D1	0.3043	28.57
crowded asic-1;mec-10;degt-1	G.A1M10D1	0.4063	19.05
crowded asic-1;mec-10;degt-1	G.A1M10D1	0.4375	44.44
crowded asic-1;mec-10;degt-1	G.A1M10D1	0.2703	15.56
crowded asic-1;mec-10;degt-1	G.A1M10D1	0.4688	8.33
crowded asic-1;mec-10;degt-1	G.A1M10D1	0.3088	23.26
crowded asic-1;mec-10;degt-1	G.A1M10D1	0.3117	26.09
crowded asic-1;mec-10;degt-1	G.A1M10D1	0.2857	34.78
crowded asic-1;mec-10;degt-1	G.A1M10D1	0.0435	28.57
Isolated asic-1	I.A1	0.6613	13.16
Isolated asic-1	I.A1	0.3636	11.76
Isolated asic-1	I.A1	0.2414	6.67
Isolated asic-1	I.A1	0.1212	44.68
Isolated asic-1	I.A1	0.2955	11.32
Isolated asic-1	I.A1	0.359	29.17
Isolated asic-1	I.A1	1.1667	0
Isolated asic-1	I.A1	0.2571	4.55
Isolated asic-1	I.A1	0.5238	32.43
Isolated asic-1	I.A1	0.6984	10.26
Isolated asic-1	I.A1	0.4828	6.67
Isolated asic-1	I.A1	0.1923	14.29
Isolated asic-1	I.A1	0.1311	43.9
Isolated asic-1	I.A1	0.1667	42.86
Isolated asic-1	I.A1	0.4706	20
Isolated asic-1	I.A1	0.5294	57.89
Isolated asic-1	I.A1	0.7719	16.67
Isolated asic-1	I.A1	0.6056	16.67
Isolated asic-1	I.A1	0.2778	13.04
Isolated asic-1	I.A1	0.303	10
Isolated asic-1	I.A1	0.4032	20.51
Isolated asic-1	I.A1	0.2727	12
Isolated asic-1	I.A1	0.2333	11.76
Isolated asic-1	I.A1	0.3919	6.67
Isolated asic-1	I.A1	0.6786	0
Crowded asic-1	G.A1	0.25	33.33
Crowded asic-1	G.A1	0.12	64.71
Crowded asic-1	G.A1	0.3667	12.82
Crowded asic-1	G.A1	0.1692	10.53
Crowded asic-1	G.A1	0.4474	0
Crowded asic-1	G.A1	0.12	45.83
Crowded asic-1	G.A1	0.2581	48.84
Crowded asic-1	G.A1	0.2	33.33
Crowded asic-1	G.A1	0.125	25
Crowded asic-1	G.A1	0.3684	2.63
Crowded asic-1	G.A1	0.1094	8.11
Crowded asic-1	G.A1	0.4211	4.17
Crowded asic-1	G.A1	0.1282	34
Crowded asic-1	G.A1	0.2414	8.82
Crowded asic-1	G.A1	0.3421	38.3
Crowded asic-1	G.A1	0.1515	40.91
Crowded asic-1	G.A1	0.3824	38.1
Crowded asic-1	G.A1	0.1875	31.03
Crowded asic-1	G.A1	0.082	35.14
Crowded asic-1	G.A1	0.1867	30.43
Crowded asic-1	G.A1	0.1375	35.29
Crowded asic-1	G.A1	0.0571	33.33
Isolated asic-1;mec-10	I.A1M10	0.5246	8.57
Isolated asic-1;mec-10	I.A1M10	0.7143	11.76
Isolated asic-1;mec-10	I.A1M10	0.2292	46.43
Isolated asic-1;mec-10	I.A1M10	0.3438	28.57
Isolated asic-1;mec-10	I.A1M10	0.25	5.13
Isolated asic-1;mec-10	I.A1M10	0.1489	0
Isolated asic-1;mec-10	I.A1M10	0.3867	10.87
Isolated asic-1;mec-10	I.A1M10	0.3636	9.52
Isolated asic-1;mec-10	I.A1M10	0.6071	21.05
Isolated asic-1;mec-10	I.A1M10	0.4667	9.3
Isolated asic-1;mec-10	I.A1M10	0.2742	23.81
Isolated asic-1;mec-10	I.A1M10	0.5526	8.33
Isolated asic-1;mec-10	I.A1M10	0.6667	23.08
Isolated asic-1;mec-10	I.A1M10	0.7091	11.11
Isolated asic-1;mec-10	I.A1M10	0.5429	0
Isolated asic-1;mec-10	I.A1M10	0.6066	21.05
Isolated asic-1;mec-10	I.A1M10	0.25	9.09
Isolated asic-1;mec-10	I.A1M10	0.6296	3.13
Isolated asic-1;mec-10	I.A1M10	0.3333	4.76
Isolated asic-1;mec-10	I.A1M10	0.525	4.35
Isolated asic-1;mec-10	I.A1M10	0.3617	15.52
Isolated asic-1;mec-10	I.A1M10	0.6481	14.71
Isolated asic-1;mec-10	I.A1M10	0.2222	9.52
Isolated asic-1;mec-10	I.A1M10	0.6271	4.88
Isolated asic-1;mec-10	I.A1M10	0.4211	9.52
Isolated asic-1;mec-10	I.A1M10	0.8085	20
Isolated asic-1;mec-10	I.A1M10	0.8222	28.57
Isolated asic-1;mec-10	I.A1M10	0.5625	4.76
Isolated asic-1;mec-10	I.A1M10	0.6418	23.26
Isolated asic-1;mec-10	I.A1M10	0.5152	0
Isolated asic-1;mec-10	I.A1M10	0.6667	13.64
Crowded asic-1;mec-10	G.A1M10	0.5957	17.65
Crowded asic-1;mec-10	G.A1M10	0	47.62
Crowded asic-1;mec-10	G.A1M10	0.0857	52.17
Crowded asic-1;mec-10	G.A1M10	0.1897	63.89
Crowded asic-1;mec-10	G.A1M10	0.375	22.86
Crowded asic-1;mec-10	G.A1M10	0.1923	41.46
Crowded asic-1;mec-10	G.A1M10	0.6364	52.38
Crowded asic-1;mec-10	G.A1M10	0.2969	67.57
Crowded asic-1;mec-10	G.A1M10	0.375	48.65
Crowded asic-1;mec-10	G.A1M10	0.3438	18.42
Crowded asic-1;mec-10	G.A1M10	0.0789	57.89
Crowded asic-1;mec-10	G.A1M10	0.1356	33.33
Crowded asic-1;mec-10	G.A1M10	0.1429	38.46
Crowded asic-1;mec-10	G.A1M10	0.1471	38.1
Crowded asic-1;mec-10	G.A1M10	0.2857	28.57
Crowded asic-1;mec-10	G.A1M10	0.3333	18.75
Crowded asic-1;mec-10	G.A1M10	0.3065	38.1
Crowded asic-1;mec-10	G.A1M10	0.0851	20
Crowded asic-1;mec-10	G.A1M10	0.3077	57.14
Crowded asic-1;mec-10	G.A1M10	0.2368	54.55
Crowded asic-1;mec-10	G.A1M10	0.375	31.58
Crowded asic-1;mec-10	G.A1M10	0.2167	26.19
Crowded asic-1;mec-10	G.A1M10	0.2239	55
Crowded asic-1;mec-10	G.A1M10	0.1905	38.1
Crowded asic-1;mec-10	G.A1M10	0.2462	25
Crowded asic-1;mec-10	G.A1M10	0.0667	26.32
Crowded asic-1;mec-10	G.A1M10	1	5.26
Crowded asic-1;mec-10	G.A1M10	0.6275	41.67
Crowded asic-1;mec-10	G.A1M10	0.4918	35.9
Crowded asic-1;mec-10	G.A1M10	0.3514	15

## Sheet: Statistics Figure 4 Fig supp. 2
	Mann-Whitney Test
												Mann-Whitney Test
	Ranks																					Mann-Whitney Test											Mann-Whitney Test										Mann-Whitney Test
	group1		N	Mean Rank	Sum of Ranks							Ranks
	ectopic	I.WT	26	35.2115	915.5							group1		N	Mean Rank	Sum of Ranks						Ranks											Ranks										Ranks
		G.WT	28	20.3393	569.5							ectopic	I.A1	25	30.98	774.5						group1		N	Mean Rank	Sum of Ranks							group1		N	Mean Rank	Sum of Ranks						group1		N	Mean Rank	Sum of Ranks
		Total	54										G.A1	22	16.0682	353.5						ectopic	I.M10	24	34.6042	830.5							ectopic	I.A1M10	31	40.5161	1256						ectopic	I.DEGT	24	23.9167	574
	quaternary	I.WT	26	32.8654	854.5								Total	47									G.M10	30	21.8167	654.5								G.A1M10	30	21.1667	635							G.DEGT	28	28.7143	804
		G.WT	28	22.5179	630.5							quaternary	I.A1	25	27.26	681.5							Total	54										Total	61									Total	52
		Total	54										G.A1	22	20.2955	446.5						quaternary	I.M10	24	31.8125	763.5							quaternary	I.A1M10	31	33.629	1042.5						quaternary	I.DEGT	24	26.9792	647.5
	teriary	I.WT	26	31.0385	807								Total	47									G.M10	30	24.05	721.5								G.A1M10	30	28.2833	848.5							G.DEGT	28	26.0893	730.5
		G.WT	24	19.5	468							teriary	I.A1	25	24.84	621							Total	54										Total	61									Total	52
		Total	50										G.A1	22	23.0455	507						teriary	I.M10	24	29.5208	708.5							teriary	I.A1M10	31	31.5	976.5						teriary	I.DEGT	24	26.5833	638
	five	I.WT	26	34.3077	892								Total	47									G.M10	30	25.8833	776.5								G.A1M10	30	30.4833	914.5							G.DEGT	28	26.4286	740
		G.WT	28	21.1786	593							five	I.A1	25	31.8	795							Total	54										Total	61									Total	52
		Total	54										G.A1	22	15.1364	333						five	I.M10	24	33.75	810							five	I.A1M10	31	41.2581	1279						five	I.DEGT	24	24.2917	583
	width	I.WT	26	28.2115	733.5								Total	47									G.M10	30	22.5	675								G.A1M10	30	20.4	612							G.DEGT	28	28.3929	795
		G.WT	28	26.8393	751.5							width	I.A1	25	23.68	592							Total	54										Total	61									Total	52
		Total	54										G.A1	22	24.3636	536						width	I.M10	24	27.3958	657.5							width	I.A1M10	31	33.1613	1028						width	I.DEGT	24	24.5208	588.5
	straight	I.WT	26	16.9423	440.5								Total	47									G.M10	30	27.5833	827.5								G.A1M10	30	28.7667	863							G.DEGT	28	28.1964	789.5
		G.WT	28	37.3036	1044.5							straight	I.A1	25	20.68	517							Total	54										Total	61									Total	52
		Total	54										G.A1	22	27.7727	611						straight	I.M10	24	18.5625	445.5							straight	I.A1M10	31	19.0161	589.5						straight	I.DEGT	24	20.5	492
	selfAvoidance	I.WT	26	32.0385	833								Total	47									G.M10	30	34.65	1039.5								G.A1M10	30	43.3833	1301.5							G.DEGT	28	31.6429	886
		G.WT	28	23.2857	652							selfAvoidance	I.A1	25	24.72	618							Total	54										Total	61									Total	52
		Total	54										G.A1	22	23.1818	510						selfAvoidance	I.M10	24	30.1458	723.5							selfAvoidance	I.A1M10	31	31.2258	968						selfAvoidance	I.DEGT	24	29.1458	699.5
													Total	47									G.M10	30	25.3833	761.5								G.A1M10	30	30.7667	923							G.DEGT	28	24.2321	678.5
																							Total	54										Total	61									Total	52
	Test Statisticsa											Test Statisticsa
		ectopic	quaternary	teriary	five	width	straight	selfAvoidance					ectopic	quaternary	teriary	five	width	straight	selfAvoidance			Test Statisticsa											Test Statisticsa										Test Statisticsa
	Mann-Whitney U	163.5	224.5	168	187	345.5	89.5	246				Mann-Whitney U	100.5	193.5	254	80	267	192	257				ectopic	quaternary	teriary	five	width	straight	selfAvoidance					ectopic	quaternary	teriary	five	width	straight	selfAvoidance				ectopic	quaternary	teriary	five	width	straight
	Wilcoxon W	569.5	630.5	468	593	751.5	440.5	652				Wilcoxon W	353.5	446.5	507	333	592	517	510			Mann-Whitney U	189.5	256.5	311.5	210	357.5	145.5	296.5				Mann-Whitney U	170	383.5	449.5	147	398	93.5	458			Mann-Whitney U	274	324.5	334	283	288.5	192
	Z	-3.47142	-2.47092	-2.82308	-3.07164	-0.320355	-4.75464	-2.35854				Z	-3.72057	-1.76742	-0.454323	-4.15802	-0.1706	-1.77028	-0.454962			Wilcoxon W	654.5	721.5	776.5	675	657.5	445.5	761.5				Wilcoxon W	635	848.5	914.5	612	863	589.5	923			Wilcoxon W	574	730.5	740	583	588.5	492
	Asymp. Sig. (2-tailed)	0.000517706	0.0134765	0.00475645	0.00212885	0.748699	1.98798e-06	0.0183472				Asymp. Sig. (2-tailed)	0.000198776	0.0771578	0.649596	3.21025e-05	0.864538	0.0766801	0.649136			Z	-2.96819	-1.80311	-0.852108	-2.61156	-0.0435302	-3.73567	-1.1825				Z	-4.25614	-1.18546	-0.230141	-4.58991	-0.966737	-5.3607	-0.121058			Z	-1.13805	-0.212454	-0.0372862	-0.972866	-0.871983	-2.64399
	a. Grouping Variable: group1											a. Grouping Variable: group1										Asymp. Sig. (2-tailed)	0.00299555	0.0713704	0.394154	0.00901294	0.965279	0.000187212	0.237006				Asymp. Sig. (2-tailed)	2.0799e-05	0.235834	0.817982	4.43431e-06	0.333675	8.29016e-08	0.903645			Asymp. Sig. (2-tailed)	0.255101	0.831753	0.970257	0.33062	0.383218	0.00819343
																						a. Grouping Variable: group1											a. Grouping Variable: group1										a. Grouping Variable: group1
	Mann-Whitney Test
	Ranks											Mann-Whitney Test											Mann-Whitney Test
	group1		N	Mean Rank	Sum of Ranks
	ectopic	I.WT	26	23.5385	612							Ranks											Ranks											Mann-Whitney Test
		I.A1	25	28.56	714							group1		N	Mean Rank	Sum of Ranks							group1		N	Mean Rank	Sum of Ranks																			Mann-Whitney Test
		Total	51									ectopic	I.WT	26	22	572							ectopic	I.WT	26	21.8846	569							Ranks
	quaternary	I.WT	26	29.2115	759.5								I.M10	24	29.2917	703								I.A1M10	31	34.9677	1084							group1		N	Mean Rank	Sum of Ranks								Ranks
		I.A1	25	22.66	566.5								Total	50										Total	57									ectopic	I.WT	26	21.8077	567								group1		N	Mean Rank
		Total	51									quaternary	I.WT	26	23.8462	620							quaternary	I.WT	26	30.2885	787.5								I.DEGT	24	29.5	708								ectopic	I.WT	26	32.2692
	teriary	I.WT	26	32.6923	850								I.M10	24	27.2917	655								I.A1M10	31	27.9194	865.5								Total	50											I.M10D1	28	23.0714
		I.A1	25	19.04	476								Total	50										Total	57									quaternary	I.WT	26	27.3269	710.5									Total	54
		Total	51									teriary	I.WT	26	29.2885	761.5							teriary	I.WT	26	36.4423	947.5								I.DEGT	24	23.5208	564.5								quaternary	I.WT	26	27.9423
	five	I.WT	26	18.7115	486.5								I.M10	24	21.3958	513.5								I.A1M10	31	22.7581	705.5								Total	50											I.M10D1	28	27.0893
		I.A1	25	33.58	839.5								Total	50										Total	57									teriary	I.WT	26	31.2115	811.5									Total	54
		Total	51									five	I.WT	26	19.5	507							five	I.WT	26	18.4038	478.5								I.DEGT	24	19.3125	463.5								teriary	I.WT	26	32.1154
	width	I.WT	26	29.8654	776.5								I.M10	24	32	768								I.A1M10	31	37.8871	1174.5								Total	50											I.M10D1	28	23.2143
		I.A1	25	21.98	549.5								Total	50										Total	57									five	I.WT	26	17.0962	444.5									Total	54
		Total	51									width	I.WT	26	26.4423	687.5							width	I.WT	26	29.0385	755								I.DEGT	24	34.6042	830.5								five	I.WT	26	29.0577
	straight	I.WT	26	22.2692	579								I.M10	24	24.4792	587.5								I.A1M10	31	28.9677	898								Total	50											I.M10D1	28	26.0536
		I.A1	25	29.88	747								Total	50										Total	57									width	I.WT	26	31.9038	829.5									Total	54
		Total	51									straight	I.WT	26	25.9808	675.5							straight	I.WT	26	27.0192	702.5								I.DEGT	24	18.5625	445.5								width	I.WT	26	34.1538
	selfAvoidance	I.WT	26	28.3654	737.5								I.M10	24	24.9792	599.5								I.A1M10	31	30.6613	950.5								Total	50											I.M10D1	28	21.3214
		I.A1	25	23.54	588.5								Total	50										Total	57									straight	I.WT	26	25.1154	653									Total	54
		Total	51									selfAvoidance	I.WT	26	24.9038	647.5							selfAvoidance	I.WT	26	32.0962	834.5								I.DEGT	24	25.9167	622								straight	I.WT	26	16.8077
													I.M10	24	26.1458	627.5								I.A1M10	31	26.4032	818.5								Total	50											I.M10D1	28	37.4286
	Test Statisticsa												Total	50										Total	57									selfAvoidance	I.WT	26	27.5	715									Total	54
		ectopic	quaternary	teriary	five	width	straight	selfAvoidance																											I.DEGT	24	23.3333	560								selfAvoidance	I.WT	26	31.1923
	Mann-Whitney U	261	241.5	151	135.5	224.5	228	263.5				Test Statisticsa											Test Statisticsa												Total	50											I.M10D1	28	24.0714
	Wilcoxon W	612	566.5	476	486.5	549.5	579	588.5					ectopic	quaternary	teriary	five	width	straight	selfAvoidance					ectopic	quaternary	teriary	five	width	straight	selfAvoidance																	Total	54
	Z	-1.20596	-1.58205	-3.29296	-3.57157	-1.89399	-1.82968	-1.26939				Mann-Whitney U	221	269	213.5	156	287.5	299.5	296.5				Mann-Whitney U	218	369.5	209.5	127.5	402	351.5	322.5				Test Statisticsa
	Asymp. Sig. (2-tailed)	0.227834	0.113639	0.000991392	0.000354845	0.0582268	0.0672972	0.204303				Wilcoxon W	572	620	513.5	507	587.5	599.5	647.5				Wilcoxon W	569	865.5	705.5	478.5	898	702.5	818.5					ectopic	quaternary	teriary	five	width	straight	selfAvoidance					Test Statisticsa
	a. Grouping Variable: group1											Z	-1.76724	-0.837104	-1.92159	-3.02941	-0.475842	-0.243485	-0.317034				Z	-2.96416	-0.539391	-3.1262	-4.41699	-0.0160254	-0.826043	-1.42246				Mann-Whitney U	216	264.5	163.5	93.5	145.5	302	260						ectopic	quaternary	teriary
												Asymp. Sig. (2-tailed)	0.0771875	0.402534	0.0546573	0.00245028	0.634187	0.80763	0.751218				Asymp. Sig. (2-tailed)	0.00303508	0.589617	0.00177083	1.00085e-05	0.987214	0.40878	0.154893				Wilcoxon W	567	564.5	463.5	444.5	445.5	653	560					Mann-Whitney U	240	352.5	244
												a. Grouping Variable: group1											a. Grouping Variable: group1											Z	-1.86426	-0.929407	-2.89948	-4.24322	-3.23355	-0.1946	-1.10098					Wilcoxon W	646	758.5	650
																																		Asymp. Sig. (2-tailed)	0.0622859	0.352678	0.00373786	2.20331e-05	0.00122262	0.845706	0.270906					Z	-2.14675	-0.19962	-2.08215
																																		a. Grouping Variable: group1												Asymp. Sig. (2-tailed)	0.031813	0.841778	0.0373288
																																														a. Grouping Variable: group1
	Mann-Whitney Test									Mann-Whitney Test											Mann-Whitney Test
	Ranks									Ranks											Ranks											Mann-Whitney Test
	group1		N	Mean Rank	Sum of Ranks					group1		N	Mean Rank	Sum of Ranks							group1		N	Mean Rank	Sum of Ranks																					Mann-Whitney Test
	ectopic	G.WT	28	23.6786	663					ectopic	G.WT	28	22.0714	618							ectopic	G.WT	28	24.4286	684							Ranks
		G.A1	22	27.8182	612						G.M10	30	36.4333	1093								G.A1M10	30	34.2333	1027							group1		N	Mean Rank	Sum of Ranks										Ranks
		Total	50								Total	58										Total	58									ectopic	G.WT	28	16.9107	473.5										group1		N	Mean Rank
	quaternary	G.WT	28	25.9821	727.5					quaternary	G.WT	28	23.3214	653							quaternary	G.WT	28	26.3571	738								G.DEGT	28	40.0893	1122.5										ectopic	G.WT	28	21.2143
		G.A1	22	24.8864	547.5						G.M10	30	35.2667	1058								G.A1M10	30	32.4333	973								Total	56													G.M10D1	26	34.2692
		Total	50								Total	58										Total	58									quaternary	G.WT	28	24.8571	696											Total	54
	teriary	G.WT	24	23.875	573					teriary	G.WT	24	26.9375	646.5							teriary	G.WT	24	28.1042	674.5								G.DEGT	28	32.1429	900										quaternary	G.WT	28	21.2143
		G.A1	22	23.0909	508						G.M10	30	27.95	838.5								G.A1M10	30	27.0167	810.5								Total	56													G.M10D1	26	34.2692
		Total	46								Total	54										Total	54									teriary	G.WT	24	25.9792	623.5											Total	54
	five	G.WT	28	19.6607	550.5					five	G.WT	28	20.75	581							five	G.WT	28	22.25	623								G.DEGT	28	26.9464	754.5										teriary	G.WT	24	23.625
		G.A1	22	32.9318	724.5						G.M10	30	37.6667	1130								G.A1M10	30	36.2667	1088								Total	52													G.M10D1	26	27.2308
		Total	50								Total	58										Total	58									five	G.WT	28	16.3571	458											Total	50
	width	G.WT	28	27.875	780.5					width	G.WT	28	29.3036	820.5							width	G.WT	28	29.7321	832.5								G.DEGT	28	40.6429	1138										five	G.WT	28	19.5714
		G.A1	22	22.4773	494.5						G.M10	30	29.6833	890.5								G.A1M10	30	29.2833	878.5								Total	56													G.M10D1	26	36.0385
		Total	50								Total	58										Total	58									width	G.WT	28	33.7143	944											Total	54
	straight	G.WT	28	27.4107	767.5					straight	G.WT	28	38.2857	1072							straight	G.WT	28	28.4107	795.5								G.DEGT	28	23.2857	652										width	G.WT	28	33
		G.A1	22	23.0682	507.5						G.M10	30	21.3	639								G.A1M10	30	30.5167	915.5								Total	56													G.M10D1	26	21.5769
		Total	50								Total	58										Total	58									straight	G.WT	28	37.4286	1048											Total	54
	selfAvoidance	G.WT	28	24.4821	685.5					selfAvoidance	G.WT	28	25.9286	726							selfAvoidance	G.WT	28	28.0357	785								G.DEGT	28	19.5714	548										straight	G.WT	28	25.6071
		G.A1	22	26.7955	589.5						G.M10	30	32.8333	985								G.A1M10	30	30.8667	926								Total	56													G.M10D1	26	29.5385
		Total	50								Total	58										Total	58									selfAvoidance	G.WT	28	28.9643	811											Total	54
																																	G.DEGT	28	28.0357	785										selfAvoidance	G.WT	28	25.875
	Test Statisticsa									Test Statisticsa											Test Statisticsa												Total	56													G.M10D1	26	29.25
		ectopic	quaternary	teriary	five	width	straight	selfAvoidance			ectopic	quaternary	teriary	five	width	straight	selfAvoidance					ectopic	quaternary	teriary	five	width	straight	selfAvoidance																			Total	54
	Mann-Whitney U	257	294.5	255	144.5	241.5	254.5	279.5		Mann-Whitney U	212	247	346.5	175	414.5	174	320				Mann-Whitney U	278	332	345.5	217	413.5	389.5	379				Test Statisticsa
	Wilcoxon W	663	547.5	508	550.5	494.5	507.5	685.5		Wilcoxon W	618	653	646.5	581	820.5	639	726				Wilcoxon W	684	738	810.5	623	878.5	795.5	785					ectopic	quaternary	teriary	five	width	straight	selfAvoidance							Test Statisticsa
	Z	-0.996892	-0.277913	-0.204323	-3.20285	-1.29996	-1.04601	-0.722337		Z	-3.23674	-2.72263	-0.23894	-3.82276	-0.0856028	-3.82848	-1.83605				Z	-2.21007	-1.40919	-0.261619	-3.16988	-0.101186	-0.474677	-0.829013				Mann-Whitney U	67.5	290	323.5	52	246	142	379								ectopic	quaternary	teriary
	Asymp. Sig. (2-tailed)	0.318817	0.781079	0.838101	0.00136076	0.193614	0.295556	0.470088		Asymp. Sig. (2-tailed)	0.00120902	0.0064764	0.811152	0.000131968	0.931782	0.000128935	0.066351				Asymp. Sig. (2-tailed)	0.0271	0.15878	0.793615	0.00152503	0.919403	0.635017	0.407097				Wilcoxon W	473.5	696	623.5	458	652	548	785							Mann-Whitney U	188	188	267
	a. Grouping Variable: group1									a. Grouping Variable: group1											a. Grouping Variable: group1											Z	-5.31789	-1.70582	-0.235499	-5.58011	-2.39305	-4.09727	-0.307129							Wilcoxon W	594	594	567
																																Asymp. Sig. (2-tailed)	1.04976e-07	0.0880414	0.813821	2.40362e-08	0.0167089	4.18052e-05	0.758745							Z	-3.04706	-3.08837	-0.886256
																																														Asymp. Sig. (2-tailed)	0.00231091	0.0020126	0.375479
																																a. Grouping Variable: group1														a. Grouping Variable: group1
		group1
		I.WT						G.WT																		I.A1						G.A1						I.M10						G.M10
		Mean	Count	Median	Maximum	Standard Error of Mean	Standard Deviation	Mean	Count	Median	Maximum	Standard Error of Mean	Standard Deviation													Mean	Count	Median	Maximum	Standard Error of Mean	Standard Deviation	Mean	Count	Median	Maximum	Standard Error of Mean	Standard Deviation	Mean	Count	Median	Maximum	Standard Error of Mean	Standard Deviation	Mean	Count	Median	Maximum	Standard Error of Mean	Standard Deviation
	ectopic	38.5798	26	38.462	109.091	4.20383	21.4354	20.1621	28	16.285	63.64	3.11377	16.4765												ectopic	46.8964	25	47.06	116.67	5.10014	25.5007	22.0532	22	18.71	44.74	2.5127	11.7856	47.8408	24	42.86	92	4.04332	19.8081	33.147	30	30.895	105.56	3.283	17.9818
	quaternary	29.0387	26	21.905	100	5.84251	29.7911	12.1968	28	9.72	100	3.73729	19.7759												quaternary	17.662	25	10	107.14	4.65472	23.2736	10.6305	22	5.57	55.56	3.28145	15.3914	31.74	24	25.835	100	5.58597	27.3656	18.063	30	17.65	40	1.92041	10.5185
	teriary	55.4329	26	45	166.667	8.77166	44.7269	24.0625	28	16.67	133.33	6.30511	30.8886												teriary	20.8968	25	20	66.67	3.62213	18.1107	18.3141	22	17.425	50	3.6835	17.2772	33.2545	24	25	120	6.93218	33.9606	23.8459	30	18.335	125	4.9552	27.1407
	five	25.4535	26	22.9165	100	4.15563	21.1897	12.8543	28	5.56	84.62	3.70312	19.5951												five	54.4684	25	52.08	125.81	6.20311	31.0155	20.3195	22	18.035	47.62	2.49461	11.7008	43.9438	24	42.36	94.12	4.57756	22.4254	28.01	30	25	92.31	3.28156	17.9738
	width	286.288	26	291	345	5.56031	28.3521	286.214	28	280	345	5.83834	30.8936												width	271.18	25	270	320	5.33509	26.6755	272.841	22	270.5	302	3.54904	16.6465	281.042	24	286	321.5	5.25249	25.7319	283.95	30	285	333	3.712	20.3315
	straight	12.5488	26	7.57	64.1	2.72446	13.8921	34.8268	28	32.665	75	2.95129	15.6168												straight	18.2772	25	13.04	57.89	3.02627	15.1313	27.9386	22	33.33	64.71	3.60933	16.9292	10.4792	24	8.515	37.5	1.95583	9.58157	21.0407	30	21.635	34.21	1.64431	9.00626
	selfAvoidance	10.0531	26	8.71	50	2.43472	12.4147	3.62821	28	0	25	1.46398	7.74665												selfAvoidance	5.5336	25	0	22.22	1.57998	7.89992	4.45727	22	0	20	1.48718	6.97551	12.4554	24	10.415	57.14	3.26257	15.9833	6.967	30	0	33.33	1.6265	8.90868
	Mann-Whitney Test							Mann-Whitney Test
	Ranks							Ranks
	group1		N	Mean Rank	Sum of Ranks			group1		N	Mean Rank	Sum of Ranks
	ectopic	I.WT	26	32.2692	839			ectopic	G.WT	28	21.2143	594
		I.M10D1	28	23.0714	646				G.M10D1	26	34.2692	891
		Total	54						Total	54
	straight	I.WT	26	16.8077	437			straight	G.WT	28	25.6071	717
		I.M10D1	28	37.4286	1048				G.M10D1	26	29.5385	768
		Total	54						Total	54
	selfAvoidance	I.WT	26	31.1923	811			selfAvoidance	G.WT	28	25.875	724.5
		I.M10D1	28	24.0714	674				G.M10D1	26	29.25	760.5
		Total	54						Total	54
	PVDTotal	I.WT	26	37.2692	969			PVDTotal	G.WT	28	23.8929	669
		I.M10D1	28	18.4286	516				G.M10D1	26	31.3846	816
		Total	54						Total	54
	width	I.WT	26	34.1538	888			width	G.WT	28	33	924
		I.M10D1	28	21.3214	597				G.M10D1	26	21.5769	561
		Total	54						Total	54
	Test Statisticsa							Test Statisticsa
		ectopic	straight	selfAvoidance	PVDTotal	width			ectopic	straight	selfAvoidance	PVDTotal	width
	Mann-Whitney U	240	86	268	110	191		Mann-Whitney U	188	311	318.5	263	210
	Wilcoxon W	646	437	674	516	597		Wilcoxon W	594	717	724.5	669	561
	Z	-2.14675	-4.81426	-1.84666	-4.39721	-2.99592		Z	-3.04706	-0.917668	-0.998303	-1.7485	-2.66699
	Asymp. Sig. (2-tailed)	0.031813	1.4775e-06	0.0647969	1.09651e-05	0.00273617		Asymp. Sig. (2-tailed)	0.00231091	0.358793	0.318132	0.080378	0.00765336
	a. Grouping Variable: group1							a. Grouping Variable: group1
[truncated: 27 more columns]
