# Supplementary material for: Sensory experience controls dendritic structure and behavior by distinct pathways involving degenerins
Source: eLife. 2025 Jan 10;14:e83973. doi: 10.7554/eLife.83973 (PMC11756856; doi:10.7554/eLife.83973)
Supplement: Figure 4—figure supplement 3—source data 1. [file elife-83973-fig4-figsupp3-data1.xlsx]

## Sheet: G
		Isolated									Crowded
			% SA defects								% SA defects
			0								0
			71.4286								0
			12.5								0
			20								20
			0								50
			50								0
			0								0
			0								0
			0								0
			0								0
			0								0
			0								0
			42.8571								0
			14.2857								20
			28.5714								0
			33.3333								0
			28.5714								0
			0								0
			7.69231								0
			0								0
			15.462								4.5
					Crowded	4.5
					Isolated	15.462
															Test Statisticsa
																% Self avoidane defects
															p-value	0.023836
														% Self avoidane defects
														p-value

## Sheet: I
				ISOLATED							Crowded
					% SA defects							% SA defects
					14.2857							28.5714
					57.1429							0
					33.3333							0
					16.6667							0
					0							28.5714
					0							14.2857
					0							0
					50							0
					28.5714							0
					0							0
					0							0
					25							0
					33.3333							16.6667
					0							0
					0							0
					12.5							0
					14.2857							0
					0							0
					0							12.5
					0							0
					16.6667							40
					8.33333							0
												0
												0
												0
												0
												0
												6.66667
												0
					14.0963							5.078
					Crowded	5.078
					Isolated	14.0963
										Mann-Whitney Test
										Test Statisticsa
											% Self avoidane defects
										p-value	0.0219574
								% Self avoidane defects
								p-value

## Sheet: J
			mec-4
		ISOLATED					CROWDED
			% SA defects					% SA defects
			25					0
			7.69231					0
			20					0
			16.6667					0
			33.3333					0
			25					0
			50					9.09091
			9.09091					0
			20					16.6667
			22.2222					0
			0					9.09091									Mann-Whitney Test
			0					0
			16.6667					20										% Self avoidane defects
			18.1818					8.33333									p-value	0.00402822
			0					0						% Self avoidane defects
			0					0						p-value
			11.1111					0
			0					0
			22.2222					0
			0					9.09091
			0
			14.1518					3.61364

## Sheet: K
					48 hrs
			CROWDED					ISOLATED
		% SA defects					% SA defects
		0					0
		0					4.7619
		0					0
		20					0
		8.33333					0
		0					0
		8.33333					0
		0					0
		0					0
		0					0
		0					33.3333
		0					0
		0					0
		0					8.33333
		7.69231					0
		0					20
		0					0
		11.1111					0
		0					0
		0					0
		0					0
		0					12.5
		0					12.5
		0					0
		8.33333
		0
		0
		0
		25
		0
		2.96011					3.80952
														Test Statisticsa
															% Self avoidane defects
														p-value	0.748234

## Sheet: C
					Crowded
					%loss of self avoidance
				WT crowded
					0
					0
					20
					0
					0
					10
					0
					0
					0
					0
					0
					0
					0
					25
					12.5
					0
					0
					0
					0
					0
					9.09091
					0
					0
					0
					25
					0
					0
					0
				AVG	3.62825
				him-5 crowded
					%loss of self avoidance							Kruskal-Wallis Test
					0
					0							Ranks
					0							Genotype		N	Mean Rank
					0							FractionEctopic	him-5	28	42.2857
					0								him-5;mec-10	36	56.4028
					0								him-5,mec-10;PVD::MEC-10	27	35.9815
					0								Total	91
					16.6667							Straight	him-5	28	47.3393
					0								him-5;mec-10	36	32.4583
					0								him-5,mec-10;PVD::MEC-10	27	62.6667
					0								Total	91
					0							SelfAvoidance	him-5	28	30.9107
					0								him-5;mec-10	36	51.1806
					0								him-5,mec-10;PVD::MEC-10	27	54.7407
					22.2222								Total	91
					0
					0
					12.5								SelfAvoidance
					0							Chi-Square	15.9801
					0							df	2
					0							Asymp. Sig.	0.000338814
					12.5							a. Kruskal Wallis Test
					0							b. Grouping Variable: Genotype
					0
					0
					0
					0
												Mann-Whitney Test
				AVG	2.36626
												Ranks
												Genotype		N	Mean Rank	Sum of Ranks
												SelfAvoidance	him-5	28	21.2143	594
													him-5,mec-10;PVD::MEC-10	27	35.037	946
													Total	55
				him-5;mec-10 CROWDED
					%loss of self avoidance
					0
					0								SelfAvoidance
					11.1111							Mann-Whitney U	188
					0							Wilcoxon W	594
					0							Z	-3.66081
					0							Asymp. Sig. (2-tailed)	0.000251422
					0							a. Grouping Variable: Genotype
					0
					14.2857
					16.6667
					6.66667
					11.1111
					12.5
					0
					0
					0
					10
					11.1111
					20
					22.2222
					0
					10
					0
					0
					33.3333
					10
					0
					0
					20
					0
				AVG	6.96693
				rescue strian
				him-5;mec-10 PDV::MEC-10 CROWDED
					%loss of self avoidance
					27.2727
					0
					10
					20
					0								Mann-Whitney Test
					0									% Self avoidane defects
					30								p-value	0.507464
					12.5
					12.5
					0					% Self avoidane defects
					0					p-value
					14.2857
					0
					0
					41.6667
					0
					11.1111
					0
					0
					0
					16.6667
					25
					26.6667
					22.2222
					8.33333
					18.1818
					22.2222
				AVG	11.8011

## Sheet: L
						24 HRS ADULTS
		Isolated 24 hrs									Crowded
			% self avoidance defects									% self avoidance defects
			0									0
			25									0
			80									0
			0									0
			16.6667									0
			0									0
			0									0
			0									0
			0									16.6667
			22.2222									16.6667
			28.5714									0
			50									0
			50									11.1111
			16.6667									0
			0									0
			0									0
			0									0
			16.6667									0
			0									0
			11.1111									0
			33.3333
		Avg	16.678									2.22222
		SE	4.77139									1.2357
						avg	SE
					Crowded	2.22222	1.2357
					Isolated	16.678	4.77139
																		Mann-Whitney Test
																			% Self avoidane defects
																		p-value	0.0074819

## Sheet: F
			Isolated responding						Isolated non responding
					% self avoidance						% self avoidance
					0						0
					0						7.69231
					7.69231						0
					0						0
					25						11.1111
					25						0
					0						22.2222
					18.1818						42.8571
					22.2222						0
					0						11.1111
					0						0
					33.3333						0
					25						25
					0						20
					22.2222						9.09091
					0						16.6667
					7.14286						0
					10						0
					37.5
					0
		Average			11.6647						9.20842
							The p-value is .59612

## Sheet: E
				Isolated 2hrs									Crowded 2hrs
					% SA defects									% SA defects
					0									0
					0									0
					0									0
					0									20
					9.09091									0
					0									0
					0									0
					0									0
					0									0						Statistics
					0									22.2222						% self avoidance defects
					0									0							P-value
					0									12.5						2 hr isolation	.61006
					0									0						5 hr isolation	0.77182
					0									0						24 hr isolation	0.02034
					0									0
					0									0
					0									0
					0									0
					12.5									0
					0									0
					0									0
					0									12.5
														0
														0
					0.981405									2.80093
				Isolated 5hrs
					% SA defects									% SA defects
					28.5714									0
					0									14.2857
					33.3333									0
					0									0
					16.6667									0
					0									0
					0									0
					0									0
					0									20
					0									12.5
					0									0
					0									0
					11.1111									0
					0									0
					0									0
					0									0
					0									33.3333
					0									0
					0									0
					0									0
					33.3333									0
					0									0
					0									0
					0
					0
					12.5
					0
					5.01911									3.48344
				Isolated 15 hrs									Crowded 15 hrs
					% SA defects									% SA defects
					0									0
					14.2857									0
					11.1111									11.1111
					8.46561									3.7037
				Isolated 24 hrs									24 hrs
					% SA defects									% SA defects
					0									0
					25									0
					80									0
					0									0
					16.6667									0
					0									0
					0									0
					0									0
					0									16.6667
					22.2222									16.6667
					28.5714									0
					50									0
					50									11.1111
					16.6667									0
					0									0
					0									0
					0									0
					16.6667									0
					0									0
					11.1111									0
					33.3333
														2.33918
					16.678

## Sheet: D
		%loss of self avoidance			%loss of self avoidance
	Isolated			crowded					Isolated with beads
		0			0					%loss of self avoidance
		15.3846			0					0
		11.1111			20					0
		9.09091			0					0
		0			0					16.6667
		0			10					20
		20			0					0
		0			0					0
		50			0					12.5
		16.6667			0					0
		20			0					0
		0			0					0
		0			0					0
		0			25					0
		16.6667			12.5					25
		22.2222			0					14.2857
		14.2857			0					0
		14.2857			0					0
		10			0					0
		0			0					11.1111
		33.3333			9.09091					0
		0			0					0
		8.33333			0					0
		0			0
		0			25
		66.6667			0				AVG	4.52561
					0				SE	1.70051
	AVG	12.6172			0
	SE	3.23117
				AVG	3.62825
				SE	1.46398
											Statistics
											% self avoidance defects
												P-value
											Crowded vs isolated	0.00779851
											Isolated vs isolated with beads	0.0410292

## Sheet: B
						%loss of self avoidance			%loss of self avoidance
						WT ISOLATED			WT crowded
						0			0
						15.3846			0
						11.1111			20
						9.09091			0
						0			0
						0			10
						20			0
						0			0
						50			0
						16.6667			0
						20			0
						0			0
						0			0
						0			25
						16.6667			12.5
						22.2222			0
						14.2857			0
						14.2857			0
						10			0
						0			0
						33.3333			9.09091
						0			0
						8.33333			0
						0			0
						0			25
						66.6667			0
									0
									0
										The p-value is .01928
					AVG	12.6172		AVG	3.62825
						him-5 ISOLATED			him-5 crowded
						%loss of self avoidance			%loss of self avoidance
						14.2857			0
						25			0
						18.1818			0
						20			0
						33.3333			0
						0			0
						0			0
						0			16.6667
						0			0
						0			0
						0			0
						12.5			0
						12.5			0
						40			0
						0			22.2222
						0			0
						40			0
						16.6667			12.5
						0			0
						8.33333			0
						16.6667			0
						14.2857			12.5
						0			0
						11.1111			0
						10			0
									0
									0
										The p-value is .00452.
					AVG	11.7146		AVG	2.36626
						him-5;mec-10 ISOLATED			him-5;mec-10 CROWDED
						%loss of self avoidance			%loss of self avoidance
						20			0
						16.6667			0
						12.5			11.1111
						25			0
						0			0
						16.6667			0
						0			0
						33.3333			0
						0			14.2857
						0			16.6667
						0			6.66667
						0			11.1111
						8.33333			12.5
						14.2857			0
						0			0
						20			0
						57.1429			10
						12.5			11.1111
						50			20
						0			22.2222
						0			0
						0			10
						0			0
						12.5			0
									33.3333
									10
									0
									0
									20
									0
										The p-value is .27134
					AVG	12.4554		AVG	6.96693
											%Self avoidance defects
							Crowded him-5 vs crowded him-5;mec-10				The p-value is .02807.

[truncated: 1 more sheets: H]
