# Supplementary material for: Sensory experience controls dendritic structure and behavior by distinct pathways involving degenerins
Source: eLife. 2025 Jan 10;14:e83973. doi: 10.7554/eLife.83973 (PMC11756856; doi:10.7554/eLife.83973)
Supplement: Figure 4—source data 1. [file elife-83973-fig4-data1.xlsx]

## Sheet: FIG. 4B+C
	Isolated responding			Isolated non responding
	ectopic/con-ectopic	% straight		ectopic/con-ectopic	% straight
	0.806452	0		0.371429	20
	0.16	31.0345		0.617647	9.52381
	0.367647	42.1053		0.333333	25
	0.34	9.375		0.482759	11.7647
	0.785714	10.5263		0.132075	3.7037
	0.282051	4.16667		0.166667	5
	0.407407	5.88235		0.230769	14.6341
	0.230769	22.8571		0.26	6.66667
	0.163265	0		0.363636	24
	0.285714	12		0.135135	18.1818
	0.388889	8.33333		0.438596	8.10811
	0.671875	16.2791		0.27027	14.2857
	0.243902	22.2222		0.340909	12.9032
	0.258621	5.88235		0.186047	14.2857
	0.409091	15.2542		0.267442	17.8571
	0.571429	9.09091		0.319149	6.45161
	0.333333	12.5		0.612245	3.33333
	0.24359	8.88889		0.386364	11.1111
	0.122449	7.14286
	0.475	10.3448
Average	0.37736	12.6943		0.328582	12.6006
Standard error	0.0440429	2.29514		0.0338462	1.55038
		ectopic/con-ectopic	Standard error
	Isolated responding	0.37736	0.0440429		.
	Isolated non responding	0.328582	0.0338462
		% straight 4ry branches	Standard error
	Isolated responding	12.6943	2.29514
	Isolated non responding	12.6006	1.55038

## Sheet: FIG. 4 A
	pvd sructure
	group	% ectopic	% straight	% selfAvoidance
N2 Isolated	I.WT	24.675	6.52	0
N2 Isolated	I.WT	33.333	6.25	15.38
N2 Isolated	I.WT	24.638	25	11.11
N2 Isolated	I.WT	28.571	31.11	9.09
N2 Isolated	I.WT	55.556	14.29	0
N2 Isolated	I.WT	41.026	8	0
N2 Isolated	I.WT	8	0	20
N2 Isolated	I.WT	40.385	8.57	0
N2 Isolated	I.WT	38.462	0	50
N2 Isolated	I.WT	46.341	4	16.67
N2 Isolated	I.WT	48.718	12	20
N2 Isolated	I.WT	17.073	32	0
N2 Isolated	I.WT	36.667	5	0
N2 Isolated	I.WT	20	64.1	0
N2 Isolated	I.WT	28.125	11.11	16.67
N2 Isolated	I.WT	16.129	5	22.22
N2 Isolated	I.WT	44.828	0	14.29
N2 Isolated	I.WT	5.556	4	14.29
N2 Isolated	I.WT	38.462	20.51	10
N2 Isolated	I.WT	41.667	4.17	0
N2 Isolated	I.WT	109.091	0	33.33
N2 Isolated	I.WT	50	13.33	0
N2 Isolated	I.WT	64.865	20	8.33
N2 Isolated	I.WT	46.667	17.65	0
N2 Isolated	I.WT	69.565	7.14	0
N2 Isolated	I.WT	76.19	5.88	66.67
N2 Crowded	G.WT	4.17	38.75	0
N2 Crowded	G.WT	6.82	54.76	0
N2 Crowded	G.WT	16.44	23.37	20
N2 Crowded	G.WT	9.68	50	0
N2 Crowded	G.WT	21.43	26.32	0
N2 Crowded	G.WT	16.13	75	10
N2 Crowded	G.WT	0	32	0
N2 Crowded	G.WT	17.65	31.58	0
N2 Crowded	G.WT	23.08	30.09	0
N2 Crowded	G.WT	5.56	36	0
N2 Crowded	G.WT	20	61.9	0
N2 Crowded	G.WT	14.29	30.43	0
N2 Crowded	G.WT	12.9	38.89	0
N2 Crowded	G.WT	5.13	24	25
N2 Crowded	G.WT	51.85	30.77	12.5
N2 Crowded	G.WT	36.59	15.38	0
N2 Crowded	G.WT	6.67	57.69	0
N2 Crowded	G.WT	4.08	31.82	0
N2 Crowded	G.WT	25.81	9.09	0
N2 Crowded	G.WT	11.43	36.36	0
N2 Crowded	G.WT	6.67	37.04	9.09
N2 Crowded	G.WT	19.35	38.89	0
N2 Crowded	G.WT	16.13	38.89	0
N2 Crowded	G.WT	63.64	0	0
N2 Crowded	G.WT	18.42	19.05	25
N2 Crowded	G.WT	51.85	43.75	0
N2 Crowded	G.WT	48	33.33	0
N2 Crowded	G.WT	30.77	30	0
Isolated mec-10	I.10M	86.21	37.5	20
Isolated mec-10	I.10M	61.54	22.22	16.67
Isolated mec-10	I.10M	29.82	8.82	12.5
Isolated mec-10	I.10M	18.33	18.42	25
Isolated mec-10	I.10M	42.86	13.33	0
Isolated mec-10	I.10M	41.46	0	16.67
Isolated mec-10	I.10M	33.33	8.7	0
Isolated mec-10	I.10M	52.38	7.14	33.33
Isolated mec-10	I.10M	33.8	14.89	0
Isolated mec-10	I.10M	39.39	8.33	0
Isolated mec-10	I.10M	42.31	6.25	0
Isolated mec-10	I.10M	36.67	0	0
Isolated mec-10	I.10M	27.38	18	8.33
Isolated mec-10	I.10M	57.14	6.06	14.29
Isolated mec-10	I.10M	51.22	3.57	0
Isolated mec-10	I.10M	25.37	25.64	20
Isolated mec-10	I.10M	27.78	12.9	57.14
Isolated mec-10	I.10M	52.94	20.45	12.5
Isolated mec-10	I.10M	43.24	0	50
Isolated mec-10	I.10M	42.86	4	0
Isolated mec-10	I.10M	92	0	0
Isolated mec-10	I.10M	84.09	0	0
Isolated mec-10	I.10M	52.38	12.5	0
Isolated mec-10	I.10M	73.68	2.78	12.5
Crowded mec-10	G.10M	21.57	24	0
Crowded mec-10	G.10M	28.57	13.51	0
Crowded mec-10	G.10M	23.44	16.28	11.11
Crowded mec-10	G.10M	26.32	7.89	0
Crowded mec-10	G.10M	20.59	15	0
Crowded mec-10	G.10M	38.46	22.22	0
Crowded mec-10	G.10M	45.83	12.5	0
Crowded mec-10	G.10M	38.24	11.63	0
Crowded mec-10	G.10M	53.57	11.11	14.29
Crowded mec-10	G.10M	38.75	30.61	16.67
Crowded mec-10	G.10M	14.61	32	6.67
Crowded mec-10	G.10M	20.9	21.05	11.11
Crowded mec-10	G.10M	47.83	14.63	12.5
Crowded mec-10	G.10M	46.15	32.5	0
Crowded mec-10	G.10M	16.42	6.98	0
Crowded mec-10	G.10M	35.9	22.73	0
Crowded mec-10	G.10M	45.45	8.82	10
Crowded mec-10	G.10M	30.88	24.39	11.11
Crowded mec-10	G.10M	32.31	23.68	20
Crowded mec-10	G.10M	15.19	32	22.22
Crowded mec-10	G.10M	42.65	30	0
Crowded mec-10	G.10M	30.3	34.21	10
Crowded mec-10	G.10M	6.25	29.41	0
Crowded mec-10	G.10M	105.56	7.69	0
Crowded mec-10	G.10M	30.91	32.35	33.33
Crowded mec-10	G.10M	18.84	30.23	10
Crowded mec-10	G.10M	28.36	32.56	0
Crowded mec-10	G.10M	40.35	16.67	0
Crowded mec-10	G.10M	33.33	13.64	20
Crowded mec-10	G.10M	16.88	20.93	0
Isolated degt-1	I.DEGT	31.88	6.38	0
Isolated degt-1	I.DEGT	23.08	12.5	0
Isolated degt-1	I.DEGT	27.27	27.27	0
Isolated degt-1	I.DEGT	31.15	12.24	11.11
Isolated degt-1	I.DEGT	32.88	12	0
Isolated degt-1	I.DEGT	50.75	8.7	0
Isolated degt-1	I.DEGT	63.16	0	20
Isolated degt-1	I.DEGT	70.69	7.5	16.67
Isolated degt-1	I.DEGT	37.5	0	0
Isolated degt-1	I.DEGT	59.32	5.26	14.29
Isolated degt-1	I.DEGT	57.78	3.23	0
Isolated degt-1	I.DEGT	87.72	0	16.67
Isolated degt-1	I.DEGT	38.46	6.12	0
Isolated degt-1	I.DEGT	25	45	0
Isolated degt-1	I.DEGT	34.94	24	8.33
Isolated degt-1	I.DEGT	35	15.79	14.29
Isolated degt-1	I.DEGT	41.03	7.41	0
Isolated degt-1	I.DEGT	54.35	0	0
Isolated degt-1	I.DEGT	45	4.35	20
Isolated degt-1	I.DEGT	64.29	21.05	0
Isolated degt-1	I.DEGT	70.37	19.51	25
Isolated degt-1	I.DEGT	55.38	23.81	0
Isolated degt-1	I.DEGT	52.38	13.51	0
Isolated degt-1	I.DEGT	52.78	7.14	0
Croded degt-1	G.DEGT	31.48	47.06	0
Croded degt-1	G.DEGT	57.38	17.5	0
Croded degt-1	G.DEGT	73.58	5.41	0
Croded degt-1	G.DEGT	41.77	24.07	0
Croded degt-1	G.DEGT	60.38	8.11	33.33
Croded degt-1	G.DEGT	85.45	2.78	0
Croded degt-1	G.DEGT	66.13	7.5	0
Croded degt-1	G.DEGT	78.43	26.47	0
Croded degt-1	G.DEGT	51.92	13.16	0
Croded degt-1	G.DEGT	41.54	17.07	0
Croded degt-1	G.DEGT	25.64	18.18	0
Croded degt-1	G.DEGT	58.18	22.86	0
Croded degt-1	G.DEGT	86.67	16.67	14.29
Croded degt-1	G.DEGT	44.26	10.53	0
Croded degt-1	G.DEGT	33.33	10.53	16.67
Croded degt-1	G.DEGT	75.41	8.82	0
Croded degt-1	G.DEGT	27.54	15.56	0
Croded degt-1	G.DEGT	31.03	5	20
Croded degt-1	G.DEGT	25.81	10	0
Croded degt-1	G.DEGT	42.62	14.71	0
Croded degt-1	G.DEGT	54.41	24.39	9.09
Croded degt-1	G.DEGT	38.89	29.55	0
Croded degt-1	G.DEGT	86.89	19.51	0
Croded degt-1	G.DEGT	69.81	30.56	0
Croded degt-1	G.DEGT	40.32	35.14	0
Croded degt-1	G.DEGT	57.14	30	0
Croded degt-1	G.DEGT	64.52	35.14	0
Croded degt-1	G.DEGT	50.91	26.32	0
Isolated mec-10;degt-1	I.M10D1	17.65	16.67	11.11
Isolated mec-10;degt-1	I.M10D1	39.13	14.29	0
Isolated mec-10;degt-1	I.M10D1	17.58	45.61	14.29
Isolated mec-10;degt-1	I.M10D1	34.92	26.32	0
Isolated mec-10;degt-1	I.M10D1	25.71	17.39	14.29
Isolated mec-10;degt-1	I.M10D1	35.06	13.04	10
Isolated mec-10;degt-1	I.M10D1	24.36	44	0
Isolated mec-10;degt-1	I.M10D1	16.67	57.89	0
Isolated mec-10;degt-1	I.M10D1	27.69	40	0
Isolated mec-10;degt-1	I.M10D1	10.84	42	7.69
Isolated mec-10;degt-1	I.M10D1	23.81	39.53	0
Isolated mec-10;degt-1	I.M10D1	19.05	49.02	0
Isolated mec-10;degt-1	I.M10D1	21.79	28.57	0
Isolated mec-10;degt-1	I.M10D1	38.57	40	0
Isolated mec-10;degt-1	I.M10D1	19.57	62.5	0
Isolated mec-10;degt-1	I.M10D1	41.54	38.64	16.67
Isolated mec-10;degt-1	I.M10D1	44	31.91	12.5
Isolated mec-10;degt-1	I.M10D1	22.89	31.91	0
Isolated mec-10;degt-1	I.M10D1	40.54	40.91	16.67
Isolated mec-10;degt-1	I.M10D1	31.71	29.09	0
Isolated mec-10;degt-1	I.M10D1	25	11.54	20
Isolated mec-10;degt-1	I.M10D1	60.66	18.6	0
Isolated mec-10;degt-1	I.M10D1	25.42	51.35	0
Isolated mec-10;degt-1	I.M10D1	8.93	23.53	0
Isolated mec-10;degt-1	I.M10D1	39.29	20	0
Isolated mec-10;degt-1	I.M10D1	36.49	27.27	0
Isolated mec-10;degt-1	I.M10D1	21.54	32.61	0
Isolated mec-10;degt-1	I.M10D1	18.42	50	0
Crowded mec-10;degt-1	G.M10D1	55.42	33.33	11.11
Crowded mec-10;degt-1	G.M10D1	56.47	22.81	0
Crowded mec-10;degt-1	G.M10D1	25.64	38	20
Crowded mec-10;degt-1	G.M10D1	35.14	21.57	0
Crowded mec-10;degt-1	G.M10D1	8.51	59.65	6.67
Crowded mec-10;degt-1	G.M10D1	14.67	41.86	0
Crowded mec-10;degt-1	G.M10D1	21.74	26.67	0
Crowded mec-10;degt-1	G.M10D1	21.21	46.34	0
Crowded mec-10;degt-1	G.M10D1	46.15	38.64	16.67
Crowded mec-10;degt-1	G.M10D1	13.64	40.43	28.57
Crowded mec-10;degt-1	G.M10D1	37.14	31.82	0
Crowded mec-10;degt-1	G.M10D1	42.68	54.17	0
Crowded mec-10;degt-1	G.M10D1	5.26	39.13	0
Crowded mec-10;degt-1	G.M10D1	22.97	40.43	0
Crowded mec-10;degt-1	G.M10D1	33.33	40.91	0
Crowded mec-10;degt-1	G.M10D1	39.74	41.82	0
Crowded mec-10;degt-1	G.M10D1	19.28	58.33	0
Crowded mec-10;degt-1	G.M10D1	64.18	35.56	12.5
Crowded mec-10;degt-1	G.M10D1	20.9	31.71	12.5
Crowded mec-10;degt-1	G.M10D1	33.78	38.64	0
Crowded mec-10;degt-1	G.M10D1	35.48	39.02	0
Crowded mec-10;degt-1	G.M10D1	39.34	24.39	12.5
Crowded mec-10;degt-1	G.M10D1	53.85	17.5	12.5
Crowded mec-10;degt-1	G.M10D1	25.35	29.55	0
Crowded mec-10;degt-1	G.M10D1	30.88	47.73	0
Crowded mec-10;degt-1	G.M10D1	39.06	12.5	0
Isolated asic-1;degt-1	I.A1D1	51.95	19.23	0
Isolated asic-1;degt-1	I.A1D1	34.72	12	0
Isolated asic-1;degt-1	I.A1D1	42.42	27.27	0
Isolated asic-1;degt-1	I.A1D1	82.26	13.64	0
Isolated asic-1;degt-1	I.A1D1	54.93	10	20
Isolated asic-1;degt-1	I.A1D1	39.39	0	0
Isolated asic-1;degt-1	I.A1D1	55.56	3.33	0
Isolated asic-1;degt-1	I.A1D1	22.22	17.39	11.11
Isolated asic-1;degt-1	I.A1D1	66.15	7.32	14.29
Isolated asic-1;degt-1	I.A1D1	39.24	19.23	10
Isolated asic-1;degt-1	I.A1D1	32.26	50	0
Isolated asic-1;degt-1	I.A1D1	25	11.54	0
Isolated asic-1;degt-1	I.A1D1	75.76	13.64	50
Isolated asic-1;degt-1	I.A1D1	54.9	35.71	23.08
Isolated asic-1;degt-1	I.A1D1	26.87	39.58	0
Isolated asic-1;degt-1	I.A1D1	44.29	6.38	12.5
Isolated asic-1;degt-1	I.A1D1	16.67	13.64	0
Isolated asic-1;degt-1	I.A1D1	64.1	9.09	16.67
Isolated asic-1;degt-1	I.A1D1	41.67	44.44	0
Isolated asic-1;degt-1	I.A1D1	22.35	28.85	10
Isolated asic-1;degt-1	I.A1D1	14.63	33.33	20
Isolated asic-1;degt-1	I.A1D1	79.45	6.52	0
crowded asic-1;degt-1	G.A1D1	32.69	25	0
crowded asic-1;degt-1	G.A1D1	32.79	33.33	16.67
crowded asic-1;degt-1	G.A1D1	21.31	17.95	0
crowded asic-1;degt-1	G.A1D1	26.79	30.3	0
crowded asic-1;degt-1	G.A1D1	32.2	30.77	0
crowded asic-1;degt-1	G.A1D1	32.84	28.89	16.67
crowded asic-1;degt-1	G.A1D1	24.64	43.59	0
crowded asic-1;degt-1	G.A1D1	33.33	23.81	0
crowded asic-1;degt-1	G.A1D1	28.17	34.88	0
crowded asic-1;degt-1	G.A1D1	37.93	39.02	0
crowded asic-1;degt-1	G.A1D1	9.09	17.39	25
crowded asic-1;degt-1	G.A1D1	50	31.25	0
crowded asic-1;degt-1	G.A1D1	38.3	37.5	0
crowded asic-1;degt-1	G.A1D1	33.85	27.27	16.67
crowded asic-1;degt-1	G.A1D1	21.13	39.02	0
crowded asic-1;degt-1	G.A1D1	43.33	23.81	0
crowded asic-1;degt-1	G.A1D1	27.54	30.23	0
crowded asic-1;degt-1	G.A1D1	45.61	39.02	0
crowded asic-1;degt-1	G.A1D1	6.25	13.64	25
crowded asic-1;degt-1	G.A1D1	30	25	0
crowded asic-1;degt-1	G.A1D1	22.73	40.74	20
crowded asic-1;degt-1	G.A1D1	55.56	7.14	20
crowded asic-1;degt-1	G.A1D1	33.33	12.5	25
Isolates asic-1;mec-10;degt-1	I.A1M10D1	32.08	16.67	12.5
Isolates asic-1;mec-10;degt-1	I.A1M10D1	33.96	11.76	16.67
Isolates asic-1;mec-10;degt-1	I.A1M10D1	51.09	3.57	30
Isolates asic-1;mec-10;degt-1	I.A1M10D1	35.79	14.75	0
Isolates asic-1;mec-10;degt-1	I.A1M10D1	56.82	6.78	9.09
Isolates asic-1;mec-10;degt-1	I.A1M10D1	15.38	44.44	25
Isolates asic-1;mec-10;degt-1	I.A1M10D1	39.29	24.07	0
Isolates asic-1;mec-10;degt-1	I.A1M10D1	17.14	7.69	0
Isolates asic-1;mec-10;degt-1	I.A1M10D1	27.5	19.23	33.33
Isolates asic-1;mec-10;degt-1	I.A1M10D1	20	20.41	0
Isolates asic-1;mec-10;degt-1	I.A1M10D1	12.24	18.18	0
Isolates asic-1;mec-10;degt-1	I.A1M10D1	46.88	19.05	0
Isolates asic-1;mec-10;degt-1	I.A1M10D1	66.67	4.76	0
Isolates asic-1;mec-10;degt-1	I.A1M10D1	21.88	15.79	0
Isolates asic-1;mec-10;degt-1	I.A1M10D1	30	28.57	20
Isolates asic-1;mec-10;degt-1	I.A1M10D1	44.19	14.29	20
Isolates asic-1;mec-10;degt-1	I.A1M10D1	73.53	10.53	20
Isolates asic-1;mec-10;degt-1	I.A1M10D1	56.76	4	25
Isolates asic-1;mec-10;degt-1	I.A1M10D1	53.49	8.33	28.57
Isolates asic-1;mec-10;degt-1	I.A1M10D1	35.14	48	50
Isolates asic-1;mec-10;degt-1	I.A1M10D1	21.21	9.52	0
crowded asic-1;mec-10;degt-1	G.A1M10D1	18.48	45.1	6.67
crowded asic-1;mec-10;degt-1	G.A1M10D1	19	35.09	0
crowded asic-1;mec-10;degt-1	G.A1M10D1	26.47	33.33	0
crowded asic-1;mec-10;degt-1	G.A1M10D1	51.16	11.54	50
crowded asic-1;mec-10;degt-1	G.A1M10D1	29.55	18.75	0
crowded asic-1;mec-10;degt-1	G.A1M10D1	17.39	36.59	0
crowded asic-1;mec-10;degt-1	G.A1M10D1	24	65.96	11.11
crowded asic-1;mec-10;degt-1	G.A1M10D1	96.88	8.7	0
crowded asic-1;mec-10;degt-1	G.A1M10D1	62.67	34.09	9.09
crowded asic-1;mec-10;degt-1	G.A1M10D1	61.54	10.81	33.33
crowded asic-1;mec-10;degt-1	G.A1M10D1	27.37	36.67	30
crowded asic-1;mec-10;degt-1	G.A1M10D1	109.38	7.32	0
crowded asic-1;mec-10;degt-1	G.A1M10D1	17.19	62.16	0
crowded asic-1;mec-10;degt-1	G.A1M10D1	37.5	33.33	20
crowded asic-1;mec-10;degt-1	G.A1M10D1	30.43	28.57	0
crowded asic-1;mec-10;degt-1	G.A1M10D1	40.63	19.05	20
crowded asic-1;mec-10;degt-1	G.A1M10D1	43.75	44.44	12.5
crowded asic-1;mec-10;degt-1	G.A1M10D1	27.03	15.56	0
crowded asic-1;mec-10;degt-1	G.A1M10D1	46.88	8.33	0
crowded asic-1;mec-10;degt-1	G.A1M10D1	30.88	23.26	0
crowded asic-1;mec-10;degt-1	G.A1M10D1	31.17	26.09	0
crowded asic-1;mec-10;degt-1	G.A1M10D1	28.57	34.78	14.29
crowded asic-1;mec-10;degt-1	G.A1M10D1	4.35	28.57	0
Isolated asic-1	I.A1	66.13	13.16	12.5
Isolated asic-1	I.A1	36.36	11.76	16.67
Isolated asic-1	I.A1	24.14	6.67	0
Isolated asic-1	I.A1	12.12	44.68	0
Isolated asic-1	I.A1	29.55	11.32	0
Isolated asic-1	I.A1	35.9	29.17	0
Isolated asic-1	I.A1	116.67	0	16.67
Isolated asic-1	I.A1	25.71	4.55	0
Isolated asic-1	I.A1	52.38	32.43	0
Isolated asic-1	I.A1	69.84	10.26	12.5
Isolated asic-1	I.A1	48.28	6.67	20
Isolated asic-1	I.A1	19.23	14.29	0
Isolated asic-1	I.A1	13.11	43.9	0
Isolated asic-1	I.A1	16.67	42.86	0
Isolated asic-1	I.A1	47.06	20	0
Isolated asic-1	I.A1	52.94	57.89	0
Isolated asic-1	I.A1	77.19	16.67	16.67
Isolated asic-1	I.A1	60.56	16.67	22.22
Isolated asic-1	I.A1	27.78	13.04	0
Isolated asic-1	I.A1	30.3	10	0
Isolated asic-1	I.A1	40.32	20.51	11.11
Isolated asic-1	I.A1	27.27	12	0
Isolated asic-1	I.A1	23.33	11.76	0
Isolated asic-1	I.A1	39.19	6.67	10
Isolated asic-1	I.A1	67.86	0	0
Crowded asic-1	G.A1	25	33.33	20
Crowded asic-1	G.A1	12	64.71	0
Crowded asic-1	G.A1	36.67	12.82	12.5
Crowded asic-1	G.A1	16.92	10.53	0
Crowded asic-1	G.A1	44.74	0	0
Crowded asic-1	G.A1	12	45.83	0
Crowded asic-1	G.A1	25.81	48.84	0
Crowded asic-1	G.A1	20	33.33	16.67
Crowded asic-1	G.A1	12.5	25	0
Crowded asic-1	G.A1	36.84	2.63	16.67
Crowded asic-1	G.A1	10.94	8.11	11.11
Crowded asic-1	G.A1	42.11	4.17	0
Crowded asic-1	G.A1	12.82	34	0
Crowded asic-1	G.A1	24.14	8.82	0
Crowded asic-1	G.A1	34.21	38.3	0
Crowded asic-1	G.A1	15.15	40.91	0
Crowded asic-1	G.A1	38.24	38.1	0
Crowded asic-1	G.A1	18.75	31.03	0
Crowded asic-1	G.A1	8.2	35.14	11.11
Crowded asic-1	G.A1	18.67	30.43	10
Crowded asic-1	G.A1	13.75	35.29	0
Crowded asic-1	G.A1	5.71	33.33	0
Isolated asic-1;mec-10	I.A1M10	52.46	8.57	9.09
Isolated asic-1;mec-10	I.A1M10	71.43	11.76	0
Isolated asic-1;mec-10	I.A1M10	22.92	46.43	0
Isolated asic-1;mec-10	I.A1M10	34.38	28.57	0
Isolated asic-1;mec-10	I.A1M10	25	5.13	0
Isolated asic-1;mec-10	I.A1M10	14.89	0	12.5
Isolated asic-1;mec-10	I.A1M10	38.67	10.87	9.09
Isolated asic-1;mec-10	I.A1M10	36.36	9.52	0
Isolated asic-1;mec-10	I.A1M10	60.71	21.05	0
Isolated asic-1;mec-10	I.A1M10	46.67	9.3	16.67
Isolated asic-1;mec-10	I.A1M10	27.42	23.81	0
Isolated asic-1;mec-10	I.A1M10	55.26	8.33	0
Isolated asic-1;mec-10	I.A1M10	66.67	23.08	0
Isolated asic-1;mec-10	I.A1M10	70.91	11.11	0
Isolated asic-1;mec-10	I.A1M10	54.29	0	14.29
Isolated asic-1;mec-10	I.A1M10	60.66	21.05	0
Isolated asic-1;mec-10	I.A1M10	25	9.09	0
Isolated asic-1;mec-10	I.A1M10	62.96	3.13	0
Isolated asic-1;mec-10	I.A1M10	33.33	4.76	0
Isolated asic-1;mec-10	I.A1M10	52.5	4.35	28.57
Isolated asic-1;mec-10	I.A1M10	36.17	15.52	16.67
Isolated asic-1;mec-10	I.A1M10	64.81	14.71	0
Isolated asic-1;mec-10	I.A1M10	22.22	9.52	8.33
Isolated asic-1;mec-10	I.A1M10	62.71	4.88	0
Isolated asic-1;mec-10	I.A1M10	42.11	9.52	0
Isolated asic-1;mec-10	I.A1M10	80.85	20	16.67
Isolated asic-1;mec-10	I.A1M10	82.22	28.57	0
Isolated asic-1;mec-10	I.A1M10	56.25	4.76	25
Isolated asic-1;mec-10	I.A1M10	64.18	23.26	0
Isolated asic-1;mec-10	I.A1M10	51.52	0	20
Isolated asic-1;mec-10	I.A1M10	66.67	13.64	0
Crowded asic-1;mec-10	G.A1M10	59.57	17.65	0
Crowded asic-1;mec-10	G.A1M10	0	47.62	0
Crowded asic-1;mec-10	G.A1M10	8.57	52.17	0
Crowded asic-1;mec-10	G.A1M10	18.97	63.89	0
Crowded asic-1;mec-10	G.A1M10	37.5	22.86	0
Crowded asic-1;mec-10	G.A1M10	19.23	41.46	0
Crowded asic-1;mec-10	G.A1M10	63.64	52.38	20
Crowded asic-1;mec-10	G.A1M10	29.69	67.57	18.18
Crowded asic-1;mec-10	G.A1M10	37.5	48.65	0
Crowded asic-1;mec-10	G.A1M10	34.38	18.42	0
Crowded asic-1;mec-10	G.A1M10	7.89	57.89	0
Crowded asic-1;mec-10	G.A1M10	13.56	33.33	0
Crowded asic-1;mec-10	G.A1M10	14.29	38.46	0
Crowded asic-1;mec-10	G.A1M10	14.71	38.1	0
Crowded asic-1;mec-10	G.A1M10	28.57	28.57	0
Crowded asic-1;mec-10	G.A1M10	33.33	18.75	20
Crowded asic-1;mec-10	G.A1M10	30.65	38.1	12.5
Crowded asic-1;mec-10	G.A1M10	8.51	20	0
Crowded asic-1;mec-10	G.A1M10	30.77	57.14	20
Crowded asic-1;mec-10	G.A1M10	23.68	54.55	16.67
Crowded asic-1;mec-10	G.A1M10	37.5	31.58	0
Crowded asic-1;mec-10	G.A1M10	21.67	26.19	0
Crowded asic-1;mec-10	G.A1M10	22.39	55	0
Crowded asic-1;mec-10	G.A1M10	19.05	38.1	22.22
Crowded asic-1;mec-10	G.A1M10	24.62	25	0
Crowded asic-1;mec-10	G.A1M10	6.67	26.32	0
Crowded asic-1;mec-10	G.A1M10	100	5.26	0
Crowded asic-1;mec-10	G.A1M10	62.75	41.67	0
Crowded asic-1;mec-10	G.A1M10	49.18	35.9	14.29
Crowded asic-1;mec-10	G.A1M10	35.14	15	33.33

## Sheet: Statistics harsh touch FIG.4A
			N2	asic-1	mec-10	degt-1	asic-1;mec-10	mec-10;degt-1	asic-1;degt-1	asic-1;mec-10;degt-1
	% of responding worms	crowded worms	84.375	82.7586	39	68	92.3077	37.5	85.7143	29
		isolated eggs	40.625	82.6087	35	35	87.5	25	79.4118	44
		Fisher exact test, P-value	0.00062833	0.296379	0.629331	0.0141958	0.711872	0.324154	0.540091	0.522787
																osm-6 (>0)
											`					62
																26
																	N2	asic-1	mec-10	degt-1	unc-8	del-1	gtl-1
																crowded worms	84.375	82.7586	39	68	11	61.2903	74
																isolated eggs	40.625	82.6087	35	35	0	55.5556	44
															SE.p	crowded worms	6.41779	7.01423	7.92916	7.69573	11.2772	8.74834	8.44152
												8				isolated eggs	8.68224	7.90319	8.59326	8.59326	0	9.56304	9.92774
			Habituation
			WT- kaede	kaede;mec-4		mec-4 (e1611)											mec-10;asic-1 GFP
		crowded worms	3.63	4.36		2.35
		isolated eggs	2.22	1.11		1.05
		SE
		crowded worms	0.34	0.38		0.32
		isolated eggs	0.31	0.25		0.29
		WT- kaede					kaede;mec-4		mec-4		degt-1				mec-10		kaede;asic-1		asic-1;mec-10					asic-1;mec-10
		crowded	isolated				crowded	isolated	crowded	isolated	crowded	isolated			crowded	isolated	crowded	isolated	crowded	isolated			isolated	crowded	isolated
	response	35	17				15	7	30	10	25	11			15	11	39	28	20	22			17.3333	14.3333	11.3333
	no response	7	13				2	11	9	21	12	20			23	20	7	2	1	2			1.66667	1.66667	1.66667
	mec-10
	response	15	11
	no response	23	20															N2	asic-1	mec-10	degt-1	asic-1;mec-10	mec-10;degt-1	asic-1;degt-1	asic-1;mec-10;degt-1
																	crowded worms	84.375	82.7586	39	68	92.3077	37.5	85.7143	28.8462
																	isolated eggs	40.625	82.6087	35	35	87.5	25	79.4118	44
																	SE.p
		Fisher's Exact Test for Count Data															crowded worms	6.41779	7.01423	7.92916	7.69573	4.26634	7.65466	5.91559	6.28288
																	isolated eggs	8.68224	7.90319	8.59326	8.59326	5.22913	7.21688	6.93468	7.01997
	WT-K vs. mec-10 crowded	data: m				WT-K vs. asic-1 isolated
		p-value = 6.921e-05					Fisher's Exact Test for Count Data
		alternative hypothesis: true odds ratio is not equal to 1
		95 percent confidence interval:					data: m
		2.452317 25.330487					p-value = 0.002129
		sample estimates:					alternative hypothesis: true odds ratio is not equal to 1
		odds ratio					95 percent confidence interval:
		7.44389					0.00952198 0.50763872
							sample estimates:
		> b<-c(17,13,11,20)					odds ratio
		> n<-matrix(b,2,2)					0.0971575
		> fisher.test(n)
		Fisher's Exact Test for Count Data				WT-K vs. asic-1;mec-10 isolated
							Fisher's Exact Test for Count Data
	isolated	data: n
		p-value = 0.1261					data: m
		alternative hypothesis: true odds ratio is not equal to 1					p-value = 0.005642
		95 percent confidence interval:					alternative hypothesis: true odds ratio is not equal to 1
		0.7555396 7.5750705					95 percent confidence interval:
		sample estimates:					0.01194278 0.65734769
		odds ratio					sample estimates:
		2.34306					odds ratio
							0.123453
