# Supplementary material for: Sensory experience controls dendritic structure and behavior by distinct pathways involving degenerins
Source: eLife. 2025 Jan 10;14:e83973. doi: 10.7554/eLife.83973 (PMC11756856; doi:10.7554/eLife.83973)
Supplement: Figure 5—figure supplement 1—source data 1. [file elife-83973-fig5-figsupp1-data1.xlsx]

## Sheet: Figure 5 Figure supp. 1, A+B+C
		Isolated EtOH					Isolated ATR
			ectopic/non-ectopic branches	% straight				ectopic/non-ectopic branches	% straight
			0.285714	20				0.264368	40
			0.260417	19.6429				0.48	24.1379
			0.5	9.67742				0.468085	17.2414
			0.320755	11.1111				0.565217	28
			0.723404	0				0.511111	14
			0.210526	8.82353				0.34	40.625
			0.454545	39.3939				0.210526	24.0741
			0.344828	12.5				0.238095	30.7692
			0.234043	60.7143
			0.25	24.1379
		Average	0.358423	20.6001			Average	0.384675	27.356
		Standard error	0.0503422	5.59182			Standard error	0.0487173	3.40645
			ectopic/non-ectopic branches	standard error
		Isolated EtOH	0.358423	0.0503422
		Isolated ATR	0.384675	0.0487173
			% straight quaternary branches	standard error
		Isolated EtOH	20.6001	5.59182
		Isolated ATR	27.356	3.40645
