# Supplementary material for: Sensory experience controls dendritic structure and behavior by distinct pathways involving degenerins
Source: eLife. 2025 Jan 10;14:e83973. doi: 10.7554/eLife.83973 (PMC11756856; doi:10.7554/eLife.83973)
Supplement: Figure 5—source data 1. [file elife-83973-fig5-data1.xlsx]

## Sheet: DEG expression in the PVD
													Worm	Cell body	1 order	2 order	3 order	4 order	Axon
Worm	Cell body	1 order	2 order	3 order	4 order	Axon		AQ3273 MEC-10::mCherry					Grouped MEC-10																								Grouped DEGT-1											Isolated DEGT-1
1	2	+	0	0	0	1		01-03-2017 Isolated 1	1				3	2	1	0	0	0	1		08-03-2017 Grouped 1	3				2	0	0	0	0	1		01-03-2017 Isolated 1				2	1	0	0	0	1		05-01-2017 Grouped 3					2
2	2	2	2	2	2	2		01-03-2017 Isolated 2	2				7	2	1	1	1	1	1		12-03-2017 Grouped 1	7				2	2	2	2	2	2		01-03-2017 Isolated 2				1	0	0	0	0	0		05-01-2017 Grouped 4					1
3	2	1	0	0	0	1		08-03-2017 Grouped 1	3				8	2	2	2	2	2	0		12-03-2017 Grouped 2	8				2	2	2	2	2	2		08-03-2017 Isolated 1				2	2	1	1	1	2		05-01-2017 Grouped 5					2
4	2	2	2	2	2	2		08-03-2017 Isolated 1	4				11	1	0	0	0	0	0		12-03-2017 Grouped 3	11				2	2	2	2	2	2		09-03-2017 Isolated 1				1	1	0	0	0	1		11-01-2017 Grouped 1					2
5	2	2	2	2	2	2		09-03-2017 Isolated 1	5				13	2	1	1	1	1	2		12-03-2017 Grouped 4	13				2	1	1	1	1	1		09-03-2017 Isolated 2				1	1	0	1	1	1		11-01-2017 Grouped 2					2
6	2	1	1	1	1	1		09-03-2017 Isolated 2	6				14	2	2	2	2	2	-		12-03-2017 Grouped 5	14				2	1	0	0	0	0		12-03-2017 Isolated 1				1	0	0	0	0	1		11-01-2017 Grouped 3					2
7	2	1	1	1	1	1		12-03-2017 Grouped 1	7				15	2	1	1	1	1	2		12-03-2017 Grouped 6	15				1	1	0	0	0	0		12-03-2017 Isolated 2				2	2	2	2	2	2		11-01-2017 Grouped 4					2
8	2	2	2	2	2	0		12-03-2017 Grouped 2	8				17	2	2	2	2	2	2		12-03-2017 Grouped 7	17				2	0	0	0	0	0		12-03-2017 Isolated 3				2	1	0	1	1	1		11-01-2017 Grouped 5					2
9	2	1	0	0	0	0		12-03-2017 Isolated 1	9				18	2	2	1	1	1	2		12-03-2017 Grouped 8	18				2	2	1	1	1	2		12-03-2017 Isolated 4				2	1	0	0	0	0		11-01-2017 Grouped 6					0
10	1	1	0	0	0	0		12-03-2017 Isolated 2	10				19	2	2	1	1	1	2		12-03-2017 Grouped 9	19				2	0	0	0	0	0		15-03-2017 Isolated 1				2	1	0	0	0	0		11-01-2017 Grouped 7					0
11	1	0	0	0	0	0		12-03-2017 Grouped 3	11				22	2	2	2	2	2	2		15-03-2017 Grouped 1	22				2	2	2	2	2	2		15-03-2017 Isolated 2				2	1	1	1	1	1		15-01-2017 Grouped 1					0
12	2	0	0	0	0	0		12-03-2017 Isolated 3	12																	0	0	0	0	0	0		15-03-2017 Isolated 3				1	0	0	0	0	0		15-01-2017 Grouped 2					0
13	2	1	1	1	1	2		12-03-2017 Grouped 4	13				23	2	1	0	0	0	1		15-03-2017 Grouped 2	23				2	1	1	1	1	0		15-03-2017 Isolated 4				1	1	1	0	0	0		26-03-2017 Grouped 1					0
14	2	2	2	2	2	-		12-03-2017 Grouped 5	14				25	2	2	0	1	1	2		15-03-2017 Grouped 3	25				2	1	0	0	0	0		15-03-2017 Isolated 5				2	1	1	1	1	0		26-03-2017 Grouped 2					1
15	2	1	1	1	1	2		12-03-2017 Grouped 6	15				26	2	2	1	1	1	2		15-03-2017 Grouped 4	26				2	0	0	0	0	0		22-01-2017 Isolated 1				1	0	0	0	0	0		26-03-2017 Grouped 3					0
16	2	2	1	1	1	2		12-03-2017 Isolated 4	16				29	2	1	1	1	1	0		22-01-2017 Grouped 1	29				-	2	2	2	2	-		22-01-2017 Isolated 2				0	0	0	0	0	0		26-03-2017 Grouped 4					2
17	2	2	2	2	2	2		12-03-2017 Grouped 7	17				30	2	1	0	0	0	2		22-01-2017 Grouped 2	30				-	2	2	2	2	2		22-01-2017 Isolated 3				1	0	0	0	0	0		26-03-2017 Grouped 5					0
18	2	2	1	1	1	2		12-03-2017 Grouped 8	18				33	2	1	1	1	1	2		22-01-2017 Grouped 3	33				2	1	0	0	0	0		23-03-2017 Isolated 1				0	0	0	0	0	0		26-03-2017 Grouped 6					0
19	2	2	1	1	1	2		12-03-2017 Grouped 9	19				34	1	1	0	1	0	2		22-01-2017 Grouped 4	34				2	2	0	1	0	2		23-03-2017 Isolated 2				0	0	0	0	0	0		26-03-2017 Grouped 7					0
20	2	0	0	0	0	0		15-03-2017 Isolated 1	20				38	2	2	1	1	1	2		23-03-2017 Grouped 1	38				2	2	0	1	1	2		23-03-2017 Isolated 3				1	1	0	0	0	1		26-03-2017 Grouped 8					0
21	2	2	2	2	2	2		15-03-2017 Isolated 2	21				39	2	1	1	1	1	2		23-03-2017 Grouped 2	39				2	0	0	0	0	0		26-01-2017 Isolated 1				1	0	0	0	0	1		26-03-2017 Grouped 9					2
22	2	2	2	2	2	2		15-03-2017 Grouped 1	22				40		2	2	2	2	2		23-03-2017 Grouped 3	40				1	0	0	0	0	0		26-01-2017 Isolated 2				0	0	0	0	0	0		26-03-2017 Grouped 10
													42	2	2	1	2	1	2		23-03-2017 Grouped 4	42				2	1	0	0	0	1		26-01-2017 Isolated 3				1	1	0	0	0	1		20-01-2017 Grouped 1
23	2	1	0	0	0	1		15-03-2017 Grouped 2	23				43	-	2	1	2	2	2		23-03-2017 Grouped 5	43				2	1	1	1	1	2		26-01-2017 Isolated 4				1	0	0	0	0	1		29-03-2017 Grouped 1
24	0	0	0	0	0	0		15-03-2017 Isolated 3	24				44	2	2	1	1	1	2		26-01-2017 Grouped 1	44				2	2	2	2	2	2		26-01-2017 Isolated 5				1	1	0	1	0	1		29-03-2017 Grouped 2
25	2	2	0	1	1	2		15-03-2017 Grouped 3	25				47	2	1	1	1	1	2		26-01-2017 Grouped 2	47				2	1	0	0	0	1		26-01-2017 Isolated 6				1	1	0	0	0	0		29-03-2017 Grouped 3
26	2	2	1	1	1	2		15-03-2017 Grouped 4	26				48	2	1	0	1	1	1		26-01-2017 Grouped 3	48				2	1	0	0	0	1		26-01-2017 Isolated 7				0	0	0	0	0	0		29-03-2017 Grouped 4
27	2	1	1	1	1	0		15-03-2017 Isolated 4	27				51	2	1	0	1	0	1		26-01-2017 Grouped 4	51															1	0	0	0	0	0		29-03-2017 Grouped 5
28	2	1	0	0	0	0		15-03-2017 Isolated 5	28				52	2	1	0	1	1	1		26-01-2017 Grouped 5	52															0	0	0	0	0	0		29-03-2017 Grouped 6
29	2	1	1	1	1	0		22-01-2017 Grouped 1	29				55	2	2	2	2	2	2		26-01-2017 Grouped 7	55															1	0	0	0	0	1		29-03-2017 Grouped 7
30	2	1	0	0	0	2		22-01-2017 Grouped 2	30				56	2	2	1	2	2	1		26-01-2017 Grouped 8	56															2	1	1	1	1	1		29-03-2017 Grouped 8
31	2	0	0	0	0	0		22-01-2017 Isolated 1	31				57	2	1	1	1	1	1		26-01-2017 Grouped 9	57															1	1	0	0	0	0		29-03-2017 Grouped 9
Worm	Cell body	1 order	2 order	3 order	4 order	Axon																				Cell body	1 order	2 order	3 order	4 order	Axon						2	1	0	0	0	1		29-03-2017 Grouped 10
32	-	2	2	2	2	-		22-01-2017 Isolated 2	32					Cell body	1 order	2 order	3 order	4 order	Axon																		Cell body	1 order	2 order	3 order	4 order	Axon							Cell body
33	2	1	1	1	1	2		22-01-2017 Grouped 3	33			Avg		1.93103	1.45161	0.903226	1.16129	1.06452	1.53333					Avg		1.84	1.11111	0.666667	0.740741	0.703704	0.961538				Avg		1.09375	0.59375	0.21875	0.28125	0.25	0.53125					Avg		0.952381
34	1	1	0	1	0	2		22-01-2017 Grouped 4	34			Count		29	31	31	31	31	30					Count		25	27	27	27	27	26				Count		33	33	33	33	33	33					Count		21
35	-	2	2	2	2	2		22-01-2017 Isolated 3	35			>0		29	30	22	27	25	27					>0		24	20	11	13	12	15				>0		27	18	6	8	7	16					>0		11
36	2	1	0	0	0	0		23-03-2017 Isolated 1	36			% expression		100	96.7742	70.9677	87.0968	80.6452	90				% expression			96	74.0741	40.7407	48.1481	44.4444	57.6923			% expression			81.8182	54.5455	18.1818	24.2424	21.2121	48.4848				% expression			52.381
37	2	2	0	1	0	2		23-03-2017 Isolated 2	37
38	2	2	1	1	1	2		23-03-2017 Grouped 1	38
39	2	1	1	1	1	2		23-03-2017 Grouped 2	39
40	-	2	2	2	2	2		23-03-2017 Grouped 3	40						MEC-10																					DEGT-1
41	2	2	0	1	1	2		23-03-2017 Isolated 3	41							Cell body	Quaternaries	Axon																			Cell body	Quaternaries	Axon
42	2	2	1	2	1	2		23-03-2017 Grouped 4	42						Crowded	100	80.6452	90																		Crowded worms	81.8182	21.2121	48.4848
43	-	2	1	2	2	2		23-03-2017 Grouped 5	43						Isolated	96	44.4444	57.6923																		Isolated eggs	52.381	28.5714	28.5714
44	2	2	1	1	1	2		26-01-2017 Grouped 1	44
45	2	0	0	0	0	0		26-01-2017 Isolated 1	45
46	1	0	0	0	0	0		26-01-2017 Isolated 2	46																																					Fisher's Exact Test for Count Data CB
47	2	1	1	1	1	2		26-01-2017 Grouped 2	47																																					CB
48	2	1	0	1	1	1		26-01-2017 Grouped 3	48																																					data: b
49	2	1	0	0	0	1		26-01-2017 Isolated 3	49																																					p-value = 0.03235
50	2	1	1	1	1	2		26-01-2017 Isolated 4	50																																					alternative hypothesis: true odds ratio is not equal to 1
51	2	1	0	1	0	1		26-01-2017 Grouped 4	51																																					95 percent confidence interval:
52	2	1	0	1	1	1		26-01-2017 Grouped 5	52			Fisher's Exact Test				Fisher's Exact Test for Count Data Axon										MEC-10	DEGT-1																			1.019909 17.013794
53	2	2	2	2	2	2		26-01-2017 Isolated 5	53																Crowded worms	80.6452	21.2121																			sample estimates:
54	2	2	2	2	2	2		26-01-2017 Grouped 6	54			p-value = 0.006166				p-value = 0.01159									Isolated eggs	44.4444	28.5714																			odds ratio
55	2	2	2	2	2	2		26-01-2017 Grouped 7	55																																					3.97361
56	2	2	1	2	2	1		26-01-2017 Grouped 8	56
57	2	1	1	1	1	1		26-01-2017 Grouped 9	57
58	2	1	0	0	0	1		26-01-2017 Isolated 6	58
59	2	1	0	0	0	1		26-01-2017 Isolated 7	59
Worm	Cell body	1 order	2 order	3 order	4 order	Axon		AQ3272 DEGT-1::mCherry								6.36949
								Worm	Allocated number
60	2	2	2	2	2	0		05-01-2017 Isolated 1	60
61	1	1	1	1	1	1		05-01-2017 Isolated 5	61
62	2	1	0	0	0	1		05-01-2017 Grouped 3	62
63	1	0	0	0	0	0		05-01-2017 Grouped 4	63
64	2	1	0	1	1	2		05-01-2017 Isolated 6	64
65	2	2	0	0	0	0		05-01-2017 Isolated 7	65
66	2	1	1	0	0	1		05-01-2017 Isolated 8	66
67	2	2	1	1	1	2		05-01-2017 Grouped 5	67
68	1	1	0	0	0	1		11-01-2017 Grouped 1	68
69	1	1	0	1	1	1		11-01-2017 Grouped 2	69
70	1	0	0	0	0	1		11-01-2017 Grouped 3	70
71	2	1	0	0	0	0		11-01-2017 Isolated 1	71
72	2	1	1	1	1	2		11-01-2017 Isolated 2	72
73	2	1	0	0	0	0		11-01-2017 Isolated 3	73
74	2	2	2	2	2	2		11-01-2017 Grouped 4	74
75	2	1	0	1	1	1		11-01-2017 Grouped 5	75
76	2	1	0	0	0	0		11-01-2017 Grouped 6	76
77	2	1	0	0	0	0		11-01-2017 Grouped 7	77
78	2	1	1	1	1	1		15-01-2017 Grouped 1	78
79	1	0	0	0	0	0		15-01-2017 Grouped 2	79
80	0	0	0	0	0	0		26-03-2017 Isolated 1	80
81	0	0	0	0	0	0		26-03-2017 Isolated 2	81
82	0	0	0	0	0	0		26-03-2017 Isolated 3	82
83	1	1	1	0	0	0		26-03-2017 Grouped 1	83
84	2	1	1	1	1	0		26-03-2017 Grouped 2	84
85	1	0	0	0	0	0		26-03-2017 Grouped 3	85
86	0	0	0	0	0	0		26-03-2017 Isolated 4	86
87	0	0	0	0	0	0		26-03-2017 Isolated 5	87
88	0	0	0	0	0	0		26-03-2017 Grouped 4	88
89	1	0	0	0	0	0		26-03-2017 Grouped 5	89
90	0	0	0	0	0	0		26-03-2017 Grouped 6	90
91	0	0	0	0	0	0		26-03-2017 Grouped 7	91
92	1	1	0	0	0	1		26-03-2017 Grouped 8	92
93	1	0	0	0	0	1		26-03-2017 Grouped 9	93
94	0	0	0	0	0	0		26-03-2017 Grouped 10	94
95	1	1	0	0	0	1		20-01-2017 Grouped 1	95
96								20-01-2017 Isolated 1	96
97	1	0	0	0	0	1		29-03-2017 Grouped 1	97
98	1	1	0	1	0	1		29-03-2017 Grouped 2	98
99	1	1	0	0	0	0		29-03-2017 Grouped 3	99
100	1	0	0	0	0	0		29-03-2017 Isolated 1	100
101	0	0	0	0	0	0		29-03-2017 Isolated 2	101
102	0	0	0	0	0	0		29-03-2017 Grouped 4	102
103	1	0	0	0	0	0		29-03-2017 Grouped 5	103
104	2	1	1	1	1	1		29-03-2017 Isolated 3	104
105	0	0	0	0	0	0		29-03-2017 Isolated 4	105
106	0	0	0	0	0	0		29-03-2017 Grouped 6	106
107	1	0	0	0	0	1		29-03-2017 Grouped 7	107
108	2	1	1	1	1	1		29-03-2017 Grouped 8	108
109	0	0	0	0	0	0		29-03-2017 Isolated 5	109
110	0	0	0	0	0	0		29-03-2017 Isolated 6	110
111	0	1	0	0	0	0		29-03-2017 Isolated 7	111
112	1	1	0	0	0	0		29-03-2017 Grouped 9	112
113	2	1	0	0	0	1		29-03-2017 Grouped 10	113
114	2	2	2	2	2	2		29-03-2017 Isolated 8	114
Worm	Cell body	1 order	2 order	3 order	4 order	Axon
BP1031 degt-1;MEC-10;mCherry								BP1031
115	1	1	0	0	0	0		25-05-2017 Grouped 1	115
116	1	0	0	0	0	0		25-05-2017 Isolated 1	116
117	0	0	0	0	0	0		25-05-2017 Grouped 2	117
118	1	1	0	0	0	0		01-06-2017 Grouped 1	118
119	2	1	1	1	0	0		01-06-2017 Isolated 1	119
120	1	1	0	0	0	1		01-06-2017 Grouped 2	120
121	1	1	1	1	1	1		01-06-2017 Grouped 3	121
122	1	0	0	0	0	0		01-06-2017 Isolated 2	122
123	2	1	1	0	0	1		01-06-2017 Isolated 3	123
124	0	0	0	0	0	0		01-06-2017 Grouped 4	124
125	0	0	0	0	0	0		01-06-2017 Grouped 5	125
126	1	1	0	0	0	0		01-06-2017 Isolated 4	126
127	0	0	0	0	0	0		01-06-2017 Grouped 6	127
128	0	0	0	0	0	0		01-06-2017 Grouped 7	128
129	1	1	0	0	0	0		01-06-2017 Isolated 5	129
130	0	0	0	0	0	0		01-06-2017 Isolated 6	130
131	0	0	0	0	0	0		01-06-2017 Isolated 7	131
132	2	1	0	0	0	1		01-06-2017 Grouped 8	132
133	2	1	0	0	0	0		01-06-2017 Isolated 8	133
134	1	1	0	0	0	1		01-06-2017 Isolated 9	134
135	0	0	0	0	0	0		04-06-2017 Grouped 1	135
136	0	0	0	0	0	0		04-06-2017 Grouped 2	136
137	2	1	0	0	0	0		04-06-2017 Isolated 1	137
138	1	0	0	0	0	0		01-06-2017 Isolated 2	138
139	2	1	1	1	1	2		04-06-2017 Grouped 3	139
140	2	1	0	0	0	1		04-06-2017 Grouped 4	140
141	2	1	1	1	1	1		04-06-2017 Grouped 5	141
142	1	0	0	0	0	1		04-06-2017 Isolated 3	142
143	2	1	0	0	0	1		04-06-2017 Isolated 4	143
144	1	0	0	0	0	1		04-06-2017 Isolated 5	144
145	1	0	0	0	0	0		04-06-2017 Grouped 6	145
146	1	1	1	1	0	1		04-06-2017 Grouped 7	146
147	2	1	1	1	1	2		04-06-2017 Grouped 8	147
148	1	0	0	0	0	1		04-06-2017 Grouped 9	148
149	0	0	0	0	0	0		04-06-2017 Isolated 6	149
150	0	0	0	0	0	0		04-06-2017 Isolated 7	150
151	1	1	0	0	0	0		04-06-2017 Isolated 8	151
152	0	0	0	0	0	0		04-06-2017 Grouped 10	152
153	2	1	0	0	0	1		04-06-2017 Grouped 11	153
154	0	0	0	0	0	0		04-06-2017 Isolated 9	154
155	2	1	1	1	0	2		07-06-2017 Isolated 1	155
156	1	0	0	0	0	1		07-06-2017 Isolated 2	156
157	2	1	0	1	0	2		07-06-2017 Isolated 3	157
158	1	1	1	0	0	0		07-06-2017 Grouped 1	158
159	2	1	0	0	0	0		07-06-2017 Grouped 2	159
160	0	0	0	0	0	0		07-06-2017 Grouped 3	160
161	0	0	0	0	0	0		07-06-2017 Grouped 4	161
162	1	0	0	0	0	1		07-06-2017 Grouped 5	162
163	1	1	0	0	0	0		07-06-2017 Grouped 6	163
164	2	2	1	1	1	2		07-06-2017 Grouped 7	164
BP1033 mec-10;DEGT-1;mCherry
Worm	Cell body	1 order	2 order	3 order	4 order	Axon		BP1033
165	2	2	1	0	0	1		02-10-2017 Isolated 1	165
166	1	0	0	0	0	0		02-10-2017 Isolated 2	166
167	1	1	0	0	0	0		02-10-2017 Isolated 3	167
168	1	1	0	0	0	0		02-10-2017 Isolated 4	168
169	1	1	0	0	0	0		02-10-2017 Isolated 5	169
170	1	1	0	1	0	1		02-10-2017 Isolated 6	170
171	1	1	1	1	0	0		02-10-2017 Isolated 7	171
172	1	1	0	0	0	0		12-10-2017 Grouped 1	172
173	0	0	0	0	0	0		12-10-2017 Grouped 2	173
174	1	1	2	2	2	2		12-10-2017 Isolated 1	174
175	0	0	0	2	0	1		12-10-2017 Isolated 2	175
176	1	1	0	0	0	1		12-10-2017 Grouped 3	176
177	1	1	0	0	0	1		12-10-2017 Grouped 4	177
178	1	1	0	0	0	0		12-10-2017 Grouped 5	178
179	2	2	1	2	1	2		12-10-2017 Isolated 3	179
180	1	1	0	0	0	0		12-10-2017 Isolated 4	180
181	1	1	0	0	0	0		12-10-2017 Isolated 5	181
182	0	0	0	0	0	0		12-10-2017 Grouped 6	182
183	0	0	0	0	0	0		12-10-2017 Isolated 6	183
184	2	2	1	2	2	2		12-10-2017 Isolated 7	184
185	1	1	0	0	0	1		12-10-2017 Grouped 7	185
186	1	1	0	1	0	1		12-10-2017 Grouped 8	186
187	1	1	1	0	0	1		12-10-2017 Isolated 8	187
188	2	1	1	1	1	2		12-10-2017 Isolated 9	188
189	2	1	0	1	1	1		12-10-2017 Grouped 9	189
190	1	1	0	0	0	0		12-10-2017 Isolated 10	190
191	0	0	0	0	0	0		12-10-2017 Grouped 10	191
192	1	1	0	0	0	1		15-10-2017 Grouped 1	192
193	1	1	0	0	0	0		15-10-2017 Grouped 2	193
194	1	1	0	0	0	1		15-10-2017 Isolated 1	194
195	1	1	0	0	0	1		15-10-2017 Grouped 3	195
196	0	0	0	0	0	0		15-10-2017 Grouped 4	196
197	2	1	1	0	0	2		15-10-2017 Isolated 2	197
198	1	0	0	0	0	0		15-10-2017 Grouped 5	198
199	2	1	0	1	0	1		15-10-2017 Isolated 3	199
200	0	0	0	0	0	0		15-10-2017 Grouped 6	200
201	0	0	0	0	0	0		15-10-2017 Grouped 7	201
202	2	2	2	2	2	2		15-10-2017 Grouped 8	202
203	2	1	0	1	1	1		19-10-2017 Isolated 1	203
204	1	0	0	0	0	0		19-10-2017 Grouped 1	204
205	1	0	0	0	0	0		19-10-2017 Grouped 2	205
206	2	2	2	2	2	2		19-10-2017 Grouped 3	206
207	2	2	2	2	2	2		19-10-2017 Isolated 2	207
208	1	0	0	0	0	0		19-10-2017 Grouped 4	208
209	0	0	0	0	0	0		19-10-2017 Grouped 5	209
210	1	1	0	0	0	0		19-10-2017 Grouped 6	210
211	2	1	0	0	0	1		19-10-2017 Grouped 7	211
212	0	0	0	0	0	0		19-10-2017 Grouped 8	212
213	1	1	0	1	0	1		19-10-2017 Grouped 9	213
214	2	1	1	1	0	1		19-10-2017 Grouped 10	214
[truncated: 41 more columns]

## Sheet: Figure 5. I
				crowded worms	isolated worms
			% responding	86.6667	45.8333
			standard error of proportion	6.20567	10.1707
					Statistics
					Fisher's Exact Test
					p-value = 0.002617

## Sheet: summary and figures
			Wild type						Mutants
													MEC-10 mCherry
			MEC-10					degt-1;MEC-10::mCherry						Cell body		Quaternaries		Axon
				Cell body	Quaternaries	Axon			Cell body	Quaternaries	Axon			WT	degt-1 mutants	WT	degt-1 mutants	WT	degt-1 mutants
			Crowded worms	100	80.6452	90		Crowded worms	60.8696	13.0435	34.7826		Crowded worms	100	60.8696	80.6452	13.0435	90	34.7826
			Isolated eggs	96	44.4444	57.6923		Isolated eggs	77.2727	0	36.3636		Isolated eggs	96	77.2727	44.4444	0	57.6923	36.3636
													DEGT-1 mCherry
			DEGT-1					mec-10;DEGT-1::mCherry						Cell body		Quaternaries		Axon
				Cell body	Quaternaries	Axon			Cell body	Quaternaries	Axon			WT	mec-10	WT	mec-10	WT	mec-10
			Crowded worms	81.8182	21.2121	48.4848		Crowded worms	71.4286	10.7143	42.8571		Crowded worms	81.8182	71.4286	21.2121	10.7143	48.4848	42.8571
			Isolated eggs	52.381	28.5714	28.5714		Isolated eggs	90.9091	27.2727	59.0909		Isolated eggs	52.381	90.9091	28.5714	27.2727	28.5714	59.0909
			MEC-10::mCherry				MEC-10::mCherry					MEC-10::mCherry
			cell body crowded WT vs crowded degt-1
			Fisher's Exact Test for Count Data				isher's Exact Test for Count Data					Fisher's Exact Test for Count Data
						Quaternaries crowded WT vs crowded degt-1						Crowded Axon WT vs. degt-1
			data: m.cb				data: m.quat					data: m.axon
			p-value = 0.0002221				p-value = 1.081e-06					p-value = 3.5e-07
							MEC-10::mCherry				DEGT-1::mCherry
							Isolated				Fisher's Exact Test for Count Data
							Fisher's Exact Test for Count Data				Isolated WT vs. mec-10 mutants
											data: m.i.cb
							data: m.i.quat				p-value = 0.006845
							p-value = 0.0001954
