# Supplementary material for: Sensory experience controls dendritic structure and behavior by distinct pathways involving degenerins
Source: eLife. 2025 Jan 10;14:e83973. doi: 10.7554/eLife.83973 (PMC11756856; doi:10.7554/eLife.83973)
Supplement: Figure 6—figure supplement 1—source data 1. [file elife-83973-fig6-figsupp1-data1.xlsx]

## Sheet: Raw data
1				2				3				4				5				6				7				8				9				10				11				12				13
Frame	Area	GCaMP		Frame	Area	GCaMP		Frame	Area	GCaMP		Frame	Area	GCaMP		Frame	Area	GCaMP		Frame	Area	GCaMP		Frame	Area	GCaMP		Frame	Area	GCaMP		Frame	Area	GCaMP		Frame	Area	GCaMP		Frame	Area	GCaMP		Frame	Area	GCaMP		Frame	Area
1	120.128	168.524		1	233.608	103.658		1	276.606	84.018		1	255.771	123.175		1	348.417	85.508		1	301.872	89.01		1	339.551	217.846		1	121.901	54.433		1	93.975	100.764		1	71.811	188		1	185.29	85.945		1	48.317	441.358		1	207.454
2	120.128	158.565		2	233.608	100.12		2	276.606	85.09		2	255.771	123.965		2	348.417	84.729		2	301.872	93.141		2	339.551	208.54		2	121.901	55.091		2	93.975	98.491		2	71.811	188.043		2	185.29	82.407		2	48.317	454.615		2	207.454
3	120.128	152.952		3	233.608	98.831		3	276.606	80.252		3	255.771	124.172		3	348.417	87.022		3	301.872	89.847		3	339.551	205.658		3	121.901	54.735		3	93.975	95.58		3	71.811	189.753		3	185.29	83.653		3	48.317	438.404		3	207.454
4	120.128	148.1		4	233.608	98.114		4	276.606	80.692		4	255.771	127.539		4	348.417	84.771		4	301.872	90.172		4	339.551	201.834		4	121.901	57.542		4	93.975	101.981		4	71.811	167.29		4	185.29	82.835		4	48.317	405.982		4	207.454
5	120.128	152.284		5	233.608	97.615		5	276.606	78.947		5	255.771	124.797		5	348.417	85.896		5	301.872	88.997		5	339.551	196.292		5	121.901	59.778		5	93.975	96.849		5	71.811	173.272		5	185.29	77.962		5	48.317	427.716		5	207.454
6	120.128	139.328		6	233.608	97.017		6	276.606	80.303		6	255.771	120.875		6	348.417	85.532		6	301.872	89.486		6	339.551	195.856		6	121.901	56.727		6	93.975	99.354		6	71.811	179.241		6	185.29	83.933		6	48.317	427.725		6	207.454
7	120.128	149.506		7	233.608	93.953		7	276.606	77.909		7	255.771	121.575		7	348.417	85.58		7	301.872	89.486		7	339.551	185.952		7	121.901	57.92		7	93.975	99.571		7	71.811	171.765		7	185.29	82.435		7	48.317	428.064		7	207.454
8	120.128	143.458		8	233.608	94.937		8	276.606	79.42		8	255.771	122.555		8	348.417	83.16		8	301.872	85.844		8	339.551	185.834		8	121.901	54.92		8	93.975	95.057		8	71.811	170.648		8	185.29	77.022		8	48.317	437.523		8	207.454
9	120.128	144.387		9	233.608	95.144		9	276.606	75.05		9	255.771	123.825		9	348.417	84.267		9	301.872	90.082		9	339.551	184.166		9	121.901	57.305		9	93.975	95.288		9	71.811	162.691		9	185.29	79.395		9	48.317	416.908		9	207.454
10	120.128	129.985		10	233.608	94.85		10	276.606	77.165		10	255.771	121.13		10	348.417	83.878		10	301.872	87.07		10	339.551	182.415		10	121.901	55.364		10	93.975	99.802		10	71.811	165.272		10	185.29	80.376		10	48.317	423.835		10	207.454
11	120.128	146.358		11	233.608	92.915		11	276.606	73.582		11	255.771	119.962		11	348.417	85.284		11	301.872	89.172		11	339.551	177.52		11	121.901	58.076		11	93.975	92.495		11	71.811	161.531		11	185.29	75.347		11	48.317	417.908		11	207.454
12	120.128	149.328		12	233.608	90.818		12	276.606	74.037		12	255.771	123.347		12	348.417	83.323		12	301.872	88.229		12	339.551	181.482		12	121.901	58.887		12	93.975	90.481		12	71.811	163.278		12	185.29	79.742		12	48.317	414.56		12	207.454
13	120.128	144.727		13	233.608	91.985		13	276.606	72.668		13	255.771	123.515		13	348.417	82.665		13	301.872	84.684		13	339.551	177.664		13	121.901	55.96		13	93.975	97.717		13	71.811	162.667		13	185.29	78.593		13	48.317	424.872		13	207.454
14	120.128	142.775		14	233.608	93.641		14	276.606	70.838		14	255.771	123.44		14	348.417	84.48		14	301.872	87.057		14	339.551	177.547		14	121.901	56.2		14	93.975	99.684		14	71.811	160.654		14	185.29	75.507		14	48.317	426.376		14	207.454
15	120.128	139.491		15	233.608	89.324		15	276.606	67.205		15	255.771	123.971		15	348.417	85.216		15	301.872	86.151		15	339.551	174.786		15	121.901	54.302		15	93.975	96.458		15	71.811	154.42		15	185.29	76.091		15	48.317	420.211		15	207.454
16	120.128	142.413		16	233.608	87.461		16	276.606	65.723		16	255.771	120.461		16	348.417	85.505		16	301.872	86.51		16	339.551	169.954		16	121.901	55.109		16	93.975	99.396		16	71.811	161.432		16	185.29	75.452		16	48.317	414.211		16	207.454
17	120.128	137.225		17	233.608	91.148		17	276.606	67.268		17	255.771	121.801		17	348.417	82.038		17	301.872	85.514		17	339.551	175.905		17	121.901	57.429		17	93.975	96.052		17	71.811	161.056		17	185.29	74.809		17	48.317	404.862		17	207.454
18	120.128	135.557		18	233.608	85.099		18	276.606	64.385		18	255.771	120.251		18	348.417	86.59		18	301.872	85.604		18	339.551	170.121		18	121.901	56.633		18	93.975	97.75		18	71.811	158.735		18	185.29	77.945		18	48.317	412.33		18	207.454
19	120.128	138.934		19	233.608	87.317		19	276.606	66.724		19	255.771	125.161		19	348.417	82.791		19	301.872	87.499		19	339.551	171.819		19	121.901	58.022		19	93.975	98.033		19	71.811	153.568		19	185.29	74.849		19	48.317	415.229		19	207.454
20	120.128	138.063		20	233.608	86.343		20	276.606	72.553		20	255.771	121.003		20	348.417	83.433		20	301.872	86.521		20	339.551	172.403		20	121.901	54.927		20	93.975	94.821		20	71.811	162.241		20	185.29	77.586		20	48.317	404.743		20	207.454
21	120.128	141.845		21	233.608	90.19		21	276.606	74.486		21	255.771	123.504		21	348.417	83.553		21	301.872	84.811		21	339.551	172.36		21	121.901	56.647		21	93.975	93.387		21	71.811	158.37		21	185.29	74.256		21	48.317	409.725		21	207.454
22	120.128	142.738		22	233.608	91.579		22	276.606	77.561		22	255.771	120.005		22	348.417	84.728		22	301.872	84.465		22	339.551	179.961		22	121.901	56.582		22	93.975	98.104		22	71.811	157.333		22	185.29	75.378		22	48.317	400.303		22	207.454
23	120.128	134.923		23	233.608	89.214		23	276.606	74.668		23	255.771	120.147		23	348.417	83.099		23	301.872	83.974		23	339.551	170.51		23	121.901	57.124		23	93.975	94.575		23	71.811	165.364		23	185.29	76.297		23	48.317	416.073		23	207.454
24	120.128	138.192		24	233.608	88.905		24	276.606	71.944		24	255.771	120.57		24	348.417	84.006		24	301.872	87.667		24	339.551	173.244		24	121.901	58.247		24	93.975	96.825		24	71.811	152.815		24	185.29	78.73		24	48.317	404.771		24	207.454
25	120.128	136.886		25	233.608	85.541		25	276.606	71.987		25	255.771	119.894		25	348.417	84.275		25	301.872	86.568		25	339.551	171.795		25	121.901	57.796		25	93.975	99.33		25	71.811	150.062		25	185.29	75.328		25	48.317	397.752		25	207.454
26	120.128	132.417		26	233.608	86.013		26	276.606	70.587		26	255.771	121.496		26	348.417	84.911		26	301.872	86.42		26	339.551	166.095		26	121.901	58.964		26	93.975	97.453		26	71.811	153.142		26	185.29	72.383		26	48.317	388.908		26	207.454
27	120.128	129.782		27	233.608	85.615		27	276.606	70.889		27	255.771	121.652		27	348.417	85.019		27	301.872	86.89		27	339.551	160.758		27	121.901	57.673		27	93.975	95.92		27	71.811	154.204		27	185.29	72.55		27	48.317	409.578		27	207.454
28	120.128	133.417		28	233.608	87.459		28	276.606	72.333		28	255.771	122.697		28	348.417	83.772		28	301.872	85.949		28	339.551	156.756		28	121.901	52.978		28	93.975	92.283		28	71.811	144.265		28	185.29	68.88		28	48.317	406.018		28	207.454
29	120.128	132.288		29	233.608	89.015		29	276.606	71.232		29	255.771	120.532		29	348.417	81.59		29	301.872	86.266		29	339.551	153.416		29	121.901	54.415		29	93.975	103.788		29	71.811	153.13		29	185.29	69.943		29	48.317	409.119		29	207.454
30	120.128	133.443		30	233.608	90.533		30	276.606	74.034		30	255.771	120.983		30	348.417	84.154		30	301.872	86.756		30	339.551	146.892		30	121.901	51.084		30	93.975	92.684		30	71.811	155.506		30	185.29	62.242		30	48.317	412.046		30	207.454
31	120.128	132.244		31	233.608	91.634		31	276.606	73.351		31	255.771	121.596		31	348.417	84.408		31	301.872	87.144		31	339.551	155.59		31	121.901	53.073		31	93.975	90.42		31	71.811	160.346		31	185.29	59.371		31	48.317	396.872		31	207.454
32	120.128	138.487		32	233.608	95.29		32	276.606	73.535		32	255.771	122.418		32	348.417	80.953		32	301.872	87.336		32	339.551	170.573		32	121.901	49.36		32	93.975	96.005		32	71.811	150.34		32	185.29	56.627		32	48.317	387.826		32	207.454
33	120.128	132.764		33	233.608	92.89		33	276.606	72.136		33	255.771	123.437		33	348.417	83.354		33	301.872	85.978		33	339.551	187.551		33	121.901	51.938		33	93.975	94.241		33	71.811	148.309		33	185.29	58.354		33	48.317	414.734		33	207.454
34	120.128	133.959		34	233.608	91.994		34	276.606	72.663		34	255.771	125.097		34	348.417	85.112		34	301.872	88.863		34	339.551	199.145		34	121.901	49.636		34	93.975	91.491		34	71.811	153.173		34	185.29	59.328		34	48.317	417.661		34	207.454
35	120.128	127.461		35	233.608	92.269		35	276.606	72.822		35	255.771	123.388		35	348.417	80.449		35	301.872	86.047		35	339.551	202.722		35	121.901	53.127		35	93.975	98.16		35	71.811	152.235		35	185.29	57.596		35	48.317	389.183		35	207.454
36	120.128	133.306		36	233.608	95.214		36	276.606	73.958		36	255.771	123.683		36	348.417	84.256		36	301.872	85.89		36	339.551	204.909		36	121.901	52.004		36	93.975	92.396		36	71.811	144.975		36	185.29	62.835		36	48.317	405.028		36	207.454
37	120.128	141.535		37	233.608	92.334		37	276.606	74.393		37	255.771	122.766		37	348.417	83.274		37	301.872	87.449		37	339.551	201.813		37	121.901	51.029		37	93.975	90.085		37	71.811	153.08		37	185.29	60.756		37	48.317	388.532		37	207.454
38	120.128	136.742		38	233.608	90.617		38	276.606	76.362		38	255.771	124.802		38	348.417	84.033		38	301.872	85.747		38	339.551	196.55		38	121.901	52.822		38	93.975	93.901		38	71.811	150.414		38	185.29	63.804		38	48.317	400.651		38	207.454
39	120.128	133.815		39	233.608	92.666		39	276.606	72.192		39	255.771	120.742		39	348.417	83.092		39	301.872	86.546		39	339.551	200.547		39	121.901	51.498		39	93.975	90.524		39	71.811	149.611		39	185.29	60.921		39	48.317	410.128		39	207.454
40	120.128	131.624		40	233.608	94.86		40	276.606	73.702		40	255.771	124.229		40	348.417	80.649		40	301.872	83.971		40	339.551	197.11		40	121.901	54.847		40	93.975	89.858		40	71.811	154.735		40	185.29	63.041		40	48.317	401.991		40	207.454
41	120.128	124.351		41	233.608	91.981		41	276.606	73.904		41	255.771	121.674		41	348.417	83.893		41	301.872	84.172		41	339.551	192.262		41	121.901	51.429		41	93.975	90.816		41	71.811	149.735		41	185.29	64.189		41	48.317	392.587		41	207.454
42	120.128	125.513		42	233.608	90.702		42	276.606	77.221		42	255.771	125.539		42	348.417	83.543		42	301.872	85.853		42	339.551	192.802		42	121.901	54.189		42	93.975	87.618		42	71.811	146.173		42	185.29	65.45		42	48.317	407.101		42	207.454
43	120.128	123.358		43	233.608	89.357		43	276.606	75.561		43	255.771	121.371		43	348.417	82.359		43	301.872	84.571		43	339.551	191.909		43	121.901	54.258		43	93.975	87.467		43	71.811	144.099		43	185.29	67.44		43	48.317	400.284		43	207.454
44	120.128	124.041		44	233.608	88.26		44	276.606	73.043		44	255.771	119.856		44	348.417	83.207		44	301.872	86.457		44	339.551	175.375		44	121.901	54.593		44	93.975	94.5		44	71.811	146.778		44	185.29	65.876		44	48.317	400.752		44	207.454
45	120.128	123.454		45	233.608	90.882		45	276.606	71.574		45	255.771	122.463		45	348.417	84.056		45	301.872	84.665		45	339.551	161.851		45	121.901	52.087		45	93.975	89.726		45	71.811	150.37		45	185.29	74.072		45	48.317	397.688		45	207.454
46	120.128	119.325		46	233.608	86.694		46	276.606	75.231		46	255.771	123.055		46	348.417	80.99		46	301.872	85.659		46	339.551	154.172		46	121.901	57.538		46	93.975	91.42		46	71.811	144.58		46	185.29	75.687		46	48.317	401.917		46	207.454
47	120.128	123.059		47	233.608	90.391		47	276.606	70.973		47	255.771	120.456		47	348.417	81.925		47	301.872	82.514		47	339.551	164.573		47	121.901	57.611		47	93.975	91.401		47	71.811	139.938		47	185.29	79.055		47	48.317	389.55		47	207.454
48	120.128	131.137		48	233.608	92.292		48	276.606	71.087		48	255.771	122.643		48	348.417	82.383		48	301.872	85.125		48	339.551	171.101		48	121.901	58.604		48	93.975	91.038		48	71.811	143.704		48	185.29	77.278		48	48.317	393.927		48	207.454
49	120.128	124.568		49	233.608	88.051		49	276.606	70.787		49	255.771	122.25		49	348.417	83.293		49	301.872	83.843		49	339.551	179.837		49	121.901	56.055		49	93.975	91.92		49	71.811	150.531		49	185.29	79.285		49	48.317	390.927		49	207.454
50	120.128	126.188		50	233.608	89.042		50	276.606	68.947		50	255.771	123.95		50	348.417	82.878		50	301.872	83.163		50	339.551	187.134		50	121.901	56.673		50	93.975	94.292		50	71.811	148.093		50	185.29	77.153		50	48.317	397.661		50	207.454
51	120.128	126.181		51	233.608	89.784		51	276.606	66.466		51	255.771	118.057		51	348.417	83.3		51	301.872	83.722		51	339.551	197.046		51	121.901	54.927		51	93.975	89.222		51	71.811	156.833		51	185.29	79.529		51	48.317	407.312		51	207.454
52	120.128	132.251		52	233.608	93.617		52	276.606	67.29		52	255.771	119.196		52	348.417	82.486		52	301.872	84.341		52	339.551	202.839		52	121.901	54.909		52	93.975	93.901		52	71.811	150.259		52	185.29	78.036		52	48.317	404.954		52	207.454
53	120.128	131.911		53	233.608	94.317		53	276.606	67.638		53	255.771	122.014		53	348.417	83.405		53	301.872	82.852		53	339.551	200.262		53	121.901	53.778		53	93.975	87.604		53	71.811	146.895		53	185.29	78.646		53	48.317	421.532		53	207.454
54	120.128	128.166		54	233.608	92.078		54	276.606	66.611		54	255.771	119.953		54	348.417	81.996		54	301.872	85.96		54	339.551	203.15		54	121.901	54.022		54	93.975	90.325		54	71.811	148.463		54	185.29	80.933		54	48.317	411.459		54	207.454
55	120.128	134.022		55	233.608	87.315		55	276.606	68.744		55	255.771	122.541		55	348.417	84.112		55	301.872	85.11		55	339.551	199.415		55	121.901	56.6		55	93.975	81.585		55	71.811	151.481		55	185.29	76.11		55	48.317	407.752		55	207.454
56	120.128	127.461		56	233.608	90.239		56	276.606	65.667		56	255.771	121.522		56	348.417	81.874		56	301.872	82.953		56	339.551	201.349		56	121.901	53.211		56	93.975	89.429		56	71.811	142.988		56	185.29	76.557		56	48.317	417.468		56	207.454
57	120.128	129.956		57	233.608	92.852		57	276.606	69.595		57	255.771	124.12		57	348.417	82.804		57	301.872	85.01		57	339.551	205.324		57	121.901	55.335		57	93.975	83.429		57	71.811	145.889		57	185.29	78.409		57	48.317	411.11		57	207.454
58	120.128	131.103		58	233.608	86.937		58	276.606	72.401		58	255.771	122.406		58	348.417	82.587		58	301.872	85.715		58	339.551	204.007		58	121.901	54.164		58	93.975	84.514		58	71.811	141.574		58	185.29	76.658		58	48.317	428.486		58	207.454
59	120.128	133.952		59	233.608	85.472		59	276.606	73.091		59	255.771	122.948		59	348.417	80.959		59	301.872	82.824		59	339.551	201.841		59	121.901	55.385		59	93.975	86.009		59	71.811	151.481		59	185.29	74.612		59	48.317	411.33		59	207.454
60	120.128	137.391		60	233.608	85.626		60	276.606	70.329		60	255.771	121.553		60	348.417	80.949		60	301.872	82.63		60	339.551	201.845		60	121.901	58.004		60	93.975	91.665		60	71.811	144.654		60	185.29	75.172		60	48.317	402.147		60	207.454
61	120.128	129.716		61	233.608	86.759		61	276.606	71.205		61	255.771	121.794		61	348.417	81.578		61	301.872	84.33		61	339.551	198.462		61	121.901	57.564		61	93.975	86.759		61	71.811	137.074		61	185.29	74.823		61	48.317	401.385		61	207.454
62	120.128	129.185		62	233.608	87.203		62	276.606	72.114		62	255.771	121.735		62	348.417	80.001		62	301.872	84.605		62	339.551	193.937		62	121.901	57.069		62	93.975	86.099		62	71.811	149.864		62	185.29	74.306		62	48.317	401.239		62	207.454
63	120.128	136.952		63	233.608	83.385		63	276.606	69.699		63	255.771	123.419		63	348.417	77.365		63	301.872	85.285		63	339.551	186.761		63	121.901	58.589		63	93.975	83.491		63	71.811	143.691		63	185.29	71.794		63	48.317	422.303		63	207.454
64	120.128	131.347		64	233.608	82.195		64	276.606	73.897		64	255.771	122.26		64	348.417	80.174		64	301.872	81.868		64	339.551	186.824		64	121.901	57.865		64	93.975	84.335		64	71.811	152.315		64	185.29	74.866		64	48.317	410.303		64	207.454
65	120.128	131.229		65	233.608	84.372		65	276.606	72.952		65	255.771	122.932		65	348.417	80.927		65	301.872	83.824		65	339.551	181.436		65	121.901	56.702		65	93.975	83.118		65	71.811	150.58		65	185.29	72.952		65	48.317	413.771		65	207.454
66	120.128	134.502		66	233.608	82.565		66	276.606	72.535		66	255.771	122.017		66	348.417	81.602		66	301.872	82.549		66	339.551	194.496		66	121.901	58.364		66	93.975	83.184		66	71.811	140.469		66	185.29	72.311		66	48.317	404.807		66	207.454
67	120.128	138.133		67	233.608	87.213		67	276.606	72.482		67	255.771	120.241		67	348.417	81.844		67	301.872	84.548		67	339.551	194.769		67	121.901	58.815		67	93.975	83.226		67	71.811	145.512		67	185.29	74.675		67	48.317	422.908		67	207.454
68	120.128	133.089		68	233.608	84.148		68	276.606	72.888		68	255.771	124.879		68	348.417	80.237		68	301.872	82.674		68	339.551	196.249		68	121.901	56.015		68	93.975	79.906		68	71.811	146.407		68	185.29	72.067		68	48.317	420.092		68	207.454
69	120.128	139.638		69	233.608	84.767		69	276.606	70.224		69	255.771	123.085		69	348.417	80.494		69	301.872	82.1		69	339.551	188.79		69	121.901	57.916		69	93.975	88.099		69	71.811	145.71		69	185.29	71.675		69	48.317	413.138		69	207.454
70	120.128	136.823		70	233.608	80.188		70	276.606	68.061		70	255.771	118.319		70	348.417	81.649		70	301.872	82.702		70	339.551	188.479		70	121.901	58.069		70	93.975	86.764		70	71.811	143.728		70	185.29	71.591		70	48.317	398.917		70	207.454
71	120.128	128.38		71	233.608	82.357		71	276.606	63.923		71	255.771	121.529		71	348.417	79.164		71	301.872	83.477		71	339.551	188.252		71	121.901	59.145		71	93.975	82.948		71	71.811	145.957		71	185.29	70.388		71	48.317	408.275		71	207.454
72	120.128	137.218		72	233.608	84.446		72	276.606	65.423		72	255.771	120.08		72	348.417	81.73		72	301.872	78.947		72	339.551	188.796		72	121.901	59.793		72	93.975	81.948		72	71.811	147.191		72	185.29	70.866		72	48.317	412.339		72	207.454
73	120.128	134.764		73	233.608	85.239		73	276.606	67.244		73	255.771	122.752		73	348.417	78.476		73	301.872	84.373		73	339.551	193.744		73	121.901	64.869		73	93.975	84.108		73	71.811	152.63		73	185.29	73.993		73	48.317	396.128		73	207.454
74	120.128	135.439		74	233.608	80.387		74	276.606	68.385		74	255.771	121.144		74	348.417	79.995		74	301.872	83.564		74	339.551	189.54		74	121.901	62.844		74	93.975	82.396		74	71.811	144.926		74	185.29	69.423		74	48.317	418.835		74	207.454
75	120.128	138.007		75	233.608	85.385		75	276.606	64.46		75	255.771	118.574		75	348.417	79.55		75	301.872	81.355		75	339.551	185.445		75	121.901	63.451		75	93.975	88.255		75	71.811	142.735		75	185.29	72.651		75	48.317	408.624		75	207.454
76	120.128	146.974		76	233.608	83.011		76	276.606	67.577		76	255.771	119.12		76	348.417	78.893		76	301.872	82.48		76	339.551	185.347		76	121.901	61.378		76	93.975	85.283		76	71.811	144.5		76	185.29	71.385		76	48.317	390.789		76	207.454
77	120.128	149.771		77	233.608	84.486		77	276.606	67.111		77	255.771	120.458		77	348.417	78.048		77	301.872	81.608		77	339.551	182.479		77	121.901	59.869		77	93.975	89.123		77	71.811	143.327		77	185.29	68.404		77	48.317	410.982		77	207.454
78	120.128	150.601		78	233.608	83.755		78	276.606	65.917		78	255.771	123.534		78	348.417	80.268		78	301.872	80.463		78	339.551	178.752		78	121.901	62.229		78	93.975	84.509		78	71.811	155.852		78	185.29	67.895		78	48.317	395.257		78	207.454
79	120.128	155.424		79	233.608	83.676		79	276.606	66.237		79	255.771	121.983		79	348.417	77.08		79	301.872	82.192		79	339.551	182.863		79	121.901	62.273		79	93.975	89.392		79	71.811	151.019		79	185.29	71.751		79	48.317	419.679		79	207.454
80	120.128	155.022		80	233.608	82.18		80	276.606	64.319		80	255.771	123.872		80	348.417	78.122		80	301.872	81.977		80	339.551	181.255		80	121.901	64.516		80	93.975	87.142		80	71.811	137.512		80	185.29	72.646		80	48.317	402.578		80	207.454
81	120.128	137.037		81	233.608	82.342		81	276.606	64.782		81	255.771	120.463		81	348.417	80.326		81	301.872	82.83		81	339.551	186.604		81	121.901	64.135		81	93.975	87.613		81	71.811	151.938		81	185.29	71.773		81	48.317	400.505		81	207.454
82	120.128	138.83		82	233.608	81.992		82	276.606	64.599		82	255.771	121.823		82	348.417	79.933		82	301.872	82.349		82	339.551	182.209		82	121.901	65.331		82	93.975	89.17		82	71.811	152.506		82	185.29	68.538		82	48.317	396.679		82	207.454
83	120.128	138.502		83	233.608	83.994		83	276.606	64.413		83	255.771	119.581		83	348.417	79.641		83	301.872	82.151		83	339.551	182.137		83	121.901	62.52		83	93.975	81.844		83	71.811	150.858		83	185.29	70.974		83	48.317	390.642		83	207.454
84	120.128	141.395		84	233.608	82.66		84	276.606	66.425		84	255.771	121.844		84	348.417	79.009		84	301.872	82.54		84	339.551	183.608		84	121.901	63.193		84	93.975	86.689		84	71.811	153.562		84	185.29	68.397		84	48.317	399.358		84	207.454
85	120.128	139.306		85	233.608	78.935		85	276.606	64.527		85	255.771	124.182		85	348.417	81.324		85	301.872	81.733		85	339.551	185.269		85	121.901	61.775		85	93.975	88.434		85	71.811	145.469		85	185.29	70.096		85	48.317	377.615		85	207.454
86	120.128	141.196		86	233.608	80.021		86	276.606	63.973		86	255.771	121.945		86	348.417	80.27		86	301.872	79.213		86	339.551	177.523		86	121.901	62.385		86	93.975	89.226		86	71.811	150.327		86	185.29	72.584		86	48.317	389.073		86	207.454
87	120.128	141.731		87	233.608	79.152		87	276.606	64.843		87	255.771	120.08		87	348.417	81.971		87	301.872	80.95		87	339.551	186.53		87	121.901	62.604		87	93.975	90.434		87	71.811	140.16		87	185.29	69.392		87	48.317	389.56		87	207.454
88	120.128	142.236		88	233.608	78.814		88	276.606	64.136		88	255.771	121.678		88	348.417	82.148		88	301.872	80.278		88	339.551	191.286		88	121.901	62.062		88	93.975	90.774		88	71.811	153.593		88	185.29	71.933		88	48.317	407.514		88	207.454
89	120.128	141.55		89	233.608	75.463		89	276.606	63.99		89	255.771	120.523		89	348.417	82.274		89	301.872	79.724		89	339.551	187.723		89	121.901	57.778		89	93.975	91.675		89	71.811	144.988		89	185.29	70.313		89	48.317	395.431		89	207.454
90	120.128	140.609		90	233.608	76.653		90	276.606	61.309		90	255.771	122.069		90	348.417	82.008		90	301.872	80.38		90	339.551	191.966		90	121.901	60.284		90	93.975	87.519		90	71.811	146.58		90	185.29	72.117		90	48.317	401.697		90	207.454
91	120.128	140.694		91	233.608	79.163		91	276.606	62.046		91	255.771	117.778		91	348.417	79.195		91	301.872	80.332		91	339.551	192.324		91	121.901	59.68		91	93.975	93.712		91	71.811	155.284		91	185.29	71.754		91	48.317	381.817		91	207.454
92	120.128	136.096		92	233.608	79.049		92	276.606	63.478		92	255.771	124.069		92	348.417	81.17		92	301.872	81.162		92	339.551	193.398		92	121.901	59.215		92	93.975	94.708		92	71.811	138.994		92	185.29	72.916		92	48.317	375.917		92	207.454
93	120.128	140.838		93	233.608	77.171		93	276.606	63.216		93	255.771	122.026		93	348.417	81.71		93	301.872	79.214		93	339.551	190.03		93	121.901	61.462		93	93.975	92.788		93	71.811	149.852		93	185.29	67.978		93	48.317	398.119		93	207.454
94	120.128	135.742		94	233.608	76.315		94	276.606	63.803		94	255.771	124.364		94	348.417	82.352		94	301.872	80.186		94	339.551	193.347		94	121.901	61.815		94	93.975	87.901		94	71.811	152.259		94	185.29	68.718		94	48.317	388.083		94	207.454
95	120.128	137.808		95	233.608	76.201		95	276.606	61.845		95	255.771	121.029		95	348.417	79.299		95	301.872	83.203		95	339.551	186.372		95	121.901	55.945		95	93.975	91.75		95	71.811	146.056		95	185.29	70.421		95	48.317	385.486		95	207.454
96	120.128	134.166		96	233.608	76.486		96	276.606	65.058		96	255.771	119.267		96	348.417	80.788		96	301.872	81.128		96	339.551	188.379		96	121.901	59.138		96	93.975	91.406		96	71.811	157.537		96	185.29	70.569		96	48.317	389.128		96	207.454
97	120.128	131.638		97	233.608	75.894		97	276.606	62.553		97	255.771	121.945		97	348.417	82.664		97	301.872	81.244		97	339.551	181.069		97	121.901	53.993		97	93.975	88.476		97	71.811	150.438		97	185.29	68.455		97	48.317	396.229		97	207.454
98	120.128	125.819		98	233.608	75.125		98	276.606	62.425		98	255.771	120.402		98	348.417	81.354		98	301.872	79.884		98	339.551	181.322		98	121.901	54.615		98	93.975	90.92		98	71.811	153.309		98	185.29	72.498		98	48.317	387.523		98	207.454
99	120.128	128.996		99	233.608	75.433		99	276.606	61.191		99	255.771	122.269		99	348.417	80.813		99	301.872	81.238		99	339.551	174.358		99	121.901	58.305		99	93.975	87.637		99	71.811	151.142		99	185.29	69.189		99	48.317	392.633		99	207.454
100	120.128	127.192		100	233.608	77.446		100	276.606	61.018		100	255.771	121.53		100	348.417	81.042		100	301.872	82.145		100	339.551	172.935		100	121.901	53.956		100	93.975	85.854		100	71.811	148.654		100	185.29	65.715		100	48.317	385.018		100	207.454
101	120.128	127.638		101	233.608	76.271		101	276.606	61.446		101	255.771	119.315		101	348.417	79.83		101	301.872	80.508		101	339.551	172.441		101	121.901	55.367		101	93.975	84.113		101	71.811	148.407		101	185.29	68.356		101	48.317	388.954		101	207.454
102	120.128	129.148		102	233.608	79.55		102	276.606	61.774		102	255.771	120.568		102	348.417	79.641		102	301.872	80.827		102	339.551	172.713		102	121.901	57.698		102	93.975	89.646		102	71.811	150.352		102	185.29	66.136		102	48.317	393.817		102	207.454
103	120.128	137.059		103	233.608	77.894		103	276.606	61.572		103	255.771	122.019		103	348.417	79.991		103	301.872	84.366		103	339.551	168.321		103	121.901	53.247		103	93.975	91.925		103	71.811	155.488		103	185.29	63.514		103	48.317	380.927		103	207.454
104	120.128	137.801		104	233.608	75.529		104	276.606	62.059		104	255.771	122.712		104	348.417	79.808		104	301.872	79.577		104	339.551	166.587		104	121.901	55.375		104	93.975	89.877		104	71.811	145.765		104	185.29	66.423		104	48.317	402.862		104	207.454
105	120.128	134.908		105	233.608	77.721		105	276.606	63.768		105	255.771	118.608		105	348.417	77.931		105	301.872	81.446		105	339.551	167.085		105	121.901	49.753		105	93.975	89.222		105	71.811	150.185		105	185.29	64.194		105	48.317	390.752		105	207.454
106	120.128	147.022		106	233.608	76.657		106	276.606	63.769		106	255.771	123.641		106	348.417	79.223		106	301.872	80.51		106	339.551	158.431		106	121.901	55.222		106	93.975	86.646		106	71.811	151.975		106	185.29	64.459		106	48.317	392.853		106	207.454
107	120.128	146.712		107	233.608	76.133		107	276.606	61.372		107	255.771	121.036		107	348.417	78.137		107	301.872	79.645		107	339.551	152.649		107	121.901	56.978		107	93.975	86.684		107	71.811	148.309		107	185.29	65.249		107	48.317	379.798		107	207.454
108	120.128	156.72		108	233.608	78.992		108	276.606	63.59		108	255.771	119.808		108	348.417	78.043		108	301.872	79.031		108	339.551	143.351		108	121.901	53.149		108	93.975	82.132		108	71.811	153.685		108	185.29	65.462		108	48.317	404.44		108	207.454
109	120.128	147.351		109	233.608	79.818		109	276.606	61.888		109	255.771	114.168		109	348.417	78.584		109	301.872	82.439		109	339.551	140.755		109	121.901	52.338		109	93.975	83.278		109	71.811	142.191		109	185.29	67.318		109	48.317	390.257		109	207.454
110	120.128	154.539		110	233.608	79.865		110	276.606	61.425		110	255.771	123.877		110	348.417	77.564		110	301.872	79.233		110	339.551	139.185		110	121.901	53.335		110	93.975	81.92		110	71.811	148.698		110	185.29	67.222		110	48.317	401.826		110	207.454
111	120.128	146.76		111	233.608	81.332		111	276.606	62.405		111	255.771	117.922		111	348.417	80.679		111	301.872	78.822		111	339.551	134.316		111	121.901	53.687		111	93.975	88.708		111	71.811	152.66		111	185.29	64.823		111	48.317	374.881		111	207.454
112	120.128	143.306		112	233.608	80.529		112	276.606	62.796		112	255.771	121.383		112	348.417	77.024		112	301.872	79.473		112	339.551	136.901		112	121.901	55.316		112	93.975	82.175		112	71.811	148.519		112	185.29	67.835		112	48.317	369.11		112	207.454
113	120.128	142.646		113	233.608	80.892		113	276.606	62.647		113	255.771	120.246		113	348.417	78.678		113	301.872	80.204		113	339.551	138.2		113	121.901	52.975		113	93.975	87.241		113	71.811	149.481		113	185.29	66.639		113	48.317	402.761		113	207.454
114	120.128	139.258		114	233.608	81.97		114	276.606	63.019		114	255.771	121.759		114	348.417	77.833		114	301.872	80.147		114	339.551	136.642		114	121.901	55.884		114	93.975	87.858		114	71.811	140.833		114	185.29	67.261		114	48.317	384.45		114	207.454
115	120.128	138.793		115	233.608	80.996		115	276.606	62.59		115	255.771	123.894		115	348.417	79.201		115	301.872	78.693		115	339.551	139.003		115	121.901	56.538		115	93.975	82.321		115	71.811	145.944		115	185.29	67.804		115	48.317	374.954		115	207.454
116	120.128	143.402		116	233.608	83.4		116	276.606	61.274		116	255.771	121.035		116	348.417	77.188		116	301.872	79.518		116	339.551	142.817		116	121.901	53.302		116	93.975	89.651		116	71.811	153.105		116	185.29	66.318		116	48.317	386.339		116	207.454
117	120.128	146.114		117	233.608	84.476		117	276.606	62.168		117	255.771	119.144		117	348.417	78.398		117	301.872	77.504		117	339.551	145.774		117	121.901	54.284		117	93.975	84.448		117	71.811	146.444		117	185.29	68.713		117	48.317	399.229		117	207.454
118	120.128	147.461		118	233.608	81.454		118	276.606	58.798		118	255.771	120.485		118	348.417	74.969		118	301.872	79.474		118	339.551	151.877		118	121.901	52.491		118	93.975	89.344		118	71.811	146.185		118	185.29	67.909		118	48.317	380.881		118	207.454
119	120.128	145.579		119	233.608	84.123		119	276.606	61.452		119	255.771	122.915		119	348.417	77.201		119	301.872	80.846		119	339.551	153.742		119	121.901	51.429		119	93.975	89.212		119	71.811	151.951		119	185.29	68.876		119	48.317	387.229		119	207.454
120	120.128	140.76		120	233.608	81.074		120	276.606	60.92		120	255.771	119.263		120	348.417	78.388		120	301.872	77.529		120	339.551	155.218		120	121.901	52.422		120	93.975	90.193		120	71.811	153.302		120	185.29	69.545		120	48.317	389.339		120	207.454
121	120.128	141.262		121	233.608	78.676		121	276.606	60.216		121	255.771	123.166		121	348.417	76.419		121	301.872	78.772		121	339.551	156.772		121	121.901	52.342		121	93.975	88.632		121	71.811	154.401		121	185.29	67.414		121	48.317	373.376		121	207.454
122	120.128	145.262		122	233.608	78.425		122	276.606	63.982		122	255.771	119.109		122	348.417	76.352		122	301.872	81.236		122	339.551	157.333		122	121.901	53.655		122	93.975	91.349		122	71.811	158.148		122	185.29	68.182		122	48.317	377.147		122	207.454
123	120.128	142.819		123	233.608	81.298		123	276.606	62.788		123	255.771	119.901		123	348.417	76.584		123	301.872	79.329		123	339.551	154.781		123	121.901	52.276		123	93.975	91.283		123	71.811	153.642		123	185.29	67.756		123	48.317	385.963		123	207.454
124	120.128	140.45		124	233.608	83.457		124	276.606	61.809		124	255.771	120.584		124	348.417	76.851		124	301.872	75.501		124	339.551	161.701		124	121.901	52.502		124	93.975	90.953		124	71.811	157.37		124	185.29	67.569		124	48.317	395.312		124	207.454
125	120.128	136.044		125	233.608	78.306		125	276.606	63.615		125	255.771	118.333		125	348.417	79.253		125	301.872	77.482		125	339.551	154.577		125	121.901	53.553		125	93.975	89.863		125	71.811	153.099		125	185.29	64.945		125	48.317	378.028		125	207.454
126	120.128	130.288		126	233.608	79.571		126	276.606	64.684		126	255.771	122.823		126	348.417	77.515		126	301.872	78.499		126	339.551	156.322		126	121.901	52.098		126	93.975	91.165		126	71.811	152.438		126	185.29	65.995		126	48.317	367.239		126	207.454
127	120.128	130.506		127	233.608	80.554		127	276.606	64.035		127	255.771	122.055		127	348.417	78.506		127	301.872	80.814		127	339.551	154.001		127	121.901	48.775		127	93.975	90.179		127	71.811	151.895		127	185.29	67.311		127	48.317	400.716		127	207.454
128	120.128	129.199		128	233.608	75.552		128	276.606	63.194		128	255.771	119.997		128	348.417	77.452		128	301.872	78.319		128	339.551	157.319		128	121.901	53.247		128	93.975	95.377		128	71.811	143.401		128	185.29	69.617		128	48.317	399.972		128	207.454
129	120.128	132.284		129	233.608	78.641		129	276.606	62.736		129	255.771	124.094		129	348.417	79.31		129	301.872	77.275		129	339.551	156.295		129	121.901	54.04		129	93.975	93.858		129	71.811	147.963		129	185.29	67.498		129	48.317	391.211		129	207.454
130	120.128	133.292		130	233.608	82.503		130	276.606	63.212		130	255.771	121.321		130	348.417	77.831		130	301.872	77.394		130	339.551	161.611		130	121.901	52.749		130	93.975	98.217		130	71.811	151.691		130	185.29	67.555		130	48.317	383.569		130	207.454
131	120.128	136.395		131	233.608	78.598		131	276.606	65.188		131	255.771	124.56		131	348.417	76.459		131	301.872	78.906		131	339.551	175.107		131	121.901	51.476		131	93.975	97.858		131	71.811	151.123		131	185.29	67.684		131	48.317	384.44		131	207.454
132	120.128	136.28		132	233.608	75.886		132	276.606	64.439		132	255.771	122.643		132	348.417	78.461		132	301.872	80.065		132	339.551	187.595		132	121.901	52.189		132	93.975	92.599		132	71.811	151.58		132	185.29	68.136		132	48.317	389.495		132	207.454
133	120.128	133.841		133	233.608	78.746		133	276.606	64.495		133	255.771	120.683		133	348.417	77.001		133	301.872	77.859		133	339.551	181.999		133	121.901	55.222		133	93.975	97.019		133	71.811	150.494		133	185.29	66.512		133	48.317	388.183		133	207.454
134	120.128	135.295		134	233.608	81.231		134	276.606	66.809		134	255.771	118.842		134	348.417	78.182		134	301.872	77.746		134	339.551	186.692		134	121.901	49.538		134	93.975	94.651		134	71.811	153.543		134	185.29	65.725		134	48.317	395.33		134	207.454
135	120.128	132.085		135	233.608	79.044		135	276.606	65.689		135	255.771	121.106		135	348.417	78.262		135	301.872	74.592		135	339.551	184.403		135	121.901	52.055		135	93.975	94.887		135	71.811	155.179		135	185.29	68.62		135	48.317	394.954		135	207.454
136	120.128	124.867		136	233.608	78.924		136	276.606	65.128		136	255.771	122.475		136	348.417	79.771		136	301.872	79.357		136	339.551	185.937		136	121.901	51.622		136	93.975	95.892		136	71.811	157.741		136	185.29	65.548		136	48.317	395.147		136	207.454
137	120.128	122.742		137	233.608	80.505		137	276.606	66.454		137	255.771	117.016		137	348.417	80.079		137	301.872	79.173		137	339.551	183.275		137	121.901	50.891		137	93.975	100.453		137	71.811	157.019		137	185.29	71.356		137	48.317	383.734		137	207.454
138	120.128	122.395		138	233.608	80.721		138	276.606	60.553		138	255.771	121.043		138	348.417	79.103		138	301.872	79.684		138	339.551	172.413		138	121.901	52.695		138	93.975	95.967		138	71.811	155.525		138	185.29	64.203		138	48.317	395.358		138	207.454
139	120.128	130.539		139	233.608	78.554		139	276.606	61.212		139	255.771	119.873		139	348.417	76.996		139	301.872	77.154		139	339.551	171.256		139	121.901	52.531		139	93.975	96.656		139	71.811	152.907		139	185.29	65.904		139	48.317	387.835		139	207.454
140	120.128	123.354		140	233.608	76.406		140	276.606	60.915		140	255.771	120.102		140	348.417	78.726		140	301.872	79.838		140	339.551	173.948		140	121.901	50.116		140	93.975	96.429		140	71.811	162.216		140	185.29	67.543		140	48.317	389.275		140	207.454
141	120.128	127.768		141	233.608	76.668		141	276.606	63.705		141	255.771	123.64		141	348.417	76.774		141	301.872	78.223		141	339.551	175.503		141	121.901	50.851		141	93.975	92.203		141	71.811	154.679		141	185.29	66.524		141	48.317	398.174		141	207.454
142	120.128	126.69		142	233.608	78.655		142	276.606	63.231		142	255.771	124.17		142	348.417	79.431		142	301.872	79.721		142	339.551	177.894		142	121.901	51.513		142	93.975	101.193		142	71.811	150.154		142	185.29	66.565		142	48.317	408.798		142	207.454
143	120.128	120.779		143	233.608	77.831		143	276.606	63.266		143	255.771	124.341		143	348.417	80.567		143	301.872	78.705		143	339.551	175.824		143	121.901	55.084		143	93.975	96.019		143	71.811	155.772		143	185.29	66.242		143	48.317	396.248		143	207.454
144	120.128	127.173		144	233.608	80.495		144	276.606	64.787		144	255.771	121.653		144	348.417	78.688		144	301.872	79.355		144	339.551	172.407		144	121.901	50.691		144	93.975	95.472		144	71.811	157.525		144	185.29	64.993		144	48.317	389.56		144	207.454
145	120.128	123.207		145	233.608	80.216		145	276.606	65.167		145	255.771	123.608		145	348.417	79.888		145	301.872	77.298		145	339.551	171.021		145	121.901	49.96		145	93.975	94.594		145	71.811	158.315		145	185.29	64.22		145	48.317	391.734		145	207.454
146	120.128	120.812		146	233.608	82.427		146	276.606	63.88		146	255.771	120.875		146	348.417	76.917		146	301.872	79.26		146	339.551	167.628		146	121.901	51.847		146	93.975	98.665		146	71.811	152.222		146	185.29	64.278		146	48.317	387.963		146	207.454
147	120.128	120.428		147	233.608	83.419		147	276.606	64.285		147	255.771	119.57		147	348.417	77.912		147	301.872	79.626		147	339.551	166.805		147	121.901	55.495		147	93.975	99.16		147	71.811	163.117		147	185.29	67.725		147	48.317	386.679		147	207.454
148	120.128	118.948		148	233.608	82.038		148	276.606	62.867		148	255.771	123.716		148	348.417	79.485		148	301.872	78.257		148	339.551	166.768		148	121.901	53.142		148	93.975	95.972		148	71.811	155.253		148	185.29	67.998		148	48.317	389.156		148	207.454
149	120.128	120.114		149	233.608	81.867		149	276.606	63.652		149	255.771	119.705		149	348.417	79.458		149	301.872	76.717		149	339.551	162.991		149	121.901	54.302		149	93.975	94.203		149	71.811	156.241		149	185.29	66.799		149	48.317	387.532		149	207.454
150	120.128	118.081		150	233.608	80.776		150	276.606	62.92		150	255.771	126.565		150	348.417	78.178		150	301.872	79.361		150	339.551	168.23		150	121.901	55.331		150	93.975	92.146		150	71.811	159.92		150	185.29	65.878		150	48.317	388.862		150	207.454
151	120.128	123.461		151	233.608	78.884		151	276.606	62.123		151	255.771	121.56		151	348.417	77.992		151	301.872	76.125		151	339.551	166.761		151	121.901	58.225		151	93.975	98.689		151	71.811	152.765		151	185.29	61.986		151	48.317	388.083		151	207.454
152	120.128	126.705		152	233.608	78.736		152	276.606	61.736		152	255.771	120.601		152	348.417	79.546		152	301.872	76.361		152	339.551	171.295		152	121.901	56		152	93.975	92.868		152	71.811	154.821		152	185.29	62.309		152	48.317	389.22		152	207.454
153	120.128	123.974		153	233.608	81.203		153	276.606	62.106		153	255.771	116.804		153	348.417	80.587		153	301.872	77.593		153	339.551	168.822		153	121.901	53.738		153	93.975	92.005		153	71.811	153.481		153	185.29	64.148		153	48.317	399.358		153	207.454
154	120.128	120.207		154	233.608	81.165		154	276.606	58.761		154	255.771	123.206		154	348.417	78.817		154	301.872	75.463		154	339.551	166.803		154	121.901	52.804		154	93.975	85.835		154	71.811	151.932		154	185.29	66.285		154	48.317	390.569		154	207.454
155	120.128	124.768		155	233.608	82.034		155	276.606	61.798		155	255.771	121.997		155	348.417	76.907		155	301.872	78.068		155	339.551	168.808		155	121.901	54.2		155	93.975	87.637		155	71.811	158.358		155	185.29	66.086		155	48.317	395.193		155	207.454
156	120.128	120.52		156	233.608	78.693		156	276.606	60.79		156	255.771	121.666		156	348.417	77.804		156	301.872	76.661		156	339.551	173.843		156	121.901	52.753		156	93.975	95.566		156	71.811	158.247		156	185.29	63.067		156	48.317	398.349		156	207.454
157	120.128	121.856		157	233.608	79.683		157	276.606	59.801		157	255.771	120.742		157	348.417	79.441		157	301.872	77.185		157	339.551	171.23		157	121.901	55.476		157	93.975	93.896		157	71.811	154.901		157	185.29	66.675		157	48.317	376.798		157	207.454
158	120.128	120.037		158	233.608	79.657		158	276.606	61.713		158	255.771	117.551		158	348.417	78.218		158	301.872	77.581		158	339.551	165.603		158	121.901	53.778		158	93.975	90.995		158	71.811	156.926		158	185.29	67.098		158	48.317	412.578		158	207.454
159	120.128	123.701		159	233.608	77.861		159	276.606	64.128		159	255.771	122.088		159	348.417	77.94		159	301.872	78.006		159	339.551	165.809		159	121.901	52.309		159	93.975	93.835		159	71.811	151.883		159	185.29	64.062		159	48.317	393.633		159	207.454
160	120.128	118.852		160	233.608	77.095		160	276.606	61.449		160	255.771	123.981		160	348.417	78.444		160	301.872	78.097		160	339.551	172.683		160	121.901	51.647		160	93.975	94.792		160	71.811	145.333		160	185.29	65.639		160	48.317	395.789		160	207.454
161	120.128	123.738		161	233.608	78.311		161	276.606	61.402		161	255.771	119.51		161	348.417	78.833		161	301.872	79.292		161	339.551	169.89		161	121.901	53.487		161	93.975	92.854		161	71.811	154.062		161	185.29	66.44		161	48.317	376.633		161	207.454
162	120.128	124.417		162	233.608	80.998		162	276.606	58.506		162	255.771	124.945		162	348.417	79.14		162	301.872	75.756		162	339.551	175.303		162	121.901	56.018		162	93.975	89.245		162	71.811	161.654		162	185.29	64.301		162	48.317	393.936		162	207.454
163	120.128	119.657		163	233.608	78.366		163	276.606	64.207		163	255.771	121.584		163	348.417	78.463		163	301.872	78.207		163	339.551	175.47		163	121.901	51.858		163	93.975	96.462		163	71.811	157.673		163	185.29	63.902		163	48.317	391.532		163	207.454
164	120.128	126.613		164	233.608	80.131		164	276.606	62.248		164	255.771	121.645		164	348.417	76.257		164	301.872	80.982		164	339.551	183.111		164	121.901	49.578		164	93.975	98.566		164	71.811	151.648		164	185.29	66.837		164	48.317	397.156		164	207.454
165	120.128	121.605		165	233.608	81.065		165	276.606	63.688		165	255.771	122.211		165	348.417	76.978		165	301.872	78.15		165	339.551	177.41		165	121.901	53.065		165	93.975	98.255		165	71.811	156.994		165	185.29	64.266		165	48.317	381.624		165	207.454
166	120.128	124.181		166	233.608	81.361		166	276.606	62.266		166	255.771	123.151		166	348.417	79.411		166	301.872	77.122		166	339.551	180.598		166	121.901	52.196		166	93.975	97.392		166	71.811	154.302		166	185.29	65.718		166	48.317	384.138		166	207.454
167	120.128	130.867		167	233.608	78.664		167	276.606	61.79		167	255.771	118.813		167	348.417	76.985		167	301.872	77.636		167	339.551	177.311		167	121.901	54.233		167	93.975	93.292		167	71.811	154.512		167	185.29	66.287		167	48.317	398.679		167	207.454
168	120.128	128.705		168	233.608	78.926		168	276.606	61.207		168	255.771	120.142		168	348.417	79.039		168	301.872	76.816		168	339.551	176.428		168	121.901	52.305		168	93.975	100.066		168	71.811	157.389		168	185.29	66.938		168	48.317	388.835		168	207.454
169	120.128	131.125		169	233.608	79.231		169	276.606	62.13		169	255.771	120.884		169	348.417	77.258		169	301.872	77.537		169	339.551	180.523		169	121.901	51.476		169	93.975	94.528		169	71.811	158.568		169	185.29	67.108		169	48.317	389.174		169	207.454
170	120.128	119.483		170	233.608	79.964		170	276.606	60.772		170	255.771	120.51		170	348.417	75.597		170	301.872	77.799		170	339.551	180.457		170	121.901	50.287		170	93.975	94.311		170	71.811	154.346		170	185.29	65.213		170	48.317	399.532		170	207.454
171	120.128	122.461		171	233.608	79.243		171	276.606	60.546		171	255.771	123.166		171	348.417	77.654		171	301.872	74.493		171	339.551	182.901		171	121.901	57.076		171	93.975	100.712		171	71.811	149.556		171	185.29	70.411		171	48.317	397.972		171	207.454
172	120.128	118.561		172	233.608	76.581		172	276.606	60.598		172	255.771	123.733		172	348.417	78.481		172	301.872	76.614		172	339.551	186.184		172	121.901	52.444		172	93.975	98.189		172	71.811	157.198		172	185.29	68.56		172	48.317	389.706		172	207.454
173	120.128	118.897		173	233.608	79.543		173	276.606	60.293		173	255.771	124.081		173	348.417	76.216		173	301.872	77.681		173	339.551	183.163		173	121.901	50.433		173	93.975	96.561		173	71.811	160.278		173	185.29	68.474		173	48.317	399.211		173	207.454
174	120.128	120.122		174	233.608	76.412		174	276.606	61.258		174	255.771	122.714		174	348.417	77.593		174	301.872	76.465		174	339.551	188.131		174	121.901	53.538		174	93.975	95.354		174	71.811	149.586		174	185.29	72.251		174	48.317	392.697		174	207.454
175	120.128	118.841		175	233.608	76.118		175	276.606	62.338		175	255.771	126.484		175	348.417	76.812		175	301.872	75.963		175	339.551	193.265		175	121.901	51.48		175	93.975	102.193		175	71.811	157.432		175	185.29	67.225		175	48.317	378.67		175	207.454
176	120.128	124.801		176	233.608	79.856		176	276.606	61.809		176	255.771	122.288		176	348.417	77.326		176	301.872	74.996		176	339.551	187.544		176	121.901	50.964		176	93.975	95.099		176	71.811	145.222		176	185.29	71.493		176	48.317	398.248		176	207.454
177	120.128	120.557		177	233.608	79.254		177	276.606	61.42		177	255.771	122.277		177	348.417	75.112		177	301.872	75.784		177	339.551	189.907		177	121.901	56.884		177	93.975	97.58		177	71.811	152.858		177	185.29	73.38		177	48.317	391.083		177	207.454
178	120.128	124.923		178	233.608	82.791		178	276.606	63.119		178	255.771	121.523		178	348.417	76.154		178	301.872	76.198		178	339.551	191.029		178	121.901	52.971		178	93.975	101.981		178	71.811	163.432		178	185.29	68.419		178	48.317	388.78		178	207.454
179	120.128	128.568		179	233.608	78.755		179	276.606	61.301		179	255.771	121.598		179	348.417	77.566		179	301.872	76.349		179	339.551	188.779		179	121.901	52.062		179	93.975	92.061		179	71.811	147.617		179	185.29	66.727		179	48.317	412.257		179	207.454
180	120.128	129.066		180	233.608	81.218		180	276.606	62.125		180	255.771	119.692		180	348.417	77.276		180	301.872	75.916		180	339.551	191.401		180	121.901	51.385		180	93.975	96.538		180	71.811	153.383		180	185.29	70.184		180	48.317	390.477		180	207.454
181	120.128	126.786		181	233.608	80.047		181	276.606	60.037		181	255.771	123.144		181	348.417	79.618		181	301.872	77.391		181	339.551	192.343		181	121.901	48.869		181	93.975	95.472		181	71.811	150.34		181	185.29	69.359		181	48.317	397.972		181	207.454
182	120.128	137.07		182	233.608	78.93		182	276.606	60.984		182	255.771	120.107		182	348.417	77.562		182	301.872	76.405		182	339.551	196.714		182	121.901	51.633		182	93.975	98.858		182	71.811	155.691		182	185.29	70.502		182	48.317	388.982		182	207.454
183	120.128	127.439		183	233.608	77.985		183	276.606	64.681		183	255.771	124.341		183	348.417	76.725		183	301.872	75.568		183	339.551	186.064		183	121.901	53.458		183	93.975	98.764		183	71.811	149.772		183	185.29	68.287		183	48.317	393.431		183	207.454
184	120.128	126.937		184	233.608	78.332		184	276.606	63.875		184	255.771	121.596		184	348.417	74.744		184	301.872	77.095		184	339.551	177.836		184	121.901	49.298		184	93.975	94.208		184	71.811	150.21		184	185.29	69.182		184	48.317	369.679		184	207.454
185	120.128	124.742		185	233.608	79.222		185	276.606	63.497		185	255.771	123.776		185	348.417	75.606		185	301.872	75.317		185	339.551	183.538		185	121.901	48.396		185	93.975	100.236		185	71.811	151.099		185	185.29	69.129		185	48.317	391.495		185	207.454
186	120.128	130.572		186	233.608	76.784		186	276.606	66.216		186	255.771	122.586		186	348.417	74.849		186	301.872	73.699		186	339.551	178.772		186	121.901	49.389		186	93.975	101.906		186	71.811	153.741		186	185.29	67.861		186	48.317	389.45		186	207.454
187	120.128	132.849		187	233.608	79.653		187	276.606	64.928		187	255.771	124.019		187	348.417	77.606		187	301.872	73.054		187	339.551	172.805		187	121.901	50.087		187	93.975	95.991		187	71.811	150.068		187	185.29	73.163		187	48.317	390.908		187	207.454
188	120.128	139.225		188	233.608	77.62		188	276.606	62.417		188	255.771	124.522		188	348.417	77.897		188	301.872	75.364		188	339.551	175.154		188	121.901	47.302		188	93.975	97.189		188	71.811	153.037		188	185.29	69.718		188	48.317	385.22		188	207.454
189	120.128	137.251		189	233.608	78.241		189	276.606	62.252		189	255.771	122.513		189	348.417	75.73		189	301.872	74.874		189	339.551	169.443		189	121.901	52.425		189	93.975	95.608		189	71.811	154.438		189	185.29	67.971		189	48.317	374.294		189	207.454
190	120.128	131.945		190	233.608	77.07		190	276.606	62.712		190	255.771	122.497		190	348.417	76.613		190	301.872	72.517		190	339.551	170.076		190	121.901	48.498		190	93.975	94.165		190	71.811	152.846		190	185.29	65.258		190	48.317	391.046		190	207.454
191	120.128	142.926		191	233.608	76.786		191	276.606	61.638		191	255.771	122.981		191	348.417	77.023		191	301.872	75.053		191	339.551	169.825		191	121.901	47.207		191	93.975	95.047		191	71.811	155.815		191	185.29	67.565		191	48.317	386.275		191	207.454
192	120.128	137.657		192	233.608	77.945		192	276.606	59.917		192	255.771	123.298		192	348.417	78.391		192	301.872	77.007		192	339.551	170.918		192	121.901	47.105		192	93.975	97.608		192	71.811	158.346		192	185.29	70.976		192	48.317	379.743		192	207.454
193	120.128	137.756		193	233.608	76.142		193	276.606	61.681		193	255.771	120.738		193	348.417	77.004		193	301.872	74.288		193	339.551	168.458		193	121.901	46.949		193	93.975	93.443		193	71.811	153.87		193	185.29	68.167		193	48.317	386.789		193	207.454
194	120.128	132.188		194	233.608	79.013		194	276.606	62.883		194	255.771	120.302		194	348.417	77.908		194	301.872	73.272		194	339.551	168.119		194	121.901	47.036		194	93.975	90.925		194	71.811	147.383		194	185.29	68.581		194	48.317	388.477		194	207.454
195	120.128	136.074		195	233.608	77.148		195	276.606	58.303		195	255.771	121.149		195	348.417	76.575		195	301.872	72.391		195	339.551	174.654		195	121.901	46.673		195	93.975	97.038		195	71.811	153.037		195	185.29	69.165		195	48.317	372.752		195	207.454
196	120.128	124.915		196	233.608	80.693		196	276.606	58.885		196	255.771	121.601		196	348.417	75.865		196	301.872	72.724		196	339.551	169.627		196	121.901	47.258		196	93.975	93.533		196	71.811	153.253		196	185.29	68.749		196	48.317	381.275		196	207.454
197	120.128	132.554		197	233.608	78.605		197	276.606	60.934		197	255.771	120.993		197	348.417	75.654		197	301.872	75.783		197	339.551	168.761		197	121.901	47.545		197	93.975	91.939		197	71.811	156.63		197	185.29	69.95		197	48.317	382.211		197	207.454
198	120.128	124.875		198	233.608	81.33		198	276.606	59.011		198	255.771	119.789		198	348.417	77.841		198	301.872	74.656		198	339.551	166.847		198	121.901	46.978		198	93.975	89.599		198	71.811	151.475		198	185.29	67.833		198	48.317	379.56		198	207.454
199	120.128	126.9		199	233.608	81.727		199	276.606	59.992		199	255.771	122.939		199	348.417	74.387		199	301.872	71.518		199	339.551	167.291		199	121.901	46.731		199	93.975	93.524		199	71.811	146.37		199	185.29	68.99		199	48.317	370.596		199	207.454
200	120.128	126.993		200	233.608	85.85		200	276.606	60.745		200	255.771	123.298		200	348.417	78.355		200	301.872	75.689		200	339.551	170.14		200	121.901	49.56		200	93.975	90.344		200	71.811	158.63		200	185.29	72.239		200	48.317	395.33		200	207.454
201	120.128	130.554		201	233.608	83.4		201	276.606	62.905		201	255.771	123.929		201	348.417	75.847		201	301.872	75.458		201	339.551	167.354		201	121.901	46.469		201	93.975	95.061		201	71.811	147.907		201	185.29	67.165		201	48.317	384.083		201	207.454
202	120.128	132.841		202	233.608	80.679		202	276.606	61.979		202	255.771	118.802		202	348.417	78.216		202	301.872	76.921		202	339.551	163.68		202	121.901	50.647		202	93.975	88.434		202	71.811	153.395		202	185.29	72.648		202	48.317	385.248		202	207.454
203	120.128	133.86		203	233.608	80.586		203	276.606	60.936		203	255.771	119.62		203	348.417	75.23		203	301.872	78.013		203	339.551	160.79		203	121.901	48.371		203	93.975	91.406		203	71.811	160.247		203	185.29	68.55		203	48.317	375.156		203	207.454
204	120.128	131.827		204	233.608	80.22		204	276.606	60.925		204	255.771	124.061		204	348.417	77.58		204	301.872	72.486		204	339.551	161.531		204	121.901	50.378		204	93.975	89.151		204	71.811	154.821		204	185.29	70.969		204	48.317	369.459		204	207.454
205	120.128	127.76		205	233.608	80.998		205	276.606	63.771		205	255.771	119.749		205	348.417	77.031		205	301.872	73.159		205	339.551	163.493		205	121.901	49.229		205	93.975	88.335		205	71.811	145.025		205	185.29	69.545		205	48.317	391.211		205	207.454
206	120.128	134.867		206	233.608	82.907		206	276.606	63.288		206	255.771	118.865		206	348.417	76.359		206	301.872	74.107		206	339.551	161.243		206	121.901	50.24		206	93.975	92.193		206	71.811	155.389		206	185.29	70.423		206	48.317	392.147		206	207.454
207	120.128	133.092		207	233.608	80.262		207	276.606	61.721		207	255.771	119.815		207	348.417	78.982		207	301.872	74.89		207	339.551	167.614		207	121.901	51.873		207	93.975	89.745		207	71.811	154.438		207	185.29	70.744		207	48.317	380.239		207	207.454
208	120.128	129.889		208	233.608	79.226		208	276.606	63.657		208	255.771	122.53		208	348.417	76.406		208	301.872	75.681		208	339.551	167.047		208	121.901	50.265		208	93.975	88.58		208	71.811	152.389		208	185.29	71.677		208	48.317	376.395		208	207.454
209	120.128	125.827		209	233.608	81.482		209	276.606	62.736		209	255.771	124.237		209	348.417	76.863		209	301.872	73.645		209	339.551	167.232		209	121.901	49.967		209	93.975	92.651		209	71.811	156.593		209	185.29	74.227		209	48.317	361.651		209	207.454
210	120.128	133.317		210	233.608	80.806		210	276.606	61.747		210	255.771	117.752		210	348.417	77.539		210	301.872	74.75		210	339.551	167.781		210	121.901	48.385		210	93.975	85.755		210	71.811	144.309		210	185.29	69.809		210	48.317	368.752		210	207.454
211	120.128	130.365		211	233.608	79.469		211	276.606	61.494		211	255.771	121.425		211	348.417	77.333		211	301.872	75.302		211	339.551	167.783		211	121.901	50.058		211	93.975	94.033		211	71.811	155.556		211	185.29	76.05		211	48.317	368.385		211	207.454
212	120.128	128.668		212	233.608	81.554		212	276.606	62.088		212	255.771	122.518		212	348.417	75.528		212	301.872	73.016		212	339.551	165.24		212	121.901	51.505		212	93.975	95.047		212	71.811	157.58		212	185.29	71.94		212	48.317	374.431		212	207.454
213	120.128	129.177		213	233.608	81.178		213	276.606	59.795		213	255.771	121.853		213	348.417	77.515		213	301.872	72.796		213	339.551	168.531		213	121.901	51.938		213	93.975	87.406		213	71.811	154.673		213	185.29	74.156		213	48.317	378.459		213	207.454
214	120.128	123.823		214	233.608	85.302		214	276.606	61.296		214	255.771	121.066		214	348.417	77.901		214	301.872	75.705		214	339.551	167.424		214	121.901	52.702		214	93.975	91.755		214	71.811	152.963		214	185.29	74.99		214	48.317	381.761		214	207.454
215	120.128	120.303		215	233.608	84.516		215	276.606	60.535		215	255.771	119.532		215	348.417	75.459		215	301.872	72.476		215	339.551	168.191		215	121.901	52.142		215	93.975	92.693		215	71.811	149.247		215	185.29	72.057		215	48.317	387.312		215	207.454
216	120.128	123.424		216	233.608	82.368		216	276.606	63.248		216	255.771	124.596		216	348.417	77.463		216	301.872	73.545		216	339.551	171.372		216	121.901	50.833		216	93.975	97.179		216	71.811	151.716		216	185.29	68.471		216	48.317	378.193		216	207.454
217	120.128	120.384		217	233.608	86.493		217	276.606	60.429		217	255.771	120.813		217	348.417	77.253		217	301.872	73.93		217	339.551	170.414		217	121.901	52.684		217	93.975	93.604		217	71.811	159		217	185.29	68.617		217	48.317	372.239		217	207.454
218	120.128	122.823		218	233.608	88.013		218	276.606	60.718		218	255.771	118.977		218	348.417	77.328		218	301.872	74.233		218	339.551	172.174		218	121.901	49.338		218	93.975	93.665		218	71.811	163.099		218	185.29	69.522		218	48.317	389.78		218	207.454
219	120.128	118.601		219	233.608	90.051		219	276.606	61.5		219	255.771	119.873		219	348.417	77.576		219	301.872	73.113		219	339.551	172.432		219	121.901	49.52		219	93.975	96.019		219	71.811	160.167		219	185.29	69.435		219	48.317	389.495		219	207.454
220	120.128	123.007		220	233.608	91.915		220	276.606	61.234		220	255.771	125.343		220	348.417	78.69		220	301.872	74.411		220	339.551	173.133		220	121.901	51.756		220	93.975	89.877		220	71.811	158.006		220	185.29	67.962		220	48.317	381.853		220	207.454
221	120.128	122.391		221	233.608	93.228		221	276.606	63.896		221	255.771	120.399		221	348.417	78.802		221	301.872	75.225		221	339.551	170.633		221	121.901	53.993		221	93.975	91.269		221	71.811	152.71		221	185.29	67.273		221	48.317	388.55		221	207.454
222	120.128	119.041		222	233.608	96.195		222	276.606	62.279		222	255.771	118.742		222	348.417	77.816		222	301.872	73.253		222	339.551	169.247		222	121.901	54.185		222	93.975	90.349		222	71.811	148.889		222	185.29	69.543		222	48.317	377.761		222	207.454
223	120.128	119.653		223	233.608	92.945		223	276.606	64.01		223	255.771	122.241		223	348.417	81.344		223	301.872	74.272		223	339.551	165.208		223	121.901	49.291		223	93.975	90.34		223	71.811	159.099		223	185.29	74.081		223	48.317	371.037		223	207.454
224	120.128	120.185		224	233.608	94.643		224	276.606	60.502		224	255.771	121.184		224	348.417	78.405		224	301.872	75.532		224	339.551	162.967		224	121.901	52.945		224	93.975	91.151		224	71.811	159.241		224	185.29	71.876		224	48.317	363.037		224	207.454
225	120.128	124.199		225	233.608	94.67		225	276.606	61.292		225	255.771	120.359		225	348.417	78.964		225	301.872	72.279		225	339.551	162.222		225	121.901	52.687		225	93.975	90.104		225	71.811	153.432		225	185.29	69.335		225	48.317	370.339		225	207.454
226	120.128	125.439		226	233.608	90.226		226	276.606	61.929		226	255.771	122.57		226	348.417	77.774		226	301.872	74.705		226	339.551	157.995		226	121.901	53.676		226	93.975	90.363		226	71.811	156.21		226	185.29	68.761		226	48.317	386.239		226	207.454
227	120.128	126.162		227	233.608	93.645		227	276.606	63.003		227	255.771	119.437		227	348.417	76.243		227	301.872	75.73		227	339.551	146.993		227	121.901	51.327		227	93.975	88.717		227	71.811	155.877		227	185.29	70.562		227	48.317	371.046		227	207.454
228	120.128	120.565		228	233.608	93.135		228	276.606	60.567		228	255.771	122.91		228	348.417	78.144		228	301.872	72.288		228	339.551	145.037		228	121.901	53.658		228	93.975	86.005		228	71.811	154.815		228	185.29	69.022		228	48.317	365.055		228	207.454
229	120.128	125.362		229	233.608	90.414		229	276.606	59.569		229	255.771	119.035		229	348.417	83.299		229	301.872	74.963		229	339.551	146.214		229	121.901	52.335		229	93.975	93.684		229	71.811	155.84		229	185.29	67.596		229	48.317	355.578		229	207.454
230	120.128	127.804		230	233.608	89.645		230	276.606	60.617		230	255.771	119.038		230	348.417	79.365		230	301.872	73.059		230	339.551	146.043		230	121.901	49.593		230	93.975	91.222		230	71.811	154.932		230	185.29	66.151		230	48.317	359.183		230	207.454
231	120.128	127.616		231	233.608	88.738		231	276.606	62.715		231	255.771	121.964		231	348.417	82.865		231	301.872	72.841		231	339.551	146.261		231	121.901	54.767		231	93.975	88.495		231	71.811	153.235		231	185.29	67.189		231	48.317	355.174		231	207.454
232	120.128	125.085		232	233.608	90.015		232	276.606	64.192		232	255.771	118.128		232	348.417	78.962		232	301.872	73.157		232	339.551	144.406		232	121.901	53.24		232	93.975	93.604		232	71.811	153.123		232	185.29	69.457		232	48.317	360.018		232	207.454
233	120.128	124.535		233	233.608	85.596		233	276.606	63.979		233	255.771	118.035		233	348.417	79.17		233	301.872	74.313		233	339.551	143.591		233	121.901	54.869		233	93.975	88.877		233	71.811	143.111		233	185.29	68.852		233	48.317	367.294		233	207.454
234	120.128	118.727		234	233.608	89.732		234	276.606	63.022		234	255.771	119.116		234	348.417	77.594		234	301.872	74.037		234	339.551	144.903		234	121.901	54.876		234	93.975	88.25		234	71.811	149.938		234	185.29	69.914		234	48.317	356.826		234	207.454
235	120.128	118.871		235	233.608	87.214		235	276.606	63.109		235	255.771	121.627		235	348.417	81.531		235	301.872	73.474		235	339.551	144.76		235	121.901	53.244		235	93.975	91.675		235	71.811	148.907		235	185.29	65.275		235	48.317	345.266		235	207.454
236	120.128	116.262		236	233.608	86.966		236	276.606	62.724		236	255.771	118.582		236	348.417	78.062		236	301.872	73.557		236	339.551	144.227		236	121.901	54.153		236	93.975	87.953		236	71.811	157.568		236	185.29	69.598		236	48.317	370.147		236	207.454
237	120.128	121.07		237	233.608	82.028		237	276.606	62.228		237	255.771	118.303		237	348.417	81.084		237	301.872	73.642		237	339.551	139.52		237	121.901	52.018		237	93.975	89.075		237	71.811	154.525		237	185.29	68.129		237	48.317	357.266		237	207.454
238	120.128	115.738		238	233.608	84.493		238	276.606	62.524		238	255.771	118.244		238	348.417	80.274		238	301.872	76.628		238	339.551	143.529		238	121.901	54.269		238	93.975	91.028		238	71.811	150.29		238	185.29	70.84		238	48.317	365.972		238	207.454
239	120.128	115.14		239	233.608	82.338		239	276.606	61.897		239	255.771	116.236		239	348.417	81.13		239	301.872	74.054		239	339.551	141.248		239	121.901	55.44		239	93.975	86.769		239	71.811	158.698		239	185.29	68.313		239	48.317	348.596		239	207.454
240	120.128	120.424		240	233.608	82.471		240	276.606	61.035		240	255.771	116.248		240	348.417	79.19		240	301.872	76.778		240	339.551	142.316		240	121.901	54.767		240	93.975	86.392		240	71.811	153.654		240	185.29	69.428		240	48.317	376.229		240	207.454
241	120.128	124.406		241	233.608	83.317		241	276.606	60.962		241	255.771	118.757		241	348.417	82.598		241	301.872	74.796		241	339.551	138.35		241	121.901	56.065		241	93.975	85.958		241	71.811	152.401		241	185.29	66.864		241	48.317	361.312		241	207.454
242	120.128	120.753		242	233.608	85.317		242	276.606	61.481		242	255.771	118.986		242	348.417	80.243		242	301.872	73.558		242	339.551	139.415		242	121.901	54.291		242	93.975	82.542		242	71.811	151.228		242	185.29	67.62		242	48.317	375.991		242	207.454
243	120.128	123.989		243	233.608	85.964		243	276.606	59.774		243	255.771	117.79		243	348.417	79.794		243	301.872	75.916		243	339.551	136.877		243	121.901	53.531		243	93.975	83.873		243	71.811	160.167		243	185.29	66.05		243	48.317	359.523		243	207.454
244	120.128	122.096		244	233.608	82.518		244	276.606	60.723		244	255.771	114.712		244	348.417	79.375		244	301.872	74.354		244	339.551	139.766		244	121.901	54.964		244	93.975	79.858		244	71.811	152.747		244	185.29	64.452		244	48.317	360.239		244	207.454
245	120.128	123.745		245	233.608	82.52		245	276.606	59.032		245	255.771	117.435		245	348.417	78.877		245	301.872	74.536		245	339.551	138.291		245	121.901	52.811		245	93.975	89.741		245	71.811	154.062		245	185.29	63.146		245	48.317	356.688		245	207.454
246	120.128	118.679		246	233.608	83.078		246	276.606	60.388		246	255.771	115.922		246	348.417	78.05		246	301.872	73.364		246	339.551	134.681		246	121.901	51.611		246	93.975	90.608		246	71.811	155.5		246	185.29	68.232		246	48.317	362.183		246	207.454
247	120.128	124.387		247	233.608	84.681		247	276.606	58.888		247	255.771	115.26		247	348.417	79.963		247	301.872	72.269		247	339.551	136.354		247	121.901	52.149		247	93.975	81.642		247	71.811	153.259		247	185.29	67.211		247	48.317	359.927		247	207.454
248	120.128	133.443		248	233.608	82.805		248	276.606	58.639		248	255.771	118.931		248	348.417	83.623		248	301.872	73.791		248	339.551	130.086		248	121.901	56.484		248	93.975	85.198		248	71.811	156.241		248	185.29	67.055		248	48.317	367.018		248	207.454
249	120.128	133.148		249	233.608	81.036		249	276.606	57.925		249	255.771	116.326		249	348.417	80.844		249	301.872	74.401		249	339.551	130.026		249	121.901	53.622		249	93.975	86.736		249	71.811	151.302		249	185.29	65.935		249	48.317	350.596		249	207.454
250	120.128	132.708		250	233.608	82.81		250	276.606	57.494		250	255.771	117.286		250	348.417	80.871		250	301.872	74.094		250	339.551	130.149		250	121.901	50.16		250	93.975	84.057		250	71.811	150.864		250	185.29	63.313		250	48.317	371.624		250	207.454
251	120.128	146.672		251	233.608	78.615		251	276.606	59.253		251	255.771	119.794		251	348.417	80.779		251	301.872	76.844		251	339.551	128.003		251	121.901	50.956		251	93.975	81.292		251	71.811	151.117		251	185.29	65.036		251	48.317	343.339		251	207.454
252	120.128	140.336		252	233.608	81.264		252	276.606	61.524		252	255.771	117.695		252	348.417	76.625		252	301.872	74.192		252	339.551	134.842		252	121.901	50.382		252	93.975	84.434		252	71.811	149.377		252	185.29	62.132		252	48.317	355.44		252	207.454
253	120.128	143.196		253	233.608	82.245		253	276.606	60.228		253	255.771	114.946		253	348.417	80.758		253	301.872	73.931		253	339.551	139.693		253	121.901	52.393		253	93.975	88.623		253	71.811	155.043		253	185.29	61.844		253	48.317	369.569		253	207.454
254	120.128	144.048		254	233.608	77.507		254	276.606	60.784		254	255.771	117.854		254	348.417	81.846		254	301.872	71.928		254	339.551	146.621		254	121.901	49.96		254	93.975	84.123		254	71.811	157.099		254	185.29	61.385		254	48.317	359.239		254	207.454
255	120.128	134.004		255	233.608	78.721		255	276.606	62.561		255	255.771	119.288		255	348.417	79.921		255	301.872	74.361		255	339.551	149.102		255	121.901	54.105		255	93.975	82.467		255	71.811	148.13		255	185.29	62.459		255	48.317	353.587		255	207.454
256	120.128	134.402		256	233.608	80.846		256	276.606	60.268		256	255.771	117.471		256	348.417	78.887		256	301.872	74.596		256	339.551	144.965		256	121.901	49.658		256	93.975	84.5		256	71.811	150.216		256	185.29	62.847		256	48.317	360.78		256	207.454
257	120.128	141.886		257	233.608	80.089		257	276.606	61.736		257	255.771	116.65		257	348.417	81.813		257	301.872	75.22		257	339.551	147.07		257	121.901	47.873		257	93.975	82.189		257	71.811	153.006		257	185.29	62.969		257	48.317	361.156		257	207.454
258	120.128	139.325		258	233.608	79.311		258	276.606	59.197		258	255.771	120.334		258	348.417	78.533		258	301.872	73.573		258	339.551	148.674		258	121.901	49.24		258	93.975	88.542		258	71.811	144.883		258	185.29	63.589		258	48.317	345.798		258	207.454
259	120.128	140.295		259	233.608	82.584		259	276.606	59.627		259	255.771	118.125		259	348.417	78.958		259	301.872	76.098		259	339.551	153.03		259	121.901	52.451		259	93.975	89.005		259	71.811	146.821		259	185.29	63.909		259	48.317	354.303		259	207.454
260	120.128	136.251		260	233.608	78.203		260	276.606	59.963		260	255.771	121.931		260	348.417	79.501		260	301.872	73.978		260	339.551	158.07		260	121.901	49.975		260	93.975	87.873		260	71.811	154.296		260	185.29	62.789		260	48.317	356.716		260	207.454
261	120.128	141.627		261	233.608	75.556		261	276.606	62.665		261	255.771	118.86		261	348.417	79.494		261	301.872	74.07		261	339.551	164.807		261	121.901	48.942		261	93.975	84.316		261	71.811	155.086		261	185.29	62.206		261	48.317	359.376		261	207.454
262	120.128	143.93		262	233.608	72.835		262	276.606	61.188		262	255.771	122.031		262	348.417	79.347		262	301.872	74.006		262	339.551	168.621		262	121.901	46.029		262	93.975	79.811		262	71.811	153.525		262	185.29	66.605		262	48.317	358.954		262	207.454
263	120.128	137.768		263	233.608	74.825		263	276.606	60.285		263	255.771	121.73		263	348.417	80.17		263	301.872	71.574		263	339.551	177.966		263	121.901	48.295		263	93.975	85.991		263	71.811	156.142		263	185.29	62.964		263	48.317	359.725		263	207.454
264	120.128	138.727		264	233.608	73.042		264	276.606	60.615		264	255.771	120.997		264	348.417	79.555		264	301.872	72.852		264	339.551	182.319		264	121.901	51.418		264	93.975	89.665		264	71.811	150.877		264	185.29	64.321		264	48.317	339.083		264	207.454
265	120.128	129.598		265	233.608	72.482		265	276.606	62.899		265	255.771	119.756		265	348.417	80.027		265	301.872	72.953		265	339.551	181.373		265	121.901	48.287		265	93.975	85.042		265	71.811	155.204		265	185.29	65.378		265	48.317	348.56		265	207.454
266	120.128	136.059		266	233.608	71.309		266	276.606	61.607		266	255.771	122.704		266	348.417	79.85		266	301.872	72.912		266	339.551	184.736		266	121.901	52.073		266	93.975	81.288		266	71.811	147.049		266	185.29	67.045		266	48.317	360.44		266	207.454
267	120.128	132.277		267	233.608	73.905		267	276.606	59.837		267	255.771	117.586		267	348.417	79.438		267	301.872	74.264		267	339.551	184.906		267	121.901	49.716		267	93.975	86.344		267	71.811	155.827		267	185.29	68.165		267	48.317	355.385		267	207.454
268	120.128	129.052		268	233.608	73.972		268	276.606	58.194		268	255.771	117.858		268	348.417	79.583		268	301.872	71.192		268	339.551	193.556		268	121.901	53.004		268	93.975	79.972		268	71.811	149.451		268	185.29	68.706		268	48.317	365.422		268	207.454
269	120.128	130.066		269	233.608	76.482		269	276.606	59.103		269	255.771	123.634		269	348.417	78.548		269	301.872	71.796		269	339.551	196.048		269	121.901	52.64		269	93.975	88.085		269	71.811	145.759		269	185.29	67.538		269	48.317	355.725		269	207.454
270	120.128	122.801		270	233.608	75.683		270	276.606	58.683		270	255.771	116.071		270	348.417	79.98		270	301.872	73.564		270	339.551	193.505		270	121.901	51.844		270	93.975	83.906		270	71.811	151.463		270	185.29	65.689		270	48.317	360.67		270	207.454
271	120.128	126.199		271	233.608	78.827		271	276.606	59.793		271	255.771	117.856		271	348.417	79.548		271	301.872	73.465		271	339.551	196.706		271	121.901	50.476		271	93.975	85.425		271	71.811	144.414		271	185.29	66.94		271	48.317	359.541		271	207.454
272	120.128	122.325		272	233.608	77.75		272	276.606	58.731		272	255.771	120.232		272	348.417	78.715		272	301.872	71.263		272	339.551	195.397		272	121.901	52.975		272	93.975	87.5		272	71.811	148.42		272	185.29	66.904		272	48.317	380.817		272	207.454
273	120.128	124.756		273	233.608	79.393		273	276.606	57.072		273	255.771	121.435		273	348.417	80.389		273	301.872	71.893		273	339.551	200.711		273	121.901	49.382		273	93.975	86.623		273	71.811	149.136		273	185.29	69.179		273	48.317	367.422		273	207.454
274	120.128	125.948		274	233.608	79.626		274	276.606	60.965		274	255.771	120.042		274	348.417	80.903		274	301.872	71.182		274	339.551	207.178		274	121.901	51.073		274	93.975	85.142		274	71.811	156.753		274	185.29	65.462		274	48.317	367.257		274	207.454
275	120.128	128.476		275	233.608	79.135		275	276.606	60.179		275	255.771	120.099		275	348.417	80.338		275	301.872	71.266		275	339.551	208.402		275	121.901	50.698		275	93.975	80.038		275	71.811	150.636		275	185.29	66.684		275	48.317	378.596		275	207.454
276	120.128	124.638		276	233.608	81.586		276	276.606	60.394		276	255.771	119.217		276	348.417	78.573		276	301.872	72.079		276	339.551	205.084		276	121.901	50.964		276	93.975	88.665		276	71.811	146.296		276	185.29	66.041		276	48.317	360.688		276	207.454
277	120.128	124.196		277	233.608	82.786		277	276.606	61.583		277	255.771	119.579		277	348.417	83.074		277	301.872	72.355		277	339.551	207.751		277	121.901	52.255		277	93.975	81.967		277	71.811	135.506		277	185.29	66.273		277	48.317	362.679		277	207.454
278	120.128	121.93		278	233.608	84.089		278	276.606	62.234		278	255.771	115.331		278	348.417	80.365		278	301.872	71.963		278	339.551	205.751		278	121.901	50.891		278	93.975	79.731		278	71.811	151.302		278	185.29	63.928		278	48.317	365.734		278	207.454
279	120.128	121.258		279	233.608	82.45		279	276.606	61.208		279	255.771	118.728		279	348.417	79.602		279	301.872	70.25		279	339.551	200.924		279	121.901	52.225		279	93.975	83.467		279	71.811	150.34		279	185.29	66.335		279	48.317	380.119		279	207.454
280	120.128	122.339		280	233.608	83.814		280	276.606	61.401		280	255.771	116.839		280	348.417	79.43		280	301.872	73.405		280	339.551	191.128		280	121.901	51.553		280	93.975	84.005		280	71.811	153.222		280	185.29	68.435		280	48.317	355.046		280	207.454
281	120.128	126.494		281	233.608	81.808		281	276.606	60.856		281	255.771	119.173		281	348.417	79.603		281	301.872	73.342		281	339.551	195.695		281	121.901	55.287		281	93.975	81.085		281	71.811	152.512		281	185.29	64.574		281	48.317	362.174		281	207.454
282	120.128	122.483		282	233.608	84.636		282	276.606	60.997		282	255.771	116.945		282	348.417	79.739		282	301.872	74.43		282	339.551	195.448		282	121.901	53.295		282	93.975	80.288		282	71.811	154.63		282	185.29	63.974		282	48.317	377.193		282	207.454
283	120.128	127.804		283	233.608	81.452		283	276.606	61.587		283	255.771	119.898		283	348.417	78.26		283	301.872	73.602		283	339.551	195.226		283	121.901	53.731		283	93.975	82.217		283	71.811	153.611		283	185.29	65.117		283	48.317	367.046		283	207.454
284	120.128	133.849		284	233.608	86.943		284	276.606	60.522		284	255.771	111.915		284	348.417	78.447		284	301.872	73.488		284	339.551	198.757		284	121.901	53.876		284	93.975	81.373		284	71.811	155.809		284	185.29	65.766		284	48.317	360.826		284	207.454
285	120.128	127.904		285	233.608	82.226		285	276.606	63.062		285	255.771	115.957		285	348.417	77.601		285	301.872	70.78		285	339.551	205.269		285	121.901	51.527		285	93.975	79.373		285	71.811	157.352		285	185.29	65.737		285	48.317	375.596		285	207.454
286	120.128	120.849		286	233.608	85.776		286	276.606	63.176		286	255.771	115.071		286	348.417	78.193		286	301.872	75.047		286	339.551	202.941		286	121.901	50.345		286	93.975	79.094		286	71.811	152.963		286	185.29	66.39		286	48.317	376.083		286	207.454
287	120.128	119.561		287	233.608	88.269		287	276.606	62.207		287	255.771	116.724		287	348.417	79.622		287	301.872	72.275		287	339.551	204.567		287	121.901	50.193		287	93.975	81.642		287	71.811	157.432		287	185.29	64.048		287	48.317	364.404		287	207.454
288	120.128	123.31		288	233.608	86.433		288	276.606	62.138		288	255.771	114.516		288	348.417	77.289		288	301.872	71.554		288	339.551	201.471		288	121.901	49.313		288	93.975	79.505		288	71.811	154.889		288	185.29	65.115		288	48.317	381.716		288	207.454
289	120.128	124.081		289	233.608	87.632		289	276.606	59.502		289	255.771	119.026		289	348.417	75.489		289	301.872	74.263		289	339.551	205.749		289	121.901	51.902		289	93.975	76.783		289	71.811	160.333		289	185.29	66.383		289	48.317	373.413		289	207.454
290	120.128	119.125		290	233.608	84.67		290	276.606	59.864		290	255.771	117.69		290	348.417	76.823		290	301.872	71.849		290	339.551	199.725		290	121.901	51.505		290	93.975	75.693		290	71.811	152.802		290	185.29	64.022		290	48.317	358.826		290	207.454
291	120.128	112.775		291	233.608	87.958		291	276.606	59.385		291	255.771	115.088		291	348.417	77.799		291	301.872	73.443		291	339.551	198.884		291	121.901	47.425		291	93.975	79.156		291	71.811	149.765		291	185.29	67.213		291	48.317	369.22		291	207.454
292	120.128	112.601		292	233.608	89.368		292	276.606	59.83		292	255.771	114.291		292	348.417	78.149		292	301.872	73.833		292	339.551	196.49		292	121.901	49.382		292	93.975	82.458		292	71.811	152.494		292	185.29	62.273		292	48.317	366.294		292	207.454
293	120.128	106.675		293	233.608	89.038		293	276.606	60.271		293	255.771	115.381		293	348.417	77.448		293	301.872	73.651		293	339.551	194.392		293	121.901	49.411		293	93.975	75.519		293	71.811	155.216		293	185.29	60.739		293	48.317	372.046		293	207.454
294	120.128	120.218		294	233.608	88.176		294	276.606	58.99		294	255.771	118.542		294	348.417	79.103		294	301.872	71.913		294	339.551	190.896		294	121.901	51.127		294	93.975	76.165		294	71.811	164.389		294	185.29	63.486		294	48.317	372.963		294	207.454
295	120.128	124.251		295	233.608	86.243		295	276.606	60.484		295	255.771	119.125		295	348.417	77.221		295	301.872	72.424		295	339.551	184.321		295	121.901	53.295		295	93.975	81.764		295	71.811	153.34		295	185.29	61.627		295	48.317	353.193		295	207.454
296	120.128	123.387		296	233.608	84.188		296	276.606	62.893		296	255.771	119.243		296	348.417	78.687		296	301.872	72.628		296	339.551	178.479		296	121.901	50.655		296	93.975	78.708		296	71.811	160.241		296	185.29	62.053		296	48.317	357.881		296	207.454
297	120.128	125.321		297	233.608	84.937		297	276.606	56.745		297	255.771	117.977		297	348.417	78.622		297	301.872	70.661		297	339.551	173.768		297	121.901	51.702		297	93.975	78.17		297	71.811	151.568		297	185.29	63.38		297	48.317	379.56		297	207.454
298	120.128	125.557		298	233.608	84.778		298	276.606	60.207		298	255.771	116.674		298	348.417	77.458		298	301.872	73.576		298	339.551	172.162		298	121.901	50.575		298	93.975	76.877		298	71.811	162.864		298	185.29	62.711		298	48.317	363.945		298	207.454
299	120.128	124.461		299	233.608	84.843		299	276.606	63.447		299	255.771	115.889		299	348.417	76.91		299	301.872	71.853		299	339.551	166.581		299	121.901	53.084		299	93.975	80.901		299	71.811	151.605		299	185.29	61.72		299	48.317	352.899		299	207.454
300	120.128	122.535		300	233.608	75.793		300	276.606	62.75		300	255.771	117.662		300	348.417	77.282		300	301.872	72.297		300	339.551	156.979		300	121.901	50.404		300	93.975	76.118		300	71.811	162.426		300	185.29	61.146		300	48.317	365.358		300	207.454
301	120.128	116.288		301	233.608	81.027		301	276.606	57.484		301	255.771	113.447		301	348.417	76.925		301	301.872	73.213		301	339.551	154.38		301	121.901	51.625		301	93.975	81.972		301	71.811	151.84		301	185.29	61.232		301	48.317	358.284		301	207.454
302	120.128	111.83		302	233.608	80.002		302	276.606	59.111		302	255.771	116.203		302	348.417	76.634		302	301.872	72.768		302	339.551	154.031		302	121.901	51.109		302	93.975	80.41		302	71.811	155.111		302	185.29	60.115		302	48.317	381.028		302	207.454
303	120.128	113.461		303	233.608	78.275		303	276.606	59.755		303	255.771	117.102		303	348.417	75.598		303	301.872	73.612		303	339.551	146.499		303	121.901	52.018		303	93.975	81.085		303	71.811	159.63		303	185.29	59.727		303	48.317	385.229		303	207.454
304	120.128	113.664		304	233.608	78.96		304	276.606	60.082		304	255.771	113.154		304	348.417	77.351		304	301.872	71.581		304	339.551	145.698		304	121.901	50.549		304	93.975	79.835		304	71.811	160.105		304	185.29	61.072		304	48.317	352.174		304	207.454
305	120.128	121.919		305	233.608	74.285		305	276.606	61.293		305	255.771	116.071		305	348.417	78.346		305	301.872	73.429		305	339.551	148.483		305	121.901	48.851		305	93.975	80.575		305	71.811	151.815		305	185.29	59.28		305	48.317	358.881		305	207.454
306	120.128	118.114		306	233.608	77.18		306	276.606	61.019		306	255.771	115.775		306	348.417	77.355		306	301.872	72.424		306	339.551	148.803		306	121.901	53.295		306	93.975	84.863		306	71.811	155.438		306	185.29	61.045		306	48.317	358.927		306	207.454
307	120.128	115.196		307	233.608	79.455		307	276.606	58.742		307	255.771	117.872		307	348.417	76.472		307	301.872	71.561		307	339.551	146.734		307	121.901	51.836		307	93.975	89.59		307	71.811	159.87		307	185.29	62.077		307	48.317	362.826		307	207.454
308	120.128	123.631		308	233.608	78.205		308	276.606	61.269		308	255.771	116.255		308	348.417	76.985		308	301.872	70.743		308	339.551	145.869		308	121.901	49.982		308	93.975	81.736		308	71.811	165.13		308	185.29	62		308	48.317	358.339		308	207.454
309	120.128	120.908		309	233.608	77.472		309	276.606	60.425		309	255.771	114.667		309	348.417	78.827		309	301.872	71.401		309	339.551	149.516		309	121.901	51.473		309	93.975	81.896		309	71.811	160.815		309	185.29	64.122		309	48.317	349.119		309	207.454
310	120.128	119.993		310	233.608	79.609		310	276.606	60.957		310	255.771	114.395		310	348.417	76.86		310	301.872	72.348		310	339.551	147.101		310	121.901	50.116		310	93.975	81.75		310	71.811	161.117		310	185.29	63.553		310	48.317	367.954		310	207.454
311	120.128	118.096		311	233.608	80.858		311	276.606	61.62		311	255.771	118.719		311	348.417	76.728		311	301.872	70.601		311	339.551	150.675		311	121.901	52.36		311	93.975	84.024		311	71.811	154.198		311	185.29	63.967		311	48.317	360.202		311	207.454
312	120.128	115.69		312	233.608	79.552		312	276.606	59.596		312	255.771	118.114		312	348.417	75.561		312	301.872	72.332		312	339.551	152.316		312	121.901	53.124		312	93.975	81.849		312	71.811	155.907		312	185.29	62.124		312	48.317	354.844		312	207.454
313	120.128	116.823		313	233.608	79.824		313	276.606	58.236		313	255.771	114.31		313	348.417	73.779		313	301.872	70.646		313	339.551	163.278		313	121.901	51.989		313	93.975	84.542		313	71.811	149.691		313	185.29	63.653		313	48.317	351.404		313	207.454
314	120.128	120.369		314	233.608	78.757		314	276.606	59.019		314	255.771	115.341		314	348.417	76.557		314	301.872	70.028		314	339.551	158.961		314	121.901	52.629		314	93.975	85.175		314	71.811	154.253		314	185.29	61.66		314	48.317	353.982		314	207.454
315	120.128	121.295		315	233.608	77.598		315	276.606	58.638		315	255.771	113.882		315	348.417	77.224		315	301.872	71.786		315	339.551	160.636		315	121.901	51.356		315	93.975	80.307		315	71.811	151.383		315	185.29	62.584		315	48.317	345.202		315	207.454
316	120.128	119.576		316	233.608	78.454		316	276.606	59.657		316	255.771	113.882		316	348.417	77.211		316	301.872	72.489		316	339.551	160.244		316	121.901	53.705		316	93.975	85.825		316	71.811	151.549		316	185.29	61.089		316	48.317	362.055		316	207.454
317	120.128	120.159		317	233.608	75.548		317	276.606	58.564		317	255.771	114.927		317	348.417	75.569		317	301.872	70.411		317	339.551	162.217		317	121.901	51.985		317	93.975	78.708		317	71.811	149.71		317	185.29	61.364		317	48.317	346.569		317	207.454
318	120.128	122.554		318	233.608	81.387		318	276.606	60.905		318	255.771	113.7		318	348.417	78.559		318	301.872	70.336		318	339.551	167.362		318	121.901	50.731		318	93.975	78.792		318	71.811	157.173		318	185.29	62.593		318	48.317	352.89		318	207.454
319	120.128	121.904		319	233.608	80.529		319	276.606	59.974		319	255.771	111.477		319	348.417	79.878		319	301.872	70.815		319	339.551	172.228		319	121.901	48.684		319	93.975	78.368		319	71.811	153.469		319	185.29	65.945		319	48.317	357.826		319	207.454
320	120.128	125.893		320	233.608	79.285		320	276.606	57.282		320	255.771	115.873		320	348.417	76.649		320	301.872	71.054		320	339.551	175.33		320	121.901	52.556		320	93.975	82.505		320	71.811	152.994		320	185.29	63.026		320	48.317	347.716		320	207.454
321	120.128	120.823		321	233.608	83.668		321	276.606	58.478		321	255.771	117.497		321	348.417	77.808		321	301.872	73.617		321	339.551	177.346		321	121.901	52.811		321	93.975	79.764		321	71.811	154.42		321	185.29	62.158		321	48.317	357.817		321	207.454
322	120.128	127.93		322	233.608	78.484		322	276.606	56.946		322	255.771	113.501		322	348.417	78.938		322	301.872	71.414		322	339.551	180.85		322	121.901	54.96		322	93.975	80.868		322	71.811	147.228		322	185.29	65.565		322	48.317	344.706		322	207.454
323	120.128	120.295		323	233.608	78.729		323	276.606	58.503		323	255.771	113.591		323	348.417	78.739		323	301.872	69.74		323	339.551	188.264		323	121.901	50.073		323	93.975	81.179		323	71.811	144.667		323	185.29	62.218		323	48.317	336.752		323	207.454
324	120.128	117.786		324	233.608	77.135		324	276.606	57.567		324	255.771	115.624		324	348.417	78.953		324	301.872	71.214		324	339.551	194.795		324	121.901	51.684		324	93.975	83.344		324	71.811	152.352		324	185.29	60.077		324	48.317	352.431		324	207.454
325	120.128	115.875		325	233.608	76.131		325	276.606	57.712		325	255.771	114.18		325	348.417	77.995		325	301.872	69.302		325	339.551	194.533		325	121.901	54.098		325	93.975	78.34		325	71.811	152.154		325	185.29	60.194		325	48.317	338.651		325	207.454
326	120.128	117.151		326	233.608	76.262		326	276.606	58.889		326	255.771	112.237		326	348.417	76.557		326	301.872	71.322		326	339.551	201.073		326	121.901	52.582		326	93.975	83.83		326	71.811	150.019		326	185.29	60.789		326	48.317	348.651		326	207.454
327	120.128	118.199		327	233.608	75.789		327	276.606	56.05		327	255.771	112.785		327	348.417	77.902		327	301.872	71.399		327	339.551	203.153		327	121.901	53.255		327	93.975	83.25		327	71.811	155.13		327	185.29	61.825		327	48.317	343.605		327	207.454
328	120.128	114.731		328	233.608	74.693		328	276.606	55.587		328	255.771	113.154		328	348.417	76.369		328	301.872	72.433		328	339.551	200.607		328	121.901	53.585		328	93.975	83.958		328	71.811	155.864		328	185.29	61.572		328	48.317	340.972		328	207.454
329	120.128	116.985		329	233.608	76.436		329	276.606	57.362		329	255.771	115.182		329	348.417	77.466		329	301.872	72.605		329	339.551	201.604		329	121.901	51.167		329	93.975	86.288		329	71.811	163.543		329	185.29	61.687		329	48.317	337.862		329	207.454
330	120.128	116.314		330	233.608	74.825		330	276.606	55.114		330	255.771	111.903		330	348.417	79.883		330	301.872	70.377		330	339.551	192.816		330	121.901	52.611		330	93.975	86.778		330	71.811	153.204		330	185.29	61.854		330	48.317	349.183		330	207.454
331	120.128	120.904		331	233.608	77.981		331	276.606	59.381		331	255.771	115.991		331	348.417	78.496		331	301.872	72.812		331	339.551	194.802		331	121.901	52.436		331	93.975	84.288		331	71.811	152.735		331	185.29	60.344		331	48.317	357.908		331	207.454
332	120.128	121.004		332	233.608	77.871		332	276.606	55.776		332	255.771	117.21		332	348.417	77.188		332	301.872	73.532		332	339.551	191.974		332	121.901	51.542		332	93.975	85.028		332	71.811	145.926		332	185.29	60.55		332	48.317	346.881		332	207.454
333	120.128	117.162		333	233.608	78.774		333	276.606	54.806		333	255.771	117.66		333	348.417	77.291		333	301.872	71.493		333	339.551	186.328		333	121.901	52.738		333	93.975	91.689		333	71.811	153.71		333	185.29	60.428		333	48.317	353.514		333	207.454
334	120.128	115.815		334	233.608	78.047		334	276.606	54.79		334	255.771	113.624		334	348.417	75.753		334	301.872	70.154		334	339.551	190.474		334	121.901	51.462		334	93.975	91.509		334	71.811	155.21		334	185.29	59.761		334	48.317	334.404		334	207.454
335	120.128	118.232		335	233.608	80.761		335	276.606	54.47		335	255.771	112.551		335	348.417	75.238		335	301.872	70.512		335	339.551	187.504		335	121.901	51.629		335	93.975	85.741		335	71.811	149.704		335	185.29	62.182		335	48.317	327.174		335	207.454
336	120.128	111.384		336	233.608	80.226		336	276.606	52.955		336	255.771	111.501		336	348.417	76.218		336	301.872	71.778		336	339.551	186.074		336	121.901	48.516		336	93.975	81.354		336	71.811	161.019		336	185.29	62.658		336	48.317	355.78		336	207.454
337	120.128	117.17		337	233.608	80.015		337	276.606	53.63		337	255.771	116.477		337	348.417	76.539		337	301.872	70.455		337	339.551	184.832		337	121.901	50.785		337	93.975	87.274		337	71.811	149.111		337	185.29	62.574		337	48.317	332.477		337	207.454
338	120.128	117.738		338	233.608	84.45		338	276.606	54.854		338	255.771	115.045		338	348.417	78.272		338	301.872	70.264		338	339.551	187.692		338	121.901	52.345		338	93.975	88.033		338	71.811	152.222		338	185.29	62.395		338	48.317	337.532		338	207.454
339	120.128	119.542		339	233.608	81.81		339	276.606	54.846		339	255.771	114.179		339	348.417	76.448		339	301.872	71.088		339	339.551	185.094		339	121.901	51.033		339	93.975	88.288		339	71.811	153.062		339	185.29	65.091		339	48.317	338.239		339	207.454
340	120.128	118.321		340	233.608	82.835		340	276.606	52.146		340	255.771	111.929		340	348.417	78.545		340	301.872	72.207		340	339.551	183.701		340	121.901	51.058		340	93.975	91.736		340	71.811	158.457		340	185.29	67.024		340	48.317	330.908		340	207.454
341	120.128	112.911		341	233.608	86.099		341	276.606	54.314		341	255.771	110.35		341	348.417	77.337		341	301.872	71.59		341	339.551	184.585		341	121.901	48.869		341	93.975	84.675		341	71.811	145.969		341	185.29	66.16		341	48.317	335.862		341	207.454
342	120.128	113.399		342	233.608	85.48		342	276.606	54.221		342	255.771	113.163		342	348.417	76.011		342	301.872	70.938		342	339.551	186.072		342	121.901	49.269		342	93.975	87.024		342	71.811	160.574		342	185.29	68.505		342	48.317	325.505		342	207.454
343	120.128	120.428		343	233.608	82.195		343	276.606	55.144		343	255.771	111.111		343	348.417	76.546		343	301.872	70.113		343	339.551	183.864		343	121.901	49.865		343	93.975	91.429		343	71.811	151.327		343	185.29	65.574		343	48.317	333.459		343	207.454
344	120.128	123.188		344	233.608	82.241		344	276.606	53.902		344	255.771	114.023		344	348.417	76.847		344	301.872	69.602		344	339.551	183.758		344	121.901	49.698		344	93.975	86.722		344	71.811	159.642		344	185.29	66.801		344	48.317	339.266		344	207.454
345	120.128	124.683		345	233.608	84.905		345	276.606	56.321		345	255.771	112.501		345	348.417	76.561		345	301.872	69.219		345	339.551	185.124		345	121.901	49.844		345	93.975	85.241		345	71.811	155.204		345	185.29	66.115		345	48.317	343.541		345	207.454
346	120.128	119.845		346	233.608	83.558		346	276.606	54.812		346	255.771	112.47		346	348.417	77.018		346	301.872	68.009		346	339.551	183.133		346	121.901	49.178		346	93.975	88.745		346	71.811	154.444		346	185.29	62.273		346	48.317	346.119		346	207.454
347	120.128	120.494		347	233.608	80.573		347	276.606	53.288		347	255.771	111.111		347	348.417	76.447		347	301.872	68.893		347	339.551	187.219		347	121.901	49.771		347	93.975	78.033		347	71.811	154.099		347	185.29	60.505		347	48.317	334.605		347	207.454
348	120.128	122.948		348	233.608	79.402		348	276.606	53.486		348	255.771	110.097		348	348.417	76.959		348	301.872	70.524		348	339.551	185.945		348	121.901	51.775		348	93.975	86.877		348	71.811	149.228		348	185.29	66.366		348	48.317	339.578		348	207.454
349	120.128	121.177		349	233.608	79.939		349	276.606	53.71		349	255.771	111.865		349	348.417	78.276		349	301.872	69.946		349	339.551	183.768		349	121.901	51.622		349	93.975	83.462		349	71.811	149.796		349	185.29	62.158		349	48.317	350.55		349	207.454
350	120.128	119.646		350	233.608	77.309		350	276.606	54.103		350	255.771	113.686		350	348.417	76.226		350	301.872	70.043		350	339.551	181.594		350	121.901	47.975		350	93.975	86.486		350	71.811	149.926		350	185.29	61.368		350	48.317	346.477		350	207.454
351	120.128	119.292		351	233.608	77.154		351	276.606	54.449		351	255.771	110.799		351	348.417	76.471		351	301.872	70.377		351	339.551	181.406		351	121.901	51.651		351	93.975	80.429		351	71.811	148.34		351	185.29	62.225		351	48.317	339.624		351	207.454
352	120.128	120.17		352	233.608	76.833		352	276.606	54.482		352	255.771	114.263		352	348.417	76.233		352	301.872	70.361		352	339.551	183.249		352	121.901	49.004		352	93.975	78.75		352	71.811	150.117		352	185.29	64.868		352	48.317	330.761		352	207.454
353	120.128	118.952		353	233.608	75.465		353	276.606	53.529		353	255.771	113.496		353	348.417	75.552		353	301.872	71.107		353	339.551	185.993		353	121.901	48.458		353	93.975	82.038		353	71.811	160.42		353	185.29	66.797		353	48.317	331.303		353	207.454
354	120.128	120.221		354	233.608	76.772		354	276.606	55.319		354	255.771	113.981		354	348.417	75.34		354	301.872	69.539		354	339.551	179.638		354	121.901	49.727		354	93.975	79.042		354	71.811	157.741		354	185.29	63.222		354	48.317	347.028		354	207.454
355	120.128	111.76		355	233.608	76.746		355	276.606	52.276		355	255.771	119.158		355	348.417	75.504		355	301.872	71.291		355	339.551	176.862		355	121.901	51.549		355	93.975	84.212		355	71.811	158.735		355	185.29	65.806		355	48.317	327.119		355	207.454
356	120.128	115.052		356	233.608	76.129		356	276.606	55.748		356	255.771	113.227		356	348.417	74.228		356	301.872	68.784		356	339.551	178.289		356	121.901	51.251		356	93.975	81.547		356	71.811	156.401		356	185.29	68.447		356	48.317	331.844		356	207.454
357	120.128	117.055		357	233.608	82.319		357	276.606	55.867		357	255.771	116.705		357	348.417	76.515		357	301.872	69.562		357	339.551	175.95		357	121.901	53.302		357	93.975	79.915		357	71.811	158.451		357	185.29	70.098		357	48.317	326.248		357	207.454
358	120.128	116.801		358	233.608	82.435		358	276.606	55.712		358	255.771	116.184		358	348.417	79.28		358	301.872	70.247		358	339.551	179.264		358	121.901	53.415		358	93.975	83.127		358	71.811	157.414		358	185.29	71.481		358	48.317	316.927		358	207.454
359	120.128	116.114		359	233.608	83.042		359	276.606	55.763		359	255.771	118.205		359	348.417	77.607		359	301.872	70.14		359	339.551	177.569		359	121.901	53.538		359	93.975	81.83		359	71.811	152.117		359	185.29	70.316		359	48.317	325.404		359	207.454
360	120.128	121.672		360	233.608	81.008		360	276.606	54.546		360	255.771	118.348		360	348.417	77.861		360	301.872	70.515		360	339.551	178.758		360	121.901	53.538		360	93.975	81.175		360	71.811	154.123		360	185.29	72.108		360	48.317	329.541		360	207.454
361	120.128	118.941		361	233.608	82.85		361	276.606	54.49		361	255.771	121.61		361	348.417	78.72		361	301.872	70.219		361	339.551	176.258		361	121.901	52.367		361	93.975	79.646		361	71.811	153.105		361	185.29	69.529		361	48.317	327.257		361	207.454
362	120.128	120.517		362	233.608	85.776		362	276.606	57.479		362	255.771	118.653		362	348.417	79.525		362	301.872	69.532		362	339.551	172.769		362	121.901	51.284		362	93.975	81.698		362	71.811	153.858		362	185.29	67.914		362	48.317	332.239		362	207.454
363	120.128	119.838		363	233.608	87.013		363	276.606	57.087		363	255.771	115.825		363	348.417	74.631		363	301.872	68.721		363	339.551	172.845		363	121.901	54.24		363	93.975	78.915		363	71.811	152.685		363	185.29	69.608		363	48.317	324.101		363	207.454
364	120.128	115.144		364	233.608	88.197		364	276.606	55.502		364	255.771	119.598		364	348.417	77.851		364	301.872	67.88		364	339.551	170.06		364	121.901	52.28		364	93.975	76.854		364	71.811	152.506		364	185.29	67.428		364	48.317	336.404		364	207.454
365	120.128	123.845		365	233.608	87.361		365	276.606	55.05		365	255.771	120.175		365	348.417	79.399		365	301.872	69.236		365	339.551	171.98		365	121.901	52.556		365	93.975	80.854		365	71.811	149.29		365	185.29	71.215		365	48.317	319.33		365	207.454
366	120.128	119.022		366	233.608	88.051		366	276.606	56.224		366	255.771	116.686		366	348.417	75.17		366	301.872	68.535		366	339.551	172.465		366	121.901	50.818		366	93.975	80.368		366	71.811	152.407		366	185.29	70.95		366	48.317	336.633		366	207.454
367	120.128	118.144		367	233.608	90.214		367	276.606	54.62		367	255.771	120.198		367	348.417	77.233		367	301.872	67.828		367	339.551	171.389		367	121.901	51.727		367	93.975	80.948		367	71.811	155.216		367	185.29	72.388		367	48.317	324.44		367	207.454
368	120.128	120.439		368	233.608	88.85		368	276.606	55.646		368	255.771	120.456		368	348.417	80.637		368	301.872	68.789		368	339.551	172.345		368	121.901	49.349		368	93.975	76.354		368	71.811	149.58		368	185.29	71.718		368	48.317	331.064		368	207.454
369	120.128	111.041		369	233.608	87.507		369	276.606	54.636		369	255.771	117.485		369	348.417	76.744		369	301.872	68.841		369	339.551	173.836		369	121.901	50.451		369	93.975	80.255		369	71.811	154.531		369	185.29	70.191		369	48.317	328.55		369	207.454
370	120.128	116.934		370	233.608	84.75		370	276.606	56.274		370	255.771	118.282		370	348.417	79.184		370	301.872	69.198		370	339.551	179.123		370	121.901	49.738		370	93.975	83.774		370	71.811	155.556		370	185.29	72.876		370	48.317	338.963		370	207.454
371	120.128	119.476		371	233.608	87.12		371	276.606	55.835		371	255.771	118.243		371	348.417	77.863		371	301.872	69.479		371	339.551	183.121		371	121.901	50.309		371	93.975	83.108		371	71.811	156.457		371	185.29	72.911		371	48.317	340.936		371	207.454
372	120.128	117.768		372	233.608	87.025		372	276.606	53.598		372	255.771	119.064		372	348.417	78.542		372	301.872	66.927		372	339.551	183.155		372	121.901	48.229		372	93.975	84.429		372	71.811	153.506		372	185.29	72.751		372	48.317	352.046		372	207.454
373	120.128	118.454		373	233.608	84.651		373	276.606	55.784		373	255.771	115.83		373	348.417	78.029		373	301.872	70.12		373	339.551	190.127		373	121.901	50.611		373	93.975	83.972		373	71.811	153.401		373	185.29	74.175		373	48.317	342.853		373	207.454
374	120.128	114.483		374	233.608	83.472		374	276.606	54.269		374	255.771	117.451		374	348.417	78.695		374	301.872	67.189		374	339.551	194.419		374	121.901	48.029		374	93.975	91.363		374	71.811	146.315		374	185.29	71.435		374	48.317	330.78		374	207.454
375	120.128	122.399		375	233.608	84.875		375	276.606	54.202		375	255.771	116.378		375	348.417	75.691		375	301.872	68.902		375	339.551	194.671		375	121.901	49.756		375	93.975	86.519		375	71.811	157.691		375	185.29	68.715		375	48.317	321.376		375	207.454
376	120.128	123.402		376	233.608	82.994		376	276.606	53.857		376	255.771	115.932		376	348.417	77.146		376	301.872	68.442		376	339.551	195.383		376	121.901	50.385		376	93.975	82.995		376	71.811	150.679		376	185.29	68.108		376	48.317	336.046		376	207.454
377	120.128	126.576		377	233.608	84.535		377	276.606	54.606		377	255.771	116.764		377	348.417	78.158		377	301.872	68.979		377	339.551	198.876		377	121.901	45.945		377	93.975	87.226		377	71.811	149.611		377	185.29	70.203		377	48.317	329.395		377	207.454
378	120.128	129.137		378	233.608	83.981		378	276.606	52.755		378	255.771	117.653		378	348.417	76.095		378	301.872	70.768		378	339.551	198.53		378	121.901	48.531		378	93.975	92.066		378	71.811	156.37		378	185.29	70.134		378	48.317	350.477		378	207.454
379	120.128	119.328		379	233.608	82.427		379	276.606	53.223		379	255.771	117.638		379	348.417	77.595		379	301.872	70.532		379	339.551	195.065		379	121.901	47.88		379	93.975	90.962		379	71.811	153.796		379	185.29	72.696		379	48.317	342.954		379	207.454
380	120.128	117.232		380	233.608	86.112		380	276.606	55.542		380	255.771	113.737		380	348.417	77.274		380	301.872	69.668		380	339.551	193.027		380	121.901	47.196		380	93.975	91.708		380	71.811	157.21		380	185.29	71.33		380	48.317	323.413		380	207.454
381	120.128	112.517		381	233.608	83.44		381	276.606	54.006		381	255.771	113.789		381	348.417	79.461		381	301.872	69.875		381	339.551	190.305		381	121.901	47.655		381	93.975	94.019		381	71.811	158.383		381	185.29	69.182		381	48.317	320.569		381	207.454
382	120.128	117.413		382	233.608	85.486		382	276.606	54.779		382	255.771	112.269		382	348.417	79.762		382	301.872	70.442		382	339.551	187.414		382	121.901	47.356		382	93.975	92.33		382	71.811	155.259		382	185.29	66.151		382	48.317	335.33		382	207.454
383	120.128	122.387		383	233.608	85.342		383	276.606	54.324		383	255.771	113.023		383	348.417	76.818		383	301.872	68.25		383	339.551	185.362		383	121.901	45.229		383	93.975	90.948		383	71.811	164.463		383	185.29	71.225		383	48.317	332.477		383	207.454
384	120.128	119.517		384	233.608	84.25		384	276.606	52.561		384	255.771	115.629		384	348.417	78.125		384	301.872	70.664		384	339.551	181.748		384	121.901	46.389		384	93.975	88.66		384	71.811	160.296		384	185.29	67.239		384	48.317	334.826		384	207.454
385	120.128	123.428		385	233.608	82.674		385	276.606	55.764		385	255.771	114.899		385	348.417	78.966		385	301.872	68.267		385	339.551	180.056		385	121.901	46.851		385	93.975	88.038		385	71.811	156.907		385	185.29	70.519		385	48.317	341.413		385	207.454
386	120.128	124.273		386	233.608	84.023		386	276.606	55.641		386	255.771	114.211		386	348.417	78.232		386	301.872	70.72		386	339.551	186.577		386	121.901	45.516		386	93.975	87.783		386	71.811	155.111		386	185.29	69.505		386	48.317	338.881		386	207.454
387	120.128	121.967		387	233.608	85.721		387	276.606	55.659		387	255.771	109.078		387	348.417	77.947		387	301.872	68.31		387	339.551	186.648		387	121.901	47.142		387	93.975	82.085		387	71.811	163.525		387	185.29	68.708		387	48.317	332.211		387	207.454
388	120.128	117.72		388	233.608	84.934		388	276.606	53.027		388	255.771	110.456		388	348.417	78.093		388	301.872	70.154		388	339.551	176.437		388	121.901	45.433		388	93.975	86.929		388	71.811	157.654		388	185.29	72.433		388	48.317	341.284		388	207.454
389	120.128	122.871		389	233.608	83.025		389	276.606	57.833		389	255.771	119.998		389	348.417	76.917		389	301.872	67.073		389	339.551	178.593		389	121.901	47.553		389	93.975	86.208		389	71.811	151.315		389	185.29	70.014		389	48.317	332.294		389	207.454
390	120.128	126.996		390	233.608	81.205		390	276.606	55.256		390	255.771	114.218		390	348.417	76.333		390	301.872	68.194		390	339.551	175.461		390	121.901	46.964		390	93.975	83.429		390	71.811	164.012		390	185.29	69.072		390	48.317	339.44		390	207.454
391	120.128	127.812		391	233.608	86.199		391	276.606	53.511		391	255.771	114.75		391	348.417	77.008		391	301.872	69.617		391	339.551	174.983		391	121.901	43.76		391	93.975	89.623		391	71.811	154.833		391	185.29	66.048		391	48.317	337.927		391	207.454
392	120.128	126.439		392	233.608	87.059		392	276.606	54.045		392	255.771	113.445		392	348.417	77.067		392	301.872	67.962		392	339.551	177.439		392	121.901	44.105		392	93.975	87.887		392	71.811	157.747		392	185.29	70.282		392	48.317	340.633		392	207.454
393	120.128	124.137		393	233.608	89.455		393	276.606	55.519		393	255.771	116.43		393	348.417	77.882		393	301.872	68.661		393	339.551	177.645		393	121.901	45.702		393	93.975	85.858		393	71.811	159.154		393	185.29	68.041		393	48.317	344.128		393	207.454
394	120.128	123.849		394	233.608	91.241		394	276.606	52.559		394	255.771	113.069		394	348.417	76.768		394	301.872	69.345		394	339.551	181.92		394	121.901	43.644		394	93.975	88.354		394	71.811	152.864		394	185.29	69.278		394	48.317	325.688		394	207.454
395	120.128	121.69		395	233.608	85.002		395	276.606	52.018		395	255.771	107.614		395	348.417	77.917		395	301.872	68.836		395	339.551	183.215		395	121.901	48.411		395	93.975	85.66		395	71.811	154.895		395	185.29	69.232		395	48.317	344.422		395	207.454
396	120.128	118.937		396	233.608	90.222		396	276.606	54.66		396	255.771	109.572		396	348.417	78.495		396	301.872	71.084		396	339.551	190.898		396	121.901	48.28		396	93.975	83.038		396	71.811	157.877		396	185.29	67.378		396	48.317	325.89		396	207.454
397	120.128	123.93		397	233.608	89.275		397	276.606	52.835		397	255.771	112.331		397	348.417	80.333		397	301.872	70.746		397	339.551	201.145		397	121.901	45.342		397	93.975	86.778		397	71.811	159.654		397	185.29	67.211		397	48.317	341.22		397	207.454
398	120.128	115.959		398	233.608	89.097		398	276.606	51.973		398	255.771	110.972		398	348.417	78.207		398	301.872	70.57		398	339.551	200.278		398	121.901	45.102		398	93.975	87.071		398	71.811	146.352		398	185.29	70.455		398	48.317	334.899		398	207.454
399	120.128	118.694		399	233.608	89.315		399	276.606	51.679		399	255.771	109.144		399	348.417	78.517		399	301.872	69.454		399	339.551	203.137		399	121.901	49.429		399	93.975	82.193		399	71.811	159.358		399	185.29	67.301		399	48.317	341.064		399	207.454
400	120.128	112.764		400	233.608	87.782		400	276.606	52.409		400	255.771	110.248		400	348.417	73.681		400	301.872	70.953		400	339.551	209.8		400	121.901	45.553		400	93.975	86.344		400	71.811	151.451		400	185.29	68.459		400	48.317	327.459		400	207.454
401	120.128	116.469		401	233.608	89.992		401	276.606	49.982		401	255.771	110.295		401	348.417	78.826		401	301.872	70.554		401	339.551	199.106		401	121.901	46.015		401	93.975	87.118		401	71.811	151.241		401	185.29	67.321		401	48.317	325.064		401	207.454
402	120.128	116.074		402	233.608	84.742		402	276.606	49.79		402	255.771	108.139		402	348.417	77.078		402	301.872	71.962		402	339.551	203.461		402	121.901	45.327		402	93.975	88.453		402	71.811	148.698		402	185.29	70.12		402	48.317	326.578		402	207.454
403	120.128	118.498		403	233.608	90.226		403	276.606	52.114		403	255.771	113.149		403	348.417	75.445		403	301.872	69.446		403	339.551	199.736		403	121.901	45.684		403	93.975	89.792		403	71.811	155.741		403	185.29	67.031		403	48.317	336.514		403	207.454
404	120.128	121.092		404	233.608	88.685		404	276.606	52.5		404	255.771	109.199		404	348.417	78.748		404	301.872	69.543		404	339.551	199.295		404	121.901	45.135		404	93.975	89.849		404	71.811	151.272		404	185.29	70.278		404	48.317	348.22		404	207.454
405	120.128	124.771		405	233.608	90.905		405	276.606	50.612		405	255.771	109.655		405	348.417	79.454		405	301.872	70.176		405	339.551	200.792		405	121.901	47.095		405	93.975	83.406		405	71.811	154.309		405	185.29	65.864		405	48.317	333.395		405	207.454
406	120.128	120.745		406	233.608	90.634		406	276.606	52.139		406	255.771	111.558		406	348.417	76.771		406	301.872	70.142		406	339.551	204.742		406	121.901	46.218		406	93.975	92.453		406	71.811	153.167		406	185.29	66		406	48.317	324.633		406	207.454
407	120.128	116.266		407	233.608	91.194		407	276.606	51.306		407	255.771	112.797		407	348.417	76.91		407	301.872	68.978		407	339.551	200.913		407	121.901	45.382		407	93.975	88.684		407	71.811	152.235		407	185.29	67.443		407	48.317	332.89		407	207.454
408	120.128	125.155		408	233.608	93.08		408	276.606	52.8		408	255.771	112.341		408	348.417	77.115		408	301.872	68.765		408	339.551	202.039		408	121.901	47.847		408	93.975	83.429		408	71.811	155.753		408	185.29	67.943		408	48.317	344.716		408	207.454
409	120.128	118.934		409	233.608	89.239		409	276.606	55.812		409	255.771	113.218		409	348.417	75.316		409	301.872	68.424		409	339.551	201.867		409	121.901	44.476		409	93.975	93.863		409	71.811	157.093		409	185.29	64.019		409	48.317	321.156		409	207.454
410	120.128	118.627		410	233.608	88.203		410	276.606	53.973		410	255.771	113.633		410	348.417	77.814		410	301.872	67.642		410	339.551	204.356		410	121.901	45.145		410	93.975	92.038		410	71.811	158.815		410	185.29	65.148		410	48.317	340.44		410	207.454
411	120.128	116.605		411	233.608	89.97		411	276.606	52.907		411	255.771	112.497		411	348.417	76.454		411	301.872	68.987		411	339.551	205.121		411	121.901	44.807		411	93.975	91.354		411	71.811	154.617		411	185.29	63.799		411	48.317	335.725		411	207.454
412	120.128	115.531		412	233.608	87.438		412	276.606	51.753		412	255.771	113.834		412	348.417	76.154		412	301.872	67.662		412	339.551	203.218		412	121.901	46.382		412	93.975	91.217		412	71.811	144.938		412	185.29	63.519		412	48.317	337.55		412	207.454
413	120.128	119.292		413	233.608	85.949		413	276.606	53.694		413	255.771	114.101		413	348.417	78.579		413	301.872	69.492		413	339.551	201.287		413	121.901	45.622		413	93.975	89.302		413	71.811	162.642		413	185.29	66.325		413	48.317	322.083		413	207.454
414	120.128	116.328		414	233.608	86.528		414	276.606	51.886		414	255.771	114.383		414	348.417	77.107		414	301.872	70.228		414	339.551	206.745		414	121.901	45.036		414	93.975	91.604		414	71.811	154.444		414	185.29	66.409		414	48.317	330.376		414	207.454
415	120.128	112.649		415	233.608	85.038		415	276.606	54.155		415	255.771	110.692		415	348.417	79.088		415	301.872	68.734		415	339.551	207.834		415	121.901	46.633		415	93.975	91.278		415	71.811	160.556		415	185.29	63.627		415	48.317	336.872		415	207.454
416	120.128	114.066		416	233.608	87.48		416	276.606	53.476		416	255.771	111.638		416	348.417	76.286		416	301.872	67.762		416	339.551	207.042		416	121.901	44.585		416	93.975	86.024		416	71.811	156.142		416	185.29	66.103		416	48.317	334.211		416	207.454
417	120.128	110.059		417	233.608	87.393		417	276.606	54.904		417	255.771	111.49		417	348.417	78.517		417	301.872	70.906		417	339.551	205.798		417	121.901	45.942		417	93.975	83.986		417	71.811	155.321		417	185.29	66.694		417	48.317	334.982		417	207.454
418	120.128	112.17		418	233.608	86.397		418	276.606	54.308		418	255.771	109.265		418	348.417	77.351		418	301.872	69.978		418	339.551	204.521		418	121.901	46.4		418	93.975	88.575		418	71.811	164.037		418	185.29	68.124		418	48.317	347.927		418	207.454
419	120.128	111.897		419	233.608	81.767		419	276.606	54.25		419	255.771	111.321		419	348.417	76.793		419	301.872	68.772		419	339.551	206.245		419	121.901	43.196		419	93.975	85.401		419	71.811	166.951		419	185.29	69.742		419	48.317	345.174		419	207.454
420	120.128	110.491		420	233.608	83.66		420	276.606	53.304		420	255.771	109.896		420	348.417	78.482		420	301.872	66.621		420	339.551	206.769		420	121.901	46.793		420	93.975	86.057		420	71.811	159.457		420	185.29	71.378		420	48.317	331.028		420	207.454
421	120.128	114.554		421	233.608	85.981		421	276.606	52.466		421	255.771	107.795		421	348.417	75.771		421	301.872	70.769		421	339.551	201.57		421	121.901	44.342		421	93.975	86.311		421	71.811	160.827		421	185.29	64.981		421	48.317	336.844		421	207.454
422	120.128	106.561		422	233.608	85.816		422	276.606	53.756		422	255.771	112.624		422	348.417	78.038		422	301.872	71.435		422	339.551	204.932		422	121.901	44.895		422	93.975	87.198		422	71.811	153.136		422	185.29	65.081		422	48.317	326.523		422	207.454
423	120.128	110.506		423	233.608	83.96		423	276.606	50.157		423	255.771	107.841		423	348.417	76.827		423	301.872	70.734		423	339.551	207.389		423	121.901	45.044		423	93.975	80.189		423	71.811	158.21		423	185.29	69.132		423	48.317	339.789		423	207.454
424	120.128	106.915		424	233.608	86.598		424	276.606	50.71		424	255.771	112.685		424	348.417	76.677		424	301.872	71.931		424	339.551	205.405		424	121.901	46.924		424	93.975	80.363		424	71.811	159.074		424	185.29	69.447		424	48.317	319.505		424	207.454
425	120.128	108.62		425	233.608	83.262		425	276.606	52.087		425	255.771	113.371		425	348.417	76.218		425	301.872	70.372		425	339.551	204.292		425	121.901	47.513		425	93.975	79.868		425	71.811	156.71		425	185.29	64.457		425	48.317	321.963		425	207.454
426	120.128	108.472		426	233.608	78.74		426	276.606	53.812		426	255.771	109.177		426	348.417	76.793		426	301.872	67.768		426	339.551	205.731		426	121.901	45.629		426	93.975	86.915		426	71.811	155.512		426	185.29	69.316		426	48.317	322.899		426	207.454
427	120.128	105.945		427	233.608	80.985		427	276.606	52.957		427	255.771	111.355		427	348.417	76.581		427	301.872	68.504		427	339.551	208.54		427	121.901	44.491		427	93.975	81.84		427	71.811	154.525		427	185.29	66.321		427	48.317	327.523		427	207.454
428	120.128	109.1		428	233.608	82.503		428	276.606	51.325		428	255.771	110.688		428	348.417	75.21		428	301.872	68.94		428	339.551	207.742		428	121.901	46.884		428	93.975	85.608		428	71.811	160.698		428	185.29	65.368		428	48.317	329.688		428	207.454
429	120.128	108.771		429	233.608	79.62		429	276.606	51.662		429	255.771	110.005		429	348.417	75.817		429	301.872	69.107		429	339.551	210.202		429	121.901	45.596		429	93.975	82.731		429	71.811	152.636		429	185.29	63.801		429	48.317	326.817		429	207.454
430	120.128	108.28		430	233.608	82.953		430	276.606	53.321		430	255.771	110.681		430	348.417	77.538		430	301.872	69.604		430	339.551	205.427		430	121.901	43.022		430	93.975	83.363		430	71.811	161.284		430	185.29	61.505		430	48.317	330.624		430	207.454
431	120.128	118.985		431	233.608	80.875		431	276.606	52.865		431	255.771	112.194		431	348.417	76.944		431	301.872	70.686		431	339.551	200.466		431	121.901	45.516		431	93.975	79.84		431	71.811	159.37		431	185.29	65.206		431	48.317	337.972		431	207.454
432	120.128	113.731		432	233.608	78.958		432	276.606	52.801		432	255.771	109.038		432	348.417	77.146		432	301.872	70.059		432	339.551	205.269		432	121.901	42.775		432	93.975	86.481		432	71.811	156.315		432	185.29	62.017		432	48.317	318.477		432	207.454
433	120.128	120.192		433	233.608	82.459		433	276.606	48.774		433	255.771	110.166		433	348.417	78.52		433	301.872	68.47		433	339.551	209.983		433	121.901	44.549		433	93.975	81.83		433	71.811	147.309		433	185.29	61.081		433	48.317	336.807		433	207.454
434	120.128	112.978		434	233.608	81.529		434	276.606	51.479		434	255.771	111.459		434	348.417	78.751		434	301.872	69.505		434	339.551	208.2		434	121.901	44.084		434	93.975	89.344		434	71.811	156.222		434	185.29	61.397		434	48.317	333.505		434	207.454
435	120.128	111.982		435	233.608	78.017		435	276.606	51.772		435	255.771	108.132		435	348.417	75.879		435	301.872	69.446		435	339.551	212.836		435	121.901	47.047		435	93.975	84.075		435	71.811	156.037		435	185.29	62.414		435	48.317	335.431		435	207.454
436	120.128	108.93		436	233.608	78.471		436	276.606	51.053		436	255.771	108.062		436	348.417	77.567		436	301.872	68.705		436	339.551	209.243		436	121.901	43.207		436	93.975	88.005		436	71.811	155.123		436	185.29	60.833		436	48.317	323.183		436	207.454
437	120.128	100.177		437	233.608	77.231		437	276.606	50.014		437	255.771	109.028		437	348.417	77.754		437	301.872	69.044		437	339.551	211.627		437	121.901	44.193		437	93.975	82.712		437	71.811	155.414		437	185.29	60.95		437	48.317	321.495		437	207.454
438	120.128	105.576		438	233.608	81.218		438	276.606	50.582		438	255.771	107.64		438	348.417	79.375		438	301.872	68.794		438	339.551	209.219		438	121.901	48.204		438	93.975	84.047		438	71.811	153.13		438	185.29	60.746		438	48.317	331.505		438	207.454
439	120.128	110.664		439	233.608	85.08		439	276.606	48.681		439	255.771	104.579		439	348.417	78.156		439	301.872	67.996		439	339.551	206.869		439	121.901	47.902		439	93.975	83.656		439	71.811	147.698		439	185.29	63.99		439	48.317	343.725		439	207.454
440	120.128	110.328		440	233.608	80.442		440	276.606	50.84		440	255.771	107.752		440	348.417	76.214		440	301.872	67.812		440	339.551	208.569		440	121.901	47.018		440	93.975	81.967		440	71.811	154.123		440	185.29	58.909		440	48.317	327.431		440	207.454
441	120.128	109.849		441	233.608	84.639		441	276.606	50.178		441	255.771	106.799		441	348.417	78.76		441	301.872	68.122		441	339.551	205.845		441	121.901	47.018		441	93.975	89.863		441	71.811	152.062		441	185.29	59.531		441	48.317	317.486		441	207.454
442	120.128	118.339		442	233.608	81.696		442	276.606	49.381		442	255.771	106.428		442	348.417	76.5		442	301.872	69.051		442	339.551	207.93		442	121.901	44.113		442	93.975	85.792		442	71.811	155.346		442	185.29	61.823		442	48.317	328.294		442	207.454
443	120.128	121.472		443	233.608	84.905		443	276.606	52.218		443	255.771	106.893		443	348.417	75.198		443	301.872	69.206		443	339.551	204.67		443	121.901	46.4		443	93.975	87.453		443	71.811	153.327		443	185.29	58.801		443	48.317	324.073		443	207.454
444	120.128	113.712		444	233.608	83.769		444	276.606	51.502		444	255.771	110.435		444	348.417	78.188		444	301.872	69.552		444	339.551	206.556		444	121.901	46.091		444	93.975	90.245		444	71.811	156.37		444	185.29	58.615		444	48.317	319.174		444	207.454
445	120.128	118.48		445	233.608	84.07		445	276.606	52.438		445	255.771	107.324		445	348.417	76.36		445	301.872	68.157		445	339.551	208.454		445	121.901	48.585		445	93.975	92.703		445	71.811	156.735		445	185.29	58.617		445	48.317	312.294		445	207.454
446	120.128	116.956		446	233.608	84.372		446	276.606	52.127		446	255.771	110.412		446	348.417	79.285		446	301.872	68.95		446	339.551	206.065		446	121.901	48.673		446	93.975	82.519		446	71.811	154.994		446	185.29	59.392		446	48.317	322.009		446	207.454
447	120.128	117.461		447	233.608	84.332		447	276.606	51.889		447	255.771	108.019		447	348.417	78.793		447	301.872	68.838		447	339.551	205.082		447	121.901	48.738		447	93.975	89.09		447	71.811	155.5		447	185.29	64.304		447	48.317	328.835		447	207.454
448	120.128	114.594		448	233.608	86.858		448	276.606	50.566		448	255.771	108.906		448	348.417	77.202		448	301.872	66.777		448	339.551	204.758		448	121.901	46.225		448	93.975	83.5		448	71.811	156.586		448	185.29	59.383		448	48.317	313.605		448	207.454
449	120.128	111.432		449	233.608	84.38		449	276.606	50.918		449	255.771	108.749		449	348.417	79.333		449	301.872	72.53		449	339.551	207.879		449	121.901	47.64		449	93.975	91.179		449	71.811	149.617		449	185.29	62.038		449	48.317	330.706		449	207.454
450	120.128	118.768		450	233.608	81.002		450	276.606	51.457		450	255.771	106.577		450	348.417	78.168		450	301.872	69.935		450	339.551	205.278		450	121.901	51.131		450	93.975	88.472		450	71.811	149.346		450	185.29	62.675		450	48.317	319.807		450	207.454
451	120.128	119.421		451	233.608	81.956		451	276.606	52.399		451	255.771	112.4		451	348.417	77.515		451	301.872	66.377		451	339.551	208.171		451	121.901	48.036		451	93.975	89.038		451	71.811	156.833		451	185.29	60.667		451	48.317	327.55		451	207.454
452	120.128	115.554		452	233.608	83.455		452	276.606	54.176		452	255.771	108.312		452	348.417	75.44		452	301.872	66.624		452	339.551	214.11		452	121.901	47.771		452	93.975	85.566		452	71.811	155.272		452	185.29	59.732		452	48.317	321.505		452	207.454
453	120.128	117.277		453	233.608	82.662		453	276.606	49.825		453	255.771	107.468		453	348.417	75.346		453	301.872	70.802		453	339.551	211.349		453	121.901	47.949		453	93.975	87.816		453	71.811	153.364		453	185.29	61.177		453	48.317	317.303		453	207.454
454	120.128	121.343		454	233.608	84.025		454	276.606	52.426		454	255.771	107.213		454	348.417	76.621		454	301.872	68.733		454	339.551	204.765		454	121.901	46.364		454	93.975	86.5		454	71.811	151.272		454	185.29	63.187		454	48.317	315.89		454	207.454
455	120.128	118.258		455	233.608	79.264		455	276.606	51.782		455	255.771	106.449		455	348.417	76.553		455	301.872	67.302		455	339.551	208.829		455	121.901	47.444		455	93.975	80.575		455	71.811	153.173		455	185.29	60.373		455	48.317	316.202		455	207.454
456	120.128	120.1		456	233.608	81.666		456	276.606	53.207		456	255.771	109.442		456	348.417	76.589		456	301.872	67.888		456	339.551	209.436		456	121.901	45.913		456	93.975	82.5		456	71.811	153.074		456	185.29	61.098		456	48.317	308.752		456	207.454
457	120.128	124.417		457	233.608	79.393		457	276.606	52.399		457	255.771	111.033		457	348.417	78.711		457	301.872	68.549		457	339.551	211.362		457	121.901	46.127		457	93.975	84.948		457	71.811	153.568		457	185.29	63.208		457	48.317	324.009		457	207.454
458	120.128	125.273		458	233.608	80.476		458	276.606	50.474		458	255.771	107.506		458	348.417	76.56		458	301.872	69.565		458	339.551	208.437		458	121.901	45.196		458	93.975	84.613		458	71.811	158.846		458	185.29	62.67		458	48.317	334.743		458	207.454
459	120.128	126.705		459	233.608	79.345		459	276.606	49.079		459	255.771	108.879		459	348.417	76.382		459	301.872	66.843		459	339.551	211.188		459	121.901	47.44		459	93.975	83.882		459	71.811	148.79		459	185.29	62.23		459	48.317	316.569		459	207.454
460	120.128	116.041		460	233.608	80.698		460	276.606	49.268		460	255.771	110.702		460	348.417	76.899		460	301.872	68.88		460	339.551	200.516		460	121.901	49.611		460	93.975	82.358		460	71.811	145.407		460	185.29	61.737		460	48.317	319.826		460	207.454
461	120.128	115.321		461	233.608	82.156		461	276.606	51.228		461	255.771	103.562		461	348.417	77.324		461	301.872	70.69		461	339.551	183.218		461	121.901	48.829		461	93.975	86.278		461	71.811	145.086		461	185.29	60.754		461	48.317	324.459		461	207.454
462	120.128	120.221		462	233.608	79.376		462	276.606	49.207		462	255.771	107.818		462	348.417	75.686		462	301.872	70.044		462	339.551	165.319		462	121.901	46.113		462	93.975	86.354		462	71.811	151.549		462	185.29	60.512		462	48.317	329.422		462	207.454
463	120.128	116.705		463	233.608	80.357		463	276.606	49.716		463	255.771	107.539		463	348.417	75.562		463	301.872	68.518		463	339.551	161.576		463	121.901	47.149		463	93.975	79.066		463	71.811	153.389		463	185.29	60.656		463	48.317	323.615		463	207.454
464	120.128	121.915		464	233.608	77.457		464	276.606	50.056		464	255.771	106.473		464	348.417	74.419		464	301.872	66.628		464	339.551	169.022		464	121.901	46.844		464	93.975	85.533		464	71.811	151.321		464	185.29	59.163		464	48.317	319.45		464	207.454
465	120.128	115.812		465	233.608	75.009		465	276.606	49.923		465	255.771	110.043		465	348.417	73.457		465	301.872	66.536		465	339.551	204.453		465	121.901	49.135		465	93.975	88.358		465	71.811	159.012		465	185.29	60.309		465	48.317	306.642		465	207.454
466	120.128	121.402		466	233.608	74.734		466	276.606	50.423		466	255.771	105.726		466	348.417	77.608		466	301.872	69.568		466	339.551	212.098		466	121.901	47.724		466	93.975	86.651		466	71.811	156.272		466	185.29	59.785		466	48.317	308.679		466	207.454
467	120.128	129.904		467	233.608	72.915		467	276.606	50.829		467	255.771	107.539		467	348.417	76.65		467	301.872	70.179		467	339.551	214.033		467	121.901	49.229		467	93.975	82.929		467	71.811	152.37		467	185.29	61.022		467	48.317	306.018		467	207.454
468	120.128	121.247		468	233.608	72.662		468	276.606	49.431		468	255.771	107.147		468	348.417	75.076		468	301.872	67.499		468	339.551	202.668		468	121.901	46.025		468	93.975	81.934		468	71.811	153.438		468	185.29	60.596		468	48.317	314.605		468	207.454
469	120.128	120.793		469	233.608	73.82		469	276.606	51.774		469	255.771	106.948		469	348.417	76.108		469	301.872	68.555		469	339.551	187.949		469	121.901	49.215		469	93.975	84.415		469	71.811	151.204		469	185.29	58.974		469	48.317	317.055		469	207.454
470	120.128	124.262		470	233.608	77.679		470	276.606	50.325		470	255.771	107.364		470	348.417	74.719		470	301.872	66.918		470	339.551	182.473		470	121.901	45.898		470	93.975	83.844		470	71.811	150.593		470	185.29	60.349		470	48.317	334.193		470	207.454
471	120.128	121.863		471	233.608	80.67		471	276.606	51.609		471	255.771	108.314		471	348.417	73.888		471	301.872	67.881		471	339.551	172.813		471	121.901	48.407		471	93.975	80.255		471	71.811	148.815		471	185.29	61.144		471	48.317	331.789		471	207.454
472	120.128	124.325		472	233.608	78.218		472	276.606	48.934		472	255.771	107.076		472	348.417	75.763		472	301.872	69.31		472	339.551	171.654		472	121.901	51.8		472	93.975	85.448		472	71.811	155.29		472	185.29	60.904		472	48.317	313.138		472	207.454
473	120.128	121.572		473	233.608	79.983		473	276.606	49.123		473	255.771	106.835		473	348.417	77.642		473	301.872	68.93		473	339.551	167.842		473	121.901	48.775		473	93.975	80.203		473	71.811	154.352		473	185.29	60.658		473	48.317	321.009		473	207.454
474	120.128	118.417		474	233.608	80.727		474	276.606	49.173		474	255.771	107.698		474	348.417	77.004		474	301.872	67.887		474	339.551	165.768		474	121.901	46.436		474	93.975	88.283		474	71.811	150.988		474	185.29	61.227		474	48.317	324.33		474	207.454
475	120.128	113.506		475	233.608	80.398		475	276.606	50.127		475	255.771	106.714		475	348.417	76.887		475	301.872	68.206		475	339.551	163.642		475	121.901	48.607		475	93.975	78.958		475	71.811	155.049		475	185.29	58.995		475	48.317	339.055		475	207.454
476	120.128	116.742		476	233.608	81.75		476	276.606	52.934		476	255.771	108.418		476	348.417	76.985		476	301.872	69.671		476	339.551	166.01		476	121.901	50.113		476	93.975	79.401		476	71.811	153.253		476	185.29	59.536		476	48.317	322.083		476	207.454
477	120.128	118.793		477	233.608	81.025		477	276.606	52.402		477	255.771	109.444		477	348.417	74.719		477	301.872	68.297		477	339.551	164.636		477	121.901	47.138		477	93.975	85.255		477	71.811	153.142		477	185.29	58.998		477	48.317	330.789		477	207.454
478	120.128	124.387		478	233.608	80.467		478	276.606	50.933		478	255.771	113.471		478	348.417	77.58		478	301.872	67.559		478	339.551	158.889		478	121.901	50.389		478	93.975	84.217		478	71.811	163.698		478	185.29	55.443		478	48.317	314.275		478	207.454
479	120.128	125.465		479	233.608	82.702		479	276.606	49.473		479	255.771	108.825		479	348.417	75.952		479	301.872	67.667		479	339.551	156.617		479	121.901	52.858		479	93.975	81.259		479	71.811	149.377		479	185.29	58.916		479	48.317	309.211		479	207.454
480	120.128	126.771		480	233.608	84.385		480	276.606	50.609		480	255.771	110.634		480	348.417	77.858		480	301.872	66.554		480	339.551	148.312		480	121.901	49.487		480	93.975	85.5		480	71.811	149.698		480	185.29	58.089		480	48.317	315.945		480	207.454
481	120.128	114.037		481	233.608	82.135		481	276.606	51.393		481	255.771	112.435		481	348.417	75.754		481	301.872	67.924		481	339.551	140.007		481	121.901	51.935		481	93.975	84.019		481	71.811	162.426		481	185.29	57.947		481	48.317	310.138		481	207.454
482	120.128	114.487		482	233.608	85.203		482	276.606	50.46		482	255.771	111.295		482	348.417	76.345		482	301.872	68.671		482	339.551	138.275		482	121.901	49.945		482	93.975	81.623		482	71.811	155.29		482	185.29	59.306		482	48.317	312.853		482	207.454
483	120.128	109.255		483	233.608	88.239		483	276.606	52.705		483	255.771	109.258		483	348.417	76.028		483	301.872	67.164		483	339.551	142.347		483	121.901	53.473		483	93.975	85.986		483	71.811	152.889		483	185.29	57.524		483	48.317	313.468		483	207.454
484	120.128	104.576		484	233.608	86.698		484	276.606	51.256		484	255.771	108.749		484	348.417	75.524		484	301.872	67.554		484	339.551	139.902		484	121.901	50.196		484	93.975	82.108		484	71.811	157.327		484	185.29	58.766		484	48.317	322.826		484	207.454
485	120.128	110.989		485	233.608	86.444		485	276.606	50.378		485	255.771	108.697		485	348.417	75.216		485	301.872	66.46		485	339.551	132.211		485	121.901	49.305		485	93.975	80.599		485	71.811	155.043		485	185.29	60.488		485	48.317	315.872		485	207.454
486	120.128	113.93		486	233.608	85.514		486	276.606	50.526		486	255.771	111.049		486	348.417	75.879		486	301.872	66.182		486	339.551	131.915		486	121.901	48.913		486	93.975	87.599		486	71.811	156.469		486	185.29	61.179		486	48.317	330.064		486	207.454
487	120.128	116.339		487	233.608	87.565		487	276.606	48.888		487	255.771	109.603		487	348.417	75.87		487	301.872	68.592		487	339.551	136.969		487	121.901	50.902		487	93.975	87.533		487	71.811	152.617		487	185.29	58.426		487	48.317	323.239		487	207.454
488	120.128	116.229		488	233.608	85.452		488	276.606	50.95		488	255.771	113.586		488	348.417	75.508		488	301.872	65.561		488	339.551	133.215		488	121.901	50.095		488	93.975	89.75		488	71.811	151.796		488	185.29	58.447		488	48.317	311.954		488	207.454
489	120.128	113.734		489	233.608	85.991		489	276.606	50.228		489	255.771	113.759		489	348.417	75.137		489	301.872	69.192		489	339.551	136.281		489	121.901	51.745		489	93.975	88.868		489	71.811	146.525		489	185.29	60.301		489	48.317	311.725		489	207.454
490	120.128	124.037		490	233.608	85.326		490	276.606	48.111		490	255.771	109.726		490	348.417	77.513		490	301.872	67.11		490	339.551	138.025		490	121.901	48.825		490	93.975	83.038		490	71.811	149.475		490	185.29	60.234		490	48.317	333.899		490	207.454
491	120.128	121.801		491	233.608	83.512		491	276.606	49.987		491	255.771	110.397		491	348.417	77.738		491	301.872	68.799		491	339.551	134.131		491	121.901	50.687		491	93.975	87.637		491	71.811	155.457		491	185.29	60.014		491	48.317	317.349		491	207.454
492	120.128	126.055		492	233.608	82.116		492	276.606	47.705		492	255.771	113.648		492	348.417	77.822		492	301.872	66.812		492	339.551	133.774		492	121.901	50.207		492	93.975	89.354		492	71.811	158.648		492	185.29	59.706		492	48.317	315.716		492	207.454
493	120.128	121.749		493	233.608	81.628		493	276.606	47.704		493	255.771	109.133		493	348.417	78.333		493	301.872	65.201		493	339.551	133.424		493	121.901	52.084		493	93.975	85.038		493	71.811	151.173		493	185.29	57.175		493	48.317	328.89		493	207.454
494	120.128	121.402		494	233.608	83.351		494	276.606	47.869		494	255.771	110.224		494	348.417	78.435		494	301.872	64.765		494	339.551	129.256		494	121.901	49.673		494	93.975	85.906		494	71.811	148.611		494	185.29	58.66		494	48.317	322.495		494	207.454
495	120.128	120.314		495	233.608	81.742		495	276.606	49.197		495	255.771	110.482		495	348.417	77.271		495	301.872	68.812		495	339.551	127.531		495	121.901	50.269		495	93.975	88.882		495	71.811	157.475		495	185.29	56.701		495	48.317	325.817		495	207.454
496	120.128	120.904		496	233.608	80.617		496	276.606	50.229		496	255.771	112.775		496	348.417	76.791		496	301.872	66.742		496	339.551	124.657		496	121.901	50.127		496	93.975	88.325		496	71.811	148.636		496	185.29	59.763		496	48.317	331.404		496	207.454
497	120.128	118.613		497	233.608	81.546		497	276.606	50.359		497	255.771	111.704		497	348.417	77.743		497	301.872	64.618		497	339.551	120.898		497	121.901	47.924		497	93.975	86.741		497	71.811	152.29		497	185.29	58.722		497	48.317	291.89		497	207.454
498	120.128	118.93		498	233.608	82.924		498	276.606	49.042		498	255.771	109.678		498	348.417	75.873		498	301.872	66.905		498	339.551	119.332		498	121.901	48.116		498	93.975	92.981		498	71.811	153.309		498	185.29	56.962		498	48.317	322.477		498	207.454
499	120.128	114.188		499	233.608	83.273		499	276.606	48.558		499	255.771	113.548		499	348.417	75.824		499	301.872	66.787		499	339.551	118.403		499	121.901	46.749		499	93.975	89.392		499	71.811	155.642		499	185.29	56.847		499	48.317	325.33		499	207.454
500	120.128	115.173		500	233.608	81.943		500	276.606	48.824		500	255.771	108.633		500	348.417	75.008		500	301.872	64.852		500	339.551	119.172		500	121.901	50.036		500	93.975	83.75		500	71.811	151.926		500	185.29	56.921		500	48.317	313.046		500	207.454
501	120.128	117.343		501	233.608	81.603		501	276.606	48.998		501	255.771	110.062		501	348.417	76.632		501	301.872	65.894		501	339.551	116.811		501	121.901	48.989		501	93.975	87.165		501	71.811	149.895		501	185.29	59.51		501	48.317	319.615		501	207.454
502	120.128	126.033		502	233.608	81.992		502	276.606	48.774		502	255.771	110.754		502	348.417	78.486		502	301.872	64.853		502	339.551	115.24		502	121.901	47.56		502	93.975	89.415		502	71.811	158.938		502	185.29	57.746		502	48.317	316.119		502	207.454
503	120.128	129.863		503	233.608	83.15		503	276.606	49.407		503	255.771	108.64		503	348.417	79.251		503	301.872	63.858		503	339.551	113.23		503	121.901	49.182		503	93.975	85.882		503	71.811	152.549		503	185.29	58.385		503	48.317	330.862		503	207.454
504	120.128	130.148		504	233.608	82.844		504	276.606	49.633		504	255.771	108.114		504	348.417	76.244		504	301.872	65.552		504	339.551	118.042		504	121.901	47.316		504	93.975	86.958		504	71.811	152.759		504	185.29	59.144		504	48.317	314.101		504	207.454
505	120.128	129.406		505	233.608	81.774		505	276.606	49.338		505	255.771	110.059		505	348.417	75.382		505	301.872	64.816		505	339.551	120.273		505	121.901	47.935		505	93.975	81.877		505	71.811	155.185		505	185.29	58.45		505	48.317	309.229		505	207.454
506	120.128	127.007		506	233.608	82.759		506	276.606	49.958		506	255.771	109.893		506	348.417	77.692		506	301.872	69.283		506	339.551	119.342		506	121.901	48.887		506	93.975	84.406		506	71.811	151.068		506	185.29	60.986		506	48.317	324		506	207.454
507	120.128	122.24		507	233.608	84.721		507	276.606	48.883		507	255.771	107.548		507	348.417	81.014		507	301.872	64.302		507	339.551	118.606		507	121.901	49.647		507	93.975	84.575		507	71.811	151.84		507	185.29	58.959		507	48.317	309.431		507	207.454
508	120.128	129.542		508	233.608	82.753		508	276.606	49.2		508	255.771	107.766		508	348.417	78.781		508	301.872	64.013		508	339.551	117.334		508	121.901	47.935		508	93.975	84.774		508	71.811	146.679		508	185.29	59.978		508	48.317	300.101		508	207.454
509	120.128	127.609		509	233.608	85.554		509	276.606	47.184		509	255.771	107.738		509	348.417	78.149		509	301.872	65.182		509	339.551	118.599		509	121.901	47.625		509	93.975	83.788		509	71.811	156.512		509	185.29	57.672		509	48.317	302.22		509	207.454
510	120.128	129.114		510	233.608	84.376		510	276.606	47.032		510	255.771	106.905		510	348.417	79.726		510	301.872	65.737		510	339.551	120.82		510	121.901	47.836		510	93.975	82.557		510	71.811	153.648		510	185.29	60.701		510	48.317	303.725		510	207.454
511	120.128	123.524		511	233.608	87.577		511	276.606	47.952		511	255.771	109.179		511	348.417	78.711		511	301.872	67.797		511	339.551	122.496		511	121.901	47.905		511	93.975	83.759		511	71.811	144.049		511	185.29	60.679		511	48.317	313.55		511	207.454
512	120.128	125.668		512	233.608	84.543		512	276.606	46.032		512	255.771	104.288		512	348.417	79.659		512	301.872	65.64		512	339.551	124.223		512	121.901	48.793		512	93.975	83.047		512	71.811	145.21		512	185.29	58.95		512	48.317	316.706		512	207.454
513	120.128	123.716		513	233.608	84.909		513	276.606	46.234		513	255.771	107.435		513	348.417	79.126		513	301.872	64.568		513	339.551	122.413		513	121.901	47.949		513	93.975	87.236		513	71.811	146.253		513	185.29	59.426		513	48.317	318.239		513	207.454
514	120.128	126.882		514	233.608	84.679		514	276.606	46.814		514	255.771	106.012		514	348.417	77.79		514	301.872	64.953		514	339.551	121.719		514	121.901	48.244		514	93.975	89.448		514	71.811	147.228		514	185.29	61.507		514	48.317	317.853		514	207.454
515	120.128	121.908		515	233.608	87.273		515	276.606	46.905		515	255.771	106.558		515	348.417	81.06		515	301.872	65.119		515	339.551	117.484		515	121.901	48.244		515	93.975	85.236		515	71.811	149.494		515	185.29	62.541		515	48.317	321.037		515	207.454
516	120.128	122.299		516	233.608	82.782		516	276.606	47.155		516	255.771	106.243		516	348.417	79.602		516	301.872	64.552		516	339.551	119.927		516	121.901	45.04		516	93.975	80.594		516	71.811	148.191		516	185.29	62.505		516	48.317	308.899		516	207.454
517	120.128	130.007		517	233.608	85.425		517	276.606	48.596		517	255.771	107.205		517	348.417	81.51		517	301.872	64.225		517	339.551	121.537		517	121.901	46.215		517	93.975	85.58		517	71.811	146.42		517	185.29	63.22		517	48.317	302.138		517	207.454
518	120.128	131.192		518	233.608	83.546		518	276.606	49.316		518	255.771	104.019		518	348.417	81.581		518	301.872	66.722		518	339.551	120.18		518	121.901	46.367		518	93.975	81.283		518	71.811	150.08		518	185.29	65.234		518	48.317	297.826		518	207.454
519	120.128	134.063		519	233.608	82.393		519	276.606	48.926		519	255.771	105.419		519	348.417	79.681		519	301.872	64.856		519	339.551	123.711		519	121.901	45.044		519	93.975	79.057		519	71.811	151.586		519	185.29	65.665		519	48.317	313.037		519	207.454
520	120.128	131.21		520	233.608	81.002		520	276.606	50.421		520	255.771	104.939		520	348.417	81.384		520	301.872	65.91		520	339.551	122.785		520	121.901	46.393		520	93.975	84.099		520	71.811	146.42		520	185.29	65.603		520	48.317	303.679		520	207.454
521	120.128	129.893		521	233.608	82.989		521	276.606	50.043		521	255.771	108.444		521	348.417	82.804		521	301.872	65.129		521	339.551	128.157		521	121.901	46.033		521	93.975	76.858		521	71.811	152.228		521	185.29	66.663		521	48.317	301.312		521	207.454
522	120.128	135		522	233.608	80.034		522	276.606	48.901		522	255.771	106.099		522	348.417	79.463		522	301.872	67.463		522	339.551	133.504		522	121.901	44.545		522	93.975	87.382		522	71.811	143.537		522	185.29	64.854		522	48.317	309.917		522	207.454
523	120.128	134.664		523	233.608	78.586		523	276.606	48.713		523	255.771	104.196		523	348.417	82.034		523	301.872	66.238		523	339.551	156.937		523	121.901	44.215		523	93.975	89.042		523	71.811	153.333		523	185.29	66.73		523	48.317	305.321		523	207.454
524	120.128	138.203		524	233.608	80.03		524	276.606	48.936		524	255.771	105.574		524	348.417	80.108		524	301.872	66.461		524	339.551	162.819		524	121.901	44.767		524	93.975	83.844		524	71.811	157.728		524	185.29	67.512		524	48.317	311.917		524	207.454
525	120.128	132.262		525	233.608	77.991		525	276.606	46.652		525	255.771	105.158		525	348.417	79.758		525	301.872	66.276		525	339.551	159.988		525	121.901	43.185		525	93.975	82.269		525	71.811	146.481		525	185.29	66.868		525	48.317	310.661		525	207.454
526	120.128	124.118		526	233.608	80.063		526	276.606	49.144		526	255.771	109.303		526	348.417	79.436		526	301.872	64.059		526	339.551	169.48		526	121.901	44.975		526	93.975	79.363		526	71.811	160.395		526	185.29	68.263		526	48.317	309.927		526	207.454
527	120.128	122.594		527	233.608	82.099		527	276.606	49.667		527	255.771	108.946		527	348.417	78.398		527	301.872	65.095		527	339.551	169.068		527	121.901	43.967		527	93.975	84.113		527	71.811	151.272		527	185.29	66.06		527	48.317	305.844		527	207.454
528	120.128	119.351		528	233.608	81.63		528	276.606	47.601		528	255.771	108.747		528	348.417	80.887		528	301.872	65.156		528	339.551	171.034		528	121.901	46		528	93.975	79.627		528	71.811	146.71		528	185.29	69.593		528	48.317	300.927		528	207.454
529	120.128	113.915		529	233.608	84.051		529	276.606	49.635		529	255.771	105.979		529	348.417	80.162		529	301.872	64.382		529	339.551	177.424		529	121.901	46.295		529	93.975	83.778		529	71.811	147.5		529	185.29	69.926		529	48.317	288.862		529	207.454
530	120.128	112.845		530	233.608	79.076		530	276.606	49.402		530	255.771	105.593		530	348.417	80.009		530	301.872	66.263		530	339.551	178.253		530	121.901	48.225		530	93.975	87.288		530	71.811	146.654		530	185.29	68.495		530	48.317	302.073		530	207.454
531	120.128	114.996		531	233.608	80.345		531	276.606	47.585		531	255.771	109.381		531	348.417	80.361		531	301.872	66.816		531	339.551	181.589		531	121.901	45.582		531	93.975	88.651		531	71.811	145.802		531	185.29	69.555		531	48.317	314.706		531	207.454
532	120.128	115.373		532	233.608	81.622		532	276.606	49.864		532	255.771	110.56		532	348.417	79.625		532	301.872	64.137		532	339.551	183.919		532	121.901	46.287		532	93.975	86.585		532	71.811	152.444		532	185.29	67.823		532	48.317	295.009		532	207.454
533	120.128	116.974		533	233.608	77.271		533	276.606	48.008		533	255.771	109.397		533	348.417	82.66		533	301.872	66.994		533	339.551	188.911		533	121.901	45.225		533	93.975	88.637		533	71.811	154.074		533	185.29	68.531		533	48.317	300.578		533	207.454
534	120.128	113.76		534	233.608	76.609		534	276.606	48.489		534	255.771	109.47		534	348.417	78.656		534	301.872	66.1		534	339.551	189.061		534	121.901	44.44		534	93.975	90.693		534	71.811	144.784		534	185.29	68.447		534	48.317	291.578		534	207.454
535	120.128	113.539		535	233.608	76.182		535	276.606	49.434		535	255.771	112.991		535	348.417	81.145		535	301.872	63.593		535	339.551	191.662		535	121.901	45.495		535	93.975	88.241		535	71.811	145.84		535	185.29	68.648		535	48.317	309.991		535	207.454
536	120.128	114.576		536	233.608	71.541		536	276.606	50.365		536	255.771	107.456		536	348.417	80.994		536	301.872	67.12		536	339.551	189.151		536	121.901	47.255		536	93.975	87.288		536	71.811	149.284		536	185.29	67.213		536	48.317	305.064		536	207.454
537	120.128	113.118		537	233.608	72.801		537	276.606	47.498		537	255.771	110.712		537	348.417	79.767		537	301.872	65.846		537	339.551	188.803		537	121.901	47.418		537	93.975	86.533		537	71.811	151.623		537	185.29	70.201		537	48.317	311.367		537	207.454
538	120.128	111.808		538	233.608	73.583		538	276.606	49.875		538	255.771	108.721		538	348.417	79.078		538	301.872	62.222		538	339.551	187.189		538	121.901	45.233		538	93.975	88.208		538	71.811	155.191		538	185.29	68.656		538	48.317	301.349		538	207.454
539	120.128	113.749		539	233.608	72.776		539	276.606	48.17		539	255.771	109.669		539	348.417	80.846		539	301.872	65.364		539	339.551	188.543		539	121.901	50.262		539	93.975	83.354		539	71.811	152.068		539	185.29	65.213		539	48.317	302.055		539	207.454
540	120.128	111.092		540	233.608	73.628		540	276.606	47.285		540	255.771	111.054		540	348.417	81.492		540	301.872	65.264		540	339.551	192.704		540	121.901	45.513		540	93.975	92.495		540	71.811	150.068		540	185.29	66.172		540	48.317	299.404		540	207.454
541	120.128	108.55		541	233.608	73.677		541	276.606	49.188		541	255.771	108.962		541	348.417	81.601		541	301.872	64.858		541	339.551	188.423		541	121.901	44.491		541	93.975	93.41		541	71.811	144.772		541	185.29	63.246		541	48.317	296.972		541	207.454
542	120.128	112.531		542	233.608	74.021		542	276.606	47.795		542	255.771	110.591		542	348.417	79.299		542	301.872	64.53		542	339.551	185.239		542	121.901	47.156		542	93.975	87.708		542	71.811	145.704		542	185.29	65.208		542	48.317	299.294		542	207.454
543	120.128	110.458		543	233.608	73.006		543	276.606	48.365		543	255.771	109.461		543	348.417	78.957		543	301.872	65.336		543	339.551	187.926		543	121.901	43.371		543	93.975	85.623		543	71.811	150.975		543	185.29	62.189		543	48.317	295.67		543	207.454
544	120.128	104.745		544	233.608	71.376		544	276.606	48.046		544	255.771	109.593		544	348.417	79.73		544	301.872	64.228		544	339.551	188.317		544	121.901	43.916		544	93.975	89.019		544	71.811	146.889		544	185.29	66.373		544	48.317	288.908		544	207.454
545	120.128	113.897		545	233.608	71.4		545	276.606	47.103		545	255.771	110.664		545	348.417	79.314		545	301.872	65.148		545	339.551	180.852		545	121.901	46.538		545	93.975	90.684		545	71.811	150.333		545	185.29	62.947		545	48.317	306.596		545	207.454
546	120.128	107.535		546	233.608	71.789		546	276.606	48.731		546	255.771	107.251		546	348.417	78.421		546	301.872	66.962		546	339.551	178.838		546	121.901	47.92		546	93.975	86.061		546	71.811	154.025		546	185.29	63.844		546	48.317	304.229		546	207.454
547	120.128	116.985		547	233.608	71.831		547	276.606	48.739		547	255.771	109.522		547	348.417	80.103		547	301.872	65.605		547	339.551	184.884		547	121.901	45.52		547	93.975	87.698		547	71.811	142.753		547	185.29	65.904		547	48.317	297.927		547	207.454
548	120.128	111.576		548	233.608	68.639		548	276.606	47.676		548	255.771	108.019		548	348.417	80.289		548	301.872	65.734		548	339.551	184.068		548	121.901	48.185		548	93.975	83.986		548	71.811	149.191		548	185.29	67.531		548	48.317	294.22		548	207.454
549	120.128	109.996		549	233.608	69.985		549	276.606	49.495		549	255.771	106.425		549	348.417	78.45		549	301.872	64.913		549	339.551	186.905		549	121.901	46.971		549	93.975	92.542		549	71.811	158.463		549	185.29	67.945		549	48.317	299.541		549	207.454
550	120.128	109.557		550	233.608	68.157		550	276.606	46.859		550	255.771	105.042		550	348.417	80.588		550	301.872	66.151		550	339.551	186.662		550	121.901	45.982		550	93.975	87.976		550	71.811	151.21		550	185.29	67.703		550	48.317	286.119		550	207.454
551	120.128	112.624		551	233.608	70.689		551	276.606	47.755		551	255.771	104.995		551	348.417	79.594		551	301.872	65.623		551	339.551	183.901		551	121.901	44.102		551	93.975	87.642		551	71.811	149.463		551	185.29	70.373		551	48.317	299		551	207.454
552	120.128	113.653		552	233.608	68.239		552	276.606	49.096		552	255.771	108.679		552	348.417	77.884		552	301.872	66.029		552	339.551	183.726		552	121.901	46.702		552	93.975	89.321		552	71.811	150.679		552	185.29	66.51		552	48.317	297.523		552	207.454
553	120.128	107.122		553	233.608	67.203		553	276.606	46.312		553	255.771	108.908		553	348.417	78.569		553	301.872	64.762		553	339.551	181.551		553	121.901	46.465		553	93.975	89.486		553	71.811	155.21		553	185.29	68.852		553	48.317	289.716		553	207.454
554	120.128	110.491		554	233.608	67.922		554	276.606	47.385		554	255.771	107.516		554	348.417	81.58		554	301.872	64.988		554	339.551	182.097		554	121.901	45.825		554	93.975	89.632		554	71.811	151.704		554	185.29	66.268		554	48.317	305.725		554	207.454
555	120.128	108.701		555	233.608	64.526		555	276.606	47.883		555	255.771	105.924		555	348.417	80.098		555	301.872	65.258		555	339.551	184.604		555	121.901	48.498		555	93.975	83.467		555	71.811	156.006		555	185.29	67.916		555	48.317	299.073		555	207.454
556	120.128	107.753		556	233.608	63.355		556	276.606	46.854		556	255.771	108.577		556	348.417	79.635		556	301.872	64.953		556	339.551	171.93		556	121.901	48.109		556	93.975	91.288		556	71.811	147.951		556	185.29	69.84		556	48.317	293.514		556	207.454
557	120.128	108.325		557	233.608	62.482		557	276.606	47.859		557	255.771	109.04		557	348.417	77.794		557	301.872	65.855		557	339.551	173.287		557	121.901	46.138		557	93.975	86.269		557	71.811	149.414		557	185.29	68.232		557	48.317	297.835		557	207.454
558	120.128	111.24		558	233.608	61.082		558	276.606	45.788		558	255.771	111.435		558	348.417	80.148		558	301.872	65.392		558	339.551	165.883		558	121.901	46.869		558	93.975	83.693		558	71.811	152.377		558	185.29	68.938		558	48.317	286.073		558	207.454
559	120.128	117.391		559	233.608	62.911		559	276.606	45.607		559	255.771	109.801		559	348.417	80.697		559	301.872	65.483		559	339.551	160.933		559	121.901	47.673		559	93.975	88.844		559	71.811	152.698		559	185.29	68.938		559	48.317	290.083		559	207.454
560	120.128	106.694		560	233.608	62.509		560	276.606	45.521		560	255.771	109.407		560	348.417	78.796		560	301.872	67.314		560	339.551	155.845		560	121.901	46.673		560	93.975	89.835		560	71.811	157.377		560	185.29	66.122		560	48.317	297.908		560	207.454
561	120.128	108.753		561	233.608	61.62		561	276.606	46.729		561	255.771	110.988		561	348.417	78.098		561	301.872	66.226		561	339.551	150.867		561	121.901	46.164		561	93.975	83.5		561	71.811	148.765		561	185.29	67.378		561	48.317	296.569		561	207.454
562	120.128	109.52		562	233.608	61.353		562	276.606	47.434		562	255.771	106.698		562	348.417	77.682		562	301.872	65.674		562	339.551	145.933		562	121.901	44.465		562	93.975	82.236		562	71.811	153.247		562	185.29	63.758		562	48.317	308.89		562	207.454
563	120.128	109.531		563	233.608	59.917		563	276.606	46.508		563	255.771	109.508		563	348.417	78.023		563	301.872	67.72		563	339.551	145.111		563	121.901	46.178		563	93.975	82.226		563	71.811	158.093		563	185.29	67.371		563	48.317	296.45		563	207.454
564	120.128	113.561		564	233.608	61.139		564	276.606	47.173		564	255.771	110.778		564	348.417	79.734		564	301.872	64.376		564	339.551	144.586		564	121.901	48.065		564	93.975	85.453		564	71.811	153.42		564	185.29	66.746		564	48.317	300.972		564	207.454
565	120.128	111.672		565	233.608	62.078		565	276.606	45.583		565	255.771	113.393		565	348.417	78.228		565	301.872	68.276		565	339.551	148.159		565	121.901	46.436		565	93.975	83.184		565	71.811	156.019		565	185.29	66.278		565	48.317	307.284		565	207.454
566	120.128	111.996		566	233.608	59.385		566	276.606	46.2		566	255.771	108.116		566	348.417	79.468		566	301.872	68.673		566	339.551	143.411		566	121.901	48.495		566	93.975	88.16		566	71.811	157.617		566	185.29	69.785		566	48.317	284.917		566	207.454
567	120.128	110.122		567	233.608	61.856		567	276.606	47.428		567	255.771	112.007		567	348.417	79.617		567	301.872	69.059		567	339.551	144.631		567	121.901	47.487		567	93.975	89.269		567	71.811	159.198		567	185.29	67.983		567	48.317	293.853		567	207.454
568	120.128	108.247		568	233.608	61.704		568	276.606	49.064		568	255.771	110.277		568	348.417	78.015		568	301.872	66.771		568	339.551	142.59		568	121.901	46.793		568	93.975	87.599		568	71.811	159.772		568	185.29	72.096		568	48.317	292.431		568	207.454
569	120.128	110.015		569	233.608	59.239		569	276.606	49.918		569	255.771	110.487		569	348.417	79.01		569	301.872	67.232		569	339.551	139.819		569	121.901	48.004		569	93.975	83.528		569	71.811	157.852		569	185.29	67.084		569	48.317	285.294		569	207.454
570	120.128	115.48		570	233.608	62.605		570	276.606	49.293		570	255.771	109.36		570	348.417	79.216		570	301.872	67.486		570	339.551	138.484		570	121.901	46.309		570	93.975	86.75		570	71.811	155.272		570	185.29	66.148		570	48.317	289.174		570	207.454
571	120.128	119.948		571	233.608	60.131		571	276.606	48.221		571	255.771	112.62		571	348.417	78.489		571	301.872	65.153		571	339.551	136.509		571	121.901	46.662		571	93.975	88.17		571	71.811	162.488		571	185.29	67.366		571	48.317	272.651		571	207.454
572	120.128	121.996		572	233.608	60.577		572	276.606	47.862		572	255.771	110.497		572	348.417	78.045		572	301.872	65.935		572	339.551	134.719		572	121.901	48.862		572	93.975	80.547		572	71.811	154.056		572	185.29	65.445		572	48.317	278.899		572	207.454
573	120.128	120.664		573	233.608	61.228		573	276.606	48.301		573	255.771	111.031		573	348.417	78.504		573	301.872	64.095		573	339.551	137.163		573	121.901	48.091		573	93.975	88.41		573	71.811	165.691		573	185.29	65.986		573	48.317	291.073		573	207.454
574	120.128	119.974		574	233.608	60.065		574	276.606	47.176		574	255.771	112.385		574	348.417	79.406		574	301.872	67.521		574	339.551	136.567		574	121.901	50.327		574	93.975	87.222		574	71.811	159.66		574	185.29	65.768		574	48.317	290.862		574	207.454
575	120.128	122.103		575	233.608	61.317		575	276.606	45.207		575	255.771	114.91		575	348.417	79.106		575	301.872	66.164		575	339.551	132.202		575	121.901	49.942		575	93.975	85.863		575	71.811	158.198		575	185.29	63.916		575	48.317	284.422		575	207.454
576	120.128	120.841		576	233.608	62.266		576	276.606	45.667		576	255.771	111.594		576	348.417	79.618		576	301.872	66.93		576	339.551	132.872		576	121.901	48.8		576	93.975	86.59		576	71.811	155.963		576	185.29	67.811		576	48.317	293.716		576	207.454
577	120.128	119.967		577	233.608	62.742		577	276.606	49.723		577	255.771	115.562		577	348.417	78.575		577	301.872	67.276		577	339.551	132.406		577	121.901	47.065		577	93.975	84.896		577	71.811	155.772		577	185.29	66.493		577	48.317	287.982		577	207.454
578	120.128	135.395		578	233.608	61.26		578	276.606	48.598		578	255.771	110.657		578	348.417	79.239		578	301.872	65.749		578	339.551	130.159		578	121.901	50.007		578	93.975	82.708		578	71.811	155.383		578	185.29	64.065		578	48.317	273.119		578	207.454
579	120.128	123.03		579	233.608	63.797		579	276.606	51.631		579	255.771	112.109		579	348.417	75.912		579	301.872	65.492		579	339.551	129.439		579	121.901	48.658		579	93.975	83.349		579	71.811	158.228		579	185.29	64.632		579	48.317	293.156		579	207.454
580	120.128	130.328		580	233.608	65.376		580	276.606	51.67		580	255.771	112.426		580	348.417	78.036		580	301.872	65.681		580	339.551	127.064		580	121.901	55.007		580	93.975	82.84		580	71.811	149.148		580	185.29	66.266		580	48.317	283.009		580	207.454
581	120.128	128.605		581	233.608	63.552		581	276.606	49.872		581	255.771	114.503		581	348.417	75.896		581	301.872	65.706		581	339.551	125.424		581	121.901	54.313		581	93.975	84.948		581	71.811	160.315		581	185.29	66.495		581	48.317	288.56		581	207.454
582	120.128	128.823		582	233.608	64.049		582	276.606	51.484		582	255.771	114.125		582	348.417	81.006		582	301.872	65.16		582	339.551	123.091		582	121.901	54.735		582	93.975	84.189		582	71.811	156.228		582	185.29	66.27		582	48.317	288.605		582	207.454
583	120.128	132.317		583	233.608	64.017		583	276.606	48.47		583	255.771	113.821		583	348.417	79.672		583	301.872	66.401		583	339.551	122.711		583	121.901	54.367		583	93.975	78.726		583	71.811	158.364		583	185.29	63.278		583	48.317	284.587		583	207.454
584	120.128	128.801		584	233.608	65.787		584	276.606	49.569		584	255.771	108.631		584	348.417	80.879		584	301.872	63.549		584	339.551	121.016		584	121.901	55.171		584	93.975	81.292		584	71.811	151.87		584	185.29	62.641		584	48.317	278.339		584	207.454
585	120.128	119.303		585	233.608	65.66		585	276.606	49.454		585	255.771	114.078		585	348.417	78.538		585	301.872	65.465		585	339.551	122.343		585	121.901	53.942		585	93.975	77.646		585	71.811	151.963		585	185.29	64.246		585	48.317	280.266		585	207.454
586	120.128	117.111		586	233.608	62.843		586	276.606	49.809		586	255.771	110.915		586	348.417	79.43		586	301.872	66.282		586	339.551	115.97		586	121.901	56.309		586	93.975	80.571		586	71.811	161.21		586	185.29	64.646		586	48.317	288.826		586	207.454
587	120.128	115.812		587	233.608	62.444		587	276.606	48.109		587	255.771	116.412		587	348.417	79.954		587	301.872	66.584		587	339.551	120.862		587	121.901	54.091		587	93.975	81.368		587	71.811	151.185		587	185.29	63.498		587	48.317	289.972		587	207.454
588	120.128	116.727		588	233.608	62.953		588	276.606	47.708		588	255.771	113.003		588	348.417	78.36		588	301.872	66.219		588	339.551	123.068		588	121.901	55.935		588	93.975	80.486		588	71.811	158.358		588	185.29	64.124		588	48.317	283.725		588	207.454
589	120.128	111.686		589	233.608	66.797		589	276.606	49.135		589	255.771	110.62		589	348.417	81.564		589	301.872	66.394		589	339.551	122.973		589	121.901	53.789		589	93.975	81.217		589	71.811	156.105		589	185.29	61.701		589	48.317	284.936		589	207.454
590	120.128	111.384		590	233.608	62.657		590	276.606	49.696		590	255.771	110.303		590	348.417	81.266		590	301.872	66.838		590	339.551	122.615		590	121.901	55.684		590	93.975	79.547		590	71.811	154.599		590	185.29	61.766		590	48.317	281.404		590	207.454
591	120.128	112.022		591	233.608	64.628		591	276.606	48.223		591	255.771	107.863		591	348.417	80.164		591	301.872	65.568		591	339.551	120.499		591	121.901	55.335		591	93.975	79.712		591	71.811	157.333		591	185.29	61.163		591	48.317	289.128		591	207.454
592	120.128	117.635		592	233.608	64.708		592	276.606	48.859		592	255.771	108.825		592	348.417	80.556		592	301.872	67.169		592	339.551	121.625		592	121.901	54.033		592	93.975	79.028		592	71.811	157.988		592	185.29	62.325		592	48.317	290.807		592	207.454
593	120.128	114.646		593	233.608	64.765		593	276.606	49.018		593	255.771	105.395		593	348.417	78.202		593	301.872	66.28		593	339.551	121.21		593	121.901	55.011		593	93.975	74.104		593	71.811	161.315		593	185.29	63.722		593	48.317	294.193		593	207.454
594	120.128	116.148		594	233.608	62.643		594	276.606	47.131		594	255.771	105.986		594	348.417	81.822		594	301.872	64.363		594	339.551	121.552		594	121.901	54.207		594	93.975	77.033		594	71.811	161.327		594	185.29	64.816		594	48.317	294.248		594	207.454
595	120.128	118.472		595	233.608	61.75		595	276.606	48.545		595	255.771	108.787		595	348.417	81.135		595	301.872	65.031		595	339.551	128.978		595	121.901	54.931		595	93.975	72.726		595	71.811	163.519		595	185.29	62.402		595	48.317	306.009		595	207.454
596	120.128	117.904		596	233.608	63.746		596	276.606	50.446		596	255.771	106.255		596	348.417	79.601		596	301.872	65.468		596	339.551	130.435		596	121.901	52.909		596	93.975	75.316		596	71.811	160.525		596	185.29	64.789		596	48.317	287		596	207.454
597	120.128	117.214		597	233.608	62.398		597	276.606	49.365		597	255.771	104.144		597	348.417	79.295		597	301.872	65.233		597	339.551	130.308		597	121.901	53.476		597	93.975	76.476		597	71.811	162.432		597	185.29	63.22		597	48.317	285.294		597	207.454
598	120.128	117.568		598	233.608	65.603		598	276.606	49.777		598	255.771	112.437		598	348.417	79.574		598	301.872	67.126		598	339.551	141.537		598	121.901	53.047		598	93.975	82.099		598	71.811	154.79		598	185.29	64.974		598	48.317	288.119		598	207.454
599	120.128	115.937		599	233.608	63.641		599	276.606	49.402		599	255.771	108.693		599	348.417	80.481		599	301.872	64.935		599	339.551	149.529		599	121.901	52.549		599	93.975	76.5		599	71.811	148.278		599	185.29	64.99		599	48.317	288.211		599	207.454
600	120.128	111.251		600	233.608	62.186		600	276.606	47.732		600	255.771	111.458		600	348.417	76.927		600	301.872	64.871		600	339.551	156.137		600	121.901	55.556		600	93.975	75.646		600	71.811	156.074		600	185.29	63.081		600	48.317	275.587		600	207.454
601	120.128	112.188		601	233.608	61.157		601	276.606	50.91		601	255.771	108.494		601	348.417	79.108		601	301.872	64.465		601	339.551	161.634		601	121.901	53.607		601	93.975	77.807		601	71.811	157.525		601	185.29	63.672		601	48.317	299.064		601	207.454
602	120.128	114.015		602	233.608	62.304		602	276.606	49.301		602	255.771	111.681		602	348.417	79.228		602	301.872	68.31		602	339.551	170.304		602	121.901	56.484		602	93.975	75.816		602	71.811	153.988		602	185.29	68.194		602	48.317	288.174		602	207.454
603	120.128	112.085		603	233.608	66.342		603	276.606	50.216		603	255.771	111.18		603	348.417	78.076		603	301.872	64.31		603	339.551	169.414		603	121.901	53.898		603	93.975	75.509		603	71.811	158.185		603	185.29	67.658		603	48.317	276.046		603	207.454
604	120.128	111.255		604	233.608	64.082		604	276.606	50.681		604	255.771	111.802		604	348.417	78.581		604	301.872	67.031		604	339.551	172.467		604	121.901	52.527		604	93.975	76.495		604	71.811	162.519		604	185.29	63.435		604	48.317	278.183		604	207.454
605	120.128	110.07		605	233.608	65.947		605	276.606	49.798		605	255.771	115.069		605	348.417	81.77		605	301.872	68.308		605	339.551	174.285		605	121.901	52.978		605	93.975	79.358		605	71.811	158.778		605	185.29	64.677		605	48.317	288.376		605	207.454
606	120.128	111.162		606	233.608	68.482		606	276.606	49.447		606	255.771	113.021		606	348.417	79.746		606	301.872	67.006		606	339.551	172.922		606	121.901	54.447		606	93.975	80.811		606	71.811	159.235		606	185.29	62.849		606	48.317	297.798		606	207.454
607	120.128	108.365		607	233.608	65.812		607	276.606	48.248		607	255.771	110.991		607	348.417	80.627		607	301.872	66.518		607	339.551	170.963		607	121.901	53.415		607	93.975	79.731		607	71.811	151.093		607	185.29	60.452		607	48.317	290.385		607	207.454
608	120.128	117.247		608	233.608	65.472		608	276.606	49.604		608	255.771	109.875		608	348.417	80.032		608	301.872	66.545		608	339.551	169.961		608	121.901	52.138		608	93.975	79.325		608	71.811	158.21		608	185.29	64.459		608	48.317	291.119		608	207.454
609	120.128	121.782		609	233.608	64.861		609	276.606	47.287		609	255.771	108.913		609	348.417	78.601		609	301.872	67.598		609	339.551	173.473		609	121.901	51.32		609	93.975	76.033		609	71.811	151.648		609	185.29	64.789		609	48.317	281.615		609	207.454
610	120.128	121.137		610	233.608	65.275		610	276.606	47.896		610	255.771	109.347		610	348.417	77.095		610	301.872	66.465		610	339.551	172.05		610	121.901	52.276		610	93.975	78.646		610	71.811	148.309		610	185.29	60.17		610	48.317	287.853		610	207.454
611	120.128	127.712		611	233.608	63.915		611	276.606	48.199		611	255.771	108.137		611	348.417	77.338		611	301.872	64.548		611	339.551	170.589		611	121.901	53.204		611	93.975	77.769		611	71.811	155.642		611	185.29	62.11		611	48.317	295.972		611	207.454
612	120.128	126.506		612	233.608	61.514		612	276.606	48.885		612	255.771	104.607		612	348.417	77.466		612	301.872	66.43		612	339.551	167.398		612	121.901	52.062		612	93.975	83.618		612	71.811	145.58		612	185.29	61.244		612	48.317	283		612	207.454
613	120.128	121.074		613	233.608	62.723		613	276.606	47.013		613	255.771	112.714		613	348.417	78.861		613	301.872	63.7		613	339.551	173.698		613	121.901	52.6		613	93.975	78.901		613	71.811	152.302		613	185.29	64.825		613	48.317	290.294		613	207.454
614	120.128	111.535		614	233.608	63.746		614	276.606	47.957		614	255.771	111.258		614	348.417	80.374		614	301.872	63.43		614	339.551	173.666		614	121.901	50.051		614	93.975	84.137		614	71.811	152.593		614	185.29	62.328		614	48.317	293.835		614	207.454
615	120.128	119.055		615	233.608	62.808		615	276.606	47.838		615	255.771	109.052		615	348.417	80.33		615	301.872	65.838		615	339.551	170.961		615	121.901	53.371		615	93.975	86.689		615	71.811	151.16		615	185.29	61.964		615	48.317	286.954		615	207.454
616	120.128	114.399		616	233.608	64.852		616	276.606	48.928		616	255.771	106.522		616	348.417	80.071		616	301.872	66.101		616	339.551	174.858		616	121.901	50.858		616	93.975	81.481		616	71.811	155.877		616	185.29	62.201		616	48.317	280.358		616	207.454
617	120.128	106.989		617	233.608	64.943		617	276.606	49.571		617	255.771	107.834		617	348.417	81.109		617	301.872	66.725		617	339.551	181.055		617	121.901	48.844		617	93.975	84.099		617	71.811	156.414		617	185.29	64.94		617	48.317	272.789		617	207.454
618	120.128	107.727		618	233.608	68.33		618	276.606	49.059		618	255.771	111.839		618	348.417	79.335		618	301.872	66.695		618	339.551	179.757		618	121.901	51.655		618	93.975	85.708		618	71.811	162.525		618	185.29	63.282		618	48.317	275.587		618	207.454
619	120.128	111.494		619	233.608	68.583		619	276.606	49.245		619	255.771	108.811		619	348.417	79.579		619	301.872	64.097		619	339.551	185.094		619	121.901	46.676		619	93.975	89.538		619	71.811	155.185		619	185.29	64.916		619	48.317	268.706		619	207.454
620	120.128	113.103		620	233.608	65.528		620	276.606	47.995		620	255.771	108.009		620	348.417	81.401		620	301.872	66.194		620	339.551	179.222		620	121.901	51.051		620	93.975	89.759		620	71.811	153.012		620	185.29	64.742		620	48.317	283.67		620	207.454
621	120.128	115.749		621	233.608	67.588		621	276.606	48.83		621	255.771	107.716		621	348.417	81.41		621	301.872	62.937		621	339.551	178.027		621	121.901	49.4		621	93.975	85.953		621	71.811	156.401		621	185.29	62.356		621	48.317	277.844		621	207.454
622	120.128	119.148		622	233.608	70.021		622	276.606	47.008		622	255.771	110.929		622	348.417	81.472		622	301.872	63.667		622	339.551	180.334		622	121.901	49.735		622	93.975	90.458		622	71.811	152.938		622	185.29	64.354		622	48.317	283.495		622	207.454
623	120.128	111.137		623	233.608	67.328		623	276.606	46.46		623	255.771	112.407		623	348.417	81.125		623	301.872	63.552		623	339.551	179.471		623	121.901	47.018		623	93.975	85.726		623	71.811	155.889		623	185.29	62.689		623	48.317	282.119		623	207.454
624	120.128	114.465		624	233.608	65.594		624	276.606	47.912		624	255.771	110.664		624	348.417	81.061		624	301.872	64.765		624	339.551	174.339		624	121.901	50.287		624	93.975	88.882		624	71.811	154.623		624	185.29	65.541		624	48.317	277.45		624	207.454
625	120.128	115.185		625	233.608	65.516		625	276.606	46.726		625	255.771	114.44		625	348.417	77.737		625	301.872	64.963		625	339.551	176.603		625	121.901	48.458		625	93.975	90.132		625	71.811	150.796		625	185.29	66.261		625	48.317	266.917		625	207.454
626	120.128	113.69		626	233.608	67.102		626	276.606	46.72		626	255.771	112.726		626	348.417	79.64		626	301.872	64.746		626	339.551	172.573		626	121.901	46.844		626	93.975	90.316		626	71.811	147.13		626	185.29	66.414		626	48.317	292.752		626	207.454
627	120.128	119.428		627	233.608	66.852		627	276.606	49.777		627	255.771	111.804		627	348.417	77.785		627	301.872	64.731		627	339.551	176.245		627	121.901	50.633		627	93.975	87.184		627	71.811	158.617		627	185.29	67.978		627	48.317	282.615		627	207.454
628	120.128	113.122		628	233.608	68.431		628	276.606	47.056		628	255.771	110.523		628	348.417	79.816		628	301.872	64.57		628	339.551	178.352		628	121.901	47.535		628	93.975	90.316		628	71.811	160.519		628	185.29	67.883		628	48.317	277.385		628	207.454
629	120.128	119.967		629	233.608	67.565		629	276.606	47.042		629	255.771	111.229		629	348.417	79.561		629	301.872	66.567		629	339.551	177.859		629	121.901	48.2		629	93.975	88.698		629	71.811	147.759		629	185.29	67.653		629	48.317	267.67		629	207.454
630	120.128	115.79		630	233.608	68.004		630	276.606	46.431		630	255.771	110.842		630	348.417	80.473		630	301.872	64.112		630	339.551	176.986		630	121.901	49.16		630	93.975	93.557		630	71.811	153.852		630	185.29	67.615		630	48.317	279.266		630	207.454
631	120.128	111.86		631	233.608	70.922		631	276.606	49.505		631	255.771	109.461		631	348.417	81.12		631	301.872	66.574		631	339.551	171.892		631	121.901	46.956		631	93.975	87.292		631	71.811	152.111		631	185.29	68.268		631	48.317	278.532		631	207.454
632	120.128	116.273		632	233.608	67.478		632	276.606	47.715		632	255.771	110.905		632	348.417	79.912		632	301.872	65.188		632	339.551	173.565		632	121.901	46.116		632	93.975	88.354		632	71.811	145.765		632	185.29	67.684		632	48.317	288.147		632	207.454
633	120.128	118.332		633	233.608	68.882		633	276.606	49.949		633	255.771	109.518		633	348.417	79.514		633	301.872	64.101		633	339.551	169.232		633	121.901	49.76		633	93.975	87.627		633	71.811	145.864		633	185.29	66.639		633	48.317	274.064		633	207.454
634	120.128	116.266		634	233.608	72.996		634	276.606	49.888		634	255.771	107.572		634	348.417	78.957		634	301.872	65.677		634	339.551	166.683		634	121.901	47.007		634	93.975	92.448		634	71.811	148.16		634	185.29	65.447		634	48.317	264.119		634	207.454
635	120.128	110.292		635	233.608	68.376		635	276.606	48.769		635	255.771	109.718		635	348.417	78.515		635	301.872	64.358		635	339.551	170.542		635	121.901	47.815		635	93.975	88.406		635	71.811	147.438		635	185.29	66.526		635	48.317	262.651		635	207.454
636	120.128	113.731		636	233.608	71.154		636	276.606	47.853		636	255.771	107.421		636	348.417	77.644		636	301.872	65.57		636	339.551	169.709		636	121.901	44.516		636	93.975	92.344		636	71.811	147.549		636	185.29	61.641		636	48.317	263.376		636	207.454
637	120.128	117.162		637	233.608	71.025		637	276.606	48.832		637	255.771	107.128		637	348.417	80.648		637	301.872	63.91		637	339.551	169.898		637	121.901	47.262		637	93.975	93.58		637	71.811	142.994		637	185.29	62.804		637	48.317	274.165		637	207.454
638	120.128	115.565		638	233.608	69.288		638	276.606	49.266		638	255.771	104.399		638	348.417	79.634		638	301.872	66.044		638	339.551	166.826		638	121.901	47.233		638	93.975	97.042		638	71.811	155.21		638	185.29	62.945		638	48.317	271.468		638	207.454
639	120.128	113.923		639	233.608	67.565		639	276.606	48.944		639	255.771	108.908		639	348.417	77.73		639	301.872	67.733		639	339.551	166.116		639	121.901	45.749		639	93.975	95.269		639	71.811	152.352		639	185.29	61.993		639	48.317	265.514		639	207.454
640	120.128	112.421		640	233.608	69.562		640	276.606	48.205		640	255.771	107.198		640	348.417	78.887		640	301.872	66.552		640	339.551	163.45		640	121.901	47.084		640	93.975	93.42		640	71.811	146.352		640	185.29	66.22		640	48.317	275.239		640	207.454
641	120.128	115.321		641	233.608	69.968		641	276.606	48.827		641	255.771	104.894		641	348.417	80.561		641	301.872	64.364		641	339.551	167.341		641	121.901	49.2		641	93.975	93.67		641	71.811	149.117		641	185.29	64.768		641	48.317	275.376		641	207.454
642	120.128	112.173		642	233.608	72.677		642	276.606	49.545		642	255.771	106.059		642	348.417	79.944		642	301.872	66.709		642	339.551	162.129		642	121.901	46.345		642	93.975	93.014		642	71.811	146		642	185.29	64.548		642	48.317	263.541		642	207.454
643	120.128	118.686		643	233.608	68.461		643	276.606	49.579		643	255.771	106.927		643	348.417	82.162		643	301.872	64.681		643	339.551	157.927		643	121.901	47.48		643	93.975	99.151		643	71.811	145.636		643	185.29	66.995		643	48.317	262.229		643	207.454
644	120.128	118.941		644	233.608	69.789		644	276.606	49.756		644	255.771	109.608		644	348.417	78.216		644	301.872	63.173		644	339.551	161.508		644	121.901	46.142		644	93.975	101.67		644	71.811	155.716		644	185.29	67.175		644	48.317	287.294		644	207.454
645	120.128	111.738		645	233.608	71.106		645	276.606	47.872		645	255.771	105.761		645	348.417	78.838		645	301.872	65.696		645	339.551	152.768		645	121.901	47.644		645	93.975	97.203		645	71.811	146.222		645	185.29	66.067		645	48.317	282.33		645	207.454
646	120.128	117.244		646	233.608	72.531		646	276.606	45.986		646	255.771	105.191		646	348.417	81.463		646	301.872	66.655		646	339.551	154.364		646	121.901	47.658		646	93.975	94.165		646	71.811	146.63		646	185.29	66.5		646	48.317	274.541		646	207.454
647	120.128	124.69		647	233.608	70.264		647	276.606	47.83		647	255.771	107.702		647	348.417	78.503		647	301.872	62.805		647	339.551	153.957		647	121.901	45.796		647	93.975	93.627		647	71.811	153.019		647	185.29	68.337		647	48.317	266.037		647	207.454
648	120.128	124.443		648	233.608	72.691		648	276.606	47.7		648	255.771	107.522		648	348.417	78.411		648	301.872	65.54		648	339.551	154.474		648	121.901	45.145		648	93.975	94.552		648	71.811	152.994		648	185.29	66.919		648	48.317	264.771		648	207.454
649	120.128	130.055		649	233.608	71.205		649	276.606	48.074		649	255.771	107.972		649	348.417	80.64		649	301.872	66.112		649	339.551	153.377		649	121.901	44.004		649	93.975	90.401		649	71.811	153.395		649	185.29	69.574		649	48.317	270.294		649	207.454
650	120.128	132.509		650	233.608	70.702		650	276.606	46.848		650	255.771	111.334		650	348.417	82.162		650	301.872	64.439		650	339.551	150.352		650	121.901	46.604		650	93.975	94.731		650	71.811	154.457		650	185.29	67.146		650	48.317	266.385		650	207.454
651	120.128	125.321		651	233.608	71.757		651	276.606	46.793		651	255.771	106.692		651	348.417	83.749		651	301.872	64.51		651	339.551	153.056		651	121.901	44.749		651	93.975	94.189		651	71.811	154.525		651	185.29	68.467		651	48.317	265.881		651	207.454
652	120.128	132.214		652	233.608	74.374		652	276.606	50.107		652	255.771	107.378		652	348.417	79.48		652	301.872	66.762		652	339.551	151.602		652	121.901	47.945		652	93.975	91.736		652	71.811	145.623		652	185.29	70.56		652	48.317	262.514		652	207.454
653	120.128	131.428		653	233.608	72.008		653	276.606	46.179		653	255.771	107.932		653	348.417	78.261		653	301.872	63.536		653	339.551	150.796		653	121.901	45.073		653	93.975	90.651		653	71.811	154.352		653	185.29	66.928		653	48.317	270.605		653	207.454
654	120.128	128.635		654	233.608	73.569		654	276.606	48.314		654	255.771	105.425		654	348.417	79.943		654	301.872	64.402		654	339.551	147.154		654	121.901	47.396		654	93.975	89.434		654	71.811	146.759		654	185.29	66.816		654	48.317	268.128		654	207.454
655	120.128	123.055		655	233.608	73.082		655	276.606	47.671		655	255.771	105.551		655	348.417	79.066		655	301.872	65.875		655	339.551	149.034		655	121.901	43.516		655	93.975	92.085		655	71.811	148.056		655	185.29	66.179		655	48.317	263.294		655	207.454
656	120.128	121.734		656	233.608	71.782		656	276.606	46.343		656	255.771	104.913		656	348.417	79.995		656	301.872	66.443		656	339.551	151.687		656	121.901	42.935		656	93.975	94.019		656	71.811	150.562		656	185.29	67.526		656	48.317	278.009		656	207.454
657	120.128	118.934		657	233.608	69.569		657	276.606	46.41		657	255.771	109.043		657	348.417	80.06		657	301.872	68.772		657	339.551	150.544		657	121.901	45.516		657	93.975	88.981		657	71.811	150.531		657	185.29	67.644		657	48.317	270.605		657	207.454
658	120.128	117.734		658	233.608	69.909		658	276.606	47.513		658	255.771	109.137		658	348.417	78.884		658	301.872	64.539		658	339.551	148.29		658	121.901	47.88		658	93.975	90.34		658	71.811	154.475		658	185.29	66.144		658	48.317	268.761		658	207.454
659	120.128	109.838		659	233.608	68.691		659	276.606	46.439		659	255.771	107.664		659	348.417	78.81		659	301.872	67.664		659	339.551	146.369		659	121.901	46.124		659	93.975	91.335		659	71.811	156.827		659	185.29	65.519		659	48.317	271.936		659	207.454
660	120.128	106.299		660	233.608	67.076		660	276.606	48.213		660	255.771	110.416		660	348.417	79.893		660	301.872	64.012		660	339.551	150.924		660	121.901	45.367		660	93.975	90.877		660	71.811	151.673		660	185.29	63.093		660	48.317	290.661		660	207.454
661	120.128	115.133		661	233.608	61.835		661	276.606	47.894		661	255.771	109.853		661	348.417	78.635		661	301.872	66.013		661	339.551	149.07		661	121.901	47.622		661	93.975	90.759		661	71.811	152.093		661	185.29	64.612		661	48.317	278.789		661	207.454
662	120.128	109.247		662	233.608	59.825		662	276.606	48.731		662	255.771	109.267		662	348.417	78.587		662	301.872	63.913		662	339.551	146.943		662	121.901	46.629		662	93.975	88.854		662	71.811	158.432		662	185.29	65.089		662	48.317	279.789		662	207.454
663	120.128	107.638		663	233.608	58.148		663	276.606	46.191		663	255.771	104.664		663	348.417	80.482		663	301.872	67.665		663	339.551	150.547		663	121.901	45.855		663	93.975	86.222		663	71.811	158.278		663	185.29	66.019		663	48.317	277.495		663	207.454
664	120.128	102.565		664	233.608	55.066		664	276.606	47.218		664	255.771	106.149		664	348.417	79.247		664	301.872	66.48		664	339.551	149.343		664	121.901	44.556		664	93.975	86.783		664	71.811	153.049		664	185.29	66.435		664	48.317	279.972		664	207.454
665	120.128	105.074		665	233.608	55.926		665	276.606	46.101		665	255.771	107.582		665	348.417	80.053		665	301.872	65.552		665	339.551	155.107		665	121.901	43.349		665	93.975	88.292		665	71.811	150.42		665	185.29	61.725		665	48.317	276.945		665	207.454
666	120.128	111.207		666	233.608	57.653		666	276.606	46.338		666	255.771	106.334		666	348.417	78.514		666	301.872	65.637		666	339.551	152.791		666	121.901	47.775		666	93.975	87.962		666	71.811	153.037		666	185.29	62.258		666	48.317	282.064		666	207.454
667	120.128	102.288		667	233.608	58.26		667	276.606	48.622		667	255.771	109.179		667	348.417	80.188		667	301.872	64.477		667	339.551	152.574		667	121.901	46.927		667	93.975	87.08		667	71.811	150.111		667	185.29	63.794		667	48.317	278.67		667	207.454
668	120.128	107.716		668	233.608	58.924		668	276.606	46.825		668	255.771	108.437		668	348.417	81.644		668	301.872	65.483		668	339.551	154.816		668	121.901	47.367		668	93.975	86.325		668	71.811	153.302		668	185.29	65.287		668	48.317	278.275		668	207.454
669	120.128	101.546		669	233.608	60.152		669	276.606	46.888		669	255.771	108.423		669	348.417	79.132		669	301.872	62.959		669	339.551	150.813		669	121.901	44.371		669	93.975	87.575		669	71.811	154.019		669	185.29	62.818		669	48.317	276.486		669	207.454
670	120.128	96.081		670	233.608	61.414		670	276.606	48.931		670	255.771	106.839		670	348.417	79.322		670	301.872	64.555		670	339.551	155.952		670	121.901	46.08		670	93.975	80.415		670	71.811	156.722		670	185.29	64.919		670	48.317	273.385		670	207.454
671	120.128	99.731		671	233.608	61.543		671	276.606	47.962		671	255.771	107.257		671	348.417	80.361		671	301.872	65.11		671	339.551	154.08		671	121.901	47.702		671	93.975	84.264		671	71.811	154.852		671	185.29	65.868		671	48.317	266.532		671	207.454
672	120.128	103.598		672	233.608	62.34		672	276.606	48.189		672	255.771	106.688		672	348.417	79.879		672	301.872	64.072		672	339.551	148.856		672	121.901	42.265		672	93.975	87.033		672	71.811	155.105		672	185.29	64.148		672	48.317	272.541		672	207.454
673	120.128	100.989		673	233.608	63.186		673	276.606	47.285		673	255.771	108.697		673	348.417	80.762		673	301.872	68.01		673	339.551	149.719		673	121.901	45.207		673	93.975	85.349		673	71.811	152.309		673	185.29	64.445		673	48.317	281.743		673	207.454
674	120.128	97.989		674	233.608	66.503		674	276.606	47.043		674	255.771	110.818		674	348.417	80.561		674	301.872	65.034		674	339.551	152.422		674	121.901	46.538		674	93.975	85.627		674	71.811	154.932		674	185.29	66.761		674	48.317	274.44		674	207.454
675	120.128	101.841		675	233.608	67.854		675	276.606	46.247		675	255.771	109.378		675	348.417	80.341		675	301.872	66.314		675	339.551	152.683		675	121.901	46.025		675	93.975	83.519		675	71.811	152.469		675	185.29	68.289		675	48.317	259.697		675	207.454
676	120.128	101.554		676	233.608	71.913		676	276.606	44.447		676	255.771	106.135		676	348.417	79.707		676	301.872	65.314		676	339.551	149.798		676	121.901	45.764		676	93.975	91.59		676	71.811	153.08		676	185.29	64.995		676	48.317	272.376		676	207.454
677	120.128	103.14		677	233.608	70.746		677	276.606	45.106		677	255.771	107.664		677	348.417	78.307		677	301.872	64.228		677	339.551	150.091		677	121.901	48.015		677	93.975	88.698		677	71.811	145.969		677	185.29	66.629		677	48.317	261.44		677	207.454
678	120.128	99.159		678	233.608	73.865		678	276.606	45.25		678	255.771	107		678	348.417	79.099		678	301.872	66.289		678	339.551	150.238		678	121.901	45.258		678	93.975	88.151		678	71.811	155.136		678	185.29	64.804		678	48.317	281.339		678	207.454
679	120.128	103.343		679	233.608	74		679	276.606	45.192		679	255.771	110.345		679	348.417	79.433		679	301.872	65.025		679	339.551	150.496		679	121.901	47.749		679	93.975	86.561		679	71.811	147.802		679	185.29	63.435		679	48.317	263.349		679	207.454
680	120.128	102.413		680	233.608	71.861		680	276.606	46.186		680	255.771	109.407		680	348.417	80.224		680	301.872	65.289		680	339.551	152.645		680	121.901	46.985		680	93.975	85.608		680	71.811	150.58		680	185.29	61.309		680	48.317	274.147		680	207.454
681	120.128	100.159		681	233.608	75.083		681	276.606	47.383		681	255.771	109.931		681	348.417	78.205		681	301.872	66.292		681	339.551	150.7		681	121.901	45.902		681	93.975	83.33		681	71.811	149.315		681	185.29	66.648		681	48.317	249.514		681	207.454
682	120.128	109.03		682	233.608	74.154		682	276.606	45.434		682	255.771	106.896		682	348.417	79.093		682	301.872	64.946		682	339.551	152.65		682	121.901	49.556		682	93.975	85.014		682	71.811	152.543		682	185.29	66.718		682	48.317	257.092		682	207.454
683	120.128	111.188		683	233.608	75.649		683	276.606	46.059		683	255.771	106.12		683	348.417	79.053		683	301.872	65.104		683	339.551	148.984		683	121.901	47.829		683	93.975	81.476		683	71.811	146.593		683	185.29	63.464		683	48.317	268.156		683	207.454
684	120.128	108.948		684	233.608	74.44		684	276.606	45.237		684	255.771	106.768		684	348.417	80.975		684	301.872	68.069		684	339.551	151.03		684	121.901	46.145		684	93.975	81.58		684	71.811	152.802		684	185.29	63.897		684	48.317	265.807		684	207.454
685	120.128	113.878		685	233.608	76.178		685	276.606	46.106		685	255.771	105.605		685	348.417	77.089		685	301.872	65.83		685	339.551	150.701		685	121.901	46.556		685	93.975	83.958		685	71.811	149.444		685	185.29	65.211		685	48.317	257.771		685	207.454
686	120.128	112.185		686	233.608	75.861		686	276.606	45.33		686	255.771	106.704		686	348.417	78.662		686	301.872	67.046		686	339.551	153.149		686	121.901	46.615		686	93.975	85.396		686	71.811	153.049		686	185.29	64.342		686	48.317	256.615		686	207.454
687	120.128	106.03		687	233.608	76.552		687	276.606	45.684		687	255.771	108.815		687	348.417	76.846		687	301.872	64.253		687	339.551	153.825		687	121.901	43.895		687	93.975	90.708		687	71.811	155.944		687	185.29	65.211		687	48.317	266.211		687	207.454
688	120.128	106.701		688	233.608	71.357		688	276.606	47.024		688	255.771	106.752		688	348.417	78.26		688	301.872	65.098		688	339.551	153.901		688	121.901	46.433		688	93.975	79.453		688	71.811	161.111		688	185.29	65.108		688	48.317	256.734		688	207.454
689	120.128	112.007		689	233.608	72.7		689	276.606	46.37		689	255.771	108.251		689	348.417	78.644		689	301.872	64.759		689	339.551	156.291		689	121.901	48.913		689	93.975	82.948		689	71.811	151.444		689	185.29	61.337		689	48.317	280.055		689	207.454
690	120.128	115.258		690	233.608	73.899		690	276.606	46.721		690	255.771	108.601		690	348.417	78.744		690	301.872	65.019		690	339.551	155.296		690	121.901	44.996		690	93.975	89.637		690	71.811	156.5		690	185.29	61.543		690	48.317	273.22		690	207.454
691	120.128	116.882		691	233.608	70.67		691	276.606	46.144		691	255.771	107.948		691	348.417	79.919		691	301.872	65.474		691	339.551	158.364		691	121.901	45.844		691	93.975	83.83		691	71.811	148.994		691	185.29	62.727		691	48.317	281.459		691	207.454
692	120.128	124.059		692	233.608	70.101		692	276.606	45.732		692	255.771	106.289		692	348.417	78.812		692	301.872	66.185		692	339.551	158.138		692	121.901	47.836		692	93.975	80.486		692	71.811	149.981		692	185.29	60.141		692	48.317	282.44		692	207.454
693	120.128	110.952		693	233.608	72.268		693	276.606	47.034		693	255.771	107.23		693	348.417	77.378		693	301.872	65.906		693	339.551	162.204		693	121.901	46.618		693	93.975	81.962		693	71.811	146.846		693	185.29	60.289		693	48.317	280.532		693	207.454
694	120.128	108.369		694	233.608	73.896		694	276.606	44.183		694	255.771	110.392		694	348.417	77.487		694	301.872	65.642		694	339.551	159.206		694	121.901	44.702		694	93.975	87.788		694	71.811	147.753		694	185.29	63.045		694	48.317	274.817		694	207.454
695	120.128	108.266		695	233.608	78.127		695	276.606	46.615		695	255.771	109.778		695	348.417	80.001		695	301.872	65.53		695	339.551	162.226		695	121.901	45.658		695	93.975	85.288		695	71.811	146.247		695	185.29	62.806		695	48.317	262.725		695	207.454
696	120.128	110.974		696	233.608	72.48		696	276.606	45.604		696	255.771	111.894		696	348.417	79.712		696	301.872	66.869		696	339.551	160.309		696	121.901	45.051		696	93.975	83.486		696	71.811	150.099		696	185.29	61.895		696	48.317	272.679		696	207.454
697	120.128	115.801		697	233.608	76.252		697	276.606	43.926		697	255.771	114.047		697	348.417	78.892		697	301.872	65.514		697	339.551	159.88		697	121.901	48.247		697	93.975	81.179		697	71.811	141.302		697	185.29	59.935		697	48.317	278.312		697	207.454
698	120.128	112.483		698	233.608	74.089		698	276.606	46.532		698	255.771	115.055		698	348.417	76.403		698	301.872	65.822		698	339.551	161.172		698	121.901	48.771		698	93.975	86.052		698	71.811	150.938		698	185.29	58.084		698	48.317	278.193		698	207.454
699	120.128	110.76		699	233.608	76.524		699	276.606	45.998		699	255.771	113.662		699	348.417	77.975		699	301.872	65.783		699	339.551	164.413		699	121.901	46.658		699	93.975	88.679		699	71.811	148.13		699	185.29	55.935		699	48.317	261.156		699	207.454
700	120.128	116.074		700	233.608	72.359		700	276.606	45.833		700	255.771	115.724		700	348.417	78.103		700	301.872	65.744		700	339.551	162.795		700	121.901	48.775		700	93.975	86.321		700	71.811	149.407		700	185.29	58.756		700	48.317	262.55		700	207.454
701	120.128	115.948		701	233.608	71.871		701	276.606	46.688		701	255.771	117.308		701	348.417	76.803		701	301.872	66.254		701	339.551	165.27		701	121.901	44.975		701	93.975	83.057		701	71.811	150.84		701	185.29	53.809		701	48.317	257.716		701	207.454
702	120.128	113.978		702	233.608	68.825		702	276.606	46.208		702	255.771	115.702		702	348.417	77.588		702	301.872	68.305		702	339.551	158.112		702	121.901	44.618		702	93.975	82.892		702	71.811	143.877		702	185.29	57.459		702	48.317	274.697		702	207.454
703	120.128	113.306		703	233.608	67.472		703	276.606	46.688		703	255.771	114.002		703	348.417	77.314		703	301.872	65.746		703	339.551	158.939		703	121.901	46.331		703	93.975	87.156		703	71.811	147.426		703	185.29	56.644		703	48.317	269.615		703	207.454
704	120.128	112.749		704	233.608	66.59		704	276.606	48.107		704	255.771	118.551		704	348.417	77.606		704	301.872	64.568		704	339.551	158.537		704	121.901	47.935		704	93.975	83.335		704	71.811	138.716		704	185.29	54.62		704	48.317	265.367		704	207.454
705	120.128	107.598		705	233.608	66.192		705	276.606	45.22		705	255.771	115.782		705	348.417	78.332		705	301.872	64.254		705	339.551	161.059		705	121.901	50.905		705	93.975	87.33		705	71.811	146.136		705	185.29	56.289		705	48.317	267.725		705	207.454
706	120.128	111.989		706	233.608	65.051		706	276.606	46.954		706	255.771	116.237		706	348.417	77.116		706	301.872	64.549		706	339.551	162.624		706	121.901	49.418		706	93.975	80.929		706	71.811	143.148		706	185.29	54.201		706	48.317	265.532		706	207.454
707	120.128	110.649		707	233.608	65.979		707	276.606	46.011		707	255.771	116.967		707	348.417	76.099		707	301.872	64.805		707	339.551	159.905		707	121.901	47.36		707	93.975	84.495		707	71.811	147.272		707	185.29	56.273		707	48.317	251.376		707	207.454
708	120.128	107.701		708	233.608	65.14		708	276.606	47.163		708	255.771	119.099		708	348.417	76.705		708	301.872	65.93		708	339.551	158.183		708	121.901	45.596		708	93.975	87.934		708	71.811	143.574		708	185.29	55.481		708	48.317	264.11		708	207.454
709	120.128	103.266		709	233.608	64.977		709	276.606	46.792		709	255.771	117.893		709	348.417	75.448		709	301.872	63.752		709	339.551	163.568		709	121.901	47.931		709	93.975	79.967		709	71.811	137.012		709	185.29	53.856		709	48.317	265.44		709	207.454
710	120.128	105.941		710	233.608	62.624		710	276.606	46.95		710	255.771	121.458		710	348.417	78.59		710	301.872	65.355		710	339.551	159.373		710	121.901	47.909		710	93.975	81.264		710	71.811	145.549		710	185.29	54.266		710	48.317	258.642		710	207.454
711	120.128	112.472		711	233.608	62.285		711	276.606	49.282		711	255.771	118.225		711	348.417	77.168		711	301.872	64.141		711	339.551	163.086		711	121.901	45.713		711	93.975	90.547		711	71.811	143.216		711	185.29	56.866		711	48.317	254.376		711	207.454
712	120.128	109.258		712	233.608	63.03		712	276.606	49.152		712	255.771	117.13		712	348.417	77.165		712	301.872	62.344		712	339.551	161.47		712	121.901	49.702		712	93.975	94.882		712	71.811	145.019		712	185.29	53.086		712	48.317	265.661		712	207.454
713	120.128	105.491		713	233.608	60.209		713	276.606	47.981		713	255.771	119.816		713	348.417	79.962		713	301.872	64.327		713	339.551	163.544		713	121.901	47.556		713	93.975	88.099		713	71.811	145.401		713	185.29	54.699		713	48.317	253.716		713	207.454
714	120.128	106.557		714	233.608	61.863		714	276.606	49.12		714	255.771	119.884		714	348.417	76.186		714	301.872	61.203		714	339.551	165.004		714	121.901	48.062		714	93.975	91.425		714	71.811	137.969		714	185.29	55.132		714	48.317	264.45		714	207.454
715	120.128	109.28		715	233.608	62.715		715	276.606	49.657		715	255.771	122.208		715	348.417	78.24		715	301.872	64.091		715	339.551	166.899		715	121.901	47.24		715	93.975	87.42		715	71.811	138.389		715	185.29	54.667		715	48.317	270.56		715	207.454
716	120.128	104.328		716	233.608	59.814		716	276.606	46.989		716	255.771	118.747		716	348.417	77.337		716	301.872	60.618		716	339.551	164.213		716	121.901	49.68		716	93.975	89.406		716	71.811	135.531		716	185.29	56.273		716	48.317	257.303		716	207.454
717	120.128	110.343		717	233.608	61.888		717	276.606	47.151		717	255.771	124.437		717	348.417	78.258		717	301.872	62.727		717	339.551	165.373		717	121.901	46.793		717	93.975	87.736		717	71.811	147.71		717	185.29	56.543		717	48.317	261.743		717	207.454
718	120.128	108.321		718	233.608	59.619		718	276.606	47.878		718	255.771	118.806		718	348.417	80.385		718	301.872	64.404		718	339.551	169.941		718	121.901	46.055		718	93.975	89.297		718	71.811	142.29		718	185.29	59.289		718	48.317	242.073		718	207.454
719	120.128	113.266		719	233.608	58.454		719	276.606	49.325		719	255.771	121.146		719	348.417	78.525		719	301.872	63.48		719	339.551	168.479		719	121.901	46.436		719	93.975	88.542		719	71.811	136.198		719	185.29	57.261		719	48.317	271.587		719	207.454
720	120.128	110.362		720	233.608	58.013		720	276.606	48.712		720	255.771	122.099		720	348.417	78.331		720	301.872	63.48		720	339.551	170.706		720	121.901	46.469		720	93.975	88.764		720	71.811	144.253		720	185.29	58.179		720	48.317	258.862		720	207.454
721	120.128	113.148		721	233.608	58.385		721	276.606	49.143		721	255.771	120.629		721	348.417	78.592		721	301.872	62.335		721	339.551	167.49		721	121.901	45.295		721	93.975	93.92		721	71.811	134.747		721	185.29	58.923		721	48.317	245.734		721	207.454
722	120.128	117.838		722	233.608	59.393		722	276.606	48.651		722	255.771	119.308		722	348.417	77.617		722	301.872	64.778		722	339.551	166.478		722	121.901	46.705		722	93.975	90.307		722	71.811	141.086		722	185.29	58.545		722	48.317	245.908		722	207.454
723	120.128	117.133		723	233.608	57.315		723	276.606	47.617		723	255.771	122.22		723	348.417	78.296		723	301.872	62.99		723	339.551	164.262		723	121.901	46.287		723	93.975	90.637		723	71.811	137.562		723	185.29	56.957		723	48.317	238.624		723	207.454
724	120.128	119.177		724	233.608	57.613		724	276.606	49.458		724	255.771	118.109		724	348.417	77.349		724	301.872	62.301		724	339.551	168.299		724	121.901	47.091		724	93.975	85.325		724	71.811	140.099		724	185.29	55.512		724	48.317	255.761		724	207.454
725	120.128	117.284		725	233.608	53.442		725	276.606	48.646		725	255.771	121.692		725	348.417	78.609		725	301.872	62.862		725	339.551	165.88		725	121.901	44.942		725	93.975	91.038		725	71.811	147.796		725	185.29	58.62		725	48.317	250.312		725	207.454
726	120.128	113.232		726	233.608	52.841		726	276.606	49.111		726	255.771	120.026		726	348.417	77.907		726	301.872	63.943		726	339.551	167.435		726	121.901	46.945		726	93.975	89.566		726	71.811	146.593		726	185.29	59.823		726	48.317	235.266		726	207.454
727	120.128	109.155		727	233.608	50.581		727	276.606	50.647		727	255.771	119.114		727	348.417	77.481		727	301.872	63.612		727	339.551	168.078		727	121.901	47.124		727	93.975	91.792		727	71.811	145.309		727	185.29	60.129		727	48.317	242.395		727	207.454
728	120.128	114.963		728	233.608	50.028		728	276.606	48.55		728	255.771	118.588		728	348.417	77.014		728	301.872	64.69		728	339.551	165.664		728	121.901	45.738		728	93.975	85.137		728	71.811	147.765		728	185.29	63.297		728	48.317	233.761		728	207.454
729	120.128	112.583		729	233.608	50.159		729	276.606	48.752		729	255.771	122.634		729	348.417	79.398		729	301.872	63.275		729	339.551	164.163		729	121.901	47.051		729	93.975	91.396		729	71.811	138.481		729	185.29	62.218		729	48.317	241.899		729	207.454
730	120.128	101.849		730	233.608	49.791		730	276.606	51.287		730	255.771	117.645		730	348.417	77.925		730	301.872	64.167		730	339.551	165.265		730	121.901	46.92		730	93.975	86.406		730	71.811	143.074		730	185.29	63.038		730	48.317	235.183		730	207.454
731	120.128	101.458		731	233.608	51.378		731	276.606	50.356		731	255.771	119.263		731	348.417	79.517		731	301.872	61.709		731	339.551	163.215		731	121.901	46.098		731	93.975	92.071		731	71.811	145.981		731	185.29	62.928		731	48.317	241.431		731	207.454
732	120.128	101.343		732	233.608	49.683		732	276.606	49.16		732	255.771	118.636		732	348.417	78.766		732	301.872	60.446		732	339.551	165.245		732	121.901	45.131		732	93.975	89.656		732	71.811	138.611		732	185.29	60.744		732	48.317	252.927		732	207.454
733	120.128	104.62		733	233.608	52.387		733	276.606	48.5		733	255.771	119.392		733	348.417	75.635		733	301.872	62.216		733	339.551	167.616		733	121.901	46.265		733	93.975	91.778		733	71.811	147.92		733	185.29	59.821		733	48.317	254.33		733	207.454
734	120.128	105.797		734	233.608	51.782		734	276.606	48.425		734	255.771	121.466		734	348.417	80.01		734	301.872	62.131		734	339.551	171.55		734	121.901	46.36		734	93.975	89.08		734	71.811	143.16		734	185.29	62.512		734	48.317	242.028		734	207.454
735	120.128	100.542		735	233.608	54.285		735	276.606	48.635		735	255.771	120.799		735	348.417	78.461		735	301.872	62.645		735	339.551	169.584		735	121.901	46.098		735	93.975	94.118		735	71.811	137.648		735	185.29	63.799		735	48.317	229.477		735	207.454
736	120.128	104.133		736	233.608	57.901		736	276.606	50.447		736	255.771	121.421		736	348.417	77.987		736	301.872	61.686		736	339.551	173.026		736	121.901	45		736	93.975	91.802		736	71.811	146.16		736	185.29	64.409		736	48.317	245.239		736	207.454
737	120.128	102.93		737	233.608	57.034		737	276.606	49.635		737	255.771	123.87		737	348.417	78.682		737	301.872	61.756		737	339.551	173.394		737	121.901	44.902		737	93.975	87.241		737	71.811	134.593		737	185.29	62.715		737	48.317	249.431		737	207.454
738	120.128	107.782		738	233.608	60.139		738	276.606	47.928		738	255.771	122.53		738	348.417	77.691		738	301.872	62.772		738	339.551	175.221		738	121.901	46.371		738	93.975	93.877		738	71.811	142.5		738	185.29	64.321		738	48.317	250.67		738	207.454
739	120.128	101.369		739	233.608	59.896		739	276.606	49.756		739	255.771	117.128		739	348.417	77.999		739	301.872	61.082		739	339.551	179.144		739	121.901	46.258		739	93.975	94.476		739	71.811	146.858		739	185.29	63.646		739	48.317	241.119		739	207.454
740	120.128	101.151		740	233.608	62.393		740	276.606	49.646		740	255.771	120.409		740	348.417	77.436		740	301.872	61.216		740	339.551	176.398		740	121.901	46.96		740	93.975	94.599		740	71.811	140.827		740	185.29	63.722		740	48.317	253.743		740	207.454
741	120.128	98.417		741	233.608	61.88		741	276.606	49.176		741	255.771	119.984		741	348.417	80.564		741	301.872	61.662		741	339.551	178.175		741	121.901	47.993		741	93.975	98.443		741	71.811	141.272		741	185.29	63.261		741	48.317	244.807		741	207.454
742	120.128	106.041		742	233.608	62.044		742	276.606	48.862		742	255.771	126.258		742	348.417	76.786		742	301.872	61.286		742	339.551	184.443		742	121.901	47.407		742	93.975	98.09		742	71.811	143.679		742	185.29	65.438		742	48.317	237.633		742	207.454
743	120.128	107.524		743	233.608	60.296		743	276.606	49.152		743	255.771	123.042		743	348.417	77.541		743	301.872	61.746		743	339.551	181.469		743	121.901	45.24		743	93.975	95.321		743	71.811	142.296		743	185.29	63.995		743	48.317	233.156		743	207.454
744	120.128	109.483		744	233.608	59.987		744	276.606	50		744	255.771	120.4		744	348.417	76.885		744	301.872	61.156		744	339.551	179.407		744	121.901	45.236		744	93.975	98.354		744	71.811	144.167		744	185.29	62.373		744	48.317	230.679		744	207.454
745	120.128	107.196		745	233.608	59.888		745	276.606	49.614		745	255.771	124.565		745	348.417	77.953		745	301.872	60.433		745	339.551	181.557		745	121.901	47.476		745	93.975	96.953		745	71.811	140.457		745	185.29	63.847		745	48.317	230.963		745	207.454
746	120.128	103.31		746	233.608	60.455		746	276.606	48.731		746	255.771	127.184		746	348.417	78.031		746	301.872	60.828		746	339.551	180.601		746	121.901	45.855		746	93.975	97.42		746	71.811	140.16		746	185.29	59.177		746	48.317	234.468		746	207.454
747	120.128	110.48		747	233.608	59.975		747	276.606	49.441		747	255.771	126.849		747	348.417	77.629		747	301.872	61.204		747	339.551	179.375		747	121.901	44.356		747	93.975	95.434		747	71.811	138.549		747	185.29	61.72		747	48.317	235.899		747	207.454
748	120.128	104.31		748	233.608	58.216		748	276.606	47.242		748	255.771	126.688		748	348.417	79.58		748	301.872	61.83		748	339.551	182.817		748	121.901	44.836		748	93.975	103.274		748	71.811	142.414		748	185.29	63.007		748	48.317	239.596		748	207.454
749	120.128	95.513		749	233.608	57.45		749	276.606	48.095		749	255.771	128.634		749	348.417	79.107		749	301.872	61.455		749	339.551	179.38		749	121.901	44.727		749	93.975	98.241		749	71.811	146.043		749	185.29	62.648		749	48.317	227.202		749	207.454
750	120.128	99.756		750	233.608	60.791		750	276.606	48.226		750	255.771	126.284		750	348.417	80.441		750	301.872	61.352		750	339.551	182.074		750	121.901	48.905		750	93.975	97.934		750	71.811	138.469		750	185.29	62.079		750	48.317	221.881		750	207.454
751	120.128	105.749		751	233.608	59.298		751	276.606	49.788		751	255.771	121.872		751	348.417	77.774		751	301.872	61.275		751	339.551	179.859		751	121.901	45.313		751	93.975	96.142		751	71.811	142.679		751	185.29	63.038		751	48.317	241.404		751	207.454
752	120.128	98.162		752	233.608	58.81		752	276.606	50.561		752	255.771	126.137		752	348.417	77.433		752	301.872	62.584		752	339.551	179.554		752	121.901	48.102		752	93.975	103.495		752	71.811	139.08		752	185.29	63.041		752	48.317	235.477		752	207.454
753	120.128	99.908		753	233.608	56.493		753	276.606	50.439		753	255.771	124.182		753	348.417	80.017		753	301.872	62.621		753	339.551	178.43		753	121.901	47.305		753	93.975	101.156		753	71.811	135.84		753	185.29	61.852		753	48.317	236.688		753	207.454
754	120.128	102.491		754	233.608	57.814		754	276.606	49.433		754	255.771	126.293		754	348.417	77.725		754	301.872	59.847		754	339.551	176.462		754	121.901	45.167		754	93.975	101.005		754	71.811	143.259		754	185.29	62.299		754	48.317	237.908		754	207.454
755	120.128	105.528		755	233.608	56.427		755	276.606	48.761		755	255.771	122.903		755	348.417	79.907		755	301.872	59.821		755	339.551	175.204		755	121.901	45.389		755	93.975	96.292		755	71.811	135.525		755	185.29	61.335		755	48.317	236.257		755	207.454
756	120.128	116.657		756	233.608	53.791		756	276.606	49.651		756	255.771	121.305		756	348.417	79.351		756	301.872	62.843		756	339.551	175.735		756	121.901	43.822		756	93.975	96.245		756	71.811	141.802		756	185.29	63.036		756	48.317	240.954		756	207.454
757	120.128	107.107		757	233.608	52.112		757	276.606	48.55		757	255.771	124.416		757	348.417	77.697		757	301.872	60.885		757	339.551	178.04		757	121.901	45.782		757	93.975	99.297		757	71.811	139.21		757	185.29	64.309		757	48.317	234.092		757	207.454
758	120.128	104.247		758	233.608	53.685		758	276.606	48.936		758	255.771	121.813		758	348.417	78.464		758	301.872	62.063		758	339.551	177.415		758	121.901	45.64		758	93.975	96.406		758	71.811	136.031		758	185.29	60.933		758	48.317	234.156		758	207.454
759	120.128	92.638		759	233.608	53.873		759	276.606	49.237		759	255.771	124.338		759	348.417	79.943		759	301.872	61.674		759	339.551	177.509		759	121.901	45.924		759	93.975	102.321		759	71.811	140.296		759	185.29	63.926		759	48.317	248.817		759	207.454
760	120.128	95.875		760	233.608	52.964		760	276.606	47.816		760	255.771	124.73		760	348.417	78.455		760	301.872	61.609		760	339.551	175.345		760	121.901	45.451		760	93.975	102.283		760	71.811	137.333		760	185.29	59.797		760	48.317	243.284		760	207.454
761	120.128	102.476		761	233.608	55.573		761	276.606	48.349		761	255.771	119.511		761	348.417	79.352		761	301.872	60.739		761	339.551	182.161		761	121.901	44.818		761	93.975	99.08		761	71.811	136.901		761	185.29	58.359		761	48.317	242.413		761	207.454
762	120.128	103.376		762	233.608	58.516		762	276.606	45.713		762	255.771	121.127		762	348.417	77.29		762	301.872	64.157		762	339.551	180.102		762	121.901	45.495		762	93.975	103.561		762	71.811	140.957		762	185.29	57.634		762	48.317	241.413		762	207.454
763	120.128	100.613		763	233.608	66.245		763	276.606	46.136		763	255.771	117.872		763	348.417	77.552		763	301.872	61.018		763	339.551	181.243		763	121.901	45.302		763	93.975	99.142		763	71.811	147.259		763	185.29	59.957		763	48.317	244.716		763	207.454
764	120.128	106.97		764	233.608	73.08		764	276.606	47.724		764	255.771	123.371		764	348.417	77.564		764	301.872	62.511		764	339.551	184.317		764	121.901	46.909		764	93.975	101.901		764	71.811	140.778		764	185.29	59.141		764	48.317	245.018		764	207.454
765	120.128	104.022		765	233.608	74.491		765	276.606	46.611		765	255.771	122.125		765	348.417	78.181		765	301.872	60.068		765	339.551	183.518		765	121.901	44.716		765	93.975	103.5		765	71.811	137.383		765	185.29	56.818		765	48.317	241.642		765	207.454
766	120.128	105.321		766	233.608	72.681		766	276.606	47.686		766	255.771	121.002		766	348.417	78.824		766	301.872	60.822		766	339.551	187.53		766	121.901	46.495		766	93.975	99.047		766	71.811	143.827		766	185.29	59.211		766	48.317	238.633		766	207.454
767	120.128	99.72		767	233.608	72.398		767	276.606	48.856		767	255.771	122.794		767	348.417	77.964		767	301.872	61.841		767	339.551	186.905		767	121.901	46.164		767	93.975	102.943		767	71.811	139.759		767	185.29	61.667		767	48.317	255.101		767	207.454
768	120.128	106.668		768	233.608	75.142		768	276.606	47.099		768	255.771	119.745		768	348.417	79.136		768	301.872	60.288		768	339.551	187.102		768	121.901	45.229		768	93.975	103.047		768	71.811	137.407		768	185.29	59.002		768	48.317	245.147		768	207.454
769	120.128	107.768		769	233.608	75.034		769	276.606	47.694		769	255.771	116.75		769	348.417	77.892		769	301.872	60.935		769	339.551	187.275		769	121.901	45.356		769	93.975	99.675		769	71.811	142.21		769	185.29	61.603		769	48.317	243.018		769	207.454
770	120.128	103.856		770	233.608	74.478		770	276.606	47.261		770	255.771	116.461		770	348.417	76.566		770	301.872	61.988		770	339.551	183.65		770	121.901	44.069		770	93.975	105.566		770	71.811	135.216		770	185.29	59.036		770	48.317	231.431		770	207.454
771	120.128	105.077		771	233.608	72.545		771	276.606	47.013		771	255.771	116.291		771	348.417	78.121		771	301.872	59.959		771	339.551	182.601		771	121.901	44.804		771	93.975	99.547		771	71.811	145.414		771	185.29	60.148		771	48.317	243.523		771	207.454
772	120.128	109.435		772	233.608	71.548		772	276.606	45.699		772	255.771	113.847		772	348.417	76.935		772	301.872	60.581		772	339.551	182.423		772	121.901	45.742		772	93.975	101.774		772	71.811	139.056		772	185.29	57.51		772	48.317	228.605		772	207.454
773	120.128	104.801		773	233.608	73.6		773	276.606	47.042		773	255.771	113.846		773	348.417	78.933		773	301.872	62.543		773	339.551	182.672		773	121.901	44.876		773	93.975	104.637		773	71.811	141.284		773	185.29	60.062		773	48.317	243.89		773	207.454
774	120.128	107.97		774	233.608	74.691		774	276.606	46.47		774	255.771	114.023		774	348.417	79.263		774	301.872	58.576		774	339.551	185.582		774	121.901	45.964		774	93.975	100.448		774	71.811	142.747		774	185.29	57.089		774	48.317	240.706		774	207.454
775	120.128	106.613		775	233.608	73.917		775	276.606	47.779		775	255.771	114.563		775	348.417	80.061		775	301.872	59.749		775	339.551	182.674		775	121.901	43.644		775	93.975	100.642		775	71.811	141.037		775	185.29	59.77		775	48.317	227.44		775	207.454
776	120.128	102.303		776	233.608	73.603		776	276.606	46.625		776	255.771	113.841		776	348.417	78.556		776	301.872	59.953		776	339.551	185.45		776	121.901	47.149		776	93.975	105.505		776	71.811	147.105		776	185.29	60.234		776	48.317	238.165		776	207.454
777	120.128	102.509		777	233.608	72.499		777	276.606	45.861		777	255.771	111.659		777	348.417	77.01		777	301.872	59.703		777	339.551	192.585		777	121.901	46.036		777	93.975	103.127		777	71.811	146.716		777	185.29	58.586		777	48.317	232.44		777	207.454
778	120.128	103.111		778	233.608	70.598		778	276.606	44.178		778	255.771	112.449		778	348.417	76.476		778	301.872	59.689		778	339.551	185.557		778	121.901	47.462		778	93.975	101.269		778	71.811	143.315		778	185.29	58.766		778	48.317	228.752		778	207.454
779	120.128	106.982		779	233.608	70.446		779	276.606	46.139		779	255.771	114.83		779	348.417	78.659		779	301.872	61.53		779	339.551	182.868		779	121.901	46.2		779	93.975	100.156		779	71.811	138.574		779	185.29	59.349		779	48.317	230.807		779	207.454
780	120.128	107.565		780	233.608	70.343		780	276.606	44.812		780	255.771	114.007		780	348.417	77.958		780	301.872	62.871		780	339.551	182.448		780	121.901	46.476		780	93.975	100.151		780	71.811	147.451		780	185.29	59.993		780	48.317	245.009		780	207.454
781	120.128	102.376		781	233.608	72.499		781	276.606	43.595		781	255.771	111.757		781	348.417	76.56		781	301.872	62.473		781	339.551	191.847		781	121.901	45.898		781	93.975	96.934		781	71.811	149.92		781	185.29	63.467		781	48.317	244.11		781	207.454
782	120.128	105.72		782	233.608	68.539		782	276.606	44.665		782	255.771	114.312		782	348.417	77.898		782	301.872	60.424		782	339.551	185.913		782	121.901	43.978		782	93.975	95.033		782	71.811	143.198		782	185.29	60.124		782	48.317	248.771		782	207.454
783	120.128	103.513		783	233.608	68.962		783	276.606	43.053		783	255.771	113.284		783	348.417	76.252		783	301.872	59.238		783	339.551	184.426		783	121.901	44.778		783	93.975	96.241		783	71.811	146.488		783	185.29	59.376		783	48.317	241.716		783	207.454
784	120.128	105.295		784	233.608	71.157		784	276.606	43.889		784	255.771	112.236		784	348.417	79.777		784	301.872	60.451		784	339.551	187.956		784	121.901	48.505		784	93.975	96.448		784	71.811	143.451		784	185.29	58.187		784	48.317	227.33		784	207.454
785	120.128	104.974		785	233.608	67.765		785	276.606	42.869		785	255.771	112.452		785	348.417	79.209		785	301.872	58.95		785	339.551	185.248		785	121.901	42.571		785	93.975	94.42		785	71.811	136.494		785	185.29	57.249		785	48.317	241.303		785	207.454
786	120.128	102.561		786	233.608	68.858		786	276.606	42.534		786	255.771	112.036		786	348.417	78.617		786	301.872	62.407		786	339.551	184.243		786	121.901	45.622		786	93.975	98.208		786	71.811	142.846		786	185.29	58.902		786	48.317	233.064		786	207.454
787	120.128	100.882		787	233.608	69.518		787	276.606	43.377		787	255.771	113.307		787	348.417	79.533		787	301.872	59.554		787	339.551	185.007		787	121.901	45.753		787	93.975	95.708		787	71.811	144.84		787	185.29	60.481		787	48.317	230.083		787	207.454
788	120.128	100.594		788	233.608	67.647		788	276.606	44.296		788	255.771	112.856		788	348.417	79.136		788	301.872	61.363		788	339.551	180.479		788	121.901	48.16		788	93.975	95.325		788	71.811	150.87		788	185.29	57.211		788	48.317	222.275		788	207.454
789	120.128	102.911		789	233.608	67.307		789	276.606	45.439		789	255.771	111.998		789	348.417	77.545		789	301.872	58.968		789	339.551	168.003		789	121.901	46.302		789	93.975	94.825		789	71.811	140.722		789	185.29	58.892		789	48.317	224.972		789	207.454
790	120.128	104.889		790	233.608	64.491		790	276.606	44.345		790	255.771	114.964		790	348.417	77.129		790	301.872	60.971		790	339.551	176.388		790	121.901	47.564		790	93.975	94.58		790	71.811	143.698		790	185.29	57.663		790	48.317	239.202		790	207.454
791	120.128	109.557		791	233.608	65.655		791	276.606	43.731		791	255.771	113.617		791	348.417	78.272		791	301.872	60.96		791	339.551	170.901		791	121.901	46.098		791	93.975	98.646		791	71.811	145.988		791	185.29	63.014		791	48.317	234.229		791	207.454
792	120.128	104.701		792	233.608	66.592		792	276.606	44.449		792	255.771	112.759		792	348.417	78.211		792	301.872	62.54		792	339.551	177.834		792	121.901	45.389		792	93.975	95.245		792	71.811	141.901		792	185.29	63.368		792	48.317	225.119		792	207.454
793	120.128	106.768		793	233.608	64.85		793	276.606	44.5		793	255.771	111.596		793	348.417	78.2		793	301.872	61.451		793	339.551	175.709		793	121.901	44.269		793	93.975	94.745		793	71.811	148.056		793	185.29	60.89		793	48.317	231.395		793	207.454
794	120.128	105.251		794	233.608	65.844		794	276.606	43.633		794	255.771	110.402		794	348.417	79.934		794	301.872	61.194		794	339.551	173.787		794	121.901	45.505		794	93.975	91.142		794	71.811	155.66		794	185.29	65.318		794	48.317	217.321		794	207.454
795	120.128	107.609		795	233.608	66.814		795	276.606	44.205		795	255.771	115.36		795	348.417	77.347		795	301.872	61.288		795	339.551	178.898		795	121.901	44.233		795	93.975	93.113		795	71.811	146.463		795	185.29	62.361		795	48.317	237.202		795	207.454
796	120.128	104.889		796	233.608	67.66		796	276.606	44.59		796	255.771	111.362		796	348.417	78.316		796	301.872	63.093		796	339.551	175.732		796	121.901	45.291		796	93.975	93.425		796	71.811	139.593		796	185.29	68.572		796	48.317	227.505		796	207.454
797	120.128	99.546		797	233.608	68.127		797	276.606	44.143		797	255.771	112.986		797	348.417	77.687		797	301.872	59.693		797	339.551	177.642		797	121.901	46.4		797	93.975	91.467		797	71.811	143.111		797	185.29	67.359		797	48.317	220.651		797	207.454
798	120.128	104.812		798	233.608	70.746		798	276.606	42.755		798	255.771	110.213		798	348.417	78.225		798	301.872	61.197		798	339.551	178.185		798	121.901	45.629		798	93.975	90.651		798	71.811	140.994		798	185.29	65.584		798	48.317	216.211		798	207.454
799	120.128	99.554		799	233.608	68.522		799	276.606	43.721		799	255.771	111.34		799	348.417	77.239		799	301.872	62.242		799	339.551	174.672		799	121.901	46.807		799	93.975	90.066		799	71.811	146.401		799	185.29	68.718		799	48.317	230.477		799	207.454
800	120.128	104.554		800	233.608	70.681		800	276.606	43.942		800	255.771	109.059		800	348.417	77.449		800	301.872	59.307		800	339.551	172.843		800	121.901	44.338		800	93.975	93.198		800	71.811	147.031		800	185.29	63.699		800	48.317	232.725		800	207.454
801	120.128	104.077		801	233.608	69.879		801	276.606	44.082		801	255.771	112.282		801	348.417	78.125		801	301.872	61.703		801	339.551	170.905		801	121.901	46.742		801	93.975	93.373		801	71.811	147.648		801	185.29	65.522		801	48.317	214.899		801	207.454
802	120.128	104.011		802	233.608	74.366		802	276.606	44.319		802	255.771	109.293		802	348.417	77.794		802	301.872	57.887		802	339.551	172.869		802	121.901	42.695		802	93.975	91.726		802	71.811	144.13		802	185.29	63.888		802	48.317	217.679		802	207.454
803	120.128	105.354		803	233.608	72.334		803	276.606	44.088		803	255.771	109.716		803	348.417	77.487		803	301.872	61.101		803	339.551	169.624		803	121.901	45.436		803	93.975	88.623		803	71.811	143.506		803	185.29	63.438		803	48.317	236.284		803	207.454
804	120.128	110.753		804	233.608	73.281		804	276.606	43.877		804	255.771	108.549		804	348.417	77.552		804	301.872	60.878		804	339.551	173.026		804	121.901	46.458		804	93.975	88.873		804	71.811	147.302		804	185.29	63.433		804	48.317	234.083		804	207.454
805	120.128	105.432		805	233.608	73.97		805	276.606	46.224		805	255.771	109.61		805	348.417	80.263		805	301.872	60.004		805	339.551	166.764		805	121.901	46.415		805	93.975	89.769		805	71.811	140.278		805	185.29	60.801		805	48.317	221.697		805	207.454
806	120.128	106.705		806	233.608	74.609		806	276.606	43.857		806	255.771	106.248		806	348.417	79.126		806	301.872	60.49		806	339.551	173.383		806	121.901	45.447		806	93.975	88.939		806	71.811	144.08		806	185.29	63.488		806	48.317	220.899		806	207.454
807	120.128	97.753		807	233.608	73.241		807	276.606	45.511		807	255.771	106.787		807	348.417	77.676		807	301.872	60.711		807	339.551	172.595		807	121.901	45.593		807	93.975	88.259		807	71.811	143.457		807	185.29	61.356		807	48.317	223.963		807	207.454
808	120.128	101.041		808	233.608	75.545		808	276.606	45.08		808	255.771	107.548		808	348.417	76.658		808	301.872	59.228		808	339.551	179.273		808	121.901	47.113		808	93.975	92.278		808	71.811	153.907		808	185.29	62.495		808	48.317	226.743		808	207.454
809	120.128	99.055		809	233.608	71.713		809	276.606	43.78		809	255.771	107.288		809	348.417	79.835		809	301.872	59.743		809	339.551	175.836		809	121.901	44.52		809	93.975	90.274		809	71.811	149.086		809	185.29	58.538		809	48.317	210.44		809	207.454
810	120.128	99.745		810	233.608	75.376		810	276.606	45.694		810	255.771	104.827		810	348.417	78.483		810	301.872	60.953		810	339.551	170.71		810	121.901	45.913		810	93.975	86.514		810	71.811	151.08		810	185.29	63.278		810	48.317	207.174		810	207.454
811	120.128	102.9		811	233.608	75.51		811	276.606	44.423		811	255.771	107.934		811	348.417	77.615		811	301.872	60.05		811	339.551	171.114		811	121.901	45.356		811	93.975	88.047		811	71.811	145.154		811	185.29	62.301		811	48.317	208.395		811	207.454
812	120.128	101.915		812	233.608	75.224		812	276.606	43.853		812	255.771	107.385		812	348.417	77.71		812	301.872	61.388		812	339.551	169.948		812	121.901	45.331		812	93.975	85.156		812	71.811	151.759		812	185.29	60.675		812	48.317	216.376		812	207.454
813	120.128	104.661		813	233.608	77.294		813	276.606	45.641		813	255.771	107.75		813	348.417	75.822		813	301.872	61.978		813	339.551	167.973		813	121.901	44.509		813	93.975	85.057		813	71.811	146.611		813	185.29	59.766		813	48.317	205.183		813	207.454
814	120.128	103.118		814	233.608	81.355		814	276.606	42.615		814	255.771	111.589		814	348.417	78.692		814	301.872	62.777		814	339.551	166.136		814	121.901	43.138		814	93.975	88.085		814	71.811	149.074		814	185.29	63.242		814	48.317	210.532		814	207.454
815	120.128	105.812		815	233.608	82.465		815	276.606	44.801		815	255.771	110.925		815	348.417	78.127		815	301.872	62.637		815	339.551	163.633		815	121.901	41.975		815	93.975	88.929		815	71.811	150.136		815	185.29	59.56		815	48.317	224.817		815	207.454
816	120.128	104.465		816	233.608	82.975		816	276.606	45.929		816	255.771	109.251		816	348.417	79.561		816	301.872	61.327		816	339.551	159.659		816	121.901	43.709		816	93.975	94.325		816	71.811	148.556		816	185.29	59.215		816	48.317	212.303		816	207.454
817	120.128	105.487		817	233.608	82.85		817	276.606	44.385		817	255.771	107.802		817	348.417	77.933		817	301.872	60.775		817	339.551	153.574		817	121.901	44.884		817	93.975	92.165		817	71.811	148.556		817	185.29	59.885		817	48.317	209.422		817	207.454
818	120.128	107.768		818	233.608	85.803		818	276.606	44.744		818	255.771	104.929		818	348.417	79.341		818	301.872	62.264		818	339.551	152.369		818	121.901	43.211		818	93.975	88.014		818	71.811	137.16		818	185.29	57.112		818	48.317	210.963		818	207.454
819	120.128	105.963		819	233.608	85.647		819	276.606	46.08		819	255.771	105.61		819	348.417	75.635		819	301.872	63.291		819	339.551	146.099		819	121.901	46.284		819	93.975	92.212		819	71.811	141.136		819	185.29	58.847		819	48.317	215.073		819	207.454
820	120.128	100.424		820	233.608	85.524		820	276.606	44.545		820	255.771	108.359		820	348.417	80.398		820	301.872	61.637		820	339.551	150.537		820	121.901	41.844		820	93.975	93.788		820	71.811	143.13		820	185.29	60.555		820	48.317	204.266		820	207.454
821	120.128	101.513		821	233.608	83.973		821	276.606	43.928		821	255.771	108.378		821	348.417	77.961		821	301.872	61.529		821	339.551	147.388		821	121.901	46.971		821	93.975	93		821	71.811	145.037		821	185.29	59.828		821	48.317	201.706		821	207.454
822	120.128	97.686		822	233.608	81.042		822	276.606	46.098		822	255.771	103.688		822	348.417	78.407		822	301.872	64.539		822	339.551	146.069		822	121.901	46.033		822	93.975	90.906		822	71.811	144.34		822	185.29	57.151		822	48.317	204.743		822	207.454
823	120.128	99.613		823	233.608	83.689		823	276.606	43.603		823	255.771	110.175		823	348.417	78.562		823	301.872	63.518		823	339.551	148.012		823	121.901	42.975		823	93.975	94.486		823	71.811	141.407		823	185.29	61.187		823	48.317	207.413		823	207.454
824	120.128	97.528		824	233.608	83.558		824	276.606	42.867		824	255.771	109.284		824	348.417	77.318		824	301.872	62.819		824	339.551	142.796		824	121.901	45.295		824	93.975	93.948		824	71.811	143.302		824	185.29	60.699		824	48.317	211.982		824	207.454
825	120.128	99.801		825	233.608	85.235		825	276.606	44.002		825	255.771	107.409		825	348.417	78.234		825	301.872	63.173		825	339.551	141.86		825	121.901	47.229		825	93.975	89.764		825	71.811	141.932		825	185.29	59.641		825	48.317	204.89		825	207.454
826	120.128	95.362		826	233.608	87.4		826	276.606	43.74		826	255.771	108.412		826	348.417	79.785		826	301.872	62.241		826	339.551	139.196		826	121.901	45.189		826	93.975	92.311		826	71.811	146.278		826	185.29	62.648		826	48.317	213.046		826	207.454
827	120.128	105.668		827	233.608	86.07		827	276.606	44.659		827	255.771	107.184		827	348.417	79.391		827	301.872	64.301		827	339.551	141.462		827	121.901	45.145		827	93.975	89.038		827	71.811	139.735		827	185.29	59.103		827	48.317	201.385		827	207.454
828	120.128	101.838		828	233.608	86.102		828	276.606	44.599		828	255.771	106.288		828	348.417	78.056		828	301.872	61.725		828	339.551	140.651		828	121.901	43.633		828	93.975	99.208		828	71.811	145.981		828	185.29	59.785		828	48.317	204.037		828	207.454
829	120.128	99.476		829	233.608	85.404		829	276.606	45.397		829	255.771	111.95		829	348.417	79.371		829	301.872	61.696		829	339.551	136.565		829	121.901	44.778		829	93.975	96.538		829	71.811	138.71		829	185.29	61.667		829	48.317	208.917		829	207.454
830	120.128	96.14		830	233.608	86.808		830	276.606	44.845		830	255.771	107.997		830	348.417	79.402		830	301.872	60.59		830	339.551	141.195		830	121.901	44.469		830	93.975	95.09		830	71.811	143.136		830	185.29	62.096		830	48.317	206.037		830	207.454
831	120.128	96.207		831	233.608	84.85		831	276.606	45.207		831	255.771	108.111		831	348.417	76.982		831	301.872	61.709		831	339.551	139.561		831	121.901	46.465		831	93.975	94.788		831	71.811	137.068		831	185.29	59.813		831	48.317	213.119		831	207.454
832	120.128	94.893		832	233.608	82.812		832	276.606	43.266		832	255.771	112.681		832	348.417	81.553		832	301.872	61.752		832	339.551	140.727		832	121.901	44.436		832	93.975	89.009		832	71.811	148.401		832	185.29	62.636		832	48.317	200.147		832	207.454
833	120.128	95.1		833	233.608	82.167		833	276.606	45.402		833	255.771	109.719		833	348.417	76.309		833	301.872	61.533		833	339.551	139.842		833	121.901	46.087		833	93.975	95.873		833	71.811	146.519		833	185.29	63.213		833	48.317	199.706		833	207.454
834	120.128	89.055		834	233.608	85.027		834	276.606	46.327		834	255.771	111.352		834	348.417	79.243		834	301.872	63.535		834	339.551	139.261		834	121.901	46.215		834	93.975	86.566		834	71.811	134.191		834	185.29	60.95		834	48.317	211.064		834	207.454
835	120.128	94.207		835	233.608	82.641		835	276.606	46.221		835	255.771	113.26		835	348.417	77.477		835	301.872	62.028		835	339.551	137.956		835	121.901	43.927		835	93.975	94.887		835	71.811	133.562		835	185.29	58.799		835	48.317	214.523		835	207.454
836	120.128	90.852		836	233.608	79.271		836	276.606	44.785		836	255.771	108.894		836	348.417	78.062		836	301.872	59.937		836	339.551	141.56		836	121.901	45.138		836	93.975	91.439		836	71.811	145.265		836	185.29	61.993		836	48.317	207.761		836	207.454
837	120.128	87.033		837	233.608	78.949		837	276.606	44.684		837	255.771	111.458		837	348.417	80.289		837	301.872	62.916		837	339.551	143.166		837	121.901	43.691		837	93.975	93.925		837	71.811	139.92		837	185.29	62.612		837	48.317	215.679		837	207.454
838	120.128	90.07		838	233.608	79.954		838	276.606	46.41		838	255.771	110.149		838	348.417	79.317		838	301.872	62.369		838	339.551	142.127		838	121.901	45.051		838	93.975	90.146		838	71.811	141.451		838	185.29	60.397		838	48.317	215.018		838	207.454
839	120.128	92.875		839	233.608	77.417		839	276.606	46.418		839	255.771	108.958		839	348.417	80.356		839	301.872	61.222		839	339.551	141.462		839	121.901	45.091		839	93.975	91.566		839	71.811	144.37		839	185.29	59.089		839	48.317	211.514		839	207.454
840	120.128	98.159		840	233.608	77.987		840	276.606	44.897		840	255.771	112.135		840	348.417	79.089		840	301.872	60.059		840	339.551	145.914		840	121.901	46.025		840	93.975	97.151		840	71.811	143.951		840	185.29	60.292		840	48.317	219.138		840	207.454
841	120.128	98.919		841	233.608	76.292		841	276.606	44.487		841	255.771	110.886		841	348.417	77.067		841	301.872	60.402		841	339.551	149.863		841	121.901	45.04		841	93.975	91.797		841	71.811	140.327		841	185.29	60.562		841	48.317	208.798		841	207.454
842	120.128	99.557		842	233.608	75.873		842	276.606	44.845		842	255.771	109.307		842	348.417	77.719		842	301.872	59.956		842	339.551	152.138		842	121.901	45.065		842	93.975	89.019		842	71.811	144.148		842	185.29	61.364		842	48.317	216.743		842	207.454
843	120.128	95.343		843	233.608	76.668		843	276.606	44.808		843	255.771	111.816		843	348.417	78.028		843	301.872	59.2		843	339.551	154.05		843	121.901	45.538		843	93.975	91.873		843	71.811	139.895		843	185.29	59.995		843	48.317	215.578		843	207.454
844	120.128	101.336		844	233.608	77.385		844	276.606	45.566		844	255.771	117.839		844	348.417	79.737		844	301.872	61.79		844	339.551	150.706		844	121.901	45.6		844	93.975	93.203		844	71.811	131.525		844	185.29	60.785		844	48.317	220.367		844	207.454
845	120.128	98.919		845	233.608	74.207		845	276.606	44.657		845	255.771	118.009		845	348.417	80.177		845	301.872	61.034		845	339.551	150.612		845	121.901	46.007		845	93.975	89.458		845	71.811	136.148		845	185.29	62.294		845	48.317	216.376		845	207.454
846	120.128	91.989		846	233.608	75.791		846	276.606	44.333		846	255.771	114.995		846	348.417	76.917		846	301.872	60.04		846	339.551	152.837		846	121.901	46.505		846	93.975	92.16		846	71.811	138.012		846	185.29	60.299		846	48.317	222.853		846	207.454
847	120.128	94.45		847	233.608	73.366		847	276.606	46.224		847	255.771	112.946		847	348.417	79.522		847	301.872	60.489		847	339.551	147.943		847	121.901	46.062		847	93.975	89.708		847	71.811	140.722		847	185.29	61.153		847	48.317	205.459		847	207.454
848	120.128	96.491		848	233.608	73.935		848	276.606	44.433		848	255.771	108.549		848	348.417	78.476		848	301.872	61.576		848	339.551	146.512		848	121.901	46.415		848	93.975	95.689		848	71.811	141.006		848	185.29	60.194		848	48.317	208.505		848	207.454
849	120.128	95.697		849	233.608	74.116		849	276.606	44.676		849	255.771	113.466		849	348.417	79.327		849	301.872	61.295		849	339.551	144.499		849	121.901	47.945		849	93.975	88.882		849	71.811	136.42		849	185.29	62.718		849	48.317	199.404		849	207.454
850	120.128	94.945		850	233.608	75.679		850	276.606	43.144		850	255.771	108.319		850	348.417	80.298		850	301.872	60.379		850	339.551	144.996		850	121.901	44.731		850	93.975	92.377		850	71.811	138.716		850	185.29	60.943		850	48.317	206.229		850	207.454
851	120.128	94.9		851	233.608	75.176		851	276.606	43.947		851	255.771	109.028		851	348.417	79.723		851	301.872	61.341		851	339.551	139.484		851	121.901	43.007		851	93.975	87.245		851	71.811	134.037		851	185.29	58.55		851	48.317	202.945		851	207.454
852	120.128	101.28		852	233.608	75.099		852	276.606	43.732		852	255.771	110.825		852	348.417	79.188		852	301.872	59.994		852	339.551	138.013		852	121.901	47.702		852	93.975	95.047		852	71.811	135.42		852	185.29	62.471		852	48.317	207.101		852	207.454
853	120.128	100.509		853	233.608	74.298		853	276.606	42.771		853	255.771	112.598		853	348.417	77.949		853	301.872	59.815		853	339.551	139.411		853	121.901	44.051		853	93.975	93.481		853	71.811	126.494		853	185.29	57.677		853	48.317	210.358		853	207.454
854	120.128	101.646		854	233.608	76.14		854	276.606	42.595		854	255.771	113.471		854	348.417	79.117		854	301.872	58.407		854	339.551	134.426		854	121.901	46.076		854	93.975	96		854	71.811	141.265		854	185.29	58.84		854	48.317	211.284		854	207.454
855	120.128	101.284		855	233.608	75.397		855	276.606	41.869		855	255.771	110.371		855	348.417	79.032		855	301.872	59.075		855	339.551	137.441		855	121.901	45.309		855	93.975	91.585		855	71.811	132.432		855	185.29	62.835		855	48.317	205.083		855	207.454
856	120.128	101.162		856	233.608	74.047		856	276.606	43.067		856	255.771	112.4		856	348.417	76.364		856	301.872	60.379		856	339.551	133.266		856	121.901	46.564		856	93.975	93.009		856	71.811	137.815		856	185.29	59.644		856	48.317	212.615		856	207.454
857	120.128	103.24		857	233.608	74.972		857	276.606	41.888		857	255.771	110.964		857	348.417	80.453		857	301.872	58.902		857	339.551	133.821		857	121.901	48.815		857	93.975	96.274		857	71.811	138.969		857	185.29	57.371		857	48.317	204.073		857	207.454
858	120.128	109.376		858	233.608	70.839		858	276.606	42.774		858	255.771	110.823		858	348.417	78.406		858	301.872	59.906		858	339.551	136.792		858	121.901	44.164		858	93.975	91.901		858	71.811	135.815		858	185.29	56.105		858	48.317	209.303		858	207.454
859	120.128	111.17		859	233.608	72.18		859	276.606	45.05		859	255.771	111.248		859	348.417	76.594		859	301.872	59.868		859	339.551	132.063		859	121.901	45.138		859	93.975	89.5		859	71.811	136.66		859	185.29	59.608		859	48.317	206.257		859	207.454
860	120.128	117.782		860	233.608	72.099		860	276.606	45.755		860	255.771	108.627		860	348.417	77.592		860	301.872	58.99		860	339.551	132.899		860	121.901	48.633		860	93.975	91.849		860	71.811	134.735		860	185.29	59.517		860	48.317	212.505		860	207.454
861	120.128	121.432		861	233.608	74.882		861	276.606	44.521		861	255.771	110.794		861	348.417	79.342		861	301.872	59.558		861	339.551	128.995		861	121.901	45.531		861	93.975	89.712		861	71.811	134.086		861	185.29	58.555		861	48.317	213.761		861	207.454
862	120.128	118.97		862	233.608	69.233		862	276.606	44.952		862	255.771	112.307		862	348.417	79.447		862	301.872	58.736		862	339.551	127.884		862	121.901	43.618		862	93.975	92.509		862	71.811	134.704		862	185.29	56.904		862	48.317	217.193		862	207.454
863	120.128	111.203		863	233.608	68.856		863	276.606	45.883		863	255.771	110.095		863	348.417	78.319		863	301.872	59.966		863	339.551	126.728		863	121.901	43.367		863	93.975	91.656		863	71.811	131.265		863	185.29	61.976		863	48.317	206.413		863	207.454
864	120.128	113.314		864	233.608	69.019		864	276.606	45.01		864	255.771	111.464		864	348.417	78.134		864	301.872	57.667		864	339.551	115.166		864	121.901	45.767		864	93.975	90.854		864	71.811	136.389		864	185.29	58.411		864	48.317	217.605		864	207.454
865	120.128	114.122		865	233.608	70.19		865	276.606	44.596		865	255.771	112.159		865	348.417	78.055		865	301.872	56.402		865	339.551	118.158		865	121.901	44.335		865	93.975	88.797		865	71.811	132.025		865	185.29	59.691		865	48.317	225.954		865	207.454
866	120.128	109.166		866	233.608	67.82		866	276.606	45.572		866	255.771	110.244		866	348.417	77.696		866	301.872	59.947		866	339.551	115.099		866	121.901	43.705		866	93.975	91.722		866	71.811	137.963		866	185.29	58.55		866	48.317	215.009		866	207.454
867	120.128	106.295		867	233.608	67.774		867	276.606	46.123		867	255.771	111.007		867	348.417	79.284		867	301.872	57.718		867	339.551	117.441		867	121.901	43.927		867	93.975	89.25		867	71.811	132.562		867	185.29	55.184		867	48.317	204.101		867	207.454
868	120.128	115.476		868	233.608	65.34		868	276.606	45.986		868	255.771	110.295		868	348.417	78.349		868	301.872	58.01		868	339.551	114.973		868	121.901	44.545		868	93.975	88.689		868	71.811	137.315		868	185.29	57.962		868	48.317	227.138		868	207.454
869	120.128	117.635		869	233.608	65.529		869	276.606	44.732		869	255.771	113.367		869	348.417	78.328		869	301.872	58.123		869	339.551	116.185		869	121.901	43.985		869	93.975	89.292		869	71.811	133.852		869	185.29	57.722		869	48.317	209.459		869	207.454
870	120.128	116.461		870	233.608	63.569		870	276.606	44.801		870	255.771	113.66		870	348.417	77.459		870	301.872	61.784		870	339.551	117.324		870	121.901	45.622		870	93.975	92.887		870	71.811	132.364		870	185.29	57.098		870	48.317	213.294		870	207.454
871	120.128	113.546		871	233.608	64.059		871	276.606	43.795		871	255.771	109.979		871	348.417	79.249		871	301.872	61.27		871	339.551	115.497		871	121.901	45.393		871	93.975	88.024		871	71.811	136.228		871	185.29	55.713		871	48.317	210.018		871	207.454
872	120.128	116.576		872	233.608	63.983		872	276.606	44.212		872	255.771	114.473		872	348.417	78.271		872	301.872	60.399		872	339.551	115.621		872	121.901	44.665		872	93.975	89.179		872	71.811	135.216		872	185.29	57.39		872	48.317	218.284		872	207.454
873	120.128	111.727		873	233.608	65.095		873	276.606	43.511		873	255.771	109.976		873	348.417	78.265		873	301.872	58.313		873	339.551	118.168		873	121.901	44.353		873	93.975	83.623		873	71.811	134.012		873	185.29	57.433		873	48.317	207.431		873	207.454
874	120.128	116.731		874	233.608	62.565		874	276.606	43.748		874	255.771	107.504		874	348.417	77.033		874	301.872	58.677		874	339.551	115.96		874	121.901	44.825		874	93.975	86.019		874	71.811	140.34		874	185.29	53.565		874	48.317	205.881		874	207.454
875	120.128	121.801		875	233.608	63.342		875	276.606	43.883		875	255.771	106.007		875	348.417	79.852		875	301.872	57.736		875	339.551	116.975		875	121.901	45.244		875	93.975	87.778		875	71.811	129.883		875	185.29	54.813		875	48.317	212.908		875	207.454
876	120.128	116.993		876	233.608	62.326		876	276.606	43.897		876	255.771	107.951		876	348.417	76.006		876	301.872	59.512		876	339.551	120.413		876	121.901	43.956		876	93.975	89.788		876	71.811	125.716		876	185.29	53.603		876	48.317	226.248		876	207.454
877	120.128	116.911		877	233.608	61.535		877	276.606	43.979		877	255.771	106.653		877	348.417	78.491		877	301.872	60.539		877	339.551	120.273		877	121.901	43.313		877	93.975	88.292		877	71.811	139.401		877	185.29	54.871		877	48.317	220.358		877	207.454
878	120.128	111.649		878	233.608	62.063		878	276.606	43.798		878	255.771	107.7		878	348.417	79.053		878	301.872	58.095		878	339.551	120.381		878	121.901	44.276		878	93.975	88.943		878	71.811	134.716		878	185.29	55.658		878	48.317	222.697		878	207.454
879	120.128	116.554		879	233.608	62.444		879	276.606	41.702		879	255.771	107.726		879	348.417	76.581		879	301.872	61.001		879	339.551	119.717		879	121.901	43.367		879	93.975	85.792		879	71.811	137.148		879	185.29	54.715		879	48.317	221.413		879	207.454
880	120.128	120.856		880	233.608	59.059		880	276.606	43.893		880	255.771	108.14		880	348.417	79.739		880	301.872	59.394		880	339.551	115.187		880	121.901	43.28		880	93.975	88.363		880	71.811	135.802		880	185.29	55.923		880	48.317	219.67		880	207.454
881	120.128	111.236		881	233.608	56.55		881	276.606	44.417		881	255.771	107.217		881	348.417	78.085		881	301.872	58.043		881	339.551	109.744		881	121.901	45.331		881	93.975	89.387		881	71.811	131.426		881	185.29	54.653		881	48.317	217.789		881	207.454
882	120.128	114.258		882	233.608	56.717		882	276.606	43.58		882	255.771	104.149		882	348.417	80.16		882	301.872	59.354		882	339.551	112.757		882	121.901	43.222		882	93.975	87.745		882	71.811	134.451		882	185.29	57.751		882	48.317	223.697		882	207.454
883	120.128	121.509		883	233.608	53.753		883	276.606	43.647		883	255.771	108.688		883	348.417	78.144		883	301.872	57.922		883	339.551	111.745		883	121.901	43.269		883	93.975	90.637		883	71.811	136.346		883	185.29	54.23		883	48.317	227.633		883	207.454
884	120.128	115.683		884	233.608	54.843		884	276.606	43.734		884	255.771	107.163		884	348.417	77.939		884	301.872	60.492		884	339.551	108.83		884	121.901	44.025		884	93.975	89.783		884	71.811	132.333		884	185.29	55.242		884	48.317	219.431		884	207.454
885	120.128	113.151		885	233.608	53.114		885	276.606	42.973		885	255.771	109.82		885	348.417	78.663		885	301.872	57.718		885	339.551	112.779		885	121.901	44.36		885	93.975	86.769		885	71.811	133.426		885	185.29	58.057		885	48.317	228.78		885	207.454
886	120.128	115.244		886	233.608	54.376		886	276.606	44.276		886	255.771	111.078		886	348.417	78.004		886	301.872	60.709		886	339.551	108.343		886	121.901	43.662		886	93.975	87.877		886	71.811	128.463		886	185.29	53.39		886	48.317	218.651		886	207.454
887	120.128	113.476		887	233.608	56.288		887	276.606	42.284		887	255.771	108.161		887	348.417	79.181		887	301.872	58.15		887	339.551	107.17		887	121.901	46.04		887	93.975	93.344		887	71.811	132.142		887	185.29	56.581		887	48.317	218.78		887	207.454
888	120.128	121.066		888	233.608	56.531		888	276.606	42.729		888	255.771	109.073		888	348.417	77.772		888	301.872	60.761		888	339.551	107.723		888	121.901	43.8		888	93.975	88.401		888	71.811	141.778		888	185.29	55.61		888	48.317	229.119		888	207.454
889	120.128	116.694		889	233.608	55.074		889	276.606	42.821		889	255.771	107.054		889	348.417	81.337		889	301.872	58.802		889	339.551	109.329		889	121.901	45.996		889	93.975	94.736		889	71.811	133.802		889	185.29	57.696		889	48.317	214.982		889	207.454
890	120.128	110.941		890	233.608	56.455		890	276.606	42.893		890	255.771	110.102		890	348.417	78.73		890	301.872	60.056		890	339.551	108.398		890	121.901	42.989		890	93.975	89.708		890	71.811	137.759		890	185.29	57.923		890	48.317	221.009		890	207.454
891	120.128	105.904		891	233.608	57.884		891	276.606	43.389		891	255.771	109.373		891	348.417	77.868		891	301.872	59.043		891	339.551	110.683		891	121.901	42.451		891	93.975	91.047		891	71.811	137.556		891	185.29	56.402		891	48.317	213.991		891	207.454
892	120.128	104.878		892	233.608	55.972		892	276.606	43.72		892	255.771	107.939		892	348.417	79.3		892	301.872	58.883		892	339.551	106.909		892	121.901	42.469		892	93.975	89.311		892	71.811	133.796		892	185.29	58.344		892	48.317	223.78		892	207.454
893	120.128	109.756		893	233.608	58.112		893	276.606	44.349		893	255.771	107.101		893	348.417	78.454		893	301.872	59.878		893	339.551	110.068		893	121.901	43.098		893	93.975	91.943		893	71.811	134.963		893	185.29	56.656		893	48.317	222.908		893	207.454
894	120.128	105.114		894	233.608	58.59		894	276.606	44.962		894	255.771	111.194		894	348.417	78.621		894	301.872	59.424		894	339.551	110.906		894	121.901	44.371		894	93.975	88.222		894	71.811	135.932		894	185.29	56.498		894	48.317	223.073		894	207.454
895	120.128	113.111		895	233.608	57.226		895	276.606	42.615		895	255.771	109.854		895	348.417	80.719		895	301.872	59.48		895	339.551	108.548		895	121.901	45		895	93.975	93.274		895	71.811	130.259		895	185.29	55.407		895	48.317	222.56		895	207.454
896	120.128	107.793		896	233.608	54.753		896	276.606	42.561		896	255.771	106.986		896	348.417	80.802		896	301.872	58.537		896	339.551	110.02		896	121.901	43.571		896	93.975	90.769		896	71.811	132.784		896	185.29	56.667		896	48.317	225.413		896	207.454
897	120.128	111.214		897	233.608	59.858		897	276.606	43.05		897	255.771	108.712		897	348.417	79.91		897	301.872	58.141		897	339.551	106.752		897	121.901	43.436		897	93.975	96.594		897	71.811	129.278		897	185.29	56.098		897	48.317	216.872		897	207.454
898	120.128	102.801		898	233.608	57.131		898	276.606	43.404		898	255.771	110.705		898	348.417	81.569		898	301.872	56.972		898	339.551	106.167		898	121.901	42.189		898	93.975	94.448		898	71.811	130.914		898	185.29	55.928		898	48.317	221.78		898	207.454
899	120.128	110.196		899	233.608	57.199		899	276.606	43.554		899	255.771	111.842		899	348.417	80.07		899	301.872	56.925		899	339.551	105.789		899	121.901	41.524		899	93.975	88.736		899	71.811	123		899	185.29	57.943		899	48.317	222.395		899	207.454
900	120.128	116.018		900	233.608	57.827		900	276.606	41.947		900	255.771	108.184		900	348.417	78.701		900	301.872	57.256		900	339.551	105.163		900	121.901	43.116		900	93.975	92.679		900	71.811	130.821		900	185.29	59.45		900	48.317	214.605		900	207.454
901	120.128	116.675		901	233.608	56.326		901	276.606	44.692		901	255.771	110.948		901	348.417	77.945		901	301.872	59.699		901	339.551	105.967		901	121.901	43.618		901	93.975	88.868		901	71.811	125.265		901	185.29	56.569		901	48.317	218.477		901	207.454
902	120.128	115.852		902	233.608	57.38		902	276.606	44.5		902	255.771	112.023		902	348.417	78.223		902	301.872	58.703		902	339.551	107.245		902	121.901	43.535		902	93.975	93.995		902	71.811	134.654		902	185.29	55.122		902	48.317	216.706		902	207.454
903	120.128	122.978		903	233.608	57.478		903	276.606	43.481		903	255.771	110.534		903	348.417	79.237		903	301.872	57.999		903	339.551	107.242		903	121.901	43.545		903	93.975	93.618		903	71.811	129.179		903	185.29	55.392		903	48.317	216.771		903	207.454
904	120.128	120.594		904	233.608	57.347		904	276.606	44.316		904	255.771	113.003		904	348.417	78.004		904	301.872	57.972		904	339.551	107.473		904	121.901	41.545		904	93.975	88.151		904	71.811	125.278		904	185.29	57.431		904	48.317	215.385		904	207.454
905	120.128	118.723		905	233.608	57.939		905	276.606	44.474		905	255.771	107.068		905	348.417	77.973		905	301.872	57.814		905	339.551	109.154		905	121.901	43.378		905	93.975	90.939		905	71.811	129.463		905	185.29	57.089		905	48.317	224.294		905	207.454
906	120.128	122.321		906	233.608	60.88		906	276.606	43.027		906	255.771	108.757		906	348.417	77.571		906	301.872	59.429		906	339.551	108.954		906	121.901	42.542		906	93.975	87.811		906	71.811	128.142		906	185.29	55.38		906	48.317	217.266		906	207.454
907	120.128	117.83		907	233.608	57.142		907	276.606	42.837		907	255.771	107.024		907	348.417	80.693		907	301.872	58.73		907	339.551	109.445		907	121.901	41.276		907	93.975	88.656		907	71.811	130.846		907	185.29	57.464		907	48.317	220.826		907	207.454
908	120.128	111.41		908	233.608	54.471		908	276.606	43.529		908	255.771	111.847		908	348.417	77.955		908	301.872	58.053		908	339.551	109.272		908	121.901	40.975		908	93.975	88.16		908	71.811	128.852		908	185.29	57.368		908	48.317	221.578		908	207.454
909	120.128	113.934		909	233.608	55.583		909	276.606	43.965		909	255.771	108.638		909	348.417	76.982		909	301.872	59.361		909	339.551	108.292		909	121.901	40.836		909	93.975	83.198		909	71.811	130.241		909	185.29	55.069		909	48.317	224.495		909	207.454
910	120.128	121.583		910	233.608	53.793		910	276.606	43.958		910	255.771	106.697		910	348.417	78.584		910	301.872	58.897		910	339.551	106.402		910	121.901	43.92		910	93.975	85.92		910	71.811	128.228		910	185.29	57.275		910	48.317	206.927		910	207.454
911	120.128	114.365		911	233.608	55.427		911	276.606	42.954		911	255.771	109.873		911	348.417	76.401		911	301.872	59.206		911	339.551	107.584		911	121.901	41.524		911	93.975	83.401		911	71.811	133.92		911	185.29	55.385		911	48.317	226.761		911	207.454
912	120.128	107.262		912	233.608	57.057		912	276.606	44.309		912	255.771	110.484		912	348.417	79.361		912	301.872	58.507		912	339.551	102.752		912	121.901	41.396		912	93.975	85.646		912	71.811	134.191		912	185.29	53.926		912	48.317	217.156		912	207.454
913	120.128	119.185		913	233.608	59.03		913	276.606	42.995		913	255.771	105.298		913	348.417	78.257		913	301.872	58.981		913	339.551	105.567		913	121.901	42.705		913	93.975	85.387		913	71.811	128.401		913	185.29	54.409		913	48.317	214.78		913	207.454
914	120.128	110.72		914	233.608	59.008		914	276.606	42.825		914	255.771	108.229		914	348.417	76.368		914	301.872	57.022		914	339.551	102.012		914	121.901	43.047		914	93.975	86.316		914	71.811	129.315		914	185.29	53.328		914	48.317	218.743		914	207.454
915	120.128	109.749		915	233.608	56.622		915	276.606	43.832		915	255.771	108.867		915	348.417	78.819		915	301.872	59.536		915	339.551	101.995		915	121.901	43.331		915	93.975	83.896		915	71.811	125.006		915	185.29	50.778		915	48.317	206.55		915	207.454
916	120.128	108.672		916	233.608	58.214		916	276.606	44.772		916	255.771	109.047		916	348.417	77.356		916	301.872	60.035		916	339.551	102.443		916	121.901	40.96		916	93.975	85.344		916	71.811	125.056		916	185.29	52.007		916	48.317	218.202		916	207.454
917	120.128	110.336		917	233.608	58.689		917	276.606	42.202		917	255.771	109.062		917	348.417	77.075		917	301.872	59.949		917	339.551	105.261		917	121.901	43.091		917	93.975	83.363		917	71.811	124.938		917	185.29	52.34		917	48.317	209.734		917	207.454
918	120.128	110.502		918	233.608	61.383		918	276.606	42.505		918	255.771	109.397		918	348.417	77.679		918	301.872	56.905		918	339.551	104.001		918	121.901	42.287		918	93.975	81.264		918	71.811	128.691		918	185.29	53.411		918	48.317	217.55		918	207.454
919	120.128	101.041		919	233.608	60.533		919	276.606	42.002		919	255.771	107.237		919	348.417	78.7		919	301.872	59.88		919	339.551	105.508		919	121.901	43.462		919	93.975	81.981		919	71.811	129.543		919	185.29	50.806		919	48.317	210.018		919	207.454
920	120.128	101.148		920	233.608	65.742		920	276.606	42.455		920	255.771	110.331		920	348.417	76.966		920	301.872	58.833		920	339.551	106.967		920	121.901	47.007		920	93.975	80.108		920	71.811	129.216		920	185.29	51.148		920	48.317	223.706		920	207.454
921	120.128	97.28		921	233.608	63.869		921	276.606	43.843		921	255.771	109.681		921	348.417	78.192		921	301.872	58.567		921	339.551	108.439		921	121.901	44.716		921	93.975	80.358		921	71.811	130.469		921	185.29	49.201		921	48.317	216.697		921	207.454
922	120.128	99.107		922	233.608	65.195		922	276.606	43.676		922	255.771	109.262		922	348.417	76.303		922	301.872	61.342		922	339.551	107.662		922	121.901	46.015		922	93.975	77.387		922	71.811	129.821		922	185.29	51.407		922	48.317	219.284		922	207.454
923	120.128	96.491		923	233.608	71.848		923	276.606	43.186		923	255.771	114.74		923	348.417	79.344		923	301.872	60.866		923	339.551	107.15		923	121.901	43.953		923	93.975	82.698		923	71.811	133.728		923	185.29	52.062		923	48.317	236.239		923	207.454
924	120.128	97.841		924	233.608	69.696		924	276.606	44.851		924	255.771	107.09		924	348.417	78.93		924	301.872	58.624		924	339.551	107.97		924	121.901	45.6		924	93.975	77.151		924	71.811	135.241		924	185.29	52.785		924	48.317	225.358		924	207.454
925	120.128	99.251		925	233.608	69.586		925	276.606	42.139		925	255.771	110.435		925	348.417	76.74		925	301.872	57.767		925	339.551	108.099		925	121.901	42.745		925	93.975	76.821		925	71.811	134.883		925	185.29	51.756		925	48.317	217.881		925	207.454
926	120.128	99.697		926	233.608	74.943		926	276.606	44.728		926	255.771	112.092		926	348.417	76.043		926	301.872	59.601		926	339.551	111.663		926	121.901	44.182		926	93.975	72.566		926	71.811	133.667		926	185.29	48.462		926	48.317	218.945		926	207.454
927	120.128	99.214		927	233.608	73.326		927	276.606	43.846		927	255.771	106.262		927	348.417	78.12		927	301.872	58.007		927	339.551	113.952		927	121.901	41.578		927	93.975	76.825		927	71.811	133.043		927	185.29	51.144		927	48.317	234.972		927	207.454
928	120.128	100.107		928	233.608	78.615		928	276.606	43.636		928	255.771	106.137		928	348.417	77.78		928	301.872	58.881		928	339.551	112.654		928	121.901	43.087		928	93.975	74.5		928	71.811	132.698		928	185.29	50.136		928	48.317	218.083		928	207.454
929	120.128	99.849		929	233.608	77.362		929	276.606	43.098		929	255.771	105.787		929	348.417	78.771		929	301.872	58.725		929	339.551	109.97		929	121.901	45.6		929	93.975	78.41		929	71.811	137.204		929	185.29	48.215		929	48.317	223.945		929	207.454
930	120.128	100.635		930	233.608	79.008		930	276.606	44.096		930	255.771	106.69		930	348.417	77.073		930	301.872	55.646		930	339.551	109.43		930	121.901	43.524		930	93.975	76.816		930	71.811	131.599		930	185.29	50.352		930	48.317	227.706		930	207.454
931	120.128	97.934		931	233.608	76.342		931	276.606	43.921		931	255.771	100.806		931	348.417	78.009		931	301.872	57.144		931	339.551	110.304		931	121.901	43.411		931	93.975	77.495		931	71.811	136.302		931	185.29	49.404		931	48.317	228.505		931	207.454
932	120.128	101.727		932	233.608	78.546		932	276.606	43.777		932	255.771	101.276		932	348.417	77.76		932	301.872	58.26		932	339.551	109.298		932	121.901	45.109		932	93.975	76.613		932	71.811	140.728		932	185.29	47.474		932	48.317	217.119		932	207.454
933	120.128	109.14		933	233.608	76.926		933	276.606	45.064		933	255.771	98.957		933	348.417	77.192		933	301.872	56.38		933	339.551	106.748		933	121.901	40.767		933	93.975	78.675		933	71.811	135.809		933	185.29	48.49		933	48.317	220.642		933	207.454
934	120.128	104.771		934	233.608	80.545		934	276.606	42.846		934	255.771	104.045		934	348.417	77.98		934	301.872	57.601		934	339.551	104.597		934	121.901	45.96		934	93.975	76.344		934	71.811	129.228		934	185.29	49.105		934	48.317	214.872		934	207.454
935	120.128	101.897		935	233.608	85.063		935	276.606	45.657		935	255.771	102.899		935	348.417	76.602		935	301.872	56.414		935	339.551	107.681		935	121.901	44.244		935	93.975	73.542		935	71.811	126.42		935	185.29	49.639		935	48.317	221.376		935	207.454
936	120.128	105.528		936	233.608	81.529		936	276.606	45.199		936	255.771	103.693		936	348.417	77.373		936	301.872	57.789		936	339.551	105.295		936	121.901	43.607		936	93.975	72.552		936	71.811	134.401		936	185.29	50.373		936	48.317	227.349		936	207.454
937	120.128	109.125		937	233.608	81.626		937	276.606	44.223		937	255.771	101.692		937	348.417	78.88		937	301.872	58.188		937	339.551	107.708		937	121.901	46.127		937	93.975	68.962		937	71.811	134.006		937	185.29	50.943		937	48.317	213.642		937	207.454
938	120.128	110.749		938	233.608	81.71		938	276.606	47.463		938	255.771	98.562		938	348.417	76.935		938	301.872	56.445		938	339.551	106.098		938	121.901	44.651		938	93.975	79.967		938	71.811	129.914		938	185.29	52.072		938	48.317	225.229		938	207.454
939	120.128	106.572		939	233.608	79.991		939	276.606	44.649		939	255.771	97.026		939	348.417	78.782		939	301.872	57.435		939	339.551	109.094		939	121.901	42.364		939	93.975	74.929		939	71.811	128.525		939	185.29	53.806		939	48.317	214.339		939	207.454
940	120.128	110.653		940	233.608	80.662		940	276.606	44.849		940	255.771	98.802		940	348.417	78.403		940	301.872	56.283		940	339.551	109.832		940	121.901	44.778		940	93.975	79.415		940	71.811	127.938		940	185.29	55.299		940	48.317	211.651		940	207.454
941	120.128	108.255		941	233.608	82.34		941	276.606	43.553		941	255.771	94.775		941	348.417	77.607		941	301.872	57.765		941	339.551	111.086		941	121.901	43.756		941	93.975	80.269		941	71.811	124.062		941	185.29	56.849		941	48.317	208.349		941	207.454
942	120.128	105.066		942	233.608	82.131		942	276.606	44.409		942	255.771	101.527		942	348.417	80.12		942	301.872	57.9		942	339.551	112.597		942	121.901	42.029		942	93.975	78.778		942	71.811	127.247		942	185.29	58.742		942	48.317	210.679		942	207.454
943	120.128	106.653		943	233.608	80.051		943	276.606	43.865		943	255.771	99.094		943	348.417	76.594		943	301.872	58.617		943	339.551	113.762		943	121.901	43.702		943	93.975	77.858		943	71.811	133.296		943	185.29	59.639		943	48.317	219.275		943	207.454
944	120.128	109.469		944	233.608	81.987		944	276.606	42.75		944	255.771	97.856		944	348.417	79.249		944	301.872	57.157		944	339.551	117.897		944	121.901	42.945		944	93.975	69.094		944	71.811	132.265		944	185.29	60.962		944	48.317	212.147		944	207.454
945	120.128	105.705		945	233.608	78.231		945	276.606	43.261		945	255.771	98.218		945	348.417	77.177		945	301.872	57.63		945	339.551	113.164		945	121.901	42.527		945	93.975	73.274		945	71.811	122.179		945	185.29	63.593		945	48.317	215.881		945	207.454
946	120.128	110.79		946	233.608	79.799		946	276.606	44.923		946	255.771	97.802		946	348.417	77.296		946	301.872	58.85		946	339.551	116.488		946	121.901	42.171		946	93.975	77.184		946	71.811	128.383		946	185.29	61.335		946	48.317	215.275		946	207.454
947	120.128	108.273		947	233.608	78.81		947	276.606	42.149		947	255.771	100.043		947	348.417	79.73		947	301.872	58.231		947	339.551	118.337		947	121.901	44.047		947	93.975	73.778		947	71.811	130.846		947	185.29	60.033		947	48.317	212.367		947	207.454
948	120.128	109.679		948	233.608	78.808		948	276.606	42.324		948	255.771	99.135		948	348.417	78.533		948	301.872	57.386		948	339.551	115.854		948	121.901	44.796		948	93.975	74.958		948	71.811	136.278		948	185.29	58.112		948	48.317	210.835		948	207.454
949	120.128	118.97		949	233.608	79.076		949	276.606	43.862		949	255.771	98.315		949	348.417	79.487		949	301.872	56.429		949	339.551	113.08		949	121.901	44.029		949	93.975	74.708		949	71.811	125.914		949	185.29	60.376		949	48.317	199.22		949	207.454
950	120.128	112.491		950	233.608	82.558		950	276.606	43.343		950	255.771	98.289		950	348.417	77.961		950	301.872	60.113		950	339.551	113.97		950	121.901	43.378		950	93.975	71.193		950	71.811	141.944		950	185.29	62.445		950	48.317	205.972		950	207.454
951	120.128	109.199		951	233.608	80.49		951	276.606	43.429		951	255.771	100.802		951	348.417	78.809		951	301.872	56.351		951	339.551	114.645		951	121.901	42.265		951	93.975	73.321		951	71.811	127.198		951	185.29	60.447		951	48.317	203.697		951	207.454
952	120.128	110.723		952	233.608	79.524		952	276.606	42.795		952	255.771	97.842		952	348.417	77.21		952	301.872	58.023		952	339.551	114.953		952	121.901	44.811		952	93.975	74.816		952	71.811	126.265		952	185.29	61.435		952	48.317	210.046		952	207.454
953	120.128	108.255		953	233.608	80.71		953	276.606	42.699		953	255.771	97.173		953	348.417	80.541		953	301.872	59.244		953	339.551	115.98		953	121.901	44.244		953	93.975	75.34		953	71.811	133.049		953	185.29	60.902		953	48.317	207.128		953	207.454
954	120.128	109.402		954	233.608	74.066		954	276.606	43.444		954	255.771	98.269		954	348.417	79.63		954	301.872	58.764		954	339.551	112.222		954	121.901	42.458		954	93.975	76.552		954	71.811	135.16		954	185.29	61.359		954	48.317	213.257		954	207.454
955	120.128	109.137		955	233.608	79.772		955	276.606	43.503		955	255.771	101.802		955	348.417	79.111		955	301.872	59.539		955	339.551	114.178		955	121.901	44.018		955	93.975	77.835		955	71.811	136.852		955	185.29	60.902		955	48.317	196.578		955	207.454
956	120.128	111.306		956	233.608	77.315		956	276.606	44.604		956	255.771	100.747		956	348.417	80.352		956	301.872	56.943		956	339.551	114.475		956	121.901	44.302		956	93.975	78.925		956	71.811	121.864		956	185.29	60.108		956	48.317	201.862		956	207.454
957	120.128	109.812		957	233.608	79.258		957	276.606	43.7		957	255.771	106.451		957	348.417	81.134		957	301.872	58.404		957	339.551	112.53		957	121.901	44.4		957	93.975	73.387		957	71.811	128.531		957	185.29	63.462		957	48.317	212		957	207.454
958	120.128	111.214		958	233.608	72.886		958	276.606	44.163		958	255.771	106.932		958	348.417	82.566		958	301.872	56.27		958	339.551	114.33		958	121.901	44.709		958	93.975	73.146		958	71.811	133.241		958	185.29	64.385		958	48.317	218.688		958	207.454
959	120.128	106.561		959	233.608	77.19		959	276.606	44.841		959	255.771	110.376		959	348.417	79.13		959	301.872	58.755		959	339.551	114.561		959	121.901	43.484		959	93.975	75.726		959	71.811	129.648		959	185.29	60.156		959	48.317	197.275		959	207.454
960	120.128	113.539		960	233.608	77.457		960	276.606	44.795		960	255.771	109.374		960	348.417	80.396		960	301.872	57.209		960	339.551	115.411		960	121.901	42.531		960	93.975	81.25		960	71.811	131.093		960	185.29	62.344		960	48.317	209.899		960	207.454
961	120.128	107.203		961	233.608	73.192		961	276.606	43.59		961	255.771	104.127		961	348.417	78.772		961	301.872	57.07		961	339.551	113.585		961	121.901	44.771		961	93.975	77.75		961	71.811	125.025		961	185.29	62.835		961	48.317	211.349		961	207.454
962	120.128	110.192		962	233.608	72.573		962	276.606	42.917		962	255.771	105.031		962	348.417	77.508		962	301.872	57.972		962	339.551	112.923		962	121.901	45.775		962	93.975	77.264		962	71.811	130.321		962	185.29	61.919		962	48.317	209.89		962	207.454
963	120.128	111.827		963	233.608	72.173		963	276.606	43.032		963	255.771	104.373		963	348.417	79.246		963	301.872	59.671		963	339.551	112.315		963	121.901	44.825		963	93.975	77.476		963	71.811	128.537		963	185.29	61.194		963	48.317	202.789		963	207.454
964	120.128	109.517		964	233.608	72.913		964	276.606	44.718		964	255.771	110.449		964	348.417	80.489		964	301.872	57.696		964	339.551	110.539		964	121.901	44.487		964	93.975	78.509		964	71.811	129.907		964	185.29	64.998		964	48.317	209.578		964	207.454
965	120.128	110.62		965	233.608	67.545		965	276.606	44.029		965	255.771	107.4		965	348.417	77.897		965	301.872	60.875		965	339.551	111.567		965	121.901	43.415		965	93.975	79.59		965	71.811	138.944		965	185.29	57.691		965	48.317	201.239		965	207.454
966	120.128	114.76		966	233.608	71.034		966	276.606	43.221		966	255.771	107.733		966	348.417	81.832		966	301.872	57.781		966	339.551	108.467		966	121.901	44.364		966	93.975	78.811		966	71.811	126.321		966	185.29	62.072		966	48.317	210.101		966	207.454
967	120.128	112.214		967	233.608	67.911		967	276.606	42.942		967	255.771	108.482		967	348.417	80.206		967	301.872	59.518		967	339.551	105.338		967	121.901	41.665		967	93.975	75.269		967	71.811	133.5		967	185.29	64.943		967	48.317	203		967	207.454
968	120.128	110.653		968	233.608	66.617		968	276.606	42.872		968	255.771	109.51		968	348.417	80.543		968	301.872	58.082		968	339.551	109.166		968	121.901	44.124		968	93.975	82.113		968	71.811	128.802		968	185.29	62.983		968	48.317	196.514		968	207.454
969	120.128	109.827		969	233.608	70.865		969	276.606	44.141		969	255.771	108.468		969	348.417	79.303		969	301.872	58.253		969	339.551	104.745		969	121.901	44.393		969	93.975	77.703		969	71.811	133.191		969	185.29	62.632		969	48.317	201.165		969	207.454
970	120.128	113.103		970	233.608	68.586		970	276.606	44.476		970	255.771	106.867		970	348.417	79.271		970	301.872	57.959		970	339.551	105.654		970	121.901	42.316		970	93.975	77.099		970	71.811	129.988		970	185.29	62.675		970	48.317	215.459		970	207.454
971	120.128	111.413		971	233.608	64.924		971	276.606	44.577		971	255.771	106.588		971	348.417	80.209		971	301.872	57.637		971	339.551	104.657		971	121.901	44.771		971	93.975	78.179		971	71.811	134.451		971	185.29	62.4		971	48.317	211.349		971	207.454
972	120.128	109.731		972	233.608	66.757		972	276.606	44.189		972	255.771	103.383		972	348.417	79.883		972	301.872	57.612		972	339.551	103.449		972	121.901	44.015		972	93.975	78.274		972	71.811	129.463		972	185.29	59.84		972	48.317	206.55		972	207.454
973	120.128	112.14		973	233.608	68.07		973	276.606	42.931		973	255.771	105.01		973	348.417	79.734		973	301.872	56.897		973	339.551	111.347		973	121.901	44.669		973	93.975	74.788		973	71.811	131.235		973	185.29	59.084		973	48.317	205.009		973	207.454
974	120.128	116.945		974	233.608	67.835		974	276.606	43.843		974	255.771	101.624		974	348.417	78.989		974	301.872	56.004		974	339.551	112.546		974	121.901	45.575		974	93.975	73.481		974	71.811	126.315		974	185.29	59.505		974	48.317	198.624		974	207.454
975	120.128	116.827		975	233.608	66.609		975	276.606	41.936		975	255.771	104.173		975	348.417	75.219		975	301.872	55.606		975	339.551	114.667		975	121.901	46.375		975	93.975	70.566		975	71.811	136.469		975	185.29	59.483		975	48.317	198.422		975	207.454
976	120.128	120.542		976	233.608	67.763		976	276.606	42.332		976	255.771	107.286		976	348.417	78.593		976	301.872	57.32		976	339.551	115.594		976	121.901	42.771		976	93.975	77.34		976	71.811	133.111		976	185.29	62.684		976	48.317	191.303		976	207.454
977	120.128	114.753		977	233.608	67.051		977	276.606	43.341		977	255.771	105.795		977	348.417	79.569		977	301.872	57.507		977	339.551	117.106		977	121.901	43.455		977	93.975	70.792		977	71.811	136.432		977	185.29	58.426		977	48.317	202.716		977	207.454
978	120.128	112.1		978	233.608	65.59		978	276.606	41.989		978	255.771	106.031		978	348.417	78.654		978	301.872	55.207		978	339.551	121.599		978	121.901	41.847		978	93.975	70.84		978	71.811	128.654		978	185.29	56.694		978	48.317	191.486		978	207.454
979	120.128	108.937		979	233.608	65.194		979	276.606	42.636		979	255.771	105.503		979	348.417	81.211		979	301.872	56.04		979	339.551	128.394		979	121.901	45.244		979	93.975	71.509		979	71.811	128.407		979	185.29	59.844		979	48.317	198.385		979	207.454
980	120.128	112.107		980	233.608	67.391		980	276.606	42.519		980	255.771	103.724		980	348.417	79.84		980	301.872	55.427		980	339.551	127.586		980	121.901	43.167		980	93.975	73.844		980	71.811	128.142		980	185.29	59.947		980	48.317	205.156		980	207.454
981	120.128	110.797		981	233.608	69.991		981	276.606	44.489		981	255.771	105.667		981	348.417	78.317		981	301.872	56.485		981	339.551	134.896		981	121.901	42.291		981	93.975	72.33		981	71.811	129.167		981	185.29	60.304		981	48.317	200.688		981	207.454
982	120.128	108.232		982	233.608	68.157		982	276.606	43.758		982	255.771	106.21		982	348.417	78.678		982	301.872	54.79		982	339.551	143.191		982	121.901	45.309		982	93.975	75.627		982	71.811	122.031		982	185.29	60.766		982	48.317	205.991		982	207.454
983	120.128	109.616		983	233.608	68.309		983	276.606	42.25		983	255.771	103.653		983	348.417	81.162		983	301.872	56.761		983	339.551	152.125		983	121.901	44.596		983	93.975	74.325		983	71.811	124.784		983	185.29	61.469		983	48.317	191.789		983	207.454
984	120.128	108.413		984	233.608	66.176		984	276.606	43.782		984	255.771	108.743		984	348.417	79.715		984	301.872	59.046		984	339.551	151.721		984	121.901	44.829		984	93.975	71.797		984	71.811	126.549		984	185.29	59.407		984	48.317	198.908		984	207.454
985	120.128	112.494		985	233.608	68.368		985	276.606	43.662		985	255.771	106.562		985	348.417	81.323		985	301.872	55.524		985	339.551	156.914		985	121.901	44.629		985	93.975	77.5		985	71.811	127.543		985	185.29	61.431		985	48.317	208.927		985	207.454
986	120.128	109.1		986	233.608	68.171		986	276.606	42.774		986	255.771	104.626		986	348.417	81.601		986	301.872	54.698		986	339.551	161.956		986	121.901	46.782		986	93.975	76.91		986	71.811	126.123		986	185.29	61.529		986	48.317	194.239		986	207.454
987	120.128	112.1		987	233.608	68.829		987	276.606	42.939		987	255.771	104.269		987	348.417	80.009		987	301.872	55.633		987	339.551	162.04		987	121.901	43.567		987	93.975	66.863		987	71.811	120.142		987	185.29	62.033		987	48.317	193.862		987	207.454
988	120.128	112.221		988	233.608	70.04		988	276.606	43.024		988	255.771	107.236		988	348.417	82.406		988	301.872	56.341		988	339.551	166.631		988	121.901	43.975		988	93.975	70.458		988	71.811	120.691		988	185.29	60.687		988	48.317	204.367		988	207.454
989	120.128	110.244		989	233.608	71.061		989	276.606	42.071		989	255.771	106.282		989	348.417	78.399		989	301.872	57		989	339.551	180.27		989	121.901	44.567		989	93.975	70.094		989	71.811	125.025		989	185.29	63.632		989	48.317	204.018		989	207.454
990	120.128	109.1		990	233.608	70.503		990	276.606	42.361		990	255.771	104.244		990	348.417	78.587		990	301.872	56.944		990	339.551	180.008		990	121.901	45.415		990	93.975	68.962		990	71.811	122.66		990	185.29	63.943		990	48.317	196.128		990	207.454
991	120.128	118.554		991	233.608	71.666		991	276.606	42.28		991	255.771	107.605		991	348.417	79.795		991	301.872	56.038		991	339.551	181.389		991	121.901	44.905		991	93.975	77.689		991	71.811	124.605		991	185.29	63.148		991	48.317	194.459		991	207.454
992	120.128	116.557		992	233.608	71.459		992	276.606	41.09		992	255.771	104.255		992	348.417	78.186		992	301.872	54.994		992	339.551	178.187		992	121.901	42.615		992	93.975	74.217		992	71.811	125.235		992	185.29	64.01		992	48.317	201.569		992	207.454
993	120.128	115.554		993	233.608	68.461		993	276.606	42.228		993	255.771	105.648		993	348.417	78.316		993	301.872	56.292		993	339.551	177.559		993	121.901	45		993	93.975	73.458		993	71.811	118.852		993	185.29	62.11		993	48.317	216.917		993	207.454
994	120.128	119.79		994	233.608	68.88		994	276.606	42.622		994	255.771	100.792		994	348.417	75.601		994	301.872	57.289		994	339.551	177.432		994	121.901	42.062		994	93.975	72.193		994	71.811	114.735		994	185.29	62.471		994	48.317	198.706		994	207.454
995	120.128	119.616		995	233.608	67.774		995	276.606	44.054		995	255.771	104.121		995	348.417	77.72		995	301.872	59.319		995	339.551	169.362		995	121.901	46.876		995	93.975	67.255		995	71.811	120.765		995	185.29	59.811		995	48.317	203.128		995	207.454
996	120.128	114.701		996	233.608	69.442		996	276.606	42.088		996	255.771	106.107		996	348.417	79.145		996	301.872	55.457		996	339.551	170.91		996	121.901	44.462		996	93.975	69.373		996	71.811	117.741		996	185.29	62.132		996	48.317	198.881		996	207.454
997	120.128	118.181		997	233.608	67.45		997	276.606	43.287		997	255.771	102.369		997	348.417	80.802		997	301.872	56.138		997	339.551	167.774		997	121.901	43.651		997	93.975	67.665		997	71.811	113.833		997	185.29	62.722		997	48.317	206.44		997	207.454
998	120.128	119.823		998	233.608	68.917		998	276.606	43.708		998	255.771	104.341		998	348.417	77.902		998	301.872	54.862		998	339.551	166.386		998	121.901	44.709		998	93.975	72.245		998	71.811	117.451		998	185.29	62.17		998	48.317	208.037		998	207.454
999	120.128	116.72		999	233.608	68.461		999	276.606	41.929		999	255.771	107.745		999	348.417	76.267		999	301.872	54.907		999	339.551	164.809		999	121.901	45.796		999	93.975	69.689		999	71.811	120.759		999	185.29	62.95		999	48.317	206.202		999	207.454
1000	120.128	116.273		1000	233.608	65.655		1000	276.606	42.308		1000	255.771	105.541		1000	348.417	75.646		1000	301.872	56.855		1000	339.551	166.14		1000	121.901	45.869		1000	93.975	72.175		1000	71.811	115.778		1000	185.29	63.701		1000	48.317	208.688		1000	207.454
1001	120.128	111.303		1001	233.608	61.583		1001	276.606	41.173		1001	255.771	103.894		1001	348.417	78.298		1001	301.872	55.789		1001	339.551	168.523		1001	121.901	43.127		1001	93.975	74.09		1001	71.811	110.019		1001	185.29	63.165		1001	48.317	200.578		1001	207.454
1002	120.128	108.69		1002	233.608	60.719		1002	276.606	42.349		1002	255.771	104.678		1002	348.417	76.793		1002	301.872	57.523		1002	339.551	162.329		1002	121.901	47.033		1002	93.975	72.009		1002	71.811	112.315		1002	185.29	62.225		1002	48.317	198.844		1002	207.454
1003	120.128	115.782		1003	233.608	60.125		1003	276.606	42.276		1003	255.771	105.284		1003	348.417	79.37		1003	301.872	57.286		1003	339.551	165.817		1003	121.901	44.771		1003	93.975	71.137		1003	71.811	114.21		1003	185.29	62.366		1003	48.317	195.495		1003	207.454
1004	120.128	114.476		1004	233.608	60.953		1004	276.606	41.394		1004	255.771	111.958		1004	348.417	78.735		1004	301.872	56.977		1004	339.551	159.068		1004	121.901	45.447		1004	93.975	68.241		1004	71.811	118.315		1004	185.29	64.778		1004	48.317	195.248		1004	207.454
1005	120.128	111.325		1005	233.608	59.518		1005	276.606	40.864		1005	255.771	112.981		1005	348.417	77.375		1005	301.872	57.643		1005	339.551	160.812		1005	121.901	44.676		1005	93.975	72.623		1005	71.811	119.531		1005	185.29	66.617		1005	48.317	188.358		1005	207.454
1006	120.128	107.86		1006	233.608	58.742		1006	276.606	42.63		1006	255.771	105.686		1006	348.417	76.349		1006	301.872	55.825		1006	339.551	162.202		1006	121.901	45.764		1006	93.975	71.524		1006	71.811	122.685		1006	185.29	62.057		1006	48.317	190.064		1006	207.454
1007	120.128	105.262		1007	233.608	55.412		1007	276.606	42.851		1007	255.771	110.017		1007	348.417	78.065		1007	301.872	58.175		1007	339.551	158.666		1007	121.901	46.335		1007	93.975	67.906		1007	71.811	115.037		1007	185.29	64.478		1007	48.317	200.303		1007	207.454
1008	120.128	108.62		1008	233.608	57.44		1008	276.606	40.761		1008	255.771	105.189		1008	348.417	75.662		1008	301.872	58.16		1008	339.551	158.671		1008	121.901	45.956		1008	93.975	72.679		1008	71.811	115.728		1008	185.29	66.754		1008	48.317	203.174		1008	207.454
1009	120.128	112.576		1009	233.608	55.482		1009	276.606	41.518		1009	255.771	110.393		1009	348.417	77.85		1009	301.872	56.398		1009	339.551	164.684		1009	121.901	45.105		1009	93.975	72.297		1009	71.811	110.574		1009	185.29	65.646		1009	48.317	203.587		1009	207.454
1010	120.128	112.055		1010	233.608	57.59		1010	276.606	41.679		1010	255.771	108.799		1010	348.417	76.669		1010	301.872	57.106		1010	339.551	163.264		1010	121.901	41.753		1010	93.975	69.675		1010	71.811	117.556		1010	185.29	64.467		1010	48.317	223.817		1010	207.454
1011	120.128	107.266		1011	233.608	57.676		1011	276.606	42.042		1011	255.771	108.045		1011	348.417	76.911		1011	301.872	56.684		1011	339.551	161.723		1011	121.901	44.68		1011	93.975	75.094		1011	71.811	115.549		1011	185.29	68.024		1011	48.317	193.514		1011	207.454
1012	120.128	101.897		1012	233.608	58.175		1012	276.606	40.607		1012	255.771	110.322		1012	348.417	79.22		1012	301.872	56.088		1012	339.551	162.706		1012	121.901	45.735		1012	93.975	73.236		1012	71.811	109.062		1012	185.29	66.55		1012	48.317	207.743		1012	207.454
1013	120.128	105.9		1013	233.608	58.182		1013	276.606	41.272		1013	255.771	110.153		1013	348.417	78.146		1013	301.872	56.85		1013	339.551	159.645		1013	121.901	42.815		1013	93.975	71.41		1013	71.811	116.302		1013	185.29	64.945		1013	48.317	210.431		1013	207.454
1014	120.128	108.159		1014	233.608	57.628		1014	276.606	42.556		1014	255.771	109.189		1014	348.417	76.179		1014	301.872	57.7		1014	339.551	161.279		1014	121.901	41.993		1014	93.975	74.561		1014	71.811	112.79		1014	185.29	66.289		1014	48.317	204.505		1014	207.454
1015	120.128	108.483		1015	233.608	61.668		1015	276.606	41.091		1015	255.771	110.872		1015	348.417	74.557		1015	301.872	56.493		1015	339.551	157.219		1015	121.901	43.244		1015	93.975	71.769		1015	71.811	113.123		1015	185.29	64.644		1015	48.317	209.605		1015	207.454
1016	120.128	106.823		1016	233.608	59.408		1016	276.606	42.405		1016	255.771	111.73		1016	348.417	75.459		1016	301.872	56.48		1016	339.551	154.842		1016	121.901	44.764		1016	93.975	73.778		1016	71.811	116.895		1016	185.29	64.23		1016	48.317	211.083		1016	207.454
1017	120.128	106.554		1017	233.608	61.374		1017	276.606	41.008		1017	255.771	114		1017	348.417	78.88		1017	301.872	54.984		1017	339.551	155.718		1017	121.901	42.022		1017	93.975	70.59		1017	71.811	118.377		1017	185.29	68.06		1017	48.317	207.183		1017	207.454
1018	120.128	105.395		1018	233.608	63.856		1018	276.606	42.473		1018	255.771	112.146		1018	348.417	76.248		1018	301.872	56.141		1018	339.551	153.681		1018	121.901	44.385		1018	93.975	73.066		1018	71.811	117.698		1018	185.29	68.404		1018	48.317	203.679		1018	207.454
1019	120.128	102.391		1019	233.608	64.852		1019	276.606	42.425		1019	255.771	113.868		1019	348.417	78.097		1019	301.872	55.244		1019	339.551	155.131		1019	121.901	42.113		1019	93.975	76.528		1019	71.811	110.136		1019	185.29	64.653		1019	48.317	200.642		1019	207.454
1020	120.128	99.782		1020	233.608	66.497		1020	276.606	42.553		1020	255.771	111.166		1020	348.417	78.201		1020	301.872	57.802		1020	339.551	157.043		1020	121.901	44.931		1020	93.975	76.491		1020	71.811	117.463		1020	185.29	67.311		1020	48.317	215.624		1020	207.454
1021	120.128	100.808		1021	233.608	65.205		1021	276.606	42.522		1021	255.771	114.298		1021	348.417	76.433		1021	301.872	56.695		1021	339.551	155.424		1021	121.901	42.211		1021	93.975	77.335		1021	71.811	120.13		1021	185.29	63.045		1021	48.317	217.147		1021	207.454
1022	120.128	99.627		1022	233.608	62.972		1022	276.606	42.764		1022	255.771	110.905		1022	348.417	76.476		1022	301.872	57.761		1022	339.551	157.779		1022	121.901	42.756		1022	93.975	77.91		1022	71.811	113.562		1022	185.29	63.471		1022	48.317	215.064		1022	207.454
1023	120.128	102.421		1023	233.608	62.715		1023	276.606	42.322		1023	255.771	108.146		1023	348.417	77.023		1023	301.872	57.564		1023	339.551	152.924		1023	121.901	44.295		1023	93.975	76.675		1023	71.811	115.383		1023	185.29	62.531		1023	48.317	205.972		1023	207.454
1024	120.128	110.786		1024	233.608	63.446		1024	276.606	42.112		1024	255.771	110.797		1024	348.417	77.959		1024	301.872	57.664		1024	339.551	157.709		1024	121.901	45.48		1024	93.975	74.646		1024	71.811	113.71		1024	185.29	64.476		1024	48.317	215.881		1024	207.454
1025	120.128	100.598		1025	233.608	64.361		1025	276.606	41.087		1025	255.771	108.224		1025	348.417	78.976		1025	301.872	58.141		1025	339.551	154.803		1025	121.901	47.782		1025	93.975	80.948		1025	71.811	116.765		1025	185.29	63.782		1025	48.317	206.092		1025	207.454
1026	120.128	103.07		1026	233.608	60.858		1026	276.606	42.261		1026	255.771	107.251		1026	348.417	77.664		1026	301.872	58.899		1026	339.551	156.584		1026	121.901	48.08		1026	93.975	80.632		1026	71.811	109.735		1026	185.29	64.079		1026	48.317	209.936		1026	207.454
1027	120.128	98.21		1027	233.608	62.822		1027	276.606	40.952		1027	255.771	113.359		1027	348.417	76.421		1027	301.872	58.007		1027	339.551	159.217		1027	121.901	45.127		1027	93.975	85.075		1027	71.811	118.722		1027	185.29	64.957		1027	48.317	209.376		1027	207.454
1028	120.128	100.443		1028	233.608	65.787		1028	276.606	43.473		1028	255.771	107.005		1028	348.417	78.983		1028	301.872	56.286		1028	339.551	152.06		1028	121.901	46.196		1028	93.975	78.085		1028	71.811	113.469		1028	185.29	63.5		1028	48.317	211.165		1028	207.454
1029	120.128	103.72		1029	233.608	63.342		1029	276.606	42.766		1029	255.771	109.241		1029	348.417	76.863		1029	301.872	58.065		1029	339.551	153.585		1029	121.901	44.607		1029	93.975	78.302		1029	71.811	115.284		1029	185.29	64.751		1029	48.317	212.083		1029	207.454
1030	120.128	95.827		1030	233.608	66.211		1030	276.606	40.242		1030	255.771	109.425		1030	348.417	76.403		1030	301.872	55.815		1030	339.551	154.617		1030	121.901	47.687		1030	93.975	76.571		1030	71.811	110.222		1030	185.29	61.593		1030	48.317	206.55		1030	207.454
1031	120.128	99.738		1031	233.608	65.025		1031	276.606	43.611		1031	255.771	110.237		1031	348.417	75.427		1031	301.872	55.272		1031	339.551	149.896		1031	121.901	44.924		1031	93.975	80.142		1031	71.811	115.37		1031	185.29	61.349		1031	48.317	202.615		1031	207.454
1032	120.128	96.321		1032	233.608	66.854		1032	276.606	42.484		1032	255.771	106.289		1032	348.417	75.519		1032	301.872	53.822		1032	339.551	150.376		1032	121.901	45.818		1032	93.975	80.472		1032	71.811	118.414		1032	185.29	61.222		1032	48.317	212.422		1032	207.454
1033	120.128	106.867		1033	233.608	71.281		1033	276.606	42.556		1033	255.771	109.882		1033	348.417	76.174		1033	301.872	55.935		1033	339.551	148.815		1033	121.901	45.022		1033	93.975	84.491		1033	71.811	121.778		1033	185.29	60.864		1033	48.317	210.028		1033	207.454
1034	120.128	102.701		1034	233.608	68.011		1034	276.606	44.361		1034	255.771	111.586		1034	348.417	76.519		1034	301.872	55.189		1034	339.551	153.463		1034	121.901	46.044		1034	93.975	78.656		1034	71.811	119.074		1034	185.29	59.074		1034	48.317	213.853		1034	207.454
1035	120.128	99.989		1035	233.608	67.237		1035	276.606	43.037		1035	255.771	112.288		1035	348.417	75.303		1035	301.872	56.197		1035	339.551	147.164		1035	121.901	45.702		1035	93.975	79.373		1035	71.811	122.698		1035	185.29	59.591		1035	48.317	204.853		1035	207.454
1036	120.128	103.325		1036	233.608	68.093		1036	276.606	43.337		1036	255.771	111.761		1036	348.417	77.248		1036	301.872	54.96		1036	339.551	147.965		1036	121.901	46.273		1036	93.975	82.028		1036	71.811	113.623		1036	185.29	58.531		1036	48.317	224.138		1036	207.454
1037	120.128	100.461		1037	233.608	68.75		1037	276.606	42.739		1037	255.771	113.308		1037	348.417	76.144		1037	301.872	56.374		1037	339.551	149.325		1037	121.901	44.873		1037	93.975	80.915		1037	71.811	114.284		1037	185.29	60.385		1037	48.317	204.092		1037	207.454
1038	120.128	97.41		1038	233.608	69.4		1038	276.606	40.92		1038	255.771	113.341		1038	348.417	76.546		1038	301.872	57.708		1038	339.551	150.572		1038	121.901	45.811		1038	93.975	81.642		1038	71.811	122.302		1038	185.29	61.242		1038	48.317	194.936		1038	207.454
1039	120.128	103.764		1039	233.608	68.539		1039	276.606	43.824		1039	255.771	115.4		1039	348.417	75.457		1039	301.872	54.498		1039	339.551	147.222		1039	121.901	46.604		1039	93.975	84.226		1039	71.811	119.988		1039	185.29	61.481		1039	48.317	193.688		1039	207.454
1040	120.128	97.812		1040	233.608	67.964		1040	276.606	41.522		1040	255.771	113.043		1040	348.417	76.122		1040	301.872	53.463		1040	339.551	146.761		1040	121.901	44.298		1040	93.975	78.288		1040	71.811	117.654		1040	185.29	64.498		1040	48.317	199.358		1040	207.454
1041	120.128	100.827		1041	233.608	68.203		1041	276.606	41.875		1041	255.771	109.234		1041	348.417	75.573		1041	301.872	55.488		1041	339.551	142.893		1041	121.901	45.407		1041	93.975	83.349		1041	71.811	119.944		1041	185.29	66.017		1041	48.317	199.101		1041	207.454
1042	120.128	98.948		1042	233.608	67.662		1042	276.606	42.822		1042	255.771	110.653		1042	348.417	76.561		1042	301.872	54.822		1042	339.551	147.441		1042	121.901	45.225		1042	93.975	84.283		1042	71.811	113.574		1042	185.29	61.969		1042	48.317	199.835		1042	207.454
1043	120.128	104.542		1043	233.608	66.288		1043	276.606	43.498		1043	255.771	107.362		1043	348.417	75.481		1043	301.872	55.125		1043	339.551	153.305		1043	121.901	46.225		1043	93.975	84.283		1043	71.811	113.352		1043	185.29	63.945		1043	48.317	187.33		1043	207.454
1044	120.128	98.716		1044	233.608	65.323		1044	276.606	40.825		1044	255.771	106.997		1044	348.417	74.679		1044	301.872	56.044		1044	339.551	150.922		1044	121.901	45.669		1044	93.975	82.693		1044	71.811	115.963		1044	185.29	63.165		1044	48.317	199.431		1044	207.454
1045	120.128	102.487		1045	233.608	66.615		1045	276.606	41.253		1045	255.771	109.392		1045	348.417	75.742		1045	301.872	56.72		1045	339.551	151.026		1045	121.901	46.902		1045	93.975	82.509		1045	71.811	108.907		1045	185.29	62.385		1045	48.317	201.193		1045	207.454
1046	120.128	106.782		1046	233.608	63.499		1046	276.606	40.508		1046	255.771	107.173		1046	348.417	75.936		1046	301.872	56.248		1046	339.551	147.078		1046	121.901	45.007		1046	93.975	83.042		1046	71.811	108.63		1046	185.29	62.096		1046	48.317	203.239		1046	207.454
1047	120.128	104.31		1047	233.608	65.619		1047	276.606	40.955		1047	255.771	106.981		1047	348.417	75.366		1047	301.872	56.512		1047	339.551	147.965		1047	121.901	44.905		1047	93.975	83.656		1047	71.811	119.062		1047	185.29	61.301		1047	48.317	200.404		1047	207.454
1048	120.128	101.989		1048	233.608	61.846		1048	276.606	40.784		1048	255.771	106.444		1048	348.417	77.55		1048	301.872	54.552		1048	339.551	151.426		1048	121.901	46.935		1048	93.975	84.769		1048	71.811	116.099		1048	185.29	60.505		1048	48.317	199.44		1048	207.454
1049	120.128	101.292		1049	233.608	60.579		1049	276.606	38.849		1049	255.771	106.083		1049	348.417	78.001		1049	301.872	52.226		1049	339.551	149.153		1049	121.901	45.171		1049	93.975	80.92		1049	71.811	113.235		1049	185.29	61.493		1049	48.317	198.505		1049	207.454
1050	120.128	103.288		1050	233.608	60.977		1050	276.606	40.688		1050	255.771	102.997		1050	348.417	76.871		1050	301.872	55.483		1050	339.551	148.586		1050	121.901	43.538		1050	93.975	83.292		1050	71.811	108.34		1050	185.29	62.309		1050	48.317	193.119		1050	207.454
1051	120.128	104.491		1051	233.608	61.266		1051	276.606	41.269		1051	255.771	105.017		1051	348.417	77.72		1051	301.872	56.302		1051	339.551	147.456		1051	121.901	46.113		1051	93.975	83.821		1051	71.811	114.247		1051	185.29	62.943		1051	48.317	201.826		1051	207.454
1052	120.128	103.849		1052	233.608	59.968		1052	276.606	40.176		1052	255.771	104.922		1052	348.417	75.935		1052	301.872	54.921		1052	339.551	148.59		1052	121.901	48.702		1052	93.975	80.118		1052	71.811	113.488		1052	185.29	61.928		1052	48.317	192.642		1052	207.454
1053	120.128	99.594		1053	233.608	54.359		1053	276.606	41.58		1053	255.771	104.728		1053	348.417	79.396		1053	301.872	53.095		1053	339.551	147.873		1053	121.901	48.8		1053	93.975	85.085		1053	71.811	105.852		1053	185.29	59.983		1053	48.317	197.817		1053	207.454
1054	120.128	99.572		1054	233.608	54.953		1054	276.606	41.109		1054	255.771	101.981		1054	348.417	76.467		1054	301.872	54.28		1054	339.551	146.031		1054	121.901	43.575		1054	93.975	81.255		1054	71.811	113.019		1054	185.29	62.562		1054	48.317	203.312		1054	207.454
1055	120.128	94.926		1055	233.608	53.099		1055	276.606	40.207		1055	255.771	105.406		1055	348.417	76.363		1055	301.872	54.678		1055	339.551	146.082		1055	121.901	47.058		1055	93.975	76.184		1055	71.811	109.216		1055	185.29	58.33		1055	48.317	207.752		1055	207.454
1056	120.128	100.266		1056	233.608	54.573		1056	276.606	40.429		1056	255.771	102.357		1056	348.417	78.02		1056	301.872	53.511		1056	339.551	142.521		1056	121.901	43.211		1056	93.975	79.486		1056	71.811	113.914		1056	185.29	60.414		1056	48.317	189.615		1056	207.454
1057	120.128	100.893		1057	233.608	55.666		1057	276.606	39.101		1057	255.771	101.955		1057	348.417	76.809		1057	301.872	53.705		1057	339.551	148.781		1057	121.901	42.902		1057	93.975	82.981		1057	71.811	112.759		1057	185.29	57.383		1057	48.317	194.963		1057	207.454
1058	120.128	98.369		1058	233.608	53.668		1058	276.606	39.764		1058	255.771	103.224		1058	348.417	77.121		1058	301.872	54.833		1058	339.551	147.62		1058	121.901	42.985		1058	93.975	84.491		1058	71.811	113.772		1058	185.29	54.933		1058	48.317	194.605		1058	207.454
1059	120.128	98.945		1059	233.608	56.613		1059	276.606	38.909		1059	255.771	100.05		1059	348.417	75.641		1059	301.872	51.366		1059	339.551	150.33		1059	121.901	42.375		1059	93.975	79.863		1059	71.811	114.019		1059	185.29	54.782		1059	48.317	200.917		1059	207.454
1060	120.128	98.45		1060	233.608	53.397		1060	276.606	40.184		1060	255.771	100.636		1060	348.417	75.776		1060	301.872	52.921		1060	339.551	146.587		1060	121.901	42.28		1060	93.975	76.184		1060	71.811	114.784		1060	185.29	55.026		1060	48.317	204.404		1060	207.454
1061	120.128	94.775		1061	233.608	55.588		1061	276.606	39.377		1061	255.771	98.816		1061	348.417	76.95		1061	301.872	54.811		1061	339.551	149.57		1061	121.901	41.284		1061	93.975	79.736		1061	71.811	118.34		1061	185.29	57.873		1061	48.317	200.248		1061	207.454
1062	120.128	96.055		1062	233.608	55.131		1062	276.606	38.29		1062	255.771	101.849		1062	348.417	76.623		1062	301.872	53.492		1062	339.551	147.245		1062	121.901	43.473		1062	93.975	82.486		1062	71.811	117.093		1062	185.29	55.957		1062	48.317	187.248		1062	207.454
1063	120.128	95.446		1063	233.608	62.598		1063	276.606	38.421		1063	255.771	96.988		1063	348.417	74.851		1063	301.872	52.828		1063	339.551	148.685		1063	121.901	41.505		1063	93.975	76.835		1063	71.811	107.296		1063	185.29	55.175		1063	48.317	203.807		1063	207.454
1064	120.128	95.303		1064	233.608	66.816		1064	276.606	39.417		1064	255.771	98.57		1064	348.417	77.263		1064	301.872	54.341		1064	339.551	152.931		1064	121.901	44.305		1064	93.975	78.75		1064	71.811	117.475		1064	185.29	54.318		1064	48.317	194.633		1064	207.454
1065	120.128	96.771		1065	233.608	69.254		1065	276.606	37.474		1065	255.771	98.756		1065	348.417	74.758		1065	301.872	53.396		1065	339.551	150.877		1065	121.901	44.105		1065	93.975	79.241		1065	71.811	108.327		1065	185.29	57.096		1065	48.317	196.706		1065	207.454
1066	120.128	103.491		1066	233.608	67.871		1066	276.606	38.933		1066	255.771	95.808		1066	348.417	78.692		1066	301.872	56.28		1066	339.551	150.403		1066	121.901	42.469		1066	93.975	79.335		1066	71.811	110.111		1066	185.29	56.474		1066	48.317	183.872		1066	207.454
1067	120.128	105.69		1067	233.608	70.467		1067	276.606	37.986		1067	255.771	95.019		1067	348.417	76.234		1067	301.872	55.009		1067	339.551	150.258		1067	121.901	44.571		1067	93.975	80.448		1067	71.811	114.222		1067	185.29	53.56		1067	48.317	192.376		1067	207.454
1068	120.128	94.007		1068	233.608	73.903		1068	276.606	38.5		1068	255.771	99.061		1068	348.417	76.807		1068	301.872	53.786		1068	339.551	151.513		1068	121.901	42.116		1068	93.975	79.896		1068	71.811	111.636		1068	185.29	54.28		1068	48.317	185.55		1068	207.454
1069	120.128	101.151		1069	233.608	75.444		1069	276.606	39.635		1069	255.771	94.263		1069	348.417	78.855		1069	301.872	55.436		1069	339.551	150.258		1069	121.901	44.32		1069	93.975	77.981		1069	71.811	104.531		1069	185.29	54.146		1069	48.317	188.073		1069	207.454
1070	120.128	95.967		1070	233.608	79.861		1070	276.606	38.476		1070	255.771	97.003		1070	348.417	74.833		1070	301.872	56.846		1070	339.551	148.8		1070	121.901	43.149		1070	93.975	78.156		1070	71.811	112.556		1070	185.29	53.019		1070	48.317	188.119		1070	207.454
1071	120.128	95.815		1071	233.608	76.639		1071	276.606	38.462		1071	255.771	95.91		1071	348.417	75.261		1071	301.872	56.238		1071	339.551	150.507		1071	121.901	41.549		1071	93.975	83.59		1071	71.811	109.858		1071	185.29	53.261		1071	48.317	187.706		1071	207.454
1072	120.128	97.649		1072	233.608	77.417		1072	276.606	40.111		1072	255.771	97.624		1072	348.417	75.344		1072	301.872	57.348		1072	339.551	152.253		1072	121.901	42.029		1072	93.975	79.08		1072	71.811	111.481		1072	185.29	53.127		1072	48.317	184.67		1072	207.454
1073	120.128	96.092		1073	233.608	77.116		1073	276.606	39.684		1073	255.771	96.932		1073	348.417	77.178		1073	301.872	53.51		1073	339.551	147.591		1073	121.901	44.607		1073	93.975	81.292		1073	71.811	111.599		1073	185.29	54.732		1073	48.317	205.321		1073	207.454
1074	120.128	95.03		1074	233.608	76.387		1074	276.606	38.857		1074	255.771	98.676		1074	348.417	75.294		1074	301.872	55.937		1074	339.551	148.923		1074	121.901	42.695		1074	93.975	81.189		1074	71.811	109.321		1074	185.29	54.361		1074	48.317	192.294		1074	207.454
1075	120.128	95.269		1075	233.608	81.571		1075	276.606	38.005		1075	255.771	96.34		1075	348.417	76.084		1075	301.872	58.009		1075	339.551	151.439		1075	121.901	45.196		1075	93.975	85.024		1075	71.811	104.71		1075	185.29	54.758		1075	48.317	192.651		1075	207.454
1076	120.128	97.996		1076	233.608	83.307		1076	276.606	40.325		1076	255.771	95.187		1076	348.417	75.061		1076	301.872	56.769		1076	339.551	149.013		1076	121.901	42.567		1076	93.975	80.297		1076	71.811	106.296		1076	185.29	56.215		1076	48.317	198.844		1076	207.454
1077	120.128	101.465		1077	233.608	82.106		1077	276.606	40.468		1077	255.771	95.759		1077	348.417	74.003		1077	301.872	56.336		1077	339.551	149.477		1077	121.901	42.047		1077	93.975	83.986		1077	71.811	109.204		1077	185.29	54.572		1077	48.317	196.844		1077	207.454
1078	120.128	105.86		1078	233.608	83.266		1078	276.606	39.835		1078	255.771	92.912		1078	348.417	76.045		1078	301.872	57.082		1078	339.551	149.393		1078	121.901	44.967		1078	93.975	81.17		1078	71.811	106.377		1078	185.29	57.447		1078	48.317	186.725		1078	207.454
1079	120.128	107.207		1079	233.608	80.444		1079	276.606	39.671		1079	255.771	94.423		1079	348.417	75.413		1079	301.872	56.451		1079	339.551	148.674		1079	121.901	44.436		1079	93.975	82.717		1079	71.811	107.926		1079	185.29	53.344		1079	48.317	192.596		1079	207.454
1080	120.128	109.801		1080	233.608	80.211		1080	276.606	39.479		1080	255.771	97.043		1080	348.417	75.575		1080	301.872	58.032		1080	339.551	150.295		1080	121.901	43.916		1080	93.975	81.472		1080	71.811	106.735		1080	185.29	55.237		1080	48.317	203		1080	207.454
1081	120.128	99.705		1081	233.608	82.677		1081	276.606	39.176		1081	255.771	90.397		1081	348.417	75.396		1081	301.872	55.395		1081	339.551	151.995		1081	121.901	43.633		1081	93.975	79.816		1081	71.811	113.241		1081	185.29	57.799		1081	48.317	186.899		1081	207.454
1082	120.128	104.819		1082	233.608	83.448		1082	276.606	40.713		1082	255.771	93.851		1082	348.417	73.041		1082	301.872	55.899		1082	339.551	149.572		1082	121.901	42.836		1082	93.975	80.429		1082	71.811	107.815		1082	185.29	57.112		1082	48.317	191.954		1082	207.454
1083	120.128	103.661		1083	233.608	83.565		1083	276.606	40.944		1083	255.771	93.045		1083	348.417	77.597		1083	301.872	57.141		1083	339.551	148.441		1083	121.901	43.895		1083	93.975	82.325		1083	71.811	109.704		1083	185.29	58.486		1083	48.317	185.541		1083	207.454
1084	120.128	104.387		1084	233.608	85.302		1084	276.606	38.486		1084	255.771	95.908		1084	348.417	73.931		1084	301.872	55.345		1084	339.551	150.933		1084	121.901	43.8		1084	93.975	75.425		1084	71.811	112.358		1084	185.29	58.366		1084	48.317	199.844		1084	207.454
1085	120.128	107.768		1085	233.608	79.727		1085	276.606	39.183		1085	255.771	97.619		1085	348.417	75.631		1085	301.872	55.404		1085	339.551	151.114		1085	121.901	41.858		1085	93.975	78.245		1085	71.811	109.302		1085	185.29	59.27		1085	48.317	199.835		1085	207.454
1086	120.128	105.893		1086	233.608	84.727		1086	276.606	40.2		1086	255.771	95.768		1086	348.417	76.433		1086	301.872	54.843		1086	339.551	148.379		1086	121.901	42.709		1086	93.975	77.137		1086	71.811	112.296		1086	185.29	57.325		1086	48.317	197.239		1086	207.454
1087	120.128	100.406		1087	233.608	81.6		1087	276.606	39.359		1087	255.771	94.82		1087	348.417	76.15		1087	301.872	56.022		1087	339.551	148.829		1087	121.901	41.771		1087	93.975	76.689		1087	71.811	106.994		1087	185.29	60.409		1087	48.317	187.817		1087	207.454
1088	120.128	102.362		1088	233.608	81.309		1088	276.606	38.141		1088	255.771	97.811		1088	348.417	76.486		1088	301.872	54.473		1088	339.551	150.44		1088	121.901	42.64		1088	93.975	84.156		1088	71.811	115.537		1088	185.29	59.586		1088	48.317	185.312		1088	207.454
1089	120.128	103.262		1089	233.608	82.357		1089	276.606	39.913		1089	255.771	94.13		1089	348.417	73.279		1089	301.872	56.025		1089	339.551	150.684		1089	121.901	44.131		1089	93.975	76.104		1089	71.811	119.346		1089	185.29	60.821		1089	48.317	186.046		1089	207.454
1090	120.128	100.513		1090	233.608	85.643		1090	276.606	39.54		1090	255.771	92.964		1090	348.417	74.723		1090	301.872	56.664		1090	339.551	147.854		1090	121.901	41.709		1090	93.975	79.255		1090	71.811	112.173		1090	185.29	60.933		1090	48.317	201		1090	207.454
1091	120.128	102.399		1091	233.608	83.192		1091	276.606	39.258		1091	255.771	96.816		1091	348.417	75.043		1091	301.872	55.869		1091	339.551	149.755		1091	121.901	41.825		1091	93.975	81.825		1091	71.811	111.574		1091	185.29	59.478		1091	48.317	193.835		1091	207.454
1092	120.128	101.664		1092	233.608	81.935		1092	276.606	38.394		1092	255.771	96.835		1092	348.417	74.263		1092	301.872	53.786		1092	339.551	148.873		1092	121.901	43		1092	93.975	80.792		1092	71.811	117.383		1092	185.29	59.569		1092	48.317	194.633		1092	207.454
1093	120.128	104.089		1093	233.608	82.715		1093	276.606	39.571		1093	255.771	96.324		1093	348.417	74.816		1093	301.872	55.432		1093	339.551	151.612		1093	121.901	42.945		1093	93.975	83.241		1093	71.811	113.642		1093	185.29	59.392		1093	48.317	193.798		1093	207.454
1094	120.128	105.373		1094	233.608	79.011		1094	276.606	40.75		1094	255.771	94.622		1094	348.417	75.314		1094	301.872	57.032		1094	339.551	152.163		1094	121.901	43.52		1094	93.975	78.693		1094	71.811	111.204		1094	185.29	59.617		1094	48.317	194.11		1094	207.454
1095	120.128	101.162		1095	233.608	86.734		1095	276.606	38.505		1095	255.771	96.291		1095	348.417	75.015		1095	301.872	53.932		1095	339.551	148.705		1095	121.901	42.56		1095	93.975	80.693		1095	71.811	109.5		1095	185.29	61.249		1095	48.317	206.615		1095	207.454
1096	120.128	98.288		1096	233.608	85.615		1096	276.606	39.792		1096	255.771	95.913		1096	348.417	76.768		1096	301.872	55.557		1096	339.551	147.103		1096	121.901	41.233		1096	93.975	79.684		1096	71.811	119.123		1096	185.29	62.713		1096	48.317	194.862		1096	207.454
1097	120.128	104.771		1097	233.608	84.34		1097	276.606	40.447		1097	255.771	97.61		1097	348.417	73.421		1097	301.872	56.339		1097	339.551	150.2		1097	121.901	42.807		1097	93.975	78.703		1097	71.811	114.346		1097	185.29	62.88		1097	48.317	198.789		1097	207.454
1098	120.128	102.775		1098	233.608	85.467		1098	276.606	39		1098	255.771	96.884		1098	348.417	74.969		1098	301.872	55.78		1098	339.551	150.757		1098	121.901	41.658		1098	93.975	73.66		1098	71.811	114.111		1098	185.29	63.089		1098	48.317	186.982		1098	207.454
1099	120.128	103.144		1099	233.608	84.628		1099	276.606	39.92		1099	255.771	96.542		1099	348.417	73.763		1099	301.872	54.054		1099	339.551	148.693		1099	121.901	42.076		1099	93.975	80.231		1099	71.811	119.377		1099	185.29	59.512		1099	48.317	193.486		1099	207.454
1100	120.128	103.838		1100	233.608	83.639		1100	276.606	41.218		1100	255.771	91.858		1100	348.417	75.634		1100	301.872	56.053		1100	339.551	149.064		1100	121.901	42.553		1100	93.975	79.047		1100	71.811	110.944		1100	185.29	61.266		1100	48.317	210.835		1100	207.454
1101	120.128	105.653		1101	233.608	82.076		1101	276.606	40.479		1101	255.771	97.594		1101	348.417	74.518		1101	301.872	55.518		1101	339.551	149.526		1101	121.901	39.244		1101	93.975	78.311		1101	71.811	111.84		1101	185.29	61.584		1101	48.317	194.679		1101	207.454
1102	120.128	104.945		1102	233.608	83.368		1102	276.606	40.083		1102	255.771	93.459		1102	348.417	75.363		1102	301.872	58.282		1102	339.551	148.36		1102	121.901	44.575		1102	93.975	73.014		1102	71.811	111.469		1102	185.29	57.383		1102	48.317	193.927		1102	207.454
1103	120.128	102.328		1103	233.608	80.641		1103	276.606	40.188		1103	255.771	98.731		1103	348.417	75.246		1103	301.872	55.772		1103	339.551	150.765		1103	121.901	41.265		1103	93.975	75.854		1103	71.811	109.142		1103	185.29	59.148		1103	48.317	191.706		1103	207.454
1104	120.128	99.343		1104	233.608	81.924		1104	276.606	40.279		1104	255.771	94.428		1104	348.417	74.126		1104	301.872	56.941		1104	339.551	149.564		1104	121.901	41.182		1104	93.975	72.906		1104	71.811	117.253		1104	185.29	58.275		1104	48.317	196.587		1104	207.454
1105	120.128	99.277		1105	233.608	80.78		1105	276.606	40.582		1105	255.771	96.312		1105	348.417	72.693		1105	301.872	55.179		1105	339.551	151.12		1105	121.901	42.385		1105	93.975	72.08		1105	71.811	104.685		1105	185.29	58.12		1105	48.317	191.789		1105	207.454
1106	120.128	92.642		1106	233.608	79.651		1106	276.606	40.444		1106	255.771	94.411		1106	348.417	71.67		1106	301.872	56.753		1106	339.551	148.253		1106	121.901	41.891		1106	93.975	72.972		1106	71.811	110.302		1106	185.29	59.294		1106	48.317	185.578		1106	207.454
1107	120.128	94.649		1107	233.608	81.334		1107	276.606	38.183		1107	255.771	92.735		1107	348.417	73.958		1107	301.872	55.954		1107	339.551	147.719		1107	121.901	44.833		1107	93.975	75.156		1107	71.811	109.617		1107	185.29	58.134		1107	48.317	198.706		1107	207.454
1108	120.128	97.572		1108	233.608	79.319		1108	276.606	37.574		1108	255.771	96.553		1108	348.417	74.234		1108	301.872	55.777		1108	339.551	146.944		1108	121.901	41.433		1108	93.975	74.67		1108	71.811	113.086		1108	185.29	61.342		1108	48.317	192.486		1108	207.454
1109	120.128	96.446		1109	233.608	80.416		1109	276.606	36.689		1109	255.771	97.139		1109	348.417	74.005		1109	301.872	56.195		1109	339.551	147.379		1109	121.901	42.989		1109	93.975	76.038		1109	71.811	113.519		1109	185.29	60.311		1109	48.317	196.541		1109	207.454
1110	120.128	97.76		1110	233.608	81.607		1110	276.606	36.731		1110	255.771	96.591		1110	348.417	75.65		1110	301.872	56.712		1110	339.551	145.713		1110	121.901	43.513		1110	93.975	70.519		1110	71.811	109.475		1110	185.29	58.129		1110	48.317	190.211		1110	207.454
1111	120.128	93.613		1111	233.608	80.827		1111	276.606	38.056		1111	255.771	94.433		1111	348.417	74.64		1111	301.872	56.617		1111	339.551	146.577		1111	121.901	43.564		1111	93.975	76.906		1111	71.811	115.864		1111	185.29	56.438		1111	48.317	199.936		1111	207.454
1112	120.128	97.708		1112	233.608	77.397		1112	276.606	39.127		1112	255.771	95.828		1112	348.417	74.828		1112	301.872	55.254		1112	339.551	147.495		1112	121.901	38.815		1112	93.975	76.491		1112	71.811	106.63		1112	185.29	55.957		1112	48.317	196.596		1112	207.454
1113	120.128	97.528		1113	233.608	77.88		1113	276.606	38.12		1113	255.771	96.925		1113	348.417	74.818		1113	301.872	56.088		1113	339.551	146.868		1113	121.901	41.982		1113	93.975	74.137		1113	71.811	106.099		1113	185.29	55.981		1113	48.317	195.89		1113	207.454
1114	120.128	93.923		1114	233.608	81.941		1114	276.606	39.09		1114	255.771	91.4		1114	348.417	72.098		1114	301.872	55.46		1114	339.551	143.349		1114	121.901	44.691		1114	93.975	77.085		1114	71.811	108.988		1114	185.29	57.134		1114	48.317	194.45		1114	207.454
1115	120.128	95.594		1115	233.608	77.991		1115	276.606	38.183		1115	255.771	94.743		1115	348.417	73.005		1115	301.872	57.987		1115	339.551	147.992		1115	121.901	42.607		1115	93.975	74.396		1115	71.811	109.673		1115	185.29	54.988		1115	48.317	190.183		1115	207.454
1116	120.128	96.472		1116	233.608	79.759		1116	276.606	38.003		1116	255.771	97.308		1116	348.417	73.324		1116	301.872	56.554		1116	339.551	142.988		1116	121.901	41.629		1116	93.975	77.217		1116	71.811	106.667		1116	185.29	55.01		1116	48.317	191.193		1116	207.454
1117	120.128	98.369		1117	233.608	78.347		1117	276.606	38.101		1117	255.771	95.338		1117	348.417	74.406		1117	301.872	55.903		1117	339.551	144.828		1117	121.901	42.273		1117	93.975	76.807		1117	71.811	111.901		1117	185.29	54.292		1117	48.317	194.991		1117	207.454
1118	120.128	95.199		1118	233.608	75.882		1118	276.606	37.518		1118	255.771	94.48		1118	348.417	73.912		1118	301.872	56.435		1118	339.551	145.993		1118	121.901	42.676		1118	93.975	77.575		1118	71.811	113.123		1118	185.29	54.993		1118	48.317	181.945		1118	207.454
1119	120.128	95.162		1119	233.608	79.713		1119	276.606	38.189		1119	255.771	95.548		1119	348.417	73.079		1119	301.872	55.894		1119	339.551	143.97		1119	121.901	42.029		1119	93.975	77.788		1119	71.811	108.049		1119	185.29	55.151		1119	48.317	199.376		1119	207.454
1120	120.128	104.044		1120	233.608	79.078		1120	276.606	37.681		1120	255.771	94.371		1120	348.417	72.136		1120	301.872	55.043		1120	339.551	143.035		1120	121.901	42.422		1120	93.975	76.175		1120	71.811	106.42		1120	185.29	52.416		1120	48.317	202.312		1120	207.454
1121	120.128	103.542		1121	233.608	75.364		1121	276.606	37.921		1121	255.771	95.846		1121	348.417	73.055		1121	301.872	55.429		1121	339.551	142.154		1121	121.901	41.145		1121	93.975	74.179		1121	71.811	107.71		1121	185.29	51.754		1121	48.317	191		1121	207.454
1122	120.128	97.598		1122	233.608	74.964		1122	276.606	39.176		1122	255.771	96.444		1122	348.417	72.534		1122	301.872	55.662		1122	339.551	142.772		1122	121.901	39.982		1122	93.975	74.179		1122	71.811	106.512		1122	185.29	50.667		1122	48.317	186.22		1122	207.454
1123	120.128	101.007		1123	233.608	74.006		1123	276.606	37.689		1123	255.771	91.811		1123	348.417	72.285		1123	301.872	54.881		1123	339.551	146.8		1123	121.901	42.022		1123	93.975	76.132		1123	71.811	107.673		1123	185.29	52.342		1123	48.317	192.083		1123	207.454
1124	120.128	100.638		1124	233.608	75.48		1124	276.606	39.952		1124	255.771	95.069		1124	348.417	73.864		1124	301.872	54.699		1124	339.551	145.71		1124	121.901	39.945		1124	93.975	74.689		1124	71.811	103.469		1124	185.29	51.797		1124	48.317	189.45		1124	207.454
1125	120.128	99.609		1125	233.608	74.67		1125	276.606	39.062		1125	255.771	98.161		1125	348.417	73.941		1125	301.872	57.562		1125	339.551	151.005		1125	121.901	42.985		1125	93.975	80.222		1125	71.811	104.574		1125	185.29	50.014		1125	48.317	185.459		1125	207.454
1126	120.128	99.513		1126	233.608	73.765		1126	276.606	39.228		1126	255.771	98.321		1126	348.417	71.84		1126	301.872	55.342		1126	339.551	148.85		1126	121.901	42.902		1126	93.975	78.533		1126	71.811	103.265		1126	185.29	51.553		1126	48.317	182.119		1126	207.454
1127	120.128	94.642		1127	233.608	74.427		1127	276.606	39.835		1127	255.771	93.016		1127	348.417	71.117		1127	301.872	54.674		1127	339.551	147.351		1127	121.901	39.109		1127	93.975	76.981		1127	71.811	105.704		1127	185.29	50.734		1127	48.317	184		1127	207.454
1128	120.128	97.247		1128	233.608	76.269		1128	276.606	40.149		1128	255.771	95.196		1128	348.417	71.37		1128	301.872	54.044		1128	339.551	146.04		1128	121.901	42.967		1128	93.975	77.302		1128	71.811	108.414		1128	185.29	51.122		1128	48.317	188.046		1128	207.454
1129	120.128	90.956		1129	233.608	73.277		1129	276.606	38.253		1129	255.771	94.09		1129	348.417	73.074		1129	301.872	55.216		1129	339.551	147.175		1129	121.901	41.465		1129	93.975	84.16		1129	71.811	109.957		1129	185.29	50.134		1129	48.317	185.422		1129	207.454
1130	120.128	93.325		1130	233.608	74.755		1130	276.606	37.63		1130	255.771	99.36		1130	348.417	71.344		1130	301.872	53.533		1130	339.551	148.602		1130	121.901	40.724		1130	93.975	81.703		1130	71.811	100.512		1130	185.29	48.718		1130	48.317	189.862		1130	207.454
1131	120.128	93.834		1131	233.608	72.412		1131	276.606	38.375		1131	255.771	96.594		1131	348.417	73.131		1131	301.872	56.034		1131	339.551	151.285		1131	121.901	41.138		1131	93.975	78.863		1131	71.811	105.759		1131	185.29	50.878		1131	48.317	189.055		1131	207.454
1132	120.128	96.343		1132	233.608	72.294		1132	276.606	38.724		1132	255.771	97.925		1132	348.417	70.371		1132	301.872	55.552		1132	339.551	146.757		1132	121.901	40.665		1132	93.975	77.514		1132	71.811	99.123		1132	185.29	52.249		1132	48.317	183.028		1132	207.454
1133	120.128	95.325		1133	233.608	75.721		1133	276.606	38.378		1133	255.771	98.655		1133	348.417	73.905		1133	301.872	53.449		1133	339.551	157.312		1133	121.901	41.564		1133	93.975	78.887		1133	71.811	105.383		1133	185.29	52.804		1133	48.317	199.835		1133	207.454
1134	120.128	88.605		1134	233.608	73.091		1134	276.606	39.994		1134	255.771	92.743		1134	348.417	69.852		1134	301.872	56.27		1134	339.551	142.283		1134	121.901	43.258		1134	93.975	78.028		1134	71.811	102.71		1134	185.29	52.799		1134	48.317	194.954		1134	207.454
1135	120.128	92.756		1135	233.608	74.835		1135	276.606	39.444		1135	255.771	96.52		1135	348.417	69.746		1135	301.872	54.502		1135	339.551	140.816		1135	121.901	44.695		1135	93.975	79.382		1135	71.811	106.228		1135	185.29	51.502		1135	48.317	191.972		1135	207.454
1136	120.128	89.081		1136	233.608	77.875		1136	276.606	40.228		1136	255.771	94.969		1136	348.417	70.127		1136	301.872	54.125		1136	339.551	145.363		1136	121.901	38.72		1136	93.975	77.901		1136	71.811	104.438		1136	185.29	56.098		1136	48.317	200.651		1136	207.454
1137	120.128	89.686		1137	233.608	76.017		1137	276.606	41.936		1137	255.771	100.742		1137	348.417	70.807		1137	301.872	53.637		1137	339.551	141.992		1137	121.901	42.535		1137	93.975	79.401		1137	71.811	105.383		1137	185.29	52.017		1137	48.317	197.156		1137	207.454
1138	120.128	90.605		1138	233.608	75.165		1138	276.606	39.851		1138	255.771	99.718		1138	348.417	69.667		1138	301.872	52.539		1138	339.551	142.313		1138	121.901	42.622		1138	93.975	83.599		1138	71.811	107.012		1138	185.29	55.687		1138	48.317	196.44		1138	207.454
1139	120.128	97.266		1139	233.608	74.338		1139	276.606	39.268		1139	255.771	99.542		1139	348.417	71.892		1139	301.872	53.636		1139	339.551	139.388		1139	121.901	42.764		1139	93.975	81		1139	71.811	110.994		1139	185.29	52.098		1139	48.317	189.89		1139	207.454
1140	120.128	89.221		1140	233.608	75.283		1140	276.606	39.862		1140	255.771	102.087		1140	348.417	69.216		1140	301.872	53.678		1140	339.551	141.277		1140	121.901	42.4		1140	93.975	83.995		1140	71.811	108.741		1140	185.29	53.708		1140	48.317	187.22		1140	207.454
1141	120.128	93.923		1141	233.608	77.361		1141	276.606	41.369		1141	255.771	104.336		1141	348.417	70.209		1141	301.872	54.097		1141	339.551	143.201		1141	121.901	43.916		1141	93.975	84.325		1141	71.811	110.475		1141	185.29	52.519		1141	48.317	193.11		1141	207.454
1142	120.128	87.664		1142	233.608	77.467		1142	276.606	38.306		1142	255.771	104.823		1142	348.417	71.749		1142	301.872	54.584		1142	339.551	148.555		1142	121.901	40.695		1142	93.975	83.722		1142	71.811	102.204		1142	185.29	54.687		1142	48.317	191.349		1142	207.454
1143	120.128	96.137		1143	233.608	80.027		1143	276.606	38.764		1143	255.771	103.927		1143	348.417	71.332		1143	301.872	54.385		1143	339.551	143.067		1143	121.901	42.742		1143	93.975	81.575		1143	71.811	103.994		1143	185.29	53.988		1143	48.317	190.532		1143	207.454
1144	120.128	94.258		1144	233.608	84.203		1144	276.606	39.583		1144	255.771	102.279		1144	348.417	72.088		1144	301.872	54.213		1144	339.551	146.465		1144	121.901	43.378		1144	93.975	83.811		1144	71.811	111.623		1144	185.29	53.151		1144	48.317	184.917		1144	207.454
1145	120.128	98.269		1145	233.608	80.514		1145	276.606	40.76		1145	255.771	103.582		1145	348.417	72.766		1145	301.872	53.27		1145	339.551	142.457		1145	121.901	41.742		1145	93.975	85.868		1145	71.811	110.772		1145	185.29	54.275		1145	48.317	191.477		1145	207.454
1146	120.128	98.244		1146	233.608	79.148		1146	276.606	39.772		1146	255.771	99.664		1146	348.417	69.24		1146	301.872	54.626		1146	339.551	140.603		1146	121.901	40.291		1146	93.975	82.844		1146	71.811	106.395		1146	185.29	53.73		1146	48.317	190.147		1146	207.454
1147	120.128	88.122		1147	233.608	76.732		1147	276.606	40.402		1147	255.771	103.582		1147	348.417	72.081		1147	301.872	54.43		1147	339.551	141.305		1147	121.901	42.393		1147	93.975	81.505		1147	71.811	116.185		1147	185.29	52.754		1147	48.317	195.807		1147	207.454
1148	120.128	92.236		1148	233.608	73.264		1148	276.606	41.521		1148	255.771	102.003		1148	348.417	70.989		1148	301.872	54.628		1148	339.551	142.529		1148	121.901	42.898		1148	93.975	83.085		1148	71.811	103.556		1148	185.29	50.84		1148	48.317	188.22		1148	207.454
1149	120.128	94.565		1149	233.608	73.472		1149	276.606	41.375		1149	255.771	98.965		1149	348.417	71.757		1149	301.872	55.07		1149	339.551	145.074		1149	121.901	42.335		1149	93.975	87.208		1149	71.811	110.537		1149	185.29	52.4		1149	48.317	195.321		1149	207.454
1150	120.128	96.875		1150	233.608	71.357		1150	276.606	40.288		1150	255.771	100.672		1150	348.417	72.448		1150	301.872	56.806		1150	339.551	148.778		1150	121.901	42.88		1150	93.975	82.679		1150	71.811	103.34		1150	185.29	54.407		1150	48.317	186.532		1150	207.454
[truncated: 10 more columns]

## Sheet: F0 values
136.804	87.3595	70.3039	122.008	82.3111	84.5112	185.577	57.1429	91.1888	152.801	72.6235	406.421	63.0695	190.019	145.074	88.6008

## Sheet: DeltaF values
0.231862	0.186568	0.195068	0.0095652	0.0388391	0.0532328	0.173885	-0.047423	0.105004	0.230356	0.183432	0.0859638	-0.00178383	0.235742	0.0461962	0.212878
0.159065	0.146069	0.210316	0.0160402	0.029375	0.102114	0.123739	-0.035908	0.0800772	0.230637	0.134715	0.118583	0.00569998	0.186458	0.101699	0.140294
0.118036	0.131314	0.141501	0.0177368	0.0572327	0.0631368	0.108209	-0.042138	0.0481545	0.241828	0.151872	0.0786955	0.005478	0.183016	0.0293979	0.142857
0.0825688	0.123106	0.147759	0.0453334	0.0298853	0.0669824	0.0876029	0.00698444	0.118349	0.0948201	0.140609	-0.00107902	0.0258999	0.142657	0.0242971	0.183488
0.113153	0.117394	0.122939	0.0228594	0.0435529	0.053079	0.0577393	0.0461144	0.0620707	0.133969	0.073509	0.0523976	0.028199	0.141299	0.0462307	0.166175
0.018448	0.110549	0.142226	-0.00928603	0.0391307	0.0588652	0.0553899	-0.00727805	0.0895411	0.173033	0.155728	0.0524198	0.00398758	0.0986398	-0.0182467	0.203048
0.0928463	0.0754754	0.108174	-0.0035487	0.0397138	0.0588652	0.00202116	0.0135994	0.0919208	0.124106	0.135101	0.0532539	0.0170208	0.120596	0.0521932	0.118579
0.0486371	0.0867392	0.129667	0.00448356	0.0103132	0.0157703	0.00138531	-0.0389005	0.0424191	0.116796	0.0605656	0.0765278	-0.00980672	0.0851306	0.00318374	0.0857126
0.0554279	0.0891087	0.0675079	0.0148927	0.0237621	0.0659175	-0.00760288	0.00283694	0.0449523	0.0647222	0.0932409	0.0258045	0.0185747	0.0597542	0.040992	0.100543
-0.0498466	0.0857433	0.0975916	-0.007196	0.0190362	0.0302772	-0.0170383	-0.0311305	0.094454	0.0816134	0.106749	0.0428484	0.00665131	0.0965453	0.04763	0.06718
0.0698353	0.0635935	0.0466271	-0.0167691	0.0361177	0.0551497	-0.0434155	0.0163294	0.0143236	0.0571306	0.0375014	0.028265	-0.00635022	0.0534495	0.0154258	0.0624284
0.0915452	0.0395892	0.053099	0.0109749	0.0122935	0.0439914	-0.0220659	0.0305219	-0.00776245	0.0685638	0.098019	0.0200272	-0.063446	0.0518234	-0.0421931	0.135723
0.0579132	0.0529478	0.0336264	0.0123519	0.00429941	0.00204432	-0.0426396	-0.0207005	0.0715894	0.0645651	0.0821977	0.0453999	-0.0131364	0.0463871	-0.0348313	0.0727894
0.0436446	0.071904	0.0075966	0.0117372	0.0263499	0.0301234	-0.04327	-0.0165005	0.09316	0.0513911	0.0397046	0.0491005	0.015134	0.0411981	-0.0437716	0.0954416
0.0196395	0.0224875	-0.044079	0.0160894	0.0352916	0.019403	-0.058148	-0.0497155	0.0577828	0.0105931	0.047746	0.0339315	-0.0221423	0.0221947	0.00555495	0.0864913
0.0409985	0.00116181	-0.0651589	-0.0126793	0.0388026	0.0236509	-0.0841857	-0.035593	0.0900017	0.0564827	0.0389472	0.0191685	-0.0275966	0.049992	-0.0144417	0.0834101
0.00307569	0.0433667	-0.0431829	-0.00169636	-0.00331803	0.0118655	-0.0521181	0.00500694	0.0533306	0.054022	0.0300933	-0.00383478	0.0269147	-0.00224502	-0.0184259	0.0642794
-0.00911691	-0.0258759	-0.0841906	-0.0144005	0.0519843	0.0129304	-0.0832858	-0.00892305	0.0719512	0.0388324	0.073275	0.0145403	0.0177343	0.0557283	-0.0301647	0.0605886
0.015568	-0.000486553	-0.0509208	0.0258428	0.00583018	0.0353535	-0.0741359	0.0153844	0.0750547	0.00501721	0.0306441	0.0216733	-0.0205092	0.0050911	-0.0407938	0.0637827
0.00920123	-0.0116359	0.0319907	-0.00823692	0.0136299	0.0237811	-0.070989	-0.038778	0.0398311	0.0617772	0.0683317	-0.00412759	-0.0158318	0.0319095	-0.010492	0.0804192
0.0368466	0.0324005	0.0594856	0.0122617	0.0150877	0.00354707	-0.0712207	-0.00867805	0.0241055	0.0364436	0.0224787	0.00813065	-0.0100446	0.0131956	0.0033285	0.129967
0.0433742	0.0483004	0.103224	-0.0164167	0.0293629	-0.000547055	-0.0302619	-0.00981555	0.0758333	0.029657	0.0379283	-0.0150522	-0.0721506	0.00503321	-0.0345073	0.115566
-0.0137513	0.0212283	0.0620743	-0.0152529	0.00957208	-0.00635693	-0.0811896	-0.000330555	0.0371334	0.0822155	0.0505826	0.0237499	-0.0133266	0.00304393	0.00853273	0.0839067
0.0101442	0.0176912	0.0233283	-0.0117859	0.0205913	0.0373414	-0.0664572	0.0193219	0.0618075	8.92424e-05	0.0840841	-0.00405869	-0.00876026	0.0114642	0.0357878	0.164154
0.000597698	-0.0208163	0.0239399	-0.0173265	0.0238593	0.0243372	-0.0742653	0.0114294	0.0892779	-0.0179276	0.0372398	-0.021329	-0.0125497	0.0231893	0.0158256	0.11464
-0.0320694	-0.0154134	0.00402639	-0.0041962	0.0315861	0.022586	-0.10498	0.0318694	0.0686943	0.00222928	-0.00331181	-0.0430897	-0.0288492	0.00839604	-0.0107057	0.0973942
-0.0513305	-0.0199693	0.00832202	-0.00291759	0.0328982	0.0281474	-0.133739	0.00927694	0.051883	0.00917948	-0.00101228	0.00776896	-0.0242035	-0.0330736	-0.0193565	0.16017
-0.0247597	0.00113891	0.0288614	0.00564742	0.0177484	0.0170127	-0.155304	-0.0728855	0.0119987	-0.0558658	-0.0515469	-0.00099044	0.0425006	-0.0322947	-0.0305576	0.121243
-0.0330124	0.0189504	0.0132008	-0.0120973	-0.0087608	0.0207637	-0.173302	-0.047738	0.138165	0.00215074	-0.0369097	0.00663959	-0.0337961	-0.00328176	-0.00496382	0.110171
-0.0245697	0.0363268	0.0530564	-0.00840084	0.0223893	0.0265618	-0.208458	-0.10603	0.0163962	0.0177003	-0.14295	0.0138415	-0.00744425	-0.056445	-0.0254292	0.0944822
-0.033334	0.0489299	0.0433414	-0.00337658	0.0254752	0.0311529	-0.161588	-0.071223	-0.00843139	0.0493755	-0.182482	-0.0234942	0.0320677	-0.0161173	-0.026215	0.117191
0.0123006	0.09078	0.0459586	0.00336068	-0.0164997	0.0334248	-0.0808501	-0.1362	0.0528151	-0.0161083	-0.220266	-0.045752	-0.0192566	0.0185003	-0.0410075	0.100475
-0.0295329	0.0633073	0.0260593	0.0117126	0.0126701	0.0173559	0.0106375	-0.0910855	0.0334707	-0.0294	-0.196486	0.0204553	-0.0135011	-0.034905	-0.0193978	0.107575
-0.0207978	0.0530508	0.0335553	0.0253183	0.0340281	0.0514934	0.073113	-0.13137	0.00331347	0.00243215	-0.183075	0.0276572	-0.00638193	0.00611732	-0.0323222	0.14385
-0.0682964	0.0561987	0.0358169	0.011311	-0.0226228	0.0181723	0.092388	-0.070278	0.0764474	-0.00370654	-0.206924	-0.0424131	0.00405101	0.00418593	0.01586	0.0788616
-0.0255711	0.08991	0.0519753	0.0137289	0.0236285	0.0163146	0.104173	-0.0899305	0.0132379	-0.0512192	-0.134784	-0.00342634	-0.012962	0.00442801	0.0169698	0.0419545
0.0345806	0.0569428	0.0581628	0.00621296	0.0116982	0.0347619	0.0874898	-0.106993	-0.0121051	0.00182352	-0.163411	-0.0440148	-0.000356829	0.0380826	0.00192921	0.0739632
-0.000454901	0.0372884	0.0861697	0.0229004	0.0209193	0.0146225	0.0591296	-0.0756155	0.0297421	-0.015624	-0.121442	-0.014196	-0.0100128	0.0443399	0.0068853	0.0188057
-0.0218504	0.0607432	0.0268558	-0.0103761	0.00948704	0.0240769	0.0806678	-0.0987855	-0.0072909	-0.0208792	-0.161139	0.00912224	-0.0506664	0.0605015	0.026234	0.0556903
-0.037866	0.0858578	0.048334	0.018204	-0.020193	-0.00639243	0.0621472	-0.040178	-0.0145944	0.0126546	-0.131948	-0.0108989	-0.000864206	0.0499341	0.0677714	0.0173949
-0.0910296	0.052902	0.0512072	-0.00273728	0.0192184	-0.00401405	0.0360232	-0.099993	-0.00408875	-0.0200676	-0.11614	-0.0340375	0.00181538	0.0656483	0.0072782	0.00872681
-0.0825357	0.0382614	0.0983881	0.028941	0.0149663	0.0158768	0.0389331	-0.051693	-0.0391588	-0.043379	-0.0987768	0.00167429	0.0412798	0.0852569	0.0321965	0.0344941
-0.0982881	0.0228652	0.0747763	-0.00522072	0.000581803	0.000707216	0.0341211	-0.0504855	-0.0408147	-0.0569521	-0.0713752	-0.015099	0.0280721	0.0533337	0.0465202	0.0214016
-0.0932956	0.0103079	0.0389604	-0.0176379	0.0108842	0.0230238	-0.0549741	-0.044623	0.0363109	-0.0394196	-0.0929109	-0.0139475	0.0403602	0.0451346	0.0684883	0.0567851
-0.0975864	0.0403218	0.0180654	0.00372951	0.0211987	0.00181949	-0.12785	-0.088478	-0.016042	-0.0159119	0.0199451	-0.0214865	0.00771363	0.0685744	0.0420673	0.101785
-0.127768	-0.007618	0.0700824	0.00858165	-0.0160502	0.0135812	-0.169229	0.00691444	0.00253487	-0.0538043	0.0421831	-0.011081	0.00256059	0.0459818	0.0426808	0.0300246
-0.100474	0.0347014	0.00951683	-0.0127202	-0.00469087	-0.0236327	-0.113182	0.00819194	0.00232651	-0.0841836	0.0885593	-0.04151	0.0335264	0.0187898	0.0221051	0.0453179
-0.0414259	0.056462	0.0111384	0.00520483	0.00087338	0.00726256	-0.078005	0.0255694	-0.00165424	-0.0595372	0.0640906	-0.0307404	-0.0229509	0.0390194	0.0201337	-0.0177854
-0.0894434	0.00791551	0.00687118	0.00198373	0.011929	-0.00790702	-0.0309301	-0.019038	0.00801799	-0.0148583	0.0917263	-0.0381219	0.0332886	0.0203159	0.0307214	-0.00479452
-0.0776016	0.0192594	-0.0193009	0.0159172	0.00688715	-0.0159533	0.00839049	-0.00822305	0.0340299	-0.0308136	0.0623694	-0.0215529	-0.0304348	-0.00222923	0.0509386	0.0182075
-0.0776528	0.0277531	-0.0545905	-0.0323829	0.012014	-0.00933879	0.0618023	-0.038778	-0.021569	0.0263848	0.0950861	0.00219345	0.0155621	0.016611	0.0161082	-0.0181691
-0.0332828	0.0716292	-0.04287	-0.0230474	0.00212473	-0.00201432	0.0930185	-0.039093	0.0297421	-0.0166384	0.074528	-0.00360842	-0.00595383	0.00421224	0.028426	0.0132414
-0.0357681	0.0796421	-0.0379201	4.94255e-05	0.0132897	-0.0196333	0.079132	-0.0588855	-0.0393124	-0.0386539	0.0829275	0.0371818	0.0509992	-0.0201222	-0.0190394	-0.0102234
-0.063143	0.0540124	-0.0525281	-0.0168429	-0.00382829	0.0171429	0.0946943	-0.0546155	-0.00947318	-0.0283922	0.114419	0.0123972	-0.0203506	-0.0179172	0.0596239	-0.0236431
-0.0203373	-0.000509447	-0.0221884	0.00436882	0.021879	0.00708507	0.0745679	-0.00950055	-0.105318	-0.00864105	0.0480077	0.00327608	0.00817344	-0.0202959	0.00825012	-0.0620739
-0.0682964	0.0329614	-0.0659555	-0.0039831	-0.00531048	-0.0184382	0.0849895	-0.068808	-0.0192989	-0.064223	0.0541627	0.0271823	-0.00319497	2.12632e-06	-0.0466115	-0.0807081
-0.0500586	0.0628723	-0.0100838	0.0173106	0.00598812	0.00590179	0.106409	-0.031638	-0.0850965	-0.0452376	0.0796641	0.0115385	0.0469085	-0.0216221	0.0464099	-0.0579656
-0.0416744	-0.00483639	0.0298286	0.00326233	0.00335178	0.0142439	0.0993124	-0.0521305	-0.0731981	-0.0734769	0.0555534	0.0542922	0.0655387	-0.0241481	-0.00621835	-0.0899405
-0.020849	-0.0216062	0.0396432	0.00770466	-0.0164268	-0.0199646	0.0876406	-0.030763	-0.0568035	-0.00864105	0.0273807	0.0120798	-0.0175601	-0.0313843	-0.00823111	-0.111656
0.0042891	-0.0198433	0.000356605	-0.00372902	-0.0165483	-0.0222601	0.0876622	0.0150694	0.0052216	-0.05332	0.0350917	-0.0105151	0.0152926	-0.0499982	0.0108695	-0.129195
-0.051813	-0.00687395	0.0128168	-0.00175374	-0.00890659	-0.00214448	0.0694326	0.00736944	-0.0485788	-0.102927	0.0302861	-0.01239	0.0135326	-0.0507771	-0.0110641	-0.123902
-0.0556944	-0.00179151	0.0257464	-0.00223731	-0.0280656	0.00110953	0.0450491	-0.00129305	-0.0558166	-0.0192234	0.0231672	-0.0127492	0.00107017	-0.0420253	-0.00353007	-0.126317
0.00108014	-0.045496	-0.00860449	0.0115651	-0.0600904	0.0091558	0.00638054	0.0253069	-0.0844166	-0.0596223	-0.0114221	0.0390789	-0.00435242	-0.0543241	-0.00561176	-0.107864
-0.0398908	-0.0591178	0.0511077	0.00206569	-0.0259638	-0.0312767	0.00672002	0.0126369	-0.075161	-0.00318298	0.0308782	0.00955283	0.0294198	-0.00450796	0.0167217	-0.112119
-0.0407534	-0.0341978	0.037666	0.00757352	-0.0168156	-0.00813185	-0.0223138	-0.00771555	-0.088507	-0.0145376	0.00452312	0.0180859	0.0354925	-0.0304633	-0.0141522	-0.0755614
-0.0168287	-0.0548825	0.0317347	7.4014e-05	-0.00861501	-0.0232186	0.0480614	0.0213694	-0.0877832	-0.0807085	-0.00430322	-0.00397011	-0.00354379	-0.0294266	0.01586	-0.078541
0.00971291	-0.00167704	0.0309808	-0.0144824	-0.00567495	0.000435063	0.0495325	0.0292619	-0.0873226	-0.0477048	0.0282482	0.0405675	-0.036333	-0.00534472	0.0535925	-0.0732251
-0.0271573	-0.0367619	0.0367557	0.0235315	-0.0251984	-0.0217395	0.0575076	-0.019738	-0.123731	-0.0418476	-0.00766302	0.0336387	0.014151	-0.0251428	0.0494635	-0.086927
0.020714	-0.0296763	-0.00113691	0.00882754	-0.0220761	-0.0285315	0.017314	0.0135294	-0.0338841	-0.046409	-0.0130607	0.0165284	0.0581183	-0.0327684	0.0429979	-0.0889811
0.000137186	-0.0820919	-0.0319033	-0.0302355	-0.00804401	-0.0214082	0.0156382	0.0162069	-0.048524	-0.0593801	-0.0142174	-0.0184625	0.0162439	-0.00247658	0.00376276	-0.0564306
-0.0615787	-0.0572634	-0.0907621	-0.00392572	-0.0382343	-0.0122378	0.0144149	0.0350369	-0.0903712	-0.0447926	-0.0307822	0.00456292	0.0263439	-0.0593973	-0.00808636	-0.10187
0.00302452	-0.0333508	-0.0694261	-0.015802	-0.00705994	-0.0658402	0.0173463	0.0463769	-0.101337	-0.0367167	-0.0242004	0.0145624	0.0031631	-0.0490773	0.0117656	-0.127243
-0.0149135	-0.0242733	-0.0435243	0.00609821	-0.0465929	-0.00163567	0.0440091	0.135207	-0.0776504	-0.00112148	0.0188573	-0.0253248	0.0144839	-0.0421727	-0.0288757	-0.0334737
-0.00997946	-0.0798139	-0.0272948	-0.00708126	-0.0281385	-0.0112084	0.0213555	0.0997694	-0.0964246	-0.0515399	-0.04407	0.0305459	-0.00658805	-0.0316316	0.0156119	-0.0651326
0.00879189	-0.0226021	-0.0831238	-0.0281455	-0.0335448	-0.0373469	-0.00071086	0.110392	-0.0321733	-0.0658788	0.000378457	0.00542164	-0.0193993	-0.00933906	0.00993891	-0.0669723
0.0743381	-0.0497771	-0.0387877	-0.0236703	-0.0415267	-0.0240351	-0.00123894	0.0741144	-0.064765	-0.0543278	-0.0170539	-0.0384615	0.00232275	-0.0233114	-0.0628377	-0.105697
0.0947834	-0.0328929	-0.0454161	-0.0127038	-0.0517927	-0.0343532	-0.0166935	0.0477069	-0.0226546	-0.0620044	-0.0581012	0.0112235	0.00336922	0.0107432	-0.0181364	-0.0960804
0.10085	-0.0412606	-0.0623995	0.0125076	-0.0248218	-0.0479017	-0.0367768	0.0890069	-0.0732529	0.0199647	-0.06511	-0.0274679	0.0220787	-0.0452566	-0.0367682	-0.0772995
0.136105	-0.0421649	-0.0578478	-0.000204656	-0.0635529	-0.0274429	-0.0146242	0.0897769	-0.0197047	-0.0116646	-0.0120142	0.0326225	0.00688914	0.0204212	-0.0668219	-0.100584
0.133167	-0.0592895	-0.0851294	0.0152779	-0.0508936	-0.0299869	-0.0232891	0.129029	-0.0443788	-0.10006	0.000309608	-0.00945458	0.00753922	-0.0156963	-0.00345424	-0.0821979
0.00170147	-0.0574351	-0.0785437	-0.0126629	-0.0241172	-0.0198936	0.00553453	0.122362	-0.0392137	-0.00565024	-0.0117113	-0.0145552	0.0128191	-0.0331315	0.0176177	-0.119252
0.0148078	-0.0614416	-0.0811467	-0.00151605	-0.0288917	-0.0255851	-0.0181484	0.143292	-0.0221392	-0.00193299	-0.0562561	-0.0239691	0.0151657	-0.0537189	-0.0442748	-0.0669046
0.0124102	-0.0385248	-0.0837923	-0.0198919	-0.0324393	-0.027928	-0.0185364	0.0940994	-0.102478	-0.0127182	-0.0227132	-0.0388232	-0.0397895	-0.089147	0.00591338	-0.107469
0.0335572	-0.053795	-0.0551737	-0.00134393	-0.0401174	-0.0233251	-0.0106097	0.105877	-0.0493465	0.00497794	-0.0581976	-0.0173774	0.000483513	-0.0337209	-0.0448469	-0.0847599
0.0182872	-0.0964349	-0.0821708	0.0178188	-0.0119924	-0.0328741	-0.00165925	0.0810619	-0.0302104	-0.0479862	-0.034803	-0.0708762	-0.00712714	-0.0700279	-0.0471491	-0.131577
0.0321026	-0.0840035	-0.0900509	-0.000516111	-0.0247975	-0.0626926	-0.0433994	0.0917369	-0.0215251	-0.0161933	-0.00054411	-0.0426837	-0.0156416	-0.107098	-0.0202594	-0.0913626
0.0360133	-0.0939509	-0.077676	-0.015802	-0.00413202	-0.0421392	0.00513577	0.0955694	-0.00827786	-0.0827307	-0.0444968	-0.0414854	-0.0246475	-0.0926046	-0.0681108	-0.0782589
0.0397047	-0.09782	-0.0877324	-0.00270449	-0.00198164	-0.0500908	0.030764	0.0860844	-0.00454933	0.00518082	-0.00950815	0.00269048	0.0322421	-0.063839	-0.028407	-0.108823
0.0346902	-0.136179	-0.0898091	-0.0121711	-0.000450864	-0.0566461	0.0115644	0.0111144	0.00533126	-0.0511341	-0.031815	-0.0270398	-0.0154671	-0.0732275	-0.00639757	-0.105268
0.0278118	-0.122557	-0.127943	0.000500216	-0.00368251	-0.0488838	0.0344282	0.0549694	-0.0402445	-0.0407154	-0.00697453	-0.0116223	-0.0197323	-0.0922152	-0.0135456	-0.083936
0.0284331	-0.093825	-0.11746	-0.0346696	-0.0378577	-0.0494518	0.0363573	0.0443994	0.0276695	0.0162475	-0.0119729	-0.0605371	-0.00100691	-0.0819793	-0.0494101	-0.123981
-0.00517698	-0.0951299	-0.0970917	0.0168926	-0.0138634	-0.0396306	0.0421447	0.0362619	0.0385919	-0.0903615	0.00402741	-0.0750541	-0.0169259	-0.112518	-0.0471078	-0.0795455
0.0294857	-0.116627	-0.100818	0.00014778	-0.00730292	-0.0626808	0.0239959	0.0755844	0.0175367	-0.0193019	-0.0639671	-0.020426	0.0269464	-0.103651	-0.0132561	-0.098349
-0.00776462	-0.126426	-0.0924689	0.0193105	0.00049676	-0.0511794	0.0418699	0.0817619	-0.0360554	-0.00354947	-0.0537776	-0.0451196	-0.0487637	-0.101099	-0.0405043	-0.111306
0.00733726	-0.127731	-0.120319	-0.00802382	-0.0365942	-0.01548	0.00428437	-0.020963	0.00615373	-0.0441447	-0.0303279	-0.0515095	-0.00598554	-0.113424	0.0111245	-0.180335
-0.0192847	-0.124468	-0.0746179	-0.0224655	-0.0185043	-0.0400329	0.0150993	0.0349144	0.00238134	0.0309921	-0.0282899	-0.0425484	0.0115031	-0.0939624	-0.0685106	-0.113044
-0.0377637	-0.131245	-0.110249	-0.000516111	0.00428726	-0.0386603	-0.0242914	-0.055123	-0.0297498	-0.0154669	-0.057399	-0.0250763	-0.0315605	-0.0794112	-0.0264701	-0.123484
-0.0802989	-0.140048	-0.11207	-0.0131628	-0.011628	-0.0547529	-0.0229281	-0.044238	-0.00294826	0.0033222	-0.0017283	-0.0464975	-0.0151659	-0.0820214	-0.0395737	-0.131611
-0.057076	-0.136522	-0.129622	0.00213945	-0.0182006	-0.0387313	-0.0604543	0.0203369	-0.0389505	-0.0108596	-0.0472921	-0.0339243	-0.0761779	-0.0960516	-0.00402636	-0.171712
-0.0702627	-0.113479	-0.132083	-0.00391753	-0.0154185	-0.027999	-0.0681223	-0.0557705	-0.0585033	-0.0271422	-0.0951278	-0.0526611	-0.0449426	-0.106245	-0.056372	-0.138676
-0.0670025	-0.12693	-0.125995	-0.0220721	-0.0301431	-0.0473692	-0.0707842	-0.031078	-0.0775955	-0.0287587	-0.0587622	-0.0429765	-0.0392821	-0.0835371	-0.0418002	-0.179059
-0.0559649	-0.089395	-0.121329	-0.0118023	-0.0324393	-0.0435946	-0.0693185	0.00971444	-0.0169193	-0.0160297	-0.0893308	-0.0310111	-0.00733326	-0.0918415	0.0313349	-0.144421
0.00186228	-0.108351	-0.124203	9.04064e-05	-0.0281871	-0.0017185	-0.0929853	-0.068178	0.00807282	0.0175825	-0.125435	-0.062727	-0.0162758	-0.0540347	-0.00819665	-0.152547
0.00728609	-0.135423	-0.117276	0.00577036	-0.0304104	-0.0583855	-0.102329	-0.030938	-0.0143861	-0.0460491	-0.0853789	-0.0087558	-0.0369514	-0.0909627	-0.0403251	-0.164014
-0.0138609	-0.110331	-0.0929668	-0.0278668	-0.0532141	-0.0362701	-0.0996456	-0.129323	-0.021569	-0.0171226	-0.116071	-0.0385525	-0.0131998	-0.103835	-0.003599	-0.131994
0.074689	-0.122511	-0.0929525	0.0133846	-0.0375175	-0.0473456	-0.146279	-0.0336155	-0.049818	-0.00540809	-0.112422	-0.033383	-0.0263757	-0.12147	-0.00284766	-0.175865
0.072423	-0.128509	-0.127047	-0.00796644	-0.0507114	-0.0575809	-0.177435	-0.00288555	-0.0494013	-0.0294	-0.101544	-0.0655049	-0.0632715	-0.121918	-0.0536424	-0.166181
0.145579	-0.0957824	-0.0954986	-0.0180314	-0.0518534	-0.0648462	-0.227539	-0.069893	-0.0993197	0.00578291	-0.0986115	-0.00487312	-0.0185907	-0.105335	-0.0606802	-0.185312
0.0770939	-0.0863272	-0.119708	-0.0642578	-0.0452808	-0.0245202	-0.241527	-0.0840855	-0.0867524	-0.0694389	-0.0730551	-0.0397705	-0.0404713	-0.14281	-0.0166682	-0.189601
0.129636	-0.0857892	-0.126293	0.0153189	-0.0576728	-0.062456	-0.249988	-0.066638	-0.101645	-0.0268542	-0.0743769	-0.0113049	-0.0330192	-0.145305	-0.0293789	-0.183111
0.0727738	-0.0689966	-0.112354	-0.0334894	-0.0198286	-0.0673192	-0.276225	-0.060478	-0.0272056	-0.000925146	-0.10741	-0.0776032	-0.0404079	-0.175007	-0.06707	-0.15599
0.0475261	-0.0781885	-0.106792	-0.00512237	-0.0642333	-0.0596161	-0.262295	-0.0319705	-0.0988481	-0.0280257	-0.0659362	-0.0918028	-0.0151976	-0.192753	-0.0427307	-0.187615
0.0427017	-0.0740332	-0.108912	-0.0144414	-0.0441388	-0.0509664	-0.255295	-0.072938	-0.0432931	-0.0217299	-0.0824046	-0.00900431	-0.0498895	-0.197152	0.00911175	-0.163123
0.0179363	-0.0616934	-0.103621	-0.0020406	-0.0544047	-0.0516409	-0.263691	-0.0220305	-0.0365269	-0.0783263	-0.0738399	-0.0540586	-0.0663951	-0.206751	0.0120551	-0.198405
0.0145373	-0.0728427	-0.109723	0.0154583	-0.0377848	-0.0688457	-0.250968	-0.0105855	-0.0972471	-0.0448776	-0.066363	-0.0774236	0.00384488	-0.202025	-0.0204731	-0.154601
0.0482278	-0.0453243	-0.128441	-0.00797464	-0.0622408	-0.0590837	-0.230416	-0.0672155	-0.0168644	0.00198713	-0.0868247	-0.0494107	-0.0700101	-0.1903	-0.0365546	-0.183529
0.0680518	-0.0330073	-0.115725	-0.0234736	-0.0475405	-0.0829148	-0.214482	-0.0500305	-0.0739219	-0.0416054	-0.0538464	-0.0176948	0.0509675	-0.198447	-0.0737149	-0.17573
0.0778979	-0.0676	-0.16366	-0.0124825	-0.0891995	-0.0596043	-0.181595	-0.081408	-0.0202311	-0.0433004	-0.0649172	-0.0628402	0.000768913	-0.217466	-0.0615073	-0.135583
0.0641411	-0.0370481	-0.125909	0.00743419	-0.0620829	-0.0433698	-0.171546	-0.099993	-0.0216786	-0.00556516	-0.051602	-0.0472209	-0.0111227	-0.200194	-0.041297	-0.109918
0.0289155	-0.0719499	-0.133477	-0.0224983	-0.047662	-0.082619	-0.163592	-0.0826155	-0.0109207	0.00327639	-0.0423901	-0.0420292	-0.0419934	-0.230791	0.0333821	-0.123123
0.032585	-0.0993997	-0.14349	0.00949143	-0.0715834	-0.0679109	-0.155218	-0.0840155	-0.028039	0.0104687	-0.0717332	-0.0813063	-0.0139133	-0.213214	-0.0458188	-0.141441
0.0618239	-0.102273	-0.0899228	-0.0237605	-0.0723974	-0.038755	-0.152195	-0.061038	0.00175626	0.0349908	-0.0611581	-0.0720277	-0.0172905	-0.18168	-0.0246365	-0.130256
0.0439662	-0.0693858	-0.106906	-0.0172691	-0.0695788	-0.06132	-0.165947	-0.0851705	0.00103249	0.0055015	-0.067024	-0.0503359	0.00750751	-0.209467	0.00591338	-0.144985
0.0266495	-0.0446718	-0.120832	-0.0116711	-0.066335	-0.106616	-0.128658	-0.0812155	-0.00258637	0.0298992	-0.0695989	-0.0273326	-0.0225863	-0.177891	-0.0198941	-0.0919269
-0.00555708	-0.103635	-0.095143	-0.0301207	-0.0371531	-0.0831751	-0.167046	-0.062823	-0.0145396	0.00194786	-0.10573	-0.06986	-0.0302445	-0.239627	-0.0524223	-0.118721
-0.0476318	-0.0891546	-0.0799376	0.00668014	-0.0582681	-0.0711412	-0.157643	-0.0882855	-0.000261529	-0.00237801	-0.0912723	-0.0964064	-0.0284052	-0.212767	0.00508622	-0.117875
-0.0460383	-0.0779023	-0.089169	0.000385469	-0.0462284	-0.0437484	-0.17015	-0.146438	-0.0110743	-0.00593165	-0.0731514	-0.014036	-0.00133987	-0.230775	-0.00819665	-0.0796471
-0.0555921	-0.13516	-0.101131	-0.0164823	-0.0590335	-0.0732711	-0.152271	-0.068178	0.0459283	-0.0615202	-0.0413986	-0.0158667	0.00703184	-0.22166	-0.0323222	-0.123304
-0.0330416	-0.0998003	-0.107646	0.0170975	-0.0364606	-0.0856245	-0.157789	-0.0543005	0.0292706	-0.0316644	-0.0705765	-0.0374231	0.0335264	-0.216992	-0.0120705	-0.0899066
-0.0256734	-0.0555922	-0.100875	-0.00563053	-0.054429	-0.0842164	-0.129143	-0.076893	0.0770725	-0.00726671	-0.0697917	-0.0562263	-0.0426118	-0.267109	-0.0632306	-0.105234
-0.00299137	-0.100293	-0.0727688	0.0209169	-0.0710975	-0.0663253	-0.0564182	-0.0991705	0.0731356	-0.010984	-0.0680154	-0.0540832	0.0134058	-0.255157	0.0183002	-0.128665
-0.00383199	-0.131337	-0.0834225	0.00520483	-0.0467751	-0.0526111	0.0108746	-0.086693	0.0154641	-0.00799315	-0.0617915	-0.0416454	-0.0296578	-0.241848	-0.0388499	-0.0656969
-0.0216604	-0.0985984	-0.082626	-0.0108597	-0.0645127	-0.0787142	-0.01928	-0.0336155	0.0639349	-0.0151004	-0.0841534	-0.0448736	-0.0189871	-0.245295	0.00458992	-0.0902226
-0.0110321	-0.0701527	-0.0497117	-0.0259489	-0.0501647	-0.0800513	0.00600873	-0.133085	0.0379668	0.0048536	-0.0949901	-0.0272883	0.0107579	-0.238532	0.0161082	-0.0465661
-0.0344962	-0.0951872	-0.0656426	-0.00739271	-0.0491928	-0.117372	-0.00632578	-0.089038	0.0405549	0.0155603	-0.055127	-0.0282135	-0.0159745	-0.226839	0.0196305	-0.10108
-0.0872578	-0.0965608	-0.0736222	0.00382787	-0.0308599	-0.0609887	0.00194033	-0.0966155	0.051576	0.0323272	-0.0974273	-0.0277386	0.00891865	-0.200368	-0.0173161	-0.0292074
-0.102791	-0.0784632	-0.0547612	-0.0409151	-0.027118	-0.063166	-0.0124041	-0.109408	0.101593	0.0276021	-0.0174532	-0.0558203	-0.0115033	-0.228223	-0.0416554	-0.0801776
-0.105327	-0.0759906	-0.138697	-0.00790907	-0.0389754	-0.0571194	-0.0709351	-0.077838	0.0523984	0.0178247	-0.115948	-0.0272194	0.00420956	-0.213893	-0.00823111	-0.0471756
-0.0457971	-0.100796	-0.129323	-0.0174986	-0.0645734	-0.0870563	-0.0771697	-0.080708	0.0599542	0.000691331	-0.0925253	-0.0457298	0.0139766	-0.212046	0.00239794	-0.029072
-0.0983174	-0.125384	-0.133548	-0.0156217	-0.0435556	-0.0552972	-0.0626636	-0.12297	0.0574648	0.0616136	-0.0699569	-0.0421867	-0.0116777	-0.205009	-0.00234447	-0.0571417
-0.0660523	-0.122385	-0.0938629	0.0133764	-0.0672705	-0.0744071	-0.0542843	-0.110108	0.0111214	0.0122881	-0.0839882	-0.0202906	-0.004289	-0.230081	0.025269	-0.0329771
-0.0739322	-0.09964	-0.100605	0.0177204	-0.0349906	-0.0566816	-0.0414002	-0.098523	0.109708	-0.0173255	-0.0834236	0.00584977	0.0106945	-0.190274	0.0462307	-0.0645231
-0.11714	-0.109072	-0.100107	0.019122	-0.0211893	-0.0687037	-0.0525546	-0.0360305	0.0529687	0.0194412	-0.0878712	-0.0250296	-0.0247109	-0.200352	0.0396272	-0.0420967
-0.0704016	-0.0785777	-0.0784726	-0.0029094	-0.0440173	-0.0610124	-0.0709674	-0.112908	0.0469701	0.0309136	-0.105069	-0.0414854	0.0175282	-0.185317	0.067413	-0.0117809
-0.0993919	-0.0817714	-0.0730675	0.0131141	-0.0294384	-0.0853524	-0.078436	-0.1257	0.0373418	0.0360837	-0.115713	-0.0361363	0.00283013	-0.144652	0.0637872	-0.0238124
-0.116899	-0.0564621	-0.0913737	-0.00928603	-0.0655332	-0.0621365	-0.0967196	-0.092678	0.0819854	-0.00379161	-0.114915	-0.0454149	-0.0270258	-0.170392	0.095957	0.0629927
-0.119706	-0.0451068	-0.085613	-0.0199821	-0.0534449	-0.0578057	-0.101154	-0.028838	0.0874137	0.0675101	-0.0674508	-0.0485742	-0.0189236	-0.157298	0.0210298	0.044257
-0.130524	-0.060915	-0.105783	0.0139993	-0.0343345	-0.0740047	-0.101354	-0.0700155	0.0524533	0.0160446	-0.0636917	-0.0424795	0.00554143	-0.155798	0.0345677	0.0350697
-0.122001	-0.0628724	-0.0946167	-0.0188756	-0.0346625	-0.0922272	-0.121707	-0.0497155	0.0330539	0.0225105	-0.0802015	-0.0464753	-8.72855e-05	-0.160109	0.0524827	-0.0243542
-0.136861	-0.0753611	-0.105029	0.0373503	-0.0502133	-0.0609414	-0.0934756	-0.031708	0.0104964	0.0465875	-0.0928833	-0.0432029	-0.0275015	-0.175739	0.0342437	0.00358013
-0.0975352	-0.0970187	-0.116365	-0.00367164	-0.052473	-0.0992322	-0.101391	0.0189369	0.0822486	-0.00023798	-0.146475	-0.0451196	-0.0454816	-0.183106	0.00534126	0.0288846
-0.0738225	-0.0987128	-0.12187	-0.0115318	-0.0335934	-0.0964396	-0.0769596	-0.0200005	0.018414	0.0132174	-0.142027	-0.042322	-0.0292614	-0.186769	0.0289637	0.0154423
-0.0937853	-0.0704732	-0.116607	-0.0426527	-0.0209463	-0.0818617	-0.0902856	-0.0595855	0.00895012	0.00444784	-0.116705	-0.0173774	0.00939432	-0.210546	0.0582935	0.0551147
-0.121321	-0.0709082	-0.164186	0.00981928	-0.0424501	-0.107065	-0.101165	-0.0759305	-0.0587117	-0.0056895	-0.0872791	-0.0390028	-0.00757109	-0.220266	0.0573629	0.0281397
-0.0879814	-0.0609608	-0.120988	-8.99097e-05	-0.0656547	-0.0762411	-0.090361	-0.0515005	-0.0389505	0.0363651	-0.0900193	-0.0276254	-0.0500163	-0.205067	0.0264477	-0.0322322
-0.119033	-0.0992051	-0.135326	-0.00280285	-0.054757	-0.0928898	-0.0632294	-0.076823	0.048001	0.0356387	-0.13159	-0.0198601	-0.0213337	-0.238822	0.0282468	-0.0101895
-0.109267	-0.0878726	-0.149393	-0.0103761	-0.0348691	-0.0866895	-0.0773098	-0.0291705	0.0296873	0.013741	-0.0819089	-0.0728864	-0.0265502	-0.241269	0.0492843	-0.00646493
-0.122564	-0.0881702	-0.122197	-0.0365302	-0.0497273	-0.0820037	-0.107631	-0.0588855	-0.00212579	0.0269935	-0.0760844	0.0151505	-0.0239657	-0.2507	-0.0239886	-0.0156522
-0.0957809	-0.108729	-0.0878461	0.000655943	-0.0531048	-0.0769748	-0.106521	-0.084593	0.0290184	-0.00601018	-0.117889	-0.0314638	-0.0253293	-0.246979	0.0320173	-0.0381238
-0.131226	-0.117497	-0.125952	0.0161713	-0.0469816	-0.075898	-0.0694802	-0.096178	0.0395131	-0.0488763	-0.0961743	-0.026159	-0.0126924	-0.264325	-0.0466115	-0.0474578
-0.0955104	-0.103578	-0.126621	-0.0204738	-0.0422557	-0.0617579	-0.0845306	-0.063978	0.0182605	0.00825016	-0.0851448	-0.0732924	-0.0195262	-0.266403	-0.0169508	-0.0784733
-0.0905471	-0.0728198	-0.167813	0.0240724	-0.0385259	-0.103598	-0.0553621	-0.0196855	-0.0213167	0.0579356	-0.114598	-0.0307183	-0.0111227	-0.278239	-0.0663531	-0.132638
-0.125341	-0.102948	-0.0867225	-0.00347493	-0.0467508	-0.0745964	-0.0544622	-0.0924855	0.0578267	0.0318822	-0.120092	-0.0366333	-0.0346365	-0.245337	-0.0397185	-0.137502
-0.074495	-0.0827443	-0.114587	-0.00297497	-0.0735516	-0.0417605	-0.0132879	-0.132385	0.0808997	-0.00754812	-0.0796783	-0.0227954	-0.0178772	-0.286691	-0.0216932	-0.112547
-0.111102	-0.0720529	-0.0941047	0.00166407	-0.0647921	-0.0752709	-0.0440083	-0.071363	0.0774892	0.0274385	-0.11508	-0.061012	0.0142461	-0.264083	-0.0439852	-0.134477
-0.0922722	-0.0686646	-0.114331	0.00936849	-0.0352335	-0.0874349	-0.0268294	-0.0865705	0.0680253	0.00982083	-0.0950865	-0.0548263	-0.00790406	-0.275008	-0.0493342	-0.146938
-0.0433995	-0.099537	-0.121102	-0.0261866	-0.0647071	-0.0813529	-0.0445417	-0.050923	0.0230637	0.0111952	-0.0872516	-0.0190481	-0.0257257	-0.287743	-0.066746	-0.0902565
-0.0592031	-0.0965379	-0.129394	-0.0152938	-0.039753	-0.0910557	-0.0492999	-0.084663	0.0973491	0.0300235	-0.0782875	-0.0432693	0.0340972	-0.275629	-0.0430202	-0.0197041
-0.0415136	-0.0930466	-0.116266	-0.00921226	-0.0613904	-0.0825243	-0.0272336	-0.0991705	0.036618	0.0377394	-0.0759467	-0.0424352	0.00771363	-0.28738	-0.0641611	0.00308352
-0.126613	-0.084656	-0.135582	-0.0122776	-0.0815699	-0.0794241	-0.0275892	-0.119978	0.0342383	0.0101088	-0.10204	-0.0169493	0.0134375	-0.292211	0.00631318	0.029923
-0.104845	-0.0929092	-0.138796	0.00949143	-0.0565794	-0.118543	-0.0144195	-0.00117055	0.104433	-0.0212391	-0.0304655	-0.0207877	-0.027121	-0.330566	-0.0290549	0.0180947
-0.133353	-0.123381	-0.138057	0.0141387	-0.0465321	-0.0934459	0.00327132	-0.0822305	0.0767654	0.0287735	-0.0559532	-0.0411262	-0.00297299	-0.33777	0.00336296	0.050047
-0.130897	-0.0894752	-0.142395	0.0169909	-0.0740497	-0.0808204	-0.0130076	-0.117423	0.0589124	0.0489304	-0.0571373	-0.0177391	0.0370146	-0.360005	-0.00711444	0.0945161
-0.121942	-0.125316	-0.128669	0.00578676	-0.0573205	-0.095209	0.0137629	-0.0630855	0.0456761	-0.0210428	-0.0051294	-0.0337668	0.00831614	-0.378261	0.0286052	0.0402164
-0.131306	-0.128681	-0.113307	0.0366864	-0.0668089	-0.101149	0.041428	-0.0991005	0.120674	0.0303049	-0.0743356	-0.0682803	0.0424689	-0.374267	0.0385105	0.032327
-0.0877402	-0.0858923	-0.120832	0.00229518	-0.0605643	-0.112591	0.0105998	-0.10813	0.0428797	-0.0496027	-0.0155668	-0.0201086	0.0289759	-0.378808	0.0237594	0.102214
-0.118763	-0.0927833	-0.126365	0.00220502	-0.0874622	-0.103267	0.0233331	-0.00453055	0.070087	0.000370654	0.0104165	-0.0377381	-0.00524033	-0.384187	-0.0202939	0.0779361
-0.0868484	-0.0522955	-0.102198	-0.0039749	-0.0748029	-0.0983684	0.0293791	-0.073008	0.118349	0.0695716	-0.0578947	-0.0434046	0.00956873	-0.369983	-0.000262771	0.106153
-0.0602045	-0.0984954	-0.128057	-0.00336019	-0.0576485	-0.0965816	0.0172547	-0.0889155	0.00956423	-0.0339288	-0.0811929	0.0143607	-0.0152293	-0.367388	-0.0158065	0.0829474
-0.0565643	-0.0703015	-0.116337	-0.0189821	-0.0611717	-0.101705	0.0313836	-0.100763	0.0586601	0.00380649	-0.0335913	-0.0392292	-0.00187896	-0.351079	0.00703005	0.0271804
-0.0732304	-0.0837059	-0.146036	0.00931112	-0.0327187	-0.0842519	0.0364597	-0.144793	0.0469701	-0.0161083	-0.0449512	-0.0207877	0.000689635	-0.408637	-0.0266493	0.00624376
0.00194269	-0.0964921	-0.132566	-0.0155807	-0.0576971	-0.095919	0.0600133	-0.096423	0.0841019	0.0189111	-0.0292125	-0.0429076	0.00817344	-0.360147	0.0263099	-0.0207989
-0.0684572	-0.10731	-0.0799803	0.019122	-0.0678658	-0.105823	0.00262468	-0.0644855	0.083071	-0.0198255	-0.0597123	-0.0319608	0.0216665	-0.363062	0.0116622	-0.000144445
-0.0721267	-0.103337	-0.0914448	-0.00337658	-0.091933	-0.0877544	-0.0417127	-0.137285	0.0331088	-0.016959	-0.0473884	-0.0904028	0.0144839	-0.37464	-0.0134353	0.0274738
-0.0881715	-0.0931496	-0.0968215	0.0144911	-0.0814606	-0.108793	-0.0109869	-0.15307	0.0992134	-0.011141	-0.0481182	-0.0367244	-0.0182101	-0.373388	0.0238284	0.0162888
-0.0455558	-0.121057	-0.0581465	0.00473764	-0.0906574	-0.127938	-0.036669	-0.135693	0.117527	0.0061494	-0.0655781	-0.0417561	-0.0230936	-0.39367	0.0111245	-0.0408551
-0.0289116	-0.088216	-0.076467	0.0164828	-0.0571625	-0.135571	-0.0688228	-0.123478	0.0526616	-0.0178883	0.00742851	-0.0381687	-0.00324253	-0.353574	0.0234699	-0.0281465
0.0176951	-0.111488	-0.112183	0.0206055	-0.0536272	-0.108237	-0.056165	-0.172215	0.0657992	0.00154211	-0.0400079	-0.052164	0.0369037	-0.358373	-0.00751424	-0.0140269
0.00326574	-0.104379	-0.11453	0.00413932	-0.0799541	-0.114035	-0.0869393	-0.082563	0.0484615	0.0107109	-0.0640635	-0.0790475	0.00211663	-0.366551	-0.0482245	-0.0162617
-0.0355196	-0.117783	-0.107987	0.00400818	-0.0692265	-0.141925	-0.0835283	-0.151285	0.0326372	0.00029212	-0.101421	-0.0378291	-0.0147219	-0.361862	-0.0758655	0.0567173
0.0447484	-0.121034	-0.123264	0.00797514	-0.0642454	-0.111917	-0.0848808	-0.173878	0.0423095	0.0197226	-0.069654	-0.0495682	-0.0377917	-0.362815	-0.0195357	0.0354196
0.00623349	-0.107767	-0.147743	0.0105733	-0.0476255	-0.0887957	-0.0789911	-0.175663	0.070394	0.0362866	-0.0226857	-0.0656402	0.0107896	-0.374756	-0.0612936	0.0391103
0.00695715	-0.128406	-0.122652	-0.0104089	-0.0644762	-0.120969	-0.092247	-0.178393	0.0247196	0.00699363	-0.0613646	-0.0483035	0.0059061	-0.359152	-0.00632864	-0.0227853
-0.0337433	-0.095542	-0.105555	-0.0139824	-0.0534935	-0.132991	-0.0940738	-0.17687	-0.00289343	-0.0354602	-0.055664	-0.0441502	0.00524017	-0.3592	-0.049479	-0.0221533
-0.00533779	-0.116891	-0.170701	-0.00704028	-0.0696882	-0.143416	-0.0588593	-0.183223	0.0641433	0.00154211	-0.0476225	-0.0828416	-0.012851	-0.357063	-0.0537871	0.0134446
-0.0869069	-0.0763112	-0.162422	-0.0033356	-0.078314	-0.139475	-0.0859478	-0.172985	0.0257066	0.00295571	-0.0533507	-0.0618707	0.033685	-0.364215	-0.0913404	-0.0345347
-0.031068	-0.100212	-0.133277	-0.00831888	-0.0808774	-0.103279	-0.0906143	-0.167963	0.00822635	0.0250563	-0.0368134	-0.0595677	0.0291186	-0.341091	-0.102218	-0.0152685
-0.0871993	-0.0690195	-0.16063	-0.0181871	-0.0543075	-0.116614	-0.100928	-0.177885	-0.0174347	-0.00868031	-0.0659637	-0.0660905	0.0011653	-0.321293	-0.0397185	-0.0479205
-0.0723971	-0.064475	-0.146676	0.0076309	-0.0962702	-0.153746	-0.0985355	-0.182208	0.0256079	-0.0420897	-0.0500322	-0.0881465	0.0364438	-0.31362	-0.0648849	-0.000494329
-0.0717173	-0.0172792	-0.135966	0.0105733	-0.0480629	-0.104391	-0.0831834	-0.1327	-0.00926482	0.0381452	-0.00529464	-0.0272883	-0.0422313	-0.247747	-0.0770511	-0.0275031
-0.0456874	-0.0453243	-0.105242	0.0157451	-0.0785327	-0.107125	-0.098196	-0.186793	0.042463	-0.0320309	-0.0751618	-0.0549616	0.0086174	-0.246637	-0.111371	-0.0607985
-0.0289701	-0.0764714	-0.118413	-0.0262767	-0.0497516	-0.0898133	-0.117994	-0.113678	-0.0302104	0.00388502	0.000337148	-0.0520951	-0.0123119	-0.189411	-0.0809663	-0.0230336
-0.0215215	-0.077536	-0.133249	-0.0195722	-0.0860286	-0.0768919	-0.133567	-0.153508	0.00238134	0.0487276	-0.0560909	-0.0769266	-0.0193359	-0.174297	-0.0562686	-0.0339703
-0.0363822	-0.0817256	-0.133405	0.016827	-0.0574784	-0.142292	-0.129574	-0.118385	-0.0223476	0.0132174	-0.0227821	-0.0909441	-0.0272161	-0.152988	-0.0787399	-0.00241305
-0.0661108	-0.0728198	-0.0929241	-0.0185149	-0.0641482	-0.134328	-0.119001	-0.138493	-0.031296	-0.050892	-0.0423901	-0.0374231	-0.0530764	-0.175323	-0.0555449	-0.0193768
-0.0141606	-0.0509676	-0.0997943	-0.0257604	-0.0723124	-0.123111	-0.131126	-0.1208	0.0110118	0.0169346	-0.0303003	-0.0351201	0.0306724	-0.185096	-0.0475421	-0.0484171
-0.0271354	-0.0812448	-0.122083	-0.017974	-0.0404455	-0.113846	-0.096795	-0.092223	-0.0158336	0.0107109	-0.0258803	-0.0644198	-0.0163075	-0.216935	-0.0771614	-0.00550557
-0.0505484	-0.0931038	-0.0945456	0.00427866	-0.0717414	-0.104486	-0.0998503	-0.120363	-0.0286093	-0.00269869	-0.0130332	-0.073878	0.00218005	-0.19561	-0.0854882	-0.0633154
-0.0802404	-0.0672795	-0.107646	0.0182695	-0.0661893	-0.128577	-0.0988535	-0.125578	0.0160343	0.0248142	0.0220794	-0.110156	-0.0337644	-0.221592	-0.0542559	-0.0533494
-0.0254907	-0.0750177	-0.121713	-0.0348827	-0.0579765	-0.115502	-0.0958951	-0.153263	-0.059589	-0.0555778	-0.0387549	-0.0926836	0.0251547	-0.210504	-0.0732117	-0.018914
-0.047069	-0.0903222	-0.125312	-0.00477813	-0.0604792	-0.108971	-0.0958843	-0.123985	0.0311897	0.0180276	0.0471815	-0.0935866	8.71253e-05	-0.190448	-0.0473628	-0.0403924
-0.0594735	-0.0664553	-0.116863	0.0041803	-0.0824082	-0.13602	-0.109588	-0.098663	0.0423095	0.0312735	-0.00941176	-0.0787104	0.00438397	-0.212235	-0.0602873	-0.0750986
-0.0557529	-0.0707594	-0.149479	-0.00127016	-0.0582681	-0.138623	-0.0918537	-0.0910855	-0.0414837	0.0122488	0.0211018	-0.0687995	-0.0144207	-0.204315	-0.0271525	-0.0750648
-0.0948891	-0.0235522	-0.128128	-0.00772056	-0.0535786	-0.104202	-0.0978188	-0.0777155	0.00620856	0.00105782	0.0325857	-0.0606749	-0.00598554	-0.196821	-0.00711444	-0.0771979
-0.120619	-0.0325495	-0.138953	-0.0202935	-0.0832465	-0.14241	-0.0936858	-0.0875155	0.0164949	-0.0232613	-0.00780071	-0.0470167	-0.001435	-0.165429	-0.065457	-0.0842972
-0.0978057	-0.0571375	-0.100363	0.021212	-0.0588998	-0.129761	-0.0765446	-0.110423	0.0656895	-0.0071031	-0.0571787	-0.069454	0.0178295	-0.142405	-0.0722398	-0.0835523
-0.120027	-0.00991884	-0.140461	-0.00979419	-0.0614511	-0.125205	-0.0817069	-0.0780305	0.0264852	0.0405666	-0.0551683	-0.0841039	0.0108847	-0.137284	-0.019322	-0.0534848
-0.102199	0.00748052	-0.13635	-0.0248424	-0.06054	-0.12162	-0.072223	-0.136585	0.0271541	0.0673923	-0.0427068	-0.0409441	-0.00822117	-0.161077	-0.0258221	-0.064636
-0.13306	0.0308094	-0.125227	-0.0174986	-0.057527	-0.134872	-0.0708327	-0.1334	0.0529687	0.048204	-0.0439047	-0.0416454	0.00679401	-0.15753	-0.0574887	-0.0751438
-0.100854	0.0521465	-0.12901	0.0273345	-0.043993	-0.119513	-0.0670553	-0.0942705	-0.0143861	0.0340615	-0.0641874	-0.0604486	-0.0226497	-0.1405	-0.0439852	-0.0984167
-0.105357	0.0671764	-0.0911461	-0.0131874	-0.0426323	-0.109882	-0.0805268	-0.055123	0.000878962	-0.000597924	-0.0736747	-0.0439706	0.0169257	-0.134906	-0.0535735	-0.098744
-0.129844	0.101139	-0.114146	-0.0267685	-0.0546112	-0.133216	-0.0879954	-0.051763	-0.00920999	-0.0256042	-0.0424176	-0.0705169	0.0551058	-0.118313	-0.0336112	-0.0856064
-0.125371	0.0639369	-0.0895246	0.00190996	-0.0117495	-0.121158	-0.10976	-0.137408	-0.00930869	0.0412145	0.020069	-0.0870614	-0.00516105	-0.146415	-0.0521397	-0.114003
-0.121482	0.0833738	-0.139422	-0.00675341	-0.0474555	-0.106249	-0.121836	-0.073463	-0.000415056	0.0421438	-0.010293	-0.106745	-0.0050025	-0.122854	-0.067325	-0.0942745
-0.0921407	0.0836829	-0.128185	-0.0135153	-0.0406641	-0.144741	-0.12585	-0.077978	-0.0118967	0.00412716	-0.0452817	-0.0887788	0.00336922	-0.167881	-0.0563031	-0.0801437
-0.0830766	0.0328126	-0.119125	0.0046065	-0.0551215	-0.116035	-0.148628	-0.0606705	-0.00905646	0.0223076	-0.0531855	-0.0496568	-0.00336938	-0.197063	-0.0591706	-0.0725479
-0.0777917	0.0719498	-0.103848	-0.0210721	-0.0737217	-0.103906	-0.207913	-0.101778	-0.0271069	0.0201283	-0.0283863	-0.0870392	-0.019875	-0.183222	-0.0896516	-0.0957982
-0.118704	0.0661118	-0.138498	0.00739321	-0.0506263	-0.144634	-0.218453	-0.0609855	-0.0568474	0.0131781	-0.0495916	-0.10178	-0.0209214	-0.179112	-0.0649883	-0.0599859
-0.0836395	0.0349647	-0.152693	-0.024367	0.0120019	-0.112982	-0.212111	-0.084138	0.0273625	0.0198862	-0.0692271	-0.125098	0.00625492	-0.139421	-0.0216587	-0.0899405
-0.0657891	0.0261619	-0.137786	-0.0243424	-0.0357924	-0.135511	-0.213033	-0.132123	0.000363548	0.0139438	-0.0891242	-0.116228	-0.0126131	-0.15603	-0.0469286	-0.0759564
-0.0671634	0.0157796	-0.107945	-0.000360384	0.00672921	-0.138091	-0.211858	-0.041578	-0.0295414	0.00283791	-0.0748313	-0.126092	0.0247742	-0.17877	-0.0039919	-0.083936
-0.0856643	0.0303973	-0.0869358	-0.031801	-0.0406884	-0.134352	-0.221854	-0.0683005	0.0264852	0.00210493	-0.0436018	-0.114174	0.00489135	-0.184953	-0.0646643	-0.0833717
-0.0896846	-0.0201868	-0.0899655	-0.0325632	-0.0381614	-0.120673	-0.226245	-0.039793	-0.0253523	-0.063418	-0.0519324	-0.0962711	-0.00757109	-0.18177	-0.0373473	-0.0845794
-0.132139	0.0271578	-0.103578	-0.0237031	-0.0573083	-0.123939	-0.219176	-0.0396705	-0.0322282	-0.0187391	-0.0373091	-0.122028	-0.00283029	-0.152583	-0.0398563	-0.131893
-0.131087	-0.00166559	-0.10234	-0.0031225	-0.00947759	-0.130601	-0.219946	-0.0682305	0.00533126	-0.0254864	-0.101186	-0.150471	0.0053353	-0.186353	-0.0754381	-0.0971075
-0.150158	-0.00450443	-0.107817	-0.0280799	-0.0516226	-0.129619	-0.222818	-0.052323	-0.0354851	0.031195	-0.0416603	-0.0892512	-0.0251549	-0.177891	-0.121249	-0.0766336
-0.115013	-0.0610295	-0.114872	-0.0303666	-0.0149082	-0.128613	-0.248182	-0.0896855	-0.023181	0.0112802	-0.0618879	-0.120945	0.00530359	-0.191816	-0.00392297	-0.111092
-0.153988	-0.0328127	-0.110661	-0.0308502	-0.0247489	-0.0932803	-0.226579	-0.050293	-0.00176391	-0.0164355	-0.0245584	-0.0995238	-0.00327425	-0.222124	-0.0939252	-0.117017
-0.158359	-0.0574809	-0.11958	-0.0473081	-0.0143494	-0.123738	-0.238871	-0.0298005	-0.0484692	0.0385902	-0.0593543	-0.142278	-0.00241805	-0.235506	-0.0297374	-0.0673335
-0.119735	-0.0559585	-0.131841	-0.0472098	-0.0379185	-0.0915054	-0.233116	-0.041578	-0.0526035	0.00558003	-0.0440011	-0.0742864	-0.0144841	-0.215824	-0.0400011	-0.102897
-0.0906275	-0.0462744	-0.132879	-0.0266456	0.00348542	-0.114958	-0.254487	-0.018863	-0.0573628	-0.00262016	-0.0793065	-0.11099	0.00753922	-0.208414	-0.090913	-0.115211
-0.11733	-0.0233805	-0.125497	-0.0247686	-0.0251255	-0.129607	-0.248748	-0.049908	-0.0948235	-0.0102968	-0.0688966	-0.074872	0.0490014	-0.212493	-0.0734254	-0.0842633
-0.0936757	-0.0159743	-0.149777	-0.0345713	-0.0305805	-0.101705	-0.262424	-0.063208	-0.0802274	0.048204	-0.090515	-0.115392	0.00685743	-0.247195	-0.0876802	-0.1095
-0.107513	-0.0554205	-0.136279	-0.0597991	-0.0356709	-0.120188	-0.246857	-0.0381305	-0.124257	-0.00035578	-0.112519	-0.11363	0.035112	-0.250458	-0.114136	-0.121453
-0.0954593	-0.0553976	-0.160331	-0.0374809	-0.0417211	-0.118034	-0.254805	-0.075808	-0.0158775	0.00825016	-0.130502	-0.122367	-0.0285479	-0.236943	-0.0506646	-0.0983828
-0.13249	-0.0490102	-0.141044	-0.0498817	-0.0517684	-0.131902	-0.274258	-0.096808	-0.00636973	0.0176611	-0.0604696	-0.108847	0.00798318	-0.227302	-0.0331425	-0.102931
-0.0907664	-0.0306607	-0.16238	-0.0553076	-0.0285273	-0.144859	-0.265243	-0.087393	-0.104693	0.00299498	-0.0745284	-0.114398	0.00795146	-0.24649	-0.142824	-0.131859
-0.0245697	-0.0521352	-0.165921	-0.0252194	0.0159382	-0.12685	-0.299018	-0.0115305	-0.0656972	0.0225105	-0.0766765	-0.0969502	-0.0112654	-0.22616	-0.0835512	-0.132276
-0.026726	-0.0723849	-0.176077	-0.0465705	-0.017824	-0.119632	-0.299342	-0.0616155	-0.0488311	-0.0098125	-0.0920985	-0.137357	0.0111226	-0.240622	-0.131658	-0.136294
-0.0299423	-0.052078	-0.182208	-0.0387021	-0.017496	-0.123264	-0.298679	-0.1222	-0.0782097	-0.012679	-0.128202	-0.0856171	-0.0275966	-0.252621	-0.140522	-0.120572
0.0721306	-0.100098	-0.157188	-0.0181461	-0.0186137	-0.0907244	-0.310243	-0.10827	-0.108531	-0.0110232	-0.104477	-0.155212	0.0270257	-0.250615	-0.090265	-0.118157
0.0258162	-0.0697749	-0.124885	-0.0353499	-0.0690807	-0.122105	-0.27339	-0.118315	-0.0740754	-0.0224106	-0.144464	-0.125438	-0.0299274	-0.26163	-0.0957174	-0.123371
0.046722	-0.0585455	-0.14332	-0.0578812	-0.0188688	-0.125193	-0.24725	-0.083123	-0.0281377	0.0146703	-0.14843	-0.0906734	0.0419299	-0.303342	-0.103293	-0.102469
0.0529499	-0.112781	-0.135411	-0.0340467	-0.00565065	-0.148894	-0.209918	-0.1257	-0.0774859	0.0281256	-0.15475	-0.11609	-0.0171637	-0.296827	-0.0981231	-0.0638572
-0.0204689	-0.0988845	-0.110135	-0.0222934	-0.0290375	-0.120105	-0.196549	-0.053163	-0.095646	-0.0305715	-0.139962	-0.129997	0.0094736	-0.350721	-0.102976	-0.0600536
-0.0175596	-0.0745598	-0.142751	-0.0371858	-0.0415996	-0.117324	-0.218841	-0.130985	-0.0733516	-0.0169198	-0.134619	-0.112299	-0.00244976	-0.374914	-0.09001	-0.119466
0.0371463	-0.0832251	-0.12187	-0.0439149	-0.00605157	-0.109941	-0.207498	-0.162223	-0.0986946	0.00133923	-0.132939	-0.111374	0.00966386	-0.336881	-0.10179	-0.0813852
0.0184261	-0.0921308	-0.157984	-0.0137202	-0.0459004	-0.129429	-0.198855	-0.1383	-0.029026	-0.0518213	-0.124402	-0.149162	0.0345095	-0.336212	-0.149249	-0.114398
0.0255165	-0.054665	-0.151868	-0.0318255	-0.040737	-0.0995516	-0.175382	-0.082108	-0.0239486	-0.0391382	-0.119996	-0.128235	-0.00669904	-0.318551	-0.0367682	-0.100911
-0.00404397	-0.104814	-0.147089	-0.000630858	-0.0341401	-0.124637	-0.148224	-0.125438	-0.0363624	0.00978156	-0.135418	-0.122298	-0.020858	-0.341017	-0.0516365	-0.084015
0.0352531	-0.135114	-0.108656	-0.0258013	-0.0342252	-0.123548	-0.111921	-0.143515	-0.0753694	0.0149517	-0.143445	-0.115753	0.0059061	-0.342617	-0.054504	-0.0709113
0.0520873	-0.166261	-0.129665	0.000188761	-0.0360111	-0.124306	-0.0913687	-0.194493	-0.124772	0.0047358	-0.0828728	-0.116792	-0.00113375	-0.329897	-0.0857432	-0.0949743
0.00704487	-0.143482	-0.142509	-0.00227829	-0.0260124	-0.153083	-0.0410122	-0.154838	-0.0570009	0.0218626	-0.133008	-0.114895	-0.00631851	-0.352653	-0.106602	-0.0344331
0.0140549	-0.163892	-0.137815	-0.0082861	-0.0334841	-0.137961	-0.0175556	-0.100185	-0.0167109	-0.0125939	-0.114323	-0.165684	-0.0200335	-0.330734	-0.0858811	-0.0887667
-0.0526755	-0.170302	-0.105327	-0.0184576	-0.0277497	-0.136766	-0.0226532	-0.154978	-0.0674079	0.0157239	-0.0997682	-0.142366	0.00977485	-0.334123	-0.0878938	-0.0727623
-0.00544744	-0.183729	-0.123705	0.00570479	-0.0299001	-0.137251	-0.00453138	-0.088723	-0.108575	-0.037646	-0.0768142	-0.113135	0.0113921	-0.347848	-0.0968341	-0.0809564
-0.0330928	-0.154013	-0.148881	-0.0362433	-0.0349055	-0.121253	-0.00361532	-0.12997	-0.0531298	0.0198011	-0.0613922	-0.125573	0.00831614	-0.350185	-0.0563031	-0.124444
-0.0566666	-0.153246	-0.172251	-0.0340139	-0.0331439	-0.157603	0.0429961	-0.0724305	-0.123007	-0.0219263	-0.0539428	-0.100877	0.0398845	-0.32184	-0.0682556	-0.0958321
-0.0492546	-0.124514	-0.159322	0.0133272	-0.0457181	-0.150456	0.0564245	-0.0788005	-0.0340376	-0.0460884	-0.0700257	-0.124737	0.0304663	-0.322429	-0.08118	-0.178924
-0.10236	-0.13366	-0.165296	-0.0486605	-0.0283207	-0.129536	0.0427213	-0.0927305	-0.0798656	-0.00875885	-0.0954858	-0.112569	-0.0115033	-0.289743	-0.0920228	-0.097288
-0.0775212	-0.0976712	-0.149507	-0.0340303	-0.0335691	-0.130707	0.0599702	-0.11667	-0.0632078	-0.0548906	-0.07826	-0.115347	-0.00739668	-0.288291	-0.0557654	-0.133845
-0.105839	-0.11	-0.164613	-0.0145562	-0.0436893	-0.156763	0.0529165	-0.072938	-0.0404528	-0.0286736	-0.0787557	-0.0629976	-0.0187492	-0.29789	-0.0736046	-0.142818
-0.0880691	-0.0911922	-0.18821	-0.00469617	-0.0233518	-0.149308	0.0815515	-0.135815	-0.0500703	-0.0239878	-0.0474297	-0.0959561	-0.00706372	-0.330318	-0.088466	-0.182569
-0.079356	-0.0885251	-0.132837	-0.0161135	-0.0171072	-0.157721	0.1164	-0.106223	-0.0663113	0.0258613	-0.0986115	-0.0963621	0.00560485	-0.322661	-0.0781678	-0.137886
-0.060877	-0.0941455	-0.144017	-0.0156463	-0.0239714	-0.156727	0.122995	-0.112785	-0.122283	-0.0141711	-0.081785	-0.0684624	-0.0252976	-0.311057	-0.114391	-0.144771
-0.0889317	-0.066089	-0.140958	-0.0228753	-0.0454144	-0.147107	0.105116	-0.10813	-0.0276772	-0.042574	-0.0906389	-0.112525	0.0158317	-0.317214	-0.0679316	-0.116103
-0.0921626	-0.0523527	-0.124046	-0.0199083	0.00926836	-0.143842	0.119487	-0.085538	-0.101129	-0.113189	-0.0874443	-0.107626	-0.0201445	-0.328097	-0.113453	-0.110493
-0.108726	-0.0374373	-0.114786	-0.0547257	-0.0236434	-0.14848	0.10871	-0.109408	-0.12565	-0.0098125	-0.119734	-0.100109	0.0333203	-0.315883	-0.105092	-0.0923558
-0.113639	-0.0561989	-0.12938	-0.0268832	-0.0329131	-0.16875	0.0826993	-0.086063	-0.0846797	-0.0161083	-0.0865906	-0.0647151	-0.0523947	-0.340712	-0.0970133	-0.0949404
-0.105737	-0.0405852	-0.126635	-0.0423658	-0.0350027	-0.131417	0.0299126	-0.097823	-0.0787799	0.00275283	-0.0576744	-0.126407	-0.0196371	-0.292122	-0.115176	-0.0966108
-0.0753649	-0.0635478	-0.134387	-0.0232359	-0.0329009	-0.132163	0.0545223	-0.032478	-0.110801	-0.00189372	-0.110839	-0.108869	-0.02349	-0.30761	-0.115576	-0.0878863
-0.104684	-0.0311758	-0.132381	-0.041497	-0.0312487	-0.119289	0.0531913	-0.067338	-0.119541	0.0119674	-0.119101	-0.0719145	-0.0371099	-0.345369	-0.139523	-0.116137
-0.0657891	-0.0676229	-0.123989	-0.0172937	-0.0492171	-0.129086	0.051995	-0.059708	-0.0983876	0.00529862	-0.103362	-0.0968813	-0.0035755	-0.30862	-0.126846	-0.141904
-0.0216019	-0.00476771	-0.139138	-0.0827239	-0.0469452	-0.130435	0.0710222	-0.0571705	-0.107643	0.0196833	-0.0944255	-0.112186	-0.000182419	-0.299248	-0.108283	-0.136148
-0.0650582	-0.058763	-0.103009	-0.0495949	-0.0572233	-0.162478	0.106113	-0.098278	-0.129576	0.0297814	-0.0948249	-0.0758439	0.0268195	-0.317325	-0.118196	-0.0891617
-0.116628	-0.0181263	-0.101387	-0.0568567	-0.050031	-0.111988	0.0935681	-0.118963	-0.132635	0.00105782	-0.0858333	-0.0746457	0.0656814	-0.330045	-0.155852	-0.1188
-0.126043	0.0104109	-0.11517	-0.0433084	-0.0326701	-0.144788	0.10233	-0.121623	-0.104693	0.0303049	-0.118082	-0.103382	0.0179404	-0.323687	-0.0721708	-0.106441
-0.098639	-0.0106057	-0.116152	-0.0614056	-0.0610138	-0.15332	0.0856469	-0.137023	-0.128128	0.0136624	-0.10339	-0.0607856	-0.0265184	-0.31352	-0.133739	-0.129624
-0.0930032	0.00311924	-0.153646	-0.0244408	-0.082882	-0.121265	0.108699	-0.0917155	-0.157978	0.0492904	-0.0859297	-0.0812152	0.00983827	-0.317588	-0.0896171	-0.107051
-0.12923	-0.0307866	-0.148497	-0.0353909	-0.0666752	-0.149829	0.0762384	-0.098663	-0.169931	4.16465e-06	-0.11844	-0.117107	0.0134058	-0.316967	-0.0915196	-0.0788683
-0.175647	0.00685094	-0.15531	-0.0567174	-0.0548178	-0.130968	0.0717066	-0.170063	-0.131955	-0.0198713	-0.0745009	-0.0915321	-0.000293407	-0.282044	-0.112054	-0.0984618
-0.176919	0.0229911	-0.148981	-0.0632497	-0.0505656	-0.126353	0.0588062	-0.135815	-0.0957447	-0.00201152	-0.142523	-0.0987316	0.00292526	-0.308562	-0.1425	-0.0292074
-0.220236	0.0192136	-0.142708	-0.0543159	-0.0590821	-0.128506	0.047501	-0.135308	-0.17184	0.0158025	-0.163646	-0.0845787	0.0263122	-0.31512	-0.112592	-0.0485864
-0.121241	0.00934638	-0.160929	-0.0284077	-0.0389754	-0.149072	0.0286624	-0.105278	-0.164755	0.0758346	-0.12582	-0.0823225	-0.0245524	-0.296479	-0.156218	-0.0605502
-0.0917606	-0.0127806	-0.139678	-0.0236294	-0.0618399	-0.143025	-0.00676765	-0.067338	-0.103355	0.00352508	-0.151418	-0.130967	-0.0141194	-0.312725	-0.11823	-0.0646698
-0.0980761	-0.0363041	-0.105413	-0.0226622	-0.0440294	-0.140611	-0.0382479	-0.113538	-0.136868	0.0486883	-0.145552	-0.119432	0.00569998	-0.297748	-0.0975854	-0.0888344
-0.0839392	-0.0277303	-0.192862	-0.0330386	-0.0448191	-0.163886	-0.0636336	-0.0952155	-0.142768	-0.00807168	-0.12728	-0.0660905	-0.00232291	-0.314057	-0.13367	-0.106656
-0.0822141	-0.0295504	-0.143618	-0.0437182	-0.0589606	-0.129394	-0.0722876	-0.114938	-0.156947	0.0658544	-0.136492	-0.104511	-0.0224119	-0.292353	-0.122717	-0.116306
-0.0902255	-0.0288063	-0.0975327	-0.0501522	-0.0656183	-0.149782	-0.102361	-0.0710305	-0.112819	-0.00782954	-0.150138	-0.13169	0.0102188	-0.314183	-0.0801392	-0.119466
-0.104304	-0.132401	-0.107447	-0.0356204	-0.0610988	-0.144528	-0.154103	-0.11793	-0.165271	0.0629879	-0.158041	-0.101035	-0.00401946	-0.301495	-0.147415	-0.0898728
-0.149968	-0.0724879	-0.18235	-0.0701673	-0.065436	-0.133689	-0.168108	-0.096563	-0.101074	-0.00629159	-0.156857	-0.11844	0.0259951	-0.285765	-0.136469	-0.119793
-0.182555	-0.084221	-0.159208	-0.0475786	-0.0689714	-0.138955	-0.169988	-0.105593	-0.118204	0.0151153	-0.172238	-0.0624785	-0.00279858	-0.271634	-0.120167	-0.0842972
-0.170632	-0.10399	-0.150048	-0.0402102	-0.0815578	-0.128968	-0.210575	-0.0896855	-0.110801	0.0446896	-0.17758	-0.0521419	0.033796	-0.235143	-0.163607	-0.0868141
-0.169149	-0.0961487	-0.145396	-0.0725688	-0.0602605	-0.153	-0.214892	-0.115393	-0.124509	0.0477982	-0.15906	-0.133474	-0.0151976	-0.195231	-0.167991	-0.0991729
-0.108807	-0.149663	-0.128171	-0.0486605	-0.0481722	-0.131133	-0.199884	-0.145108	-0.116394	-0.0064552	-0.183735	-0.116971	-0.0382991	-0.219271	-0.167522	-0.0425594
-0.13662	-0.116524	-0.132068	-0.0510866	-0.0602119	-0.143025	-0.19816	-0.067338	-0.0693709	0.0172553	-0.159432	-0.116858	0.00455838	-0.253973	-0.134925	-0.101622
-0.15795	-0.0904825	-0.164456	-0.0338992	-0.0709395	-0.153237	-0.209309	-0.0928705	-0.0175334	0.0462603	-0.145222	-0.107265	0.00726968	-0.268261	-0.178296	-0.100798
-0.0962926	-0.104791	-0.128512	-0.0471524	-0.0647071	-0.162916	-0.21397	-0.125315	-0.103662	0.0806841	-0.146282	-0.118305	0.00265572	-0.277808	-0.170217	-0.0675479
-0.116197	-0.113182	-0.140517	-0.060168	-0.0423286	-0.15513	-0.194318	-0.099223	-0.101908	0.0524448	-0.117063	-0.140991	-0.0167197	-0.246863	-0.174381	-0.111092
-0.122885	-0.0887197	-0.13295	-0.0623973	-0.0662257	-0.143924	-0.207331	-0.12297	-0.103509	0.0544212	-0.124898	-0.0946471	-0.016688	-0.259278	-0.161746	-0.0540943
-0.136752	-0.0744224	-0.12352	-0.026957	-0.0678294	-0.164596	-0.188073	-0.0837005	-0.0785715	0.00914021	-0.119197	-0.113721	0.00617565	-0.250989	-0.141963	-0.102469
-0.154339	-0.0893721	-0.152309	-0.0319157	-0.0820073	-0.144114	-0.17923	-0.0703305	-0.102423	0.0203247	-0.144575	-0.126904	-0.0154354	-0.27354	-0.199582	-0.143856
-0.146057	-0.0862586	-0.171654	-0.063094	-0.103657	-0.164064	-0.12016	-0.090193	-0.072891	-0.0203556	-0.123521	-0.135368	0.0086174	-0.244284	-0.217104	-0.112367
-0.120137	-0.0984725	-0.160516	-0.0546437	-0.0699069	-0.171376	-0.143423	-0.078993	-0.0659494	0.00950015	-0.150964	-0.129025	0.0172269	-0.269314	-0.14512	-0.093665
-0.113368	-0.111739	-0.165936	-0.066602	-0.0618035	-0.150574	-0.134397	-0.10127	-0.119333	-0.0092824	-0.138241	-0.150629	-0.00539889	-0.255041	-0.151475	-0.115177
-0.125933	-0.101941	-0.151441	-0.066602	-0.0619614	-0.142256	-0.136509	-0.060163	-0.0588213	-0.00819602	-0.158826	-0.109162	-0.00225949	-0.274003	-0.14128	-0.160922
-0.121672	-0.135206	-0.166988	-0.0580369	-0.0819101	-0.166844	-0.125877	-0.090263	-0.136868	-0.0202313	-0.15504	-0.147265	-0.0355878	-0.247616	-0.155852	-0.0757081
-0.104165	-0.068367	-0.13369	-0.0680937	-0.0455845	-0.167732	-0.0981529	-0.112208	-0.135947	0.0286099	-0.138117	-0.131712	-0.022618	-0.245395	-0.160236	-0.0741054
-0.108916	-0.0781885	-0.146932	-0.0863138	-0.0295599	-0.162064	-0.071932	-0.14803	-0.140597	0.00436931	-0.0919608	-0.119567	-0.0106629	-0.28937	-0.146016	-0.136012
-0.079758	-0.0924285	-0.185223	-0.0502834	-0.0687891	-0.159236	-0.0552166	-0.0802705	-0.0952293	0.0012607	-0.132154	-0.144443	0.00271914	-0.276292	-0.168563	-0.076769
-0.116818	-0.0422565	-0.168211	-0.0369727	-0.0547084	-0.128909	-0.0443531	-0.075808	-0.125288	0.0105931	-0.144106	-0.119589	-0.0567708	-0.285465	-0.187877	-0.111408
-0.0648681	-0.101597	-0.190003	-0.0697247	-0.04098	-0.154976	-0.0254715	-0.0382005	-0.113181	-0.0364746	-0.0971932	-0.151849	0.00455838	-0.320788	-0.172478	-0.0997711
-0.120678	-0.098793	-0.167856	-0.068987	-0.0433977	-0.174784	0.0144796	-0.123723	-0.109771	-0.0532349	-0.14328	-0.17142	0.00998097	-0.319488	-0.155032	-0.147829
-0.139018	-0.117039	-0.18117	-0.0523242	-0.0407978	-0.157343	0.0496726	-0.0955305	-0.0860286	-0.00294084	-0.172761	-0.132842	-0.011091	-0.310146	-0.131906	-0.126249
-0.152987	-0.128532	-0.179107	-0.0641595	-0.0524366	-0.179967	0.0482607	-0.0532855	-0.140904	-0.00423664	-0.17115	-0.166747	-0.0163551	-0.307752	-0.110227	-0.0946244
-0.14366	-0.127033	-0.162365	-0.0800847	-0.0699069	-0.156065	0.0835022	-0.0798155	-0.080699	-0.018209	-0.162957	-0.142142	-0.0264075	-0.309052	-0.11051	-0.079365
-0.135999	-0.132447	-0.202747	-0.0755932	-0.0535664	-0.155154	0.0947105	-0.068038	-0.0870594	0.0152396	-0.148692	-0.154558	-0.02349	-0.324882	-0.119953	-0.0845116
-0.161349	-0.144993	-0.209333	-0.0725688	-0.0721909	-0.142919	0.0809911	-0.062263	-0.0792953	0.0200433	-0.152175	-0.161036	-0.0380296	-0.300184	-0.109366	-0.0865319
-0.144873	-0.125041	-0.184085	-0.0559469	-0.0588634	-0.140883	0.0863635	-0.104578	-0.0537439	0.070298	-0.150592	-0.168689	0.00798318	-0.321766	-0.129073	-0.161497
-0.149778	-0.143482	-0.216061	-0.0828222	-0.0294992	-0.167247	0.0390085	-0.079308	-0.0483705	0.00263503	-0.148292	-0.140833	-0.00468539	-0.336833	-0.140667	-0.19766
-0.116226	-0.107355	-0.155367	-0.0493162	-0.0463499	-0.138434	0.0497103	-0.0823705	-0.0756765	-0.000434313	-0.169085	-0.119365	-0.00631851	-0.356763	-0.119023	-0.170583
-0.115495	-0.108614	-0.206645	-0.0393251	-0.0622408	-0.129914	0.0344713	-0.0980155	-0.0675614	-0.0449954	-0.166248	-0.146497	-0.0109642	-0.345196	-0.152585	-0.119003
-0.143579	-0.0982779	-0.220442	-0.0356368	-0.0609895	-0.154041	0.00404727	-0.0770855	0.00548479	0.00594652	-0.167928	-0.130177	-0.0275649	-0.354658	-0.166123	-0.202242
-0.153425	-0.1066	-0.220669	-0.0687166	-0.0796747	-0.169885	0.0263884	-0.0994155	0.00351086	0.0157632	-0.177112	-0.177197	-0.015705	-0.375114	-0.115935	-0.175267
-0.135758	-0.0755328	-0.225221	-0.0775111	-0.0859314	-0.165649	0.0103843	-0.096493	-0.0597425	-0.0202705	-0.143776	-0.194987	-0.0637155	-0.361363	-0.106526	-0.15801
-0.185815	-0.0816569	-0.24677	-0.0861171	-0.0740254	-0.150669	0.00267857	-0.15097	-0.107851	0.0537799	-0.137222	-0.124601	-0.0361745	-0.344764	-0.129865	-0.175831
-0.143521	-0.0840722	-0.237169	-0.0453329	-0.0701255	-0.166324	-0.00401407	-0.111263	-0.0429312	-0.0241514	-0.138378	-0.181938	-0.0227924	-0.375493	-0.125413	-0.189071
-0.139369	-0.033305	-0.219759	-0.0570698	-0.0490713	-0.168584	0.0113973	-0.083963	-0.0346078	-0.00379161	-0.140843	-0.169501	0.0247742	-0.407095	-0.103224	-0.166283
-0.126182	-0.0635249	-0.219873	-0.0641677	-0.0712311	-0.158834	-0.00260226	-0.106923	-0.0318114	0.00170572	-0.10372	-0.167761	-0.0441656	-0.382539	-0.145051	-0.116735
-0.135107	-0.0517918	-0.258278	-0.0826091	-0.0457546	-0.145593	-0.0101086	-0.106485	0.0060002	0.037013	-0.0771033	-0.185799	-0.000626373	-0.382066	-0.11712	-0.134026
-0.174653	-0.0144289	-0.22744	-0.0955509	-0.0604306	-0.152894	-0.00534506	-0.144793	-0.0714325	-0.044714	-0.0890003	-0.17361	-0.0396151	-0.391996	-0.0976268	-0.084331
-0.171086	-0.0215146	-0.228763	-0.072495	-0.0765402	-0.160609	0.00266779	-0.137793	-0.0456728	0.0508676	-0.0567105	-0.199093	-0.0486369	-0.383076	-0.137689	-0.0762047
-0.119706	-0.0591178	-0.215634	-0.0893136	-0.0700405	-0.170371	-0.00923024	-0.127363	0.00263356	-0.00964889	-0.0970693	-0.179522	-0.0490016	-0.375935	-0.132809	-0.074681
-0.0995308	-0.0585913	-0.2333	-0.0654463	-0.0663836	-0.176417	-0.00980143	-0.130285	-0.0489846	0.0447682	-0.080174	-0.165234	-0.000721506	-0.373819	-0.145657	-0.0949404
-0.0886028	-0.0280966	-0.198893	-0.0779209	-0.0698583	-0.180949	-0.0024406	-0.12773	-0.0652256	0.0157239	-0.0896199	-0.154715	-0.0314654	-0.348111	-0.118988	-0.0827396
-0.123967	-0.0435156	-0.220357	-0.078175	-0.0643062	-0.195267	-0.0131693	-0.139385	-0.0267999	0.0107501	-0.142523	-0.148372	-0.0256622	-0.381992	-0.0985574	-0.0494442
-0.119223	-0.0776848	-0.242034	-0.0893136	-0.0712433	-0.184807	0.00884852	-0.129008	-0.14427	0.00849231	-0.166868	-0.176703	-0.0221106	-0.368067	-0.133091	-0.0664757
-0.101285	-0.0910892	-0.239217	-0.0976245	-0.0650229	-0.165507	0.00198344	-0.093938	-0.0472848	-0.0233857	-0.0861638	-0.164466	-0.0299274	-0.38776	-0.109648	-0.0267243
-0.114231	-0.0849422	-0.236031	-0.0831337	-0.0490227	-0.172347	-0.00974754	-0.0966155	-0.0847346	-0.0196684	-0.144106	-0.13747	-0.0441974	-0.4105	-0.0799944	-0.095121
-0.125422	-0.115048	-0.230441	-0.0682084	-0.0739282	-0.171199	-0.0214624	-0.160438	-0.0515726	-0.0188177	-0.154984	-0.147491	-0.04193	-0.402943	-0.0971581	-0.0278643
-0.128009	-0.116822	-0.22552	-0.0918708	-0.0709517	-0.167247	-0.0224754	-0.096108	-0.117995	-0.0291971	-0.143184	-0.164353	-0.0126924	-0.419236	-0.136	-0.103857
-0.121592	-0.120496	-0.22505	-0.0634792	-0.0738431	-0.167436	-0.0125442	-0.14243	-0.136408	-0.0175677	-0.106791	-0.186161	-0.0231888	-0.447175	-0.132485	-0.061013
-0.130495	-0.136156	-0.238606	-0.0697657	-0.0821166	-0.158609	0.00224209	-0.151985	-0.100351	0.0498597	-0.080229	-0.184827	-0.0552011	-0.452485	-0.194522	-0.0967914
-0.121219	-0.121195	-0.213145	-0.0657905	-0.0846922	-0.177163	-0.0320025	-0.129778	-0.133205	0.0323272	-0.129456	-0.146136	-0.0365708	-0.443849	-0.153088	-0.0673335
-0.183066	-0.121492	-0.256428	-0.0233589	-0.0826998	-0.156432	-0.0469612	-0.097893	-0.0765099	0.0388324	-0.0938748	-0.195122	0.00673059	-0.449443	-0.197679	-0.0733605
-0.159003	-0.128555	-0.207043	-0.0719705	-0.0982019	-0.186096	-0.0392717	-0.103108	-0.105735	0.0235576	-0.0575091	-0.183496	-0.0268514	-0.441639	-0.197858	-0.0601665
-0.144361	-0.0576984	-0.20535	-0.0434641	-0.0704171	-0.17689	-0.0518756	-0.0672155	-0.123632	0.0369737	-0.0347754	-0.197265	-0.0173381	-0.433392	-0.228484	-0.0589927
-0.146218	-0.0563706	-0.207555	-0.0477343	-0.0368251	-0.168785	-0.0340178	-0.065238	-0.0884083	0.0301871	-0.015732	-0.220199	-0.0238389	-0.459116	-0.213692	-0.0509002
-0.15124	-0.0494223	-0.20683	-0.0311698	-0.0571504	-0.170051	-0.0431515	-0.0630855	-0.102632	-0.00447878	-0.0317737	-0.199342	-0.0291822	-0.457932	-0.207191	-0.117593
-0.110612	-0.0727054	-0.22414	-0.0299978	-0.0540645	-0.165614	-0.0367444	-0.0630855	-0.109814	0.00864938	-0.00709846	-0.189163	-0.0363013	-0.491829	-0.24855	-0.0507873
-0.130575	-0.0516201	-0.224937	-0.00326183	-0.0436285	-0.169116	-0.0502159	-0.083578	-0.126582	0.00198713	-0.0426104	-0.194782	-0.00405117	-0.499354	-0.179909	-0.0598392
-0.119055	-0.0181263	-0.182421	-0.027498	-0.0338485	-0.177245	-0.0690168	-0.10253	-0.104079	0.0069151	-0.0648484	-0.182524	0.000451802	-0.478077	-0.203138	-0.0442637
-0.124018	-0.00396643	-0.187997	-0.0506768	-0.0933059	-0.186842	-0.0686072	-0.0508005	-0.134598	-0.000761535	-0.0415226	-0.202548	-0.0399322	-0.507243	-0.202022	-0.0543765
-0.15833	0.00958676	-0.210542	-0.0197526	-0.054186	-0.196793	-0.0836145	-0.0851005	-0.1572	-0.00193299	-0.0715404	-0.172276	-0.0105202	-0.507617	-0.201594	-0.0987101
-0.0947283	1.71126e-05	-0.216971	-0.0150234	-0.0353793	-0.180748	-0.0732684	-0.0802705	-0.113335	-0.0229799	-0.0193948	-0.214287	-0.0347157	-0.527183	-0.179158	-0.128337
-0.129983	0.00791551	-0.200272	-0.0436199	-0.0867576	-0.189043	-0.0706549	-0.110685	-0.118664	-0.00258089	-0.0230437	-0.171713	0.00834785	-0.534756	-0.177034	-0.0995228
-0.136401	0.0326753	-0.223088	-0.0148348	-0.0616941	-0.197408	-0.076453	-0.094778	-0.112304	0.0158025	-0.00324296	-0.201714	-0.0231254	-0.513758	-0.239148	-0.132705
-0.119625	0.0170616	-0.208494	-0.0127202	-0.0203388	-0.186037	-0.0713015	-0.136393	-0.162683	-0.021082	-0.0124686	-0.185415	-0.0217618	-0.528957	-0.153378	-0.133236
-0.188322	0.00168837	-0.22286	-0.0370711	-0.067635	-0.185422	-0.0632671	-0.117108	-0.119903	0.0113195	-0.0334949	-0.191601	-0.00655634	-0.507432	-0.221625	-0.150245
-0.145246	-0.0298709	-0.199561	-0.0305387	-0.0379914	-0.181198	-0.0347776	-0.129585	-0.0813131	0.0180276	0.00347663	-0.16598	-0.000721506	-0.514974	-0.229704	-0.155809
-0.126664	-0.0027416	-0.205805	-0.0308584	-0.0540402	-0.177873	-0.013234	-0.119593	-0.0886166	0.0239241	0.00395856	-0.161125	-0.00276687	-0.522847	-0.1835	-0.140335
-0.139149	-0.00382906	-0.237624	-0.0241293	-0.045791	-0.20807	-0.0130508	-0.155993	-0.0741302	0.00461145	0.00175542	-0.133789	-0.0373795	-0.51549	-0.186588	-0.115279
-0.134135	-0.0310041	-0.206531	-0.0506358	-0.0520235	-0.170288	0.0245186	-0.114308	-0.0791418	0.00392429	0.0213634	-0.156408	0.00509747	-0.520021	-0.11324	-0.173032
-0.163162	-0.0445001	-0.22808	-0.0373498	-0.0439322	-0.20497	0.0476464	-0.159493	0.00190979	-0.0424496	-0.0163654	-0.186114	-0.0137389	-0.5134	-0.255443	-0.149037
-0.105298	-0.02844	-0.229033	-0.0461443	-0.0804279	-0.1847	0.0490044	-0.12927	-0.0512107	0.032	-0.0538189	-0.209253	-0.021191	-0.531541	-0.218393	-0.154037
-0.0979665	-0.0499717	-0.23394	-0.0497998	-0.0627511	-0.190143	0.0528411	-0.118263	-0.0898558	-0.0138897	-0.062177	-0.173157	-0.012185	-0.511411	-0.166336	-0.122277
-0.0747655	-0.032332	-0.223287	-0.0429806	-0.0504563	-0.183789	0.0716634	-0.195963	-0.0434576	-0.0208792	-0.0333296	-0.189522	-0.0225546	-0.495781	-0.173374	-0.123371
-0.0560453	-0.0386736	-0.249615	-0.0356941	-0.0755197	-0.16262	0.069799	-0.150708	0.00961907	0.0233547	-0.0342797	-0.137649	-0.011091	-0.484119	-0.167419	-0.182818
-0.127746	-0.0564621	-0.242958	-0.0358171	-0.0572962	-0.165413	0.0511275	-0.1621	-0.00248768	0.00650934	0.000998091	-0.15616	-0.0461	-0.485903	-0.168673	-0.0970736
-0.143067	-0.0142801	-0.209973	-0.0677904	-0.061196	-0.175636	0.0401455	-0.17407	0.00569315	0.0288521	-0.0178112	-0.204241	0.00543044	-0.505485	-0.195742	-0.143247
-0.177533	-0.0448664	-0.231821	-0.0673642	-0.0346261	-0.173187	0.0254777	-0.166038	0.0310362	0.0365287	-0.0473884	-0.211238	0.0101395	-0.482777	-0.167557	-0.141656
-0.141744	-0.0214459	-0.220826	-0.0798224	-0.0309692	-0.166478	0.0098993	-0.17127	0.0125142	0.0160839	-0.0891242	-0.174919	-0.036444	-0.463858	-0.170934	-0.152333
-0.105386	-0.0230943	-0.227298	-0.0736425	-0.066736	-0.192415	-0.00115811	-0.208493	-0.00264121	0.0763189	-0.0192571	-0.181938	-0.00462197	-0.490618	-0.177896	-0.111803
-0.126365	-0.0355944	-0.252375	-0.0522832	-0.0508572	-0.163851	-0.0206325	-0.188193	-0.027732	0.0490482	-0.0741429	-0.176159	-0.0324326	-0.489771	-0.159478	-0.12959
-0.0977765	-0.0536347	-0.206815	-0.0582664	-0.0406398	-0.192214	-0.02975	-0.180108	-0.034553	0.0268691	-0.0289784	-0.159951	-0.0513482	-0.487003	-0.158044	-0.13959
-0.0915997	-0.0381928	-0.208565	-0.0639054	-0.0495572	-0.163188	0.00538904	-0.20347	-0.0373494	0.0151153	-0.0429408	-0.166181	-0.00595383	-0.480598	-0.169817	-0.137322
-0.108456	-0.0187559	-0.208309	-0.105976	-0.0530197	-0.191705	0.00577163	-0.175015	-0.0998351	0.0701802	-0.0539153	-0.182593	-0.0568025	-0.486392	-0.177793	-0.148326
-0.1395	-0.0277646	-0.245746	-0.0946821	-0.051246	-0.169885	-0.0492514	-0.204923	-0.0467146	0.0317578	-0.00262333	-0.160269	-0.00673075	-0.516284	-0.159699	-0.163766
-0.101848	-0.0496169	-0.177386	-0.0164741	-0.0655332	-0.206342	-0.0376336	-0.167823	-0.0546212	-0.00972742	-0.0359321	-0.182389	-0.0243779	-0.493271	-0.151944	-0.143608
-0.0716954	-0.0704503	-0.214041	-0.063848	-0.0726282	-0.193078	-0.0545107	-0.17813	-0.0850965	0.0733674	-0.0489031	-0.164806	0.0210957	-0.484029	-0.224534	-0.096261
-0.0657307	-0.0132842	-0.238862	-0.0594877	-0.0644276	-0.17624	-0.0570864	-0.2342	-0.0171715	0.0132959	-0.0905425	-0.168529	0.00232275	-0.496012	-0.222239	-0.124297
-0.0757669	-0.00343987	-0.231266	-0.0701837	-0.0637109	-0.195823	-0.043852	-0.228163	-0.0362089	0.0323664	-0.0322418	-0.161871	-0.0348109	-0.519615	-0.246826	-0.140019
-0.0925939	0.023987	-0.2103	-0.0457181	-0.0538094	-0.187552	-0.0427419	-0.200215	-0.0584594	0.0415745	-0.0630996	-0.153271	-0.0230619	-0.52081	-0.204358	-0.129477
-0.0946991	0.0444313	-0.252403	-0.0732655	-0.0673434	-0.179458	-0.0197057	-0.23623	-0.0310877	0.00040992	-0.0460666	-0.198643	0.00374975	-0.525062	-0.237996	-0.152795
-0.110481	-0.0269862	-0.260098	-0.117976	-0.0533842	-0.185481	-0.0127274	-0.152808	-0.0606308	0.0137017	-0.0467	-0.152548	-0.0388065	-0.505296	-0.228732	-0.16994
-0.130604	0.0327668	-0.222519	-0.101928	-0.046362	-0.158881	0.0286732	-0.1551	-0.0893843	0.0332172	-0.0722289	-0.198146	-0.00828459	-0.515016	-0.230097	-0.141622
-0.094107	0.0219266	-0.248477	-0.0793142	-0.0240321	-0.162881	0.0838902	-0.206515	-0.0483705	0.0448467	-0.0745284	-0.160426	-0.0499846	-0.502833	-0.211755	-0.124895
-0.152373	0.019889	-0.260738	-0.0904529	-0.049861	-0.164963	0.0792183	-0.210715	-0.0451574	-0.0422075	-0.0298597	-0.175979	-0.0118045	-0.508495	-0.195708	-0.146475
-0.132381	0.0223845	-0.26492	-0.105435	-0.0460948	-0.178168	0.0946243	-0.134993	-0.0986508	0.0429095	-0.0732891	-0.16081	0.00122872	-0.504806	-0.248515	-0.110708
-0.175727	0.00483628	-0.254537	-0.0963869	-0.104847	-0.160431	0.130529	-0.202823	-0.0531298	-0.00883738	-0.0573439	-0.194285	-0.0304823	-0.508295	-0.240402	-0.127638
-0.148645	0.030134	-0.289058	-0.0960017	-0.0423407	-0.165152	0.0729028	-0.194738	-0.044642	-0.0102117	-0.0730137	-0.200178	0.0294516	-0.505959	-0.237424	-0.0855049
-0.151532	-0.0299625	-0.291789	-0.113673	-0.0635772	-0.148492	0.0963702	-0.206778	-0.030002	-0.0268542	-0.0344725	-0.196453	-0.00191067	-0.507532	-0.222921	-0.0977508
-0.133813	0.0328126	-0.258733	-0.0726098	-0.0834166	-0.178263	0.0762976	-0.20053	-0.0153182	0.0192383	-0.0770069	-0.172005	0.00390831	-0.491429	-0.192041	-0.0785862
-0.114852	0.0151729	-0.253242	-0.104985	-0.0432883	-0.177115	0.0739213	-0.210138	-0.0146931	-0.0100088	-0.0322969	-0.143203	0.0184478	-0.514926	-0.205579	-0.0649181
-0.0879595	0.0405851	-0.280097	-0.101247	-0.0347111	-0.169625	0.081988	-0.175838	-0.0853487	0.00986664	-0.0930761	-0.17968	-0.0550742	-0.517421	-0.208701	-0.076848
-0.117388	0.037483	-0.258377	-0.0856499	-0.067307	-0.170027	0.103273	-0.191185	0.013863	0.00239289	-0.0912035	-0.201239	0.0129935	-0.51069	-0.18989	-0.0694215
-0.150129	0.0438933	-0.270226	-0.0754948	-0.0656183	-0.183801	0.08264	-0.205815	-0.0274688	-0.00370654	-0.0713339	-0.180922	0.0143095	-0.491818	-0.226368	-0.0490153
-0.0851526	0.0654822	-0.248975	-0.0792323	-0.0631277	-0.186321	0.0887076	-0.162678	-0.0850965	0.0193168	-0.064449	-0.151824	-0.0325753	-0.464305	-0.215849	-0.0600198
-0.130626	0.0215145	-0.206133	-0.0720442	-0.0849838	-0.190356	0.0877807	-0.22167	0.0293254	0.0280864	-0.118481	-0.209794	-0.0234266	-0.45619	-0.188346	-0.0366678
-0.13287	0.00965545	-0.23229	-0.0686428	-0.0546355	-0.199609	0.101193	-0.209963	0.00931201	0.0393559	-0.102935	-0.162345	-0.048732	-0.467952	-0.197321	-0.0483833
-0.147651	0.0298822	-0.247453	-0.0779537	-0.0711582	-0.183694	0.105315	-0.215878	0.00181109	0.0118823	-0.12151	-0.173947	-0.0360952	-0.462805	-0.200519	-0.0205844
-0.155501	0.000898528	-0.263868	-0.0669954	-0.0748029	-0.199373	0.0950607	-0.188315	0.000308717	-0.0514613	-0.125366	-0.169456	-0.0149281	-0.492797	-0.229525	-0.0256295
-0.128009	-0.016146	-0.236259	-0.064807	-0.0453415	-0.177719	0.0846554	-0.201615	-0.0206917	0.0644015	-0.0867283	-0.207513	-0.0328765	-0.460574	-0.267581	-0.076769
-0.149675	-0.0095182	-0.261976	-0.0624957	-0.0632249	-0.16901	0.114066	-0.21187	0.00455266	0.0107501	-0.0855717	-0.187108	-0.0299749	-0.461726	-0.257993	-0.0626157
-0.176568	-0.0265742	-0.229702	-0.0927478	-0.0391577	-0.186688	0.119935	-0.183923	0.000977658	0.0507498	-0.123879	-0.171125	-0.0371892	-0.452154	-0.337621	-0.0489815
-0.16621	0.0013793	-0.23936	-0.0849942	-0.0731992	-0.198189	0.115667	-0.219763	-0.056639	0.0218626	-0.0897852	-0.177672	-0.0192249	-0.433971	-0.333065	-0.0406407
-0.1955	0.000383415	-0.219048	-0.0862072	-0.0460948	-0.160987	0.108963	-0.196015	-0.0789883	0.0164896	-0.0816473	-0.175775	-0.0386479	-0.442807	-0.306713	-0.122559
-0.180069	-0.0110177	-0.227525	-0.104444	-0.0602605	-0.171968	0.102082	-0.188	-0.0286641	0.073531	-0.0619567	-0.143924	-0.0325753	-0.453711	-0.315653	-0.0763853
-0.182065	-0.0640171	-0.22835	-0.0875924	-0.0670397	-0.186238	0.111372	-0.24407	-0.063471	0.0926015	-0.0396774	-0.150697	-0.0388065	-0.47933	-0.307285	-0.132457
-0.192342	-0.0423481	-0.241806	-0.099272	-0.04652	-0.211691	0.114196	-0.181123	-0.0562771	0.0435574	-0.0171503	-0.185504	-0.0510469	-0.47642	-0.264996	-0.137536
-0.162643	-0.0157797	-0.253726	-0.116492	-0.079456	-0.162608	0.0861803	-0.224015	-0.0534917	0.0525233	-0.105235	-0.171193	-0.00547816	-0.457111	-0.235377	-0.096577
-0.221069	-0.0176684	-0.235377	-0.0769128	-0.0519141	-0.154728	0.104297	-0.214338	-0.0437647	0.00219001	-0.103858	-0.196588	-0.0489382	-0.468705	-0.279355	-0.0994212
-0.192233	-0.038914	-0.286569	-0.116115	-0.0666266	-0.163022	0.117537	-0.21173	-0.120627	0.0353965	-0.0480769	-0.163947	-0.0424691	-0.459506	-0.279747	-0.132276
-0.218482	-0.00871691	-0.278703	-0.0764128	-0.068449	-0.148859	0.106846	-0.17883	-0.118719	0.0410509	-0.0437395	-0.213856	-0.00858585	-0.482314	-0.246647	-0.126814
-0.206019	-0.0469039	-0.259117	-0.0707902	-0.0740254	-0.167306	0.100848	-0.168523	-0.124147	0.0255799	-0.11245	-0.207808	-0.011535	-0.509795	-0.262232	-0.117051
-0.207101	-0.0986671	-0.23458	-0.105165	-0.0670397	-0.198118	0.108602	-0.201493	-0.0468681	0.0177396	-0.0455433	-0.205505	-0.0275649	-0.454517	-0.255911	-0.0920736
-0.225572	-0.0729686	-0.246742	-0.0873137	-0.0696153	-0.18941	0.123739	-0.221408	-0.102522	0.0112802	-0.0867834	-0.194128	-0.0342084	-0.45538	-0.251714	-0.0748503
-0.20251	-0.0555922	-0.269955	-0.0927806	-0.0862716	-0.18425	0.119439	-0.17953	-0.061201	0.0516791	-0.0999059	-0.188801	-0.0161806	-0.44487	-0.297883	-0.116735
-0.204915	-0.0885937	-0.265162	-0.0983786	-0.0788971	-0.182274	0.132695	-0.20207	-0.0927509	-0.00108221	-0.121483	-0.195865	-0.0700736	-0.423372	-0.256739	-0.0942745
-0.208504	-0.050441	-0.241564	-0.0928379	-0.0579887	-0.176394	0.106964	-0.247115	-0.0858202	0.0555141	-0.153098	-0.186498	-0.0235693	-0.393512	-0.26654	-0.0923558
-0.130254	-0.0742278	-0.248051	-0.0804371	-0.0652052	-0.16359	0.0802313	-0.20347	-0.124454	0.0429881	-0.102137	-0.168418	-0.0369831	-0.403964	-0.2385	-0.149251
-0.168659	-0.0961716	-0.248961	-0.106304	-0.0627511	-0.17101	0.106113	-0.251438	-0.0516275	0.0229948	-0.146048	-0.216386	-0.0484625	-0.412442	-0.2436	-0.14652
-0.121431	-0.0560958	-0.306241	-0.097059	-0.0460583	-0.189812	0.131515	-0.220393	-0.102632	-0.0359445	-0.158936	-0.171284	-0.0326387	-0.407658	-0.219613	-0.0824123
-0.174163	-0.0667415	-0.267765	-0.0864613	-0.0432519	-0.177565	0.121907	-0.22853	-0.0202311	0.0223862	-0.154585	-0.179409	-0.0160379	-0.429614	-0.237783	-0.155064
-0.181443	-0.106943	-0.263597	-0.11373	-0.0781439	-0.178263	0.146888	-0.176678	-0.0780123	0.0211754	-0.140581	-0.17467	-0.0706285	-0.441134	-0.182101	-0.109071
-0.203753	-0.101746	-0.273824	-0.114304	-0.0576363	-0.187031	0.127527	-0.243878	-0.0349149	0.0151938	-0.162351	-0.204806	-0.0493187	-0.433824	-0.209639	-0.157626
-0.267735	-0.115941	-0.288603	-0.106386	-0.0553645	-0.18302	0.140373	-0.226623	-0.0929593	0.0170983	-0.16074	-0.20896	-0.0273271	-0.430956	-0.188849	-0.184172
-0.228269	-0.0703015	-0.280524	-0.117763	-0.0356709	-0.185978	0.127398	-0.15643	-0.0783193	0.00215074	-0.163549	-0.18433	-0.0286114	-0.445102	-0.21811	-0.164296
-0.191078	-0.0260934	-0.307564	-0.142851	-0.0504806	-0.195421	0.114735	-0.161715	-0.0826071	-0.0333987	-0.11888	-0.154263	-0.00520862	-0.441339	-0.199009	-0.188326
-0.193534	-0.0791843	-0.276854	-0.116845	-0.074074	-0.197598	0.123895	-0.177185	-0.101129	0.00864938	-0.188844	-0.194354	-0.0172271	-0.440128	-0.183245	-0.161102
-0.197035	-0.0311415	-0.28627	-0.124656	-0.0431425	-0.19393	0.109217	-0.177185	-0.0145396	-0.00483872	-0.180279	-0.218824	0.00906135	-0.429587	-0.224107	-0.19784
-0.134976	-0.0648299	-0.297607	-0.127696	-0.0705994	-0.182937	0.120452	-0.228023	-0.0591832	0.0166532	-0.148719	-0.192231	-0.0464964	-0.402553	-0.215773	-0.175267
-0.112074	-0.0280966	-0.257253	-0.123885	-0.0864174	-0.181103	0.102885	-0.188	-0.0409683	0.00344	-0.190331	-0.202617	-0.0191615	-0.420604	-0.199837	-0.17161
-0.168798	-0.0411003	-0.267438	-0.0948542	-0.0500918	-0.177009	0.113048	-0.193408	-0.0103505	0.0233547	-0.192892	-0.214671	-0.024045	-0.40629	-0.219433	-0.180335
-0.133945	-0.0376548	-0.254124	-0.120353	-0.0723002	-0.193515	0.123275	-0.149763	0.0166046	0.0257435	-0.192865	-0.231599	-0.0107898	-0.41752	-0.194053	-0.155707
-0.145085	-0.0341978	-0.258548	-0.0950427	-0.0367643	-0.184132	0.110402	-0.148223	-0.0950758	0.0143496	-0.182193	-0.207695	-0.0643497	-0.38035	-0.242773	-0.170504
-0.141394	-0.0346557	-0.261933	-0.114656	-0.0427416	-0.185457	0.105105	-0.147085	-0.0230165	0.0176611	-0.114557	-0.1909	-0.0814261	-0.354726	-0.268477	-0.122626
-0.16235	-0.0057407	-0.280751	-0.107386	-0.0620707	-0.209845	0.103359	-0.191063	-0.0843179	0.0247683	-0.182317	-0.228373	-0.00283029	-0.366736	-0.246323	-0.140053
-0.185464	-0.0341062	-0.275745	-0.108673	-0.0361812	-0.141771	0.120177	-0.1663	-0.000108001	-0.0208399	-0.145759	-0.186296	-0.0392187	-0.320688	-0.261653	-0.0908321
-0.13184	-0.0727741	-0.268078	-0.126475	-0.0503348	-0.172477	0.106161	-0.105208	-0.0297936	-0.0226134	-0.136988	-0.213113	-0.0728958	-0.349811	-0.25993	-0.0941617
-0.127066	-0.0618537	-0.254679	-0.0787487	-0.0582681	-0.214578	0.12175	-0.15937	-0.0235867	0.0263848	-0.164637	-0.194061	-0.0389492	-0.332134	-0.2105	-0.0874913
-0.155333	-0.0446947	-0.229403	-0.112255	-0.0834773	-0.211655	0.153753	-0.164008	-0.0616616	0.0161689	-0.177512	-0.208935	-0.0173698	-0.348511	-0.251314	-0.125606
-0.142739	-0.0537721	-0.291291	-0.119172	-0.0846193	-0.162218	0.138875	-0.160893	-0.0369875	0.00368214	-0.157614	-0.219274	-0.042263	-0.328287	-0.219757	-0.100369
-0.113017	-0.0381699	-0.254295	-0.121262	-0.0691293	-0.1867	0.103397	-0.18863	-0.0514191	-0.0100088	-0.129937	-0.222751	-0.0491443	-0.312267	-0.21028	-0.128416
-0.135568	-0.0926689	-0.263455	-0.127524	-0.0699555	-0.203632	0.125296	-0.16973	-0.116394	0.00243215	-0.168685	-0.221983	0.00512918	-0.282375	-0.260075	-0.0920736
-0.122103	-0.0651733	-0.243186	-0.102993	-0.0695181	-0.196698	0.128567	-0.196523	-0.0952841	0.00178425	-0.158702	-0.240314	0.00584268	-0.287007	-0.235267	-0.0847599
-0.0905471	-0.0911922	-0.254679	-0.0899529	-0.0437379	-0.188877	0.138946	-0.192778	-0.0684387	0.00501721	-0.129648	-0.202774	0.0119788	-0.282202	-0.233619	-0.064952
-0.08429	-0.0787951	-0.28206	-0.118861	-0.0698704	-0.176855	0.123184	-0.20907	-0.0721124	0.0395588	-0.137056	-0.176363	-0.0331936	-0.267872	-0.248694	-0.124511
-0.0738225	-0.0917416	-0.301902	-0.107607	-0.0720329	-0.209064	0.138008	-0.1698	-0.0801288	-0.0262521	-0.143115	-0.22108	-0.0656499	-0.264498	-0.226189	-0.0902565
-0.151773	-0.0762539	-0.299214	-0.0926658	-0.0657519	-0.18496	0.0805007	-0.131808	-0.0968413	-0.048392	-0.149903	-0.213066	-0.0410104	-0.256773	-0.264135	-0.0925702
-0.157036	-0.0595643	-0.271335	-0.151187	-0.0605886	-0.163543	-0.0127113	-0.145493	-0.0538536	-0.0504928	-0.163439	-0.201667	0.00292526	-0.276018	-0.293106	-0.090787
-0.121219	-0.0913868	-0.300082	-0.116304	-0.0804887	-0.171187	-0.109162	-0.193023	-0.0530202	-0.00819602	-0.166771	-0.189455	-0.0554389	-0.267135	-0.30215	-0.126103
-0.14692	-0.0801573	-0.292842	-0.11859	-0.0819951	-0.189244	-0.129331	-0.174893	-0.132942	0.00384575	-0.164788	-0.203743	-0.0380296	-0.258025	-0.346417	-0.127243
-0.108836	-0.113353	-0.288006	-0.127327	-0.0958815	-0.211608	-0.0892079	-0.18023	-0.0620235	-0.00968816	-0.185347	-0.213991	-0.0119155	-0.241848	-0.330983	-0.16266
-0.153447	-0.141376	-0.289897	-0.0980671	-0.107569	-0.212696	0.101716	-0.140138	-0.0310438	0.0406452	-0.169566	-0.245506	-0.0454816	-0.280476	-0.338159	-0.139771
-0.112586	-0.144524	-0.282785	-0.13345	-0.0571382	-0.176819	0.142912	-0.16483	-0.0497632	0.0227134	-0.176782	-0.240494	-0.0227131	-0.290164	-0.34315	-0.153687
-0.0504387	-0.165346	-0.277011	-0.11859	-0.068777	-0.16959	0.153338	-0.138493	-0.0905796	-0.00282304	-0.159749	-0.247041	0.0252498	-0.301868	-0.349036	-0.118755
-0.113719	-0.168242	-0.296896	-0.121803	-0.0878996	-0.201301	0.092097	-0.194563	-0.101491	0.00416643	-0.165615	-0.225913	-0.0513799	-0.244427	-0.324952	-0.142321
-0.117038	-0.154986	-0.263569	-0.123434	-0.0753618	-0.188806	0.0127822	-0.138738	-0.0742837	-0.0104539	-0.187949	-0.219884	-0.0234266	-0.312841	-0.31353	-0.144522
-0.0916801	-0.110812	-0.284179	-0.120025	-0.0922368	-0.208176	-0.0167258	-0.196785	-0.0805455	-0.0144525	-0.169016	-0.177716	-0.0169893	-0.295385	-0.296015	-0.206678
-0.109216	-0.0765744	-0.265916	-0.112238	-0.102333	-0.196781	-0.0687797	-0.152878	-0.119903	-0.0260885	-0.158069	-0.183631	-0.00435242	-0.306731	-0.279789	-0.225944
-0.0912196	-0.104642	-0.303965	-0.122385	-0.0795532	-0.179872	-0.0750251	-0.0935005	-0.0629556	0.0162867	-0.161374	-0.229522	-0.00852242	-0.303816	-0.266685	-0.187084
-0.111343	-0.0844385	-0.301277	-0.12436	-0.0567252	-0.184369	-0.0955664	-0.146438	-0.120474	0.0101481	-0.164761	-0.210156	-0.0156416	-0.296869	-0.311269	-0.218675
-0.134405	-0.075922	-0.300565	-0.117287	-0.0644762	-0.19671	-0.106742	-0.18737	-0.0318663	-0.0118675	-0.156926	-0.201984	-0.012185	-0.31904	-0.276411	-0.219172
-0.170303	-0.079688	-0.286996	-0.125352	-0.0658977	-0.192936	-0.118199	-0.149378	-0.134127	0.0147095	-0.18766	-0.165753	-0.0417873	-0.331471	-0.27404	-0.240357
-0.146649	-0.0642117	-0.247069	-0.111386	-0.0647071	-0.175601	-0.105438	-0.123023	-0.129269	0.00295571	-0.18021	-0.207513	-0.017132	-0.320761	-0.246289	-0.22179
-0.131657	-0.0725108	-0.254636	-0.102977	-0.0922368	-0.191859	-0.112842	-0.175085	-0.0650721	0.00222928	-0.187619	-0.186092	-0.0359683	-0.33767	-0.290735	-0.203946
-0.0907664	-0.0788982	-0.275531	-0.0699706	-0.0574784	-0.200591	-0.143811	-0.118193	-0.0764551	0.0713124	-0.23657	-0.226725	-0.0554706	-0.354974	-0.2446	-0.204511
-0.0828866	-0.0533142	-0.296298	-0.10805	-0.077257	-0.199314	-0.156053	-0.0749855	-0.108893	-0.0224106	-0.188748	-0.239185	-0.0779379	-0.327087	-0.283373	-0.264634
-0.0733401	-0.034049	-0.28014	-0.0932232	-0.054101	-0.212483	-0.200806	-0.133978	-0.0623854	-0.0203098	-0.200135	-0.222616	-0.00425729	-0.356631	-0.314033	-0.230526
-0.166422	-0.0598047	-0.268988	-0.0784618	-0.0796625	-0.196273	-0.245558	-0.091138	-0.0786264	0.0629879	-0.20209	-0.236904	0.00354363	-0.333776	-0.22561	-0.202739
-0.163133	-0.0246854	-0.282259	-0.0878055	-0.0724825	-0.187433	-0.254891	-0.125963	-0.104902	0.0162867	-0.183377	-0.230223	-0.0207153	-0.373877	-0.267829	-0.227862
-0.201377	0.0100675	-0.250326	-0.104501	-0.0763337	-0.205265	-0.232949	-0.064223	-0.0570558	0.000573531	-0.207915	-0.22871	0.0172904	-0.397938	-0.283697	-0.221542
-0.235579	-0.00757222	-0.270937	-0.108673	-0.0824568	-0.200651	-0.246124	-0.12157	-0.0995829	0.0296178	-0.190813	-0.205685	-0.0486052	-0.385034	-0.24855	-0.237806
-0.188702	-0.0104797	-0.283426	-0.109099	-0.0861987	-0.213596	-0.287568	-0.137163	-0.116131	0.0146703	-0.167102	-0.222795	-0.0198433	-0.395201	-0.313572	-0.257998
-0.167204	-0.0211254	-0.28132	-0.0898218	-0.0781439	-0.216885	-0.289163	-0.144023	-0.0393672	0.0240026	-0.157587	-0.187876	-0.0618128	-0.399422	-0.292569	-0.257603
-0.149595	0.00235229	-0.304619	-0.101673	-0.0782532	-0.188368	-0.261929	-0.109215	-0.040091	-0.00120656	-0.195495	-0.204669	-0.0471465	-0.408884	-0.313641	-0.217851
-0.150399	-0.0218351	-0.275289	-0.069028	-0.0826512	-0.224233	-0.282157	-0.123338	-0.0157788	-0.00657955	-0.195206	-0.232435	-0.0442608	-0.403806	-0.285779	-0.248201
-0.168637	-0.0156652	-0.285559	-0.0676101	-0.0871585	-0.181269	-0.265636	-0.094463	-0.025451	-0.0410753	-0.169677	-0.232999	-0.014389	-0.408421	-0.31666	-0.253065
-0.0933248	-0.0232774	-0.315671	-0.100665	-0.0582924	-0.205904	-0.256238	-0.145563	-0.0893843	-0.0217692	-0.170599	-0.17844	-0.0083163	-0.406979	-0.335684	-0.247986
-0.109669	-0.0440422	-0.288987	-0.0951657	-0.0555589	-0.185919	-0.277222	-0.112978	-0.0389505	0.0173797	-0.173629	-0.219161	-0.0517446	-0.428651	-0.254547	-0.24188
-0.0785738	-0.0600221	-0.321446	-0.0685199	-0.0545383	-0.209431	-0.279145	-0.121378	-0.0201214	0.038263	-0.17787	-0.223179	-0.0860401	-0.459432	-0.264459	-0.255334
-0.110049	-0.0656083	-0.32146	-0.105526	-0.0483302	-0.228493	-0.281031	-0.0885305	-0.0674518	-0.0106567	-0.212721	-0.190764	-0.015261	-0.469268	-0.263059	-0.259916
-0.112586	-0.0458852	-0.319113	-0.0965836	-0.047091	-0.233652	-0.303491	-0.130723	-0.0579331	-0.0274236	-0.192273	-0.206499	-0.0422947	-0.491223	-0.26022	-0.237411
-0.120539	-0.0643033	-0.300224	-0.094469	-0.0612325	-0.185765	-0.312786	-0.120293	-0.0252975	0.0305864	-0.219247	-0.198325	-0.0315605	-0.496949	-0.279286	-0.255977
-0.116226	-0.0771811	-0.285545	-0.0756751	-0.067064	-0.210259	-0.328273	-0.122778	-0.0314057	-0.02726	-0.177085	-0.184579	-0.0251549	-0.49405	-0.226113	-0.236057
-0.132973	-0.0665469	-0.283696	-0.0844533	-0.0554981	-0.235392	-0.348529	-0.16133	-0.0487762	-0.00334659	-0.191419	-0.281803	-0.0341608	-0.499502	-0.300971	-0.210188
-0.130656	-0.050773	-0.302429	-0.101059	-0.0782168	-0.20833	-0.356967	-0.15797	0.0196532	0.0033222	-0.215653	-0.206544	-0.0447999	-0.485214	-0.293713	-0.202344
-0.165318	-0.046778	-0.309313	-0.0693395	-0.0788121	-0.209726	-0.361973	-0.181893	-0.0197047	0.0185904	-0.217237	-0.199524	-0.0544559	-0.51921	-0.286716	-0.252321
-0.158118	-0.0620025	-0.30553	-0.109624	-0.0887257	-0.232623	-0.35783	-0.12437	-0.0815763	-0.00572877	-0.216218	-0.229749	-0.0397895	-0.496533	-0.325593	-0.296891
-0.142256	-0.0658944	-0.303055	-0.0979114	-0.0689957	-0.220293	-0.370552	-0.142693	-0.0441265	-0.0190205	-0.180568	-0.213586	-0.00872855	-0.507617	-0.295546	-0.234815
-0.0787346	-0.0614416	-0.306241	-0.0922396	-0.0464714	-0.232611	-0.379018	-0.1677	-0.0194525	0.0401609	-0.204858	-0.222187	-0.0664585	-0.509001	-0.269484	-0.22793
-0.0507384	-0.048186	-0.297237	-0.109566	-0.0371774	-0.244384	-0.389849	-0.139315	-0.0581962	-0.00165158	-0.196059	-0.185912	-0.0429131	-0.49956	-0.251314	-0.252422
-0.0486552	-0.0516888	-0.294022	-0.113878	-0.0737095	-0.22434	-0.363919	-0.17197	-0.0463966	-0.000277246	-0.185608	-0.227153	-0.0253927	-0.52202	-0.265748	-0.211497
-0.054079	-0.063937	-0.298218	-0.097936	-0.084182	-0.233049	-0.351897	-0.161138	-0.102116	0.0155996	-0.195164	-0.23914	-0.0090298	-0.517221	-0.304955	-0.237016
-0.071615	-0.0526618	-0.2894	-0.0992965	-0.0561177	-0.180192	-0.356914	-0.144478	-0.0743824	-0.0113439	-0.160244	-0.202796	-0.0217618	-0.513921	-0.266644	-0.265481
-0.10646	-0.0302028	-0.30469	-0.118517	-0.0157586	-0.239131	-0.36088	-0.131178	-0.0725291	-0.00629159	-0.188156	-0.238643	-0.0187809	-0.527199	-0.244786	-0.250966
-0.0530849	-0.0527304	-0.300181	-0.11673	-0.0428874	-0.24255	-0.367734	-0.161138	-0.0703469	-0.0400675	-0.174124	-0.2616	-0.0112337	-0.505196	-0.273178	-0.264566
-0.0672145	-0.0206675	-0.328857	-0.116959	-0.0505656	-0.228718	-0.360917	-0.166563	-0.0811596	0.0242841	-0.205877	-0.256386	-0.0351438	-0.505054	-0.276659	-0.222366
-0.0562134	-0.034152	-0.331019	-0.123787	-0.0314066	-0.222151	-0.348949	-0.16287	-0.094659	0.00554076	-0.164169	-0.252683	-0.00417801	-0.535503	-0.248233	-0.258709
-0.0970747	0.00248965	-0.317933	-0.105149	-0.0437379	-0.197775	-0.339918	-0.161663	-0.0814776	-0.0572794	-0.164472	-0.228508	-0.0508408	-0.534251	-0.282408	-0.209194
-0.0814027	-0.0322404	-0.345243	-0.145236	-0.0322206	-0.223299	-0.330612	-0.146123	-0.0892856	-0.0496813	-0.188279	-0.220743	-0.0605285	-0.526378	-0.241016	-0.234996
-0.0956713	-0.0280508	-0.34237	-0.119443	-0.038696	-0.235983	-0.340365	-0.160893	-0.0433479	-0.0428554	-0.181725	-0.216971	-0.0619555	-0.524299	-0.286999	-0.258743
-0.0725287	-0.0306836	-0.33412	-0.131106	-0.0549271	-0.231428	-0.344105	-0.15573	-0.0190906	-0.0364746	-0.15307	-0.217921	-0.0350487	-0.522252	-0.248336	-0.271621
-0.108887	-0.000990219	-0.332825	-0.126631	-0.0151998	-0.229463	-0.366926	-0.15573	-0.0652804	-0.0216449	-0.138833	-0.210087	-0.0750681	-0.487376	-0.21933	-0.195888
-0.106029	-0.0523985	-0.329269	-0.129213	-0.0329131	-0.236173	-0.353761	-0.2118	-0.116186	-0.0301723	-0.139328	-0.239952	-0.0595772	-0.538471	-0.215808	-0.20749
-0.0496858	-0.0221442	-0.308773	-0.121328	-0.00973272	-0.240042	-0.345086	-0.191238	-0.0615081	-0.0417625	-0.129483	-0.256588	-0.0463378	-0.520005	-0.251927	-0.278257
-0.0410238	-0.043653	-0.298531	-0.147441	-0.00887014	-0.210495	-0.352398	-0.188578	-0.10863	-0.0178098	-0.101751	-0.267197	-0.00818946	-0.517005	-0.252968	-0.277309
-0.0200376	-0.0568513	-0.304079	-0.135966	-0.0319533	-0.232575	-0.333371	-0.21173	-0.133041	-0.00795388	-0.0958163	-0.229771	-0.0618128	-0.541992	-0.243849	-0.254623
-0.0408922	-0.0727741	-0.282814	-0.1399	-0.0112635	-0.220104	-0.338361	-0.188123	-0.0777491	-0.0417625	-0.09667	-0.252796	-0.0635411	-0.516632	-0.262301	-0.270627
-0.0505191	-0.050029	-0.288191	-0.111173	0.00598812	-0.229345	-0.309413	-0.194423	-0.157156	-0.00375235	-0.0820742	-0.25862	-0.032718	-0.519963	-0.262591	-0.260876
-0.0131884	-0.0838547	-0.304434	-0.130393	-0.0346018	-0.201727	-0.2806	-0.220463	-0.0417469	-0.0606301	-0.106983	-0.237447	-0.0408043	-0.499138	-0.226685	-0.303607
-0.0156445	-0.10043	-0.307108	-0.14599	-0.00336663	-0.216223	-0.154329	-0.226238	-0.0235429	0.00347926	-0.0811516	-0.248756	-0.0487637	-0.539813	-0.231786	-0.275774
0.0102246	-0.0839005	-0.303936	-0.134696	-0.0267657	-0.213584	-0.122633	-0.216578	-0.0805455	0.0322421	-0.0703837	-0.232526	-0.0471465	-0.53464	-0.244386	-0.302331
-0.0332024	-0.107241	-0.336424	-0.138105	-0.0310178	-0.215773	-0.137888	-0.244263	-0.0978173	-0.0413633	-0.0792514	-0.235617	-0.0478283	-0.547439	-0.250238	-0.295729
-0.0927327	-0.0835227	-0.300978	-0.104132	-0.0349298	-0.242006	-0.0867399	-0.212938	-0.129685	0.0496961	-0.0600427	-0.237423	-0.0348743	-0.54766	-0.294898	-0.284363
-0.103873	-0.0602167	-0.293539	-0.107058	-0.0475405	-0.229747	-0.08896	-0.230578	-0.0775955	-0.0100088	-0.0903773	-0.247469	-0.0562634	-0.541013	-0.279968	-0.281451
-0.127578	-0.0655854	-0.322925	-0.108689	-0.0173016	-0.229026	-0.078366	-0.195	-0.12679	-0.0398646	-0.0417291	-0.259567	-0.0891478	-0.529825	-0.2846	-0.280921
-0.167314	-0.0378723	-0.293994	-0.131376	-0.0261096	-0.238184	-0.0439328	-0.189838	-0.0812692	-0.0346945	-0.0371438	-0.289253	-0.0477807	-0.54085	-0.317053	-0.271982
-0.175135	-0.0948209	-0.297308	-0.13454	-0.0279684	-0.215927	-0.0394657	-0.156063	-0.0427777	-0.0402311	-0.0568482	-0.256748	-0.0813944	-0.524789	-0.289984	-0.258314
-0.159412	-0.0802947	-0.323153	-0.103493	-0.023692	-0.209383	-0.0214893	-0.202315	-0.0278307	-0.0458069	-0.0422524	-0.225664	-0.0785087	-0.524689	-0.30359	-0.272049
-0.156656	-0.0656769	-0.290737	-0.0938297	-0.0326336	-0.241083	-0.00893387	-0.189978	-0.050487	-0.00233875	-0.0661014	-0.274129	-0.0692332	-0.548755	-0.285641	-0.259487
-0.144953	-0.115483	-0.317136	-0.103362	0.00423866	-0.207277	0.017966	-0.208563	-0.0279842	0.0083287	-0.0563525	-0.260426	-0.108396	-0.553396	-0.299207	-0.250718
-0.168447	-0.123061	-0.310295	-0.102764	-0.044406	-0.217855	0.0187743	-0.2223	-0.0054376	-0.0524692	-0.0575091	-0.282571	-0.0324801	-0.551349	-0.302653	-0.24565
-0.170062	-0.127948	-0.296853	-0.0739048	-0.0141671	-0.24752	0.0327901	-0.203838	-0.0323269	-0.0455583	-0.0547414	-0.237265	-0.0719128	-0.542034	-0.300427	-0.229781
-0.162482	-0.181074	-0.28361	-0.119271	-0.0160016	-0.205786	0.0192593	-0.173038	-0.0427777	-0.0230192	-0.0745009	-0.249388	-0.0799991	-0.563964	-0.302694	-0.208416
-0.17314	-0.16665	-0.324391	-0.0925839	-0.0309085	-0.220861	0.0173841	-0.170185	-0.0510572	-0.00771174	-0.0333572	-0.23388	-0.0635728	-0.569326	-0.29971	-0.205752
-0.182715	-0.157699	-0.29058	-0.108902	-0.0392792	-0.263743	0.00868686	-0.208423	-0.0326887	0.0156388	-0.0546313	-0.258529	-0.0427069	-0.546718	-0.292672	-0.185843
-0.168527	-0.166937	-0.314832	-0.101132	-0.0177997	-0.226564	0.015983	-0.120415	-0.0859189	-0.00479946	-0.10204	-0.256792	-0.0835032	-0.532604	-0.327682	-0.191915
-0.187949	-0.157184	-0.32742	-0.0897808	-0.0099514	-0.227748	0.038405	-0.203523	0.0143236	-0.0178883	-0.0888351	-0.263315	-0.0347792	-0.549807	-0.259751	-0.212242
-0.20653	-0.156623	-0.300352	-0.106927	-0.00862716	-0.232552	0.0153364	-0.221408	0.0243577	-0.0525477	-0.129125	-0.269299	-0.0679489	-0.54075	-0.273502	-0.158303
-0.17743	-0.152685	-0.320166	-0.0935756	-0.0365942	-0.236433	-0.00182091	-0.17477	-0.0381719	-0.0464483	-0.102109	-0.263585	-0.0732605	-0.547544	-0.323911	-0.190741
-0.192583	-0.164304	-0.312058	-0.102837	-0.0407492	-0.226896	0.0126583	-0.241008	-0.0610365	-0.0119525	-0.14368	-0.272502	-0.0751949	-0.554796	-0.306679	-0.220583
-0.234344	-0.182962	-0.316596	-0.101755	-0.031358	-0.240006	0.0147652	-0.23147	-0.0237951	-0.0386931	-0.0860674	-0.28914	-0.0818701	-0.549376	-0.311917	-0.170222
-0.167445	-0.182688	-0.330009	-0.0929773	-0.036412	-0.22912	-0.0254607	-0.185585	-0.0055363	-0.0161541	-0.133242	-0.245619	-0.0566915	-0.551881	-0.299999	-0.271767
-0.21395	-0.178235	-0.306852	-0.120951	-0.0472611	-0.207656	-0.0363133	-0.1614	-0.0562333	0.00800802	-0.120891	-0.251443	-0.0576428	-0.530441	-0.32398	-0.149421
-0.144873	-0.177754	-0.306739	-0.102337	-0.0268264	-0.223713	-0.00373387	-0.2034	-0.0382815	-0.065761	-0.0925253	-0.266949	-0.0667598	-0.526188	-0.351263	-0.166396
-0.184411	-0.214293	-0.321859	-0.114656	-0.0245667	-0.222186	-0.00813096	-0.156763	-0.0789883	-0.0236278	-0.0701221	-0.27607	-0.0316873	-0.537682	-0.355109	-0.181475
-0.195961	-0.198885	-0.295985	-0.127721	-0.0469087	-0.231901	0.0071565	-0.178008	0.014839	0.0370523	-0.0644215	-0.262978	-0.0815371	-0.508327	-0.367137	-0.214025
-0.19917	-0.21981	-0.33348	-0.139056	-0.0209341	-0.217252	0.00584707	-0.195315	-0.0352329	-0.0104146	-0.0677537	-0.296003	-0.0804748	-0.48034	-0.412659	-0.189917
-0.176751	-0.190826	-0.320735	-0.139441	-0.0330103	-0.2235	-0.00903086	-0.228215	-0.0388956	-0.0218477	-0.0309888	-0.264309	-0.0437534	-0.414778	-0.388313	-0.215583
-0.169229	-0.218871	-0.301661	-0.109247	-0.0537851	-0.218696	-0.00997387	-0.182715	-0.0204833	-0.0138897	-0.0841809	-0.267943	-0.0813627	-0.334355	-0.36986	-0.191734
-0.216969	-0.230731	-0.34126	-0.10737	-0.045463	-0.233688	-0.0216941	-0.186863	-0.0186739	0.0157632	-0.0519324	-0.287152	-0.0971548	-0.292801	-0.346134	-0.190662
-0.192342	-0.2225	-0.325998	-0.118779	-0.00888229	-0.231013	-0.0187519	-0.198063	-0.0170728	-0.00718164	-0.0875132	-0.247762	-0.107826	-0.27896	-0.331411	-0.203235
-0.205427	-0.261374	-0.318914	-0.131827	-0.0268871	-0.227819	-0.00524267	-0.151285	-0.0846797	0.0209726	-0.0648208	-0.264129	-0.054662	-0.225439	-0.349794	-0.192231
-0.212356	-0.274778	-0.333551	-0.110083	-0.0325121	-0.231428	-0.0735378	-0.158093	0.00108732	-0.0317429	-0.038328	-0.277807	-0.114834	-0.201562	-0.341571	-0.146656
-0.208175	-0.284772	-0.319256	-0.106288	-0.0548785	-0.220754	-0.0662255	-0.192585	-0.0539523	-0.0221684	-0.0604696	-0.267175	-0.109078	-0.163082	-0.349222	-0.17661
-0.186867	-0.300797	-0.348714	-0.086658	-0.0262797	-0.226233	-0.106123	-0.179793	-0.0822014	-0.00277722	-0.0507482	-0.296116	-0.0747827	-0.121081	-0.315074	-0.136825
-0.141905	-0.279861	-0.351288	-0.100051	-0.0196099	-0.225156	-0.132796	-0.165723	-0.0257142	-0.000676458	-0.0507482	-0.286249	-0.0989465	-0.13759	-0.350187	-0.19731
-0.220097	-0.284463	-0.352511	-0.10328	-0.0427052	-0.20349	-0.160213	-0.183223	-0.0148466	0.029945	-0.0895236	-0.266996	-0.0904479	-0.123259	-0.303873	-0.174229
-0.205047	-0.294639	-0.335329	-0.0903217	-0.0511852	-0.216365	-0.187038	-0.19213	-0.0843179	-0.0264158	-0.0722289	-0.27029	-0.086373	-0.0889155	-0.345879	-0.173281
-0.19944	-0.297695	-0.325301	-0.125483	-0.0562392	-0.222896	-0.213625	-0.221863	-0.0981792	0.00291644	-0.122075	-0.239974	-0.0799991	-0.0761536	-0.323373	-0.138066
-0.19936	-0.314133	-0.338472	-0.102452	-0.0520964	-0.198686	-0.218055	-0.191885	-0.0982889	0.0346308	-0.0723253	-0.270583	-0.0946496	-0.0654125	-0.329439	-0.13345
-0.169901	-0.300145	-0.329013	-0.0920429	-0.0313094	-0.238255	-0.220884	-0.158863	-0.0629008	0.00404863	-0.0809313	-0.259457	-0.0942374	-0.0398466	-0.383722	-0.151554
-0.183709	-0.289396	-0.351629	-0.0706099	-0.0496058	-0.192107	-0.20163	-0.18737	-0.0877832	0.0210576	-0.0873755	-0.243926	-0.0618763	-0.0157279	-0.333996	-0.146125
-0.181341	-0.320223	-0.342853	-0.113861	-0.034541	-0.18741	-0.227215	-0.151338	-0.0332151	0.0315157	-0.0390853	-0.29896	-0.0621934	-0.0234535	-0.333279	-0.158258
-0.19504	-0.291937	-0.325386	-0.0819698	-0.0327308	-0.182842	-0.220641	-0.168978	-0.0210535	0.0418624	-0.0638982	-0.276973	-0.103243	-0.0565292	-0.312634	-0.112401
-0.208745	-0.293677	-0.302116	-0.0961492	-0.0521936	-0.209916	-0.231639	-0.181123	-0.0393672	0.0456189	-0.0072637	-0.280472	-0.0992794	-0.0316316	-0.307719	-0.0897938
-0.195822	-0.321894	-0.289969	-0.094428	-0.0401053	-0.204461	-0.246571	-0.15993	-0.0840108	0.0330536	-0.0762772	-0.298033	-0.0707871	-0.0131176	-0.338517	-0.103676
-0.155874	-0.283364	-0.298859	-0.103665	-0.0376026	-0.201455	-0.253765	-0.189593	-0.0486775	0.0161689	-0.0891655	-0.288486	-0.0876573	-0.0377415	-0.295691	-0.154646
-0.123214	-0.311683	-0.314107	-0.0769455	-0.0464349	-0.229061	-0.264407	-0.183415	-0.0331055	0.0633937	-0.0723941	-0.329141	-0.0845179	-0.0322947	-0.370294	-0.181159
-0.108244	-0.306578	-0.319213	-0.094346	-0.0518291	-0.219808	-0.274053	-0.144915	-0.116701	0.0082109	-0.0988456	-0.313767	-0.0696772	-0.025948	-0.347926	-0.183461
-0.117981	-0.299126	-0.312969	-0.0899693	-0.0462527	-0.24158	-0.260883	-0.158408	-0.0304736	0.0843555	-0.0913962	-0.283813	-0.124046	0.0181109	-0.333637	-0.14187
-0.123024	-0.312439	-0.328971	-0.0788716	-0.0352943	-0.201041	-0.264095	-0.119278	-0.0435015	0.044886	-0.094398	-0.284332	-0.0852314	-0.000745169	-0.350401	-0.156102
-0.107462	-0.298107	-0.356978	-0.0581763	-0.038939	-0.217098	-0.287616	-0.126015	-0.0584046	0.035318	-0.119899	-0.300178	-0.0537107	-0.0676912	-0.360527	-0.194217
-0.116687	-0.287244	-0.350435	-0.0853548	-0.0327187	-0.208034	-0.284006	-0.146	-0.0504321	0.0206912	-0.0662666	-0.27731	-0.0862462	-0.0468249	-0.335615	-0.168416
-0.123075	-0.281795	-0.292742	-0.0528324	-0.0453901	-0.20394	-0.286517	-0.176363	-0.069009	0.0194412	-0.084415	-0.291419	-0.0941422	-0.0809689	-0.359486	-0.19205
-0.0103011	-0.29876	-0.308744	-0.0930347	-0.0373232	-0.222009	-0.298625	-0.124878	-0.0930031	0.0168954	-0.117848	-0.327989	-0.0875305	-0.112966	-0.361823	-0.226937
-0.100686	-0.269719	-0.265603	-0.0811338	-0.077743	-0.22505	-0.302505	-0.148485	-0.0859738	0.0355143	-0.11004	-0.278688	-0.090543	-0.103561	-0.396715	-0.150843
-0.0473394	-0.251644	-0.265048	-0.0785356	-0.0519384	-0.222813	-0.315303	-0.037378	-0.0915556	-0.0239092	-0.0875407	-0.303655	-0.0866109	-0.06466	-0.404367	-0.144816
-0.0599341	-0.272523	-0.290623	-0.0615121	-0.0779374	-0.222518	-0.32414	-0.049523	-0.0684387	0.0491726	-0.0843875	-0.289997	-0.101547	-0.0887839	-0.356074	-0.165572
-0.0583405	-0.266834	-0.267694	-0.0646103	-0.0158558	-0.228978	-0.336712	-0.042138	-0.0767621	0.0224254	-0.0874856	-0.289886	-0.0797771	-0.0744801	-0.397832	-0.145978
-0.0328004	-0.267201	-0.310565	-0.0671019	-0.0320626	-0.214294	-0.338759	-0.048578	-0.136671	0.0364044	-0.128684	-0.299772	-0.0917639	-0.0825845	-0.399734	-0.193754
-0.0585014	-0.246939	-0.294933	-0.10964	-0.0173988	-0.248041	-0.347893	-0.034508	-0.108531	-0.00609526	-0.137456	-0.315145	-0.0989465	-0.0874577	-0.364656	-0.164014
-0.127929	-0.248393	-0.296568	-0.0649955	-0.0458396	-0.225369	-0.340742	-0.0560155	-0.148514	-0.00548662	-0.115355	-0.310404	-0.142169	-0.113024	-0.38286	-0.174195
-0.143952	-0.280639	-0.291519	-0.09092	-0.0350027	-0.215702	-0.375084	-0.014593	-0.116438	0.0550299	-0.109848	-0.289342	-0.0854217	-0.0627602	-0.345631	-0.186554
-0.153447	-0.285207	-0.3157	-0.0458656	-0.0286366	-0.212128	-0.348723	-0.053408	-0.107698	-0.0105782	-0.125655	-0.286522	-0.099549	-0.0889734	-0.38641	-0.160041
-0.146759	-0.27938	-0.321404	-0.0738064	-0.0480022	-0.216447	-0.336836	-0.021138	-0.11737	0.0363651	-0.117035	-0.301893	-0.110965	-0.11155	-0.368998	-0.205504
-0.183607	-0.235378	-0.301106	-0.0933379	-0.00907667	-0.214377	-0.337348	-0.058693	-0.109354	0.0216205	-0.150399	-0.298913	-0.105209	-0.124396	-0.329226	-0.162062
-0.185815	-0.282768	-0.293126	-0.0959361	-0.0126971	-0.209123	-0.339277	-0.0255305	-0.127667	0.0117645	-0.149504	-0.307604	-0.0896234	-0.0973199	-0.306927	-0.201632
-0.181151	-0.260206	-0.314078	-0.115935	-0.0260853	-0.22415	-0.350679	-0.031638	-0.125858	0.029657	-0.157807	-0.288599	-0.0825836	-0.121123	-0.344232	-0.200673
-0.140122	-0.259291	-0.305032	-0.10805	-0.0213229	-0.205206	-0.344611	-0.054423	-0.133359	0.0339437	-0.141807	-0.284468	-0.0652059	-0.175365	-0.324876	-0.200177
-0.16197	-0.258638	-0.30277	-0.136163	-0.0499217	-0.215726	-0.346848	-0.037308	-0.187357	0.055717	-0.122571	-0.276136	-0.125203	-0.212072	-0.311056	-0.190662
-0.150991	-0.282929	-0.329611	-0.131319	-0.00594222	-0.238409	-0.345005	-0.051378	-0.155237	0.0557956	-0.107507	-0.276001	-0.0991843	-0.197931	-0.246289	-0.21424
-0.134003	-0.293151	-0.309498	-0.108362	-0.0142886	-0.230505	-0.304989	-0.038708	-0.202468	0.070141	-0.140747	-0.247063	-0.0862462	-0.218882	-0.247364	-0.205436
-0.138155	-0.270303	-0.282458	-0.129114	-0.0329252	-0.225334	-0.297138	-0.074093	-0.174066	0.0505469	-0.107878	-0.293835	-0.136048	-0.213803	-0.313854	-0.207027
-0.143199	-0.285733	-0.297834	-0.146416	-0.0366428	-0.228114	-0.297822	-0.0641705	-0.161345	0.0630272	-0.129483	-0.298033	-0.0968853	-0.220324	-0.263059	-0.244296
