# Supplementary material for: Sensory experience controls dendritic structure and behavior by distinct pathways involving degenerins
Source: eLife. 2025 Jan 10;14:e83973. doi: 10.7554/eLife.83973 (PMC11756856; doi:10.7554/eLife.83973)
Supplement: Figure 6—figure supplement 2—source data 1. [file elife-83973-fig6-figsupp2-data1.xlsx]

## Sheet: Raw data
1				2				3				4				5				6				7				8				9				10				11				12				13
Frame	Area	GCaMP		Frame	Area	GCaMP		Frame	Area	GCaMP		Frame	Area	GCaMP		Frame	Area	GCaMP		Frame	Area	GCaMP		Frame	Area	GCaMP		Frame	Area	GCaMP		Frame	Area	GCaMP		Frame	Area	GCaMP		Frame	Area	GCaMP		Frame	Area	GCaMP		Frame	Area
1	90.872	39.22		1	53.193	387.583		1	92.645	478.703		1	114.366	622.523		1	115.252	69.142		1	145.395	77.171		1	167.116	131.374		1	70.038	300.228		1	290.79	637.639		1	116.582	342.863		1	273.059	54.766		1	75.357	266.712		1	69.151
2	90.872	36.766		2	53.193	361.925		2	92.645	469.488		2	114.366	604.039		2	115.252	66.973		2	145.395	73.073		2	167.116	134.91		2	70.038	311.981		2	290.79	638.428		2	116.582	335.194		2	273.059	56.977		2	75.357	257.341		2	69.151
3	90.872	36.351		3	53.193	364.242		3	92.645	467.344		3	114.366	609.109		3	115.252	65.708		3	145.395	78.466		3	167.116	129.594		3	70.038	301.69		3	290.79	626.085		3	116.582	339.555		3	273.059	54.367		3	75.357	263.276		3	69.151
4	90.872	37.166		4	53.193	373.233		4	92.645	462.153		4	114.366	600.008		4	115.252	64.577		4	145.395	71.82		4	167.116	130.255		4	70.038	289.873		4	290.79	637.239		4	116.582	340.259		4	273.059	55.498		4	75.357	257.112		4	69.151
5	90.872	36.551		5	53.193	369.475		5	92.645	473.158		5	114.366	597.973		5	115.252	63.881		5	145.395	75.03		5	167.116	128.897		5	70.038	297.418		5	290.79	627.276		5	116.582	340.665		5	273.059	54.568		5	75.357	263.159		5	69.151
6	90.872	40.512		6	53.193	362.517		6	92.645	469.416		6	114.366	582.027		6	115.252	65.727		6	145.395	72.357		6	167.116	133.003		6	70.038	289.266		6	290.79	631.532		6	116.582	336.24		6	273.059	54.099		6	75.357	252.094		6	69.151
7	90.872	34.161		7	53.193	369.075		7	92.645	461.679		7	114.366	577.798		7	115.252	66.235		7	145.395	76.04		7	167.116	129.408		7	70.038	296.184		7	290.79	615.415		7	116.582	329.548		7	273.059	53.635		7	75.357	248.724		7	69.151
8	90.872	37.385		8	53.193	356.875		8	92.645	471.598		8	114.366	578.624		8	115.252	64.254		8	145.395	72.777		8	167.116	131.199		8	70.038	286.139		8	290.79	627.793		8	116.582	330.395		8	273.059	52.68		8	75.357	239.506		8	69.151
9	90.872	35.873		9	53.193	367.192		9	92.645	457.244		9	114.366	568.632		9	115.252	65.762		9	145.395	74.671		9	167.116	130.621		9	70.038	291.437		9	290.79	623.986		9	116.582	325.624		9	273.059	53.411		9	75.357	247.612		9	69.151
10	90.872	39.19		10	53.193	351.908		10	92.645	465.1		10	114.366	581.86		10	115.252	67.973		10	145.395	74.954		10	167.116	131.915		10	70.038	292.259		10	290.79	617.439		10	116.582	330.171		10	273.059	51.271		10	75.357	243.512		10	69.151
11	90.872	33.751		11	53.193	364.183		11	92.645	452.526		11	114.366	575.744		11	115.252	66.273		11	145.395	70.796		11	167.116	131.599		11	70.038	297.614		11	290.79	616.788		11	116.582	322.445		11	273.059	53.029		11	75.357	251.094		11	69.151
12	90.872	37.322		12	53.193	367.95		12	92.645	454.029		12	114.366	573.081		12	115.252	67.431		12	145.395	76.25		12	167.116	128.69		12	70.038	290.551		12	290.79	616.151		12	116.582	326.962		12	273.059	51.226		12	75.357	240.088		12	69.151
13	90.872	34.6		13	53.193	353.708		13	92.645	452.627		13	114.366	569.155		13	115.252	65.504		13	145.395	76.143		13	167.116	126.557		13	70.038	292.101		13	290.79	614.401		13	116.582	329.962		13	273.059	50.955		13	75.357	256.171		13	69.151
14	90.872	37.766		14	53.193	345.192		14	92.645	442.957		14	114.366	562.329		14	115.252	62.288		14	145.395	75.308		14	167.116	128.955		14	70.038	299.785		14	290.79	602.27		14	116.582	329.84		14	273.059	50.891		14	75.357	245.641		14	69.151
15	90.872	37.576		15	53.193	348.142		15	92.645	451.885		15	114.366	551.085		15	115.252	66.008		15	145.395	76.936		15	167.116	125.615		15	70.038	283.88		15	290.79	604.377		15	116.582	324.586		15	273.059	52.024		15	75.357	242.1		15	69.151
16	90.872	35.673		16	53.193	354.842		16	92.645	448.512		16	114.366	552.868		16	115.252	66.765		16	145.395	73.012		16	167.116	125.387		16	70.038	290.411		16	290.79	592.642		16	116.582	315.3		16	273.059	48.024		16	75.357	252.059		16	69.151
17	90.872	36.595		17	53.193	341.425		17	92.645	431.957		17	114.366	558.55		17	115.252	62.723		17	145.395	76.146		17	167.116	130.931		17	70.038	289.854		17	290.79	596.387		17	116.582	319.392		17	273.059	53.511		17	75.357	242.906		17	69.151
18	90.872	35.322		18	53.193	353.983		18	92.645	425.344		18	114.366	542.643		18	115.252	61.827		18	145.395	70.774		18	167.116	126.218		18	70.038	281.013		18	290.79	590.587		18	116.582	316.894		18	273.059	49.661		18	75.357	242.676		18	69.151
19	90.872	37.829		19	53.193	347.05		19	92.645	443.565		19	114.366	557.876		19	115.252	64.077		19	145.395	71.021		19	167.116	130.57		19	70.038	285.43		19	290.79	593.445		19	116.582	320.646		19	273.059	51.256		19	75.357	240.441		19	69.151
20	90.872	34.385		20	53.193	346.967		20	92.645	436.029		20	114.366	543.279		20	115.252	65.719		20	145.395	69.997		20	167.116	125.265		20	70.038	291.038		20	290.79	590.791		20	116.582	319.038		20	273.059	50.281		20	75.357	237.082		20	69.151
21	90.872	35.322		21	53.193	338.458		21	92.645	432.675		21	114.366	536.903		21	115.252	65.765		21	145.395	73.149		21	167.116	127.249		21	70.038	287.228		21	290.79	591.969		21	116.582	314.62		21	273.059	49.224		21	75.357	254.1		21	69.151
22	90.872	34.18		22	53.193	331.1		22	92.645	432.914		22	114.366	547.795		22	115.252	63.904		22	145.395	72.274		22	167.116	131.3		22	70.038	285.196		22	290.79	598.834		22	116.582	320.677		22	273.059	49.636		22	75.357	244.976		22	69.151
23	90.872	35.693		23	53.193	360.692		23	92.645	420.995		23	114.366	548.779		23	115.252	64.146		23	145.395	73.576		23	167.116	124.385		23	70.038	288.133		23	290.79	601.52		23	116.582	322.065		23	273.059	48.692		23	75.357	259.224		23	69.151
24	90.872	36.083		24	53.193	348.158		24	92.645	420.967		24	114.366	542.504		24	115.252	62.904		24	145.395	69.973		24	167.116	120.626		24	70.038	289.62		24	290.79	600.8		24	116.582	327.768		24	273.059	47.989		24	75.357	243.818		24	69.151
25	90.872	36.063		25	53.193	359.2		25	92.645	420.234		25	114.366	552.752		25	115.252	64.969		25	145.395	70.823		25	167.116	126.507		25	70.038	294.424		25	290.79	609.317		25	116.582	312.137		25	273.059	48.187		25	75.357	238.865		25	69.151
26	90.872	36.537		26	53.193	346.008		26	92.645	424.077		26	114.366	542.132		26	115.252	64.462		26	145.395	75.552		26	167.116	127.387		26	70.038	293.089		26	290.79	610.649		26	116.582	312.445		26	273.059	49.784		26	75.357	244.141		26	69.151
27	90.872	35.259		27	53.193	368.983		27	92.645	419.818		27	114.366	535.171		27	115.252	62.519		27	145.395	72.546		27	167.116	127.682		27	70.038	299.873		27	290.79	604.873		27	116.582	320.635		27	273.059	50.737		27	75.357	244.2		27	69.151
28	90.872	35.81		28	53.193	362.342		28	92.645	422.665		28	114.366	532.058		28	115.252	62.877		28	145.395	71.976		28	167.116	124.594		28	70.038	306.234		28	290.79	599.262		28	116.582	310.331		28	273.059	49.552		28	75.357	244.465		28	69.151
29	90.872	35.102		29	53.193	356.217		29	92.645	416.33		29	114.366	532.318		29	115.252	67.142		29	145.395	71.515		29	167.116	121.408		29	70.038	298.013		29	290.79	596.505		29	116.582	321.011		29	273.059	49.867		29	75.357	241.265		29	69.151
30	90.872	36.063		30	53.193	346.017		30	92.645	424.928		30	114.366	545.248		30	115.252	64.027		30	145.395	69.46		30	167.116	120.302		30	70.038	299.247		30	290.79	598.729		30	116.582	311.795		30	273.059	49.308		30	75.357	242.565		30	69.151
31	90.872	34.395		31	53.193	359.758		31	92.645	427.976		31	114.366	521.922		31	115.252	60.315		31	145.395	71.595		31	167.116	125.592		31	70.038	311.424		31	290.79	603.203		31	116.582	309.814		31	273.059	48.458		31	75.357	255.429		31	69.151
32	90.872	33.863		32	53.193	349.358		32	92.645	432.407		32	114.366	537.368		32	115.252	61.865		32	145.395	73.03		32	167.116	121.533		32	70.038	309.443		32	290.79	598.233		32	116.582	321.939		32	273.059	49.385		32	75.357	242.976		32	69.151
33	90.872	35.263		33	53.193	364.925		33	92.645	436.22		33	114.366	543.915		33	115.252	61.419		33	145.395	69.82		33	167.116	127.377		33	70.038	296.538		33	290.79	606.607		33	116.582	315.787		33	273.059	50.729		33	75.357	242.724		33	69.151
34	90.872	30.917		34	53.193	355.083		34	92.645	434.048		34	114.366	530.907		34	115.252	59.723		34	145.395	69.579		34	167.116	121.493		34	70.038	289.741		34	290.79	613.82		34	116.582	316.202		34	273.059	48.412		34	75.357	258.459		34	69.151
35	90.872	35.873		35	53.193	355.1		35	92.645	441.234		35	114.366	538.566		35	115.252	61.142		35	145.395	73.381		35	167.116	124.212		35	70.038	306.184		35	290.79	604.918		35	116.582	309.966		35	273.059	48.536		35	75.357	247.059		35	69.151
36	90.872	36.151		36	53.193	345.133		36	92.645	439.78		36	114.366	518.643		36	115.252	61.369		36	145.395	71.762		36	167.116	123.729		36	70.038	292.329		36	290.79	610.209		36	116.582	313.627		36	273.059	50.977		36	75.357	241.906		36	69.151
37	90.872	35.6		37	53.193	348.558		37	92.645	436.105		37	114.366	528.101		37	115.252	59.488		37	145.395	70.515		37	167.116	122.411		37	70.038	291.07		37	290.79	611.079		37	116.582	313.202		37	273.059	49.739		37	75.357	243.371		37	69.151
38	90.872	33.151		38	53.193	349.542		38	92.645	431.397		38	114.366	528.585		38	115.252	62.623		38	145.395	69.485		38	167.116	125.584		38	70.038	299.5		38	290.79	603.34		38	116.582	309.262		38	273.059	49.102		38	75.357	239.547		38	69.151
39	90.872	37.751		39	53.193	358.417		39	92.645	422.608		39	114.366	526.717		39	115.252	66.277		39	145.395	70.735		39	167.116	116.621		39	70.038	289.741		39	290.79	612.887		39	116.582	303.35		39	273.059	49.708		39	75.357	240.7		39	69.151
40	90.872	36.351		40	53.193	341.55		40	92.645	417.354		40	114.366	522.376		40	115.252	60.996		40	145.395	69.604		40	167.116	124.34		40	70.038	306.994		40	290.79	609.398		40	116.582	307.057		40	273.059	49.682		40	75.357	247.635		40	69.151
41	90.872	35.771		41	53.193	345.042		41	92.645	408.885		41	114.366	525.349		41	115.252	62.927		41	145.395	74.771		41	167.116	125.897		41	70.038	293.544		41	290.79	606.828		41	116.582	302.665		41	273.059	47.644		41	75.357	244.918		41	69.151
42	90.872	37.283		42	53.193	335.742		42	92.645	407.895		42	114.366	529.589		42	115.252	62.696		42	145.395	73.39		42	167.116	121.228		42	70.038	281.753		42	290.79	600.027		42	116.582	300.753		42	273.059	49.479		42	75.357	246.129		42	69.151
43	90.872	34.161		43	53.193	336.325		43	92.645	426.77		43	114.366	530.05		43	115.252	64.396		43	145.395	70.659		43	167.116	120.289		43	70.038	287.722		43	290.79	616.855		43	116.582	296.11		43	273.059	50.049		43	75.357	250.794		43	69.151
44	90.872	34.546		44	53.193	354.625		44	92.645	426.861		44	114.366	521.895		44	115.252	61.05		44	145.395	72.006		44	167.116	122.151		44	70.038	296.272		44	290.79	619.479		44	116.582	299.255		44	273.059	49.43		44	75.357	259.288		44	69.151
45	90.872	35.215		45	53.193	349.358		45	92.645	409.005		45	114.366	542.008		45	115.252	63.127		45	145.395	71.863		45	167.116	123.57		45	70.038	282.266		45	290.79	612.073		45	116.582	292.042		45	273.059	47.998		45	75.357	242.976		45	69.151
46	90.872	36.502		46	53.193	341.367		46	92.645	415.287		46	114.366	507.054		46	115.252	63.204		46	145.395	71.841		46	167.116	124.989		46	70.038	277.563		46	290.79	615.602		46	116.582	295.46		46	273.059	49.981		46	75.357	246.653		46	69.151
47	90.872	35.751		47	53.193	348.117		47	92.645	405.737		47	114.366	520.287		47	115.252	62.573		47	145.395	72.796		47	167.116	121.329		47	70.038	279.722		47	290.79	615.11		47	116.582	298.89		47	273.059	50.968		47	75.357	243.141		47	69.151
48	90.872	33.498		48	53.193	345.483		48	92.645	408.99		48	114.366	516.973		48	115.252	64.046		48	145.395	70.046		48	167.116	122.26		48	70.038	281.563		48	290.79	609.87		48	116.582	305.768		48	273.059	49.166		48	75.357	247.4		48	69.151
49	90.872	34.629		49	53.193	343.625		49	92.645	413.493		49	114.366	512.434		49	115.252	61.669		49	145.395	73.055		49	167.116	123.695		49	70.038	284.475		49	290.79	607.451		49	116.582	302.156		49	273.059	49.169		49	75.357	243.271		49	69.151
50	90.872	34.327		50	53.193	339.45		50	92.645	403.928		50	114.366	493.597		50	115.252	60.481		50	145.395	71.082		50	167.116	126.414		50	70.038	291.032		50	290.79	597.631		50	116.582	293.475		50	273.059	48.721		50	75.357	237.424		50	69.151
51	90.872	34.512		51	53.193	338.392		51	92.645	411.904		51	114.366	488.047		51	115.252	59.508		51	145.395	68.704		51	167.116	123.92		51	70.038	282.766		51	290.79	597.7		51	116.582	305.646		51	273.059	50.826		51	75.357	236.694		51	69.151
52	90.872	33.844		52	53.193	344.7		52	92.645	416.12		52	114.366	484.984		52	115.252	59.762		52	145.395	75.71		52	167.116	128.785		52	70.038	269.829		52	290.79	606.954		52	116.582	306.354		52	273.059	50.065		52	75.357	241.294		52	69.151
53	90.872	33.717		53	53.193	344.617		53	92.645	409.847		53	114.366	483.829		53	115.252	64.077		53	145.395	72.753		53	167.116	124.286		53	70.038	262.57		53	290.79	624.832		53	116.582	296.779		53	273.059	49.028		53	75.357	238.653		53	69.151
54	90.872	34.327		54	53.193	343.583		54	92.645	416.852		54	114.366	476.709		54	115.252	61.515		54	145.395	71.058		54	167.116	123.629		54	70.038	243.696		54	290.79	613.759		54	116.582	304.962		54	273.059	49.554		54	75.357	241.206		54	69.151
55	90.872	33.498		55	53.193	346.383		55	92.645	411.847		55	114.366	443.74		55	115.252	62.042		55	145.395	71.582		55	167.116	126.727		55	70.038	281.057		55	290.79	608.248		55	116.582	306.369		55	273.059	49.812		55	75.357	239.8		55	69.151
56	90.872	34.995		56	53.193	345.983		56	92.645	429.392		56	114.366	456.202		56	115.252	64.269		56	145.395	73.841		56	167.116	121.82		56	70.038	268.816		56	290.79	617.793		56	116.582	306.631		56	273.059	51.24		56	75.357	237.1		56	69.151
57	90.872	34.898		57	53.193	343.058		57	92.645	411.402		57	114.366	452.058		57	115.252	59.662		57	145.395	70.735		57	167.116	122.199		57	70.038	283.31		57	290.79	607.598		57	116.582	305.726		57	273.059	48.937		57	75.357	239.406		57	69.151
58	90.872	33.346		58	53.193	357.458		58	92.645	432.885		58	114.366	473.953		58	115.252	66.096		58	145.395	71.762		58	167.116	124.21		58	70.038	286.614		58	290.79	611.127		58	116.582	306.422		58	273.059	51.06		58	75.357	238.241		58	69.151
59	90.872	35.146		59	53.193	343.8		59	92.645	419.091		59	114.366	485.411		59	115.252	60.7		59	145.395	74.857		59	167.116	123.984		59	70.038	284.848		59	290.79	609.372		59	116.582	302.053		59	273.059	49.784		59	75.357	234.429		59	69.151
60	90.872	34.317		60	53.193	350.925		60	92.645	410.866		60	114.366	505.74		60	115.252	60.115		60	145.395	72.607		60	167.116	122.907		60	70.038	277.038		60	290.79	609.864		60	116.582	301.384		60	273.059	49.958		60	75.357	224.912		60	69.151
61	90.872	33.756		61	53.193	342.275		61	92.645	426.871		61	114.366	508.178		61	115.252	64.038		61	145.395	68.506		61	167.116	119.377		61	70.038	281.222		61	290.79	608.695		61	116.582	299.437		61	273.059	50.638		61	75.357	233.171		61	69.151
62	90.872	35.376		62	53.193	344.025		62	92.645	425.952		62	114.366	511.194		62	115.252	61.838		62	145.395	72.473		62	167.116	119.597		62	70.038	281.722		62	290.79	615.402		62	116.582	299.806		62	273.059	50.795		62	75.357	235.518		62	69.151
63	90.872	33.746		63	53.193	347.85		63	92.645	423.254		63	114.366	502.287		63	115.252	59.031		63	145.395	69.979		63	167.116	121.141		63	70.038	276.905		63	290.79	609.947		63	116.582	296.624		63	273.059	51.506		63	75.357	231.371		63	69.151
64	90.872	36.332		64	53.193	356.517		64	92.645	432.321		64	114.366	484.888		64	115.252	59.742		64	145.395	70.979		64	167.116	120.186		64	70.038	273.956		64	290.79	616.562		64	116.582	290.198		64	273.059	50.33		64	75.357	232.818		64	69.151
65	90.872	37.82		65	53.193	364.733		65	92.645	418.478		65	114.366	484.527		65	115.252	62.685		65	145.395	71.509		65	167.116	117.865		65	70.038	279.949		65	290.79	612.509		65	116.582	289.407		65	273.059	51.157		65	75.357	222.712		65	69.151
66	90.872	34.576		66	53.193	357.967		66	92.645	431.421		66	114.366	471.31		66	115.252	61.9		66	145.395	70.122		66	167.116	122.462		66	70.038	272.367		66	290.79	611.762		66	116.582	299.677		66	273.059	48.696		66	75.357	223.841		66	69.151
67	90.872	36.107		67	53.193	347.733		67	92.645	428.545		67	114.366	481.233		67	115.252	60.485		67	145.395	73.137		67	167.116	118.334		67	70.038	260.025		67	290.79	610.703		67	116.582	296.509		67	273.059	50.547		67	75.357	235.871		67	69.151
68	90.872	35.366		68	53.193	355.917		68	92.645	419.737		68	114.366	489.996		68	115.252	62.754		68	145.395	71.534		68	167.116	121.865		68	70.038	278.747		68	290.79	599.916		68	116.582	304.783		68	273.059	51.11		68	75.357	224.853		68	69.151
69	90.872	35.332		69	53.193	346.267		69	92.645	419.928		69	114.366	502.899		69	115.252	61.665		69	145.395	68.601		69	167.116	115.098		69	70.038	258.791		69	290.79	604.277		69	116.582	298.38		69	273.059	52.278		69	75.357	218.341		69	69.151
70	90.872	34.088		70	53.193	352.367		70	92.645	416.397		70	114.366	500.981		70	115.252	59.019		70	145.395	73.518		70	167.116	119.939		70	70.038	264.253		70	290.79	611.482		70	116.582	298.475		70	273.059	53.151		70	75.357	230.853		70	69.151
71	90.872	33.927		71	53.193	349.042		71	92.645	420.914		71	114.366	496.26		71	115.252	60.592		71	145.395	73.159		71	167.116	117.897		71	70.038	271.133		71	290.79	612.302		71	116.582	302.726		71	273.059	49.977		71	75.357	235.206		71	69.151
72	90.872	36.766		72	53.193	354.55		72	92.645	407.928		72	114.366	484.147		72	115.252	64.912		72	145.395	71.744		72	167.116	116.639		72	70.038	263.057		72	290.79	607.498		72	116.582	306.392		72	273.059	49.576		72	75.357	232.818		72	69.151
73	90.872	35.463		73	53.193	345.167		73	92.645	416.167		73	114.366	486.919		73	115.252	61.731		73	145.395	70.96		73	167.116	115.536		73	70.038	265.032		73	290.79	603.892		73	116.582	304.426		73	273.059	52.667		73	75.357	230.588		73	69.151
74	90.872	33.673		74	53.193	345.7		74	92.645	431.713		74	114.366	497.442		74	115.252	61.131		74	145.395	71.274		74	167.116	120.085		74	70.038	255.924		74	290.79	606.206		74	116.582	298.84		74	273.059	50.175		74	75.357	233.753		74	69.151
75	90.872	37.137		75	53.193	343.6		75	92.645	414.909		75	114.366	503.965		75	115.252	60.142		75	145.395	73.061		75	167.116	120.103		75	70.038	273.367		75	290.79	608.755		75	116.582	303.061		75	273.059	49.911		75	75.357	222.165		75	69.151
76	90.872	35.829		76	53.193	344.633		76	92.645	417.335		76	114.366	514.287		76	115.252	61.996		76	145.395	67.229		76	167.116	119.618		76	70.038	275.791		76	290.79	614.701		76	116.582	300.437		76	273.059	50.318		76	75.357	232.159		76	69.151
77	90.872	35.449		77	53.193	330.45		77	92.645	410.861		77	114.366	504.388		77	115.252	62.181		77	145.395	70.43		77	167.116	118.52		77	70.038	264.633		77	290.79	610.181		77	116.582	297.152		77	273.059	52.213		77	75.357	229.565		77	69.151
78	90.872	30.395		78	53.193	341.292		78	92.645	406.923		78	114.366	491.19		78	115.252	59.269		78	145.395	74.116		78	167.116	114.793		78	70.038	272.975		78	290.79	613.352		78	116.582	288.852		78	273.059	50.221		78	75.357	228.4		78	69.151
79	90.872	36.698		79	53.193	332.317		79	92.645	405.502		79	114.366	504.764		79	115.252	57.915		79	145.395	73.854		79	167.116	116.443		79	70.038	279.285		79	290.79	614.805		79	116.582	300.019		79	273.059	50.594		79	75.357	230.4		79	69.151
80	90.872	35.288		80	53.193	345.425		80	92.645	413.455		80	114.366	510.314		80	115.252	59.969		80	145.395	72.363		80	167.116	117.83		80	70.038	272.816		80	290.79	611.988		80	116.582	294.825		80	273.059	50.347		80	75.357	226.424		80	69.151
81	90.872	34.302		81	53.193	341.767		81	92.645	419.584		81	114.366	509.213		81	115.252	62.062		81	145.395	71.945		81	167.116	113.95		81	70.038	266.285		81	290.79	615.064		81	116.582	299.502		81	273.059	53.131		81	75.357	217.906		81	69.151
82	90.872	34.405		82	53.193	341.467		82	92.645	414.091		82	114.366	512.554		82	115.252	61.973		82	145.395	70.393		82	167.116	113.92		82	70.038	269.854		82	290.79	611.82		82	116.582	294.479		82	273.059	50.532		82	75.357	223.735		82	69.151
83	90.872	36.098		83	53.193	330.775		83	92.645	415.684		83	114.366	512.322		83	115.252	62.5		83	145.395	69.985		83	167.116	120.828		83	70.038	264.987		83	290.79	611.282		83	116.582	297.133		83	273.059	47.765		83	75.357	217.829		83	69.151
84	90.872	36.059		84	53.193	339.817		84	92.645	416.33		84	114.366	517.182		84	115.252	57.727		84	145.395	67.476		84	167.116	115.467		84	70.038	279.424		84	290.79	628.294		84	116.582	291.966		84	273.059	49.255		84	75.357	223.465		84	69.151
85	90.872	38.2		85	53.193	334.917		85	92.645	416.565		85	114.366	511.136		85	115.252	61.454		85	145.395	70.881		85	167.116	113.849		85	70.038	274.848		85	290.79	613.613		85	116.582	292.156		85	273.059	48.885		85	75.357	222.229		85	69.151
86	90.872	32.727		86	53.193	337.225		86	92.645	420.837		86	114.366	497.717		86	115.252	61.154		86	145.395	71.22		86	167.116	117.849		86	70.038	271.994		86	290.79	615.544		86	116.582	292.057		86	273.059	50.386		86	75.357	215.482		86	69.151
87	90.872	35.522		87	53.193	341.617		87	92.645	411.847		87	114.366	517.984		87	115.252	59.281		87	145.395	69.707		87	167.116	115.138		87	70.038	281.171		87	290.79	621.27		87	116.582	287.513		87	273.059	48.13		87	75.357	221.5		87	69.151
88	90.872	33.746		88	53.193	336.392		88	92.645	409.416		88	114.366	523.911		88	115.252	61.508		88	145.395	70.393		88	167.116	111.674		88	70.038	280.981		88	290.79	611.652		88	116.582	279.779		88	273.059	50.029		88	75.357	221.088		88	69.151
89	90.872	34.298		89	53.193	328		89	92.645	407.541		89	114.366	519.911		89	115.252	60.258		89	145.395	69.162		89	167.116	117.146		89	70.038	275.456		89	290.79	621.707		89	116.582	279.806		89	273.059	49.218		89	75.357	220.753		89	69.151
90	90.872	34.829		90	53.193	340.792		90	92.645	404.971		90	114.366	503.326		90	115.252	63.096		90	145.395	72.396		90	167.116	115.43		90	70.038	264.633		90	290.79	619.832		90	116.582	283.285		90	273.059	50.539		90	75.357	230.082		90	69.151
91	90.872	35.717		91	53.193	341.092		91	92.645	394.397		91	114.366	522.752		91	115.252	59.862		91	145.395	70.567		91	167.116	114.533		91	70.038	276.468		91	290.79	625.555		91	116.582	285.065		91	273.059	49.744		91	75.357	216.835		91	69.151
92	90.872	36.044		92	53.193	342.983		92	92.645	406.88		92	114.366	513.171		92	115.252	65.154		92	145.395	69.018		92	167.116	114.037		92	70.038	276.937		92	290.79	615.878		92	116.582	284.068		92	273.059	49.644		92	75.357	227.294		92	69.151
93	90.872	34.156		93	53.193	334.233		93	92.645	396.507		93	114.366	527.306		93	115.252	63.185		93	145.395	70.838		93	167.116	114.668		93	70.038	277.101		93	290.79	622.652		93	116.582	279.335		93	273.059	50.575		93	75.357	218.529		93	69.151
94	90.872	36.073		94	53.193	334.458		94	92.645	397		94	114.366	511.899		94	115.252	62.481		94	145.395	70.146		94	167.116	116.393		94	70.038	274.152		94	290.79	622.96		94	116.582	277.582		94	273.059	49.878		94	75.357	220.306		94	69.151
95	90.872	36.098		95	53.193	330.342		95	92.645	386.187		95	114.366	513.798		95	115.252	62.469		95	145.395	71.848		95	167.116	111.435		95	70.038	287.601		95	290.79	616.77		95	116.582	281.783		95	273.059	50.162		95	75.357	223.965		95	69.151
96	90.872	35.263		96	53.193	341.542		96	92.645	388.703		96	114.366	510.326		96	115.252	62.054		96	145.395	68.707		96	167.116	112.21		96	70.038	280.203		96	290.79	625.258		96	116.582	276.548		96	273.059	49.432		96	75.357	220.676		96	69.151
97	90.872	34.624		97	53.193	335.15		97	92.645	393.086		97	114.366	513.767		97	115.252	62.531		97	145.395	69.82		97	167.116	112.674		97	70.038	285.544		97	290.79	615.166		97	116.582	283.437		97	273.059	52.679		97	75.357	229.006		97	69.151
98	90.872	34.093		98	53.193	340.55		98	92.645	387.129		98	114.366	500.853		98	115.252	60.235		98	145.395	66.713		98	167.116	112.536		98	70.038	274.418		98	290.79	622.678		98	116.582	276.255		98	273.059	53.279		98	75.357	217.441		98	69.151
99	90.872	34.01		99	53.193	340.142		99	92.645	399.636		99	114.366	518.841		99	115.252	62.812		99	145.395	71.951		99	167.116	111.454		99	70.038	278.114		99	290.79	617.992		99	116.582	270.825		99	273.059	49.758		99	75.357	210.612		99	69.151
100	90.872	35.127		100	53.193	330.075		100	92.645	394.574		100	114.366	503.523		100	115.252	62.088		100	145.395	69.598		100	167.116	113.57		100	70.038	275.703		100	290.79	619.732		100	116.582	276.563		100	273.059	51.026		100	75.357	218.047		100	69.151
101	90.872	34.8		101	53.193	336.908		101	92.645	387.167		101	114.366	502.523		101	115.252	61.65		101	145.395	68.098		101	167.116	111.698		101	70.038	273.171		101	290.79	613.707		101	116.582	272.198		101	273.059	50.216		101	75.357	213.906		101	69.151
102	90.872	38.049		102	53.193	334.525		102	92.645	383.124		102	114.366	500.814		102	115.252	60.242		102	145.395	70.317		102	167.116	116.658		102	70.038	268.835		102	290.79	614.944		102	116.582	273.217		102	273.059	51.532		102	75.357	225.224		102	69.151
103	90.872	37.532		103	53.193	345.675		103	92.645	383.928		103	114.366	517.36		103	115.252	61.288		103	145.395	70.125		103	167.116	112.631		103	70.038	272.741		103	290.79	623.776		103	116.582	277.852		103	273.059	50.812		103	75.357	222.212		103	69.151
104	90.872	33.859		104	53.193	330.025		104	92.645	390.775		104	114.366	509.434		104	115.252	63.469		104	145.395	70.762		104	167.116	114.005		104	70.038	272.633		104	290.79	632.569		104	116.582	272.643		104	273.059	49.091		104	75.357	224.165		104	69.151
105	90.872	35.18		105	53.193	334.092		105	92.645	380.234		105	114.366	507.43		105	115.252	59.562		105	145.395	70.668		105	167.116	112.634		105	70.038	275.082		105	290.79	625.409		105	116.582	268.81		105	273.059	51.781		105	75.357	211.853		105	69.151
106	90.872	35.59		106	53.193	325.967		106	92.645	378.086		106	114.366	505.287		106	115.252	60.719		106	145.395	72.729		106	167.116	112.265		106	70.038	272.968		106	290.79	621.718		106	116.582	272.228		106	273.059	49.847		106	75.357	212.471		106	69.151
107	90.872	32.951		107	53.193	319.575		107	92.645	380.933		107	114.366	505.24		107	115.252	60.835		107	145.395	68.527		107	167.116	115.626		107	70.038	262.133		107	290.79	619.986		107	116.582	265.35		107	273.059	48.442		107	75.357	221.688		107	69.151
108	90.872	34.166		108	53.193	322.833		108	92.645	395.89		108	114.366	503.86		108	115.252	59.15		108	145.395	72.951		108	167.116	112.897		108	70.038	267.791		108	290.79	620.63		108	116.582	273.342		108	273.059	51.758		108	75.357	215.771		108	69.151
109	90.872	36.61		109	53.193	322.325		109	92.645	382.258		109	114.366	486.694		109	115.252	58.469		109	145.395	69.162		109	167.116	114.767		109	70.038	272.146		109	290.79	624.259		109	116.582	278.928		109	273.059	52.104		109	75.357	219.629		109	69.151
110	90.872	34.434		110	53.193	327.183		110	92.645	382.627		110	114.366	497.752		110	115.252	61.742		110	145.395	72.546		110	167.116	114.223		110	70.038	267.671		110	290.79	620.71		110	116.582	268.437		110	273.059	50.416		110	75.357	214.118		110	69.151
111	90.872	34.312		111	53.193	315.9		111	92.645	376.703		111	114.366	506.74		111	115.252	59.585		111	145.395	69.771		111	167.116	115.082		111	70.038	261.747		111	290.79	618.12		111	116.582	273.008		111	273.059	49.278		111	75.357	219.747		111	69.151
112	90.872	37.263		112	53.193	330.308		112	92.645	391.847		112	114.366	500.12		112	115.252	62.081		112	145.395	72.622		112	167.116	115.408		112	70.038	270.152		112	290.79	613.399		112	116.582	276.863		112	273.059	50.114		112	75.357	208.188		112	69.151
113	90.872	37.463		113	53.193	329.625		113	92.645	385.986		113	114.366	493.512		113	115.252	62.127		113	145.395	69.143		113	167.116	113.186		113	70.038	268.196		113	290.79	621.235		113	116.582	269.814		113	273.059	50.437		113	75.357	217.682		113	69.151
114	90.872	33.795		114	53.193	331.717		114	92.645	386.411		114	114.366	496.329		114	115.252	60.823		114	145.395	67.497		114	167.116	116.981		114	70.038	264.684		114	290.79	614.056		114	116.582	261.232		114	273.059	50.89		114	75.357	219.982		114	69.151
115	90.872	36.941		115	53.193	314.375		115	92.645	393.947		115	114.366	490.574		115	115.252	59.527		115	145.395	68.82		115	167.116	117.082		115	70.038	262.082		115	290.79	629.669		115	116.582	268.548		115	273.059	49.391		115	75.357	221.141		115	69.151
116	90.872	36.556		116	53.193	321		116	92.645	382.861		116	114.366	491.903		116	115.252	61.108		116	145.395	69.872		116	167.116	116.528		116	70.038	270.741		116	290.79	625.585		116	116.582	266.643		116	273.059	51.188		116	75.357	226.565		116	69.151
117	90.872	35.556		117	53.193	325.125		117	92.645	375.512		117	114.366	490.57		117	115.252	62.465		117	145.395	67.18		117	167.116	118.05		117	70.038	270.456		117	290.79	625.235		117	116.582	263.836		117	273.059	50.237		117	75.357	217.882		117	69.151
118	90.872	35.615		118	53.193	325.775		118	92.645	369.349		118	114.366	493.535		118	115.252	61.4		118	145.395	69.649		118	167.116	116.631		118	70.038	268.266		118	290.79	632.988		118	116.582	267.665		118	273.059	51.091		118	75.357	213.165		118	69.151
119	90.872	37.395		119	53.193	329.583		119	92.645	370.091		119	114.366	492.539		119	115.252	61.112		119	145.395	68.143		119	167.116	115.082		119	70.038	263.633		119	290.79	635.814		119	116.582	268.525		119	273.059	50.917		119	75.357	220.735		119	69.151
120	90.872	35.737		120	53.193	324.208		120	92.645	368.703		120	114.366	477.76		120	115.252	58.85		120	145.395	69.162		120	167.116	117.79		120	70.038	261.297		120	290.79	626.718		120	116.582	262.323		120	273.059	50.032		120	75.357	226.988		120	69.151
121	90.872	34.424		121	53.193	329.225		121	92.645	369.799		121	114.366	482.422		121	115.252	62.192		121	145.395	68.948		121	167.116	109.788		121	70.038	261.766		121	290.79	625.087		121	116.582	270.145		121	273.059	51.229		121	75.357	225.635		121	69.151
122	90.872	35.732		122	53.193	307.108		122	92.645	369.163		122	114.366	487.872		122	115.252	59.296		122	145.395	71.567		122	167.116	115.679		122	70.038	259.335		122	290.79	626.848		122	116.582	260.175		122	273.059	48.318		122	75.357	223.076		122	69.151
123	90.872	36.937		123	53.193	329.708		123	92.645	359.766		123	114.366	486.473		123	115.252	57.819		123	145.395	68.32		123	167.116	110.804		123	70.038	257.968		123	290.79	626.86		123	116.582	263.548		123	273.059	49.347		123	75.357	229.429		123	69.151
124	90.872	34.741		124	53.193	323.45		124	92.645	362.124		124	114.366	474.492		124	115.252	63.038		124	145.395	68.466		124	167.116	115.804		124	70.038	274.348		124	290.79	630.367		124	116.582	267.909		124	273.059	49.899		124	75.357	230.747		124	69.151
125	90.872	36.146		125	53.193	322.708		125	92.645	360.947		125	114.366	471.163		125	115.252	62.469		125	145.395	67.723		125	167.116	113.273		125	70.038	270.468		125	290.79	636.067		125	116.582	257.456		125	273.059	49.485		125	75.357	229.124		125	69.151
126	90.872	33.58		126	53.193	323.942		126	92.645	365.311		126	114.366	479.31		126	115.252	60.008		126	145.395	67.171		126	167.116	111.212		126	70.038	271.595		126	290.79	634.602		126	116.582	259.43		126	273.059	48.516		126	75.357	232.824		126	69.151
127	90.872	36.19		127	53.193	300.483		127	92.645	360.617		127	114.366	480.248		127	115.252	59.142		127	145.395	70.46		127	167.116	109.422		127	70.038	254.253		127	290.79	634.064		127	116.582	258.924		127	273.059	49.583		127	75.357	227.529		127	69.151
128	90.872	34.22		128	53.193	316.7		128	92.645	363.182		128	114.366	480.659		128	115.252	58.481		128	145.395	69.604		128	167.116	112.377		128	70.038	275.614		128	290.79	639.079		128	116.582	248.042		128	273.059	50.013		128	75.357	230.041		128	69.151
129	90.872	36.566		129	53.193	327.467		129	92.645	362.335		129	114.366	484.233		129	115.252	60.8		129	145.395	72.183		129	167.116	110.7		129	70.038	262.278		129	290.79	633.383		129	116.582	257.829		129	273.059	50.61		129	75.357	230.741		129	69.151
130	90.872	34.712		130	53.193	313.892		130	92.645	359.78		130	114.366	483.217		130	115.252	60.496		130	145.395	70.119		130	167.116	112.358		130	70.038	265.614		130	290.79	630.101		130	116.582	253.125		130	273.059	49.508		130	75.357	229.247		130	69.151
131	90.872	34.298		131	53.193	310.333		131	92.645	367.971		131	114.366	493.174		131	115.252	60.662		131	145.395	68.619		131	167.116	111.647		131	70.038	267.652		131	290.79	637.742		131	116.582	257.445		131	273.059	52.688		131	75.357	238.359		131	69.151
132	90.872	36.463		132	53.193	318.458		132	92.645	357.1		132	114.366	485.089		132	115.252	62.108		132	145.395	70.54		132	167.116	113.326		132	70.038	274.671		132	290.79	636.652		132	116.582	250.331		132	273.059	50.914		132	75.357	224.906		132	69.151
133	90.872	34.429		133	53.193	319.967		133	92.645	370.646		133	114.366	499.891		133	115.252	61.042		133	145.395	72.527		133	167.116	113.207		133	70.038	267.152		133	290.79	634.358		133	116.582	254.331		133	273.059	50.901		133	75.357	230.188		133	69.151
134	90.872	36.127		134	53.193	325.733		134	92.645	360.124		134	114.366	499.984		134	115.252	58.073		134	145.395	69.241		134	167.116	112.592		134	70.038	252.323		134	290.79	641.181		134	116.582	251.335		134	273.059	50.477		134	75.357	224.529		134	69.151
135	90.872	35.351		135	53.193	327.208		135	92.645	371.258		135	114.366	499.585		135	115.252	61.573		135	145.395	69.598		135	167.116	113.923		135	70.038	277.671		135	290.79	634.599		135	116.582	251.506		135	273.059	48.792		135	75.357	216.976		135	69.151
136	90.872	34.532		136	53.193	319.817		136	92.645	372.239		136	114.366	493.531		136	115.252	57.431		136	145.395	65.872		136	167.116	108.61		136	70.038	273.316		136	290.79	636.245		136	116.582	252.114		136	273.059	49.344		136	75.357	217.782		136	69.151
137	90.872	34.732		137	53.193	321.558		137	92.645	361.928		137	114.366	504.674		137	115.252	57.823		137	145.395	70.265		137	167.116	112.427		137	70.038	268.215		137	290.79	631.017		137	116.582	248.996		137	273.059	50.381		137	75.357	214.935		137	69.151
138	90.872	35.541		138	53.193	323.55		138	92.645	372.431		138	114.366	492.457		138	115.252	67.996		138	145.395	67.162		138	167.116	112.149		138	70.038	262.481		138	290.79	631.572		138	116.582	246.798		138	273.059	49.359		138	75.357	224.453		138	69.151
139	90.872	35.971		139	53.193	321.6		139	92.645	357.675		139	114.366	497.132		139	115.252	60.331		139	145.395	68.463		139	167.116	108.536		139	70.038	269.715		139	290.79	627.945		139	116.582	256.494		139	273.059	47.542		139	75.357	214.124		139	69.151
140	90.872	36.688		140	53.193	336.833		140	92.645	345.478		140	114.366	501.473		140	115.252	64.219		140	145.395	67.954		140	167.116	110.032		140	70.038	270.386		140	290.79	626.378		140	116.582	254.357		140	273.059	48.378		140	75.357	219.788		140	69.151
141	90.872	36.151		141	53.193	315.475		141	92.645	370.627		141	114.366	496.322		141	115.252	59.323		141	145.395	73.814		141	167.116	110.971		141	70.038	267.285		141	290.79	631.745		141	116.582	245.152		141	273.059	48.032		141	75.357	220.912		141	69.151
142	90.872	34.22		142	53.193	326.567		142	92.645	364.842		142	114.366	505.283		142	115.252	60.481		142	145.395	67.616		142	167.116	113.772		142	70.038	265.247		142	290.79	631.431		142	116.582	248.027		142	273.059	46.565		142	75.357	218.171		142	69.151
143	90.872	36.424		143	53.193	320.025		143	92.645	373.67		143	114.366	489.434		143	115.252	59.523		143	145.395	67.226		143	167.116	111.531		143	70.038	269.082		143	290.79	641.556		143	116.582	249.144		143	273.059	48.544		143	75.357	222.688		143	69.151
144	90.872	32.976		144	53.193	326.492		144	92.645	367.856		144	114.366	502.198		144	115.252	59.873		144	145.395	69.527		144	167.116	114.947		144	70.038	257.171		144	290.79	636.165		144	116.582	246.46		144	273.059	47.42		144	75.357	219.353		144	69.151
145	90.872	36.346		145	53.193	321.258		145	92.645	377.574		145	114.366	497.74		145	115.252	60.485		145	145.395	69.607		145	167.116	110.194		145	70.038	271.759		145	290.79	634.451		145	116.582	253.213		145	273.059	46.273		145	75.357	217.882		145	69.151
146	90.872	32.263		146	53.193	319.575		146	92.645	370.799		146	114.366	496.004		146	115.252	59.354		146	145.395	68.857		146	167.116	114.796		146	70.038	269.108		146	290.79	626.248		146	116.582	249.563		146	273.059	49.114		146	75.357	210.594		146	69.151
147	90.872	35.62		147	53.193	333.55		147	92.645	373.751		147	114.366	497.236		147	115.252	60.496		147	145.395	71.43		147	167.116	110.684		147	70.038	267.019		147	290.79	634.986		147	116.582	243.255		147	273.059	48.383		147	75.357	215.606		147	69.151
148	90.872	34.571		148	53.193	327.4		148	92.645	378.038		148	114.366	491.733		148	115.252	63.242		148	145.395	70.476		148	167.116	110.732		148	70.038	270.411		148	290.79	637.921		148	116.582	246.129		148	273.059	49.573		148	75.357	212.465		148	69.151
149	90.872	36.702		149	53.193	321.067		149	92.645	375.856		149	114.366	495.612		149	115.252	60.746		149	145.395	70.29		149	167.116	110.358		149	70.038	257.918		149	290.79	630.973		149	116.582	250.133		149	273.059	49.596		149	75.357	218.306		149	69.151
150	90.872	35.595		150	53.193	313.758		150	92.645	372.33		150	114.366	497.686		150	115.252	59.765		150	145.395	67.125		150	167.116	115.928		150	70.038	265.373		150	290.79	642.294		150	116.582	242.817		150	273.059	49.325		150	75.357	217.312		150	69.151
151	90.872	37.078		151	53.193	322.492		151	92.645	383.737		151	114.366	489.357		151	115.252	61.069		151	145.395	68.805		151	167.116	116.504		151	70.038	277.728		151	290.79	636.925		151	116.582	248.281		151	273.059	48.813		151	75.357	207.312		151	69.151
152	90.872	38.151		152	53.193	332.842		152	92.645	375.378		152	114.366	498.767		152	115.252	60.865		152	145.395	66.723		152	167.116	110.692		152	70.038	273.532		152	290.79	637.261		152	116.582	245.81		152	273.059	48.429		152	75.357	211.718		152	69.151
153	90.872	34.317		153	53.193	314.675		153	92.645	360.033		153	114.366	496.357		153	115.252	61.415		153	145.395	67.137		153	167.116	108.472		153	70.038	259.658		153	290.79	639.223		153	116.582	245.445		153	273.059	47.683		153	75.357	209.153		153	69.151
154	90.872	34.376		154	53.193	308.542		154	92.645	377.411		154	114.366	485.95		154	115.252	61.658		154	145.395	67.457		154	167.116	110.719		154	70.038	268.203		154	290.79	641.485		154	116.582	245.905		154	273.059	49.128		154	75.357	209.388		154	69.151
155	90.872	35.951		155	53.193	316.217		155	92.645	381.813		155	114.366	500.581		155	115.252	65.035		155	145.395	67.351		155	167.116	113.18		155	70.038	267.842		155	290.79	636.282		155	116.582	247.681		155	273.059	49.141		155	75.357	201.535		155	69.151
156	90.872	34.19		156	53.193	306.417		156	92.645	373.785		156	114.366	498.605		156	115.252	61.219		156	145.395	69.384		156	167.116	108.82		156	70.038	261.456		156	290.79	631.239		156	116.582	244.616		156	273.059	48.506		156	75.357	217.194		156	69.151
157	90.872	38.337		157	53.193	332.658		157	92.645	375.368		157	114.366	503.682		157	115.252	60.608		157	145.395	69.274		157	167.116	111.66		157	70.038	262.519		157	290.79	629.105		157	116.582	242.624		157	273.059	48.354		157	75.357	213.053		157	69.151
158	90.872	34.054		158	53.193	317.458		158	92.645	376.809		158	114.366	499.38		158	115.252	59.712		158	145.395	66.226		158	167.116	109.308		158	70.038	271.867		158	290.79	622.156		158	116.582	246.433		158	273.059	48.846		158	75.357	208.388		158	69.151
159	90.872	34.239		159	53.193	321.425		159	92.645	378.981		159	114.366	498.709		159	115.252	61.023		159	145.395	68.244		159	167.116	114.31		159	70.038	256.614		159	290.79	627.774		159	116.582	245.897		159	273.059	50.258		159	75.357	203.476		159	69.151
160	90.872	34.683		160	53.193	308.492		160	92.645	373.813		160	114.366	505.116		160	115.252	61.027		160	145.395	65.567		160	167.116	111.92		160	70.038	257.924		160	290.79	632.814		160	116.582	241.068		160	273.059	49.295		160	75.357	211.706		160	69.151
161	90.872	33.595		161	53.193	335.142		161	92.645	382.746		161	114.366	502.209		161	115.252	61.277		161	145.395	68.741		161	167.116	110.446		161	70.038	259.696		161	290.79	634.076		161	116.582	244.669		161	273.059	49.385		161	75.357	213.612		161	69.151
162	90.872	34.532		162	53.193	323.358		162	92.645	379.799		162	114.366	501.147		162	115.252	64.585		162	145.395	67.098		162	167.116	108.438		162	70.038	269.146		162	290.79	641.183		162	116.582	245.567		162	273.059	48.75		162	75.357	209.024		162	69.151
163	90.872	33.454		163	53.193	332.15		163	92.645	369.909		163	114.366	493.093		163	115.252	61.962		163	145.395	69.32		163	167.116	108.809		163	70.038	253.557		163	290.79	633.93		163	116.582	239.631		163	273.059	48.909		163	75.357	218.253		163	69.151
164	90.872	34.351		164	53.193	321.267		164	92.645	366.569		164	114.366	505.14		164	115.252	63.196		164	145.395	66.165		164	167.116	114.91		164	70.038	254.411		164	290.79	642.561		164	116.582	241.297		164	273.059	49.596		164	75.357	220.618		164	69.151
165	90.872	36.922		165	53.193	333.825		165	92.645	375.622		165	114.366	505.791		165	115.252	63.281		165	145.395	65.296		165	167.116	113.512		165	70.038	265.165		165	290.79	630.344		165	116.582	239.62		165	273.059	49.159		165	75.357	203.912		165	69.151
166	90.872	36.356		166	53.193	327.4		166	92.645	381.067		166	114.366	503.713		166	115.252	61.188		166	145.395	71.768		166	167.116	115.252		166	70.038	261.684		166	290.79	638.848		166	116.582	251.407		166	273.059	49.042		166	75.357	219.876		166	69.151
167	90.872	35.039		167	53.193	340.058		167	92.645	380.919		167	114.366	515.376		167	115.252	61.696		167	145.395	70.177		167	167.116	115.061		167	70.038	254.576		167	290.79	633.822		167	116.582	239.106		167	273.059	49.174		167	75.357	211.635		167	69.151
168	90.872	33.585		168	53.193	327.942		168	92.645	385.11		168	114.366	494.174		168	115.252	61.581		168	145.395	67.573		168	167.116	109.056		168	70.038	255.633		168	290.79	638.139		168	116.582	242.183		168	273.059	48.131		168	75.357	222.288		168	69.151
169	90.872	34.868		169	53.193	329.275		169	92.645	385.947		169	114.366	499.787		169	115.252	61.558		169	145.395	67.393		169	167.116	112.973		169	70.038	257.968		169	290.79	640.474		169	116.582	246.441		169	273.059	48.834		169	75.357	219.435		169	69.151
170	90.872	33.449		170	53.193	326.058		170	92.645	383.206		170	114.366	497.171		170	115.252	60.988		170	145.395	67.704		170	167.116	111.135		170	70.038	251.696		170	290.79	639.075		170	116.582	233.293		170	273.059	49.274		170	75.357	215.041		170	69.151
171	90.872	36.883		171	53.193	336.417		171	92.645	374.029		171	114.366	499.891		171	115.252	61.854		171	145.395	67.607		171	167.116	106.817		171	70.038	243.753		171	290.79	635.413		171	116.582	240.722		171	273.059	48.106		171	75.357	218.812		171	69.151
172	90.872	34.737		172	53.193	328.808		172	92.645	381.55		172	114.366	513.229		172	115.252	60.846		172	145.395	67.091		172	167.116	111.239		172	70.038	250.405		172	290.79	636.854		172	116.582	245.281		172	273.059	47.683		172	75.357	212.265		172	69.151
173	90.872	36.449		173	53.193	331.842		173	92.645	385.282		173	114.366	526.229		173	115.252	63.292		173	145.395	72.899		173	167.116	110.377		173	70.038	258.797		173	290.79	633.881		173	116.582	237.913		173	273.059	47.756		173	75.357	219.135		173	69.151
174	90.872	35.615		174	53.193	324.258		174	92.645	377.699		174	114.366	510.155		174	115.252	60.512		174	145.395	68.152		174	167.116	112.589		174	70.038	264.981		174	290.79	627.762		174	116.582	234.183		174	273.059	48.927		174	75.357	212.929		174	69.151
175	90.872	35.507		175	53.193	325.425		175	92.645	382.67		175	114.366	500.403		175	115.252	60.108		175	145.395	68.79		175	167.116	110.239		175	70.038	250.975		175	290.79	641.534		175	116.582	240.684		175	273.059	47.929		175	75.357	206.724		175	69.151
176	90.872	35.907		176	53.193	328.442		176	92.645	396.172		176	114.366	504.547		176	115.252	62.465		176	145.395	68.668		176	167.116	109.363		176	70.038	260.627		176	290.79	634.12		176	116.582	235.342		176	273.059	48.414		176	75.357	212.394		176	69.151
177	90.872	36.702		177	53.193	331.133		177	92.645	373.373		177	114.366	515.213		177	115.252	64.865		177	145.395	65.954		177	167.116	107.544		177	70.038	265.614		177	290.79	638.896		177	116.582	238.221		177	273.059	48.018		177	75.357	208.953		177	69.151
178	90.872	35.834		178	53.193	317.95		178	92.645	375.627		178	114.366	510.039		178	115.252	59.65		178	145.395	66.198		178	167.116	112.663		178	70.038	259.873		178	290.79	647.973		178	116.582	234.46		178	273.059	49.607		178	75.357	209.7		178	69.151
179	90.872	34.805		179	53.193	327.108		179	92.645	387.569		179	114.366	505.69		179	115.252	60.638		179	145.395	65.046		179	167.116	115.034		179	70.038	260.892		179	290.79	631.413		179	116.582	243.122		179	273.059	47.427		179	75.357	208.688		179	69.151
180	90.872	37.259		180	53.193	315.458		180	92.645	379.541		180	114.366	503.884		180	115.252	60.758		180	145.395	67.976		180	167.116	111.271		180	70.038	265.595		180	290.79	639.122		180	116.582	237.871		180	273.059	50.036		180	75.357	214.118		180	69.151
181	90.872	34.127		181	53.193	326.733		181	92.645	379.99		181	114.366	488.957		181	115.252	60.9		181	145.395	64.54		181	167.116	114.817		181	70.038	263.741		181	290.79	637.877		181	116.582	240.54		181	273.059	49.32		181	75.357	216.547		181	69.151
182	90.872	35.712		182	53.193	337.667		182	92.645	390.78		182	114.366	484.473		182	115.252	63.285		182	145.395	66.448		182	167.116	112.658		182	70.038	266.633		182	290.79	643.398		182	116.582	247.243		182	273.059	48.847		182	75.357	214.006		182	69.151
183	90.872	34.673		183	53.193	337.55		183	92.645	388.842		183	114.366	490.426		183	115.252	61.296		183	145.395	65.113		183	167.116	114.531		183	70.038	265.006		183	290.79	635.241		183	116.582	238.308		183	273.059	48.617		183	75.357	219.294		183	69.151
184	90.872	34.561		184	53.193	342.692		184	92.645	389.813		184	114.366	484.907		184	115.252	60.762		184	145.395	65.585		184	167.116	113.594		184	70.038	261.671		184	290.79	634.736		184	116.582	245.217		184	273.059	48.679		184	75.357	211.606		184	69.151
185	90.872	35.278		185	53.193	334.833		185	92.645	401.809		185	114.366	493.016		185	115.252	57.881		185	145.395	66.11		185	167.116	110.57		185	70.038	257.082		185	290.79	636.869		185	116.582	232.262		185	273.059	49.06		185	75.357	209.682		185	69.151
186	90.872	34.722		186	53.193	335.717		186	92.645	396.569		186	114.366	490.012		186	115.252	59.985		186	145.395	65.854		186	167.116	111.809		186	70.038	273.513		186	290.79	624.732		186	116.582	236.122		186	273.059	49.513		186	75.357	214.171		186	69.151
187	90.872	35.898		187	53.193	319.817		187	92.645	392.445		187	114.366	485		187	115.252	59.931		187	145.395	67.162		187	167.116	113.501		187	70.038	275.158		187	290.79	628.703		187	116.582	246.065		187	273.059	48.367		187	75.357	208.824		187	69.151
188	90.872	34.966		188	53.193	330.817		188	92.645	387		188	114.366	500.101		188	115.252	62.177		188	145.395	65.348		188	167.116	111.202		188	70.038	275.665		188	290.79	633.062		188	116.582	237.627		188	273.059	49.213		188	75.357	214.494		188	69.151
189	90.872	36.439		189	53.193	326.075		189	92.645	386.469		189	114.366	488.748		189	115.252	60.927		189	145.395	67.918		189	167.116	112.09		189	70.038	269.696		189	290.79	637.77		189	116.582	239.19		189	273.059	50.094		189	75.357	212.288		189	69.151
190	90.872	34.068		190	53.193	320.125		190	92.645	386.426		190	114.366	522.112		190	115.252	58.335		190	145.395	67.277		190	167.116	115.122		190	70.038	271.234		190	290.79	635.239		190	116.582	238.095		190	273.059	47.916		190	75.357	217.653		190	69.151
191	90.872	37.644		191	53.193	341.283		191	92.645	390.502		191	114.366	511.779		191	115.252	61.973		191	145.395	67.003		191	167.116	115.801		191	70.038	273.937		191	290.79	635.578		191	116.582	238.061		191	273.059	48.406		191	75.357	209.318		191	69.151
192	90.872	35.083		192	53.193	349.108		192	92.645	381.957		192	114.366	517.709		192	115.252	56.946		192	145.395	67.189		192	167.116	110.804		192	70.038	268.019		192	290.79	629.913		192	116.582	234.764		192	273.059	50.917		192	75.357	212.941		192	69.151
193	90.872	34.263		193	53.193	343.058		193	92.645	389.679		193	114.366	504.295		193	115.252	58.885		193	145.395	64.418		193	167.116	109.029		193	70.038	271.5		193	290.79	645.52		193	116.582	230.97		193	273.059	49.601		193	75.357	216.094		193	69.151
194	90.872	35.522		194	53.193	337.133		194	92.645	401.675		194	114.366	505.225		194	115.252	58.585		194	145.395	65.076		194	167.116	114.058		194	70.038	275.639		194	290.79	639.721		194	116.582	237.251		194	273.059	49.151		194	75.357	207.535		194	69.151
195	90.872	35.639		195	53.193	336.192		195	92.645	394.254		195	114.366	503.531		195	115.252	59.681		195	145.395	65.226		195	167.116	114.475		195	70.038	273.177		195	290.79	639.14		195	116.582	230.81		195	273.059	48.865		195	75.357	207.918		195	69.151
196	90.872	35.488		196	53.193	345.283		196	92.645	388.005		196	114.366	507.151		196	115.252	58.058		196	145.395	66.451		196	167.116	115.271		196	70.038	275.506		196	290.79	636.079		196	116.582	234.008		196	273.059	49.291		196	75.357	205.882		196	69.151
197	90.872	34.8		197	53.193	327.483		197	92.645	402.22		197	114.366	499.655		197	115.252	62.512		197	145.395	67.198		197	167.116	113.279		197	70.038	275.677		197	290.79	630.694		197	116.582	224.878		197	273.059	48.745		197	75.357	212.582		197	69.151
198	90.872	35.415		198	53.193	337.017		198	92.645	396.349		198	114.366	506.694		198	115.252	60.4		198	145.395	64.875		198	167.116	111.387		198	70.038	278.62		198	290.79	644.986		198	116.582	215.262		198	273.059	48.994		198	75.357	204.571		198	69.151
199	90.872	35.185		199	53.193	337.717		199	92.645	384.445		199	114.366	497.279		199	115.252	59.008		199	145.395	62.762		199	167.116	112.459		199	70.038	264.31		199	290.79	631.207		199	116.582	224.087		199	273.059	49.742		199	75.357	203.1		199	69.151
200	90.872	33.976		200	53.193	322.783		200	92.645	391.679		200	114.366	504.756		200	115.252	57.104		200	145.395	63.918		200	167.116	112		200	70.038	280.373		200	290.79	631.29		200	116.582	229.468		200	273.059	47.881		200	75.357	214.294		200	69.151
201	90.872	34.454		201	53.193	333.942		201	92.645	389.976		201	114.366	493.907		201	115.252	60.008		201	145.395	64.04		201	167.116	113.053		201	70.038	278.076		201	290.79	631.992		201	116.582	224.464		201	273.059	47.649		201	75.357	204.829		201	69.151
202	90.872	37.044		202	53.193	326.708		202	92.645	391.56		202	114.366	511.434		202	115.252	60.073		202	145.395	67.415		202	167.116	111.95		202	70.038	283.658		202	290.79	628.473		202	116.582	219.711		202	273.059	49.281		202	75.357	206.594		202	69.151
203	90.872	33.673		203	53.193	319.967		203	92.645	394.287		203	114.366	505.225		203	115.252	57.169		203	145.395	62.591		203	167.116	110.549		203	70.038	279.222		203	290.79	638.951		203	116.582	231.783		203	273.059	48.987		203	75.357	205.941		203	69.151
204	90.872	34.015		204	53.193	331.825		204	92.645	393.746		204	114.366	497.027		204	115.252	56.4		204	145.395	64.93		204	167.116	111.95		204	70.038	285.532		204	290.79	635.311		204	116.582	225.331		204	273.059	48.135		204	75.357	207.076		204	69.151
205	90.872	35.795		205	53.193	315.292		205	92.645	383.995		205	114.366	503.318		205	115.252	55.573		205	145.395	65.101		205	167.116	110.544		205	70.038	275.677		205	290.79	640.59		205	116.582	220.342		205	273.059	47.838		205	75.357	203.324		205	69.151
206	90.872	35.824		206	53.193	320.075		206	92.645	392.847		206	114.366	513.12		206	115.252	62.173		206	145.395	62.78		206	167.116	113.623		206	70.038	284.519		206	290.79	634.238		206	116.582	233.049		206	273.059	50.05		206	75.357	205.941		206	69.151
207	90.872	34.937		207	53.193	341.875		207	92.645	393.713		207	114.366	510.791		207	115.252	58.265		207	145.395	67.942		207	167.116	111.56		207	70.038	269.019		207	290.79	625.823		207	116.582	227.027		207	273.059	51.216		207	75.357	215.388		207	69.151
208	90.872	34.629		208	53.193	327.825		208	92.645	393.603		208	114.366	497.186		208	115.252	59.704		208	145.395	67.872		208	167.116	111.719		208	70.038	270.886		208	290.79	637.823		208	116.582	229.452		208	273.059	51.575		208	75.357	205.882		208	69.151
209	90.872	35.576		209	53.193	333.183		209	92.645	396.904		209	114.366	508.105		209	115.252	59.662		209	145.395	62.207		209	167.116	110.21		209	70.038	286.981		209	290.79	635.023		209	116.582	221.996		209	273.059	48.258		209	75.357	202.394		209	69.151
210	90.872	36.639		210	53.193	330.233		210	92.645	390.129		210	114.366	509.977		210	115.252	56.719		210	145.395	64.53		210	167.116	109.175		210	70.038	278.43		210	290.79	629.934		210	116.582	213.498		210	273.059	51.485		210	75.357	218.629		210	69.151
211	90.872	34.185		211	53.193	327.6		211	92.645	392.01		211	114.366	504.229		211	115.252	57.119		211	145.395	65.759		211	167.116	110.196		211	70.038	273.266		211	290.79	625.919		211	116.582	229.403		211	273.059	49.487		211	75.357	209.529		211	69.151
212	90.872	35.966		212	53.193	335.8		212	92.645	392.368		212	114.366	503.279		212	115.252	57.642		212	145.395	66.497		212	167.116	114.926		212	70.038	272.259		212	290.79	644.675		212	116.582	223.042		212	273.059	48.698		212	75.357	208.888		212	69.151
213	90.872	38.239		213	53.193	319.758		213	92.645	386.986		213	114.366	499.403		213	115.252	57.458		213	145.395	65.665		213	167.116	113.085		213	70.038	279.785		213	290.79	637.258		213	116.582	222.529		213	273.059	50.032		213	75.357	213.576		213	69.151
214	90.872	35.873		214	53.193	332.142		214	92.645	400.933		214	114.366	511.531		214	115.252	55.042		214	145.395	63.576		214	167.116	106.653		214	70.038	269.937		214	290.79	638.088		214	116.582	215.875		214	273.059	48.237		214	75.357	205.459		214	69.151
215	90.872	34.849		215	53.193	322.017		215	92.645	403.445		215	114.366	519.295		215	115.252	60.15		215	145.395	62.305		215	167.116	114.796		215	70.038	276.709		215	290.79	632.064		215	116.582	221.886		215	273.059	49.466		215	75.357	212.759		215	69.151
216	90.872	36.444		216	53.193	325.558		216	92.645	392.077		216	114.366	514.895		216	115.252	57.981		216	145.395	65.649		216	167.116	107.785		216	70.038	272.892		216	290.79	635.267		216	116.582	224.35		216	273.059	49.536		216	75.357	202.818		216	69.151
217	90.872	34.146		217	53.193	312.258		217	92.645	394.799		217	114.366	500.469		217	115.252	59.635		217	145.395	65.418		217	167.116	109.382		217	70.038	278.924		217	290.79	638.613		217	116.582	226.791		217	273.059	46.956		217	75.357	205.853		217	69.151
218	90.872	33.756		218	53.193	326.933		218	92.645	392.933		218	114.366	501.496		218	115.252	58.662		218	145.395	65.451		218	167.116	111.464		218	70.038	267.772		218	290.79	631.441		218	116.582	235.916		218	273.059	48.357		218	75.357	194.859		218	69.151
219	90.872	35.966		219	53.193	319.425		219	92.645	397.895		219	114.366	502.14		219	115.252	61.781		219	145.395	64.866		219	167.116	108.119		219	70.038	271.494		219	290.79	640.666		219	116.582	228.331		219	273.059	48.216		219	75.357	207.206		219	69.151
220	90.872	34.059		220	53.193	319.717		220	92.645	372		220	114.366	506.934		220	115.252	58.742		220	145.395	65.643		220	167.116	110.43		220	70.038	267.614		220	290.79	641.622		220	116.582	225.989		220	273.059	49.414		220	75.357	209.835		220	69.151
221	90.872	34.834		221	53.193	329.742		221	92.645	395.928		221	114.366	507.159		221	115.252	60.619		221	145.395	66.652		221	167.116	110.385		221	70.038	274.722		221	290.79	635.613		221	116.582	234.722		221	273.059	49.312		221	75.357	210.476		221	69.151
222	90.872	33.254		222	53.193	347.092		222	92.645	391.665		222	114.366	500.419		222	115.252	59.546		222	145.395	67.79		222	167.116	111.408		222	70.038	262.437		222	290.79	635.465		222	116.582	234.129		222	273.059	51.193		222	75.357	207.512		222	69.151
223	90.872	34.849		223	53.193	332.717		223	92.645	392.383		223	114.366	504.767		223	115.252	57.504		223	145.395	64.119		223	167.116	109.066		223	70.038	268.652		223	290.79	639.052		223	116.582	240.072		223	273.059	47.567		223	75.357	206.941		223	69.151
224	90.872	34.371		224	53.193	336.392		224	92.645	387.541		224	114.366	503.109		224	115.252	54.004		224	145.395	67.104		224	167.116	108.064		224	70.038	273.829		224	290.79	643.462		224	116.582	229.35		224	273.059	49.627		224	75.357	207.582		224	69.151
225	90.872	36.502		225	53.193	333.542		225	92.645	385.263		225	114.366	498.333		225	115.252	57.412		225	145.395	69.107		225	167.116	111.241		225	70.038	274.38		225	290.79	629.919		225	116.582	225.274		225	273.059	46.88		225	75.357	205.624		225	69.151
226	90.872	35.2		226	53.193	340.5		226	92.645	386.388		226	114.366	510.609		226	115.252	61.204		226	145.395	63.277		226	167.116	106.401		226	70.038	269.703		226	290.79	642.816		226	116.582	226.426		226	273.059	47.328		226	75.357	211.218		226	69.151
227	90.872	34.561		227	53.193	318.158		227	92.645	388.478		227	114.366	506.849		227	115.252	58.619		227	145.395	66.54		227	167.116	104.382		227	70.038	268.386		227	290.79	638.441		227	116.582	234.703		227	273.059	48.705		227	75.357	210.035		227	69.151
228	90.872	34.937		228	53.193	322.442		228	92.645	386.962		228	114.366	493.767		228	115.252	62.592		228	145.395	65.567		228	167.116	108.321		228	70.038	272.184		228	290.79	633.968		228	116.582	234.342		228	273.059	46.597		228	75.357	209.729		228	69.151
229	90.872	34.141		229	53.193	322.4		229	92.645	390.402		229	114.366	501.287		229	115.252	59.738		229	145.395	62.308		229	167.116	107.735		229	70.038	273.082		229	290.79	630.2		229	116.582	224.141		229	273.059	49.81		229	75.357	206.147		229	69.151
230	90.872	36.01		230	53.193	337.35		230	92.645	388.005		230	114.366	505.686		230	115.252	57.781		230	145.395	66.845		230	167.116	110.692		230	70.038	266.994		230	290.79	635.043		230	116.582	226.365		230	273.059	48.323		230	75.357	207.271		230	69.151
231	90.872	34.6		231	53.193	332.642		231	92.645	383.306		231	114.366	501.085		231	115.252	60.254		231	145.395	65.72		231	167.116	106.459		231	70.038	269.766		231	290.79	635.331		231	116.582	235.186		231	273.059	46.854		231	75.357	211.941		231	69.151
232	90.872	33.722		232	53.193	312.608		232	92.645	377.153		232	114.366	510.411		232	115.252	56.762		232	145.395	65.271		232	167.116	108.08		232	70.038	270.399		232	290.79	646.034		232	116.582	228.586		232	273.059	48.856		232	75.357	214.882		232	69.151
233	90.872	35.395		233	53.193	333.975		233	92.645	386.66		233	114.366	528.643		233	115.252	61.919		233	145.395	64.716		233	167.116	106.867		233	70.038	262.703		233	290.79	633.838		233	116.582	225		233	273.059	48.269		233	75.357	217.606		233	69.151
234	90.872	33.956		234	53.193	312.983		234	92.645	371.928		234	114.366	505.783		234	115.252	57.45		234	145.395	63.729		234	167.116	106.841		234	70.038	268.494		234	290.79	628.817		234	116.582	232.011		234	273.059	49.494		234	75.357	212.329		234	69.151
235	90.872	35.19		235	53.193	323.117		235	92.645	380.206		235	114.366	502.609		235	115.252	59.704		235	145.395	63.287		235	167.116	106.735		235	70.038	267.07		235	290.79	633.808		235	116.582	235.802		235	273.059	47.854		235	75.357	206.941		235	69.151
236	90.872	34.015		236	53.193	325.092		236	92.645	369.541		236	114.366	508.167		236	115.252	57.777		236	145.395	65.168		236	167.116	109.387		236	70.038	258.215		236	290.79	631.848		236	116.582	223.042		236	273.059	49.312		236	75.357	213.588		236	69.151
237	90.872	35.634		237	53.193	317.342		237	92.645	378.895		237	114.366	498.946		237	115.252	58.985		237	145.395	63.284		237	167.116	108.621		237	70.038	281.405		237	290.79	633.838		237	116.582	231.677		237	273.059	47.799		237	75.357	210.624		237	69.151
238	90.872	36.932		238	53.193	323.892		238	92.645	391.837		238	114.366	511.752		238	115.252	56.115		238	145.395	65.116		238	167.116	106.194		238	70.038	261.367		238	290.79	632.953		238	116.582	227.89		238	273.059	46.732		238	75.357	209.924		238	69.151
239	90.872	37.702		239	53.193	326.125		239	92.645	392.124		239	114.366	504.605		239	115.252	59.369		239	145.395	64.963		239	167.116	110.178		239	70.038	271.772		239	290.79	635.668		239	116.582	223.658		239	273.059	47.649		239	75.357	214.647		239	69.151
240	90.872	34		240	53.193	329.892		240	92.645	389.603		240	114.366	510.845		240	115.252	60.896		240	145.395	62.854		240	167.116	109.119		240	70.038	268.525		240	290.79	634.306		240	116.582	224.688		240	273.059	47.791		240	75.357	212.941		240	69.151
241	90.872	33.493		241	53.193	318.975		241	92.645	388.177		241	114.366	509.45		241	115.252	59.854		241	145.395	63.567		241	167.116	114.557		241	70.038	278.43		241	290.79	631.598		241	116.582	230.954		241	273.059	48.544		241	75.357	214.435		241	69.151
242	90.872	34.449		242	53.193	318.008		242	92.645	379.636		242	114.366	508.953		242	115.252	58.631		242	145.395	63.518		242	167.116	112.159		242	70.038	271.19		242	290.79	634.245		242	116.582	217.084		242	273.059	49.245		242	75.357	209.806		242	69.151
243	90.872	35.727		243	53.193	321.325		243	92.645	378.206		243	114.366	501.554		243	115.252	55.8		243	145.395	62.686		243	167.116	110.936		243	70.038	263.335		243	290.79	651.169		243	116.582	232.243		243	273.059	48.318		243	75.357	218.982		243	69.151
244	90.872	33.941		244	53.193	316.967		244	92.645	368.603		244	114.366	508.705		244	115.252	55.542		244	145.395	68.668		244	167.116	108.316		244	70.038	263.968		244	290.79	638.281		244	116.582	226.658		244	273.059	47.942		244	75.357	212.635		244	69.151
245	90.872	34.263		245	53.193	321.45		245	92.645	374.014		245	114.366	504.453		245	115.252	63.477		245	145.395	63.473		245	167.116	102.321		245	70.038	252.753		245	290.79	631.884		245	116.582	223.734		245	273.059	48.032		245	75.357	213.294		245	69.151
246	90.872	37.024		246	53.193	318.992		246	92.645	384.938		246	114.366	509.167		246	115.252	61.212		246	145.395	64.448		246	167.116	108.91		246	70.038	256.304		246	290.79	633.688		246	116.582	234.065		246	273.059	50.385		246	75.357	211.976		246	69.151
247	90.872	37.141		247	53.193	315.933		247	92.645	370.077		247	114.366	517.535		247	115.252	61.754		247	145.395	65.784		247	167.116	110.347		247	70.038	266.835		247	290.79	624.527		247	116.582	224.772		247	273.059	47.753		247	75.357	211.788		247	69.151
248	90.872	35.093		248	53.193	311.517		248	92.645	365.876		248	114.366	521.934		248	115.252	59.904		248	145.395	64.823		248	167.116	112.204		248	70.038	264.715		248	290.79	637.096		248	116.582	231.103		248	273.059	49.07		248	75.357	206.694		248	69.151
249	90.872	37.029		249	53.193	318.392		249	92.645	372.732		249	114.366	516.822		249	115.252	61.488		249	145.395	64.229		249	167.116	107.271		249	70.038	266.373		249	290.79	640.89		249	116.582	226.43		249	273.059	49.547		249	75.357	216.941		249	69.151
250	90.872	35.22		250	53.193	322.633		250	92.645	380.78		250	114.366	515.112		250	115.252	61.027		250	145.395	66.101		250	167.116	109.753		250	70.038	259.468		250	290.79	635.165		250	116.582	223.167		250	273.059	47.409		250	75.357	205.788		250	69.151
251	90.872	34.927		251	53.193	322.025		251	92.645	384.306		251	114.366	526.857		251	115.252	59.638		251	145.395	66.421		251	167.116	105.727		251	70.038	276.032		251	290.79	633.227		251	116.582	225.243		251	273.059	48.893		251	75.357	203.665		251	69.151
252	90.872	36.322		252	53.193	323.458		252	92.645	384.254		252	114.366	500.647		252	115.252	60.588		252	145.395	62.021		252	167.116	108.541		252	70.038	275.215		252	290.79	636.979		252	116.582	224.384		252	273.059	47.226		252	75.357	202.365		252	69.151
253	90.872	35.615		253	53.193	319.083		253	92.645	384.426		253	114.366	527.031		253	115.252	57.973		253	145.395	64.101		253	167.116	110.984		253	70.038	264.5		253	290.79	639.377		253	116.582	227.103		253	273.059	46.515		253	75.357	208.841		253	69.151
254	90.872	35.054		254	53.193	331.65		254	92.645	389.837		254	114.366	519.5		254	115.252	62.073		254	145.395	62.591		254	167.116	105.966		254	70.038	262.076		254	290.79	633.819		254	116.582	227.278		254	273.059	48.506		254	75.357	210.553		254	69.151
255	90.872	31.698		255	53.193	328.042		255	92.645	383.014		255	114.366	523.45		255	115.252	63.712		255	145.395	63.162		255	167.116	107.623		255	70.038	259.101		255	290.79	631.819		255	116.582	223.878		255	273.059	48.737		255	75.357	211.229		255	69.151
256	90.872	34.751		256	53.193	308.067		256	92.645	403.928		256	114.366	514.593		256	115.252	61.338		256	145.395	63.405		256	167.116	110.918		256	70.038	262.937		256	290.79	633.68		256	116.582	225.973		256	273.059	47.373		256	75.357	213.559		256	69.151
257	90.872	35.863		257	53.193	324.858		257	92.645	401.359		257	114.366	517.942		257	115.252	60.712		257	145.395	62.771		257	167.116	108.408		257	70.038	266.19		257	290.79	637.207		257	116.582	231.643		257	273.059	46.341		257	75.357	217.912		257	69.151
258	90.872	34.341		258	53.193	322.458		258	92.645	395.105		258	114.366	512.787		258	115.252	59.904		258	145.395	62.552		258	167.116	106.382		258	70.038	263.481		258	290.79	629.093		258	116.582	237.696		258	273.059	46.83		258	75.357	219.359		258	69.151
259	90.872	33.351		259	53.193	337.9		259	92.645	406.091		259	114.366	517.934		259	115.252	61.408		259	145.395	66.655		259	167.116	110.687		259	70.038	259.595		259	290.79	637.956		259	116.582	229.376		259	273.059	45.956		259	75.357	216.953		259	69.151
260	90.872	38.985		260	53.193	320.517		260	92.645	400.014		260	114.366	521.078		260	115.252	56.4		260	145.395	59.759		260	167.116	109.883		260	70.038	269.006		260	290.79	634.781		260	116.582	233.198		260	273.059	48.279		260	75.357	206.782		260	69.151
261	90.872	35.454		261	53.193	333.633		261	92.645	398.388		261	114.366	526.174		261	115.252	60.265		261	145.395	63.348		261	167.116	109.979		261	70.038	269.354		261	290.79	632.579		261	116.582	222.863		261	273.059	47.813		261	75.357	212.482		261	69.151
262	90.872	34.898		262	53.193	310.4		262	92.645	412.115		262	114.366	524.62		262	115.252	61.296		262	145.395	65.851		262	167.116	112.531		262	70.038	265.525		262	290.79	631.232		262	116.582	234.802		262	273.059	47.185		262	75.357	212.371		262	69.151
263	90.872	34.893		263	53.193	309.15		263	92.645	392.962		263	114.366	513.488		263	115.252	60.962		263	145.395	66.177		263	167.116	110.286		263	70.038	269.475		263	290.79	622.425		263	116.582	233.163		263	273.059	46.992		263	75.357	218.582		263	69.151
264	90.872	32.761		264	53.193	322.292		264	92.645	392.88		264	114.366	517.849		264	115.252	60.523		264	145.395	67.067		264	167.116	108.183		264	70.038	267.728		264	290.79	626.849		264	116.582	227.894		264	273.059	47.646		264	75.357	213.647		264	69.151
265	90.872	36.82		265	53.193	331.117		265	92.645	402.589		265	114.366	516.841		265	115.252	58.827		265	145.395	63.662		265	167.116	113.255		265	70.038	258.386		265	290.79	624.264		265	116.582	227.878		265	273.059	46.713		265	75.357	204.282		265	69.151
266	90.872	34.405		266	53.193	319.925		266	92.645	403.923		266	114.366	519.636		266	115.252	58.688		266	145.395	62.561		266	167.116	108.981		266	70.038	256.778		266	290.79	633.381		266	116.582	222.118		266	273.059	50.023		266	75.357	210.435		266	69.151
267	90.872	36.156		267	53.193	328.083		267	92.645	396.584		267	114.366	505.488		267	115.252	60.558		267	145.395	62.155		267	167.116	109.401		267	70.038	266.354		267	290.79	633.436		267	116.582	230.452		267	273.059	47.552		267	75.357	206.841		267	69.151
268	90.872	34.054		268	53.193	319.85		268	92.645	410.263		268	114.366	524.07		268	115.252	63.008		268	145.395	63.692		268	167.116	107.942		268	70.038	259.956		268	290.79	632.715		268	116.582	232.567		268	273.059	47.045		268	75.357	199.941		268	69.151
269	90.872	36.517		269	53.193	319.642		269	92.645	398.038		269	114.366	513.012		269	115.252	59.654		269	145.395	62.473		269	167.116	111.613		269	70.038	265.424		269	290.79	641.992		269	116.582	227.221		269	273.059	50.218		269	75.357	207.129		269	69.151
270	90.872	35.649		270	53.193	318.25		270	92.645	403.225		270	114.366	517.903		270	115.252	59.631		270	145.395	64.756		270	167.116	109.833		270	70.038	267.747		270	290.79	637.006		270	116.582	230.544		270	273.059	48.307		270	75.357	203.471		270	69.151
271	90.872	31.561		271	53.193	314.267		271	92.645	418.478		271	114.366	526.143		271	115.252	57.088		271	145.395	64.948		271	167.116	112.347		271	70.038	245.437		271	290.79	643.119		271	116.582	239.665		271	273.059	47.409		271	75.357	207.965		271	69.151
272	90.872	34.073		272	53.193	317.05		272	92.645	401.407		272	114.366	512.919		272	115.252	58.046		272	145.395	63.018		272	167.116	114.305		272	70.038	268.968		272	290.79	641.515		272	116.582	229.589		272	273.059	45.903		272	75.357	206.482		272	69.151
273	90.872	35.824		273	53.193	314.992		273	92.645	403.986		273	114.366	522.194		273	115.252	58.015		273	145.395	63.89		273	167.116	111.761		273	70.038	252.835		273	290.79	635.471		273	116.582	228.008		273	273.059	46.877		273	75.357	201.159		273	69.151
274	90.872	34.907		274	53.193	307.942		274	92.645	413.502		274	114.366	517.477		274	115.252	57.512		274	145.395	63.68		274	167.116	111.271		274	70.038	265.475		274	290.79	641.578		274	116.582	230.772		274	273.059	48.023		274	75.357	211.8		274	69.151
275	90.872	33.327		275	53.193	309.583		275	92.645	412.622		275	114.366	513.787		275	115.252	57.942		275	145.395	64.54		275	167.116	114.586		275	70.038	255.481		275	290.79	635.748		275	116.582	235.175		275	273.059	47.779		275	75.357	199.971		275	69.151
276	90.872	34.146		276	53.193	311.867		276	92.645	419.44		276	114.366	529.977		276	115.252	60.019		276	145.395	62.146		276	167.116	113.22		276	70.038	249.734		276	290.79	633.851		276	116.582	235.749		276	273.059	47.646		276	75.357	207.553		276	69.151
277	90.872	34.127		277	53.193	322.783		277	92.645	415.091		277	114.366	509.973		277	115.252	58.142		277	145.395	63.058		277	167.116	107.09		277	70.038	259.291		277	290.79	630.531		277	116.582	237.487		277	273.059	47.349		277	75.357	197.582		277	69.151
278	90.872	34.615		278	53.193	322.358		278	92.645	421.23		278	114.366	509.977		278	115.252	55.388		278	145.395	61.372		278	167.116	112.658		278	70.038	267.095		278	290.79	631.122		278	116.582	233.658		278	273.059	45.644		278	75.357	206.447		278	69.151
279	90.872	35.78		279	53.193	301.6		279	92.645	416.115		279	114.366	513.775		279	115.252	60.3		279	145.395	58.454		279	167.116	114.077		279	70.038	265.652		279	290.79	638.062		279	116.582	224.411		279	273.059	45.969		279	75.357	204.635		279	69.151
280	90.872	34.059		280	53.193	312.075		280	92.645	438.129		280	114.366	492.314		280	115.252	58.708		280	145.395	64.024		280	167.116	106.318		280	70.038	260.38		280	290.79	634.061		280	116.582	238.901		280	273.059	43.909		280	75.357	203.424		280	69.151
281	90.872	33.507		281	53.193	311.808		281	92.645	423.555		281	114.366	484.035		281	115.252	61.869		281	145.395	65.369		281	167.116	107.175		281	70.038	258.468		281	290.79	644.974		281	116.582	231.616		281	273.059	45.032		281	75.357	210.006		281	69.151
282	90.872	33.088		282	53.193	312.8		282	92.645	427.287		282	114.366	487.698		282	115.252	59.758		282	145.395	62.418		282	167.116	108.769		282	70.038	257.532		282	290.79	630.998		282	116.582	235.662		282	273.059	44.3		282	75.357	202.959		282	69.151
283	90.872	35.82		283	53.193	323.175		283	92.645	435.77		283	114.366	484.624		283	115.252	56.923		283	145.395	62.875		283	167.116	108.565		283	70.038	267.557		283	290.79	631.521		283	116.582	234.924		283	273.059	45.487		283	75.357	203.141		283	69.151
284	90.872	35.185		284	53.193	324.642		284	92.645	416.981		284	114.366	477.88		284	115.252	59.077		284	145.395	62.015		284	167.116	108.074		284	70.038	254.899		284	290.79	635.54		284	116.582	239.323		284	273.059	46.617		284	75.357	202.906		284	69.151
285	90.872	34.556		285	53.193	320.8		285	92.645	433.842		285	114.366	480.484		285	115.252	60.9		285	145.395	58.652		285	167.116	109.225		285	70.038	261.203		285	290.79	629.585		285	116.582	232.038		285	273.059	45.315		285	75.357	195.741		285	69.151
286	90.872	34.122		286	53.193	311.942		286	92.645	431.847		286	114.366	470.422		286	115.252	58.773		286	145.395	68.201		286	167.116	111.127		286	70.038	254.044		286	290.79	629.566		286	116.582	237.148		286	273.059	44.489		286	75.357	196.947		286	69.151
287	90.872	33.766		287	53.193	320.133		287	92.645	424.148		287	114.366	454.45		287	115.252	59.162		287	145.395	62.482		287	167.116	105.923		287	70.038	264.266		287	290.79	633.86		287	116.582	229.175		287	273.059	45.349		287	75.357	193.488		287	69.151
288	90.872	36.38		288	53.193	316.783		288	92.645	448.895		288	114.366	451.027		288	115.252	60.212		288	145.395	63.473		288	167.116	106.727		288	70.038	255.291		288	290.79	635.866		288	116.582	232.913		288	273.059	47.385		288	75.357	201.618		288	69.151
289	90.872	34.741		289	53.193	315.692		289	92.645	422.421		289	114.366	460.585		289	115.252	61.085		289	145.395	61.36		289	167.116	108.65		289	70.038	260.709		289	290.79	633.091		289	116.582	237.373		289	273.059	46.081		289	75.357	196.406		289	69.151
290	90.872	33.532		290	53.193	319.917		290	92.645	431.66		290	114.366	465.717		290	115.252	58.112		290	145.395	63.262		290	167.116	107.573		290	70.038	258.899		290	290.79	631.671		290	116.582	231.262		290	273.059	46.445		290	75.357	201.9		290	69.151
291	90.872	34.917		291	53.193	306.142		291	92.645	444.469		291	114.366	465.953		291	115.252	59.05		291	145.395	61.619		291	167.116	111.18		291	70.038	267.854		291	290.79	630.489		291	116.582	229.411		291	273.059	48.01		291	75.357	195.7		291	69.151
292	90.872	35.917		292	53.193	305.358		292	92.645	434.306		292	114.366	480.163		292	115.252	57.735		292	145.395	64.707		292	167.116	109.188		292	70.038	266.437		292	290.79	633.902		292	116.582	225.525		292	273.059	46.977		292	75.357	198.6		292	69.151
293	90.872	33.839		293	53.193	327.15		293	92.645	425.904		293	114.366	485.306		293	115.252	59.765		293	145.395	62.07		293	167.116	107.782		293	70.038	259.013		293	290.79	636.401		293	116.582	236.156		293	273.059	45.864		293	75.357	194.224		293	69.151
294	90.872	36.351		294	53.193	317.083		294	92.645	445.498		294	114.366	494.357		294	115.252	57.5		294	145.395	62.768		294	167.116	108.122		294	70.038	258.614		294	290.79	628.238		294	116.582	227.422		294	273.059	46.825		294	75.357	202.882		294	69.151
295	90.872	33.834		295	53.193	324.1		295	92.645	430.746		295	114.366	493.403		295	115.252	59.146		295	145.395	62.345		295	167.116	111.353		295	70.038	251.734		295	290.79	624.936		295	116.582	224.821		295	273.059	47.531		295	75.357	196.406		295	69.151
296	90.872	36.137		296	53.193	321.842		296	92.645	439.536		296	114.366	508.027		296	115.252	57.915		296	145.395	61.198		296	167.116	109.57		296	70.038	247.095		296	290.79	620.689		296	116.582	226.741		296	273.059	45.568		296	75.357	199.359		296	69.151
297	90.872	34.468		297	53.193	319.4		297	92.645	426.517		297	114.366	503.942		297	115.252	57.073		297	145.395	61.689		297	167.116	111.095		297	70.038	258.354		297	290.79	620.922		297	116.582	239.464		297	273.059	45.791		297	75.357	199.8		297	69.151
298	90.872	34.668		298	53.193	321.692		298	92.645	433.866		298	114.366	511.093		298	115.252	56.458		298	145.395	62.744		298	167.116	110.366		298	70.038	252.519		298	290.79	624.566		298	116.582	234.787		298	273.059	45.013		298	75.357	196.782		298	69.151
299	90.872	36.371		299	53.193	305.033		299	92.645	438.258		299	114.366	505.686		299	115.252	59.488		299	145.395	61.277		299	167.116	109.804		299	70.038	262.108		299	290.79	607.456		299	116.582	224.456		299	273.059	46.964		299	75.357	200.271		299	69.151
300	90.872	35.341		300	53.193	327.775		300	92.645	426.325		300	114.366	527.694		300	115.252	59.338		300	145.395	61.223		300	167.116	108.308		300	70.038	253.854		300	290.79	608.779		300	116.582	230.437		300	273.059	46.042		300	75.357	202.124		300	69.151
301	90.872	35.605		301	53.193	327.15		301	92.645	434.957		301	114.366	506.457		301	115.252	58.212		301	145.395	61.595		301	167.116	109.544		301	70.038	253.785		301	290.79	610.976		301	116.582	228.43		301	273.059	45.87		301	75.357	203.459		301	69.151
302	90.872	34.288		302	53.193	324.65		302	92.645	425.952		302	114.366	509.841		302	115.252	59.765		302	145.395	61.753		302	167.116	112.69		302	70.038	251.354		302	290.79	611.581		302	116.582	226.871		302	273.059	47.287		302	75.357	198.618		302	69.151
303	90.872	35.634		303	53.193	316.092		303	92.645	439.067		303	114.366	500.128		303	115.252	57.85		303	145.395	63.357		303	167.116	109.507		303	70.038	246.234		303	290.79	607.192		303	116.582	233.7		303	273.059	46.289		303	75.357	201.782		303	69.151
304	90.872	36.595		304	53.193	323.192		304	92.645	423.904		304	114.366	505.872		304	115.252	58.115		304	145.395	60.915		304	167.116	108.462		304	70.038	249.31		304	290.79	616.59		304	116.582	223.833		304	273.059	46.433		304	75.357	194.788		304	69.151
305	90.872	34.556		305	53.193	315.758		305	92.645	433.057		305	114.366	512.795		305	115.252	57.577		305	145.395	59.524		305	167.116	107.814		305	70.038	250.918		305	290.79	619.238		305	116.582	233.973		305	273.059	46.998		305	75.357	202.629		305	69.151
306	90.872	35.59		306	53.193	331.517		306	92.645	417.383		306	114.366	499.682		306	115.252	58.942		306	145.395	62.201		306	167.116	108.69		306	70.038	244.329		306	290.79	616.684		306	116.582	224.506		306	273.059	45.945		306	75.357	195.659		306	69.151
307	90.872	36.18		307	53.193	313.208		307	92.645	427.627		307	114.366	509.376		307	115.252	56.227		307	145.395	63		307	167.116	106.719		307	70.038	251.291		307	290.79	616.178		307	116.582	239.764		307	273.059	47.099		307	75.357	207.324		307	69.151
308	90.872	34.215		308	53.193	320.783		308	92.645	424.44		308	114.366	517.07		308	115.252	58.073		308	145.395	61.241		308	167.116	106.233		308	70.038	256.633		308	290.79	624.721		308	116.582	237.068		308	273.059	46.065		308	75.357	203.118		308	69.151
309	90.872	34.517		309	53.193	321.333		309	92.645	426.751		309	114.366	517.105		309	115.252	56.915		309	145.395	60.787		309	167.116	114.419		309	70.038	260.671		309	290.79	628.922		309	116.582	232.357		309	273.059	46.747		309	75.357	198.747		309	69.151
310	90.872	36.698		310	53.193	309.517		310	92.645	422.364		310	114.366	513.461		310	115.252	58.258		310	145.395	62.079		310	167.116	106.873		310	70.038	263.797		310	290.79	637.883		310	116.582	229.137		310	273.059	45.503		310	75.357	196.759		310	69.151
311	90.872	35.532		311	53.193	329.417		311	92.645	411.608		311	114.366	516.171		311	115.252	57.127		311	145.395	60.756		311	167.116	109.085		311	70.038	248.278		311	290.79	623.867		311	116.582	229.909		311	273.059	46.336		311	75.357	200.771		311	69.151
312	90.872	35.776		312	53.193	324.775		312	92.645	402.225		312	114.366	525.725		312	115.252	57.1		312	145.395	57.759		312	167.116	109.541		312	70.038	241.5		312	290.79	627.974		312	116.582	222.947		312	273.059	45.339		312	75.357	189.347		312	69.151
313	90.872	33.683		313	53.193	324.242		313	92.645	410.129		313	114.366	513.078		313	115.252	56.942		313	145.395	62.869		313	167.116	107.546		313	70.038	255.968		313	290.79	626.477		313	116.582	229.369		313	273.059	44.748		313	75.357	195.865		313	69.151
314	90.872	34.517		314	53.193	309.058		314	92.645	410.833		314	114.366	514.027		314	115.252	59.523		314	145.395	62.668		314	167.116	106.687		314	70.038	247.703		314	290.79	616.873		314	116.582	231.403		314	273.059	46.398		314	75.357	195.571		314	69.151
315	90.872	33.22		315	53.193	331.283		315	92.645	413.44		315	114.366	520.5		315	115.252	56.804		315	145.395	62.677		315	167.116	110.39		315	70.038	253.114		315	290.79	621.936		315	116.582	229.259		315	273.059	46.679		315	75.357	203.071		315	69.151
316	90.872	33.649		316	53.193	319.742		316	92.645	416.746		316	114.366	530.279		316	115.252	57.962		316	145.395	62.521		316	167.116	109.976		316	70.038	248.873		316	290.79	623.59		316	116.582	232.768		316	273.059	45.739		316	75.357	191.482		316	69.151
317	90.872	35.073		317	53.193	330.15		317	92.645	409.144		317	114.366	520.934		317	115.252	60.142		317	145.395	60.396		317	167.116	108.085		317	70.038	250.81		317	290.79	622.63		317	116.582	235.209		317	273.059	48.091		317	75.357	199.3		317	69.151
318	90.872	34.615		318	53.193	328.333		318	92.645	409.335		318	114.366	528.143		318	115.252	59.804		318	145.395	61.415		318	167.116	110.255		318	70.038	256.601		318	290.79	625.438		318	116.582	225.589		318	273.059	45.096		318	75.357	195.118		318	69.151
319	90.872	34.029		319	53.193	313.517		319	92.645	421.402		319	114.366	522.806		319	115.252	58.162		319	145.395	61.07		319	167.116	105.899		319	70.038	253.329		319	290.79	625.585		319	116.582	230.103		319	273.059	45.149		319	75.357	207.176		319	69.151
320	90.872	36.444		320	53.193	316.058		320	92.645	417.254		320	114.366	521.721		320	115.252	58.296		320	145.395	59.936		320	167.116	108.724		320	70.038	245.835		320	290.79	629.811		320	116.582	236.544		320	273.059	47.058		320	75.357	194.976		320	69.151
321	90.872	36.473		321	53.193	301.192		321	92.645	428.33		321	114.366	519.295		321	115.252	56.854		321	145.395	61.985		321	167.116	107		321	70.038	244.627		321	290.79	631.253		321	116.582	234.506		321	273.059	46.255		321	75.357	202.582		321	69.151
322	90.872	34.42		322	53.193	308.617		322	92.645	408		322	114.366	518.601		322	115.252	56.704		322	145.395	58.997		322	167.116	110.406		322	70.038	245.133		322	290.79	635.86		322	116.582	224.688		322	273.059	45.698		322	75.357	199.476		322	69.151
323	90.872	35.824		323	53.193	312.2		323	92.645	413.541		323	114.366	518.771		323	115.252	61.373		323	145.395	58.799		323	167.116	110.708		323	70.038	250.741		323	290.79	623.931		323	116.582	232.068		323	273.059	46.981		323	75.357	202.359		323	69.151
324	90.872	33.854		324	53.193	321.15		324	92.645	402.086		324	114.366	519.698		324	115.252	58.796		324	145.395	61.125		324	167.116	105.973		324	70.038	250.095		324	290.79	614.893		324	116.582	225.776		324	273.059	46.39		324	75.357	199.806		324	69.151
325	90.872	34.888		325	53.193	321.2		325	92.645	417.043		325	114.366	527.554		325	115.252	57.631		325	145.395	61.488		325	167.116	106.79		325	70.038	246.994		325	290.79	621.942		325	116.582	238.646		325	273.059	46.471		325	75.357	204.459		325	69.151
326	90.872	33.498		326	53.193	304.133		326	92.645	419.215		326	114.366	535.729		326	115.252	58.358		326	145.395	64.713		326	167.116	109.212		326	70.038	245.696		326	290.79	611.343		326	116.582	225.848		326	273.059	46.347		326	75.357	206.694		326	69.151
327	90.872	34.371		327	53.193	321.642		327	92.645	404.904		327	114.366	521.523		327	115.252	58.469		327	145.395	60.799		327	167.116	110.141		327	70.038	230.437		327	290.79	611.747		327	116.582	230.004		327	273.059	46.744		327	75.357	208.118		327	69.151
328	90.872	35.205		328	53.193	314.833		328	92.645	409.694		328	114.366	517.236		328	115.252	57.773		328	145.395	59.64		328	167.116	106.531		328	70.038	241.127		328	290.79	611.867		328	116.582	236.289		328	273.059	45.753		328	75.357	205.182		328	69.151
329	90.872	35.946		329	53.193	307.183		329	92.645	401.641		329	114.366	515.085		329	115.252	55.104		329	145.395	59.887		329	167.116	106.111		329	70.038	237.804		329	290.79	621.662		329	116.582	227.281		329	273.059	44.74		329	75.357	199.982		329	69.151
330	90.872	35.722		330	53.193	317.408		330	92.645	415.713		330	114.366	535.996		330	115.252	57.712		330	145.395	59.924		330	167.116	107.393		330	70.038	252.595		330	290.79	612.233		330	116.582	231.057		330	273.059	47.571		330	75.357	185.459		330	69.151
331	90.872	34.941		331	53.193	304.242		331	92.645	410.081		331	114.366	524.163		331	115.252	53.546		331	145.395	60.912		331	167.116	107.26		331	70.038	250.076		331	290.79	616.878		331	116.582	238.156		331	273.059	46.289		331	75.357	196.524		331	69.151
332	90.872	34.873		332	53.193	312.675		332	92.645	411.933		332	114.366	525.26		332	115.252	55.696		332	145.395	59.119		332	167.116	103.833		332	70.038	245.411		332	290.79	611.344		332	116.582	226.019		332	273.059	46.294		332	75.357	204.576		332	69.151
333	90.872	35.639		333	53.193	318.458		333	92.645	405.531		333	114.366	520.926		333	115.252	57.658		333	145.395	60.338		333	167.116	103.907		333	70.038	245.468		333	290.79	626.575		333	116.582	233.209		333	273.059	46.56		333	75.357	199.041		333	69.151
334	90.872	32.473		334	53.193	302.733		334	92.645	400.431		334	114.366	522.058		334	115.252	55.062		334	145.395	58.845		334	167.116	104.416		334	70.038	250.449		334	290.79	615.034		334	116.582	225.194		334	273.059	44.627		334	75.357	201.047		334	69.151
335	90.872	31.941		335	53.193	312.625		335	92.645	406.478		335	114.366	526.12		335	115.252	56.919		335	145.395	61.204		335	167.116	105.581		335	70.038	243.411		335	290.79	617.101		335	116.582	230.715		335	273.059	45.136		335	75.357	206.953		335	69.151
336	90.872	33.424		336	53.193	310.15		336	92.645	408.091		336	114.366	513.612		336	115.252	56.977		336	145.395	62.43		336	167.116	105.159		336	70.038	240.146		336	290.79	614.312		336	116.582	231.399		336	273.059	44.078		336	75.357	193.306		336	69.151
337	90.872	36.024		337	53.193	305.35		337	92.645	405.804		337	114.366	526.857		337	115.252	56.454		337	145.395	64.314		337	167.116	108.424		337	70.038	241.848		337	290.79	616.035		337	116.582	229		337	273.059	46		337	75.357	204.865		337	69.151
338	90.872	35.322		338	53.193	306.867		338	92.645	414.665		338	114.366	520.512		338	115.252	59.288		338	145.395	65.125		338	167.116	102.594		338	70.038	229.304		338	290.79	618.707		338	116.582	232.711		338	273.059	46.583		338	75.357	198.065		338	69.151
339	90.872	34.395		339	53.193	302.508		339	92.645	416.775		339	114.366	520.647		339	115.252	57.269		339	145.395	61.902		339	167.116	110.371		339	70.038	244.171		339	290.79	614.861		339	116.582	237.521		339	273.059	46.742		339	75.357	198.935		339	69.151
340	90.872	35.834		340	53.193	306.683		340	92.645	411.153		340	114.366	508.182		340	115.252	54.062		340	145.395	57.866		340	167.116	106.244		340	70.038	243.538		340	290.79	622.573		340	116.582	228.616		340	273.059	46.984		340	75.357	205.241		340	69.151
341	90.872	34.624		341	53.193	314.767		341	92.645	407.287		341	114.366	509.938		341	115.252	58.335		341	145.395	59.027		341	167.116	107.788		341	70.038	233.854		341	290.79	606.912		341	116.582	235.753		341	273.059	46.924		341	75.357	195.818		341	69.151
342	90.872	32.395		342	53.193	293.417		342	92.645	402.478		342	114.366	518.461		342	115.252	60.215		342	145.395	61.21		342	167.116	104.451		342	70.038	242.342		342	290.79	614.098		342	116.582	230.068		342	273.059	46.641		342	75.357	200.441		342	69.151
343	90.872	36.254		343	53.193	296.483		343	92.645	418.651		343	114.366	515.496		343	115.252	58.592		343	145.395	60.631		343	167.116	107.101		343	70.038	247.424		343	290.79	613.404		343	116.582	231.513		343	273.059	46.675		343	75.357	195.106		343	69.151
344	90.872	35.502		344	53.193	310.908		344	92.645	397.823		344	114.366	519.554		344	115.252	57.869		344	145.395	58.735		344	167.116	104.889		344	70.038	245.646		344	290.79	622.328		344	116.582	226.559		344	273.059	45.933		344	75.357	195.688		344	69.151
345	90.872	33.659		345	53.193	312.083		345	92.645	415.522		345	114.366	521.194		345	115.252	59.012		345	145.395	62.881		345	167.116	106.782		345	70.038	241.228		345	290.79	623.23		345	116.582	232.255		345	273.059	47.156		345	75.357	197.876		345	69.151
346	90.872	35.434		346	53.193	297.475		346	92.645	401.603		346	114.366	513.686		346	115.252	54		346	145.395	60.613		346	167.116	108.501		346	70.038	256.146		346	290.79	621.656		346	116.582	230.479		346	273.059	45.359		346	75.357	198.065		346	69.151
347	90.872	34.888		347	53.193	300.158		347	92.645	406.809		347	114.366	518.035		347	115.252	59.508		347	145.395	59.47		347	167.116	105.706		347	70.038	241.589		347	290.79	615.688		347	116.582	228.175		347	273.059	44.961		347	75.357	203.288		347	69.151
348	90.872	32.483		348	53.193	302.175		348	92.645	404.402		348	114.366	511.818		348	115.252	56.169		348	145.395	61.168		348	167.116	103.271		348	70.038	232.861		348	290.79	608.174		348	116.582	235.833		348	273.059	44.779		348	75.357	205.259		348	69.151
349	90.872	34.478		349	53.193	304.983		349	92.645	421.411		349	114.366	508.86		349	115.252	56.354		349	145.395	62.982		349	167.116	105.125		349	70.038	237.677		349	290.79	618.308		349	116.582	235.913		349	273.059	45.615		349	75.357	200.124		349	69.151
350	90.872	33.668		350	53.193	291.05		350	92.645	402.177		350	114.366	510.961		350	115.252	55.281		350	145.395	63.863		350	167.116	106.873		350	70.038	241.791		350	290.79	617.011		350	116.582	232.061		350	273.059	44.945		350	75.357	200.382		350	69.151
351	90.872	34.078		351	53.193	306.15		351	92.645	414.278		351	114.366	524.965		351	115.252	62.504		351	145.395	61.207		351	167.116	107.297		351	70.038	240.557		351	290.79	620.306		351	116.582	221.593		351	273.059	45.794		351	75.357	201.188		351	69.151
352	90.872	34.4		352	53.193	301.225		352	92.645	407.737		352	114.366	519.95		352	115.252	58.435		352	145.395	62.174		352	167.116	104.546		352	70.038	247.228		352	290.79	612.873		352	116.582	231.144		352	273.059	43.601		352	75.357	190.059		352	69.151
353	90.872	35.966		353	53.193	303.975		353	92.645	400.512		353	114.366	513.306		353	115.252	56.9		353	145.395	61.183		353	167.116	105.79		353	70.038	230.532		353	290.79	634.274		353	116.582	236.608		353	273.059	45.955		353	75.357	189.976		353	69.151
354	90.872	36.434		354	53.193	295.692		354	92.645	405.598		354	114.366	521		354	115.252	55.658		354	145.395	59.927		354	167.116	105.769		354	70.038	242.082		354	290.79	609.841		354	116.582	230.593		354	273.059	45.516		354	75.357	198.288		354	69.151
355	90.872	34.688		355	53.193	308		355	92.645	409.455		355	114.366	517.287		355	115.252	58.981		355	145.395	58.866		355	167.116	105.78		355	70.038	238.31		355	290.79	617.733		355	116.582	226.129		355	273.059	44.917		355	75.357	203.835		355	69.151
356	90.872	36.18		356	53.193	295.583		356	92.645	403.206		356	114.366	520.151		356	115.252	55.523		356	145.395	61.293		356	167.116	107.944		356	70.038	239.462		356	290.79	618.517		356	116.582	228.616		356	273.059	43.83		356	75.357	198.994		356	69.151
357	90.872	34.58		357	53.193	318.925		357	92.645	407.923		357	114.366	524.86		357	115.252	57.085		357	145.395	62.091		357	167.116	104.804		357	70.038	238.133		357	290.79	616.968		357	116.582	228.768		357	273.059	45.955		357	75.357	198.771		357	69.151
358	90.872	34.722		358	53.193	324.458		358	92.645	409.364		358	114.366	517.279		358	115.252	58.177		358	145.395	61.003		358	167.116	108.981		358	70.038	228.563		358	290.79	605.407		358	116.582	230.038		358	273.059	46.541		358	75.357	195.7		358	69.151
359	90.872	35.044		359	53.193	309.158		359	92.645	414.488		359	114.366	513.442		359	115.252	58.431		359	145.395	61.985		359	167.116	101.228		359	70.038	232.475		359	290.79	617.192		359	116.582	227.308		359	273.059	46.985		359	75.357	194.053		359	69.151
360	90.872	33.98		360	53.193	308.933		360	92.645	411.105		360	114.366	511.709		360	115.252	57.127		360	145.395	64.183		360	167.116	102.467		360	70.038	233.835		360	290.79	609.698		360	116.582	231.996		360	273.059	45.638		360	75.357	203.224		360	69.151
361	90.872	35.654		361	53.193	322.008		361	92.645	414.325		361	114.366	513.143		361	115.252	55.977		361	145.395	62.143		361	167.116	104.164		361	70.038	244.892		361	290.79	615.198		361	116.582	228.798		361	273.059	45.138		361	75.357	193.512		361	69.151
362	90.872	35.088		362	53.193	317.508		362	92.645	417.679		362	114.366	521.69		362	115.252	56.988		362	145.395	58.497		362	167.116	108.196		362	70.038	230.709		362	290.79	608.108		362	116.582	230.795		362	273.059	46.89		362	75.357	204.612		362	69.151
363	90.872	36.259		363	53.193	315.408		363	92.645	417.378		363	114.366	512.57		363	115.252	57.442		363	145.395	62.963		363	167.116	109.257		363	70.038	240.81		363	290.79	613.584		363	116.582	237.388		363	273.059	45.302		363	75.357	207.747		363	69.151
364	90.872	37.02		364	53.193	304.658		364	92.645	399.301		364	114.366	504.787		364	115.252	52.604		364	145.395	61.238		364	167.116	108.228		364	70.038	246.222		364	290.79	606.808		364	116.582	233.316		364	273.059	45.869		364	75.357	202.376		364	69.151
365	90.872	35.39		365	53.193	316.1		365	92.645	417.99		365	114.366	511.233		365	115.252	56.888		365	145.395	62.274		365	167.116	107.851		365	70.038	249.665		365	290.79	618.169		365	116.582	230.875		365	273.059	45.765		365	75.357	202.388		365	69.151
366	90.872	34.517		366	53.193	312.392		366	92.645	418.67		366	114.366	518.636		366	115.252	57.846		366	145.395	60.607		366	167.116	102.459		366	70.038	236.43		366	290.79	619.258		366	116.582	233.783		366	273.059	47.193		366	75.357	202.359		366	69.151
367	90.872	35.698		367	53.193	302.717		367	92.645	416.024		367	114.366	517.527		367	115.252	54.531		367	145.395	59.107		367	167.116	106.724		367	70.038	249.177		367	290.79	619.854		367	116.582	236.81		367	273.059	46.81		367	75.357	194.194		367	69.151
368	90.872	33.99		368	53.193	307.875		368	92.645	415.579		368	114.366	514.651		368	115.252	56.8		368	145.395	61.067		368	167.116	104.469		368	70.038	231.639		368	290.79	611.947		368	116.582	236.373		368	273.059	47.617		368	75.357	197.482		368	69.151
369	90.872	36.732		369	53.193	316		369	92.645	426.675		369	114.366	506.407		369	115.252	54.196		369	145.395	58.646		369	167.116	105.915		369	70.038	233.595		369	290.79	599.698		369	116.582	235.578		369	273.059	45.214		369	75.357	193.871		369	69.151
370	90.872	35.439		370	53.193	315.85		370	92.645	406.675		370	114.366	499.698		370	115.252	57.708		370	145.395	59.488		370	167.116	104.016		370	70.038	229.576		370	290.79	617.169		370	116.582	243.087		370	273.059	46.175		370	75.357	196.182		370	69.151
371	90.872	35.102		371	53.193	308.892		371	92.645	415.876		371	114.366	519.636		371	115.252	59.546		371	145.395	59.976		371	167.116	106.345		371	70.038	231.234		371	290.79	611.719		371	116.582	232.133		371	273.059	44.953		371	75.357	202.547		371	69.151
372	90.872	35.595		372	53.193	321.6		372	92.645	409.086		372	114.366	510.981		372	115.252	56.319		372	145.395	57.96		372	167.116	104.202		372	70.038	223.215		372	290.79	612.912		372	116.582	232.825		372	273.059	45.075		372	75.357	203.747		372	69.151
373	90.872	34.18		373	53.193	310.492		373	92.645	416.081		373	114.366	497.473		373	115.252	57.927		373	145.395	59.293		373	167.116	109.48		373	70.038	250.741		373	290.79	607.091		373	116.582	238.84		373	273.059	46.838		373	75.357	191.865		373	69.151
374	90.872	35.946		374	53.193	304.8		374	92.645	419.349		374	114.366	512.911		374	115.252	54.969		374	145.395	62.238		374	167.116	108.859		374	70.038	232.361		374	290.79	606.111		374	116.582	230.54		374	273.059	44.38		374	75.357	199.876		374	69.151
375	90.872	35.327		375	53.193	303.325		375	92.645	404.804		375	114.366	504.973		375	115.252	57.065		375	145.395	60.97		375	167.116	104.533		375	70.038	238.551		375	290.79	606.48		375	116.582	239.817		375	273.059	45.474		375	75.357	205.129		375	69.151
376	90.872	33.42		376	53.193	315.25		376	92.645	416.612		376	114.366	500.88		376	115.252	53.638		376	145.395	57.835		376	167.116	103.456		376	70.038	236.905		376	290.79	607.18		376	116.582	238.361		376	273.059	46.42		376	75.357	194.188		376	69.151
377	90.872	34.4		377	53.193	303.642		377	92.645	421.301		377	114.366	510.484		377	115.252	58.038		377	145.395	57.893		377	167.116	104.39		377	70.038	234.449		377	290.79	610.776		377	116.582	239.658		377	273.059	45.641		377	75.357	190.618		377	69.151
378	90.872	31.517		378	53.193	314.633		378	92.645	409.756		378	114.366	494.744		378	115.252	56.896		378	145.395	60.591		378	167.116	101.228		378	70.038	242.076		378	290.79	609.726		378	116.582	231.669		378	273.059	45.091		378	75.357	199.347		378	69.151
379	90.872	34.468		379	53.193	306.358		379	92.645	412.378		379	114.366	501.671		379	115.252	55.231		379	145.395	56.445		379	167.116	105.271		379	70.038	232.253		379	290.79	607.639		379	116.582	239.605		379	273.059	45.58		379	75.357	189.471		379	69.151
380	90.872	34.468		380	53.193	310.108		380	92.645	401.306		380	114.366	497.492		380	115.252	55.096		380	145.395	59.866		380	167.116	102.859		380	70.038	237.158		380	290.79	614.341		380	116.582	238.555		380	273.059	44.992		380	75.357	201.324		380	69.151
381	90.872	36.971		381	53.193	304.833		381	92.645	405.976		381	114.366	499.748		381	115.252	56.727		381	145.395	62.39		381	167.116	101.637		381	70.038	234.494		381	290.79	612.389		381	116.582	239.669		381	273.059	47.065		381	75.357	201.188		381	69.151
382	90.872	35.766		382	53.193	305.433		382	92.645	392.488		382	114.366	502.24		382	115.252	59.392		382	145.395	62.433		382	167.116	103.618		382	70.038	238.329		382	290.79	621.991		382	116.582	230.304		382	273.059	46.5		382	75.357	199.247		382	69.151
383	90.872	34.171		383	53.193	301.642		383	92.645	411.679		383	114.366	508.132		383	115.252	58.381		383	145.395	60.369		383	167.116	101.069		383	70.038	239.835		383	290.79	611.877		383	116.582	233.84		383	273.059	46.081		383	75.357	198.624		383	69.151
384	90.872	34.244		384	53.193	309.442		384	92.645	401.722		384	114.366	508.636		384	115.252	55.046		384	145.395	57.216		384	167.116	109.737		384	70.038	238.082		384	290.79	614.848		384	116.582	241.27		384	273.059	46.312		384	75.357	199.824		384	69.151
385	90.872	35.346		385	53.193	305.958		385	92.645	407.129		385	114.366	507.574		385	115.252	56.235		385	145.395	59.101		385	167.116	101.828		385	70.038	233.633		385	290.79	616.5		385	116.582	229.346		385	273.059	46.146		385	75.357	195.635		385	69.151
386	90.872	34.937		386	53.193	308.183		386	92.645	401.646		386	114.366	513.391		386	115.252	56.515		386	145.395	59.64		386	167.116	105.732		386	70.038	232.411		386	290.79	595.312		386	116.582	230.878		386	273.059	46.82		386	75.357	203.541		386	69.151
387	90.872	34.42		387	53.193	302.525		387	92.645	413.947		387	114.366	514.671		387	115.252	55.158		387	145.395	57.628		387	167.116	103.191		387	70.038	245.241		387	290.79	609.111		387	116.582	227.308		387	273.059	45.856		387	75.357	196.429		387	69.151
388	90.872	33.917		388	53.193	304.325		388	92.645	407.751		388	114.366	520.76		388	115.252	58.012		388	145.395	58.009		388	167.116	104.581		388	70.038	245.158		388	290.79	601.974		388	116.582	232.939		388	273.059	45.096		388	75.357	205.365		388	69.151
389	90.872	37.546		389	53.193	300.917		389	92.645	422.057		389	114.366	501.992		389	115.252	55.208		389	145.395	58.588		389	167.116	104.557		389	70.038	234.975		389	290.79	609.229		389	116.582	225.726		389	273.059	43.333		389	75.357	194.935		389	69.151
390	90.872	35.644		390	53.193	285.942		390	92.645	412.431		390	114.366	504.446		390	115.252	54.712		390	145.395	57.75		390	167.116	102.377		390	70.038	234.468		390	290.79	604.796		390	116.582	219.148		390	273.059	43.586		390	75.357	208.565		390	69.151
391	90.872	35.556		391	53.193	302.467		391	92.645	415.589		391	114.366	510.213		391	115.252	54.977		391	145.395	58.549		391	167.116	104.623		391	70.038	246.589		391	290.79	611.838		391	116.582	228.456		391	273.059	44.995		391	75.357	193.712		391	69.151
392	90.872	32.659		392	53.193	297.092		392	92.645	406.526		392	114.366	511.527		392	115.252	55.042		392	145.395	59.015		392	167.116	99.92		392	70.038	242.468		392	290.79	613.671		392	116.582	224.061		392	273.059	43.188		392	75.357	198.959		392	69.151
393	90.872	34.385		393	53.193	289.842		393	92.645	414.986		393	114.366	504.058		393	115.252	55.112		393	145.395	58.796		393	167.116	104.777		393	70.038	245.513		393	290.79	615.282		393	116.582	223.719		393	273.059	42.37		393	75.357	203.229		393	69.151
394	90.872	37.585		394	53.193	290.242		394	92.645	411.139		394	114.366	513.771		394	115.252	54.842		394	145.395	61.555		394	167.116	100.825		394	70.038	236.304		394	290.79	618.13		394	116.582	233.825		394	273.059	44.575		394	75.357	193.535		394	69.151
395	90.872	34.556		395	53.193	296.075		395	92.645	427.086		395	114.366	507.833		395	115.252	55.823		395	145.395	57.354		395	167.116	107.918		395	70.038	236.956		395	290.79	621.66		395	116.582	228		395	273.059	44.565		395	75.357	216.512		395	69.151
396	90.872	34.098		396	53.193	281.675		396	92.645	428.971		396	114.366	507.705		396	115.252	54.723		396	145.395	60.055		396	167.116	103.634		396	70.038	239.937		396	290.79	612.146		396	116.582	225.722		396	273.059	44.146		396	75.357	196.276		396	69.151
397	90.872	35.049		397	53.193	283.225		397	92.645	426.622		397	114.366	499.07		397	115.252	54.438		397	145.395	58.564		397	167.116	103.469		397	70.038	237.07		397	290.79	615.587		397	116.582	218.023		397	273.059	44.558		397	75.357	206.682		397	69.151
398	90.872	34.483		398	53.193	291.325		398	92.645	427.545		398	114.366	518.787		398	115.252	59.069		398	145.395	57.637		398	167.116	103.069		398	70.038	230.468		398	290.79	607.945		398	116.582	223.255		398	273.059	44.661		398	75.357	207.906		398	69.151
399	90.872	37.322		399	53.193	290.233		399	92.645	429.713		399	114.366	508.775		399	115.252	55.919		399	145.395	58.564		399	167.116	105.308		399	70.038	235.525		399	290.79	625.512		399	116.582	228.236		399	273.059	44.133		399	75.357	201.759		399	69.151
400	90.872	34.429		400	53.193	285.933		400	92.645	426.431		400	114.366	508.174		400	115.252	57.731		400	145.395	57.183		400	167.116	101.523		400	70.038	226.873		400	290.79	620.925		400	116.582	223.863		400	273.059	44.922		400	75.357	207.047		400	69.151
401	90.872	37.273		401	53.193	282.992		401	92.645	422.541		401	114.366	496.45		401	115.252	57.412		401	145.395	57.518		401	167.116	105.361		401	70.038	234.57		401	290.79	610.779		401	116.582	221.825		401	273.059	44.323		401	75.357	195.724		401	69.151
402	90.872	35.746		402	53.193	299.375		402	92.645	431.789		402	114.366	506.539		402	115.252	55.831		402	145.395	55.817		402	167.116	100.862		402	70.038	233.152		402	290.79	612.375		402	116.582	222.213		402	273.059	45.135		402	75.357	202.224		402	69.151
403	90.872	35.112		403	53.193	296.017		403	92.645	431.545		403	114.366	492.589		403	115.252	55.581		403	145.395	55.03		403	167.116	102.401		403	70.038	227.785		403	290.79	616.238		403	116.582	219.122		403	273.059	43.224		403	75.357	200.776		403	69.151
404	90.872	34.707		404	53.193	277.825		404	92.645	428.904		404	114.366	503.36		404	115.252	57.727		404	145.395	58.988		404	167.116	98.443		404	70.038	241.601		404	290.79	613.797		404	116.582	220.312		404	273.059	44.969		404	75.357	206.759		404	69.151
405	90.872	34.112		405	53.193	296.767		405	92.645	435.234		405	114.366	491.922		405	115.252	56.696		405	145.395	56.345		405	167.116	104.902		405	70.038	235.203		405	290.79	614.521		405	116.582	221.863		405	273.059	42.287		405	75.357	198.371		405	69.151
406	90.872	34.527		406	53.193	296.3		406	92.645	442.014		406	114.366	509.054		406	115.252	56.508		406	145.395	57.808		406	167.116	99.469		406	70.038	232.367		406	290.79	610.791		406	116.582	221.814		406	273.059	45.078		406	75.357	210.741		406	69.151
407	90.872	35.307		407	53.193	285.55		407	92.645	448.947		407	114.366	500.764		407	115.252	56.531		407	145.395	60.936		407	167.116	98.907		407	70.038	241.69		407	290.79	608.959		407	116.582	218.369		407	273.059	42.503		407	75.357	201.588		407	69.151
408	90.872	35.712		408	53.193	293.408		408	92.645	448.837		408	114.366	496.283		408	115.252	55.15		408	145.395	57.372		408	167.116	99.801		408	70.038	240.981		408	290.79	618.506		408	116.582	214.555		408	273.059	43.375		408	75.357	203.3		408	69.151
409	90.872	36.702		409	53.193	291		409	92.645	434.766		409	114.366	491.601		409	115.252	52.992		409	145.395	57.878		409	167.116	98.817		409	70.038	236.899		409	290.79	619.264		409	116.582	220.943		409	273.059	44.588		409	75.357	203.812		409	69.151
410	90.872	36.161		410	53.193	294.708		410	92.645	446.77		410	114.366	498.302		410	115.252	57.969		410	145.395	58.198		410	167.116	96.862		410	70.038	236.241		410	290.79	615.729		410	116.582	224.137		410	273.059	43.239		410	75.357	200.076		410	69.151
411	90.872	36.161		411	53.193	286.925		411	92.645	430.019		411	114.366	493.833		411	115.252	57.635		411	145.395	57.93		411	167.116	100.557		411	70.038	232.633		411	290.79	612.916		411	116.582	221.414		411	273.059	43.82		411	75.357	209.641		411	69.151
412	90.872	35.863		412	53.193	281.35		412	92.645	438.593		412	114.366	501.004		412	115.252	57.715		412	145.395	56.149		412	167.116	102.021		412	70.038	237.304		412	290.79	623.941		412	116.582	221.821		412	273.059	44.07		412	75.357	210.294		412	69.151
413	90.872	36.254		413	53.193	287.975		413	92.645	436.785		413	114.366	488.116		413	115.252	56.135		413	145.395	60.345		413	167.116	96.318		413	70.038	235.146		413	290.79	627.273		413	116.582	217.688		413	273.059	45.727		413	75.357	206.365		413	69.151
414	90.872	34.424		414	53.193	299.433		414	92.645	433.751		414	114.366	491.833		414	115.252	55.615		414	145.395	58.058		414	167.116	99.843		414	70.038	230.589		414	290.79	623.788		414	116.582	219.783		414	273.059	44.247		414	75.357	202.388		414	69.151
415	90.872	35.102		415	53.193	285.125		415	92.645	443.11		415	114.366	492.221		415	115.252	55.223		415	145.395	59.555		415	167.116	98.233		415	70.038	233.013		415	290.79	618.412		415	116.582	217.403		415	273.059	44.073		415	75.357	201.459		415	69.151
416	90.872	35.688		416	53.193	303.183		416	92.645	436.014		416	114.366	501.833		416	115.252	55.45		416	145.395	55.796		416	167.116	96.703		416	70.038	235.418		416	290.79	608.823		416	116.582	220.205		416	273.059	43.114		416	75.357	212.647		416	69.151
417	90.872	34.956		417	53.193	292.633		417	92.645	439.464		417	114.366	506.391		417	115.252	58.827		417	145.395	57.872		417	167.116	100.987		417	70.038	235.171		417	290.79	610.213		417	116.582	217.418		417	273.059	44.341		417	75.357	211.818		417	69.151
418	90.872	34.254		418	53.193	308.558		418	92.645	444.89		418	114.366	505.725		418	115.252	56.858		418	145.395	54.82		418	167.116	101.981		418	70.038	226.823		418	290.79	621.514		418	116.582	215.388		418	273.059	45.148		418	75.357	202.859		418	69.151
419	90.872	34.507		419	53.193	292.808		419	92.645	438.785		419	114.366	499.698		419	115.252	55.604		419	145.395	56.53		419	167.116	100.65		419	70.038	229.582		419	290.79	612.843		419	116.582	220.548		419	273.059	43.601		419	75.357	203.018		419	69.151
420	90.872	35.478		420	53.193	299.183		420	92.645	434.091		420	114.366	507.248		420	115.252	57.142		420	145.395	56.933		420	167.116	98.467		420	70.038	231.677		420	290.79	615.735		420	116.582	215.506		420	273.059	43.662		420	75.357	202.441		420	69.151
421	90.872	33.229		421	53.193	296.458		421	92.645	447.574		421	114.366	501.531		421	115.252	57.292		421	145.395	56.409		421	167.116	97.91		421	70.038	239.968		421	290.79	613.277		421	116.582	215.643		421	273.059	45.146		421	75.357	201.376		421	69.151
422	90.872	34.62		422	53.193	288.225		422	92.645	421.522		422	114.366	501.88		422	115.252	55.873		422	145.395	60.546		422	167.116	101.098		422	70.038	233.399		422	290.79	612.79		422	116.582	212.764		422	273.059	46.771		422	75.357	205.882		422	69.151
423	90.872	33.561		423	53.193	296.658		423	92.645	440.737		423	114.366	492.314		423	115.252	55.431		423	145.395	57.509		423	167.116	95.021		423	70.038	231.165		423	290.79	616.816		423	116.582	207.084		423	273.059	43.825		423	75.357	216.035		423	69.151
424	90.872	33.751		424	53.193	303.033		424	92.645	436.56		424	114.366	495.205		424	115.252	55.485		424	145.395	56.659		424	167.116	101.944		424	70.038	238.424		424	290.79	616.744		424	116.582	219.346		424	273.059	43.133		424	75.357	206.447		424	69.151
425	90.872	34.927		425	53.193	304.967		425	92.645	435.244		425	114.366	490.713		425	115.252	53.462		425	145.395	55.808		425	167.116	100.74		425	70.038	229.437		425	290.79	599.337		425	116.582	222.289		425	273.059	44.765		425	75.357	214.571		425	69.151
426	90.872	35.151		426	53.193	287.625		426	92.645	432.536		426	114.366	506.891		426	115.252	51.842		426	145.395	56.954		426	167.116	98.69		426	70.038	219.158		426	290.79	609.268		426	116.582	213.084		426	273.059	44.922		426	75.357	210.859		426	69.151
427	90.872	35.356		427	53.193	293.15		427	92.645	436.507		427	114.366	489.221		427	115.252	54.931		427	145.395	53.848		427	167.116	100.87		427	70.038	230.506		427	290.79	602.509		427	116.582	223.913		427	273.059	44.005		427	75.357	204.388		427	69.151
428	90.872	34.132		428	53.193	303.458		428	92.645	430.301		428	114.366	501.686		428	115.252	52.008		428	145.395	58.939		428	167.116	99.08		428	70.038	222.443		428	290.79	606.564		428	116.582	214.43		428	273.059	43.432		428	75.357	200.447		428	69.151
429	90.872	38		429	53.193	303.233		429	92.645	443.689		429	114.366	496.562		429	115.252	55.004		429	145.395	54.591		429	167.116	101.531		429	70.038	232.956		429	290.79	601.206		429	116.582	207.232		429	273.059	47.396		429	75.357	208.047		429	69.151
430	90.872	34.332		430	53.193	291.392		430	92.645	431.89		430	114.366	503.981		430	115.252	55.673		430	145.395	57.905		430	167.116	99.09		430	70.038	230.329		430	290.79	606.593		430	116.582	210.901		430	273.059	46.213		430	75.357	201.688		430	69.151
431	90.872	35.941		431	53.193	281.733		431	92.645	427.78		431	114.366	505.019		431	115.252	55.138		431	145.395	60.03		431	167.116	97.788		431	70.038	221.949		431	290.79	602.415		431	116.582	216.399		431	273.059	46.386		431	75.357	205.724		431	69.151
432	90.872	35.415		432	53.193	300.125		432	92.645	418.043		432	114.366	498.965		432	115.252	54.262		432	145.395	58.384		432	167.116	98.326		432	70.038	222.627		432	290.79	603.108		432	116.582	208.475		432	273.059	44.117		432	75.357	213.141		432	69.151
433	90.872	36.663		433	53.193	295.3		433	92.645	423.392		433	114.366	506.271		433	115.252	53.512		433	145.395	57.415		433	167.116	99.411		433	70.038	226.759		433	290.79	610.684		433	116.582	213.738		433	273.059	44.653		433	75.357	205.224		433	69.151
434	90.872	35.239		434	53.193	297.783		434	92.645	421.321		434	114.366	511.43		434	115.252	53.427		434	145.395	58.101		434	167.116	101.143		434	70.038	225.329		434	290.79	617.419		434	116.582	209.274		434	273.059	46.245		434	75.357	205.694		434	69.151
435	90.872	35.224		435	53.193	296.592		435	92.645	417.943		435	114.366	488.589		435	115.252	55.723		435	145.395	59.39		435	167.116	97.987		435	70.038	227.614		435	290.79	604.224		435	116.582	216.711		435	273.059	45.662		435	75.357	205.8		435	69.151
436	90.872	33.634		436	53.193	288.842		436	92.645	423.148		436	114.366	498.256		436	115.252	54.523		436	145.395	58.314		436	167.116	99.316		436	70.038	236.19		436	290.79	609.194		436	116.582	210.734		436	273.059	45.56		436	75.357	197.394		436	69.151
437	90.872	32.122		437	53.193	301.992		437	92.645	416.608		437	114.366	494.171		437	115.252	56.2		437	145.395	56.479		437	167.116	102.321		437	70.038	216.987		437	290.79	603.945		437	116.582	220.529		437	273.059	45.313		437	75.357	204.124		437	69.151
438	90.872	35.849		438	53.193	291.6		438	92.645	421.282		438	114.366	497.818		438	115.252	60.127		438	145.395	58.939		438	167.116	103.554		438	70.038	219.247		438	290.79	610.37		438	116.582	211.221		438	273.059	44.802		438	75.357	193.718		438	69.151
439	90.872	34.537		439	53.193	299.267		439	92.645	416.603		439	114.366	507.826		439	115.252	58.062		439	145.395	57.704		439	167.116	100.273		439	70.038	222.411		439	290.79	606.023		439	116.582	216.133		439	273.059	45.169		439	75.357	204.788		439	69.151
440	90.872	34.805		440	53.193	293.275		440	92.645	429		440	114.366	509.143		440	115.252	55.869		440	145.395	55.613		440	167.116	99.692		440	70.038	218.563		440	290.79	601.061		440	116.582	208.73		440	273.059	46.325		440	75.357	202.653		440	69.151
441	90.872	36.424		441	53.193	298.892		441	92.645	436		441	114.366	494.779		441	115.252	55.635		441	145.395	56.689		441	167.116	96.393		441	70.038	223.437		441	290.79	603.503		441	116.582	214.095		441	273.059	45.414		441	75.357	200.059		441	69.151
442	90.872	34.673		442	53.193	295.025		442	92.645	417.708		442	114.366	490.326		442	115.252	54.242		442	145.395	58.436		442	167.116	97.042		442	70.038	213.171		442	290.79	601.727		442	116.582	212.506		442	273.059	45.407		442	75.357	202.988		442	69.151
443	90.872	34		443	53.193	305.5		443	92.645	431.167		443	114.366	503.891		443	115.252	57.231		443	145.395	56.704		443	167.116	99.337		443	70.038	212.968		443	290.79	602.274		443	116.582	207.209		443	273.059	46.709		443	75.357	203.971		443	69.151
444	90.872	33.6		444	53.193	299.608		444	92.645	414.871		444	114.366	487.981		444	115.252	54.954		444	145.395	58.723		444	167.116	96.334		444	70.038	225.665		444	290.79	598.412		444	116.582	221.916		444	273.059	44.424		444	75.357	206.947		444	69.151
445	90.872	34.58		445	53.193	298.833		445	92.645	423.368		445	114.366	490.027		445	115.252	53.896		445	145.395	53.591		445	167.116	96.905		445	70.038	221.43		445	290.79	602.003		445	116.582	208.414		445	273.059	45.084		445	75.357	198.188		445	69.151
446	90.872	36.132		446	53.193	287.892		446	92.645	420.301		446	114.366	504.605		446	115.252	56.865		446	145.395	58.149		446	167.116	97.878		446	70.038	222.297		446	290.79	595.857		446	116.582	208.848		446	273.059	45.414		446	75.357	203.2		446	69.151
447	90.872	34.498		447	53.193	296.233		447	92.645	412.627		447	114.366	501.372		447	115.252	54.012		447	145.395	55.71		447	167.116	96.65		447	70.038	227.987		447	290.79	599.613		447	116.582	212.433		447	273.059	44.737		447	75.357	204.288		447	69.151
448	90.872	35.473		448	53.193	300.158		448	92.645	422.45		448	114.366	496.182		448	115.252	54.315		448	145.395	57.155		448	167.116	96.255		448	70.038	226.854		448	290.79	604.896		448	116.582	205.437		448	273.059	41.951		448	75.357	197.712		448	69.151
449	90.872	33.4		449	53.193	299.125		449	92.645	408.378		449	114.366	503.694		449	115.252	55.954		449	145.395	54.421		449	167.116	100.501		449	70.038	219		449	290.79	593.226		449	116.582	211.646		449	273.059	44.39		449	75.357	205.641		449	69.151
450	90.872	35.639		450	53.193	302.025		450	92.645	421.502		450	114.366	507.147		450	115.252	56.035		450	145.395	55.095		450	167.116	99.751		450	70.038	228.304		450	290.79	595.084		450	116.582	212.605		450	273.059	45.162		450	75.357	200		450	69.151
451	90.872	31.771		451	53.193	310.25		451	92.645	416.081		451	114.366	492.213		451	115.252	56.696		451	145.395	56.93		451	167.116	97.674		451	70.038	215.589		451	290.79	597.111		451	116.582	206.24		451	273.059	45.903		451	75.357	198.812		451	69.151
452	90.872	34.483		452	53.193	297.308		452	92.645	415.866		452	114.366	511.628		452	115.252	59.242		452	145.395	57.101		452	167.116	101.18		452	70.038	222.608		452	290.79	587.061		452	116.582	210.536		452	273.059	46.179		452	75.357	206.3		452	69.151
453	90.872	35.459		453	53.193	290.608		453	92.645	419.388		453	114.366	511.388		453	115.252	56.623		453	145.395	59.037		453	167.116	93.939		453	70.038	222.532		453	290.79	591.782		453	116.582	212.643		453	273.059	46.151		453	75.357	209.888		453	69.151
454	90.872	34.766		454	53.193	306.792		454	92.645	407.498		454	114.366	509.353		454	115.252	55.373		454	145.395	56.384		454	167.116	96.462		454	70.038	215.316		454	290.79	586.476		454	116.582	203.091		454	273.059	44.742		454	75.357	207.029		454	69.151
455	90.872	35.268		455	53.193	301.483		455	92.645	405.211		455	114.366	509.295		455	115.252	56.038		455	145.395	57.61		455	167.116	99.159		455	70.038	218.437		455	290.79	579.971		455	116.582	210.19		455	273.059	45.089		455	75.357	202.6		455	69.151
456	90.872	33.102		456	53.193	291.167		456	92.645	421.612		456	114.366	499.388		456	115.252	58.096		456	145.395	54.738		456	167.116	98.554		456	70.038	221.19		456	290.79	591.221		456	116.582	208.46		456	273.059	44.472		456	75.357	201.776		456	69.151
457	90.872	37.278		457	53.193	298.567		457	92.645	413.478		457	114.366	503.655		457	115.252	59.415		457	145.395	55.18		457	167.116	98.926		457	70.038	233.044		457	290.79	583.316		457	116.582	206.787		457	273.059	44.33		457	75.357	198.306		457	69.151
458	90.872	34.341		458	53.193	295.992		458	92.645	406.833		458	114.366	503.252		458	115.252	58.769		458	145.395	58.393		458	167.116	95.91		458	70.038	223.848		458	290.79	604.186		458	116.582	207.734		458	273.059	45.82		458	75.357	199.694		458	69.151
459	90.872	35.502		459	53.193	294.383		459	92.645	403.718		459	114.366	496.074		459	115.252	58.496		459	145.395	53.75		459	167.116	101.382		459	70.038	220.006		459	290.79	602.934		459	116.582	206.658		459	273.059	44.912		459	75.357	200.929		459	69.151
460	90.872	35.449		460	53.193	294.392		460	92.645	415.789		460	114.366	502.376		460	115.252	55.804		460	145.395	53.348		460	167.116	98.501		460	70.038	216.399		460	290.79	596.569		460	116.582	206.658		460	273.059	45.161		460	75.357	197.712		460	69.151
461	90.872	34.79		461	53.193	299.058		461	92.645	412.483		461	114.366	506.388		461	115.252	57.073		461	145.395	54.213		461	167.116	97.491		461	70.038	228.835		461	290.79	600.706		461	116.582	210.81		461	273.059	47.057		461	75.357	196.494		461	69.151
462	90.872	33.371		462	53.193	297.525		462	92.645	410.062		462	114.366	507.961		462	115.252	54.827		462	145.395	57.046		462	167.116	97.416		462	70.038	224.886		462	290.79	602.142		462	116.582	213.144		462	273.059	44.136		462	75.357	199.188		462	69.151
463	90.872	34.859		463	53.193	297.008		463	92.645	418.737		463	114.366	507.775		463	115.252	56.269		463	145.395	57.445		463	167.116	98.767		463	70.038	227.133		463	290.79	596.024		463	116.582	213.205		463	273.059	44.604		463	75.357	203.176		463	69.151
464	90.872	37.054		464	53.193	299.892		464	92.645	416.866		464	114.366	522.171		464	115.252	57.454		464	145.395	54.265		464	167.116	98.729		464	70.038	231.051		464	290.79	605.416		464	116.582	203.399		464	273.059	46.031		464	75.357	193.271		464	69.151
465	90.872	34.722		465	53.193	295.075		465	92.645	415.675		465	114.366	501.372		465	115.252	55.719		465	145.395	57.043		465	167.116	96.944		465	70.038	233.082		465	290.79	590.531		465	116.582	204.616		465	273.059	45.539		465	75.357	207.424		465	69.151
466	90.872	36.829		466	53.193	305.492		466	92.645	406.837		466	114.366	513.55		466	115.252	55.323		466	145.395	56.646		466	167.116	97.294		466	70.038	228.234		466	290.79	596.788		466	116.582	201.981		466	273.059	45.968		466	75.357	205.647		466	69.151
467	90.872	33.132		467	53.193	303.592		467	92.645	411.215		467	114.366	513.977		467	115.252	60.004		467	145.395	56.119		467	167.116	96.926		467	70.038	226.728		467	290.79	586.877		467	116.582	207.597		467	273.059	46.526		467	75.357	188.435		467	69.151
468	90.872	35.278		468	53.193	301.958		468	92.645	411.646		468	114.366	517.814		468	115.252	52.842		468	145.395	58.332		468	167.116	98.753		468	70.038	231.709		468	290.79	577.031		468	116.582	198.445		468	273.059	45.433		468	75.357	202.035		468	69.151
469	90.872	36.107		469	53.193	303.775		469	92.645	402.411		469	114.366	508.26		469	115.252	54.935		469	145.395	55.707		469	167.116	101.377		469	70.038	236.152		469	290.79	587.026		469	116.582	202.255		469	273.059	45.607		469	75.357	207.424		469	69.151
470	90.872	36.595		470	53.193	284.458		470	92.645	412.105		470	114.366	520.116		470	115.252	54.631		470	145.395	55.713		470	167.116	102.403		470	70.038	226.671		470	290.79	580.098		470	116.582	205.875		470	273.059	45.596		470	75.357	201.941		470	69.151
471	90.872	35.22		471	53.193	299.3		471	92.645	395.33		471	114.366	520.395		471	115.252	54.35		471	145.395	54.988		471	167.116	99.157		471	70.038	223.854		471	290.79	574.628		471	116.582	199.308		471	273.059	44.729		471	75.357	207.424		471	69.151
472	90.872	33.834		472	53.193	295.45		472	92.645	392.789		472	114.366	518.465		472	115.252	49.765		472	145.395	55.869		472	167.116	100.989		472	70.038	227.93		472	290.79	568.544		472	116.582	210.053		472	273.059	46.597		472	75.357	202.253		472	69.151
473	90.872	35.849		473	53.193	291.517		473	92.645	404.895		473	114.366	509.632		473	115.252	60.75		473	145.395	53.39		473	167.116	96.042		473	70.038	233.759		473	290.79	561.16		473	116.582	203.316		473	273.059	45.276		473	75.357	211.671		473	69.151
474	90.872	35.322		474	53.193	311.567		474	92.645	407.861		474	114.366	526.453		474	115.252	54.865		474	145.395	54.409		474	167.116	97.902		474	70.038	240.62		474	290.79	562.477		474	116.582	210.992		474	273.059	46.153		474	75.357	202.153		474	69.151
475	90.872	34.195		475	53.193	305.425		475	92.645	411.555		475	114.366	520		475	115.252	55.265		475	145.395	58.933		475	167.116	99.109		475	70.038	235.051		475	290.79	550.308		475	116.582	206.327		475	273.059	47.028		475	75.357	193.606		475	69.151
476	90.872	34.249		476	53.193	300.067		476	92.645	409.129		476	114.366	524.496		476	115.252	53.781		476	145.395	54.595		476	167.116	97.146		476	70.038	215.734		476	290.79	557.238		476	116.582	200.084		476	273.059	45.068		476	75.357	201.418		476	69.151
477	90.872	33.156		477	53.193	302.7		477	92.645	400.234		477	114.366	509.938		477	115.252	56.269		477	145.395	53.268		477	167.116	95.011		477	70.038	216.924		477	290.79	570.07		477	116.582	203.122		477	273.059	43.998		477	75.357	194.294		477	69.151
478	90.872	33.556		478	53.193	293.192		478	92.645	409.708		478	114.366	505.558		478	115.252	54.646		478	145.395	53.744		478	167.116	94.793		478	70.038	231.69		478	290.79	574.608		478	116.582	203.183		478	273.059	44.943		478	75.357	199.912		478	69.151
479	90.872	34.732		479	53.193	306.342		479	92.645	398.78		479	114.366	516.074		479	115.252	56.127		479	145.395	53.796		479	167.116	95.257		479	70.038	233.013		479	290.79	585.678		479	116.582	203.144		479	273.059	44.523		479	75.357	196.818		479	69.151
480	90.872	36.302		480	53.193	288.292		480	92.645	400.096		480	114.366	514.814		480	115.252	52.938		480	145.395	55.116		480	167.116	94.7		480	70.038	233.677		480	290.79	584.88		480	116.582	204.057		480	273.059	45.128		480	75.357	203.553		480	69.151
481	90.872	36.776		481	53.193	303.358		481	92.645	406.852		481	114.366	516.469		481	115.252	54.919		481	145.395	53.384		481	167.116	93.796		481	70.038	225.297		481	290.79	579.631		481	116.582	201.559		481	273.059	44.506		481	75.357	200.206		481	69.151
482	90.872	36.473		482	53.193	305.392		482	92.645	404.407		482	114.366	513.632		482	115.252	56.35		482	145.395	54.101		482	167.116	96.878		482	70.038	231.247		482	290.79	578.881		482	116.582	203.475		482	273.059	45.519		482	75.357	195.618		482	69.151
483	90.872	35.678		483	53.193	305.692		483	92.645	392.612		483	114.366	518.744		483	115.252	52.931		483	145.395	54.311		483	167.116	97.721		483	70.038	231.424		483	290.79	580.776		483	116.582	202.935		483	273.059	44.221		483	75.357	203.576		483	69.151
484	90.872	34.488		484	53.193	298.792		484	92.645	396.024		484	114.366	511.934		484	115.252	57.623		484	145.395	54.857		484	167.116	98.289		484	70.038	230.203		484	290.79	577.441		484	116.582	195.194		484	273.059	43.792		484	75.357	193.406		484	69.151
485	90.872	33.38		485	53.193	287.367		485	92.645	387.88		485	114.366	512.62		485	115.252	55.385		485	145.395	52.549		485	167.116	103.042		485	70.038	223.19		485	290.79	583.274		485	116.582	203.3		485	273.059	45.562		485	75.357	198.553		485	69.151
486	90.872	35.512		486	53.193	289.15		486	92.645	387.976		486	114.366	507.973		486	115.252	58.592		486	145.395	53.183		486	167.116	97.239		486	70.038	225.835		486	290.79	584.841		486	116.582	205.232		486	273.059	43.583		486	75.357	196.488		486	69.151
487	90.872	33.756		487	53.193	291.475		487	92.645	396.708		487	114.366	514.085		487	115.252	53.388		487	145.395	51.924		487	167.116	99.074		487	70.038	227.462		487	290.79	590.172		487	116.582	195.882		487	273.059	43.287		487	75.357	188.924		487	69.151
488	90.872	35.268		488	53.193	304.658		488	92.645	394.368		488	114.366	514.469		488	115.252	55.969		488	145.395	56.902		488	167.116	98.997		488	70.038	232.475		488	290.79	582.503		488	116.582	199.456		488	273.059	45.304		488	75.357	208.394		488	69.151
489	90.872	34.576		489	53.193	302.542		489	92.645	409.225		489	114.366	510.682		489	115.252	54.3		489	145.395	53.357		489	167.116	100.687		489	70.038	227.304		489	290.79	582.34		489	116.582	197.848		489	273.059	45.615		489	75.357	202.929		489	69.151
490	90.872	35.22		490	53.193	311.2		490	92.645	400.301		490	114.366	511.438		490	115.252	55.377		490	145.395	55.052		490	167.116	99.724		490	70.038	230.614		490	290.79	579.744		490	116.582	204.658		490	273.059	45.32		490	75.357	196.665		490	69.151
491	90.872	36.39		491	53.193	297.1		491	92.645	402.632		491	114.366	517.581		491	115.252	57.662		491	145.395	52.747		491	167.116	99.419		491	70.038	226.196		491	290.79	580.774		491	116.582	202.707		491	273.059	43.838		491	75.357	183.424		491	69.151
492	90.872	36.283		492	53.193	297.475		492	92.645	395.096		492	114.366	510.302		492	115.252	55.654		492	145.395	52.915		492	167.116	94.891		492	70.038	223.247		492	290.79	578.377		492	116.582	207.814		492	273.059	43.677		492	75.357	194.594		492	69.151
493	90.872	36.024		493	53.193	311.917		493	92.645	406.823		493	114.366	500.891		493	115.252	53.962		493	145.395	55.159		493	167.116	96.825		493	70.038	224.411		493	290.79	568.059		493	116.582	207.304		493	273.059	45.881		493	75.357	198.071		493	69.151
494	90.872	33.59		494	53.193	296.917		494	92.645	395.775		494	114.366	508.004		494	115.252	58.115		494	145.395	55.168		494	167.116	95.907		494	70.038	226.785		494	290.79	571.881		494	116.582	197.597		494	273.059	43.953		494	75.357	195.482		494	69.151
495	90.872	35.268		495	53.193	305.467		495	92.645	401.99		495	114.366	506.043		495	115.252	57.104		495	145.395	55.78		495	167.116	97.642		495	70.038	215.063		495	290.79	566.366		495	116.582	201.768		495	273.059	44.084		495	75.357	201.247		495	69.151
496	90.872	34.693		496	53.193	291.8		496	92.645	387.244		496	114.366	510.128		496	115.252	57.5		496	145.395	54.582		496	167.116	97.273		496	70.038	221.449		496	290.79	577.712		496	116.582	207.156		496	273.059	44.005		496	75.357	199.9		496	69.151
497	90.872	34.473		497	53.193	315.05		497	92.645	389.976		497	114.366	508.295		497	115.252	57.038		497	145.395	54.582		497	167.116	94.66		497	70.038	217.778		497	290.79	578.003		497	116.582	204.24		497	273.059	44.011		497	75.357	197.447		497	69.151
498	90.872	34.356		498	53.193	313.933		498	92.645	389.278		498	114.366	499.566		498	115.252	56.862		498	145.395	53.494		498	167.116	96.05		498	70.038	222.063		498	290.79	573.843		498	116.582	204.422		498	273.059	44.209		498	75.357	201.982		498	69.151
499	90.872	37.493		499	53.193	317.225		499	92.645	397.45		499	114.366	501.806		499	115.252	52.938		499	145.395	54.162		499	167.116	99.427		499	70.038	226.968		499	290.79	580.447		499	116.582	205.764		499	273.059	45.049		499	75.357	193.347		499	69.151
500	90.872	34.473		500	53.193	298.7		500	92.645	398.124		500	114.366	503.942		500	115.252	58.277		500	145.395	55.387		500	167.116	97.422		500	70.038	227.873		500	290.79	577.703		500	116.582	204.03		500	273.059	43.929		500	75.357	203.859		500	69.151
501	90.872	35.327		501	53.193	303.825		501	92.645	395.761		501	114.366	496.938		501	115.252	55.058		501	145.395	52.54		501	167.116	96.188		501	70.038	227.582		501	290.79	572.721		501	116.582	204.289		501	273.059	44.497		501	75.357	202.041		501	69.151
502	90.872	33.785		502	53.193	311.9		502	92.645	399.493		502	114.366	495.023		502	115.252	56.196		502	145.395	55.25		502	167.116	95.268		502	70.038	217.082		502	290.79	573.219		502	116.582	203.992		502	273.059	43.008		502	75.357	195.424		502	69.151
503	90.872	33.098		503	53.193	303.058		503	92.645	398.823		503	114.366	511.837		503	115.252	54.477		503	145.395	55.006		503	167.116	98.257		503	70.038	231.722		503	290.79	576.003		503	116.582	207.916		503	273.059	42.748		503	75.357	184.771		503	69.151
504	90.872	35.024		504	53.193	308.875		504	92.645	394.455		504	114.366	509.961		504	115.252	53.573		504	145.395	55.662		504	167.116	99.127		504	70.038	228.272		504	290.79	576.168		504	116.582	205.456		504	273.059	43.502		504	75.357	201.076		504	69.151
505	90.872	33.839		505	53.193	315.092		505	92.645	388.411		505	114.366	504.256		505	115.252	54.415		505	145.395	55.497		505	167.116	97.358		505	70.038	228.297		505	290.79	580.191		505	116.582	201.312		505	273.059	43.838		505	75.357	202.806		505	69.151
506	90.872	34.088		506	53.193	300.267		506	92.645	396.703		506	114.366	494.992		506	115.252	54.527		506	145.395	56.311		506	167.116	94.345		506	70.038	227.12		506	290.79	589.372		506	116.582	207.091		506	273.059	41.458		506	75.357	196.812		506	69.151
507	90.872	34.21		507	53.193	307.867		507	92.645	387.828		507	114.366	500.093		507	115.252	53.45		507	145.395	53.277		507	167.116	95.966		507	70.038	220.5		507	290.79	574.473		507	116.582	212.342		507	273.059	42.985		507	75.357	197.553		507	69.151
508	90.872	34.888		508	53.193	318.117		508	92.645	393.957		508	114.366	491.415		508	115.252	51.381		508	145.395	55.509		508	167.116	96.464		508	70.038	218.386		508	290.79	577.448		508	116.582	209.106		508	273.059	43.953		508	75.357	195.353		508	69.151
509	90.872	35.937		509	53.193	313.658		509	92.645	389.799		509	114.366	490.306		509	115.252	53.904		509	145.395	55.637		509	167.116	97.095		509	70.038	228.69		509	290.79	569.026		509	116.582	209.156		509	273.059	45.534		509	75.357	191.259		509	69.151
510	90.872	37.122		510	53.193	304.992		510	92.645	393.895		510	114.366	495.934		510	115.252	53.904		510	145.395	52.893		510	167.116	98.873		510	70.038	222.044		510	290.79	579.639		510	116.582	201.293		510	273.059	45.771		510	75.357	189.3		510	69.151
511	90.872	36.541		511	53.193	307.5		511	92.645	380.952		511	114.366	490.884		511	115.252	54.046		511	145.395	54.707		511	167.116	97.801		511	70.038	229.449		511	290.79	570.567		511	116.582	212.939		511	273.059	45.362		511	75.357	195.029		511	69.151
512	90.872	35.927		512	53.193	315.825		512	92.645	388.306		512	114.366	491.504		512	115.252	53.846		512	145.395	55.607		512	167.116	97.623		512	70.038	229.551		512	290.79	572.892		512	116.582	204.209		512	273.059	45.497		512	75.357	192.835		512	69.151
513	90.872	35.473		513	53.193	324.883		513	92.645	387.273		513	114.366	498.628		513	115.252	54.331		513	145.395	52.799		513	167.116	94.501		513	70.038	223.354		513	290.79	573.669		513	116.582	214.365		513	273.059	45.724		513	75.357	197.871		513	69.151
514	90.872	33.654		514	53.193	307.958		514	92.645	376.086		514	114.366	492.066		514	115.252	54.127		514	145.395	55.183		514	167.116	97.114		514	70.038	229.089		514	290.79	567.66		514	116.582	204.548		514	273.059	46.503		514	75.357	195.4		514	69.151
515	90.872	36.468		515	53.193	314.208		515	92.645	381.416		515	114.366	485.05		515	115.252	52.696		515	145.395	53.18		515	167.116	91.488		515	70.038	232.937		515	290.79	571.229		515	116.582	201.703		515	273.059	46.675		515	75.357	199.294		515	69.151
516	90.872	33.507		516	53.193	323.375		516	92.645	379.23		516	114.366	487.419		516	115.252	55.7		516	145.395	56.061		516	167.116	96.019		516	70.038	220.101		516	290.79	576.399		516	116.582	208.536		516	273.059	45.844		516	75.357	190.1		516	69.151
517	90.872	34.766		517	53.193	318.642		517	92.645	376.129		517	114.366	486.105		517	115.252	54		517	145.395	50.909		517	167.116	99.408		517	70.038	220.057		517	290.79	574.04		517	116.582	202.825		517	273.059	46.047		517	75.357	187.406		517	69.151
518	90.872	36.966		518	53.193	309.333		518	92.645	375.555		518	114.366	493.264		518	115.252	54.904		518	145.395	53.869		518	167.116	96.196		518	70.038	221.487		518	290.79	583.933		518	116.582	210.734		518	273.059	47.247		518	75.357	192.829		518	69.151
519	90.872	33.332		519	53.193	309.725		519	92.645	376.459		519	114.366	496.771		519	115.252	56.215		519	145.395	55.366		519	167.116	97.334		519	70.038	226.551		519	290.79	586.361		519	116.582	207.935		519	273.059	45.149		519	75.357	194.176		519	69.151
520	90.872	35.249		520	53.193	307.55		520	92.645	372.383		520	114.366	493.659		520	115.252	54.504		520	145.395	54.216		520	167.116	100.194		520	70.038	222.468		520	290.79	573.204		520	116.582	203.266		520	273.059	45.18		520	75.357	199.506		520	69.151
521	90.872	35.459		521	53.193	307.767		521	92.645	387.722		521	114.366	485.089		521	115.252	55.462		521	145.395	52.387		521	167.116	94.326		521	70.038	227.304		521	290.79	579.723		521	116.582	206.947		521	273.059	43.231		521	75.357	189.259		521	69.151
522	90.872	35.024		522	53.193	306.133		522	92.645	374.651		522	114.366	492.721		522	115.252	51.419		522	145.395	52.027		522	167.116	93.355		522	70.038	205.203		522	290.79	570.835		522	116.582	216.837		522	273.059	45.394		522	75.357	198.624		522	69.151
523	90.872	33.985		523	53.193	303.567		523	92.645	388.833		523	114.366	493.663		523	115.252	51.388		523	145.395	54.976		523	167.116	93.899		523	70.038	225.956		523	290.79	569.66		523	116.582	209.65		523	273.059	44.989		523	75.357	199.129		523	69.151
524	90.872	34.698		524	53.193	312.367		524	92.645	382.498		524	114.366	499.221		524	115.252	52.65		524	145.395	53.744		524	167.116	95.48		524	70.038	225.816		524	290.79	574.573		524	116.582	206.643		524	273.059	45.789		524	75.357	192.165		524	69.151
525	90.872	35.532		525	53.193	322.633		525	92.645	381.632		525	114.366	502.252		525	115.252	54.692		525	145.395	51.826		525	167.116	97.366		525	70.038	212.576		525	290.79	567.259		525	116.582	206.331		525	273.059	46.961		525	75.357	190.535		525	69.151
526	90.872	36.19		526	53.193	308.4		526	92.645	385.282		526	114.366	497.868		526	115.252	54.965		526	145.395	51.854		526	167.116	97.714		526	70.038	217.962		526	290.79	572.96		526	116.582	210.498		526	273.059	47.213		526	75.357	200.376		526	69.151
527	90.872	35.341		527	53.193	293.3		527	92.645	377.584		527	114.366	503.438		527	115.252	51.854		527	145.395	53.436		527	167.116	92.963		527	70.038	215.741		527	290.79	572.123		527	116.582	208.095		527	273.059	47.701		527	75.357	199.1		527	69.151
528	90.872	35.556		528	53.193	311.95		528	92.645	372.325		528	114.366	501.973		528	115.252	49.835		528	145.395	54.521		528	167.116	99.711		528	70.038	219.734		528	290.79	579.476		528	116.582	200.574		528	273.059	46.438		528	75.357	198.818		528	69.151
529	90.872	36.024		529	53.193	318.817		529	92.645	373.986		529	114.366	496.554		529	115.252	50.512		529	145.395	50.512		529	167.116	96.594		529	70.038	224.848		529	290.79	571.883		529	116.582	202.433		529	273.059	45.331		529	75.357	195.759		529	69.151
530	90.872	34.761		530	53.193	308.208		530	92.645	373.172		530	114.366	504.543		530	115.252	52.035		530	145.395	53.183		530	167.116	93.353		530	70.038	225.81		530	290.79	566.634		530	116.582	214.757		530	273.059	45.763		530	75.357	189.112		530	69.151
531	90.872	33.727		531	53.193	298.425		531	92.645	372.526		531	114.366	489.477		531	115.252	50.373		531	145.395	52.729		531	167.116	98.072		531	70.038	227.108		531	290.79	565.977		531	116.582	199.27		531	273.059	45.883		531	75.357	194.124		531	69.151
532	90.872	36.254		532	53.193	322.367		532	92.645	373.206		532	114.366	506.612		532	115.252	52.604		532	145.395	52.588		532	167.116	99.851		532	70.038	224.133		532	290.79	584.041		532	116.582	208.643		532	273.059	44.242		532	75.357	196.053		532	69.151
533	90.872	35.063		533	53.193	316.533		533	92.645	378.813		533	114.366	502.81		533	115.252	51.788		533	145.395	53.966		533	167.116	101.257		533	70.038	217.544		533	290.79	579.916		533	116.582	212.506		533	273.059	44.484		533	75.357	194.224		533	69.151
534	90.872	33.176		534	53.193	313.925		534	92.645	369.938		534	114.366	489.566		534	115.252	52.723		534	145.395	54.662		534	167.116	100.347		534	70.038	228.12		534	290.79	574.386		534	116.582	211.133		534	273.059	46.13		534	75.357	200.641		534	69.151
535	90.872	36.01		535	53.193	317.167		535	92.645	352.493		535	114.366	493.081		535	115.252	50.077		535	145.395	51.68		535	167.116	97.042		535	70.038	221.924		535	290.79	585.401		535	116.582	215.144		535	273.059	43.351		535	75.357	191.388		535	69.151
536	90.872	33.585		536	53.193	311.833		536	92.645	370.689		536	114.366	502.543		536	115.252	50.5		536	145.395	52.72		536	167.116	99.581		536	70.038	221.133		536	290.79	574.837		536	116.582	218.513		536	273.059	46.455		536	75.357	199.929		536	69.151
537	90.872	36.488		537	53.193	302.35		537	92.645	374.512		537	114.366	492.023		537	115.252	52.115		537	145.395	54.168		537	167.116	98.828		537	70.038	220.722		537	290.79	581.506		537	116.582	205.665		537	273.059	45.198		537	75.357	193.735		537	69.151
538	90.872	35.41		538	53.193	324.042		538	92.645	364.45		538	114.366	501.426		538	115.252	53.015		538	145.395	50.046		538	167.116	98.806		538	70.038	221.987		538	290.79	580.433		538	116.582	215.825		538	273.059	45.597		538	75.357	193		538	69.151
539	90.872	37.488		539	53.193	323.025		539	92.645	358.876		539	114.366	496.678		539	115.252	55.154		539	145.395	51.308		539	167.116	102.305		539	70.038	222.449		539	290.79	577.938		539	116.582	218.023		539	273.059	46.089		539	75.357	199.4		539	69.151
540	90.872	33.463		540	53.193	314.458		540	92.645	375.072		540	114.366	496.074		540	115.252	53.569		540	145.395	53.454		540	167.116	100.159		540	70.038	221.335		540	290.79	581.678		540	116.582	208.97		540	273.059	45.856		540	75.357	201.147		540	69.151
541	90.872	37.58		541	53.193	315.508		541	92.645	369.196		541	114.366	491.725		541	115.252	50.277		541	145.395	52.384		541	167.116	97.467		541	70.038	220.551		541	290.79	578.454		541	116.582	209.627		541	273.059	45.445		541	75.357	197.706		541	69.151
542	90.872	34.59		542	53.193	309.908		542	92.645	362.445		542	114.366	495.81		542	115.252	53.45		542	145.395	53.753		542	167.116	100.74		542	70.038	230.228		542	290.79	580.718		542	116.582	218.49		542	273.059	46.206		542	75.357	194.635		542	69.151
543	90.872	36.824		543	53.193	317.017		543	92.645	370.938		543	114.366	493.884		543	115.252	50.704		543	145.395	52.857		543	167.116	97.249		543	70.038	219.918		543	290.79	580.293		543	116.582	213.118		543	273.059	44.599		543	75.357	192.735		543	69.151
544	90.872	35.049		544	53.193	321.983		544	92.645	358.823		544	114.366	490.597		544	115.252	52.985		544	145.395	54.21		544	167.116	98.467		544	70.038	223.696		544	290.79	578.256		544	116.582	215.624		544	273.059	44.508		544	75.357	200.765		544	69.151
545	90.872	34.976		545	53.193	323.608		545	92.645	370.679		545	114.366	503.31		545	115.252	53.788		545	145.395	50.878		545	167.116	94.265		545	70.038	225.051		545	290.79	575.716		545	116.582	211.665		545	273.059	43.786		545	75.357	201.765		545	69.151
546	90.872	35.01		546	53.193	327.467		546	92.645	356.77		546	114.366	492.791		546	115.252	53.731		546	145.395	54.131		546	167.116	97.578		546	70.038	222.152		546	290.79	583.569		546	116.582	213.251		546	273.059	45.045		546	75.357	203.006		546	69.151
547	90.872	33.746		547	53.193	326.033		547	92.645	353.919		547	114.366	487.981		547	115.252	52.681		547	145.395	54.463		547	167.116	94.268		547	70.038	221.38		547	290.79	583.276		547	116.582	213.433		547	273.059	43.216		547	75.357	198.182		547	69.151
548	90.872	34.351		548	53.193	329.692		548	92.645	369.9		548	114.366	488.543		548	115.252	50.231		548	145.395	53.238		548	167.116	96.26		548	70.038	226.127		548	290.79	580.863		548	116.582	211.548		548	273.059	44.807		548	75.357	193.594		548	69.151
549	90.872	35.244		549	53.193	328.167		549	92.645	359.55		549	114.366	492.116		549	115.252	50.927		549	145.395	51.753		549	167.116	94.419		549	70.038	222.93		549	290.79	583.34		549	116.582	219.023		549	273.059	42.945		549	75.357	193.659		549	69.151
550	90.872	34.722		550	53.193	311.417		550	92.645	349.761		550	114.366	495.023		550	115.252	51.55		550	145.395	54.96		550	167.116	95.236		550	70.038	217.494		550	290.79	579.104		550	116.582	217.483		550	273.059	44.269		550	75.357	195.359		550	69.151
551	90.872	36.18		551	53.193	326.858		551	92.645	345.785		551	114.366	499.14		551	115.252	48.331		551	145.395	54.741		551	167.116	96.196		551	70.038	222.285		551	290.79	583.259		551	116.582	214.297		551	273.059	43.799		551	75.357	197.106		551	69.151
552	90.872	34.58		552	53.193	330.958		552	92.645	348.12		552	114.366	489.124		552	115.252	50.442		552	145.395	51.713		552	167.116	99.83		552	70.038	217.101		552	290.79	584.206		552	116.582	214.414		552	273.059	43.677		552	75.357	208.771		552	69.151
553	90.872	34.127		553	53.193	315.55		553	92.645	348.871		553	114.366	480.295		553	115.252	52.646		553	145.395	53.47		553	167.116	97.727		553	70.038	218.753		553	290.79	589.758		553	116.582	215.133		553	273.059	43.011		553	75.357	187.565		553	69.151
554	90.872	35.127		554	53.193	333.992		554	92.645	358.828		554	114.366	485.349		554	115.252	50.585		554	145.395	53.226		554	167.116	94.475		554	70.038	217.791		554	290.79	586.312		554	116.582	213.806		554	273.059	43.489		554	75.357	203.171		554	69.151
555	90.872	33.893		555	53.193	324.283		555	92.645	335.134		555	114.366	481.081		555	115.252	50.338		555	145.395	54.308		555	167.116	94.459		555	70.038	220.127		555	290.79	580.18		555	116.582	208.042		555	273.059	43.575		555	75.357	205.082		555	69.151
556	90.872	32.498		556	53.193	337.242		556	92.645	346.043		556	114.366	482.775		556	115.252	49.996		556	145.395	56.47		556	167.116	95.838		556	70.038	224.177		556	290.79	573.573		556	116.582	216.464		556	273.059	43.95		556	75.357	188.5		556	69.151
557	90.872	36.093		557	53.193	326.892		557	92.645	341.254		557	114.366	484.868		557	115.252	53.527		557	145.395	51.585		557	167.116	97.082		557	70.038	222.032		557	290.79	570.774		557	116.582	217.175		557	273.059	43.792		557	75.357	197.482		557	69.151
558	90.872	35.415		558	53.193	319.35		558	92.645	350.258		558	114.366	490.155		558	115.252	51.792		558	145.395	54.625		558	167.116	96.546		558	70.038	210.905		558	290.79	568.761		558	116.582	211.954		558	273.059	44.864		558	75.357	195.865		558	69.151
559	90.872	33.639		559	53.193	330.958		559	92.645	344.756		559	114.366	484.744		559	115.252	54.3		559	145.395	53.497		559	167.116	94.544		559	70.038	215.43		559	290.79	557.724		559	116.582	206.194		559	273.059	43.682		559	75.357	198.953		559	69.151
560	90.872	35.439		560	53.193	326.892		560	92.645	339.258		560	114.366	491.833		560	115.252	53.2		560	145.395	55.216		560	167.116	94.801		560	70.038	228.823		560	290.79	568.857		560	116.582	213.209		560	273.059	44.813		560	75.357	199.929		560	69.151
561	90.872	34.224		561	53.193	341.742		561	92.645	344.23		561	114.366	488.795		561	115.252	50.696		561	145.395	56.97		561	167.116	93.045		561	70.038	220.506		561	290.79	565.995		561	116.582	211.783		561	273.059	43.489		561	75.357	195.006		561	69.151
562	90.872	38.385		562	53.193	348.55		562	92.645	329.062		562	114.366	489.624		562	115.252	50.873		562	145.395	55.665		562	167.116	100.21		562	70.038	219.361		562	290.79	567.774		562	116.582	210.662		562	273.059	43.891		562	75.357	194.388		562	69.151
563	90.872	36.644		563	53.193	346.508		563	92.645	342.799		563	114.366	497.578		563	115.252	52.658		563	145.395	53.716		563	167.116	96.162		563	70.038	217.671		563	290.79	574.223		563	116.582	203.734		563	273.059	43.593		563	75.357	196.371		563	69.151
564	90.872	35.551		564	53.193	324		564	92.645	337.598		564	114.366	493.205		564	115.252	51.954		564	145.395	52.28		564	167.116	95.061		564	70.038	213.082		564	290.79	572.593		564	116.582	207.848		564	273.059	43.321		564	75.357	189.829		564	69.151
565	90.872	35.39		565	53.193	336.158		565	92.645	337.684		565	114.366	484.787		565	115.252	46.162		565	145.395	51.896		565	167.116	91.414		565	70.038	218.177		565	290.79	576.982		565	116.582	208.179		565	273.059	43.138		565	75.357	202.112		565	69.151
566	90.872	34.229		566	53.193	323.067		566	92.645	340.45		566	114.366	484.88		566	115.252	48.531		566	145.395	54.113		566	167.116	97.249		566	70.038	219.07		566	290.79	574.248		566	116.582	217.103		566	273.059	42.604		566	75.357	198.4		566	69.151
567	90.872	36.151		567	53.193	324.842		567	92.645	342.062		567	114.366	486.322		567	115.252	52.473		567	145.395	54.314		567	167.116	96.456		567	70.038	222.139		567	290.79	581.963		567	116.582	210.681		567	273.059	44.349		567	75.357	195.988		567	69.151
568	90.872	34.356		568	53.193	334.108		568	92.645	338.789		568	114.366	491.147		568	115.252	52.742		568	145.395	53.088		568	167.116	97.225		568	70.038	216.608		568	290.79	578.085		568	116.582	210.939		568	273.059	44.019		568	75.357	197.924		568	69.151
569	90.872	33.99		569	53.193	331.008		569	92.645	342.105		569	114.366	497.047		569	115.252	50.615		569	145.395	53.887		569	167.116	95.178		569	70.038	214.873		569	290.79	575.747		569	116.582	210.51		569	273.059	44.89		569	75.357	193.641		569	69.151
570	90.872	35.137		570	53.193	337.525		570	92.645	339.574		570	114.366	496.868		570	115.252	51.612		570	145.395	54.296		570	167.116	95.464		570	70.038	220.601		570	290.79	580.253		570	116.582	208.068		570	273.059	44.058		570	75.357	193.147		570	69.151
571	90.872	34.346		571	53.193	347.742		571	92.645	345.225		571	114.366	483.988		571	115.252	51.458		571	145.395	53.707		571	167.116	95.875		571	70.038	217.456		571	290.79	579.63		571	116.582	210.418		571	273.059	43.779		571	75.357	187.506		571	69.151
572	90.872	33.571		572	53.193	338.383		572	92.645	344.67		572	114.366	491.167		572	115.252	51.077		572	145.395	53.53		572	167.116	100.843		572	70.038	224.025		572	290.79	575.373		572	116.582	213.973		572	273.059	42.862		572	75.357	192.541		572	69.151
573	90.872	35.673		573	53.193	335.717		573	92.645	350.206		573	114.366	489.124		573	115.252	52.004		573	145.395	51.11		573	167.116	95.706		573	70.038	218.38		573	290.79	583.562		573	116.582	214.053		573	273.059	43.359		573	75.357	200.494		573	69.151
574	90.872	35.922		574	53.193	327.275		574	92.645	344.938		574	114.366	487.058		574	115.252	45.404		574	145.395	52.659		574	167.116	94.082		574	70.038	218.367		574	290.79	576.219		574	116.582	214.407		574	273.059	43.159		574	75.357	196.741		574	69.151
575	90.872	35.327		575	53.193	325.358		575	92.645	356.115		575	114.366	485.36		575	115.252	49.681		575	145.395	53.966		575	167.116	94.602		575	70.038	213.468		575	290.79	572.755		575	116.582	212.544		575	273.059	43.247		575	75.357	187.853		575	69.151
576	90.872	35.663		576	53.193	330.175		576	92.645	352.096		576	114.366	485.093		576	115.252	51.873		576	145.395	52.259		576	167.116	94.44		576	70.038	206.684		576	290.79	580.247		576	116.582	217.144		576	273.059	42.391		576	75.357	190.024		576	69.151
577	90.872	35.546		577	53.193	338.492		577	92.645	349.928		577	114.366	482.271		577	115.252	48.581		577	145.395	56.677		577	167.116	96.57		577	70.038	220.69		577	290.79	578.399		577	116.582	213.913		577	273.059	43.615		577	75.357	193.618		577	69.151
578	90.872	33.707		578	53.193	336.35		578	92.645	347.722		578	114.366	472.519		578	115.252	50.627		578	145.395	53.527		578	167.116	95.456		578	70.038	217.513		578	290.79	581.087		578	116.582	218.247		578	273.059	44.396		578	75.357	203.106		578	69.151
579	90.872	33.883		579	53.193	330.017		579	92.645	350.919		579	114.366	492.085		579	115.252	50.423		579	145.395	52.628		579	167.116	93.393		579	70.038	220.696		579	290.79	577.168		579	116.582	209.589		579	273.059	44.284		579	75.357	198.494		579	69.151
580	90.872	37.824		580	53.193	341.55		580	92.645	342.794		580	114.366	486.589		580	115.252	51.262		580	145.395	53.552		580	167.116	94.159		580	70.038	216.81		580	290.79	576.971		580	116.582	212.243		580	273.059	45.554		580	75.357	199.824		580	69.151
581	90.872	34.463		581	53.193	332.017		581	92.645	344.201		581	114.366	481.853		581	115.252	52.238		581	145.395	53.927		581	167.116	101.462		581	70.038	222.241		581	290.79	575.966		581	116.582	216.19		581	273.059	44.808		581	75.357	193.265		581	69.151
582	90.872	33.951		582	53.193	341.542		582	92.645	358.603		582	114.366	487.911		582	115.252	51.188		582	145.395	52.716		582	167.116	95.175		582	70.038	215.513		582	290.79	575.558		582	116.582	213.688		582	273.059	45.383		582	75.357	203.171		582	69.151
583	90.872	34.898		583	53.193	338.742		583	92.645	353.244		583	114.366	488.659		583	115.252	48.669		583	145.395	53.454		583	167.116	92.947		583	70.038	209.07		583	290.79	572.585		583	116.582	210.669		583	273.059	43.68		583	75.357	193.4		583	69.151
584	90.872	33.278		584	53.193	326.108		584	92.645	346.536		584	114.366	486.535		584	115.252	52.173		584	145.395	54.777		584	167.116	94.196		584	70.038	216.557		584	290.79	572.826		584	116.582	212.772		584	273.059	42.912		584	75.357	189.747		584	69.151
585	90.872	34.356		585	53.193	340.8		585	92.645	344.263		585	114.366	499.492		585	115.252	50.5		585	145.395	53.256		585	167.116	98.064		585	70.038	224.937		585	290.79	577.261		585	116.582	215.274		585	273.059	44.175		585	75.357	192.906		585	69.151
586	90.872	35.21		586	53.193	341.65		586	92.645	349.215		586	114.366	484		586	115.252	49.558		586	145.395	55.204		586	167.116	94.66		586	70.038	209.816		586	290.79	577.419		586	116.582	211.27		586	273.059	45.112		586	75.357	189.453		586	69.151
587	90.872	35.995		587	53.193	339.133		587	92.645	348.646		587	114.366	481.481		587	115.252	52.696		587	145.395	54.088		587	167.116	96.867		587	70.038	220.772		587	290.79	575.198		587	116.582	211.582		587	273.059	44.023		587	75.357	187.224		587	69.151
588	90.872	35.624		588	53.193	321.4		588	92.645	338.258		588	114.366	476.357		588	115.252	49.523		588	145.395	52.259		588	167.116	94.43		588	70.038	217.918		588	290.79	570.54		588	116.582	216.422		588	273.059	44.43		588	75.357	190.665		588	69.151
589	90.872	36.049		589	53.193	338.592		589	92.645	340.967		589	114.366	495.128		589	115.252	47.823		589	145.395	52.89		589	167.116	93.406		589	70.038	216.81		589	290.79	578.535		589	116.582	210.578		589	273.059	44.469		589	75.357	193.659		589	69.151
590	90.872	36.678		590	53.193	341.958		590	92.645	348.871		590	114.366	490.864		590	115.252	47.562		590	145.395	50.942		590	167.116	96.711		590	70.038	220.424		590	290.79	578.569		590	116.582	214.179		590	273.059	45.919		590	75.357	206.376		590	69.151
591	90.872	35.117		591	53.193	336.433		591	92.645	348.636		591	114.366	492.112		591	115.252	48.465		591	145.395	52.332		591	167.116	94.676		591	70.038	210.614		591	290.79	572.474		591	116.582	212.631		591	273.059	43.13		591	75.357	191.424		591	69.151
592	90.872	33.751		592	53.193	341.292		592	92.645	351.531		592	114.366	481.45		592	115.252	48.015		592	145.395	50.915		592	167.116	91.936		592	70.038	212.044		592	290.79	576.558		592	116.582	209.916		592	273.059	44.81		592	75.357	191.047		592	69.151
593	90.872	37.361		593	53.193	360.717		593	92.645	348.096		593	114.366	485.19		593	115.252	48.25		593	145.395	51.838		593	167.116	93.133		593	70.038	213.601		593	290.79	572.229		593	116.582	212.388		593	273.059	45.731		593	75.357	195.029		593	69.151
594	90.872	33.859		594	53.193	349.3		594	92.645	352.407		594	114.366	493.674		594	115.252	48.988		594	145.395	50.707		594	167.116	94.016		594	70.038	205.658		594	290.79	565.816		594	116.582	208.042		594	273.059	44.536		594	75.357	200.771		594	69.151
595	90.872	34.883		595	53.193	338.442		595	92.645	350.971		595	114.366	488.981		595	115.252	48.312		595	145.395	51.924		595	167.116	93.085		595	70.038	218.816		595	290.79	560.713		595	116.582	209.03		595	273.059	43.312		595	75.357	201.071		595	69.151
596	90.872	34.502		596	53.193	356		596	92.645	347.038		596	114.366	487.512		596	115.252	52.438		596	145.395	51.332		596	167.116	96.379		596	70.038	216.753		596	290.79	553.236		596	116.582	207.361		596	273.059	43.619		596	75.357	197.382		596	69.151
597	90.872	33.585		597	53.193	344.467		597	92.645	345.603		597	114.366	480.054		597	115.252	46.065		597	145.395	51.93		597	167.116	90.934		597	70.038	213.981		597	290.79	569.598		597	116.582	208.734		597	273.059	42.232		597	75.357	200.029		597	69.151
598	90.872	35.21		598	53.193	336.35		598	92.645	349.397		598	114.366	485.244		598	115.252	51.404		598	145.395	51.192		598	167.116	94.979		598	70.038	221.013		598	290.79	573.175		598	116.582	207.479		598	273.059	41.448		598	75.357	189.265		598	69.151
599	90.872	34.707		599	53.193	339.092		599	92.645	351.565		599	114.366	490.345		599	115.252	49.269		599	145.395	50.399		599	167.116	91.34		599	70.038	218.854		599	290.79	576.768		599	116.582	212.939		599	273.059	43.476		599	75.357	195.941		599	69.151
600	90.872	36.049		600	53.193	348.9		600	92.645	345.89		600	114.366	481.926		600	115.252	46.881		600	145.395	53.582		600	167.116	94.053		600	70.038	213.715		600	290.79	567.805		600	116.582	199.768		600	273.059	43.87		600	75.357	197.171		600	69.151
601	90.872	35.405		601	53.193	349.142		601	92.645	342.124		601	114.366	488.36		601	115.252	49.335		601	145.395	49.756		601	167.116	96.544		601	70.038	212.291		601	290.79	563.733		601	116.582	207.392		601	273.059	43.282		601	75.357	207.541		601	69.151
602	90.872	34.649		602	53.193	340.75		602	92.645	339.522		602	114.366	485.019		602	115.252	48.969		602	145.395	50.665		602	167.116	90.427		602	70.038	216.329		602	290.79	566.814		602	116.582	204.338		602	273.059	41.094		602	75.357	199.959		602	69.151
603	90.872	34.702		603	53.193	336.708		603	92.645	358.191		603	114.366	489.081		603	115.252	49.665		603	145.395	50.747		603	167.116	90.021		603	70.038	213.519		603	290.79	574.255		603	116.582	214.901		603	273.059	44.083		603	75.357	199.029		603	69.151
604	90.872	35.21		604	53.193	333.9		604	92.645	348.675		604	114.366	488.915		604	115.252	49.488		604	145.395	50.134		604	167.116	93.759		604	70.038	212.253		604	290.79	570.171		604	116.582	211.076		604	273.059	42.956		604	75.357	189.171		604	69.151
605	90.872	34.82		605	53.193	346.483		605	92.645	351.919		605	114.366	477.229		605	115.252	48.104		605	145.395	51.927		605	167.116	94.645		605	70.038	206.019		605	290.79	576.706		605	116.582	211.494		605	273.059	41.924		605	75.357	197.124		605	69.151
606	90.872	38.429		606	53.193	328.533		606	92.645	344.297		606	114.366	486.155		606	115.252	48.465		606	145.395	52.29		606	167.116	96.504		606	70.038	206.741		606	290.79	567.899		606	116.582	209.738		606	273.059	42.984		606	75.357	196.941		606	69.151
607	90.872	35.205		607	53.193	332.475		607	92.645	356.689		607	114.366	489.295		607	115.252	50.158		607	145.395	51.299		607	167.116	94.528		607	70.038	213.12		607	290.79	572.476		607	116.582	208.932		607	273.059	41.885		607	75.357	189.559		607	69.151
608	90.872	34.79		608	53.193	342.342		608	92.645	352.852		608	114.366	484.616		608	115.252	51.081		608	145.395	48.576		608	167.116	95.414		608	70.038	210.956		608	290.79	562.729		608	116.582	211.319		608	273.059	41.388		608	75.357	186.088		608	69.151
609	90.872	35.049		609	53.193	346.258		609	92.645	354.464		609	114.366	479.88		609	115.252	47.654		609	145.395	50.485		609	167.116	89.777		609	70.038	209.418		609	290.79	580.535		609	116.582	217.57		609	273.059	43.015		609	75.357	202.082		609	69.151
610	90.872	36.049		610	53.193	345.608		610	92.645	351.105		610	114.366	477.632		610	115.252	50.227		610	145.395	50.957		610	167.116	92.592		610	70.038	210.462		610	290.79	576.447		610	116.582	211.684		610	273.059	44.323		610	75.357	189.882		610	69.151
611	90.872	34.507		611	53.193	341.042		611	92.645	343.474		611	114.366	469.868		611	115.252	48.973		611	145.395	51.625		611	167.116	94.093		611	70.038	213.07		611	290.79	569.837		611	116.582	206.722		611	273.059	44.825		611	75.357	197.676		611	69.151
612	90.872	35.493		612	53.193	341.667		612	92.645	339.464		612	114.366	474.829		612	115.252	50.792		612	145.395	50.024		612	167.116	94.252		612	70.038	207.424		612	290.79	574.715		612	116.582	211.749		612	273.059	43.779		612	75.357	188.453		612	69.151
613	90.872	34.224		613	53.193	341.267		613	92.645	347.89		613	114.366	470.554		613	115.252	49.462		613	145.395	51.598		613	167.116	89.286		613	70.038	219.335		613	290.79	573.983		613	116.582	214.319		613	273.059	43.661		613	75.357	193.471		613	69.151
614	90.872	32.722		614	53.193	347.483		614	92.645	343.928		614	114.366	478.868		614	115.252	47.265		614	145.395	52.488		614	167.116	94.064		614	70.038	214.196		614	290.79	569.572		614	116.582	213.574		614	273.059	43.476		614	75.357	198.318		614	69.151
615	90.872	32.737		615	53.193	358.192		615	92.645	347.273		615	114.366	473.888		615	115.252	46.908		615	145.395	54.372		615	167.116	92.594		615	70.038	214.259		615	290.79	576.604		615	116.582	210.103		615	273.059	43.119		615	75.357	193.747		615	69.151
616	90.872	35.512		616	53.193	351.108		616	92.645	342.23		616	114.366	458.674		616	115.252	51.119		616	145.395	52.131		616	167.116	95.952		616	70.038	218.975		616	290.79	568.776		616	116.582	213.095		616	273.059	44.484		616	75.357	197.047		616	69.151
617	90.872	33.732		617	53.193	341.583		617	92.645	338.579		617	114.366	463.64		617	115.252	47.746		617	145.395	51.427		617	167.116	91.257		617	70.038	212.513		617	290.79	570.939		617	116.582	206.916		617	273.059	44.099		617	75.357	189.453		617	69.151
618	90.872	33.141		618	53.193	347.817		618	92.645	342.187		618	114.366	473.027		618	115.252	48.7		618	145.395	51.262		618	167.116	94.292		618	70.038	215.323		618	290.79	569.029		618	116.582	218.232		618	273.059	43.907		618	75.357	196.982		618	69.151
619	90.872	36.922		619	53.193	340.992		619	92.645	334.258		619	114.366	472.95		619	115.252	47.935		619	145.395	51.811		619	167.116	94.279		619	70.038	224		619	290.79	573.169		619	116.582	215.437		619	273.059	43.893		619	75.357	201.624		619	69.151
620	90.872	36.156		620	53.193	334.383		620	92.645	338.885		620	114.366	472.566		620	115.252	49.15		620	145.395	51.402		620	167.116	93.406		620	70.038	219.462		620	290.79	570.13		620	116.582	211.266		620	273.059	43.891		620	75.357	191.8		620	69.151
621	90.872	36.912		621	53.193	335.367		621	92.645	327.938		621	114.366	478.047		621	115.252	45.169		621	145.395	52.235		621	167.116	94.981		621	70.038	213.703		621	290.79	568.799		621	116.582	210.973		621	273.059	42.006		621	75.357	193.276		621	69.151
622	90.872	34.034		622	53.193	339.992		622	92.645	336.244		622	114.366	478.035		622	115.252	47.55		622	145.395	50.055		622	167.116	89.401		622	70.038	218.006		622	290.79	564.881		622	116.582	211.981		622	273.059	43.568		622	75.357	193.665		622	69.151
623	90.872	35.049		623	53.193	333.717		623	92.645	342.565		623	114.366	477.791		623	115.252	51.123		623	145.395	51.732		623	167.116	89.403		623	70.038	211		623	290.79	562.867		623	116.582	213.962		623	273.059	42.765		623	75.357	200.929		623	69.151
624	90.872	34.483		624	53.193	338.708		624	92.645	338.603		624	114.366	459.419		624	115.252	45.388		624	145.395	52.476		624	167.116	90.186		624	70.038	204.696		624	290.79	562.623		624	116.582	211.962		624	273.059	42.532		624	75.357	197.253		624	69.151
625	90.872	37.273		625	53.193	342.467		625	92.645	339.9		625	114.366	469.616		625	115.252	44.469		625	145.395	51.872		625	167.116	88.244		625	70.038	220.108		625	290.79	573.079		625	116.582	211.639		625	273.059	42.612		625	75.357	198.147		625	69.151
626	90.872	36.922		626	53.193	341.967		626	92.645	330.12		626	114.366	469.5		626	115.252	48.881		626	145.395	49.055		626	167.116	90.714		626	70.038	219.424		626	290.79	569.84		626	116.582	212.281		626	273.059	41.677		626	75.357	195.2		626	69.151
627	90.872	35.063		627	53.193	340.15		627	92.645	329.785		627	114.366	468.357		627	115.252	43.808		627	145.395	53.189		627	167.116	89.39		627	70.038	210.481		627	290.79	572.663		627	116.582	211.624		627	273.059	43.256		627	75.357	193.476		627	69.151
628	90.872	35.6		628	53.193	343.333		628	92.645	333.981		628	114.366	461.736		628	115.252	47.523		628	145.395	50.622		628	167.116	86.66		628	70.038	212.608		628	290.79	567.413		628	116.582	211.909		628	273.059	42.948		628	75.357	190.641		628	69.151
629	90.872	36.117		629	53.193	354.942		629	92.645	328.478		629	114.366	453.694		629	115.252	46.458		629	145.395	52.61		629	167.116	88.379		629	70.038	226.127		629	290.79	576.854		629	116.582	212.186		629	273.059	41.946		629	75.357	198.7		629	69.151
630	90.872	35.254		630	53.193	347.8		630	92.645	336.689		630	114.366	456.884		630	115.252	46.823		630	145.395	50.607		630	167.116	87.469		630	70.038	225.753		630	290.79	570.494		630	116.582	211.373		630	273.059	43.786		630	75.357	194.459		630	69.151
631	90.872	36.273		631	53.193	324.075		631	92.645	332.431		631	114.366	458.457		631	115.252	45.892		631	145.395	51.567		631	167.116	92.809		631	70.038	215.557		631	290.79	570.194		631	116.582	209.92		631	273.059	41.942		631	75.357	194.894		631	69.151
632	90.872	36.366		632	53.193	337.575		632	92.645	328.536		632	114.366	462.016		632	115.252	46.012		632	145.395	51.482		632	167.116	89.438		632	70.038	214.101		632	290.79	576.835		632	116.582	209.985		632	273.059	43.102		632	75.357	190.776		632	69.151
633	90.872	34.854		633	53.193	320.825		633	92.645	334.923		633	114.366	455.849		633	115.252	45.646		633	145.395	48		633	167.116	87.385		633	70.038	222.778		633	290.79	572.907		633	116.582	208.262		633	273.059	42.869		633	75.357	187.124		633	69.151
634	90.872	33.556		634	53.193	323.342		634	92.645	323.555		634	114.366	464.45		634	115.252	47.823		634	145.395	52.671		634	167.116	87.271		634	70.038	229.854		634	290.79	575.991		634	116.582	208.373		634	273.059	43.308		634	75.357	195.265		634	69.151
635	90.872	35.532		635	53.193	343		635	92.645	337.215		635	114.366	468.213		635	115.252	46.285		635	145.395	53.915		635	167.116	87.952		635	70.038	214.291		635	290.79	568.453		635	116.582	209.373		635	273.059	41.654		635	75.357	191.553		635	69.151
636	90.872	35.59		636	53.193	334.475		636	92.645	328.464		636	114.366	464.446		636	115.252	45.512		636	145.395	51.104		636	167.116	88.326		636	70.038	206.07		636	290.79	567.252		636	116.582	205.019		636	273.059	42.992		636	75.357	190.582		636	69.151
637	90.872	37.268		637	53.193	326.475		637	92.645	322.215		637	114.366	466.752		637	115.252	48.258		637	145.395	53.201		637	167.116	87.676		637	70.038	219.924		637	290.79	565.8		637	116.582	213.779		637	273.059	43.481		637	75.357	193.171		637	69.151
638	90.872	36		638	53.193	327.283		638	92.645	332.148		638	114.366	481.783		638	115.252	47.669		638	145.395	53.186		638	167.116	87.382		638	70.038	213.082		638	290.79	572.962		638	116.582	207.266		638	273.059	42.648		638	75.357	191.3		638	69.151
639	90.872	34.532		639	53.193	324.242		639	92.645	326.818		639	114.366	477.097		639	115.252	44.738		639	145.395	52.963		639	167.116	89.241		639	70.038	215.177		639	290.79	566.872		639	116.582	206.981		639	273.059	40.708		639	75.357	185.235		639	69.151
640	90.872	35.659		640	53.193	333.033		640	92.645	339.665		640	114.366	466.636		640	115.252	44.923		640	145.395	50.024		640	167.116	84.581		640	70.038	208.544		640	290.79	578.381		640	116.582	200.209		640	273.059	41.628		640	75.357	198.147		640	69.151
641	90.872	34.688		641	53.193	318.108		641	92.645	330.598		641	114.366	484.058		641	115.252	45.046		641	145.395	50.442		641	167.116	90.584		641	70.038	219.962		641	290.79	584.674		641	116.582	206.985		641	273.059	44.339		641	75.357	187.2		641	69.151
642	90.872	36.088		642	53.193	329.192		642	92.645	334.813		642	114.366	476.058		642	115.252	42.985		642	145.395	51.375		642	167.116	86.061		642	70.038	219.759		642	290.79	580.954		642	116.582	206.148		642	273.059	42.875		642	75.357	184.494		642	69.151
643	90.872	34.82		643	53.193	322.75		643	92.645	330.947		643	114.366	477.283		643	115.252	47.373		643	145.395	51.845		643	167.116	89.836		643	70.038	215.399		643	290.79	565.328		643	116.582	200.133		643	273.059	42.274		643	75.357	188.859		643	69.151
644	90.872	33.473		644	53.193	327.9		644	92.645	326.139		644	114.366	475.004		644	115.252	46.788		644	145.395	53.954		644	167.116	88.382		644	70.038	215.443		644	290.79	573.671		644	116.582	207.285		644	273.059	42.562		644	75.357	185.712		644	69.151
645	90.872	34.82		645	53.193	341.042		645	92.645	327.703		645	114.366	471.616		645	115.252	45.281		645	145.395	51.768		645	167.116	84.637		645	70.038	217.127		645	290.79	566.355		645	116.582	205.08		645	273.059	42.745		645	75.357	189.406		645	69.151
646	90.872	35.42		646	53.193	333.6		646	92.645	325.598		646	114.366	463.992		646	115.252	48.081		646	145.395	54.293		646	167.116	88.382		646	70.038	208.918		646	290.79	565.017		646	116.582	203.776		646	273.059	42.304		646	75.357	193.253		646	69.151
647	90.872	34.98		647	53.193	328.483		647	92.645	324.478		647	114.366	466.124		647	115.252	46.427		647	145.395	55.171		647	167.116	86.021		647	70.038	221.797		647	290.79	579.024		647	116.582	198.658		647	273.059	41.716		647	75.357	182.559		647	69.151
648	90.872	36.185		648	53.193	333.025		648	92.645	326.904		648	114.366	482.651		648	115.252	43.146		648	145.395	56.186		648	167.116	86.952		648	70.038	217.335		648	290.79	567.527		648	116.582	202.426		648	273.059	42.721		648	75.357	185.753		648	69.151
649	90.872	35.946		649	53.193	350.142		649	92.645	323.545		649	114.366	476.674		649	115.252	45.919		649	145.395	54.591		649	167.116	91.735		649	70.038	219.576		649	290.79	570.252		649	116.582	200.886		649	273.059	41.438		649	75.357	187.324		649	69.151
650	90.872	35.239		650	53.193	334.95		650	92.645	326.957		650	114.366	461.519		650	115.252	43.058		650	145.395	54.924		650	167.116	87.162		650	70.038	213.481		650	290.79	577.628		650	116.582	200.293		650	273.059	42.69		650	75.357	186.247		650	69.151
651	90.872	36.902		651	53.193	328.883		651	92.645	324.675		651	114.366	465.329		651	115.252	44.596		651	145.395	53.229		651	167.116	86.891		651	70.038	212.076		651	290.79	577.672		651	116.582	193.913		651	273.059	42.601		651	75.357	187.576		651	69.151
652	90.872	35.78		652	53.193	315.15		652	92.645	316.368		652	114.366	472.984		652	115.252	47.969		652	145.395	55.122		652	167.116	82.265		652	70.038	220.285		652	290.79	569.477		652	116.582	204.829		652	273.059	42.055		652	75.357	176.953		652	69.151
653	90.872	36.259		653	53.193	332.317		653	92.645	323.325		653	114.366	474.798		653	115.252	44.769		653	145.395	54.518		653	167.116	87.435		653	70.038	221.203		653	290.79	570.209		653	116.582	202.996		653	273.059	42.721		653	75.357	192.106		653	69.151
654	90.872	35.785		654	53.193	329.708		654	92.645	329.871		654	114.366	475.128		654	115.252	44.581		654	145.395	53.335		654	167.116	87.952		654	70.038	213.108		654	290.79	568.628		654	116.582	201.285		654	273.059	42.313		654	75.357	190.612		654	69.151
655	90.872	34.459		655	53.193	314.017		655	92.645	335.483		655	114.366	476.686		655	115.252	44.246		655	145.395	55.171		655	167.116	88.39		655	70.038	213.842		655	290.79	573.07		655	116.582	198.897		655	273.059	43.266		655	75.357	187.606		655	69.151
656	90.872	37.229		656	53.193	318.142		656	92.645	324.254		656	114.366	466.364		656	115.252	43.819		656	145.395	53.668		656	167.116	86.623		656	70.038	202.994		656	290.79	569.213		656	116.582	198.726		656	273.059	42.424		656	75.357	194.912		656	69.151
657	90.872	35.746		657	53.193	317.692		657	92.645	339.938		657	114.366	468.558		657	115.252	44.054		657	145.395	56.088		657	167.116	84.448		657	70.038	213.475		657	290.79	572.48		657	116.582	199.677		657	273.059	43.846		657	75.357	183.376		657	69.151
658	90.872	34.395		658	53.193	323.908		658	92.645	332.923		658	114.366	474.469		658	115.252	43.223		658	145.395	57.655		658	167.116	88.501		658	70.038	205.437		658	290.79	572.102		658	116.582	195.734		658	273.059	41.125		658	75.357	180.012		658	69.151
659	90.872	33.517		659	53.193	329.592		659	92.645	327.589		659	114.366	467.023		659	115.252	44.765		659	145.395	54.546		659	167.116	89.082		659	70.038	211.715		659	290.79	574.716		659	116.582	199.487		659	273.059	40.756		659	75.357	196.329		659	69.151
660	90.872	36.512		660	53.193	321.475		660	92.645	330.837		660	114.366	466.233		660	115.252	43.162		660	145.395	54.159		660	167.116	86.39		660	70.038	215.899		660	290.79	576.628		660	116.582	197.099		660	273.059	43.099		660	75.357	192.647		660	69.151
661	90.872	34.224		661	53.193	318.033		661	92.645	327.713		661	114.366	462.915		661	115.252	45.862		661	145.395	54.591		661	167.116	86.96		661	70.038	210.778		661	290.79	581.085		661	116.582	197.81		661	273.059	44.938		661	75.357	185.929		661	69.151
662	90.872	37.156		662	53.193	319.25		662	92.645	318.435		662	114.366	456.453		662	115.252	44.969		662	145.395	55.046		662	167.116	89.671		662	70.038	211.981		662	290.79	576.188		662	116.582	189.821		662	273.059	41.865		662	75.357	188.029		662	69.151
663	90.872	35.878		663	53.193	328.5		663	92.645	323.78		663	114.366	462.554		663	115.252	44.181		663	145.395	55.201		663	167.116	90.069		663	70.038	218.316		663	290.79	589.372		663	116.582	201.7		663	273.059	40.557		663	75.357	189.006		663	69.151
664	90.872	36		664	53.193	315.075		664	92.645	316.77		664	114.366	466.376		664	115.252	43.35		664	145.395	52.738		664	167.116	87.764		664	70.038	208.601		664	290.79	583.235		664	116.582	201.905		664	273.059	42.19		664	75.357	193.635		664	69.151
665	90.872	33.512		665	53.193	321.125		665	92.645	320.775		665	114.366	462.012		665	115.252	44.665		665	145.395	52.421		665	167.116	87.711		665	70.038	224.373		665	290.79	578.959		665	116.582	197.202		665	273.059	41.817		665	75.357	194.524		665	69.151
666	90.872	35.912		666	53.193	304.6		666	92.645	322.072		666	114.366	474.109		666	115.252	44.419		666	145.395	56.936		666	167.116	90.141		666	70.038	219.297		666	290.79	580.998		666	116.582	196.981		666	273.059	41.865		666	75.357	183.688		666	69.151
667	90.872	35.02		667	53.193	321.7		667	92.645	326.952		667	114.366	463.822		667	115.252	47.108		667	145.395	55.463		667	167.116	89.239		667	70.038	211.171		667	290.79	571.521		667	116.582	201.262		667	273.059	40.959		667	75.357	184.494		667	69.151
668	90.872	33.698		668	53.193	313.65		668	92.645	313.206		668	114.366	470.806		668	115.252	43.819		668	145.395	54.933		668	167.116	85.61		668	70.038	226.747		668	290.79	569.649		668	116.582	189.152		668	273.059	41.906		668	75.357	183.547		668	69.151
669	90.872	35.244		669	53.193	316.833		669	92.645	315.335		669	114.366	466.845		669	115.252	45.231		669	145.395	51.098		669	167.116	89.233		669	70.038	213.449		669	290.79	576.341		669	116.582	198.772		669	273.059	39.885		669	75.357	181.647		669	69.151
670	90.872	34.395		670	53.193	312.292		670	92.645	309.091		670	114.366	460.899		670	115.252	43.781		670	145.395	54.009		670	167.116	87.737		670	70.038	224.285		670	290.79	565.439		670	116.582	197.886		670	273.059	42.468		670	75.357	197.876		670	69.151
671	90.872	34.02		671	53.193	324.358		671	92.645	322.33		671	114.366	458.95		671	115.252	47.45		671	145.395	54.405		671	167.116	89.088		671	70.038	215.829		671	290.79	577.438		671	116.582	197.373		671	273.059	39.843		671	75.357	195.341		671	69.151
672	90.872	33.429		672	53.193	312.2		672	92.645	315.976		672	114.366	455.957		672	115.252	47.169		672	145.395	53.988		672	167.116	87.631		672	70.038	219.177		672	290.79	573.913		672	116.582	195.643		672	273.059	40.396		672	75.357	191.741		672	69.151
673	90.872	34.834		673	53.193	310.225		673	92.645	311.967		673	114.366	452.543		673	115.252	42.708		673	145.395	56.223		673	167.116	88.878		673	70.038	223.899		673	290.79	580.915		673	116.582	192.11		673	273.059	41.482		673	75.357	187.706		673	69.151
674	90.872	35.141		674	53.193	313.008		674	92.645	321.995		674	114.366	452.516		674	115.252	41.038		674	145.395	55.433		674	167.116	89.414		674	70.038	214.342		674	290.79	575.841		674	116.582	194.35		674	273.059	39.992		674	75.357	190.453		674	69.151
675	90.872	35.82		675	53.193	316.925		675	92.645	308.282		675	114.366	460.136		675	115.252	41.085		675	145.395	53.128		675	167.116	89.332		675	70.038	224.462		675	290.79	574.18		675	116.582	193.741		675	273.059	39.708		675	75.357	188.671		675	69.151
676	90.872	34.385		676	53.193	319.508		676	92.645	325.641		676	114.366	459.279		676	115.252	44.631		676	145.395	56.841		676	167.116	90.337		676	70.038	221.335		676	290.79	575.154		676	116.582	193.03		676	273.059	38.731		676	75.357	194.347		676	69.151
677	90.872	33.863		677	53.193	308.933		677	92.645	312.502		677	114.366	452.899		677	115.252	45.965		677	145.395	55.104		677	167.116	88.159		677	70.038	214.424		677	290.79	560.154		677	116.582	199.392		677	273.059	41.946		677	75.357	186.547		677	69.151
678	90.872	36.424		678	53.193	315.083		678	92.645	306.995		678	114.366	453.62		678	115.252	43.712		678	145.395	58.095		678	167.116	89.414		678	70.038	222.335		678	290.79	575.822		678	116.582	190.232		678	273.059	42.352		678	75.357	183.218		678	69.151
679	90.872	35.976		679	53.193	310.983		679	92.645	317.555		679	114.366	450.198		679	115.252	43.654		679	145.395	54.924		679	167.116	89.812		679	70.038	215.905		679	290.79	565.768		679	116.582	198.171		679	273.059	41.64		679	75.357	184.788		679	69.151
680	90.872	34.38		680	53.193	317.95		680	92.645	308.421		680	114.366	459.473		680	115.252	41.623		680	145.395	55.265		680	167.116	90.167		680	70.038	212.918		680	290.79	573.546		680	116.582	187.027		680	273.059	40.141		680	75.357	187.453		680	69.151
681	90.872	36.332		681	53.193	294.517		681	92.645	313.115		681	114.366	460.581		681	115.252	40.942		681	145.395	54.5		681	167.116	90.435		681	70.038	214.937		681	290.79	566.765		681	116.582	192.384		681	273.059	38.706		681	75.357	187.1		681	69.151
682	90.872	34.678		682	53.193	304.183		682	92.645	310.34		682	114.366	467.174		682	115.252	43.296		682	145.395	53.829		682	167.116	90.637		682	70.038	212.892		682	290.79	580.503		682	116.582	192.958		682	273.059	40.271		682	75.357	179.8		682	69.151
683	90.872	36.102		683	53.193	303.65		683	92.645	308.282		683	114.366	473.395		683	115.252	44.512		683	145.395	52.143		683	167.116	90.475		683	70.038	214.373		683	290.79	567.39		683	116.582	195.365		683	273.059	40.682		683	75.357	188.812		683	69.151
684	90.872	37.98		684	53.193	299.267		684	92.645	308.78		684	114.366	455.24		684	115.252	43.769		684	145.395	54.716		684	167.116	93.411		684	70.038	213.81		684	290.79	559.931		684	116.582	192.966		684	273.059	41.834		684	75.357	195.706		684	69.151
685	90.872	37.59		685	53.193	322.092		685	92.645	307.545		685	114.366	464.469		685	115.252	43.315		685	145.395	51.375		685	167.116	91.576		685	70.038	204.639		685	290.79	566.899		685	116.582	189.175		685	273.059	40.438		685	75.357	185.476		685	69.151
686	90.872	35.517		686	53.193	312.292		686	92.645	309.493		686	114.366	461.965		686	115.252	43.154		686	145.395	57.006		686	167.116	92.772		686	70.038	202.563		686	290.79	562.944		686	116.582	195.593		686	273.059	40.279		686	75.357	184.547		686	69.151
687	90.872	34.561		687	53.193	299.333		687	92.645	309.89		687	114.366	455.039		687	115.252	43.723		687	145.395	51.689		687	167.116	92.053		687	70.038	208.184		687	290.79	560.585		687	116.582	197.863		687	273.059	40.497		687	75.357	180.629		687	69.151
688	90.872	36.127		688	53.193	297.383		688	92.645	304.225		688	114.366	466.407		688	115.252	43.45		688	145.395	52.835		688	167.116	89.416		688	70.038	213.582		688	290.79	564.91		688	116.582	192.631		688	273.059	42.172		688	75.357	180.894		688	69.151
689	90.872	33.478		689	53.193	295.775		689	92.645	314.967		689	114.366	463.388		689	115.252	43.604		689	145.395	56.326		689	167.116	89.989		689	70.038	203.146		689	290.79	563.073		689	116.582	193.144		689	273.059	41.42		689	75.357	188.653		689	69.151
690	90.872	36.649		690	53.193	306.283		690	92.645	300.88		690	114.366	461.151		690	115.252	44.896		690	145.395	52.305		690	167.116	89.873		690	70.038	212.006		690	290.79	573.585		690	116.582	182.038		690	273.059	39.963		690	75.357	178.629		690	69.151
691	90.872	34.395		691	53.193	324.15		691	92.645	304.335		691	114.366	454.946		691	115.252	40.996		691	145.395	53.796		691	167.116	88.586		691	70.038	203.589		691	290.79	570.95		691	116.582	190.232		691	273.059	41.752		691	75.357	175.259		691	69.151
692	90.872	35.898		692	53.193	300.467		692	92.645	308.057		692	114.366	454.372		692	115.252	42.181		692	145.395	55.716		692	167.116	87.172		692	70.038	200.171		692	290.79	580.017		692	116.582	196.03		692	273.059	40.494		692	75.357	184.806		692	69.151
693	90.872	36.2		693	53.193	302.592		693	92.645	298.751		693	114.366	461.965		693	115.252	43.4		693	145.395	55.793		693	167.116	88.385		693	70.038	204.671		693	290.79	573.377		693	116.582	192.84		693	273.059	40.748		693	75.357	182.224		693	69.151
694	90.872	35.239		694	53.193	295.783		694	92.645	307.421		694	114.366	464.05		694	115.252	44.573		694	145.395	53.232		694	167.116	91.247		694	70.038	197.905		694	290.79	579.465		694	116.582	198.445		694	273.059	39.274		694	75.357	179.865		694	69.151
695	90.872	35.927		695	53.193	298.5		695	92.645	314.828		695	114.366	460.016		695	115.252	42.419		695	145.395	54.863		695	167.116	92.398		695	70.038	204.785		695	290.79	573.331		695	116.582	185.221		695	273.059	42.536		695	75.357	179.8		695	69.151
696	90.872	35.039		696	53.193	303.658		696	92.645	311.33		696	114.366	455.624		696	115.252	45.4		696	145.395	53.052		696	167.116	89.512		696	70.038	196.373		696	290.79	578.168		696	116.582	195.996		696	273.059	40.763		696	75.357	187.559		696	69.151
697	90.872	37.278		697	53.193	309.358		697	92.645	303.589		697	114.366	459.248		697	115.252	45.565		697	145.395	55.954		697	167.116	90.196		697	70.038	192.791		697	290.79	572.441		697	116.582	188.943		697	273.059	41.628		697	75.357	173.965		697	69.151
698	90.872	31.488		698	53.193	288.508		698	92.645	310.282		698	114.366	466.333		698	115.252	42.765		698	145.395	53.332		698	167.116	88.74		698	70.038	194.405		698	290.79	571.752		698	116.582	191.087		698	273.059	41.844		698	75.357	189.747		698	69.151
699	90.872	35.4		699	53.193	305.133		699	92.645	320.445		699	114.366	456.554		699	115.252	43.992		699	145.395	50.323		699	167.116	90.164		699	70.038	190.354		699	290.79	574.733		699	116.582	186.03		699	273.059	40.541		699	75.357	180.271		699	69.151
700	90.872	33.854		700	53.193	309.583		700	92.645	315.502		700	114.366	457.508		700	115.252	42.896		700	145.395	53.683		700	167.116	94.342		700	70.038	196.133		700	290.79	576.338		700	116.582	193.327		700	273.059	39.935		700	75.357	176.729		700	69.151
701	90.872	34.073		701	53.193	288.733		701	92.645	311.684		701	114.366	463.628		701	115.252	44.527		701	145.395	53.201		701	167.116	95.019		701	70.038	181.089		701	290.79	563.119		701	116.582	193.414		701	273.059	41.162		701	75.357	184.712		701	69.151
702	90.872	34.268		702	53.193	292.758		702	92.645	309.077		702	114.366	455.671		702	115.252	43.419		702	145.395	51.933		702	167.116	90.544		702	70.038	183.658		702	290.79	572.799		702	116.582	192.707		702	273.059	41.213		702	75.357	185.012		702	69.151
703	90.872	34.351		703	53.193	292.475		703	92.645	307.88		703	114.366	470.597		703	115.252	43.938		703	145.395	52.354		703	167.116	92.167		703	70.038	191		703	290.79	563.713		703	116.582	191.323		703	273.059	40.945		703	75.357	184.3		703	69.151
704	90.872	34.02		704	53.193	299.45		704	92.645	309.502		704	114.366	464.787		704	115.252	45.169		704	145.395	52.378		704	167.116	91.623		704	70.038	184.443		704	290.79	568.826		704	116.582	189.909		704	273.059	40.877		704	75.357	181.335		704	69.151
705	90.872	36.761		705	53.193	294.508		705	92.645	308.464		705	114.366	451.779		705	115.252	46.8		705	145.395	51.72		705	167.116	91.777		705	70.038	182.025		705	290.79	567.302		705	116.582	190.962		705	273.059	40.593		705	75.357	180.335		705	69.151
706	90.872	35.449		706	53.193	303.508		706	92.645	313.191		706	114.366	455.593		706	115.252	42.423		706	145.395	52.991		706	167.116	89.517		706	70.038	193.222		706	290.79	560.39		706	116.582	194.985		706	273.059	40.109		706	75.357	186.188		706	69.151
707	90.872	35.888		707	53.193	282.567		707	92.645	319.952		707	114.366	455.089		707	115.252	44.031		707	145.395	50.851		707	167.116	90.223		707	70.038	189.184		707	290.79	561.994		707	116.582	187.73		707	273.059	39.891		707	75.357	186.6		707	69.151
708	90.872	34.649		708	53.193	292.425		708	92.645	311.933		708	114.366	459.132		708	115.252	45.727		708	145.395	52.345		708	167.116	92.029		708	70.038	182.981		708	290.79	560.726		708	116.582	198.384		708	273.059	41.115		708	75.357	185.865		708	69.151
709	90.872	34.015		709	53.193	297.375		709	92.645	314.971		709	114.366	455.341		709	115.252	42.708		709	145.395	50.037		709	167.116	88.862		709	70.038	186.873		709	290.79	558.872		709	116.582	190.487		709	273.059	41.455		709	75.357	181.871		709	69.151
710	90.872	36.693		710	53.193	285.383		710	92.645	313.699		710	114.366	449.961		710	115.252	43.896		710	145.395	51.796		710	167.116	90.141		710	70.038	189.38		710	290.79	561.053		710	116.582	190.065		710	273.059	39.821		710	75.357	182.682		710	69.151
711	90.872	34.98		711	53.193	287.792		711	92.645	310.086		711	114.366	457.756		711	115.252	43.727		711	145.395	51.457		711	167.116	90.265		711	70.038	180.259		711	290.79	559.636		711	116.582	188.106		711	273.059	39.336		711	75.357	178.965		711	69.151
712	90.872	36.898		712	53.193	293.758		712	92.645	315.498		712	114.366	454.872		712	115.252	44.327		712	145.395	49.308		712	167.116	92.008		712	70.038	186.481		712	290.79	559.869		712	116.582	193.798		712	273.059	41.865		712	75.357	188.094		712	69.151
713	90.872	34.693		713	53.193	291.258		713	92.645	317.78		713	114.366	467.039		713	115.252	44.669		713	145.395	53.262		713	167.116	92.369		713	70.038	191.335		713	290.79	565.797		713	116.582	192.274		713	273.059	38.872		713	75.357	184.235		713	69.151
714	90.872	35.829		714	53.193	299.108		714	92.645	305.804		714	114.366	456.05		714	115.252	43.827		714	145.395	49.704		714	167.116	90.324		714	70.038	182.93		714	290.79	564.588		714	116.582	195.141		714	273.059	43.112		714	75.357	183.135		714	69.151
715	90.872	36.215		715	53.193	307.033		715	92.645	302.316		715	114.366	445.101		715	115.252	44.988		715	145.395	52.893		715	167.116	88.419		715	70.038	195.715		715	290.79	572.444		715	116.582	188.422		715	273.059	40.666		715	75.357	186.1		715	69.151
716	90.872	37.429		716	53.193	285.725		716	92.645	304.498		716	114.366	458.353		716	115.252	42.923		716	145.395	52.155		716	167.116	86.117		716	70.038	183.538		716	290.79	561.753		716	116.582	200.544		716	273.059	40.755		716	75.357	182.629		716	69.151
717	90.872	37.42		717	53.193	294.792		717	92.645	311.397		717	114.366	446.023		717	115.252	45.269		717	145.395	52.601		717	167.116	91.401		717	70.038	182.158		717	290.79	562.848		717	116.582	183.795		717	273.059	41.51		717	75.357	176.606		717	69.151
718	90.872	34.907		718	53.193	297.917		718	92.645	304.014		718	114.366	461.058		718	115.252	46.504		718	145.395	53.265		718	167.116	92.851		718	70.038	195.867		718	290.79	564.604		718	116.582	194.076		718	273.059	41.359		718	75.357	183.412		718	69.151
719	90.872	34.42		719	53.193	279.633		719	92.645	297.957		719	114.366	457.279		719	115.252	44.638		719	145.395	55.021		719	167.116	89.212		719	70.038	190.525		719	290.79	560.127		719	116.582	192.715		719	273.059	40.69		719	75.357	176.241		719	69.151
720	90.872	34.859		720	53.193	296.383		720	92.645	288.833		720	114.366	458.453		720	115.252	45.7		720	145.395	55.055		720	167.116	95.045		720	70.038	193.595		720	290.79	559.172		720	116.582	188.882		720	273.059	39.411		720	75.357	175.465		720	69.151
721	90.872	34.468		721	53.193	297.808		721	92.645	300.584		721	114.366	462.508		721	115.252	43.692		721	145.395	52.604		721	167.116	89.345		721	70.038	180.627		721	290.79	554.396		721	116.582	189.243		721	273.059	41.167		721	75.357	179.182		721	69.151
722	90.872	35.517		722	53.193	291.383		722	92.645	302.608		722	114.366	457.422		722	115.252	44.623		722	145.395	51.747		722	167.116	88.366		722	70.038	184.785		722	290.79	548.591		722	116.582	191.274		722	273.059	41.193		722	75.357	174		722	69.151
723	90.872	35.322		723	53.193	286.767		723	92.645	304.517		723	114.366	471.899		723	115.252	46.492		723	145.395	52.851		723	167.116	92.109		723	70.038	184.285		723	290.79	540.369		723	116.582	189.049		723	273.059	40.352		723	75.357	180.994		723	69.151
724	90.872	35.927		724	53.193	282.942		724	92.645	306.096		724	114.366	470.651		724	115.252	44.146		724	145.395	50.485		724	167.116	95.687		724	70.038	186.93		724	290.79	537.756		724	116.582	185.943		724	273.059	40.888		724	75.357	182.6		724	69.151
725	90.872	33.956		725	53.193	293.292		725	92.645	300.478		725	114.366	469.306		725	115.252	45.738		725	145.395	51.915		725	167.116	92.597		725	70.038	190.462		725	290.79	538.279		725	116.582	185.471		725	273.059	41.518		725	75.357	179.853		725	69.151
726	90.872	34.868		726	53.193	291.217		726	92.645	303.273		726	114.366	454.93		726	115.252	46.108		726	145.395	49.674		726	167.116	91.493		726	70.038	193.937		726	290.79	526.201		726	116.582	183.92		726	273.059	40.581		726	75.357	184.176		726	69.151
727	90.872	37.888		727	53.193	298.35		727	92.645	304.545		727	114.366	465.132		727	115.252	45.719		727	145.395	50.912		727	167.116	87.143		727	70.038	178.386		727	290.79	543.372		727	116.582	182.148		727	273.059	39.297		727	75.357	181.206		727	69.151
728	90.872	35.985		728	53.193	295.592		728	92.645	310.612		728	114.366	459.581		728	115.252	45.2		728	145.395	49.216		728	167.116	91.403		728	70.038	187.57		728	290.79	549.768		728	116.582	186.087		728	273.059	38.352		728	75.357	174.888		728	69.151
729	90.872	37.054		729	53.193	293.35		729	92.645	314.45		729	114.366	462.376		729	115.252	45.808		729	145.395	50.244		729	167.116	88.642		729	70.038	190.892		729	290.79	557.029		729	116.582	179.103		729	273.059	39.294		729	75.357	176.912		729	69.151
730	90.872	35.38		730	53.193	300.592		730	92.645	312.665		730	114.366	465.279		730	115.252	47.535		730	145.395	50.052		730	167.116	88.963		730	70.038	189.487		730	290.79	559.62		730	116.582	187.73		730	273.059	39.933		730	75.357	176.424		730	69.151
731	90.872	35.473		731	53.193	292.633		731	92.645	301.182		731	114.366	458.558		731	115.252	44.431		731	145.395	51.82		731	167.116	89.976		731	70.038	184.285		731	290.79	550.991		731	116.582	177.856		731	273.059	40.662		731	75.357	178.394		731	69.151
732	90.872	35.551		732	53.193	296.958		732	92.645	307.569		732	114.366	474.57		732	115.252	47.354		732	145.395	50.802		732	167.116	91.085		732	70.038	191.506		732	290.79	554.05		732	116.582	184.635		732	273.059	40.406		732	75.357	178.294		732	69.151
733	90.872	36.907		733	53.193	298.633		733	92.645	311.722		733	114.366	473.349		733	115.252	47.365		733	145.395	46.585		733	167.116	91.167		733	70.038	183.532		733	290.79	556.017		733	116.582	178.517		733	273.059	39.253		733	75.357	174.635		733	69.151
734	90.872	34.629		734	53.193	283.408		734	92.645	308.89		734	114.366	456.143		734	115.252	43.108		734	145.395	49.957		734	167.116	94.151		734	70.038	200.348		734	290.79	556.192		734	116.582	179.426		734	273.059	40.545		734	75.357	170.965		734	69.151
735	90.872	36.917		735	53.193	293.683		735	92.645	306.55		735	114.366	468.322		735	115.252	46.162		735	145.395	48.939		735	167.116	87.976		735	70.038	189.487		735	290.79	548.505		735	116.582	182.129		735	273.059	41.094		735	75.357	176.871		735	69.151
736	90.872	34.922		736	53.193	297.475		736	92.645	308.684		736	114.366	460.926		736	115.252	48.362		736	145.395	46.997		736	167.116	90.979		736	70.038	185.525		736	290.79	545.875		736	116.582	178.156		736	273.059	41.295		736	75.357	173.276		736	69.151
737	90.872	35.278		737	53.193	288.658		737	92.645	300.411		737	114.366	460.198		737	115.252	44.738		737	145.395	51.131		737	167.116	87.581		737	70.038	182.297		737	290.79	558.346		737	116.582	174.947		737	273.059	39.864		737	75.357	172.129		737	69.151
738	90.872	36.054		738	53.193	291.225		738	92.645	307.833		738	114.366	450.399		738	115.252	46.177		738	145.395	48.637		738	167.116	92.313		738	70.038	182.848		738	290.79	555.29		738	116.582	174.008		738	273.059	38.407		738	75.357	171.529		738	69.151
739	90.872	35.82		739	53.193	295.425		739	92.645	304.627		739	114.366	462.919		739	115.252	46.762		739	145.395	49.165		739	167.116	88.271		739	70.038	181.829		739	290.79	550.271		739	116.582	167.369		739	273.059	41.974		739	75.357	169.188		739	69.151
740	90.872	35.727		740	53.193	283.783		740	92.645	297.627		740	114.366	454.186		740	115.252	45.904		740	145.395	49.674		740	167.116	87.271		740	70.038	183.209		740	290.79	553.656		740	116.582	178.51		740	273.059	39.373		740	75.357	182.553		740	69.151
741	90.872	35.859		741	53.193	298.792		741	92.645	312.349		741	114.366	451.364		741	115.252	43.212		741	145.395	48.152		741	167.116	89.706		741	70.038	187.658		741	290.79	547.344		741	116.582	170.84		741	273.059	39.878		741	75.357	178.306		741	69.151
742	90.872	37.054		742	53.193	294.25		742	92.645	288.555		742	114.366	459.829		742	115.252	45.242		742	145.395	49.534		742	167.116	92.379		742	70.038	193.797		742	290.79	548.285		742	116.582	167.365		742	273.059	40.104		742	75.357	170.976		742	69.151
743	90.872	35.898		743	53.193	275.608		743	92.645	308.799		743	114.366	441.446		743	115.252	47.508		743	145.395	50.07		743	167.116	91.432		743	70.038	175.342		743	290.79	548.549		743	116.582	175.346		743	273.059	40.164		743	75.357	168.012		743	69.151
744	90.872	36.951		744	53.193	284.8		744	92.645	306.249		744	114.366	451.64		744	115.252	44.635		744	145.395	49.387		744	167.116	95.767		744	70.038	181.804		744	290.79	550.683		744	116.582	166.51		744	273.059	38.174		744	75.357	176.018		744	69.151
745	90.872	36.298		745	53.193	296.375		745	92.645	300.67		745	114.366	451.57		745	115.252	44.831		745	145.395	47.845		745	167.116	92.271		745	70.038	179.38		745	290.79	551.174		745	116.582	172.171		745	273.059	39.435		745	75.357	175.035		745	69.151
746	90.872	34.151		746	53.193	293		746	92.645	297.043		746	114.366	437.221		746	115.252	46.746		746	145.395	49.814		746	167.116	90.013		746	70.038	188.519		746	290.79	549.355		746	116.582	171.612		746	273.059	39.703		746	75.357	174.335		746	69.151
747	90.872	37.961		747	53.193	281.983		747	92.645	296.158		747	114.366	448.57		747	115.252	44.742		747	145.395	49.296		747	167.116	93.496		747	70.038	184.994		747	290.79	545.341		747	116.582	166.251		747	273.059	39.67		747	75.357	175.653		747	69.151
748	90.872	34.454		748	53.193	282.842		748	92.645	298.933		748	114.366	425.795		748	115.252	43.2		748	145.395	48.954		748	167.116	90.127		748	70.038	184.43		748	290.79	554.128		748	116.582	161.407		748	273.059	38.235		748	75.357	183.665		748	69.151
749	90.872	36.073		749	53.193	278.983		749	92.645	303.306		749	114.366	416.171		749	115.252	44.885		749	145.395	51.634		749	167.116	88.369		749	70.038	181.949		749	290.79	552.965		749	116.582	167.209		749	273.059	41.174		749	75.357	173.912		749	69.151
750	90.872	35.673		750	53.193	280.417		750	92.645	293.876		750	114.366	404.469		750	115.252	46.442		750	145.395	49.607		750	167.116	87.464		750	70.038	180.095		750	290.79	550.555		750	116.582	167.684		750	273.059	38.906		750	75.357	175.5		750	69.151
751	90.872	35.312		751	53.193	293.033		751	92.645	295.56		751	114.366	395.376		751	115.252	44.877		751	145.395	48.851		751	167.116	88.955		751	70.038	178.93		751	290.79	555.422		751	116.582	166.319		751	273.059	39.969		751	75.357	175.865		751	69.151
752	90.872	35.951		752	53.193	296.133		752	92.645	297.148		752	114.366	426.287		752	115.252	45.338		752	145.395	50.107		752	167.116	85.483		752	70.038	178.892		752	290.79	551.846		752	116.582	171.521		752	273.059	38.584		752	75.357	176.112		752	69.151
753	90.872	36.634		753	53.193	283		753	92.645	289.115		753	114.366	419.438		753	115.252	46.173		753	145.395	48.061		753	167.116	90.143		753	70.038	183.867		753	290.79	547.334		753	116.582	161.787		753	273.059	39.07		753	75.357	167.871		753	69.151
754	90.872	33.966		754	53.193	289.117		754	92.645	286.842		754	114.366	440.097		754	115.252	45.431		754	145.395	50.107		754	167.116	87.019		754	70.038	184.886		754	290.79	552.977		754	116.582	166.403		754	273.059	38.86		754	75.357	179.7		754	69.151
755	90.872	35.585		755	53.193	295.575		755	92.645	283.292		755	114.366	436.054		755	115.252	45.381		755	145.395	46.924		755	167.116	89.615		755	70.038	186.968		755	290.79	544.29		755	116.582	164.943		755	273.059	40.75		755	75.357	178.841		755	69.151
756	90.872	35.015		756	53.193	299.075		756	92.645	290.177		756	114.366	446.965		756	115.252	45.358		756	145.395	52.323		756	167.116	89.347		756	70.038	181.443		756	290.79	536.466		756	116.582	163.023		756	273.059	40.622		756	75.357	183.353		756	69.151
757	90.872	36.137		757	53.193	281.583		757	92.645	292.014		757	114.366	448.942		757	115.252	42.462		757	145.395	49.442		757	167.116	90.077		757	70.038	190.81		757	290.79	541.662		757	116.582	160.532		757	273.059	41.727		757	75.357	174.665		757	69.151
758	90.872	35.195		758	53.193	297.633		758	92.645	287.306		758	114.366	445.659		758	115.252	43.65		758	145.395	48.195		758	167.116	88.069		758	70.038	190.962		758	290.79	538.881		758	116.582	169.745		758	273.059	41.232		758	75.357	176.406		758	69.151
759	90.872	34.429		759	53.193	288.108		759	92.645	282.627		759	114.366	446.733		759	115.252	45.923		759	145.395	48.143		759	167.116	87.926		759	70.038	191.272		759	290.79	545.59		759	116.582	161.437		759	273.059	40.375		759	75.357	176.935		759	69.151
760	90.872	35.107		760	53.193	307.583		760	92.645	291.378		760	114.366	446.787		760	115.252	46.173		760	145.395	47.988		760	167.116	90.199		760	70.038	180.234		760	290.79	548.982		760	116.582	157.506		760	273.059	40.149		760	75.357	172.188		760	69.151
761	90.872	35.6		761	53.193	294.575		761	92.645	279.091		761	114.366	454.926		761	115.252	45.208		761	145.395	48.677		761	167.116	87.944		761	70.038	196.127		761	290.79	541.951		761	116.582	158.966		761	273.059	39.364		761	75.357	178.947		761	69.151
762	90.872	36.2		762	53.193	284.492		762	92.645	275.196		762	114.366	448.554		762	115.252	45.919		762	145.395	52.101		762	167.116	89.594		762	70.038	186.348		762	290.79	538.849		762	116.582	163.475		762	273.059	41.222		762	75.357	174.024		762	69.151
763	90.872	34.527		763	53.193	293.558		763	92.645	279.191		763	114.366	453.202		763	115.252	45.773		763	145.395	48.963		763	167.116	90.082		763	70.038	184.582		763	290.79	546.784		763	116.582	163.665		763	273.059	42.333		763	75.357	172.953		763	69.151
764	90.872	35.859		764	53.193	304.325		764	92.645	288.828		764	114.366	443.609		764	115.252	43.504		764	145.395	49.616		764	167.116	90.928		764	70.038	182.253		764	290.79	552.561		764	116.582	154.973		764	273.059	42.682		764	75.357	178.882		764	69.151
765	90.872	34.278		765	53.193	290.858		765	92.645	279.761		765	114.366	443.81		765	115.252	45.415		765	145.395	47.771		765	167.116	88.294		765	70.038	184.608		765	290.79	547.518		765	116.582	158.966		765	273.059	39.433		765	75.357	184.553		765	69.151
766	90.872	33.38		766	53.193	313.217		766	92.645	264.297		766	114.366	447.236		766	115.252	43.988		766	145.395	45.973		766	167.116	90.955		766	70.038	185		766	290.79	547.372		766	116.582	159.639		766	273.059	41.735		766	75.357	180.476		766	69.151
767	90.872	35.59		767	53.193	301.292		767	92.645	270.517		767	114.366	449.957		767	115.252	45.577		767	145.395	49.68		767	167.116	92.021		767	70.038	185.981		767	290.79	541.808		767	116.582	160.053		767	273.059	39.869		767	75.357	171.665		767	69.151
768	90.872	35.449		768	53.193	284.242		768	92.645	284.029		768	114.366	452.477		768	115.252	43.442		768	145.395	48.027		768	167.116	88.825		768	70.038	181.044		768	290.79	548.656		768	116.582	160.681		768	273.059	41.055		768	75.357	181.5		768	69.151
769	90.872	36.156		769	53.193	297		769	92.645	269.024		769	114.366	445.891		769	115.252	44.777		769	145.395	50.277		769	167.116	93.037		769	70.038	180.525		769	290.79	550.255		769	116.582	157.779		769	273.059	40.195		769	75.357	173.976		769	69.151
770	90.872	34.956		770	53.193	296.658		770	92.645	276.89		770	114.366	440.477		770	115.252	46.631		770	145.395	50.765		770	167.116	93.684		770	70.038	185.627		770	290.79	543.21		770	116.582	167.16		770	273.059	39.01		770	75.357	175.359		770	69.151
771	90.872	35.249		771	53.193	295.175		771	92.645	292.799		771	114.366	438.035		771	115.252	45.838		771	145.395	48.692		771	167.116	91.889		771	70.038	179.127		771	290.79	547.788		771	116.582	164.365		771	273.059	38.95		771	75.357	182.241		771	69.151
772	90.872	36.615		772	53.193	292.7		772	92.645	278.416		772	114.366	439.399		772	115.252	44.746		772	145.395	49.223		772	167.116	90.525		772	70.038	183.215		772	290.79	544.921		772	116.582	160.821		772	273.059	39.369		772	75.357	179.153		772	69.151
773	90.872	35.385		773	53.193	310.783		773	92.645	273.531		773	114.366	438.085		773	115.252	48.062		773	145.395	48.335		773	167.116	91.939		773	70.038	180.335		773	290.79	539.665		773	116.582	162.456		773	273.059	39.209		773	75.357	171.435		773	69.151
774	90.872	34.61		774	53.193	315.633		774	92.645	283.005		774	114.366	437.202		774	115.252	44.092		774	145.395	48.433		774	167.116	94.57		774	70.038	179.405		774	290.79	539.582		774	116.582	161.825		774	273.059	39.456		774	75.357	183.5		774	69.151
775	90.872	36.766		775	53.193	288.2		775	92.645	287.368		775	114.366	439.694		775	115.252	46.119		775	145.395	48.979		775	167.116	92.019		775	70.038	188.025		775	290.79	543.483		775	116.582	161.498		775	273.059	39.224		775	75.357	175.812		775	69.151
776	90.872	34.551		776	53.193	291.842		776	92.645	278.445		776	114.366	443.035		776	115.252	46.858		776	145.395	50.418		776	167.116	90.7		776	70.038	189.329		776	290.79	534.3		776	116.582	165.061		776	273.059	38.144		776	75.357	171.588		776	69.151
777	90.872	35.615		777	53.193	302.458		777	92.645	280.225		777	114.366	446.329		777	115.252	43.942		777	145.395	48.442		777	167.116	91.345		777	70.038	187.297		777	290.79	547.759		777	116.582	166.768		777	273.059	38.235		777	75.357	175.671		777	69.151
778	90.872	36.054		778	53.193	298.167		778	92.645	276.201		778	114.366	436.585		778	115.252	47.062		778	145.395	51.259		778	167.116	89.18		778	70.038	186.551		778	290.79	539.066		778	116.582	159.316		778	273.059	38.419		778	75.357	181.271		778	69.151
779	90.872	34.737		779	53.193	299.833		779	92.645	286.129		779	114.366	423.229		779	115.252	44.538		779	145.395	52.503		779	167.116	90.525		779	70.038	188.07		779	290.79	544.605		779	116.582	163.3		779	273.059	39.187		779	75.357	170.918		779	69.151
780	90.872	35.151		780	53.193	279.833		780	92.645	271.201		780	114.366	436.124		780	115.252	45.223		780	145.395	52.198		780	167.116	94.525		780	70.038	189.449		780	290.79	542.248		780	116.582	166.73		780	273.059	39.37		780	75.357	177.224		780	69.151
781	90.872	32.966		781	53.193	289.683		781	92.645	266.627		781	114.366	433.953		781	115.252	45.642		781	145.395	50.473		781	167.116	94.167		781	70.038	185.981		781	290.79	542.736		781	116.582	165.456		781	273.059	38.256		781	75.357	182.4		781	69.151
782	90.872	34.6		782	53.193	286.208		782	92.645	273.967		782	114.366	440.55		782	115.252	45.869		782	145.395	51.997		782	167.116	89.889		782	70.038	183.228		782	290.79	538.55		782	116.582	164.829		782	273.059	40.023		782	75.357	175.918		782	69.151
783	90.872	34.541		783	53.193	294.275		783	92.645	279.804		783	114.366	427.081		783	115.252	42.765		783	145.395	50.966		783	167.116	94.493		783	70.038	178.222		783	290.79	534.646		783	116.582	159.483		783	273.059	38.86		783	75.357	171.435		783	69.151
784	90.872	36.795		784	53.193	282.95		784	92.645	278.943		784	114.366	439.616		784	115.252	44.885		784	145.395	51.677		784	167.116	96.371		784	70.038	186.804		784	290.79	540.017		784	116.582	167.856		784	273.059	39.901		784	75.357	169.059		784	69.151
785	90.872	33.659		785	53.193	295.933		785	92.645	278.359		785	114.366	449.496		785	115.252	46.546		785	145.395	49.997		785	167.116	92.448		785	70.038	186.165		785	290.79	540.256		785	116.582	170.844		785	273.059	38.503		785	75.357	179.388		785	69.151
786	90.872	34.634		786	53.193	291.675		786	92.645	269.569		786	114.366	430.287		786	115.252	44.654		786	145.395	49.628		786	167.116	93.268		786	70.038	179.494		786	290.79	539.137		786	116.582	169.616		786	273.059	41.705		786	75.357	178.765		786	69.151
787	90.872	35.093		787	53.193	292.025		787	92.645	276.952		787	114.366	432.174		787	115.252	45.192		787	145.395	49.335		787	167.116	95.849		787	70.038	187.386		787	290.79	538.619		787	116.582	173.947		787	273.059	40.117		787	75.357	172.806		787	69.151
788	90.872	33		788	53.193	289.483		788	92.645	269.967		788	114.366	432.202		788	115.252	45.831		788	145.395	50.314		788	167.116	91.91		788	70.038	176.063		788	290.79	535.957		788	116.582	166.213		788	273.059	41.076		788	75.357	172.647		788	69.151
789	90.872	33.951		789	53.193	291.517		789	92.645	271.67		789	114.366	434.217		789	115.252	41.869		789	145.395	51.302		789	167.116	94.517		789	70.038	171.297		789	290.79	544.062		789	116.582	170.62		789	273.059	37.945		789	75.357	172.247		789	69.151
790	90.872	35.044		790	53.193	293.225		790	92.645	265.469		790	114.366	441.767		790	115.252	42.469		790	145.395	51.357		790	167.116	89.141		790	70.038	166.671		790	290.79	545.566		790	116.582	164.886		790	273.059	37.981		790	75.357	168.824		790	69.151
791	90.872	36.205		791	53.193	276.633		791	92.645	268.78		791	114.366	438.86		791	115.252	43.942		791	145.395	49.86		791	167.116	92.032		791	70.038	172.905		791	290.79	540.84		791	116.582	165.186		791	273.059	40.019		791	75.357	169.235		791	69.151
792	90.872	32.741		792	53.193	281.8		792	92.645	264.55		792	114.366	435.876		792	115.252	43.242		792	145.395	47.686		792	167.116	93.196		792	70.038	173.854		792	290.79	532.581		792	116.582	172.388		792	273.059	39		792	75.357	182.659		792	69.151
793	90.872	35.854		793	53.193	297.867		793	92.645	256.148		793	114.366	442.5		793	115.252	45.781		793	145.395	49.829		793	167.116	88.151		793	70.038	166.861		793	290.79	535.627		793	116.582	167.529		793	273.059	39.463		793	75.357	171.624		793	69.151
794	90.872	34.249		794	53.193	288.225		794	92.645	265.1		794	114.366	434.636		794	115.252	40.919		794	145.395	52.463		794	167.116	89.634		794	70.038	170.133		794	290.79	538.175		794	116.582	162.141		794	273.059	41.411		794	75.357	176.712		794	69.151
795	90.872	35.478		795	53.193	282.517		795	92.645	266.043		795	114.366	430.198		795	115.252	44.912		795	145.395	50.729		795	167.116	84.109		795	70.038	170.234		795	290.79	529.031		795	116.582	165.616		795	273.059	39.907		795	75.357	180.871		795	69.151
796	90.872	36.024		796	53.193	288.508		796	92.645	270.818		796	114.366	436.562		796	115.252	45.1		796	145.395	49.622		796	167.116	87.316		796	70.038	156.411		796	290.79	542.701		796	116.582	155.27		796	273.059	41.899		796	75.357	176.524		796	69.151
797	90.872	35.576		797	53.193	296.458		797	92.645	258.837		797	114.366	440.004		797	115.252	45.431		797	145.395	51.994		797	167.116	88.228		797	70.038	156.291		797	290.79	541.024		797	116.582	156.555		797	273.059	40.13		797	75.357	171.6		797	69.151
798	90.872	33.015		798	53.193	287.458		798	92.645	262.33		798	114.366	431.845		798	115.252	45.15		798	145.395	51.747		798	167.116	87.536		798	70.038	163.994		798	290.79	530.806		798	116.582	164.43		798	273.059	38.567		798	75.357	180.065		798	69.151
799	90.872	34.517		799	53.193	274.433		799	92.645	256.89		799	114.366	442.628		799	115.252	43.827		799	145.395	51.573		799	167.116	85.886		799	70.038	158.468		799	290.79	535.328		799	116.582	161.696		799	273.059	39.109		799	75.357	175.459		799	69.151
800	90.872	34.19		800	53.193	285.9		800	92.645	260.258		800	114.366	447.298		800	115.252	45.662		800	145.395	47.924		800	167.116	84.926		800	70.038	164.835		800	290.79	541.782		800	116.582	156.24		800	273.059	39.86		800	75.357	173.841		800	69.151
801	90.872	35.639		801	53.193	275.792		801	92.645	257.933		801	114.366	437.864		801	115.252	45.781		801	145.395	51.631		801	167.116	91		801	70.038	160.658		801	290.79	530.939		801	116.582	162.464		801	273.059	38.791		801	75.357	167.676		801	69.151
802	90.872	34.707		802	53.193	271.725		802	92.645	267.833		802	114.366	426.899		802	115.252	44.942		802	145.395	50.067		802	167.116	90.523		802	70.038	162.608		802	290.79	537.123		802	116.582	158.597		802	273.059	40.92		802	75.357	170.329		802	69.151
803	90.872	32.483		803	53.193	284.625		803	92.645	264.732		803	114.366	434.911		803	115.252	43.373		803	145.395	50.134		803	167.116	88.08		803	70.038	164.899		803	290.79	539.023		803	116.582	159.81		803	273.059	40.143		803	75.357	171.747		803	69.151
804	90.872	33.698		804	53.193	287.658		804	92.645	268.981		804	114.366	432.531		804	115.252	47.212		804	145.395	50.924		804	167.116	91.345		804	70.038	161.266		804	290.79	540.319		804	116.582	160.544		804	273.059	39.653		804	75.357	176.153		804	69.151
805	90.872	33.717		805	53.193	275.05		805	92.645	258.129		805	114.366	436.372		805	115.252	43.992		805	145.395	51.921		805	167.116	89.382		805	70.038	156.778		805	290.79	539.576		805	116.582	164.764		805	273.059	40.216		805	75.357	168.482		805	69.151
806	90.872	34.585		806	53.193	283.5		806	92.645	267.163		806	114.366	434.167		806	115.252	44.923		806	145.395	50.387		806	167.116	89.828		806	70.038	158.095		806	290.79	523.873		806	116.582	163.061		806	273.059	37.992		806	75.357	172.412		806	69.151
807	90.872	35.029		807	53.193	294.408		807	92.645	258.201		807	114.366	430.624		807	115.252	44.542		807	145.395	48.93		807	167.116	88.793		807	70.038	157.12		807	290.79	526.369		807	116.582	162.042		807	273.059	39.268		807	75.357	162.076		807	69.151
808	90.872	34		808	53.193	284.408		808	92.645	266.459		808	114.366	435.457		808	115.252	44.419		808	145.395	50.491		808	167.116	89.782		808	70.038	161.525		808	290.79	532.505		808	116.582	152.144		808	273.059	38.474		808	75.357	174.112		808	69.151
809	90.872	34.532		809	53.193	291.042		809	92.645	266.407		809	114.366	436.721		809	115.252	43.631		809	145.395	51.524		809	167.116	88.621		809	70.038	164.038		809	290.79	530.587		809	116.582	164.783		809	273.059	39.208		809	75.357	168.153		809	69.151
810	90.872	34.176		810	53.193	283.25		810	92.645	259.651		810	114.366	443.554		810	115.252	44.535		810	145.395	51.079		810	167.116	92.109		810	70.038	156.918		810	290.79	534.245		810	116.582	170.046		810	273.059	37.804		810	75.357	168.441		810	69.151
811	90.872	34.454		811	53.193	288.567		811	92.645	259.823		811	114.366	439.434		811	115.252	41.854		811	145.395	51.399		811	167.116	92.546		811	70.038	159.43		811	290.79	533.188		811	116.582	165.703		811	273.059	38.974		811	75.357	171.653		811	69.151
812	90.872	34.712		812	53.193	292.475		812	92.645	253.603		812	114.366	431.198		812	115.252	43.981		812	145.395	51.357		812	167.116	92.005		812	70.038	156.918		812	290.79	530.79		812	116.582	165.684		812	273.059	38.148		812	75.357	168.659		812	69.151
813	90.872	35.346		813	53.193	288.05		813	92.645	257.943		813	114.366	436.884		813	115.252	42.196		813	145.395	49.659		813	167.116	90.973		813	70.038	165.386		813	290.79	530.602		813	116.582	161.232		813	273.059	40.263		813	75.357	179.641		813	69.151
814	90.872	33.424		814	53.193	284.667		814	92.645	247.641		814	114.366	446.453		814	115.252	44.904		814	145.395	50.326		814	167.116	93.531		814	70.038	160.899		814	290.79	528.398		814	116.582	172.783		814	273.059	40.31		814	75.357	175.494		814	69.151
815	90.872	35.239		815	53.193	299.208		815	92.645	255.062		815	114.366	425.438		815	115.252	44.208		815	145.395	49.396		815	167.116	87.154		815	70.038	156.538		815	290.79	528.425		815	116.582	163.859		815	273.059	39.214		815	75.357	170.894		815	69.151
816	90.872	34.429		816	53.193	286.583		816	92.645	254.703		816	114.366	444.837		816	115.252	42.885		816	145.395	48.768		816	167.116	88.698		816	70.038	164.146		816	290.79	538.718		816	116.582	161.665		816	273.059	38.349		816	75.357	168.635		816	69.151
817	90.872	33.966		817	53.193	272.4		817	92.645	247.478		817	114.366	431.554		817	115.252	45.985		817	145.395	51.284		817	167.116	85.074		817	70.038	157.962		817	290.79	539.088		817	116.582	160.213		817	273.059	37.966		817	75.357	178.971		817	69.151
818	90.872	32.824		818	53.193	283.8		818	92.645	246.986		818	114.366	423.287		818	115.252	43.323		818	145.395	48.677		818	167.116	89.562		818	70.038	161.209		818	290.79	534.471		818	116.582	172.951		818	273.059	40.206		818	75.357	171.935		818	69.151
819	90.872	34.82		819	53.193	288.9		819	92.645	251.622		819	114.366	419.81		819	115.252	44.296		819	145.395	49.881		819	167.116	91.653		819	70.038	152.234		819	290.79	534.541		819	116.582	165.54		819	273.059	39.174		819	75.357	179.806		819	69.151
820	90.872	35.244		820	53.193	291.808		820	92.645	245.694		820	114.366	426.384		820	115.252	46.6		820	145.395	49.521		820	167.116	91.175		820	70.038	158.658		820	290.79	525.639		820	116.582	166.764		820	273.059	39.032		820	75.357	175.876		820	69.151
821	90.872	35.366		821	53.193	281.867		821	92.645	251.766		821	114.366	428.349		821	115.252	45.569		821	145.395	47.229		821	167.116	90.568		821	70.038	161.038		821	290.79	532.989		821	116.582	164.605		821	273.059	39.695		821	75.357	168.888		821	69.151
822	90.872	34.698		822	53.193	286.55		822	92.645	258.474		822	114.366	426.233		822	115.252	45.977		822	145.395	46.777		822	167.116	88.074		822	70.038	153.772		822	290.79	526.527		822	116.582	168.163		822	273.059	38.731		822	75.357	172.9		822	69.151
823	90.872	35.893		823	53.193	288.183		823	92.645	255.416		823	114.366	429.36		823	115.252	43.854		823	145.395	48.098		823	167.116	91.149		823	70.038	163.057		823	290.79	524.781		823	116.582	169.433		823	273.059	41.609		823	75.357	176.647		823	69.151
824	90.872	34.107		824	53.193	287.6		824	92.645	253.411		824	114.366	427.376		824	115.252	44.431		824	145.395	48.674		824	167.116	90.515		824	70.038	160.595		824	290.79	516.956		824	116.582	168.388		824	273.059	39.304		824	75.357	172.329		824	69.151
825	90.872	35.512		825	53.193	280.417		825	92.645	252.919		825	114.366	429.043		825	115.252	44.138		825	145.395	49.015		825	167.116	83.581		825	70.038	154.677		825	290.79	524.276		825	116.582	168.023		825	273.059	39.403		825	75.357	176.153		825	69.151
826	90.872	34.815		826	53.193	280.225		826	92.645	258.234		826	114.366	425.802		826	115.252	43.854		826	145.395	48.774		826	167.116	91.902		826	70.038	161.722		826	290.79	513.503		826	116.582	172.696		826	273.059	40.644		826	75.357	180.882		826	69.151
827	90.872	34.639		827	53.193	287.275		827	92.645	252.249		827	114.366	435.391		827	115.252	45.931		827	145.395	46.692		827	167.116	88.456		827	70.038	158.886		827	290.79	521.561		827	116.582	172.719		827	273.059	38.852		827	75.357	179.141		827	69.151
828	90.872	36.537		828	53.193	283.008		828	92.645	260.689		828	114.366	422.419		828	115.252	44.877		828	145.395	48.738		828	167.116	94.088		828	70.038	161.335		828	290.79	524.143		828	116.582	172.327		828	273.059	40.169		828	75.357	179.676		828	69.151
829	90.872	35.044		829	53.193	278.292		829	92.645	254.402		829	114.366	437.973		829	115.252	43.55		829	145.395	47.905		829	167.116	92.544		829	70.038	160.032		829	290.79	517.037		829	116.582	168.198		829	273.059	39.14		829	75.357	169.935		829	69.151
830	90.872	34.215		830	53.193	284.492		830	92.645	260.627		830	114.366	422.229		830	115.252	44.75		830	145.395	49.418		830	167.116	89.533		830	70.038	161.165		830	290.79	507.015		830	116.582	160.886		830	273.059	38.933		830	75.357	177.506		830	69.151
831	90.872	34.449		831	53.193	275.717		831	92.645	254.995		831	114.366	431.895		831	115.252	44.188		831	145.395	49.927		831	167.116	92.634		831	70.038	164.772		831	290.79	518.63		831	116.582	172.563		831	273.059	40.172		831	75.357	174.335		831	69.151
832	90.872	33.907		832	53.193	268.883		832	92.645	254.45		832	114.366	427.512		832	115.252	45.138		832	145.395	46.61		832	167.116	90.602		832	70.038	161.184		832	290.79	515.12		832	116.582	168.456		832	273.059	41.019		832	75.357	173.2		832	69.151
833	90.872	35.063		833	53.193	274.817		833	92.645	264.617		833	114.366	425.942		833	115.252	41.788		833	145.395	50.585		833	167.116	91.828		833	70.038	157.449		833	290.79	520.364		833	116.582	168.821		833	273.059	38.765		833	75.357	173.1		833	69.151
834	90.872	33.444		834	53.193	283.833		834	92.645	262.766		834	114.366	426.531		834	115.252	45.127		834	145.395	49.497		834	167.116	94.13		834	70.038	166.19		834	290.79	528.902		834	116.582	169.886		834	273.059	39.766		834	75.357	180.706		834	69.151
835	90.872	33.034		835	53.193	279.542		835	92.645	261.756		835	114.366	430.314		835	115.252	44.446		835	145.395	49.165		835	167.116	93.912		835	70.038	161.342		835	290.79	517.287		835	116.582	168.163		835	273.059	39.615		835	75.357	183.506		835	69.151
836	90.872	35.137		836	53.193	287.317		836	92.645	272.033		836	114.366	428.116		836	115.252	42.423		836	145.395	51.845		836	167.116	89.833		836	70.038	166.209		836	290.79	511.649		836	116.582	165.837		836	273.059	39.018		836	75.357	175.247		836	69.151
837	90.872	34.42		837	53.193	281.092		837	92.645	276.225		837	114.366	428.736		837	115.252	44.138		837	145.395	48.707		837	167.116	88.907		837	70.038	159.101		837	290.79	512.354		837	116.582	172.099		837	273.059	38.711		837	75.357	175.259		837	69.151
838	90.872	33.946		838	53.193	281.442		838	92.645	263.321		838	114.366	423.535		838	115.252	44.746		838	145.395	48.454		838	167.116	91.703		838	70.038	159.329		838	290.79	516.122		838	116.582	167.118		838	273.059	38.628		838	75.357	167.382		838	69.151
839	90.872	34.307		839	53.193	276.517		839	92.645	269.445		839	114.366	425.295		839	115.252	45.862		839	145.395	47.53		839	167.116	88.164		839	70.038	170.937		839	290.79	522.596		839	116.582	172.612		839	273.059	41.032		839	75.357	173.312		839	69.151
840	90.872	34.18		840	53.193	266.483		840	92.645	263.78		840	114.366	420.388		840	115.252	43.719		840	145.395	47.845		840	167.116	92.931		840	70.038	167.063		840	290.79	518.805		840	116.582	173.323		840	273.059	39.758		840	75.357	175.865		840	69.151
841	90.872	33.971		841	53.193	281.45		841	92.645	264.622		841	114.366	422.45		841	115.252	43.15		841	145.395	48.143		841	167.116	91.143		841	70.038	166.127		841	290.79	517.934		841	116.582	165.905		841	273.059	37.956		841	75.357	176.312		841	69.151
842	90.872	35.298		842	53.193	291.242		842	92.645	267.22		842	114.366	427.062		842	115.252	42.919		842	145.395	48.518		842	167.116	92.265		842	70.038	163.576		842	290.79	524.63		842	116.582	169.601		842	273.059	39.052		842	75.357	174.147		842	69.151
843	90.872	34.449		843	53.193	276.75		843	92.645	258.464		843	114.366	426.76		843	115.252	43.723		843	145.395	48.814		843	167.116	88.225		843	70.038	169.367		843	290.79	511.913		843	116.582	170.278		843	273.059	39.369		843	75.357	178.306		843	69.151
844	90.872	34.249		844	53.193	276.217		844	92.645	262.737		844	114.366	420.233		844	115.252	41.169		844	145.395	48.049		844	167.116	91.472		844	70.038	165.209		844	290.79	525.809		844	116.582	171.027		844	273.059	39.742		844	75.357	179.076		844	69.151
845	90.872	32.483		845	53.193	286.658		845	92.645	269.976		845	114.366	413.589		845	115.252	46.046		845	145.395	50.076		845	167.116	90.318		845	70.038	163.342		845	290.79	518.998		845	116.582	174.091		845	273.059	38.843		845	75.357	175.635		845	69.151
846	90.872	34.722		846	53.193	283.35		846	92.645	257.828		846	114.366	417.609		846	115.252	44.731		846	145.395	48.399		846	167.116	91.499		846	70.038	171.658		846	290.79	517.189		846	116.582	169.608		846	273.059	39.206		846	75.357	181.7		846	69.151
847	90.872	37.039		847	53.193	273.075		847	92.645	265.847		847	114.366	414.058		847	115.252	43.75		847	145.395	48.854		847	167.116	89.533		847	70.038	166.361		847	290.79	527.334		847	116.582	170.776		847	273.059	40.732		847	75.357	171.241		847	69.151
848	90.872	33.473		848	53.193	273.025		848	92.645	259.799		848	114.366	416.074		848	115.252	44.096		848	145.395	48.259		848	167.116	90.186		848	70.038	171		848	290.79	506.468		848	116.582	161.156		848	273.059	39.164		848	75.357	171.353		848	69.151
849	90.872	34.761		849	53.193	278.342		849	92.645	256.12		849	114.366	426.221		849	115.252	43.665		849	145.395	46.311		849	167.116	91.443		849	70.038	164.924		849	290.79	508.434		849	116.582	166.046		849	273.059	40.153		849	75.357	170.206		849	69.151
850	90.872	35.849		850	53.193	279.883		850	92.645	265.072		850	114.366	419.155		850	115.252	42.108		850	145.395	46.845		850	167.116	89.748		850	70.038	165.165		850	290.79	507.053		850	116.582	179.35		850	273.059	39.17		850	75.357	171.653		850	69.151
851	90.872	34.161		851	53.193	277.317		851	92.645	257.761		851	114.366	419.012		851	115.252	45.088		851	145.395	48.247		851	167.116	86.719		851	70.038	162.987		851	290.79	508.405		851	116.582	172.54		851	273.059	39.909		851	75.357	170.635		851	69.151
852	90.872	34.956		852	53.193	277.517		852	92.645	269.498		852	114.366	422.93		852	115.252	41.708		852	145.395	58.72		852	167.116	94.655		852	70.038	163.937		852	290.79	515.809		852	116.582	167.928		852	273.059	39.411		852	75.357	172.988		852	69.151
853	90.872	35.995		853	53.193	280.725		853	92.645	266.679		853	114.366	425.318		853	115.252	44.35		853	145.395	56.232		853	167.116	93.753		853	70.038	171.753		853	290.79	514.305		853	116.582	171.046		853	273.059	39.558		853	75.357	165.941		853	69.151
854	90.872	34.107		854	53.193	283.458		854	92.645	260.029		854	114.366	410.965		854	115.252	43.55		854	145.395	40.57		854	167.116	89.491		854	70.038	174.962		854	290.79	523.344		854	116.582	165.08		854	273.059	39.685		854	75.357	169.7		854	69.151
855	90.872	36.493		855	53.193	281.375		855	92.645	263.718		855	114.366	422.151		855	115.252	42.738		855	145.395	38.463		855	167.116	92.406		855	70.038	169.437		855	290.79	528.156		855	116.582	168.867		855	273.059	39.159		855	75.357	166.388		855	69.151
856	90.872	36.127		856	53.193	296.825		856	92.645	260.464		856	114.366	420.07		856	115.252	44.869		856	145.395	47.588		856	167.116	93.721		856	70.038	175.905		856	290.79	531.259		856	116.582	169.57		856	273.059	39.498		856	75.357	169.029		856	69.151
857	90.872	35.005		857	53.193	274.25		857	92.645	260.813		857	114.366	428.198		857	115.252	42.973		857	145.395	47.055		857	167.116	92.859		857	70.038	169.063		857	290.79	523.094		857	116.582	161.848		857	273.059	39.666		857	75.357	171.806		857	69.151
858	90.872	35.59		858	53.193	278.467		858	92.645	263.105		858	114.366	419.539		858	115.252	45.015		858	145.395	41.704		858	167.116	92.727		858	70.038	171.741		858	290.79	522.713		858	116.582	168.779		858	273.059	40.968		858	75.357	167.671		858	69.151
859	90.872	35.78		859	53.193	264.392		859	92.645	257.096		859	114.366	421.155		859	115.252	42.942		859	145.395	47.268		859	167.116	92.804		859	70.038	174.81		859	290.79	529.7		859	116.582	172.563		859	273.059	39.989		859	75.357	169.194		859	69.151
860	90.872	35.22		860	53.193	287.708		860	92.645	266.569		860	114.366	422.938		860	115.252	44.938		860	145.395	51.238		860	167.116	87.883		860	70.038	167.354		860	290.79	521.605		860	116.582	166.004		860	273.059	38.289		860	75.357	170.318		860	69.151
861	90.872	35.776		861	53.193	285.675		861	92.645	258.818		861	114.366	418.085		861	115.252	42.227		861	145.395	49.241		861	167.116	91.958		861	70.038	171.741		861	290.79	517.608		861	116.582	172.608		861	273.059	39.541		861	75.357	162.947		861	69.151
862	90.872	32.141		862	53.193	269.225		862	92.645	270.799		862	114.366	419.833		862	115.252	43.569		862	145.395	48.976		862	167.116	97.769		862	70.038	175.323		862	290.79	526.878		862	116.582	174.555		862	273.059	39.63		862	75.357	168.147		862	69.151
863	90.872	33.005		863	53.193	282.742		863	92.645	271.048		863	114.366	415.733		863	115.252	42.95		863	145.395	44.939		863	167.116	88.493		863	70.038	172.399		863	290.79	521.491		863	116.582	165.331		863	273.059	42.25		863	75.357	163.888		863	69.151
864	90.872	33.351		864	53.193	272.417		864	92.645	266.761		864	114.366	417.678		864	115.252	45.062		864	145.395	45.399		864	167.116	93.573		864	70.038	169.816		864	290.79	525.134		864	116.582	170.407		864	273.059	40.174		864	75.357	172.747		864	69.151
865	90.872	34.205		865	53.193	280.5		865	92.645	256.703		865	114.366	431.229		865	115.252	42.185		865	145.395	49.037		865	167.116	93.812		865	70.038	177.247		865	290.79	528.898		865	116.582	167.684		865	273.059	39.891		865	75.357	163.1		865	69.151
866	90.872	33.537		866	53.193	282.058		866	92.645	252.713		866	114.366	426.457		866	115.252	45.777		866	145.395	47.951		866	167.116	92.501		866	70.038	179.816		866	290.79	531.512		866	116.582	168.654		866	273.059	37.612		866	75.357	177.918		866	69.151
867	90.872	34.151		867	53.193	277.025		867	92.645	259.459		867	114.366	416.368		867	115.252	43.581		867	145.395	46.872		867	167.116	92.451		867	70.038	172.608		867	290.79	529.444		867	116.582	174.422		867	273.059	38.201		867	75.357	169.653		867	69.151
868	90.872	32.912		868	53.193	288.675		868	92.645	250.957		868	114.366	429.054		868	115.252	43.708		868	145.395	47.451		868	167.116	90.316		868	70.038	174.089		868	290.79	520.197		868	116.582	174.825		868	273.059	41.558		868	75.357	167.429		868	69.151
869	90.872	34.327		869	53.193	284.325		869	92.645	257.66		869	114.366	421.516		869	115.252	43.304		869	145.395	50.027		869	167.116	93.103		869	70.038	175.475		869	290.79	523.474		869	116.582	170.034		869	273.059	40.779		869	75.357	168.394		869	69.151
870	90.872	35.449		870	53.193	282.442		870	92.645	262.928		870	114.366	427.946		870	115.252	42.219		870	145.395	48.838		870	167.116	94.732		870	70.038	179.937		870	290.79	526.712		870	116.582	166.954		870	273.059	40.753		870	75.357	166.006		870	69.151
871	90.872	33.605		871	53.193	292.392		871	92.645	253.301		871	114.366	425.957		871	115.252	44.3		871	145.395	47.942		871	167.116	93.369		871	70.038	174.07		871	290.79	524.253		871	116.582	166.559		871	273.059	39.076		871	75.357	163.871		871	69.151
872	90.872	33.298		872	53.193	294.917		872	92.645	262.536		872	114.366	426.047		872	115.252	43.215		872	145.395	48.75		872	167.116	89.43		872	70.038	177.228		872	290.79	529.232		872	116.582	173.338		872	273.059	39.654		872	75.357	161.988		872	69.151
873	90.872	34.985		873	53.193	279.25		873	92.645	256.526		873	114.366	434.845		873	115.252	42.95		873	145.395	48.262		873	167.116	90.756		873	70.038	174.975		873	290.79	517.614		873	116.582	167.81		873	273.059	38.203		873	75.357	175.2		873	69.151
874	90.872	35.288		874	53.193	294.25		874	92.645	267.943		874	114.366	429.109		874	115.252	43.873		874	145.395	49.113		874	167.116	89.432		874	70.038	180.595		874	290.79	519.662		874	116.582	173.38		874	273.059	38.602		874	75.357	162.724		874	69.151
875	90.872	33.566		875	53.193	286.833		875	92.645	268.823		875	114.366	426.752		875	115.252	43.508		875	145.395	46.848		875	167.116	91.838		875	70.038	177.937		875	290.79	516.948		875	116.582	168.065		875	273.059	38.664		875	75.357	160.318		875	69.151
876	90.872	33.985		876	53.193	286.367		876	92.645	255.947		876	114.366	433.946		876	115.252	42.781		876	145.395	47.604		876	167.116	94.032		876	70.038	176.399		876	290.79	519.494		876	116.582	165.825		876	273.059	38.552		876	75.357	165.1		876	69.151
877	90.872	34.395		877	53.193	285.45		877	92.645	249.34		877	114.366	423.186		877	115.252	43.073		877	145.395	47.936		877	167.116	88.302		877	70.038	180.291		877	290.79	519.941		877	116.582	166.449		877	273.059	38.252		877	75.357	157.412		877	69.151
878	90.872	35.532		878	53.193	276.242		878	92.645	255.507		878	114.366	427.876		878	115.252	43.569		878	145.395	48.436		878	167.116	90.443		878	70.038	191.291		878	290.79	519.073		878	116.582	162.403		878	273.059	39.807		878	75.357	170.335		878	69.151
879	90.872	35.649		879	53.193	279.542		879	92.645	252.344		879	114.366	426.527		879	115.252	42.738		879	145.395	45.93		879	167.116	89.753		879	70.038	180.285		879	290.79	526.587		879	116.582	164.414		879	273.059	39.513		879	75.357	163.512		879	69.151
880	90.872	33.927		880	53.193	285.4		880	92.645	250.187		880	114.366	422.302		880	115.252	39.804		880	145.395	46.061		880	167.116	88.836		880	70.038	188.013		880	290.79	515.892		880	116.582	165.787		880	273.059	37.393		880	75.357	162.412		880	69.151
881	90.872	33.141		881	53.193	269.642		881	92.645	253.632		881	114.366	425.229		881	115.252	43.015		881	145.395	48.991		881	167.116	91.653		881	70.038	187.81		881	290.79	521.035		881	116.582	167.141		881	273.059	37.456		881	75.357	166.124		881	69.151
882	90.872	32.746		882	53.193	267.75		882	92.645	262.249		882	114.366	431.547		882	115.252	43.342		882	145.395	48.293		882	167.116	89.122		882	70.038	182.259		882	290.79	526.573		882	116.582	169.221		882	273.059	39.192		882	75.357	161.6		882	69.151
883	90.872	33.81		883	53.193	281.883		883	92.645	257.139		883	114.366	424.128		883	115.252	42.304		883	145.395	45.957		883	167.116	92.817		883	70.038	183.095		883	290.79	522.175		883	116.582	163.837		883	273.059	39.334		883	75.357	158.818		883	69.151
884	90.872	34.99		884	53.193	275.933		884	92.645	238		884	114.366	422.058		884	115.252	42.304		884	145.395	48.515		884	167.116	93.308		884	70.038	182.905		884	290.79	521.715		884	116.582	167.65		884	273.059	37.662		884	75.357	171.747		884	69.151
885	90.872	33.283		885	53.193	271.883		885	92.645	235.11		885	114.366	429.771		885	115.252	44.873		885	145.395	46.476		885	167.116	89.456		885	70.038	185.532		885	290.79	518.732		885	116.582	165.741		885	273.059	38.854		885	75.357	170.582		885	69.151
886	90.872	34.907		886	53.193	281.683		886	92.645	246.196		886	114.366	435.136		886	115.252	41.773		886	145.395	46.497		886	167.116	89.87		886	70.038	188.386		886	290.79	523.404		886	116.582	165.601		886	273.059	39.287		886	75.357	161.818		886	69.151
887	90.872	32.824		887	53.193	271.333		887	92.645	243.904		887	114.366	423.419		887	115.252	42.058		887	145.395	46.997		887	167.116	89.08		887	70.038	190.051		887	290.79	523.386		887	116.582	174.129		887	273.059	36.836		887	75.357	168.071		887	69.151
888	90.872	33.961		888	53.193	264.083		888	92.645	240.029		888	114.366	439.721		888	115.252	44.042		888	145.395	45.997		888	167.116	90.019		888	70.038	188.013		888	290.79	517.087		888	116.582	164.886		888	273.059	37.896		888	75.357	160.459		888	69.151
889	90.872	34.668		889	53.193	283.833		889	92.645	231.411		889	114.366	433.426		889	115.252	42.569		889	145.395	46.491		889	167.116	95.902		889	70.038	180.506		889	290.79	524.799		889	116.582	169.369		889	273.059	40.047		889	75.357	166.853		889	69.151
890	90.872	32.376		890	53.193	270.867		890	92.645	231.627		890	114.366	434.5		890	115.252	41.8		890	145.395	43.997		890	167.116	95.419		890	70.038	184.703		890	290.79	520.697		890	116.582	167.198		890	273.059	39.274		890	75.357	161.524		890	69.151
891	90.872	34.478		891	53.193	268.692		891	92.645	233.33		891	114.366	443.07		891	115.252	40.481		891	145.395	44.689		891	167.116	93.621		891	70.038	183.127		891	290.79	522.84		891	116.582	166.494		891	273.059	39.627		891	75.357	164.3		891	69.151
892	90.872	33.61		892	53.193	281.525		892	92.645	239.182		892	114.366	429.942		892	115.252	42.027		892	145.395	42.296		892	167.116	95.302		892	70.038	198.057		892	290.79	512.61		892	116.582	166.061		892	273.059	38.894		892	75.357	166.6		892	69.151
893	90.872	33.541		893	53.193	277.65		893	92.645	235.077		893	114.366	434.496		893	115.252	44.65		893	145.395	43.491		893	167.116	91.294		893	70.038	186.576		893	290.79	510.831		893	116.582	164.122		893	273.059	38.951		893	75.357	171.6		893	69.151
894	90.872	32.18		894	53.193	276.792		894	92.645	221.909		894	114.366	436.547		894	115.252	40.242		894	145.395	45.128		894	167.116	88.178		894	70.038	194.228		894	290.79	512.181		894	116.582	172.395		894	273.059	38.774		894	75.357	160.5		894	69.151
895	90.872	34.566		895	53.193	271.242		895	92.645	230.522		895	114.366	430.364		895	115.252	42.635		895	145.395	45.299		895	167.116	91.284		895	70.038	203.297		895	290.79	527.343		895	116.582	166.027		895	273.059	39.841		895	75.357	171.088		895	69.151
896	90.872	34.668		896	53.193	287.05		896	92.645	230.335		896	114.366	429.236		896	115.252	39.858		896	145.395	43.604		896	167.116	88.56		896	70.038	194.848		896	290.79	519.195		896	116.582	169.19		896	273.059	41.244		896	75.357	166		896	69.151
897	90.872	34.015		897	53.193	271.242		897	92.645	224.742		897	114.366	432.364		897	115.252	41.6		897	145.395	44.555		897	167.116	90.761		897	70.038	193.013		897	290.79	516.489		897	116.582	162.471		897	273.059	38.183		897	75.357	163.929		897	69.151
898	90.872	34.98		898	53.193	282.608		898	92.645	229.828		898	114.366	428.86		898	115.252	41.504		898	145.395	44.03		898	167.116	86.971		898	70.038	193.88		898	290.79	522.149		898	116.582	172.392		898	273.059	40.208		898	75.357	161.676		898	69.151
899	90.872	33.751		899	53.193	279.233		899	92.645	224.77		899	114.366	441.853		899	115.252	40.088		899	145.395	45.317		899	167.116	88.284		899	70.038	198.943		899	290.79	513.59		899	116.582	171.901		899	273.059	39.946		899	75.357	170.435		899	69.151
900	90.872	33.844		900	53.193	283.933		900	92.645	227.464		900	114.366	427.109		900	115.252	43.385		900	145.395	44.082		900	167.116	90.353		900	70.038	197.335		900	290.79	513.544		900	116.582	164.183		900	273.059	40.977		900	75.357	156.912		900	69.151
901	90.872	33.463		901	53.193	285.442		901	92.645	230.196		901	114.366	427.946		901	115.252	39.65		901	145.395	44.973		901	167.116	87.202		901	70.038	188.759		901	290.79	504.48		901	116.582	174.795		901	273.059	39.281		901	75.357	162.453		901	69.151
902	90.872	33.654		902	53.193	280.683		902	92.645	227.105		902	114.366	435.961		902	115.252	38.396		902	145.395	43.393		902	167.116	86.247		902	70.038	194.943		902	290.79	506.151		902	116.582	170.087		902	273.059	39.708		902	75.357	161.571		902	69.151
903	90.872	37.093		903	53.193	287.083		903	92.645	221.249		903	114.366	426.38		903	115.252	43.165		903	145.395	42.482		903	167.116	86.483		903	70.038	202.095		903	290.79	508.663		903	116.582	175.061		903	273.059	40.45		903	75.357	159.653		903	69.151
904	90.872	33.415		904	53.193	275.258		904	92.645	221.196		904	114.366	441.453		904	115.252	43.092		904	145.395	43.03		904	167.116	86.451		904	70.038	205.816		904	290.79	504.712		904	116.582	167.449		904	273.059	40.237		904	75.357	165.524		904	69.151
905	90.872	33.288		905	53.193	280.908		905	92.645	219.383		905	114.366	439.244		905	115.252	41.346		905	145.395	44.436		905	167.116	85.692		905	70.038	196.968		905	290.79	504.468		905	116.582	171.392		905	273.059	39.869		905	75.357	160.588		905	69.151
906	90.872	33.99		906	53.193	286.4		906	92.645	216.665		906	114.366	430.779		906	115.252	40.638		906	145.395	40.436		906	167.116	83.687		906	70.038	195.987		906	290.79	512.724		906	116.582	175.437		906	273.059	38.985		906	75.357	163.976		906	69.151
907	90.872	34.2		907	53.193	279.592		907	92.645	215.153		907	114.366	431.826		907	115.252	39.654		907	145.395	44.107		907	167.116	87.218		907	70.038	195.684		907	290.79	501.218		907	116.582	174.171		907	273.059	39.183		907	75.357	159.353		907	69.151
908	90.872	33.595		908	53.193	285.133		908	92.645	219.713		908	114.366	430.225		908	115.252	39.642		908	145.395	44.494		908	167.116	85.814		908	70.038	195.234		908	290.79	504.095		908	116.582	172.643		908	273.059	39.849		908	75.357	165.171		908	69.151
909	90.872	34.766		909	53.193	286.817		909	92.645	220.833		909	114.366	447.097		909	115.252	42.65		909	145.395	43.265		909	167.116	84.488		909	70.038	195.544		909	290.79	484.681		909	116.582	174.49		909	273.059	40.622		909	75.357	166.3		909	69.151
910	90.872	34.863		910	53.193	290.9		910	92.645	221.344		910	114.366	443.453		910	115.252	41.681		910	145.395	41.97		910	167.116	89.703		910	70.038	194.778		910	290.79	490.248		910	116.582	173.589		910	273.059	40.498		910	75.357	165.629		910	69.151
911	90.872	32.234		911	53.193	269.433		911	92.645	223.531		911	114.366	430.422		911	115.252	40.323		911	145.395	45.915		911	167.116	88.538		911	70.038	191.234		911	290.79	483.963		911	116.582	169.061		911	273.059	39.3		911	75.357	170.159		911	69.151
912	90.872	34.971		912	53.193	272.042		912	92.645	215.024		912	114.366	435.136		912	115.252	42.738		912	145.395	42.412		912	167.116	88.812		912	70.038	193.361		912	290.79	490.55		912	116.582	171.905		912	273.059	40.734		912	75.357	161.624		912	69.151
913	90.872	34.405		913	53.193	267.267		913	92.645	215.512		913	114.366	443.601		913	115.252	43.562		913	145.395	43.762		913	167.116	91.252		913	70.038	194.481		913	290.79	486.712		913	116.582	167.654		913	273.059	39.146		913	75.357	167.394		913	69.151
914	90.872	32.937		914	53.193	269.542		914	92.645	212.818		914	114.366	439.667		914	115.252	41.731		914	145.395	44.765		914	167.116	87.586		914	70.038	194.652		914	290.79	496.97		914	116.582	176.068		914	273.059	39.961		914	75.357	158.153		914	69.151
915	90.872	35.595		915	53.193	267.675		915	92.645	216.196		915	114.366	437.814		915	115.252	43.435		915	145.395	44.994		915	167.116	90.684		915	70.038	201.962		915	290.79	496.966		915	116.582	177.532		915	273.059	40.664		915	75.357	167.694		915	69.151
916	90.872	33.663		916	53.193	271.958		916	92.645	212.45		916	114.366	439.717		916	115.252	40.869		916	145.395	44.101		916	167.116	87.96		916	70.038	203.101		916	290.79	506.095		916	116.582	175.194		916	273.059	40.664		916	75.357	160.341		916	69.151
917	90.872	31.922		917	53.193	266.467		917	92.645	206.545		917	114.366	436.209		917	115.252	40.55		917	145.395	45.564		917	167.116	89.716		917	70.038	200.639		917	290.79	508.335		917	116.582	179.616		917	273.059	39.82		917	75.357	161.424		917	69.151
918	90.872	33.961		918	53.193	276.417		918	92.645	211.005		918	114.366	438.899		918	115.252	42.885		918	145.395	45.223		918	167.116	92.584		918	70.038	191.5		918	290.79	502.027		918	116.582	173.753		918	273.059	39.847		918	75.357	171.082		918	69.151
919	90.872	32.439		919	53.193	260.483		919	92.645	203.833		919	114.366	439.953		919	115.252	40.958		919	145.395	45.64		919	167.116	87.708		919	70.038	198.291		919	290.79	505.802		919	116.582	167.289		919	273.059	40.295		919	75.357	164.3		919	69.151
920	90.872	34.722		920	53.193	277.592		920	92.645	208.589		920	114.366	434.186		920	115.252	41.977		920	145.395	46.921		920	167.116	85.756		920	70.038	196.43		920	290.79	503.265		920	116.582	176.829		920	273.059	39.391		920	75.357	161.529		920	69.151
921	90.872	33.346		921	53.193	288.633		921	92.645	220.67		921	114.366	444.977		921	115.252	41.542		921	145.395	43.585		921	167.116	89.605		921	70.038	194.943		921	290.79	498.744		921	116.582	175.49		921	273.059	40.709		921	75.357	169.971		921	69.151
922	90.872	31.639		922	53.193	272.008		922	92.645	208.632		922	114.366	429.833		922	115.252	39.058		922	145.395	44.872		922	167.116	91.729		922	70.038	190.354		922	290.79	508.979		922	116.582	174.54		922	273.059	39.44		922	75.357	174.541		922	69.151
923	90.872	32.824		923	53.193	271.083		923	92.645	212.498		923	114.366	425		923	115.252	39.023		923	145.395	46.405		923	167.116	90.984		923	70.038	200.563		923	290.79	498.113		923	116.582	175.319		923	273.059	41.391		923	75.357	153.176		923	69.151
924	90.872	32.756		924	53.193	275.925		924	92.645	212.785		924	114.366	433.562		924	115.252	44.777		924	145.395	46.037		924	167.116	85.637		924	70.038	191.196		924	290.79	505.188		924	116.582	171.369		924	273.059	40.375		924	75.357	163.282		924	69.151
925	90.872	35.649		925	53.193	280.167		925	92.645	216.703		925	114.366	436.605		925	115.252	40.623		925	145.395	45.473		925	167.116	87.011		925	70.038	192.873		925	290.79	512.531		925	116.582	174.35		925	273.059	39.612		925	75.357	158.218		925	69.151
926	90.872	33.815		926	53.193	268.608		926	92.645	212.603		926	114.366	444.57		926	115.252	40.977		926	145.395	44.954		926	167.116	86.891		926	70.038	197.639		926	290.79	499.991		926	116.582	177.468		926	273.059	39.106		926	75.357	158.994		926	69.151
927	90.872	34.927		927	53.193	270.208		927	92.645	214.244		927	114.366	429.736		927	115.252	40.773		927	145.395	47.174		927	167.116	89.377		927	70.038	198.595		927	290.79	509.814		927	116.582	171.989		927	273.059	40.193		927	75.357	169.429		927	69.151
928	90.872	33.922		928	53.193	269.408		928	92.645	214.258		928	114.366	430.283		928	115.252	42.392		928	145.395	47.576		928	167.116	87.042		928	70.038	188.968		928	290.79	504.171		928	116.582	176.183		928	273.059	39.086		928	75.357	165.688		928	69.151
929	90.872	35.302		929	53.193	269.375		929	92.645	210.029		929	114.366	430.143		929	115.252	41.419		929	145.395	45.765		929	167.116	91.202		929	70.038	196.386		929	290.79	505.488		929	116.582	175.445		929	273.059	40.633		929	75.357	154.006		929	69.151
930	90.872	35.732		930	53.193	275.492		930	92.645	204.421		930	114.366	435.562		930	115.252	40.015		930	145.395	46.28		930	167.116	92.639		930	70.038	197.785		930	290.79	497.797		930	116.582	171.859		930	273.059	40.112		930	75.357	168.876		930	69.151
931	90.872	32.493		931	53.193	280.683		931	92.645	209.282		931	114.366	434.919		931	115.252	41.504		931	145.395	45.317		931	167.116	89.719		931	70.038	193.532		931	290.79	506.768		931	116.582	180.92		931	273.059	40.339		931	75.357	163.606		931	69.151
932	90.872	35.171		932	53.193	275.175		932	92.645	202.316		932	114.366	438.388		932	115.252	42.515		932	145.395	47.043		932	167.116	90.878		932	70.038	195.475		932	290.79	503.128		932	116.582	175.97		932	273.059	39.644		932	75.357	164.224		932	69.151
933	90.872	32.922		933	53.193	281.325		933	92.645	212.737		933	114.366	437.26		933	115.252	42.462		933	145.395	47.11		933	167.116	89.568		933	70.038	193.184		933	290.79	503.534		933	116.582	169.023		933	273.059	38.849		933	75.357	162.206		933	69.151
934	90.872	35.39		934	53.193	271.1		934	92.645	212.033		934	114.366	421.178		934	115.252	41.223		934	145.395	44.826		934	167.116	90.801		934	70.038	198.854		934	290.79	504.288		934	116.582	176.791		934	273.059	39.542		934	75.357	158.488		934	69.151
935	90.872	33.912		935	53.193	264.95		935	92.645	214.665		935	114.366	432.624		935	115.252	40.188		935	145.395	44.945		935	167.116	89.414		935	70.038	197.842		935	290.79	513.3		935	116.582	166.357		935	273.059	39.576		935	75.357	160.141		935	69.151
936	90.872	32.99		936	53.193	276.975		936	92.645	208.9		936	114.366	419.492		936	115.252	41.096		936	145.395	44.741		936	167.116	92.554		936	70.038	197.918		936	290.79	506.608		936	116.582	174.494		936	273.059	38.607		936	75.357	170.706		936	69.151
937	90.872	32.654		937	53.193	282.433		937	92.645	213.804		937	114.366	428.236		937	115.252	41.938		937	145.395	46.78		937	167.116	94.931		937	70.038	189.639		937	290.79	503.14		937	116.582	177.951		937	273.059	39.727		937	75.357	164.606		937	69.151
938	90.872	34.893		938	53.193	274.683		938	92.645	197.488		938	114.366	424.686		938	115.252	40.862		938	145.395	45.902		938	167.116	92.419		938	70.038	200.335		938	290.79	493.732		938	116.582	174.015		938	273.059	38.745		938	75.357	162.659		938	69.151
939	90.872	35.244		939	53.193	265.592		939	92.645	203.876		939	114.366	429.411		939	115.252	40.454		939	145.395	46.863		939	167.116	91.477		939	70.038	204.975		939	290.79	500.311		939	116.582	174.049		939	273.059	39.466		939	75.357	167.412		939	69.151
940	90.872	33.751		940	53.193	267.55		940	92.645	203.144		940	114.366	422.492		940	115.252	41.481		940	145.395	46.22		940	167.116	89.679		940	70.038	204.468		940	290.79	496.12		940	116.582	176.065		940	273.059	40.359		940	75.357	169.2		940	69.151
941	90.872	32.141		941	53.193	288.525		941	92.645	202.167		941	114.366	411.864		941	115.252	42.012		941	145.395	44.037		941	167.116	89.772		941	70.038	196.5		941	290.79	499.331		941	116.582	167.624		941	273.059	39.073		941	75.357	165.271		941	69.151
942	90.872	32.59		942	53.193	284.95		942	92.645	201.483		942	114.366	434.302		942	115.252	40.735		942	145.395	45.762		942	167.116	92.138		942	70.038	196.747		942	290.79	504.358		942	116.582	169.913		942	273.059	39.584		942	75.357	168.724		942	69.151
943	90.872	34.824		943	53.193	277.967		943	92.645	203.321		943	114.366	416.213		943	115.252	41.2		943	145.395	46.668		943	167.116	91.09		943	70.038	199.551		943	290.79	492.704		943	116.582	171.886		943	273.059	39.391		943	75.357	168.394		943	69.151
944	90.872	35.054		944	53.193	280.375		944	92.645	198.062		944	114.366	418.938		944	115.252	39.681		944	145.395	44.97		944	167.116	90.65		944	70.038	195.753		944	290.79	492.884		944	116.582	169.471		944	273.059	39.313		944	75.357	172.794		944	69.151
945	90.872	31.083		945	53.193	268		945	92.645	195.239		945	114.366	423.899		945	115.252	40.75		945	145.395	49.912		945	167.116	92.432		945	70.038	210.848		945	290.79	497.875		945	116.582	167.183		945	273.059	39.636		945	75.357	167.741		945	69.151
946	90.872	33.288		946	53.193	255.792		946	92.645	202.038		946	114.366	421.329		946	115.252	40.992		946	145.395	48.567		946	167.116	93.218		946	70.038	210.101		946	290.79	500.085		946	116.582	172.426		946	273.059	38.143		946	75.357	177.335		946	69.151
947	90.872	33.205		947	53.193	258.6		947	92.645	195.23		947	114.366	414.376		947	115.252	39.108		947	145.395	47.095		947	167.116	94.915		947	70.038	197.854		947	290.79	498.556		947	116.582	171.015		947	273.059	39.453		947	75.357	164.141		947	69.151
948	90.872	35.015		948	53.193	276.758		948	92.645	201.139		948	114.366	425.097		948	115.252	37.685		948	145.395	45.36		948	167.116	90.318		948	70.038	197.563		948	290.79	501.052		948	116.582	166.597		948	273.059	39.047		948	75.357	165.647		948	69.151
949	90.872	34.951		949	53.193	266.1		949	92.645	198.847		949	114.366	416.93		949	115.252	39.735		949	145.395	47.704		949	167.116	92.793		949	70.038	199.633		949	290.79	500.579		949	116.582	171.281		949	273.059	37.133		949	75.357	172.965		949	69.151
950	90.872	36.702		950	53.193	266.517		950	92.645	195.813		950	114.366	420.651		950	115.252	39.942		950	145.395	45.338		950	167.116	94.186		950	70.038	192.734		950	290.79	494.364		950	116.582	168.411		950	273.059	39.771		950	75.357	174.076		950	69.151
951	90.872	33.922		951	53.193	264.983		951	92.645	202.517		951	114.366	420.081		951	115.252	39.231		951	145.395	48.091		951	167.116	89.358		951	70.038	195.158		951	290.79	489.695		951	116.582	166.091		951	273.059	37.591		951	75.357	168.012		951	69.151
952	90.872	34.727		952	53.193	264.892		952	92.645	195.756		952	114.366	422.198		952	115.252	40.454		952	145.395	47.939		952	167.116	87.271		952	70.038	192.759		952	290.79	487.858		952	116.582	170.684		952	273.059	37.82		952	75.357	162.682		952	69.151
953	90.872	35.161		953	53.193	259.367		953	92.645	195.507		953	114.366	411.876		953	115.252	39.669		953	145.395	46.692		953	167.116	86.862		953	70.038	196.646		953	290.79	495.299		953	116.582	168.464		953	273.059	38.851		953	75.357	165.153		953	69.151
954	90.872	33.863		954	53.193	259.775		954	92.645	204.512		954	114.366	422.43		954	115.252	38.646		954	145.395	44.994		954	167.116	86.119		954	70.038	192.386		954	290.79	498.457		954	116.582	171.118		954	273.059	37.357		954	75.357	165.882		954	69.151
955	90.872	34.068		955	53.193	273.167		955	92.645	197.431		955	114.366	431.539		955	115.252	40.035		955	145.395	47.308		955	167.116	93.645		955	70.038	198.108		955	290.79	486.145		955	116.582	166.597		955	273.059	37.648		955	75.357	167.918		955	69.151
956	90.872	34.141		956	53.193	268.3		956	92.645	193.297		956	114.366	417.632		956	115.252	38.958		956	145.395	46.53		956	167.116	87.541		956	70.038	190.449		956	290.79	496.405		956	116.582	171.418		956	273.059	37.67		956	75.357	159.018		956	69.151
957	90.872	33.166		957	53.193	263.092		957	92.645	193.158		957	114.366	424.5		957	115.252	39.554		957	145.395	46.524		957	167.116	84.645		957	70.038	201.354		957	290.79	493.39		957	116.582	168.513		957	273.059	39.078		957	75.357	167.588		957	69.151
958	90.872	34.312		958	53.193	267.933		958	92.645	189.062		958	114.366	420.849		958	115.252	40.604		958	145.395	47.137		958	167.116	96.958		958	70.038	194.12		958	290.79	490.43		958	116.582	175.894		958	273.059	37.221		958	75.357	170.724		958	69.151
959	90.872	33.956		959	53.193	264.192		959	92.645	198.78		959	114.366	412.876		959	115.252	39.238		959	145.395	47.387		959	167.116	85.271		959	70.038	192.797		959	290.79	480.919		959	116.582	170.502		959	273.059	38.692		959	75.357	167.612		959	69.151
960	90.872	31.976		960	53.193	268.783		960	92.645	195.062		960	114.366	420.764		960	115.252	38.942		960	145.395	45.354		960	167.116	90.353		960	70.038	191.759		960	290.79	483.791		960	116.582	171.456		960	273.059	38.295		960	75.357	156.806		960	69.151
961	90.872	35.737		961	53.193	276.167		961	92.645	200.512		961	114.366	405.163		961	115.252	39.508		961	145.395	46.756		961	167.116	86.674		961	70.038	196.722		961	290.79	484.274		961	116.582	166.791		961	273.059	37.748		961	75.357	169.365		961	69.151
962	90.872	33.259		962	53.193	261.108		962	92.645	183.282		962	114.366	407.484		962	115.252	37.846		962	145.395	46.622		962	167.116	90.239		962	70.038	194.272		962	290.79	489.155		962	116.582	170.692		962	273.059	36.547		962	75.357	161.8		962	69.151
963	90.872	33.678		963	53.193	248.383		963	92.645	202.421		963	114.366	409.372		963	115.252	39.635		963	145.395	47.476		963	167.116	85.451		963	70.038	200.93		963	290.79	493.971		963	116.582	165.529		963	273.059	39.245		963	75.357	154.188		963	69.151
964	90.872	33.566		964	53.193	267.825		964	92.645	190.493		964	114.366	418.415		964	115.252	38.481		964	145.395	43.89		964	167.116	90.398		964	70.038	209.918		964	290.79	486.181		964	116.582	163.749		964	273.059	37.534		964	75.357	167.318		964	69.151
965	90.872	32.673		965	53.193	267.55		965	92.645	186.761		965	114.366	413.88		965	115.252	37.346		965	145.395	46.439		965	167.116	87.337		965	70.038	202.272		965	290.79	491.477		965	116.582	164.715		965	273.059	38.998		965	75.357	161.629		965	69.151
966	90.872	35.439		966	53.193	257.725		966	92.645	190.23		966	114.366	407.298		966	115.252	39.185		966	145.395	44.226		966	167.116	89.098		966	70.038	194.633		966	290.79	487.55		966	116.582	162.338		966	273.059	37.831		966	75.357	167.971		966	69.151
967	90.872	32.78		967	53.193	258.258		967	92.645	191.254		967	114.366	407.605		967	115.252	38.865		967	145.395	44.131		967	167.116	92.477		967	70.038	203.127		967	290.79	487.649		967	116.582	167.011		967	273.059	37.481		967	75.357	157.382		967	69.151
968	90.872	34.459		968	53.193	261.717		968	92.645	197.196		968	114.366	405.62		968	115.252	39.696		968	145.395	43.488		968	167.116	90.416		968	70.038	208.722		968	290.79	488.209		968	116.582	168.665		968	273.059	38.245		968	75.357	157.806		968	69.151
969	90.872	34.093		969	53.193	264.225		969	92.645	194.005		969	114.366	414.353		969	115.252	36.504		969	145.395	43.948		969	167.116	91.607		969	70.038	202.924		969	290.79	479.742		969	116.582	167.684		969	273.059	39.347		969	75.357	164.847		969	69.151
970	90.872	34.863		970	53.193	272.417		970	92.645	189.445		970	114.366	414.547		970	115.252	39.612		970	145.395	47.457		970	167.116	88.777		970	70.038	201.19		970	290.79	479.657		970	116.582	170.749		970	273.059	37.433		970	75.357	157.824		970	69.151
971	90.872	35.634		971	53.193	257.058		971	92.645	184.66		971	114.366	413.209		971	115.252	40.131		971	145.395	44.006		971	167.116	88.377		971	70.038	199.006		971	290.79	478.392		971	116.582	165.388		971	273.059	36.39		971	75.357	163.612		971	69.151
972	90.872	36.015		972	53.193	263.292		972	92.645	186.818		972	114.366	409.492		972	115.252	40.058		972	145.395	45.387		972	167.116	91.761		972	70.038	197.285		972	290.79	484.941		972	116.582	163.662		972	273.059	39.519		972	75.357	164.653		972	69.151
973	90.872	32.566		973	53.193	262.192		973	92.645	180.67		973	114.366	412.318		973	115.252	36.996		973	145.395	46.012		973	167.116	93.621		973	70.038	208.595		973	290.79	495.191		973	116.582	168.152		973	273.059	37.679		973	75.357	154.853		973	69.151
974	90.872	33.712		974	53.193	267.183		974	92.645	189.014		974	114.366	408.233		974	115.252	38.723		974	145.395	48.021		974	167.116	92.162		974	70.038	202.209		974	290.79	488.108		974	116.582	161.331		974	273.059	36.843		974	75.357	159.512		974	69.151
975	90.872	31.541		975	53.193	258.967		975	92.645	180.746		975	114.366	408.078		975	115.252	37.388		975	145.395	46.698		975	167.116	90.525		975	70.038	208.962		975	290.79	487.273		975	116.582	171.525		975	273.059	37.498		975	75.357	157.012		975	69.151
976	90.872	35.512		976	53.193	274		976	92.645	182.072		976	114.366	407.802		976	115.252	39.138		976	145.395	47.506		976	167.116	90.207		976	70.038	202.475		976	290.79	486.381		976	116.582	166.251		976	273.059	38.534		976	75.357	154.018		976	69.151
977	90.872	34.795		977	53.193	264		977	92.645	194.813		977	114.366	415.581		977	115.252	38.565		977	145.395	44.796		977	167.116	94.082		977	70.038	205.911		977	290.79	479.494		977	116.582	169.738		977	273.059	38.343		977	75.357	152.176		977	69.151
978	90.872	33.717		978	53.193	266.825		978	92.645	183.684		978	114.366	413.178		978	115.252	36.854		978	145.395	46.14		978	167.116	89.485		978	70.038	205.468		978	290.79	479.887		978	116.582	163.441		978	273.059	39.81		978	75.357	151.112		978	69.151
979	90.872	35.015		979	53.193	262.8		979	92.645	181.622		979	114.366	401.957		979	115.252	38.896		979	145.395	42.415		979	167.116	92.923		979	70.038	201.962		979	290.79	477.285		979	116.582	170.205		979	273.059	37.997		979	75.357	156.259		979	69.151
980	90.872	34.444		980	53.193	257.65		980	92.645	184.632		980	114.366	409.729		980	115.252	36.446		980	145.395	46.396		980	167.116	97.499		980	70.038	209.677		980	290.79	479.221		980	116.582	167.122		980	273.059	39.881		980	75.357	159.953		980	69.151
981	90.872	31.81		981	53.193	262.333		981	92.645	186.182		981	114.366	408.946		981	115.252	39.631		981	145.395	46.506		981	167.116	92.456		981	70.038	205.354		981	290.79	485.491		981	116.582	159.144		981	273.059	38.602		981	75.357	159.5		981	69.151
982	90.872	33.376		982	53.193	267.325		982	92.645	190.172		982	114.366	407.233		982	115.252	39.162		982	145.395	45.768		982	167.116	91.836		982	70.038	211.873		982	290.79	491.061		982	116.582	164.608		982	273.059	37.909		982	75.357	156.906		982	69.151
983	90.872	34.298		983	53.193	259.983		983	92.645	179.9		983	114.366	398.314		983	115.252	38.004		983	145.395	46.143		983	167.116	88.91		983	70.038	207.342		983	290.79	492.938		983	116.582	162.3		983	273.059	38.852		983	75.357	155.488		983	69.151
984	90.872	33.312		984	53.193	253.283		984	92.645	179.55		984	114.366	408.295		984	115.252	38.923		984	145.395	46.335		984	167.116	92.053		984	70.038	205.563		984	290.79	488.8		984	116.582	169.004		984	273.059	37.081		984	75.357	162.065		984	69.151
985	90.872	34.59		985	53.193	258.875		985	92.645	182.904		985	114.366	405.973		985	115.252	38.273		985	145.395	46.726		985	167.116	92.565		985	70.038	200.633		985	290.79	488.2		985	116.582	161.3		985	273.059	38.614		985	75.357	163.112		985	69.151
986	90.872	33.702		986	53.193	264.592		986	92.645	183.273		986	114.366	423.236		986	115.252	38.073		986	145.395	46.893		986	167.116	87.218		986	70.038	200.392		986	290.79	494.104		986	116.582	163.989		986	273.059	38.291		986	75.357	161.676		986	69.151
987	90.872	32.976		987	53.193	262.992		987	92.645	174.278		987	114.366	416.581		987	115.252	42.046		987	145.395	47.454		987	167.116	87.427		987	70.038	202.076		987	290.79	488.945		987	116.582	160.741		987	273.059	37.664		987	75.357	164.594		987	69.151
988	90.872	36.156		988	53.193	263.658		988	92.645	178.775		988	114.366	405.043		988	115.252	37.131		988	145.395	47.771		988	167.116	89.905		988	70.038	205.975		988	290.79	484.633		988	116.582	162.259		988	273.059	37.351		988	75.357	159.665		988	69.151
989	90.872	33.234		989	53.193	266.033		989	92.645	176.861		989	114.366	403.302		989	115.252	37.965		989	145.395	47.091		989	167.116	88.846		989	70.038	197		989	290.79	488.101		989	116.582	157.087		989	273.059	39.26		989	75.357	155.753		989	69.151
990	90.872	33.659		990	53.193	255.217		990	92.645	174.048		990	114.366	408.888		990	115.252	37.573		990	145.395	48.061		990	167.116	88.814		990	70.038	199.753		990	290.79	481.956		990	116.582	166.316		990	273.059	36.872		990	75.357	156.376		990	69.151
991	90.872	33.093		991	53.193	249.833		991	92.645	177.383		991	114.366	418.717		991	115.252	37.896		991	145.395	48.174		991	167.116	88.698		991	70.038	193.013		991	290.79	488.287		991	116.582	165.008		991	273.059	38.516		991	75.357	164.171		991	69.151
992	90.872	35.698		992	53.193	259.908		992	92.645	175.316		992	114.366	424.961		992	115.252	36.788		992	145.395	47.393		992	167.116	85.363		992	70.038	208.316		992	290.79	488.486		992	116.582	159.627		992	273.059	39.282		992	75.357	155.694		992	69.151
993	90.872	35.551		993	53.193	264.517		993	92.645	177.392		993	114.366	406.178		993	115.252	36.654		993	145.395	47.18		993	167.116	88.83		993	70.038	204.462		993	290.79	481.814		993	116.582	158.586		993	273.059	38.984		993	75.357	155.006		993	69.151
994	90.872	32.371		994	53.193	258.242		994	92.645	176.335		994	114.366	414.841		994	115.252	39.415		994	145.395	46.381		994	167.116	89.682		994	70.038	195.589		994	290.79	489.959		994	116.582	168.973		994	273.059	38.037		994	75.357	154.929		994	69.151
995	90.872	33.624		995	53.193	248.233		995	92.645	175.55		995	114.366	406.182		995	115.252	39.527		995	145.395	46.299		995	167.116	89.637		995	70.038	198.684		995	290.79	490.915		995	116.582	166.152		995	273.059	38.036		995	75.357	171.776		995	69.151
996	90.872	35.332		996	53.193	257.975		996	92.645	171.024		996	114.366	401.593		996	115.252	38.35		996	145.395	48.851		996	167.116	91.687		996	70.038	198.278		996	290.79	488.428		996	116.582	161.962		996	273.059	37.455		996	75.357	159.024		996	69.151
997	90.872	36.254		997	53.193	264.692		997	92.645	177.182		997	114.366	416.333		997	115.252	38.458		997	145.395	48.954		997	167.116	95.419		997	70.038	196.468		997	290.79	480.098		997	116.582	167.867		997	273.059	37.588		997	75.357	161.029		997	69.151
998	90.872	35.078		998	53.193	259.008		998	92.645	177.019		998	114.366	416.69		998	115.252	38.181		998	145.395	48.902		998	167.116	88.703		998	70.038	196.684		998	290.79	483.119		998	116.582	159.749		998	273.059	37.227		998	75.357	157.006		998	69.151
999	90.872	34.254		999	53.193	249.942		999	92.645	179.703		999	114.366	410.256		999	115.252	38.281		999	145.395	46.872		999	167.116	92.3		999	70.038	198.101		999	290.79	477.739		999	116.582	160.548		999	273.059	38.713		999	75.357	163.412		999	69.151
1000	90.872	33.507		1000	53.193	252.792		1000	92.645	167.727		1000	114.366	414.74		1000	115.252	39.538		1000	145.395	47.488		1000	167.116	89.074		1000	70.038	193.07		1000	290.79	476.03		1000	116.582	165.209		1000	273.059	39.099		1000	75.357	150.029		1000	69.151
1001	90.872	33.805		1001	53.193	262.483		1001	92.645	175.89		1001	114.366	413.826		1001	115.252	38.462		1001	145.395	47.317		1001	167.116	85.324		1001	70.038	190.696		1001	290.79	476.072		1001	116.582	159.148		1001	273.059	38.406		1001	75.357	151.235		1001	69.151
1002	90.872	33		1002	53.193	252.175		1002	92.645	176.78		1002	114.366	418.833		1002	115.252	39.05		1002	145.395	48.338		1002	167.116	90.228		1002	70.038	183.816		1002	290.79	480.529		1002	116.582	165.897		1002	273.059	37.633		1002	75.357	157.129		1002	69.151
1003	90.872	34.683		1003	53.193	258.2		1003	92.645	173.024		1003	114.366	411.031		1003	115.252	41.419		1003	145.395	47.759		1003	167.116	88.228		1003	70.038	179.671		1003	290.79	471.349		1003	116.582	163.464		1003	273.059	38.11		1003	75.357	151.976		1003	69.151
1004	90.872	33.654		1004	53.193	249.4		1004	92.645	167.124		1004	114.366	410.849		1004	115.252	41.146		1004	145.395	49.265		1004	167.116	87.13		1004	70.038	196.089		1004	290.79	466.581		1004	116.582	166.692		1004	273.059	38.226		1004	75.357	154.665		1004	69.151
1005	90.872	34.376		1005	53.193	260.658		1005	92.645	172.651		1005	114.366	401.372		1005	115.252	38.765		1005	145.395	47.043		1005	167.116	90.947		1005	70.038	190.456		1005	290.79	467.992		1005	116.582	163.418		1005	273.059	39.183		1005	75.357	159.882		1005	69.151
1006	90.872	33.795		1006	53.193	268.875		1006	92.645	171.167		1006	114.366	419.864		1006	115.252	41.4		1006	145.395	47.296		1006	167.116	87.175		1006	70.038	198.728		1006	290.79	463.088		1006	116.582	155.532		1006	273.059	38.631		1006	75.357	153.288		1006	69.151
1007	90.872	32.561		1007	53.193	250.758		1007	92.645	173.66		1007	114.366	411.035		1007	115.252	38.562		1007	145.395	49.515		1007	167.116	86.363		1007	70.038	185.405		1007	290.79	476.567		1007	116.582	164.829		1007	273.059	37.81		1007	75.357	162.441		1007	69.151
1008	90.872	33.663		1008	53.193	258.475		1008	92.645	173.115		1008	114.366	419.07		1008	115.252	40.277		1008	145.395	46.805		1008	167.116	87.321		1008	70.038	191.089		1008	290.79	471.402		1008	116.582	160.635		1008	273.059	39.394		1008	75.357	158.035		1008	69.151
1009	90.872	33.737		1009	53.193	269.208		1009	92.645	166.459		1009	114.366	405.469		1009	115.252	40.1		1009	145.395	46.338		1009	167.116	88.528		1009	70.038	187.335		1009	290.79	477.102		1009	116.582	160.133		1009	273.059	36.802		1009	75.357	149.094		1009	69.151
1010	90.872	34.112		1010	53.193	261.075		1010	92.645	168.038		1010	114.366	417.349		1010	115.252	39.704		1010	145.395	49.54		1010	167.116	84.759		1010	70.038	197.741		1010	290.79	482.309		1010	116.582	160.175		1010	273.059	36.938		1010	75.357	146.665		1010	69.151
1011	90.872	34.2		1011	53.193	255.192		1011	92.645	163.761		1011	114.366	413.089		1011	115.252	39.535		1011	145.395	47.366		1011	167.116	85.218		1011	70.038	190.063		1011	290.79	473.921		1011	116.582	165.646		1011	273.059	37.721		1011	75.357	152.012		1011	69.151
1012	90.872	34.161		1012	53.193	264.158		1012	92.645	173.239		1012	114.366	416.535		1012	115.252	39.588		1012	145.395	48.89		1012	167.116	85.806		1012	70.038	187.127		1012	290.79	475.111		1012	116.582	159.768		1012	273.059	38.273		1012	75.357	156.865		1012	69.151
1013	90.872	34.439		1013	53.193	263.133		1013	92.645	169.057		1013	114.366	410.647		1013	115.252	38.304		1013	145.395	47.159		1013	167.116	86.244		1013	70.038	196.785		1013	290.79	469.247		1013	116.582	162.616		1013	273.059	38.131		1013	75.357	162.3		1013	69.151
1014	90.872	35.683		1014	53.193	261.333		1014	92.645	166.584		1014	114.366	409.395		1014	115.252	40.496		1014	145.395	46.799		1014	167.116	87.764		1014	70.038	190.905		1014	290.79	467.753		1014	116.582	165.894		1014	273.059	38.696		1014	75.357	153.847		1014	69.151
1015	90.872	33.878		1015	53.193	256.517		1015	92.645	165.33		1015	114.366	406.376		1015	115.252	39.373		1015	145.395	46.817		1015	167.116	84.395		1015	70.038	194.272		1015	290.79	455.953		1015	116.582	166.224		1015	273.059	39.047		1015	75.357	153.071		1015	69.151
1016	90.872	35.127		1016	53.193	259.925		1016	92.645	169.919		1016	114.366	413.725		1016	115.252	40.546		1016	145.395	48.927		1016	167.116	82.382		1016	70.038	188.013		1016	290.79	463.934		1016	116.582	166.209		1016	273.059	38.248		1016	75.357	154.412		1016	69.151
1017	90.872	33.883		1017	53.193	267.667		1017	92.645	169.278		1017	114.366	412.399		1017	115.252	40.3		1017	145.395	46.909		1017	167.116	85.838		1017	70.038	192.323		1017	290.79	454.547		1017	116.582	161.004		1017	273.059	38.739		1017	75.357	158.382		1017	69.151
1018	90.872	34.766		1018	53.193	268.833		1018	92.645	166.651		1018	114.366	404.826		1018	115.252	39.819		1018	145.395	45.811		1018	167.116	79.976		1018	70.038	186.62		1018	290.79	460.532		1018	116.582	172.605		1018	273.059	37.971		1018	75.357	155.482		1018	69.151
1019	90.872	35.361		1019	53.193	249		1019	92.645	172.067		1019	114.366	417.845		1019	115.252	38.892		1019	145.395	48.732		1019	167.116	85.294		1019	70.038	194.5		1019	290.79	464.383		1019	116.582	154.194		1019	273.059	36.958		1019	75.357	156.212		1019	69.151
1020	90.872	34.434		1020	53.193	256.092		1020	92.645	163.871		1020	114.366	411.388		1020	115.252	39.985		1020	145.395	50.235		1020	167.116	82.313		1020	70.038	196.424		1020	290.79	469.867		1020	116.582	165.259		1020	273.059	37.463		1020	75.357	154.194		1020	69.151
1021	90.872	32.571		1021	53.193	265.458		1021	92.645	172.196		1021	114.366	418.826		1021	115.252	39.058		1021	145.395	47.808		1021	167.116	83.308		1021	70.038	193.057		1021	290.79	468.896		1021	116.582	165.259		1021	273.059	37.019		1021	75.357	162.947		1021	69.151
1022	90.872	33.737		1022	53.193	270.25		1022	92.645	168.78		1022	114.366	411.508		1022	115.252	39.919		1022	145.395	48.107		1022	167.116	83.504		1022	70.038	187.867		1022	290.79	464.488		1022	116.582	159.163		1022	273.059	38.196		1022	75.357	150.371		1022	69.151
1023	90.872	34.966		1023	53.193	270.692		1023	92.645	163.593		1023	114.366	407.074		1023	115.252	40.708		1023	145.395	49.11		1023	167.116	84.708		1023	70.038	191.614		1023	290.79	471.113		1023	116.582	157.795		1023	273.059	37.455		1023	75.357	159.353		1023	69.151
1024	90.872	35.078		1024	53.193	269.417		1024	92.645	166.689		1024	114.366	398.779		1024	115.252	38.808		1024	145.395	49.814		1024	167.116	82.072		1024	70.038	187.063		1024	290.79	466.165		1024	116.582	162.369		1024	273.059	35.857		1024	75.357	156.553		1024	69.151
1025	90.872	35.093		1025	53.193	261.992		1025	92.645	160.88		1025	114.366	402.516		1025	115.252	40.585		1025	145.395	47.213		1025	167.116	85.523		1025	70.038	197.323		1025	290.79	467		1025	116.582	159.719		1025	273.059	38.534		1025	75.357	151.282		1025	69.151
1026	90.872	32.624		1026	53.193	269.742		1026	92.645	170.919		1026	114.366	407.671		1026	115.252	42.738		1026	145.395	47.128		1026	167.116	84.04		1026	70.038	188.981		1026	290.79	476.832		1026	116.582	161.468		1026	273.059	37.721		1026	75.357	143.318		1026	69.151
1027	90.872	34.912		1027	53.193	263.075		1027	92.645	172.981		1027	114.366	407.496		1027	115.252	40.965		1027	145.395	48.256		1027	167.116	85.095		1027	70.038	192.443		1027	290.79	472.509		1027	116.582	158.768		1027	273.059	38.419		1027	75.357	156.518		1027	69.151
1028	90.872	33.595		1028	53.193	253.933		1028	92.645	168.153		1028	114.366	409.926		1028	115.252	41.904		1028	145.395	48.567		1028	167.116	86.053		1028	70.038	187.646		1028	290.79	457.982		1028	116.582	166.779		1028	273.059	36.883		1028	75.357	149.5		1028	69.151
1029	90.872	35.205		1029	53.193	263.717		1029	92.645	165.383		1029	114.366	414.965		1029	115.252	39.419		1029	145.395	46.591		1029	167.116	84.027		1029	70.038	183.253		1029	290.79	467.916		1029	116.582	163.669		1029	273.059	37.929		1029	75.357	155.994		1029	69.151
1030	90.872	33.673		1030	53.193	260.717		1030	92.645	172.431		1030	114.366	403.198		1030	115.252	38.212		1030	145.395	47.482		1030	167.116	85.451		1030	70.038	182.025		1030	290.79	479.64		1030	116.582	165.042		1030	273.059	38.266		1030	75.357	151.224		1030	69.151
1031	90.872	34.649		1031	53.193	268.383		1031	92.645	166.402		1031	114.366	401.512		1031	115.252	41.388		1031	145.395	47.966		1031	167.116	84.995		1031	70.038	184.241		1031	290.79	468.024		1031	116.582	157.346		1031	273.059	38.339		1031	75.357	149.565		1031	69.151
1032	90.872	33.79		1032	53.193	255.558		1032	92.645	162.416		1032	114.366	408.213		1032	115.252	40.277		1032	145.395	50.149		1032	167.116	87.202		1032	70.038	187.854		1032	290.79	470.812		1032	116.582	161.852		1032	273.059	37.914		1032	75.357	150.776		1032	69.151
1033	90.872	34.068		1033	53.193	270.267		1033	92.645	159.455		1033	114.366	410.089		1033	115.252	38.669		1033	145.395	47.113		1033	167.116	84.114		1033	70.038	184.481		1033	290.79	468.936		1033	116.582	155.205		1033	273.059	38.125		1033	75.357	152.371		1033	69.151
1034	90.872	32.449		1034	53.193	264.85		1034	92.645	167.201		1034	114.366	404.233		1034	115.252	41.654		1034	145.395	48.043		1034	167.116	84.419		1034	70.038	179.658		1034	290.79	472.776		1034	116.582	154.3		1034	273.059	37.318		1034	75.357	150.835		1034	69.151
1035	90.872	35.2		1035	53.193	265.975		1035	92.645	163.694		1035	114.366	410.043		1035	115.252	36.677		1035	145.395	46.695		1035	167.116	85.973		1035	70.038	182.614		1035	290.79	470.86		1035	116.582	160.897		1035	273.059	39.347		1035	75.357	148.082		1035	69.151
1036	90.872	35.683		1036	53.193	270.592		1036	92.645	165.048		1036	114.366	403.508		1036	115.252	38.627		1036	145.395	48.488		1036	167.116	83.361		1036	70.038	183.348		1036	290.79	466.956		1036	116.582	154.224		1036	273.059	37.026		1036	75.357	147.088		1036	69.151
1037	90.872	33.634		1037	53.193	272.725		1037	92.645	162.191		1037	114.366	411.961		1037	115.252	39.477		1037	145.395	46.677		1037	167.116	83.098		1037	70.038	182.962		1037	290.79	468.57		1037	116.582	156.167		1037	273.059	36.448		1037	75.357	152.824		1037	69.151
1038	90.872	33.18		1038	53.193	265.308		1038	92.645	155.675		1038	114.366	400.678		1038	115.252	39.546		1038	145.395	47.098		1038	167.116	83.279		1038	70.038	182.981		1038	290.79	468.907		1038	116.582	160.532		1038	273.059	39.344		1038	75.357	157.276		1038	69.151
1039	90.872	32.239		1039	53.193	262.558		1039	92.645	155.608		1039	114.366	417.682		1039	115.252	40.685		1039	145.395	48.427		1039	167.116	85.223		1039	70.038	181.12		1039	290.79	462.044		1039	116.582	160.529		1039	273.059	37.649		1039	75.357	158.118		1039	69.151
1040	90.872	33.922		1040	53.193	267.417		1040	92.645	169.981		1040	114.366	408.822		1040	115.252	37.404		1040	145.395	47.348		1040	167.116	85.613		1040	70.038	179.266		1040	290.79	467.63		1040	116.582	158.62		1040	273.059	38.64		1040	75.357	152.371		1040	69.151
1041	90.872	32.805		1041	53.193	273.35		1041	92.645	159.445		1041	114.366	414.574		1041	115.252	39.05		1041	145.395	45.75		1041	167.116	86.549		1041	70.038	188.165		1041	290.79	454.468		1041	116.582	157.38		1041	273.059	37.833		1041	75.357	148.647		1041	69.151
1042	90.872	32.976		1042	53.193	273.225		1042	92.645	159.876		1042	114.366	409.682		1042	115.252	39.923		1042	145.395	45.47		1042	167.116	81.955		1042	70.038	180.57		1042	290.79	464.026		1042	116.582	160.548		1042	273.059	37.8		1042	75.357	156.594		1042	69.151
1043	90.872	34.615		1043	53.193	261.325		1043	92.645	160.641		1043	114.366	407.915		1043	115.252	40.292		1043	145.395	44.311		1043	167.116	83.125		1043	70.038	184.19		1043	290.79	462.997		1043	116.582	152.129		1043	273.059	38.151		1043	75.357	162.482		1043	69.151
1044	90.872	33.654		1044	53.193	263.6		1044	92.645	152.957		1044	114.366	402.632		1044	115.252	38.758		1044	145.395	46.226		1044	167.116	87.244		1044	70.038	181.209		1044	290.79	463.026		1044	116.582	159.468		1044	273.059	39.865		1044	75.357	154.747		1044	69.151
1045	90.872	34.034		1045	53.193	255.75		1045	92.645	164.665		1045	114.366	414.795		1045	115.252	40.223		1045	145.395	46.162		1045	167.116	85.867		1045	70.038	183.627		1045	290.79	459.909		1045	116.582	149.905		1045	273.059	38.459		1045	75.357	147.5		1045	69.151
1046	90.872	32.849		1046	53.193	263		1046	92.645	160.416		1046	114.366	412.512		1046	115.252	39.727		1046	145.395	48.412		1046	167.116	87.337		1046	70.038	183.367		1046	290.79	469.317		1046	116.582	154.361		1046	273.059	39.437		1046	75.357	152.224		1046	69.151
1047	90.872	32.878		1047	53.193	267.642		1047	92.645	161.182		1047	114.366	402.953		1047	115.252	39.031		1047	145.395	45.695		1047	167.116	84.501		1047	70.038	171.741		1047	290.79	459.265		1047	116.582	159.992		1047	273.059	38.808		1047	75.357	148.565		1047	69.151
1048	90.872	32.815		1048	53.193	264.033		1048	92.645	159.928		1048	114.366	410.295		1048	115.252	36.8		1048	145.395	45.399		1048	167.116	85.775		1048	70.038	177.203		1048	290.79	473.174		1048	116.582	158.814		1048	273.059	38.885		1048	75.357	162.259		1048	69.151
1049	90.872	33.741		1049	53.193	282		1049	92.645	168.206		1049	114.366	413.86		1049	115.252	39.238		1049	145.395	47.317		1049	167.116	86.605		1049	70.038	181.443		1049	290.79	464.076		1049	116.582	158.772		1049	273.059	39.875		1049	75.357	148.859		1049	69.151
1050	90.872	31.756		1050	53.193	266.492		1050	92.645	171.292		1050	114.366	420.326		1050	115.252	37.823		1050	145.395	45.997		1050	167.116	82.865		1050	70.038	177.937		1050	290.79	473.671		1050	116.582	154.076		1050	273.059	36.893		1050	75.357	150.465		1050	69.151
1051	90.872	30.902		1051	53.193	258.192		1051	92.645	165.321		1051	114.366	426.229		1051	115.252	37.092		1051	145.395	46.53		1051	167.116	86.427		1051	70.038	172.114		1051	290.79	467.012		1051	116.582	158.589		1051	273.059	38.609		1051	75.357	155.453		1051	69.151
1052	90.872	33.893		1052	53.193	264.358		1052	92.645	167.895		1052	114.366	412.178		1052	115.252	38.358		1052	145.395	45.707		1052	167.116	84.592		1052	70.038	170.747		1052	290.79	451.668		1052	116.582	154.913		1052	273.059	36.768		1052	75.357	147.529		1052	69.151
1053	90.872	32.478		1053	53.193	267.667		1053	92.645	170.33		1053	114.366	413.554		1053	115.252	38.112		1053	145.395	48.567		1053	167.116	84.897		1053	70.038	170.766		1053	290.79	448.282		1053	116.582	163.639		1053	273.059	37.93		1053	75.357	142.041		1053	69.151
1054	90.872	34.288		1054	53.193	276.517		1054	92.645	162.263		1054	114.366	411.058		1054	115.252	38.477		1054	145.395	46.311		1054	167.116	82.369		1054	70.038	166.741		1054	290.79	458.227		1054	116.582	156.399		1054	273.059	37.812		1054	75.357	143.647		1054	69.151
1055	90.872	35.288		1055	53.193	265.392		1055	92.645	172.766		1055	114.366	419.26		1055	115.252	37.242		1055	145.395	44.896		1055	167.116	83.39		1055	70.038	165.81		1055	290.79	445.495		1055	116.582	162.057		1055	273.059	39.286		1055	75.357	147.582		1055	69.151
1056	90.872	33.117		1056	53.193	270.108		1056	92.645	170.612		1056	114.366	424.047		1056	115.252	39.646		1056	145.395	45.043		1056	167.116	88.135		1056	70.038	163.861		1056	290.79	457.752		1056	116.582	158.578		1056	273.059	37.627		1056	75.357	152.047		1056	69.151
1057	90.872	32.717		1057	53.193	253.025		1057	92.645	168.598		1057	114.366	417.326		1057	115.252	36.985		1057	145.395	45.838		1057	167.116	89.35		1057	70.038	169.728		1057	290.79	460.293		1057	116.582	156.722		1057	273.059	38.537		1057	75.357	157.782		1057	69.151
1058	90.872	32.839		1058	53.193	255.733		1058	92.645	163.962		1058	114.366	405.655		1058	115.252	40.181		1058	145.395	44.445		1058	167.116	87.305		1058	70.038	157.633		1058	290.79	461.136		1058	116.582	158.304		1058	273.059	40.133		1058	75.357	150.353		1058	69.151
1059	90.872	33.176		1059	53.193	260.3		1059	92.645	165.019		1059	114.366	408.349		1059	115.252	37.031		1059	145.395	45.256		1059	167.116	88.944		1059	70.038	166.892		1059	290.79	452.982		1059	116.582	157.471		1059	273.059	40.265		1059	75.357	149.082		1059	69.151
1060	90.872	32.015		1060	53.193	259.2		1060	92.645	162.292		1060	114.366	410.961		1060	115.252	39.108		1060	145.395	45.341		1060	167.116	88.133		1060	70.038	168.07		1060	290.79	460.572		1060	116.582	151.772		1060	273.059	39.039		1060	75.357	149.747		1060	69.151
1061	90.872	34.444		1061	53.193	247.3		1061	92.645	168.722		1061	114.366	409.922		1061	115.252	37.581		1061	145.395	42.887		1061	167.116	86.247		1061	70.038	169.57		1061	290.79	460.351		1061	116.582	158.521		1061	273.059	38.766		1061	75.357	147		1061	69.151
1062	90.872	34.132		1062	53.193	271.533		1062	92.645	161.842		1062	114.366	414.438		1062	115.252	38.904		1062	145.395	45.101		1062	167.116	90.194		1062	70.038	161.411		1062	290.79	456.058		1062	116.582	155.293		1062	273.059	39.17		1062	75.357	144.547		1062	69.151
1063	90.872	33.234		1063	53.193	262.175		1063	92.645	165.818		1063	114.366	418.779		1063	115.252	37.658		1063	145.395	46.671		1063	167.116	87.782		1063	70.038	172.044		1063	290.79	462.579		1063	116.582	160.43		1063	273.059	38.627		1063	75.357	142.794		1063	69.151
1064	90.872	33.229		1064	53.193	250.367		1064	92.645	162.392		1064	114.366	424.798		1064	115.252	39.612		1064	145.395	45.043		1064	167.116	90.477		1064	70.038	163.601		1064	290.79	463.915		1064	116.582	159.114		1064	273.059	38.172		1064	75.357	149.441		1064	69.151
1065	90.872	33.834		1065	53.193	254.292		1065	92.645	167.66		1065	114.366	417.298		1065	115.252	37.246		1065	145.395	45.628		1065	167.116	90.581		1065	70.038	170.519		1065	290.79	463.75		1065	116.582	154.521		1065	273.059	38.42		1065	75.357	148.147		1065	69.151
1066	90.872	33.893		1066	53.193	259.292		1066	92.645	161.976		1066	114.366	416.43		1066	115.252	36.054		1066	145.395	46.915		1066	167.116	85.931		1066	70.038	160.082		1066	290.79	466.015		1066	116.582	157.73		1066	273.059	38.774		1066	75.357	137.282		1066	69.151
1067	90.872	33.039		1067	53.193	261.567		1067	92.645	160.153		1067	114.366	416.988		1067	115.252	37.985		1067	145.395	46.171		1067	167.116	87.57		1067	70.038	155.772		1067	290.79	458.215		1067	116.582	155.202		1067	273.059	37.325		1067	75.357	157.512		1067	69.151
1068	90.872	33.083		1068	53.193	263.467		1068	92.645	162.646		1068	114.366	409.484		1068	115.252	36.25		1068	145.395	43.765		1068	167.116	90.955		1068	70.038	153.019		1068	290.79	456.787		1068	116.582	154.433		1068	273.059	37.432		1068	75.357	154.094		1068	69.151
1069	90.872	31.332		1069	53.193	255.708		1069	92.645	161.416		1069	114.366	408.481		1069	115.252	38.142		1069	145.395	43.82		1069	167.116	87.334		1069	70.038	159.013		1069	290.79	459.62		1069	116.582	165.783		1069	273.059	38.188		1069	75.357	147.453		1069	69.151
1070	90.872	34.985		1070	53.193	259.225		1070	92.645	161.703		1070	114.366	410.256		1070	115.252	38.646		1070	145.395	45.07		1070	167.116	89.448		1070	70.038	157.532		1070	290.79	453.302		1070	116.582	155.631		1070	273.059	37.333		1070	75.357	148.524		1070	69.151
1071	90.872	32.644		1071	53.193	265.583		1071	92.645	156.067		1071	114.366	407.043		1071	115.252	35.327		1071	145.395	43.165		1071	167.116	91.024		1071	70.038	159.671		1071	290.79	449.715		1071	116.582	158.042		1071	273.059	37.578		1071	75.357	151.359		1071	69.151
1072	90.872	31.737		1072	53.193	254.7		1072	92.645	160.215		1072	114.366	417.205		1072	115.252	38.035		1072	145.395	44.896		1072	167.116	88.016		1072	70.038	149.633		1072	290.79	458.197		1072	116.582	154.464		1072	273.059	38.182		1072	75.357	148.641		1072	69.151
1073	90.872	34.298		1073	53.193	261.725		1073	92.645	162.057		1073	114.366	419.791		1073	115.252	36.285		1073	145.395	44.405		1073	167.116	85.928		1073	70.038	161.449		1073	290.79	463.348		1073	116.582	153.722		1073	273.059	37.477		1073	75.357	138.924		1073	69.151
1074	90.872	33.332		1074	53.193	261.883		1074	92.645	153.866		1074	114.366	405.895		1074	115.252	37.188		1074	145.395	48.488		1074	167.116	86.987		1074	70.038	153.43		1074	290.79	459.544		1074	116.582	159.753		1074	273.059	37.547		1074	75.357	148.541		1074	69.151
1075	90.872	35.293		1075	53.193	272.575		1075	92.645	156.775		1075	114.366	404.14		1075	115.252	38.462		1075	145.395	44.924		1075	167.116	88.257		1075	70.038	157.184		1075	290.79	454.767		1075	116.582	157.106		1075	273.059	39.231		1075	75.357	144.259		1075	69.151
1076	90.872	33.176		1076	53.193	269.9		1076	92.645	156.545		1076	114.366	405.748		1076	115.252	37.031		1076	145.395	44.491		1076	167.116	84.385		1076	70.038	157.297		1076	290.79	465.986		1076	116.582	158.046		1076	273.059	39.206		1076	75.357	146.959		1076	69.151
1077	90.872	33.166		1077	53.193	267.425		1077	92.645	158.794		1077	114.366	412.357		1077	115.252	38.054		1077	145.395	43.207		1077	167.116	87.101		1077	70.038	156.07		1077	290.79	460.649		1077	116.582	155.958		1077	273.059	36.578		1077	75.357	144.729		1077	69.151
1078	90.872	34.576		1078	53.193	261.783		1078	92.645	157.837		1078	114.366	398.318		1078	115.252	38.769		1078	145.395	44.814		1078	167.116	86.032		1078	70.038	155.905		1078	290.79	455.32		1078	116.582	153.004		1078	273.059	38.122		1078	75.357	149.388		1078	69.151
1079	90.872	33.41		1079	53.193	272.083		1079	92.645	161.789		1079	114.366	398.95		1079	115.252	38.727		1079	145.395	46.405		1079	167.116	85.472		1079	70.038	153.127		1079	290.79	457.444		1079	116.582	160.221		1079	273.059	38.739		1079	75.357	146.918		1079	69.151
1080	90.872	31.512		1080	53.193	268.942		1080	92.645	157.167		1080	114.366	405.671		1080	115.252	37.865		1080	145.395	45.854		1080	167.116	88.716		1080	70.038	152.108		1080	290.79	454.463		1080	116.582	159.863		1080	273.059	38.802		1080	75.357	148.294		1080	69.151
1081	90.872	34.049		1081	53.193	274.967		1081	92.645	152.033		1081	114.366	396.907		1081	115.252	41.388		1081	145.395	45.052		1081	167.116	84.085		1081	70.038	160.108		1081	290.79	457.236		1081	116.582	149.825		1081	273.059	37.354		1081	75.357	146.671		1081	69.151
1082	90.872	32.966		1082	53.193	268.742		1082	92.645	159.627		1082	114.366	416.981		1082	115.252	39.108		1082	145.395	43.994		1082	167.116	84.162		1082	70.038	155.728		1082	290.79	451.14		1082	116.582	155.722		1082	273.059	37.578		1082	75.357	142.441		1082	69.151
1083	90.872	30.878		1083	53.193	278.883		1083	92.645	155.574		1083	114.366	404.957		1083	115.252	38.681		1083	145.395	44.665		1083	167.116	85.565		1083	70.038	156.81		1083	290.79	453.188		1083	116.582	155.278		1083	273.059	38.33		1083	75.357	148.624		1083	69.151
1084	90.872	32.951		1084	53.193	263.65		1084	92.645	148.459		1084	114.366	403.891		1084	115.252	38.785		1084	145.395	48.146		1084	167.116	88.422		1084	70.038	143.911		1084	290.79	462.073		1084	116.582	158.909		1084	273.059	39.055		1084	75.357	145.818		1084	69.151
1085	90.872	32.356		1085	53.193	273.092		1085	92.645	151.086		1085	114.366	412.422		1085	115.252	37.227		1085	145.395	45.396		1085	167.116	88.332		1085	70.038	151.392		1085	290.79	449.215		1085	116.582	155.662		1085	273.059	39.287		1085	75.357	141.547		1085	69.151
1086	90.872	34.044		1086	53.193	259.467		1086	92.645	144.359		1086	114.366	411.066		1086	115.252	39.592		1086	145.395	46.466		1086	167.116	88.318		1086	70.038	146.291		1086	290.79	464.491		1086	116.582	154.399		1086	273.059	37.925		1086	75.357	144.218		1086	69.151
1087	90.872	32.62		1087	53.193	259.8		1087	92.645	155.057		1087	114.366	401.326		1087	115.252	37.908		1087	145.395	46.851		1087	167.116	84.979		1087	70.038	146.108		1087	290.79	455.928		1087	116.582	160.989		1087	273.059	36.81		1087	75.357	147.253		1087	69.151
1088	90.872	31.083		1088	53.193	266.208		1088	92.645	153.502		1088	114.366	418.767		1088	115.252	37.777		1088	145.395	46.915		1088	167.116	87.897		1088	70.038	154.728		1088	290.79	450.227		1088	116.582	157.437		1088	273.059	38.308		1088	75.357	153.094		1088	69.151
1089	90.872	34.034		1089	53.193	258.692		1089	92.645	149.005		1089	114.366	406.671		1089	115.252	35.4		1089	145.395	46.192		1089	167.116	85.08		1089	70.038	139.69		1089	290.79	453.095		1089	116.582	159.061		1089	273.059	36.794		1089	75.357	151.041		1089	69.151
1090	90.872	33.483		1090	53.193	259.775		1090	92.645	151.732		1090	114.366	405.469		1090	115.252	35.204		1090	145.395	46.585		1090	167.116	86.414		1090	70.038	145.462		1090	290.79	456.451		1090	116.582	153.103		1090	273.059	38.308		1090	75.357	156.147		1090	69.151
1091	90.872	34.098		1091	53.193	272.667		1091	92.645	149.622		1091	114.366	414.519		1091	115.252	35.788		1091	145.395	47.683		1091	167.116	88.96		1091	70.038	144.709		1091	290.79	450.363		1091	116.582	154.517		1091	273.059	38.117		1091	75.357	150.535		1091	69.151
1092	90.872	32.805		1092	53.193	269.633		1092	92.645	153.986		1092	114.366	414.736		1092	115.252	38.212		1092	145.395	45.82		1092	167.116	81.743		1092	70.038	149.253		1092	290.79	454.351		1092	116.582	152.243		1092	273.059	38.369		1092	75.357	150.894		1092	69.151
1093	90.872	32.961		1093	53.193	248.15		1093	92.645	148.512		1093	114.366	407.504		1093	115.252	35.515		1093	145.395	46.582		1093	167.116	81.385		1093	70.038	141.949		1093	290.79	454.738		1093	116.582	153.103		1093	273.059	38.133		1093	75.357	146.306		1093	69.151
1094	90.872	33.171		1094	53.193	272.692		1094	92.645	145.263		1094	114.366	411.76		1094	115.252	36.488		1094	145.395	45.561		1094	167.116	84.027		1094	70.038	145.297		1094	290.79	452.985		1094	116.582	156.768		1094	273.059	37.438		1094	75.357	159.359		1094	69.151
1095	90.872	31.039		1095	53.193	263.192		1095	92.645	151.431		1095	114.366	414.419		1095	115.252	37.542		1095	145.395	46.485		1095	167.116	86.39		1095	70.038	147.968		1095	290.79	449.634		1095	116.582	157.205		1095	273.059	39.039		1095	75.357	141.241		1095	69.151
1096	90.872	33.429		1096	53.193	269.642		1096	92.645	146.651		1096	114.366	419.357		1096	115.252	35.273		1096	145.395	44.314		1096	167.116	87.822		1096	70.038	137.272		1096	290.79	442.822		1096	116.582	153.346		1096	273.059	38.745		1096	75.357	149.529		1096	69.151
1097	90.872	33.468		1097	53.193	272.4		1097	92.645	151.378		1097	114.366	418.109		1097	115.252	36.477		1097	145.395	46.787		1097	167.116	84.236		1097	70.038	151.228		1097	290.79	450.529		1097	116.582	153.095		1097	273.059	36.094		1097	75.357	144.865		1097	69.151
1098	90.872	31.805		1098	53.193	258.4		1098	92.645	141.019		1098	114.366	414.442		1098	115.252	39.254		1098	145.395	46.579		1098	167.116	85.263		1098	70.038	145.937		1098	290.79	439.309		1098	116.582	165.087		1098	273.059	38.05		1098	75.357	153.082		1098	69.151
1099	90.872	33.215		1099	53.193	260.217		1099	92.645	143.885		1099	114.366	403.841		1099	115.252	35.577		1099	145.395	46.436		1099	167.116	83.469		1099	70.038	144.975		1099	290.79	435.758		1099	116.582	158.741		1099	273.059	37.81		1099	75.357	148.247		1099	69.151
1100	90.872	34.093		1100	53.193	255.825		1100	92.645	146.813		1100	114.366	394.132		1100	115.252	37.862		1100	145.395	48.405		1100	167.116	84.353		1100	70.038	145.127		1100	290.79	438.053		1100	116.582	164.384		1100	273.059	36.627		1100	75.357	146.094		1100	69.151
1101	90.872	32.107		1101	53.193	254.858		1101	92.645	137.273		1101	114.366	390.93		1101	115.252	36.454		1101	145.395	45.125		1101	167.116	89.87		1101	70.038	144.291		1101	290.79	442.309		1101	116.582	156.738		1101	273.059	35.649		1101	75.357	154.788		1101	69.151
1102	90.872	34.761		1102	53.193	251.042		1102	92.645	143.445		1102	114.366	410.818		1102	115.252	36.042		1102	145.395	44.168		1102	167.116	86.549		1102	70.038	142		1102	290.79	446.244		1102	116.582	157.757		1102	273.059	37.49		1102	75.357	151.606		1102	69.151
1103	90.872	32.415		1103	53.193	259.392		1103	92.645	145.249		1103	114.366	398.186		1103	115.252	37.265		1103	145.395	43.741		1103	167.116	89.324		1103	70.038	133.101		1103	290.79	453.558		1103	116.582	164.369		1103	273.059	36.948		1103	75.357	145.229		1103	69.151
1104	90.872	34.454		1104	53.193	265.6		1104	92.645	141.105		1104	114.366	405.903		1104	115.252	37.142		1104	145.395	45.723		1104	167.116	86.666		1104	70.038	148.519		1104	290.79	459.884		1104	116.582	158.046		1104	273.059	38.583		1104	75.357	148.582		1104	69.151
1105	90.872	31.78		1105	53.193	262.4		1105	92.645	142.196		1105	114.366	405.814		1105	115.252	36.185		1105	145.395	44.485		1105	167.116	85.753		1105	70.038	145.475		1105	290.79	457.593		1105	116.582	163.563		1105	273.059	36.354		1105	75.357	155.629		1105	69.151
1106	90.872	33.824		1106	53.193	265.933		1106	92.645	132.096		1106	114.366	403.225		1106	115.252	36.65		1106	145.395	43.939		1106	167.116	86.058		1106	70.038	143.633		1106	290.79	447.756		1106	116.582	159.939		1106	273.059	35.537		1106	75.357	141.418		1106	69.151
1107	90.872	33.307		1107	53.193	253.658		1107	92.645	129.675		1107	114.366	409.756		1107	115.252	40.088		1107	145.395	45.073		1107	167.116	85.488		1107	70.038	135.778		1107	290.79	446.928		1107	116.582	154.601		1107	273.059	37.247		1107	75.357	143.676		1107	69.151
1108	90.872	33.283		1108	53.193	262.9		1108	92.645	131.464		1108	114.366	402.186		1108	115.252	38.4		1108	145.395	45.829		1108	167.116	88.263		1108	70.038	136.823		1108	290.79	453.636		1108	116.582	157.095		1108	273.059	37.891		1108	75.357	141.776		1108	69.151
1109	90.872	32.132		1109	53.193	258.808		1109	92.645	131.55		1109	114.366	404		1109	115.252	38.588		1109	145.395	46.82		1109	167.116	88.157		1109	70.038	137.646		1109	290.79	450.854		1109	116.582	157.213		1109	273.059	39.123		1109	75.357	151.859		1109	69.151
1110	90.872	34.141		1110	53.193	261.667		1110	92.645	134.837		1110	114.366	398.012		1110	115.252	35.385		1110	145.395	42.948		1110	167.116	89.727		1110	70.038	143.222		1110	290.79	444.884		1110	116.582	164.008		1110	273.059	38.12		1110	75.357	146.671		1110	69.151
1111	90.872	32.005		1111	53.193	270.6		1111	92.645	138.828		1111	114.366	404.636		1111	115.252	37.677		1111	145.395	43.665		1111	167.116	86.846		1111	70.038	144.241		1111	290.79	438.784		1111	116.582	158.156		1111	273.059	38.756		1111	75.357	149.912		1111	69.151
1112	90.872	31.024		1112	53.193	259.55		1112	92.645	135.234		1112	114.366	401.729		1112	115.252	36.442		1112	145.395	43.741		1112	167.116	88.39		1112	70.038	142.278		1112	290.79	453.221		1112	116.582	166.395		1112	273.059	38.961		1112	75.357	148.141		1112	69.151
1113	90.872	31.922		1113	53.193	249.883		1113	92.645	136.531		1113	114.366	399.822		1113	115.252	38.05		1113	145.395	44.287		1113	167.116	89.714		1113	70.038	140.962		1113	290.79	446.087		1113	116.582	163.487		1113	273.059	38.226		1113	75.357	147.476		1113	69.151
1114	90.872	34.024		1114	53.193	244.533		1114	92.645	134.368		1114	114.366	400.252		1114	115.252	38.05		1114	145.395	46.689		1114	167.116	87.151		1114	70.038	140.449		1114	290.79	447.796		1114	116.582	162.335		1114	273.059	37.578		1114	75.357	148.053		1114	69.151
1115	90.872	32.859		1115	53.193	259.65		1115	92.645	139.794		1115	114.366	411.717		1115	115.252	36.062		1115	145.395	43.366		1115	167.116	88.05		1115	70.038	147.494		1115	290.79	448.954		1115	116.582	158.475		1115	273.059	38.534		1115	75.357	150.782		1115	69.151
1116	90.872	32.663		1116	53.193	248.625		1116	92.645	132.206		1116	114.366	405.806		1116	115.252	35.927		1116	145.395	45.012		1116	167.116	88.294		1116	70.038	141.627		1116	290.79	440.05		1116	116.582	160.814		1116	273.059	38.141		1116	75.357	146.712		1116	69.151
1117	90.872	34.81		1117	53.193	255.158		1117	92.645	134.45		1117	114.366	398.012		1117	115.252	37.323		1117	145.395	43.552		1117	167.116	89.395		1117	70.038	145.234		1117	290.79	455.744		1117	116.582	158.3		1117	273.059	37.252		1117	75.357	146.118		1117	69.151
1118	90.872	33.18		1118	53.193	254.975		1118	92.645	131.746		1118	114.366	404.081		1118	115.252	36.927		1118	145.395	44.643		1118	167.116	89.613		1118	70.038	152.101		1118	290.79	445.62		1118	116.582	160.517		1118	273.059	37.732		1118	75.357	150.465		1118	69.151
1119	90.872	33.376		1119	53.193	260.717		1119	92.645	132.967		1119	114.366	397.422		1119	115.252	36.681		1119	145.395	45.604		1119	167.116	85.499		1119	70.038	142.873		1119	290.79	438.081		1119	116.582	160.354		1119	273.059	37.058		1119	75.357	146.376		1119	69.151
1120	90.872	34.673		1120	53.193	253.658		1120	92.645	134.641		1120	114.366	404.372		1120	115.252	35.677		1120	145.395	44.674		1120	167.116	87.504		1120	70.038	142.835		1120	290.79	430.445		1120	116.582	162.304		1120	273.059	38.669		1120	75.357	144.606		1120	69.151
1121	90.872	33.151		1121	53.193	258.375		1121	92.645	131.196		1121	114.366	397.764		1121	115.252	35.896		1121	145.395	41.43		1121	167.116	88.493		1121	70.038	153.316		1121	290.79	435.18		1121	116.582	167.726		1121	273.059	37.906		1121	75.357	146.641		1121	69.151
1122	90.872	33.156		1122	53.193	254.425		1122	92.645	126.541		1122	114.366	402.946		1122	115.252	37.469		1122	145.395	43.076		1122	167.116	85.077		1122	70.038	143.506		1122	290.79	436.444		1122	116.582	157.886		1122	273.059	37.696		1122	75.357	142.724		1122	69.151
1123	90.872	30.556		1123	53.193	260.2		1123	92.645	135.66		1123	114.366	407.205		1123	115.252	38.488		1123	145.395	42.457		1123	167.116	87.989		1123	70.038	144.975		1123	290.79	445.125		1123	116.582	157.281		1123	273.059	37.193		1123	75.357	147.7		1123	69.151
1124	90.872	31.702		1124	53.193	265.733		1124	92.645	131.933		1124	114.366	395.333		1124	115.252	35.35		1124	145.395	41.524		1124	167.116	89.533		1124	70.038	140.918		1124	290.79	437.296		1124	116.582	157.54		1124	273.059	37.289		1124	75.357	144.812		1124	69.151
1125	90.872	31.463		1125	53.193	256.383		1125	92.645	134.148		1125	114.366	403		1125	115.252	37.335		1125	145.395	42.686		1125	167.116	89.759		1125	70.038	147.171		1125	290.79	440.168		1125	116.582	168.563		1125	273.059	36.787		1125	75.357	145.8		1125	69.151
1126	90.872	32.659		1126	53.193	259.775		1126	92.645	137.311		1126	114.366	405.624		1126	115.252	37.104		1126	145.395	43.671		1126	167.116	88.607		1126	70.038	145.93		1126	290.79	448.41		1126	116.582	161.51		1126	273.059	38.144		1126	75.357	162.165		1126	69.151
1127	90.872	33.527		1127	53.193	262.375		1127	92.645	128.809		1127	114.366	397.919		1127	115.252	36.977		1127	145.395	42.091		1127	167.116	88.072		1127	70.038	144.177		1127	290.79	444.387		1127	116.582	158.973		1127	273.059	37.638		1127	75.357	147.088		1127	69.151
1128	90.872	32.81		1128	53.193	245.517		1128	92.645	139.215		1128	114.366	395.136		1128	115.252	37.508		1128	145.395	42.912		1128	167.116	84.751		1128	70.038	151.146		1128	290.79	453.736		1128	116.582	165.198		1128	273.059	37.779		1128	75.357	156.447		1128	69.151
1129	90.872	31.868		1129	53.193	256.533		1129	92.645	143.474		1129	114.366	397.194		1129	115.252	37.592		1129	145.395	40.857		1129	167.116	88.865		1129	70.038	147.652		1129	290.79	442.537		1129	116.582	159.677		1129	273.059	36.831		1129	75.357	145.576		1129	69.151
1130	90.872	33.644		1130	53.193	258.75		1130	92.645	135.426		1130	114.366	411.713		1130	115.252	36.392		1130	145.395	40.686		1130	167.116	90.016		1130	70.038	148.392		1130	290.79	439.782		1130	116.582	161.418		1130	273.059	37.307		1130	75.357	141.835		1130	69.151
1131	90.872	35.668		1131	53.193	255.542		1131	92.645	134.785		1131	114.366	404.372		1131	115.252	37.569		1131	145.395	40.412		1131	167.116	91.18		1131	70.038	151.538		1131	290.79	444.355		1131	116.582	153.236		1131	273.059	38.244		1131	75.357	150.024		1131	69.151
1132	90.872	31.444		1132	53.193	252.183		1132	92.645	121.651		1132	114.366	400.19		1132	115.252	36.235		1132	145.395	43.689		1132	167.116	91.615		1132	70.038	153.937		1132	290.79	434.399		1132	116.582	158.361		1132	273.059	36.935		1132	75.357	156.565		1132	69.151
1133	90.872	32.971		1133	53.193	251.925		1133	92.645	131.029		1133	114.366	391.744		1133	115.252	38.077		1133	145.395	42.588		1133	167.116	89.459		1133	70.038	146.348		1133	290.79	442.849		1133	116.582	162.266		1133	273.059	36.196		1133	75.357	147.447		1133	69.151
1134	90.872	34.39		1134	53.193	265.275		1134	92.645	131.785		1134	114.366	389.547		1134	115.252	35.65		1134	145.395	44.479		1134	167.116	91.875		1134	70.038	152.658		1134	290.79	437.907		1134	116.582	160.665		1134	273.059	37.606		1134	75.357	148.265		1134	69.151
1135	90.872	32.054		1135	53.193	260.475		1135	92.645	128.737		1135	114.366	392.767		1135	115.252	36.719		1135	145.395	43.75		1135	167.116	87.544		1135	70.038	146.677		1135	290.79	438.649		1135	116.582	165.665		1135	273.059	36.674		1135	75.357	147.724		1135	69.151
1136	90.872	33.434		1136	53.193	262.325		1136	92.645	133.139		1136	114.366	379.733		1136	115.252	35.677		1136	145.395	45.107		1136	167.116	89.204		1136	70.038	150.646		1136	290.79	432.784		1136	116.582	164.232		1136	273.059	37.68		1136	75.357	151.241		1136	69.151
1137	90.872	35.62		1137	53.193	264.133		1137	92.645	132.249		1137	114.366	388.721		1137	115.252	36.996		1137	145.395	47.637		1137	167.116	89.979		1137	70.038	149.285		1137	290.79	441.68		1137	116.582	163.38		1137	273.059	36.872		1137	75.357	143.647		1137	69.151
1138	90.872	31.898		1138	53.193	258.458		1138	92.645	128.493		1138	114.366	382.961		1138	115.252	36.481		1138	145.395	45.085		1138	167.116	89.037		1138	70.038	157.766		1138	290.79	436.814		1138	116.582	165.262		1138	273.059	36.398		1138	75.357	152.271		1138	69.151
1139	90.872	32.454		1139	53.193	262.342		1139	92.645	135.316		1139	114.366	386.833		1139	115.252	36.123		1139	145.395	44.957		1139	167.116	88.846		1139	70.038	151.177		1139	290.79	433.569		1139	116.582	165.156		1139	273.059	37.073		1139	75.357	144.647		1139	69.151
1140	90.872	33.99		1140	53.193	255.275		1140	92.645	132.598		1140	114.366	394.186		1140	115.252	36.654		1140	145.395	43.067		1140	167.116	89.186		1140	70.038	153.076		1140	290.79	440.245		1140	116.582	166.395		1140	273.059	37.281		1140	75.357	142.941		1140	69.151
1141	90.872	31.961		1141	53.193	265.8		1141	92.645	130.048		1141	114.366	402.395		1141	115.252	35.846		1141	145.395	42.149		1141	167.116	87.809		1141	70.038	151.234		1141	290.79	425.688		1141	116.582	160.338		1141	273.059	38.997		1141	75.357	145.141		1141	69.151
1142	90.872	31.112		1142	53.193	264.625		1142	92.645	132.981		1142	114.366	394.899		1142	115.252	35.315		1142	145.395	45.829		1142	167.116	87.581		1142	70.038	159.968		1142	290.79	434.274		1142	116.582	161.51		1142	273.059	38.26		1142	75.357	147.306		1142	69.151
1143	90.872	32.629		1143	53.193	269.35		1143	92.645	130.153		1143	114.366	414.233		1143	115.252	38.046		1143	145.395	42.631		1143	167.116	89.976		1143	70.038	154.658		1143	290.79	432.027		1143	116.582	162.646		1143	273.059	36.506		1143	75.357	139.747		1143	69.151
1144	90.872	33.439		1144	53.193	250.717		1144	92.645	135.699		1144	114.366	401.233		1144	115.252	38.896		1144	145.395	44.579		1144	167.116	88.366		1144	70.038	148.987		1144	290.79	432.591		1144	116.582	155.129		1144	273.059	37.242		1144	75.357	145.041		1144	69.151
1145	90.872	33.22		1145	53.193	264.983		1145	92.645	133.971		1145	114.366	406.655		1145	115.252	35.396		1145	145.395	42.701		1145	167.116	89.549		1145	70.038	155.722		1145	290.79	422.465		1145	116.582	166.038		1145	273.059	36.62		1145	75.357	147.706		1145	69.151
1146	90.872	34.327		1146	53.193	257.892		1146	92.645	138.048		1146	114.366	325.636		1146	115.252	36.838		1146	145.395	47.104		1146	167.116	88.541		1146	70.038	150.082		1146	290.79	424.837		1146	116.582	165.597		1146	273.059	38.729		1146	75.357	141.865		1146	69.151
1147	90.872	32.473		1147	53.193	256.775		1147	92.645	134.823		1147	114.366	407.155		1147	115.252	38.927		1147	145.395	43.82		1147	167.116	93.358		1147	70.038	155.19		1147	290.79	422.579		1147	116.582	162.354		1147	273.059	36.695		1147	75.357	141.047		1147	69.151
1148	90.872	33.883		1148	53.193	260.65		1148	92.645	133.9		1148	114.366	382.399		1148	115.252	35.554		1148	145.395	42.777		1148	167.116	94.751		1148	70.038	156.335		1148	290.79	427.517		1148	116.582	163.89		1148	273.059	38.399		1148	75.357	142.006		1148	69.151
1149	90.872	31.263		1149	53.193	264.675		1149	92.645	135.096		1149	114.366	389.457		1149	115.252	35.5		1149	145.395	44.299		1149	167.116	89.387		1149	70.038	158.962		1149	290.79	424.139		1149	116.582	164.817		1149	273.059	37.127		1149	75.357	145.953		1149	69.151
1150	90.872	32.624		1150	53.193	258.542		1150	92.645	146.656		1150	114.366	367.942		1150	115.252	36.327		1150	145.395	45.143		1150	167.116	94.52		1150	70.038	162.671		1150	290.79	415.777		1150	116.582	160.183		1150	273.059	37.705		1150	75.357	146.818		1150	69.151
[truncated: 13 more columns]

## Sheet: F0 values
35.3848	348.396	424.668	523.849	62.6817	71.9184	122.203	283.341	611.666	305.866	50.5246	237.677	162.874	119.224	389.621	176.707	979.961

## Sheet: DeltaF values
0.108387	0.112479	0.127241	0.188364	0.103066	0.0730352	0.0750467	0.0595999	0.042463	0.120957	0.0839482	0.122162	0.189177	0.231017	-0.0251223	0.0936184	0.0601713
0.0390347	0.0388328	0.105542	0.153079	0.0684623	0.016054	0.103982	0.10108	0.0437529	0.0958839	0.127709	0.0827343	0.159897	0.224777	-0.0184261	0.104937	0.112465
0.0273064	0.0454832	0.100493	0.162758	0.048281	0.0910417	0.0604808	0.0647598	0.0235736	0.110142	0.076051	0.107705	0.143718	0.235379	0.00757353	0.0650513	0.0656001
0.050339	0.0712901	0.0882697	0.145384	0.0302374	-0.00136855	0.0658898	0.0230538	0.041809	0.112443	0.0984362	0.0817708	0.157177	0.236804	-0.0233924	0.085673	0.0423063
0.0329586	0.0605035	0.114184	0.1415	0.0191337	0.0432653	0.0547772	0.0496825	0.0255207	0.113771	0.0800293	0.107213	0.111798	0.206249	0.0111642	0.0738682	0.0390541
0.144899	0.040532	0.105372	0.11106	0.0485841	0.00609824	0.088377	0.0209115	0.0324788	0.0993037	0.0707467	0.0606581	0.0877917	0.142721	-0.0498386	0.0162983	0.0314008
-0.0345846	0.0593554	0.0871535	0.102987	0.0566886	0.057309	0.0589587	0.0453273	0.00612943	0.0774248	0.061563	0.0464792	0.10133	0.131281	-0.0473105	0.0497039	0.0194146
0.0565281	0.0243378	0.110511	0.104563	0.0250844	0.0119382	0.0736147	0.00987535	0.026366	0.080194	0.0426613	0.00769545	0.126325	0.15079	-0.0749091	0.0695107	0.00403234
0.0137978	0.0539506	0.07671	0.0854892	0.0491425	0.0382736	0.0688848	0.0285737	0.020142	0.0645957	0.0571295	0.0418006	0.0824011	0.138695	-0.0109316	0.0449729	0.0234004
0.107539	0.010081	0.0952092	0.110741	0.084416	0.0422086	0.0794738	0.0314748	0.00943842	0.0794617	0.0147739	0.0245503	0.0901125	0.165217	-0.0678048	0.0795273	0.0212922
-0.0461715	0.0453139	0.0656002	0.0990657	0.0572948	-0.0156069	0.0768879	0.0503743	0.00837412	0.0542023	0.0495689	0.0564507	0.0942875	0.142923	-0.0730124	0.0236438	0.0246729
0.0547476	0.0561263	0.0691394	0.0939821	0.0757691	0.060229	0.0530833	0.0254467	0.0073327	0.0689701	0.0138832	0.0101441	0.0372189	0.134795	-0.0130876	0.0189637	0.0304824
-0.0221781	0.0152475	0.065838	0.0864876	0.0450265	0.0587412	0.0356287	0.0309171	0.00447166	0.0787783	0.00851951	0.0778116	0.146236	0.141681	-0.0690137	-0.0754468	0.0272037
0.0672954	-0.00919594	0.0430673	0.0734571	-0.00628041	0.0471308	0.0552518	0.0580364	-0.0153611	0.0783795	0.0072528	0.0335078	0.105978	0.15703	-0.0476827	-0.00149954	0.0247138
0.0619259	-0.000728563	0.0640907	0.0519929	0.0530671	0.0697676	0.0279202	0.00190262	-0.0119164	0.061202	0.0296775	0.0186094	0.0360769	0.119379	-0.038253	0.034413	0.0510485
0.00814566	0.0185024	0.0561481	0.0553966	0.065144	0.0152058	0.0260545	0.0249526	-0.0311017	0.0308424	-0.0494919	0.0605108	0.110226	0.0885627	-0.0505445	0.00769647	0.0273873
0.0342021	-0.0200084	0.0171646	0.0662432	0.000659417	0.0587829	0.0714216	0.0229868	-0.0249791	0.0442208	0.0591088	0.0220006	0.091494	0.103644	-0.0492997	0.0199937	0.0277414
-0.00177386	0.0160369	0.00159247	0.0358776	-0.013635	-0.0159128	0.0328547	-0.00821593	-0.0344614	0.0360538	-0.0170918	0.0210329	0.0263577	0.0578055	-0.0331378	-0.0240793	0.0372857
0.0690758	-0.00386293	0.044499	0.0649566	0.0222606	-0.0124784	0.0684675	0.00737306	-0.0297889	0.0483206	0.014477	0.0116294	0.0742537	0.0313428	-0.0447619	-0.0442653	-0.016696
-0.0282542	-0.00410116	0.0267533	0.0370917	0.0484565	-0.0267167	0.0250562	0.0271655	-0.0341278	0.0430634	-0.00482054	-0.00250327	0.0425727	0.0413575	-0.0482961	-0.0175487	0.035007
-0.00177386	-0.0285245	0.0188554	0.0249202	0.0491904	0.0171107	0.0412914	0.0137188	-0.032202	0.0286192	-0.0257411	0.0690981	0.0447769	0.0797809	-0.0272038	-0.0324604	0.00921621
-0.0340476	-0.0496442	0.0194182	0.0457125	0.0195007	0.00494415	0.0744412	0.0065472	-0.0209785	0.048422	-0.0175866	0.0307099	0.0324974	0.0509194	-0.0803221	0.0332189	0.0287956
0.00871088	0.0352937	-0.00864847	0.0475909	0.0233614	0.023048	0.017855	0.0169128	-0.0165872	0.0529599	-0.0362706	0.0906568	0.0165158	0.0256896	-0.0244139	-0.0465515	0.00692429
0.0197326	-0.000682638	-0.00871441	0.0356122	0.00354702	-0.0270504	-0.0129052	0.0221609	-0.0177643	0.0716053	-0.0501846	0.0258377	0.047331	0.00364706	-0.0351834	-0.0222288	0.0193738
0.0191674	0.0310112	-0.0104405	0.0551751	0.0364913	-0.0152315	0.0352196	0.0391157	-0.00384007	0.0205013	-0.0462657	0.00499851	0.0135257	0.00305993	-0.0567582	-0.0156982	0.00946112
0.0325629	-0.00685378	-0.00139103	0.0349021	0.0284028	0.0505236	0.0424207	0.0344041	-0.00166241	0.0215082	-0.0146573	0.0271967	-0.00383124	0.0207493	-0.0405399	-0.0176562	0.0110938
-0.00355429	0.0590913	-0.0114201	0.0216139	-0.00259512	0.00872622	0.0448347	0.058347	-0.0111055	0.0482846	0.00420478	0.0274449	0.00789561	0.00956029	-0.0172172	-0.00470825	0.023578
0.0120174	0.0400297	-0.00471599	0.0156713	0.00311628	0.00080057	0.0195653	0.080797	-0.0202788	0.0145967	-0.0192492	0.0285599	-0.0152818	0.00579428	-0.00659664	0.0797989	0.0201217
-0.00799123	0.0224491	-0.0196335	0.0161677	0.0711585	-0.00560947	-0.00650606	0.0517825	-0.0247861	0.0495139	-0.0130146	0.0150962	0.0069501	0.0821295	-0.0216241	0.0110184	-0.0143898
0.0191674	-0.00682795	0.000612886	0.0408504	0.0214629	-0.0341835	-0.0155566	0.0561376	-0.0211502	0.0193831	-0.0240785	0.0205659	-0.0120155	-0.0156611	0.00910066	-0.0237001	-0.0012393
-0.0279716	0.0326128	0.00779026	-0.00367775	-0.0377569	-0.0044971	0.027732	0.0991141	-0.0138357	0.0129064	-0.040902	0.0746897	0.0171052	0.0572268	-0.0227405	-0.0208706	-0.0217095
-0.0430063	0.00276172	0.0182243	0.0258079	-0.0130288	0.0154561	-0.00548317	0.0921226	-0.0219611	0.0525479	-0.0225545	0.0222951	-0.0557855	-0.0302974	-0.0225557	0.000407569	0.00287617
-0.00344125	0.0474437	0.0272031	0.0383058	-0.0201441	-0.0291778	0.0423389	0.0465767	-0.00827059	0.0324346	0.00404644	0.0212348	-0.0161905	-0.0131952	-0.0256048	0.0065024	-0.0183287
-0.126262	0.0191942	0.0220885	0.0134741	-0.0472015	-0.0325289	-0.0058105	0.022588	0.00352179	0.0337914	-0.0418125	0.0874381	-1.23414e-05	0.0321899	-0.0591759	0.0147703	0.00427112
0.0137978	0.019243	0.03901	0.0280948	-0.0245633	0.0203366	0.0164394	0.0806205	-0.0110319	0.0134034	-0.0393582	0.0394739	-0.0159142	0.0156748	-0.0469923	0.000786727	0.019686
0.0216543	-0.00936529	0.0355861	-0.0099372	-0.0209418	-0.00217502	0.0124869	0.0317218	-0.00238176	0.0253727	0.00895494	0.0177932	0.0154904	0.0562455	-0.0498771	0.00971111	0.00566505
0.00608263	0.000465481	0.0269323	0.00811764	-0.0509506	-0.0195141	0.00170159	0.0272784	-0.00095941	0.0239832	-0.015548	0.023957	-0.0468092	0.00169276	-0.053727	-0.0365406	-0.00532823
-0.0631279	0.00328985	0.015846	0.00904157	-0.000935946	-0.0338359	0.0276666	0.0570306	-0.0136117	0.0111017	-0.0281557	0.00786795	0.00120946	0.0364173	-0.021737	-0.0731096	0.000672001
0.0668715	0.0287638	-0.00485021	0.00547566	0.0573586	-0.0164551	-0.0456786	0.022588	0.00199645	-0.00822697	-0.0161616	0.0127191	-0.0140661	0.0728948	0.0085976	-0.0511807	-0.0211044
0.0273064	-0.0196496	-0.0172222	-0.00281109	-0.0268925	-0.0321812	0.0174868	0.0834793	-0.00370764	0.0038927	-0.0166762	0.0418973	-0.0412589	0.03375	-0.0371725	-0.011618	-0.000613764
0.0109152	-0.00962649	-0.0371649	0.00286421	0.00391396	0.039664	0.0302279	0.0360099	-0.00790928	-0.0104665	-0.057013	0.0304658	0.00309435	0.0215881	-0.000552311	-0.0629289	-0.0104376
0.0536455	-0.0363203	-0.0394961	0.0109582	0.000228669	0.0204617	-0.00797902	-0.00560424	-0.0190281	-0.0167176	-0.020694	0.035561	-1.23414e-05	-0.0448582	-0.0383814	-0.0553684	-0.03586
-0.0345846	-0.0346469	0.00495039	0.0118382	0.0273498	-0.0175118	-0.015663	0.0154623	0.00848365	-0.0318974	-0.00941236	0.0551885	-0.0004851	0.0503322	-0.0267034	-0.0396984	-0.00879776
-0.0237042	0.0178796	0.00516468	-0.00372929	-0.026031	0.00121771	-0.000426017	0.0456379	0.0127736	-0.0216152	-0.0216638	0.0909261	-0.0233924	-0.00311331	-0.0102232	0.0494888	-0.0027363
-0.00479776	0.00276172	-0.0368823	0.0346654	0.00710468	-0.000770654	0.0111858	-0.0037937	0.00066566	-0.0451974	-0.0500065	0.0222951	-0.057081	-0.0624134	0.000543626	-0.00797354	-0.0273087
0.0315738	-0.0201748	-0.0220896	-0.03206	0.00833311	-0.00107656	0.0227976	-0.0203921	0.00643515	-0.0340226	-0.0107582	0.0377657	-0.0773114	0.0378431	-0.0332122	-0.0671223	-0.0134918
0.01035	-0.00080032	-0.0445777	-0.00679888	-0.00173363	0.0122024	-0.00715253	-0.0127723	0.00563079	-0.0228085	0.00877681	0.0229893	-0.00733702	-0.105458	-0.0290261	0.0670659	-0.0151317
-0.0533215	-0.00836069	-0.0369176	-0.0131251	0.0217661	-0.0260354	0.000465941	-0.00627481	-0.00293598	-0.000321557	-0.026889	0.0409086	-0.0391714	-0.012608	-0.0209003	-0.034526	-0.00270262
-0.0213586	-0.0136937	-0.026314	-0.0217899	-0.0161557	0.0158037	0.0122087	0.00400257	-0.00689075	-0.0121306	-0.0268296	0.0235363	-0.0126479	-0.0467454	-0.0247296	0.0284823	-0.0134377
-0.0298933	-0.0256772	-0.0488375	-0.0577487	-0.0351086	-0.0116302	0.0344585	0.0271443	-0.0229453	-0.0405123	-0.0356966	-0.00106434	-0.0640496	-0.0236628	0.00963964	-0.0221778	-0.00536191
-0.0246651	-0.028714	-0.0300558	-0.0683434	-0.0506315	-0.0446954	0.0140499	-0.00202904	-0.0228325	-0.000720424	0.0059663	-0.00413574	-0.070662	-0.0952507	0.00889533	-0.0733813	-0.00532109
-0.0435432	-0.0106081	-0.020128	-0.0741905	-0.0465793	0.0527205	0.0538607	-0.0476878	-0.00770329	0.00159431	-0.00909569	0.0152183	-0.0184315	-0.0486326	0.0299311	0.00617418	-0.0221381
-0.0471324	-0.0108464	-0.0348996	-0.0763953	0.0222606	0.0116045	0.0170449	-0.0733071	0.0215251	-0.0297102	-0.0296204	0.00410654	-0.0357516	-0.0375778	0.0144186	0.0412718	-0.0168664
-0.0298933	-0.0138143	-0.0184043	-0.089987	-0.0186126	-0.0119639	0.0116686	-0.139919	0.00342207	-0.0029567	-0.0192096	0.014848	-0.0391714	-0.0425852	-0.00918377	0.0416001	-0.0366764
-0.0533215	-0.00577742	-0.03019	-0.152923	-0.010205	-0.00467786	0.0370199	-0.00806064	-0.00558775	0.00164335	-0.0141032	0.00893242	-0.0642031	-0.0490184	-0.0573896	-0.00840929	-0.012553
-0.0110151	-0.00692554	0.0111246	-0.129134	0.0253237	0.0267327	-0.00313462	-0.051263	0.0100172	0.00249994	0.0141603	-0.00242754	-0.023945	-0.0448582	-0.052685	-0.00465165	-0.0278393
-0.0137564	-0.0153212	-0.0312379	-0.137045	-0.0481746	-0.0164551	-3.32283e-05	-0.000109088	-0.00665043	-0.000458872	-0.0314215	0.00727471	-0.0513772	-0.0979766	-0.0281535	-0.0142325	-0.0153827
-0.0576171	0.0260111	0.0193499	-0.0952481	0.054471	-0.00217502	0.016423	0.0115518	-0.000880936	0.00181663	0.0105977	0.0023731	-0.100845	-0.0435581	-0.013701	0.032455	-0.0288261
-0.00674775	-0.0131914	-0.013132	-0.0733754	-0.0316148	0.0408598	0.0145736	0.005319	-0.00375015	-0.0124674	-0.0146573	-0.0136655	-0.0135136	-0.0322433	-0.0172531	-0.0430712	-0.0248321
-0.0301759	0.00725948	-0.0325001	-0.0345684	-0.0409476	0.0095744	0.00576041	-0.022245	-0.00294579	-0.0146546	-0.0112135	-0.0537072	-0.0547602	-0.0423839	-0.031295	0.0163492	-0.0453778
-0.0460302	-0.0175686	0.00518823	-0.0299143	0.0216384	-0.0474485	-0.0231259	-0.0074783	-0.00485696	-0.0210201	0.00224533	-0.0189584	-0.00154727	-0.0348435	-0.0225557	0.00742484	-0.0199615
-0.000247781	-0.0125456	0.00302418	-0.024157	-0.0134595	0.00771118	-0.0213257	-0.00571364	0.00610817	-0.0198137	0.00535273	-0.00908363	-0.0559022	-0.0866031	-0.023336	-0.0542818	-0.028819
-0.0463128	-0.00156669	-0.00332902	-0.04116	-0.0582414	-0.026967	-0.00869095	-0.0227144	-0.00281009	-0.030217	0.0194251	-0.0265317	-0.0823091	-0.0771084	-0.0357044	0.0402362	-0.021084
0.0267695	0.0233102	0.0180218	-0.0743738	-0.0468983	-0.0130624	-0.0165058	-0.0331223	0.00800463	-0.0512261	-0.00385071	-0.0204436	-0.0786068	-0.0644935	0.00232998	0.0156984	-0.0151378
0.0688215	0.0468926	-0.0145755	-0.0750629	5.31788e-05	-0.0056929	-0.0354988	-0.0119711	0.00137847	-0.0538122	0.0125176	-0.0629635	-0.0682983	-0.0452524	-0.00377082	0.0306045	-0.0409286
-0.0228564	0.0274721	0.0159025	-0.100293	-0.0124704	-0.0249786	0.00211893	-0.0387304	0.000157213	-0.0202355	-0.0361914	-0.0582133	-0.0414554	-0.00513471	-0.00786197	-0.00813765	-0.0065191
0.0204108	-0.00190251	0.00913013	-0.081351	-0.0350448	0.0169439	-0.0316609	-0.0822892	-0.00157412	-0.0305929	0.000444228	-0.00759842	-0.0327984	-0.040245	0.0167799	-0.0152115	-0.0298465
-0.000530389	0.021588	-0.0116108	-0.0646228	0.00115398	-0.00534528	-0.00276638	-0.0162134	-0.0192096	-0.00354192	0.0115873	-0.0539555	-0.0154414	0.0097616	-0.0147251	0.0307686	-0.0270301
-0.00149125	-0.00611037	-0.011161	-0.0399917	-0.0162195	-0.0461276	-0.0581414	-0.0866444	-0.0120799	-0.0244759	0.0347048	-0.081354	-0.0304346	-0.00363334	-0.0323935	0.0262017	-0.0266832
-0.0366476	0.0113984	-0.0194758	-0.043653	-0.0584328	0.0222415	-0.018527	-0.0673673	-0.000300554	-0.0241653	0.0519835	-0.0287111	-0.0256334	-0.0739211	0.00437555	0.0540048	-0.021683
-0.0411976	0.00185471	-0.00883921	-0.0526652	-0.0333378	0.0172498	-0.0352369	-0.0430856	0.00104005	-0.0102671	-0.0108374	-0.0103963	-0.0402336	-0.0958965	0.0087285	-0.00383675	-0.0453502
0.0390347	0.0176643	-0.0394184	-0.0757883	0.0355819	-0.00242531	-0.0455313	-0.0715884	-0.00681391	0.00171855	-0.0187741	-0.0204436	-0.0307907	-0.0795156	0.0790481	-0.0027502	-0.0205941
0.0022109	-0.0092677	-0.0200174	-0.0704967	-0.0151666	-0.0133265	-0.0545572	-0.064618	-0.0127093	-0.00470909	0.042404	-0.0298261	-0.0381891	0.0276355	0.0306549	0.0260376	-0.0414797
-0.0483758	-0.00773783	0.0165901	-0.0504088	-0.0247388	-0.00896049	-0.0173323	-0.096763	-0.00892618	-0.022972	-0.00691853	-0.0165097	-0.0362244	-0.111179	0.061585	0.0345262	-0.0405949
0.0495194	-0.0137655	-0.0229797	-0.0379567	-0.0405169	0.0158871	-0.017185	-0.0352011	-0.00475887	-0.00917183	-0.0121437	-0.0652649	-0.0632207	-0.0808828	0.0633893	0.0361051	-0.00961412
0.0125543	-0.0108004	-0.017267	-0.0182526	-0.0109389	-0.0652048	-0.0211538	-0.026646	0.00496212	-0.0177507	-0.00408822	-0.0232163	-0.0316933	-0.115079	0.0540905	0.0199427	-0.00489965
0.00181525	-0.0515099	-0.0325118	-0.0371493	-0.00798745	-0.020696	-0.0301389	-0.0660261	-0.00242753	-0.0284907	0.0334183	-0.0341302	-0.0758562	-0.0645606	0.0744359	0.0338188	0.00044036
-0.141015	-0.0203901	-0.041785	-0.0623436	-0.0544444	0.0305565	-0.0606373	-0.0365846	0.00275667	-0.0556268	-0.00600808	-0.0390318	-0.0424378	-0.0362106	0.0667002	0.00584595	0.00899886
0.0371129	-0.046151	-0.0451311	-0.0364315	-0.0760456	0.0269135	-0.0471352	-0.0143146	0.00513215	-0.0191173	0.00137447	-0.0306171	-0.0716812	-0.0760683	0.077598	0.00209398	0.00899172
-0.00273473	-0.00852716	-0.0264035	-0.0258368	-0.0432769	0.00618167	-0.0357852	-0.0371457	0.000526695	-0.0360986	-0.00351424	-0.0473456	-0.0461032	-0.0683266	0.0346922	0.00247313	-0.0104437
-0.0305998	-0.0190267	-0.0119711	-0.0279386	-0.00988593	0.000369526	-0.0675356	-0.0601957	0.00555559	-0.0208076	0.0515877	-0.0831842	-0.0481477	-0.142129	0.0530305	-0.019071	-0.00392002
-0.027689	-0.0198878	-0.0249059	-0.0215608	-0.0113058	-0.0212105	-0.0677811	-0.0475996	0.000252036	-0.0372298	0.000147343	-0.0586593	-0.0394907	-0.0924492	0.071759	0.0039445	0.00657734
0.0201565	-0.050577	-0.0211547	-0.0220037	-0.00289824	-0.0268836	-0.0112523	-0.0647768	-0.00062753	-0.0285528	-0.0546181	-0.0835082	-0.0560188	-0.110592	0.0195518	-0.015319	0.0083121
0.0190543	-0.0246238	-0.0196335	-0.0127262	-0.0790449	-0.0617703	-0.0551219	-0.013824	0.027185	-0.0454458	-0.0251275	-0.0597953	-0.0543243	-0.0853617	0.0552044	-0.0128686	-0.0118387
0.0795606	-0.0386883	-0.0190802	-0.0242677	-0.0195857	-0.014425	-0.0683621	-0.0299742	0.00318337	-0.0448247	-0.0324507	-0.0649957	-0.0633803	-0.0379049	0.0474122	0.0366484	0.0126112
-0.0751105	-0.0320636	-0.00902053	-0.0498839	-0.0243718	-0.00971134	-0.0356297	-0.0400468	0.00634033	-0.0451483	-0.00274234	-0.0933829	-0.0679053	-0.0616333	0.0608586	-0.054661	-0.0167777
0.00387829	-0.0194573	-0.03019	-0.0111952	-0.054253	-0.0307491	-0.0578141	-0.0076583	0.0157016	-0.0600045	-0.0473939	-0.0680628	-0.0192603	-0.0592932	0.0878643	-0.0745753	0.008856
-0.0463128	-0.0344546	-0.0359145	0.000119145	-0.0187242	-0.0212105	-0.0861604	-0.00832887	-2.26241e-05	-0.08529	-0.00980821	-0.0697963	-0.0440525	-0.121646	0.0343739	0.0004585	-0.00102194
-0.0307129	-0.0585421	-0.0403297	-0.00751665	-0.0386663	-0.0383271	-0.0413824	-0.0278283	0.0164161	-0.0852018	-0.0258598	-0.0712058	-0.00143062	-0.0507127	0.0807035	0.0149344	0.00652223
-0.0157064	-0.0218253	-0.0463815	-0.0391766	0.00661012	0.00664052	-0.0554246	-0.0660261	0.0133507	-0.0738275	0.00028589	-0.031955	-0.0675124	-0.0816628	0.0760734	-0.0148833	-0.00358021
0.00938913	-0.0209642	-0.071281	-0.00209333	-0.0449839	-0.0187911	-0.0627649	-0.0242567	0.0227071	-0.068008	-0.015449	-0.0876903	0.00604756	-0.111632	0.0670723	-0.0222854	-0.00310366
0.0186304	-0.0155364	-0.0418862	-0.020383	0.0394427	-0.0403294	-0.0668237	-0.0226014	0.00688638	-0.0712676	-0.0174283	-0.0436852	-0.0151283	-0.0408909	0.0517087	-0.00775283	0.0178023
-0.0347259	-0.0406515	-0.0663124	0.00660003	0.00802999	-0.0150229	-0.0616602	-0.0220226	0.0179611	-0.0867417	0.000998414	-0.080563	0.0099033	-0.0938835	0.07546	-0.0453009	-0.0302068
0.01945	-0.0400057	-0.0651515	-0.0228111	-0.00320136	-0.0246449	-0.0475443	-0.0324306	0.0184646	-0.0924729	-0.0127969	-0.0730865	-0.0200462	-0.0994109	0.108305	-0.0541687	0.00446807
0.0201565	-0.0518199	-0.0906137	-0.0191861	-0.0033928	-0.000979224	-0.0881161	0.0150352	0.00834469	-0.0787382	-0.00717583	-0.0576916	0.0173815	-0.0501256	0.107671	-0.0431787	0.000291374
-0.00344125	-0.0196725	-0.0846891	-0.0258139	-0.0100136	-0.0446537	-0.0817742	-0.0110747	0.0222215	-0.0958535	-0.0216242	-0.0715297	0.0331667	-0.117612	0.0624396	-0.142648	-0.0117907
-0.0214999	-0.0380195	-0.0743681	-0.0192452	-0.00240368	-0.0291778	-0.0779773	0.00777541	0.00572234	-0.0733306	0.0426415	-0.0364822	0.0267875	-0.0308761	0.08394	-0.037463	0.00546811
-0.0365063	-0.0225199	-0.0883955	-0.0438974	-0.0390332	-0.0723796	-0.0791065	-0.0314918	0.0180036	-0.0968114	0.0545169	-0.0851406	0.0159264	-0.0636463	0.0755139	-0.0263656	-0.0118867
-0.038852	-0.023691	-0.0589443	-0.00955922	0.00207929	0.000452954	-0.0879606	-0.0184474	0.0103425	-0.114564	-0.0151719	-0.113873	0.0508368	-0.113519	0.0747901	-0.0412773	0.0195299
-0.00728471	-0.0525862	-0.0708642	-0.0388005	-0.00947114	-0.0322647	-0.0706452	-0.0269566	0.0131872	-0.0958044	0.00992477	-0.082591	-0.0284269	-0.0851017	0.0761093	0.00693815	-0.00371593
-0.016526	-0.0329735	-0.088306	-0.0407094	-0.0164588	-0.0531216	-0.085964	-0.0358928	0.00333705	-0.110075	-0.00610704	-0.100014	0.0240738	-0.0625476	0.0616594	-0.0273446	-0.00477005
0.0752932	-0.0398134	-0.0978264	-0.0439718	-0.0389215	-0.0222672	-0.0453758	-0.051196	0.0053594	-0.106744	0.0199397	-0.0523945	0.0204513	-0.069828	0.0603581	-0.0272371	0.0246454
0.0606824	-0.00780959	-0.0959332	-0.0123864	-0.022234	-0.0249369	-0.0783291	-0.0374104	0.0197987	-0.0915902	0.0056892	-0.0650672	0.0206908	-0.0621533	0.0819124	-0.0485096	0.0107132
-0.0431193	-0.0527298	-0.07981	-0.0275167	0.0125608	-0.0160797	-0.0670856	-0.0377916	0.0341742	-0.10862	-0.0283734	-0.0568501	-0.0333878	-0.133481	0.0674445	-0.0457366	0.0108693
-0.00578689	-0.0410563	-0.104632	-0.0313422	-0.04977	-0.0173867	-0.0783046	-0.0291483	0.0224684	-0.121152	0.024868	-0.108652	0.00340748	-0.0355648	0.0874178	-0.0572698	0.0459319
0.00580002	-0.0643774	-0.10969	-0.0354331	-0.0313117	0.0112708	-0.0813242	-0.0366093	0.0164341	-0.109977	-0.0134104	-0.106051	0.0412343	-0.0727552	0.0682068	-0.0119462	0.0338294
-0.0687801	-0.0827244	-0.102986	-0.0355228	-0.029461	-0.0471565	-0.0538208	-0.0748494	0.0136025	-0.132464	-0.0412187	-0.0672719	-0.016387	-0.122753	0.0365709	-0.0533028	0.020884
-0.0344433	-0.0733729	-0.0677653	-0.0381572	-0.0563429	0.0143576	-0.0761524	-0.0548806	0.0146553	-0.106335	0.0244128	-0.092167	0.0507938	-0.0923905	0.0389681	0.0445371	0.0244556
0.034626	-0.0748311	-0.0998657	-0.0709262	-0.0672073	-0.0383271	-0.06085	-0.0395104	0.0205883	-0.0880723	0.0312609	-0.0759349	0.0601262	-0.0363448	0.0355648	-0.0286518	0.0249179
-0.0268694	-0.0608871	-0.0989968	-0.049817	-0.0149911	0.00872622	-0.0653016	-0.0553041	0.0147861	-0.122372	-0.00214857	-0.0991218	0.0605559	-0.123139	0.0210764	-0.0507958	0.030612
-0.0303172	-0.0932727	-0.112946	-0.0326594	-0.0494031	-0.0298592	-0.0582724	-0.0762118	0.0105518	-0.107427	-0.0246723	-0.0754384	0.0620111	-0.0464854	0.114406	0.0205935	0.0374969
0.0530803	-0.0519175	-0.0772857	-0.0452966	-0.00958281	0.00978297	-0.0556047	-0.0465478	0.00283351	-0.0948236	-0.00812586	-0.124072	0.0620111	-0.0891361	0.0855955	-0.0413282	0.0328906
0.0587324	-0.0538779	-0.091087	-0.057911	-0.00884895	-0.0385913	-0.0737875	-0.0534512	0.0156444	-0.11787	-0.00173293	-0.0841267	0.0736213	-0.0401779	0.111818	-0.0195068	0.0252577
-0.044928	-0.0478732	-0.0900863	-0.0525335	-0.0296525	-0.0614783	-0.0427326	-0.0658462	0.00390763	-0.145928	0.00723301	-0.0744497	0.0838193	-0.139722	0.0764635	-0.0174412	0.0332314
0.0439803	-0.0976499	-0.0723406	-0.0635195	-0.0503284	-0.0430825	-0.0419062	-0.0750294	0.029433	-0.122009	-0.0224357	-0.0695733	0.109121	-0.137381	0.0873998	-0.0411131	0.0431155
0.0330999	-0.0786342	-0.0984457	-0.0609825	-0.0251057	-0.0284548	-0.0464396	-0.0444691	0.0227562	-0.128237	0.0131311	-0.0467524	0.104952	-0.111766	0.127703	-0.00982406	0.0308436
0.00483915	-0.0667942	-0.115751	-0.0635271	-0.00345662	-0.0658861	-0.0339849	-0.0454749	0.0221839	-0.137414	-0.0056914	-0.0832852	0.123605	-0.128407	0.122513	-0.0184768	0.0422114
0.00650654	-0.0649285	-0.130264	-0.0578671	-0.0204472	-0.0315555	-0.0455967	-0.0532041	0.0348592	-0.124896	0.0112113	-0.103131	0.0975907	-0.0786685	0.109698	-0.02533	0.05447
0.0568107	-0.0539984	-0.128516	-0.0597684	-0.0250419	-0.0524959	-0.0582724	-0.0695555	0.0394793	-0.122084	0.0077674	-0.0712815	0.0802767	-0.163324	0.11169	0.0385498	0.0477075
0.00995435	-0.0694263	-0.131785	-0.0879807	-0.061129	-0.0383271	-0.0361125	-0.0778	0.0246085	-0.142361	-0.00974883	-0.0449727	0.156827	-0.100057	0.13306	-0.0476437	0.0578855
-0.027152	-0.055026	-0.129204	-0.0790812	-0.00781196	-0.0413027	-0.101594	-0.0761447	0.021942	-0.116787	0.0139426	-0.0506653	0.157373	-0.151489	0.0744744	0.0278881	0.0600621
0.00981305	-0.118508	-0.130702	-0.0686775	-0.0540137	-0.00488643	-0.053387	-0.0847245	0.024821	-0.149383	-0.0436729	-0.061432	0.144467	-0.0979766	0.121492	0.0230439	0.0408236
0.0438672	-0.0536396	-0.152829	-0.0713481	-0.0775772	-0.0500348	-0.0932797	-0.089549	0.0248406	-0.138356	-0.0233066	-0.0347024	0.169653	-0.105525	0.125154	0.0301178	0.0593957
-0.0181934	-0.071602	-0.147277	-0.0942192	0.00568481	-0.0480047	-0.0523642	-0.0317388	0.0305741	-0.124098	-0.0123812	-0.0291571	0.160369	-0.0866702	0.0949687	-0.0726173	0.0332243
0.021513	-0.0737317	-0.150048	-0.100574	-0.0033928	-0.0583359	-0.0730756	-0.0454326	0.039893	-0.158273	-0.0205753	-0.0359857	0.183393	-0.0714552	0.0992087	-0.000135704	0.032809
-0.0510041	-0.0701898	-0.139772	-0.0850219	-0.0426547	-0.0660112	-0.089941	-0.041455	0.0374979	-0.151819	-0.039754	-0.0204183	0.171979	-0.137574	0.130475	-0.00432909	0.0354152
0.0227565	-0.137524	-0.150826	-0.0832313	-0.0564705	-0.0202789	-0.104589	-0.10266	0.0366183	-0.153473	-0.0186356	-0.0426965	0.158202	-0.101097	0.117863	0.000300046	0.0568579
-0.0329172	-0.0909765	-0.144785	-0.0824467	-0.0670159	-0.0321812	-0.0804076	-0.0272707	0.0448172	-0.189051	-0.0101249	-0.0321275	0.166233	-0.0966765	0.11844	-0.0343619	0.0321559
0.0333825	-0.060072	-0.14678	-0.0756241	-0.0300194	0.00367883	-0.0941307	-0.0743377	0.0355049	-0.157053	0.00169115	-0.0291823	0.198307	-0.0897233	0.138899	0.0623293	0.0580345
-0.0190129	-0.0990363	-0.152796	-0.0775636	-0.0348693	-0.0250204	-0.0805631	-0.0625639	0.0301393	-0.172433	-0.02012	-0.0354682	0.0853911	-0.0955107	0.130865	0.0183638	0.0295711
-0.0307129	-0.109252	-0.133508	-0.0585562	-0.032221	-0.0458773	-0.0863813	-0.0553711	0.0426314	-0.158309	0.0428197	0.00286957	0.16277	-0.149929	0.108156	0.0736475	0.0439727
0.0304717	-0.0859305	-0.159107	-0.0739901	-0.00915206	-0.0191665	-0.0726419	-0.0305989	0.0408494	-0.181567	0.00770802	-0.0537325	0.137345	-0.0938835	0.12988	-0.0192351	0.0569732
-0.0270107	-0.0815992	-0.127209	-0.0457338	-0.0261586	0.00846203	-0.0736157	-0.0571358	0.037099	-0.16849	0.00745072	-0.031509	0.132618	-0.152202	0.117437	0.0171132	0.0587692
0.020976	-0.0650491	-0.151986	-0.0455563	-0.073525	-0.0372286	-0.0786483	-0.109472	0.0482537	-0.178285	-0.000941236	-0.0553187	0.135534	-0.119239	0.0916963	-0.0172261	0.0532179
-0.0009543	-0.0608154	-0.125768	-0.0463179	-0.0176873	-0.0322647	-0.0677566	-0.0200109	0.037493	-0.177726	-0.0342914	-0.0870971	0.170168	-0.166838	0.16862	0.0454596	0.0621305
-0.0240999	-0.0820298	-0.123458	-0.0578747	-0.0837672	-0.0840734	-0.111233	-0.0353811	0.040184	-0.175738	-0.023366	-0.0837059	0.165404	-0.196354	0.137243	-0.0562908	0.0524424
-0.0184477	-0.0770326	-0.147738	-0.0366033	-0.0775134	-0.0229903	-0.0799985	-0.0533841	0.0316368	-0.185932	-0.0028413	-0.0956844	0.116722	-0.137054	0.134715	0.0393647	0.0542864
0.00441524	-0.0713149	-0.123006	-0.0599249	0.0847829	-0.0661364	-0.0822734	-0.0736212	0.0325442	-0.193118	-0.0230691	-0.0556384	0.12711	-0.124574	0.122978	0.0022015	0.0600549
0.0165674	-0.076912	-0.157753	-0.0510006	-0.0375017	-0.0480464	-0.111839	-0.0480902	0.0266145	-0.161418	-0.0590318	-0.0990966	0.128289	-0.168457	0.164156	0.00835293	0.0674022
0.0368303	-0.0331888	-0.186475	-0.0427138	0.024526	-0.0551239	-0.099597	-0.045722	0.0240526	-0.168405	-0.0424854	-0.0752659	0.118767	-0.129061	0.0998221	-0.0336545	0.0434216
0.0216543	-0.0944926	-0.127254	-0.0525468	-0.0535829	0.0263573	-0.0919131	-0.0566664	0.032827	-0.1985	-0.0493335	-0.0705368	0.084642	-0.0993438	0.153667	-0.00237104	0.0271904
-0.0329172	-0.0626553	-0.140877	-0.0354407	-0.0351086	-0.0598237	-0.0689922	-0.0638591	0.0323137	-0.1891	-0.0783689	-0.0820692	0.0806267	-0.136476	0.158261	0.0139554	0.0306456
0.0293695	-0.0814327	-0.120089	-0.0656957	-0.0503922	-0.0652465	-0.0873306	-0.0503242	0.0488668	-0.185448	-0.0391999	-0.0630645	0.0734248	-0.127954	0.143326	-0.032732	0.0678716
-0.0680736	-0.0628705	-0.133779	-0.0413299	-0.0448084	-0.0332519	-0.0593771	-0.0923619	0.0400532	-0.194223	-0.0614465	-0.0770961	0.131279	-0.139529	0.150636	-0.0499809	0.034109
0.0271651	-0.0778937	-0.110895	-0.0498399	-0.0350448	-0.0321395	-0.0982714	-0.0408762	0.037251	-0.172145	-0.0841483	-0.0832852	0.1044	-0.0869889	0.152904	-0.00383675	0.055865
-0.0882235	-0.0827244	-0.126849	-0.0531539	-0.0530884	-0.042568	-0.0606127	-0.0502325	0.0238401	-0.184078	-0.0279182	-0.113949	0.0896398	-0.0970708	0.153443	-0.00372922	0.0462115
0.00664784	-0.042612	-0.119898	-0.0508021	-0.0348693	-0.00679136	-0.0942616	-0.0576052	0.0381257	-0.204702	-0.0423864	-0.0928612	0.0494983	-0.123139	0.189301	-0.072074	0.0503546
-0.0229977	-0.0602643	-0.109803	-0.061307	0.00893935	-0.0200564	-0.0938688	-0.0456338	0.042924	-0.195305	-0.0188335	-0.106077	0.0702014	-0.059419	0.164564	0.00971111	0.0431094
0.037226	-0.0784419	-0.114941	-0.0539022	-0.0308809	-0.0226427	-0.0969293	-0.0897255	0.0315649	-0.182215	-0.0183783	-0.0815012	0.0710242	-0.140242	0.15227	-0.0544969	0.0369796
0.00594132	-0.0994209	-0.123244	-0.049943	-0.0465314	-0.0666509	-0.0513495	-0.0634145	0.0500734	-0.206134	-0.023742	-0.0856834	0.0953865	-0.142196	0.157311	-0.0213573	0.0530547
0.047852	-0.0743517	-0.0963829	-0.0658427	-0.0257279	-0.0432911	-0.046636	-0.0198097	0.0412957	-0.18827	-0.0338757	-0.127757	0.109084	-0.147656	0.188519	-0.0981907	0.0636949
0.0781758	-0.0446441	-0.116067	-0.0478795	-0.0289824	-0.0722405	-0.0941962	-0.0346188	0.041845	-0.196348	-0.041476	-0.10922	0.0810994	-0.0978508	0.15891	0.0278881	0.0634428
-0.0301759	-0.0967888	-0.152201	-0.05248	-0.0202079	-0.066484	-0.112363	-0.0835845	0.0450526	-0.197542	-0.0562411	-0.120012	0.0831071	-0.152336	0.168992	0.00552338	0.0403266
-0.0285085	-0.114392	-0.111279	-0.0723465	-0.0163312	-0.0620345	-0.0939752	-0.0534265	0.0487507	-0.196038	-0.0276411	-0.119023	0.0822844	-0.117293	0.182456	-0.0247301	0.0410818
0.0160021	-0.0923628	-0.100914	-0.0444166	0.0375442	-0.0635084	-0.0738366	-0.0547006	0.0402445	-0.190231	-0.0273838	-0.152063	0.0382811	-0.139982	0.174887	-0.00133543	0.042143
-0.033765	-0.120492	-0.119818	-0.0481887	-0.0233348	-0.0352403	-0.109515	-0.0772388	0.0319998	-0.200252	-0.039952	-0.0861799	0.0848815	-0.0819228	0.205445	-0.0349617	0.0495719
0.0834323	-0.0451723	-0.11609	-0.038497	-0.0330825	-0.0367698	-0.0862749	-0.0734871	0.0285109	-0.206765	-0.0429604	-0.103603	0.0500509	-0.0626734	0.208253	-0.0267447	0.0306936
-0.0376085	-0.0888008	-0.112697	-0.0467093	-0.047377	-0.0791511	-0.105522	-0.0404951	0.0171502	-0.194312	-0.0332226	-0.12323	0.0962952	-0.119306	0.170573	0.00138659	0.0677226
-0.0323803	-0.0774143	-0.107582	-0.0479902	-0.0264618	-0.0510916	-0.0645897	-0.0943277	0.0263349	-0.196064	-0.00527576	-0.143897	0.0507201	-0.103571	0.173399	-0.0540611	0.0499188
-0.0198325	-0.114536	-0.119752	-0.0357595	-0.0263979	-0.0883143	-0.0841473	-0.0897043	0.0345747	-0.211852	-0.0243358	-0.10927	0.0681139	-0.150776	0.196834	-0.0127611	0.0351764
-0.0505802	-0.0380424	-0.0987165	-0.0413089	-0.0224095	-0.0441809	-0.0962092	-0.0834504	0.0366379	-0.200079	-0.0225545	-0.101251	0.0388705	-0.0909562	0.15718	-0.0457932	0.0556813
-0.0240999	-0.071866	-0.105656	-0.0433362	0.0303651	-0.0670263	-0.112641	-0.0500983	0.048257	-0.197143	-0.0351226	-0.120554	0.0746834	-0.103504	0.204886	-0.0781688	0.0142644
-0.0545649	-0.0466304	-0.128945	-0.0587108	-0.0114813	-0.0361302	-0.109605	-0.105117	0.0363992	-0.21655	-0.0319757	-0.0817242	0.101176	-0.119893	0.160119	-0.0273446	0.0372041
-0.029215	-0.0778678	-0.13681	-0.0357137	0.00820548	-0.0799993	-0.0596799	-0.102103	0.0505099	-0.211103	-0.0183783	-0.0717738	0.0389503	-0.152924	0.20736	-0.0667431	0.0510342
0.0434433	-0.0418226	-0.115492	-0.034471	0.00956154	-0.0920824	-0.0711198	-0.0641486	0.0305365	-0.216586	-0.0270276	-0.142062	0.0457592	-0.141156	0.17751	-0.0278369	0.0379051
0.0274478	-0.0602643	-0.10267	-0.0384378	-0.0238294	-0.0020916	-0.0568812	-0.0764341	0.0444396	-0.17805	-0.0293433	-0.0748956	0.0200952	-0.123466	0.210578	-0.0213063	0.0639061
-0.00977165	-0.0239321	-0.103019	-0.0161737	-0.015725	-0.0242139	-0.0584442	-0.10152	0.0362227	-0.218266	-0.0267307	-0.109569	0.0355673	-0.101558	0.19051	-0.0604276	0.0384419
-0.0508628	-0.0587086	-0.0931498	-0.0566473	-0.0175596	-0.0604216	-0.107584	-0.09779	0.0432804	-0.208206	-0.0473741	-0.0647474	-0.0533419	-0.175872	0.198043	-0.0264222	0.029714
-0.0146042	-0.0548825	-0.0911789	-0.0459323	-0.0179266	-0.0629244	-0.0755305	-0.089549	0.0470979	-0.194285	-0.0334601	-0.0767511	0.0433586	-0.141609	0.207565	-0.0265297	0.0278567
-0.0547062	-0.0641162	-0.0976333	-0.0509261	-0.0270201	-0.0586001	-0.0905711	-0.111685	0.0448107	-0.237271	-0.0247514	-0.0952384	0.00250494	-0.104804	0.188203	-0.0484586	0.0306864
0.0423412	-0.0343828	-0.119243	-0.0457338	-0.0132043	-0.0599488	-0.125906	-0.139718	0.0388238	-0.212983	-0.0478689	-0.0793723	-0.0466496	-0.180552	0.24878	-0.0488944	0.0193666
-0.0183064	-0.0562229	-0.101533	-0.0202722	-0.0292855	-0.0671236	-0.08972	-0.116241	0.0411796	-0.198078	-0.0562411	-0.106918	0.0336394	-0.0965507	0.219264	-0.0305533	0.0186115
0.030076	-0.0475144	-0.0927448	0.00454409	0.00973703	0.0136346	-0.0967738	-0.0866232	0.0363191	-0.222167	-0.0547962	-0.0780133	0.00892094	-0.0836087	0.19302	-0.0771898	0.0316865
0.00650654	-0.0692828	-0.110601	-0.0261404	-0.0346141	-0.0523708	-0.0786728	-0.0647979	0.0263153	-0.234362	-0.0316194	-0.104124	0.00274439	-0.114886	0.212085	-0.0623347	0.0273394
0.00345438	-0.0659331	-0.0988955	-0.0447564	-0.0410593	-0.0434996	-0.0979031	-0.11423	0.0488308	-0.213107	-0.0513722	-0.130231	-0.0285866	-0.117939	0.253577	-0.0603201	0.0242372
0.0147587	-0.0572734	-0.0671012	-0.0368457	-0.00345662	-0.045196	-0.105072	-0.0801646	0.0367099	-0.230572	-0.0417729	-0.106375	-0.0343702	-0.144142	0.25168	-0.0473155	0.0288976
0.037226	-0.0495495	-0.120788	-0.0164849	0.0348321	-0.0829332	-0.119957	-0.0625639	0.044518	-0.22116	-0.0496106	-0.120853	0.0245465	-0.109359	0.224844	-0.0576547	0.0162165
0.0126956	-0.0873886	-0.11548	-0.0263618	-0.0483661	-0.0795405	-0.0780673	-0.0828257	0.0593578	-0.233456	-0.0181606	-0.11771	0.0177376	-0.15617	0.224081	-0.0241359	0.0147205
-0.0163847	-0.0611024	-0.0873594	-0.0346638	-0.0326039	-0.0955586	-0.0586651	-0.0792293	0.0322842	-0.205137	-0.0613079	-0.121968	-0.0056793	-0.123206	0.220565	-0.0606992	0.0566405
0.0529672	-0.0945414	-0.106264	-0.0381114	-0.0306895	-0.054818	-0.0894582	-0.0626309	0.0448875	-0.222304	-0.00966967	-0.0991218	-0.0304776	-0.0949906	0.235926	-0.0393136	0.0173329
-0.0355455	-0.0621788	-0.105206	-0.0666062	-0.028424	-0.102594	-0.0604409	-0.0691743	0.0428521	-0.213578	-0.023841	-0.088902	0.00872447	-0.107144	0.2384	-0.0528671	0.0115296
0.00924783	-0.0307949	-0.0797982	-0.075166	0.00962536	-0.0760643	-0.0781082	-0.0589675	0.0518783	-0.191663	-0.0332028	-0.099593	-0.0220539	-0.149023	0.217998	-0.076805	0.0313191
-0.0201151	-0.0311308	-0.0843618	-0.063802	-0.0221064	-0.094627	-0.0627812	-0.0647097	0.0385426	-0.220875	-0.037755	-0.0773443	-0.0146126	-0.129908	0.184651	-0.00840929	0.0340539
-0.0232803	-0.0163717	-0.0820753	-0.0743375	-0.0306256	-0.088064	-0.0704488	-0.07648	0.0377169	-0.198287	-0.0365279	-0.109691	-0.0373664	-0.0847159	0.20256	2.84098e-05	-0.00122603
-0.00301733	-0.0389294	-0.0538273	-0.0588578	-0.0765881	-0.0807641	-0.0951945	-0.092676	0.0412041	-0.240642	-0.028987	-0.117786	-0.0306311	-0.139856	0.219913	-0.0523747	0.0469932
-0.0187303	-0.036392	-0.0661664	-0.0645923	-0.0430216	-0.0843237	-0.0850556	-0.0346858	0.0213616	-0.228022	-0.0200211	-0.0988988	-0.00151043	-0.1273	0.248649	-0.0846428	0.0304691
0.0145043	-0.0820298	-0.0758775	-0.07416	-0.0438831	-0.0661364	-0.0712098	-0.0288801	0.0278537	-0.195515	-0.0427031	-0.121396	-0.0381093	-0.0529857	0.231761	-0.0457366	0.0322988
-0.0118347	-0.0504565	-0.0886993	-0.0453329	-0.00805126	-0.0913594	-0.0900228	-0.0270907	0.0349801	-0.223102	-0.0259588	-0.0975398	-0.00674147	-0.138036	0.251829	-0.0320247	0.0267679
0.0297934	-0.0640674	-0.0899497	-0.0670052	-0.0279933	-0.0556245	-0.0827562	-0.0481572	0.0426772	-0.217992	-0.00852171	-0.106821	-0.0658178	-0.0973979	0.239907	-0.0541687	0.0285302
-0.0372128	-0.0811457	-0.0900509	-0.00331505	-0.0693451	-0.0645373	-0.057945	-0.0427291	0.0385393	-0.221572	-0.0516295	-0.0842487	-0.0635338	-0.139269	0.238549	-0.0670148	0.0176114
0.0638476	-0.0204159	-0.0804528	-0.0230402	-0.0113058	-0.0683472	-0.0523887	-0.0331894	0.0390935	-0.221683	-0.0419312	-0.119317	-0.0302382	-0.124314	0.236765	-0.0670657	0.018088
-0.00852818	0.00204415	-0.100574	-0.0117202	-0.0915047	-0.065761	-0.0932797	-0.0540759	0.0298319	-0.232462	0.0077674	-0.104074	-0.0766053	-0.155071	0.282014	-0.0310456	0.00926418
-0.031702	-0.0153212	-0.0823908	-0.0373268	-0.0605706	-0.104291	-0.107805	-0.0417903	0.0553475	-0.244866	-0.0182793	-0.090808	-0.060507	-0.145123	0.266076	-0.0648926	0.0451911
0.00387829	-0.0323277	-0.0541429	-0.0355515	-0.0653567	-0.0951415	-0.0666519	-0.0271825	0.0458668	-0.224331	-0.0271859	-0.126819	-0.0179587	-0.146482	0.24504	-0.0388269	0.0267955
0.0071848	-0.0350286	-0.0716177	-0.0387852	-0.0478715	-0.0930558	-0.0632395	-0.0358717	0.0449169	-0.245389	-0.0328465	-0.125208	-0.0764825	-0.116899	0.247068	-0.103091	0.0253332
0.00291742	-0.00893475	-0.0863327	-0.0318748	-0.0737643	-0.0760226	-0.0567258	-0.0276519	0.0399126	-0.234934	-0.024415	-0.133774	-0.0948648	-0.118333	0.28975	-0.0551477	0.0194554
-0.016526	-0.0600261	-0.0528595	-0.0461843	-0.0027068	-0.0656358	-0.0730265	-0.0270484	0.0311088	-0.264783	-0.0352216	-0.105584	-0.0362981	-0.124766	0.268363	-0.0435579	0.0315304
0.000854388	-0.0326606	-0.0666844	-0.0327472	-0.0364009	-0.0979363	-0.0885089	-0.0166616	0.0544745	-0.296222	-0.0302933	-0.13929	-0.0791594	-0.104938	0.240223	-0.0482945	0.0329723
-0.00564558	-0.0306514	-0.0947158	-0.05072	-0.0586083	-0.127317	-0.0797366	-0.0671661	0.0319474	-0.26737	-0.0154886	-0.145479	-0.092544	-0.132181	0.226052	-0.0384477	0.0333396
-0.0398128	-0.0735165	-0.0776813	-0.0364468	-0.088984	-0.111243	-0.0834927	-0.0104747	0.0320831	-0.249777	-0.0523222	-0.0983813	-0.103092	-0.106498	0.27664	-0.0882873	0.019537
-0.0263042	-0.0414868	-0.0816915	-0.0571569	-0.0426547	-0.109547	-0.0748759	-0.0185815	0.0332308	-0.266137	-0.056914	-0.138204	-0.0692438	-0.117486	0.239424	-0.0445369	0.0290129
0.0468911	-0.0622505	-0.0779615	-0.0236988	-0.0416177	-0.0626185	-0.0839018	0.00111911	0.0274777	-0.281676	-0.0246129	-0.130778	-0.0817995	-0.122166	0.255271	-0.0500375	0.0364081
-0.0483758	-0.0815992	-0.07154	-0.0355515	-0.087947	-0.129695	-0.0953664	-0.0145369	0.044608	-0.242208	-0.0304318	-0.133526	-0.123832	-0.107866	0.227464	-0.0734322	0.000134225
-0.0387107	-0.0475632	-0.0728139	-0.051201	-0.100215	-0.0971715	-0.0839018	0.00773306	0.038657	-0.263302	-0.0472949	-0.12875	-0.0954542	-0.0845817	0.273365	-0.0359973	0.0185166
0.0115935	-0.0950179	-0.0957754	-0.0391918	-0.113409	-0.0947938	-0.0954073	-0.0270484	0.0472875	-0.279613	-0.0531733	-0.144536	-0.081996	-0.169824	0.269908	-0.0799062	0.00311393
0.012413	-0.0812892	-0.0749309	-0.0204803	-0.00811508	-0.127067	-0.0702115	0.00415786	0.0369028	-0.238069	-0.00939257	-0.133526	-0.0773482	-0.108251	0.265704	0.00443118	0.00689674
-0.0126542	-0.0187167	-0.0728916	-0.0249263	-0.0704619	-0.0552908	-0.0870932	-0.0505466	0.0231453	-0.257758	0.0136853	-0.0937784	-0.0866007	-0.106104	0.276658	-0.0333319	0.0152511
-0.0213586	-0.0590444	-0.0731507	-0.0508975	-0.0475046	-0.0562641	-0.0857921	-0.0439573	0.0427638	-0.249829	0.0207908	-0.133774	-0.0847097	-0.120673	0.229456	-0.0920449	0.013945
0.00540437	-0.0436654	-0.0653775	-0.0300537	-0.0481746	-0.135034	-0.0981404	0.012847	0.0381861	-0.274206	-0.0448605	-0.148449	-0.0617226	-0.120799	0.273311	-0.0591204	-0.00293324
0.0354455	-0.0521327	-0.0813312	-0.0264801	-0.0951262	-0.102733	-0.10661	-0.0173322	0.0298662	-0.301989	0.0190095	-0.0801423	-0.0975786	-0.137314	0.279189	-0.0285952	0.0164757
-0.0339063	-0.0596902	-0.0769018	-0.0374528	-0.0887447	-0.0856446	-0.098255	-0.0355576	0.0233022	-0.249989	-0.0205357	-0.11843	-0.0772315	-0.128214	0.253541	-0.0225004	-0.00419248
0.0164261	-0.0361538	-0.0760588	-0.0392663	-0.080401	-0.075383	-0.0595489	-0.0391116	0.053966	-0.270786	-0.0361518	-0.121126	-0.0318959	-0.0987567	0.245189	-0.108801	-0.0193563
0.0806627	-0.0821991	-0.0887323	-0.0466654	-0.0833364	-0.0869516	-0.074614	-0.0125499	0.0418401	-0.272463	-0.00974883	-0.101402	-0.0839238	-0.106364	0.271766	-0.0509034	0.00582833
0.0137978	-0.0466533	-0.0558901	-0.0235136	-0.12188	-0.115998	-0.127248	-0.0473066	0.0431971	-0.294218	-0.0452761	-0.135554	-0.0674326	-0.128407	0.269926	-0.0495452	0.00212104
-0.0151412	-0.0757151	-0.0499749	-0.00869256	-0.0403893	-0.133671	-0.0606127	-0.0234061	0.0333485	-0.274566	-0.0209513	-0.10484	-0.0858885	-0.124314	0.266132	-0.0171696	0.00747533
0.0299347	-0.0655514	-0.0767441	-0.0170919	-0.0749927	-0.0871741	-0.117984	-0.0368775	0.0385851	-0.26651	-0.0195658	-0.146665	-0.0983276	-0.152664	0.252963	-0.0731096	0.0200126
-0.0350085	-0.103726	-0.0703343	-0.0446304	-0.0486054	-0.0903861	-0.104916	-0.0155887	0.0440554	-0.258529	-0.0706301	-0.133896	-0.15205	-0.099738	0.269366	-0.0259864	0.0212371
-0.0460302	-0.0616047	-0.0747284	-0.0426699	-0.0641283	-0.0899272	-0.0878788	-0.0549476	0.03233	-0.228696	-0.042901	-0.180152	-0.102699	-0.117486	0.211972	-0.0669016	0.00314149
0.0164261	-0.0831549	-0.0630439	-0.0414406	-0.0143689	-0.0980614	-0.115251	-0.0418115	0.0474118	-0.253494	-0.0456918	-0.128203	-0.110803	-0.145056	0.212827	-0.0418715	0.0223259
-0.0374672	-0.0823168	-0.124021	-0.0322891	-0.062852	-0.0872575	-0.0963401	-0.0555053	0.0489747	-0.261151	-0.0219805	-0.117142	-0.0210716	-0.104804	0.288115	-0.106951	0.0189044
-0.0155651	-0.0535421	-0.0676758	-0.0318596	-0.032907	-0.0732277	-0.0967084	-0.0304189	0.0391507	-0.232599	-0.0239993	-0.114445	-0.0270885	-0.161311	0.258189	-0.0975908	0.0139511
-0.0602171	-0.00374238	-0.0777142	-0.0447259	-0.0500253	-0.0574043	-0.0883371	-0.0737765	0.0389088	-0.234538	0.0132301	-0.126916	-0.086128	-0.108444	0.222554	-0.0593411	0.0201901
-0.0151412	-0.0450029	-0.0760235	-0.0364258	-0.0826026	-0.108448	-0.107502	-0.0518418	0.0447731	-0.215108	-0.058537	-0.129318	-0.0492099	-0.170286	0.266725	-0.0715817	0.00965195
-0.0286498	-0.0344546	-0.0874254	-0.0395908	-0.13844	-0.0669428	-0.115701	-0.0335705	0.0519829	-0.250163	-0.0177647	-0.126621	-0.0570442	-0.137776	0.290792	-0.0227211	0.024374
0.0315738	-0.0426349	-0.0927895	-0.0487079	-0.0840703	-0.0390918	-0.0897037	-0.0316259	0.0298417	-0.263489	-0.0721343	-0.134859	-0.0154046	-0.142129	0.224192	-0.0354541	0.0119041
-0.00522167	-0.0226634	-0.0901404	-0.0252737	-0.0235741	-0.120156	-0.12931	-0.0481325	0.0509268	-0.259722	-0.0632674	-0.111323	-0.0649521	-0.0552588	0.266094	-0.0419281	0.0268026
-0.0232803	-0.0867916	-0.0852189	-0.0324513	-0.0648143	-0.0747851	-0.145832	-0.0527806	0.0437742	-0.232662	-0.0360133	-0.116301	-0.0662537	-0.135301	0.238364	-0.0574905	0.0175635
-0.0126542	-0.0744952	-0.0887888	-0.0574242	-0.00143051	-0.0883143	-0.113598	-0.0393763	0.0364613	-0.233842	-0.0777356	-0.117588	-0.0498423	-0.147463	0.269387	-0.0659226	0.0290884
-0.0351498	-0.0746158	-0.0806883	-0.0430689	-0.0469622	-0.13363	-0.118394	-0.0362069	0.0303011	-0.267193	-0.0141427	-0.132659	-0.0929369	-0.126519	0.241601	0.0361051	0.0273261
0.0176695	-0.0317048	-0.0863327	-0.0346714	-0.0781834	-0.0705442	-0.0941962	-0.0576934	0.0382188	-0.259922	-0.043574	-0.12793	-0.0820758	-0.105265	0.239999	-0.00987499	0.0342447
-0.0221781	-0.0452182	-0.0973979	-0.0434545	-0.0387301	-0.0861869	-0.128835	-0.0479102	0.0386897	-0.231082	-0.0726489	-0.108281	-0.112695	-0.101231	0.274723	0.00595913	0.0141899
-0.0469911	-0.102722	-0.111887	-0.0256517	-0.0944402	-0.0924301	-0.11557	-0.0456761	0.0561878	-0.252661	-0.0330246	-0.0959074	-0.0768754	-0.157411	0.304816	0.0155909	0.0288843
0.000289173	-0.0413921	-0.0894999	0.00915229	-0.0121673	-0.100147	-0.125497	-0.0728377	0.0362488	-0.264385	-0.0446428	-0.0844464	-0.0545637	-0.158904	0.268104	-0.0681579	0.0333396
-0.040378	-0.101645	-0.124191	-0.0344863	-0.0834641	-0.113871	-0.125709	-0.0523995	0.0280401	-0.241463	-0.0203971	-0.106649	-0.0410256	-0.124054	0.286683	-0.0633137	0.00961113
-0.00550428	-0.0725578	-0.104698	-0.0405453	-0.0475046	-0.120017	-0.126577	-0.0574252	0.0361998	-0.229069	-0.0528566	-0.129318	-0.0300048	-0.156564	0.312647	-0.0202141	0.0196727
-0.0387107	-0.0668889	-0.129811	-0.0299353	-0.0782472	-0.0938622	-0.104875	-0.0886773	0.0329954	-0.270786	-0.0239993	-0.101352	-0.0833344	-0.0760012	0.356502	-0.0833356	0.00844067
0.00704349	-0.0891338	-0.107785	-0.0475378	-0.0589752	-0.120059	-0.111143	-0.00683244	0.0362488	-0.242555	-0.0539452	-0.113822	-0.084986	-0.125807	0.321666	-0.0193483	0.0130735
0.0437259	-0.0703333	-0.0773092	-0.0230918	-0.104762	-0.0945853	-0.131004	-0.0775529	0.0348019	-0.254936	-0.0750636	-0.116768	-0.127258	-0.144142	0.31739	-0.0330037	0.042191
0.0654867	-0.0639239	-0.0766334	-0.036735	-0.0528491	-0.0967127	-0.0984023	-0.0408304	0.0392406	-0.268772	-0.056914	-0.0968961	-0.10852	-0.137054	0.315195	-0.0540611	0.0105499
-0.0391346	-0.0531115	-0.0825698	-0.0248232	-0.0284879	-0.126038	-0.107068	-0.05229	0.0370139	-0.265405	-0.0541035	-0.104074	-0.106119	-0.133741	0.335466	-0.0542818	0.0253189
-0.0534628	-0.0844466	-0.0859277	-0.0274862	-0.0451115	-0.116124	-0.0625685	-0.0173322	0.0325867	-0.244919	-0.0391999	-0.0977881	-0.129339	-0.213389	0.348951	0.00350875	0.015292
-0.0264455	-0.0872221	-0.10604	-0.0284349	-0.0646228	-0.116805	-0.0821916	-0.0428844	0.0369142	-0.290265	-0.0253254	-0.117264	-0.114782	-0.135947	0.316869	0.0191278	0.034456
0.00967174	-0.0777014	-0.109407	-0.0425592	-0.109788	-0.128374	-0.0921995	-0.0706072	0.0645829	-0.240704	-0.0436729	-0.0786571	-0.0916353	-0.162418	0.300055	-0.0207631	0.00997849
-0.040802	-0.0902101	-0.13202	-0.0289083	-0.113904	-0.045196	-0.113639	-0.0683731	0.0435126	-0.258964	-0.0511149	-0.105361	-0.0895908	-0.126847	0.36874	-0.0388269	0.0146185
-0.031702	-0.0773426	-0.119278	-0.0370252	0.0126885	-0.117431	-0.162697	-0.107954	0.0330543	-0.268524	-0.0493335	-0.102589	-0.0938026	-0.0985637	0.339355	-0.0612425	0.0409522
0.0463259	-0.0843978	-0.0935549	-0.0280264	-0.0234465	-0.103874	-0.108778	-0.0954218	0.0360036	-0.234747	-0.00276213	-0.108134	-0.094785	-0.180619	0.323917	-0.0331678	0.0326396
0.0496324	-0.093178	-0.128549	-0.0120523	-0.0147996	-0.085297	-0.0970193	-0.0582546	0.0210265	-0.26513	-0.0548556	-0.108925	-0.111909	-0.188814	0.328621	0.0175489	0.0357346
-0.00824557	-0.105853	-0.138442	-0.00365485	-0.0443139	-0.0986593	-0.0818233	-0.0657367	0.0415753	-0.244431	-0.0287891	-0.130357	-0.127884	-0.150063	0.304557	-0.0266372	0.023578
0.0464672	-0.0861199	-0.122297	-0.0134134	-0.0190433	-0.106919	-0.122191	-0.0598851	0.047778	-0.259709	-0.0193481	-0.0872443	-0.135755	-0.0532458	0.28021	-0.0141759	0.0342172
-0.00465646	-0.073947	-0.103346	-0.0166777	-0.0263979	-0.0808892	-0.10188	-0.0842551	0.0384183	-0.270377	-0.0616642	-0.134169	-0.0941158	-0.133548	0.361913	-0.0237001	0.0385102
-0.0129369	-0.0756921	-0.0950431	0.00574291	-0.0485575	-0.0764397	-0.134825	-0.0257955	0.0352499	-0.26359	-0.0322923	-0.143102	-0.0863245	-0.137381	0.310581	0.0117257	0.0444156
0.0264869	-0.071579	-0.0951655	-0.0442906	-0.0334016	-0.13762	-0.111798	-0.0286789	0.041384	-0.266399	-0.0652862	-0.148571	-0.0938824	-0.162418	0.341305	-0.0172771	0.0513199
0.00650654	-0.0841366	-0.0947605	0.00607506	-0.0751203	-0.108698	-0.0918067	-0.0664955	0.0453044	-0.257509	-0.0793586	-0.121324	-0.157128	-0.139856	0.329496	-0.0452443	0.0337753
-0.00934774	-0.0480655	-0.0820188	-0.00830123	-0.00971044	-0.129695	-0.13287	-0.0750506	0.0362178	-0.256937	-0.039952	-0.114121	-0.0946683	-0.108964	0.302455	-0.0429637	0.0552384
-0.104191	-0.0584216	-0.0980855	-0.00076088	0.0164376	-0.121755	-0.11931	-0.0855503	0.032948	-0.268053	-0.0353799	-0.111277	-0.12824	-0.154291	0.275914	-0.0310966	0.0316324
-0.0179107	-0.115756	-0.0488375	-0.0176684	-0.0214364	-0.118376	-0.0923468	-0.0720119	0.0359905	-0.261203	-0.0623767	-0.101474	-0.121941	-0.119046	0.26083	-0.0158114	0.0393745
0.0135152	-0.0675606	-0.054887	-0.0112754	-0.0314233	-0.127192	-0.112886	-0.060531	0.0417567	-0.242666	-0.0828024	-0.083159	-0.1256	-0.138816	0.333272	-0.0493301	0.0333876
-0.0294977	-0.0744493	-0.0696138	-0.021116	-0.0443139	-0.130237	-0.129465	-0.0700919	0.0284913	-0.222876	-0.073124	-0.0770709	-0.142091	-0.164297	0.331152	-0.0201066	0.0458575
-0.0574758	-0.0301262	-0.0437441	-0.0112906	-0.0203196	-0.073186	-0.0942371	-0.0838069	0.0429812	-0.250078	-0.0904225	-0.0871938	-0.127135	-0.101424	0.340153	-0.0297384	0.0240678
0.101745	-0.0800206	-0.0580542	-0.00528891	-0.100215	-0.169072	-0.100816	-0.0505924	0.0377905	-0.237582	-0.0444448	-0.129987	-0.133078	-0.137574	0.298903	-0.0555834	0.0127266
0.00195656	-0.0423737	-0.061883	0.0044391	-0.0385546	-0.119169	-0.100031	-0.0493642	0.0341905	-0.271371	-0.0536681	-0.106005	-0.174171	-0.147522	0.375677	-0.00753779	0.016639
-0.0137564	-0.109059	-0.0295589	0.00147259	-0.0221064	-0.0843654	-0.0791474	-0.062878	0.0319883	-0.232338	-0.0660977	-0.106472	-0.112418	-0.144989	0.306379	-0.0605351	0.0224484
-0.0138977	-0.112647	-0.0746601	-0.0197778	-0.0274349	-0.0798325	-0.0975185	-0.0489372	0.0175899	-0.237696	-0.0699176	-0.08034	-0.16689	-0.208969	0.32509	-0.0771332	0.0470687
-0.0741496	-0.0749258	-0.0748532	-0.0114529	-0.0344386	-0.0674573	-0.114728	-0.0551029	0.0248226	-0.254923	-0.0569734	-0.101103	-0.139887	-0.158124	0.357598	0.025981	0.0174145
0.0405607	-0.0495954	-0.0519906	-0.0133771	-0.0614959	-0.114803	-0.0732229	-0.0880738	0.0205965	-0.254975	-0.0754397	-0.140506	-0.176253	-0.133674	0.312906	-0.0274012	0.0443747
-0.027689	-0.0817198	-0.0488493	-0.00804161	-0.0637135	-0.130112	-0.108197	-0.0937489	0.0355017	-0.273807	-0.00992697	-0.114618	-0.159412	-0.128994	0.314916	-0.0579263	0.0281088
0.0217956	-0.0583039	-0.0661311	-0.0350494	-0.0338802	-0.135757	-0.104761	-0.0599522	0.0355916	-0.24656	-0.0588339	-0.129739	-0.104823	-0.150969	0.349547	-0.0187994	0.0679808
-0.0376085	-0.081935	-0.03392	0.000422668	0.0052062	-0.114385	-0.1167	-0.0825328	0.0344128	-0.239645	-0.0688686	-0.15877	-0.0943122	-0.141995	0.365986	-0.0286518	0.0419257
0.0319977	-0.0825321	-0.0627072	-0.0206865	-0.0483023	-0.131335	-0.0866595	-0.0632345	0.0495796	-0.257123	-0.00606746	-0.128527	-0.144965	-0.137448	0.357544	-0.0155907	0.0596468
0.0074674	-0.0865275	-0.050493	-0.0113498	-0.0486692	-0.099591	-0.101225	-0.0550359	0.0414281	-0.246259	-0.0438906	-0.143918	-0.153155	-0.0968778	0.346495	-0.083992	0.0659266
-0.108063	-0.0979599	-0.0145755	0.00437992	-0.0892393	-0.0969213	-0.0806531	-0.133775	0.0514221	-0.216439	-0.0616642	-0.12501	-0.167283	-0.152336	0.318673	-0.040949	0.063103
-0.0370715	-0.0899719	-0.0547739	-0.020864	-0.0739557	-0.123757	-0.0646306	-0.0507266	0.0487998	-0.249381	-0.0914715	-0.131249	-0.14599	-0.159491	0.314859	-0.0216289	0.0482657
0.012413	-0.095879	-0.048701	-0.00315852	-0.0744503	-0.111632	-0.0854484	-0.107665	0.0389186	-0.25455	-0.0721937	-0.153645	-0.132962	-0.132768	0.310414	-0.038012	0.0688655
-0.0135021	-0.116115	-0.0262929	-0.012163	-0.0824749	-0.114552	-0.0894582	-0.0630545	0.0489028	-0.245514	-0.0495117	-0.108875	-0.140047	-0.152462	0.320793	-0.063093	0.052171
-0.0581541	-0.111404	-0.0283651	-0.019207	-0.0756149	-0.102594	-0.0623312	-0.0983265	0.0393714	-0.231118	-0.054341	-0.158644	-0.0658608	-0.163324	0.339504	-0.0555325	0.0709268
-0.0350085	-0.104849	-0.0123102	0.0116988	-0.0424792	-0.135882	-0.0735093	-0.118609	0.0362701	-0.229242	-0.0569734	-0.126743	-0.148821	-0.150709	0.328865	0.0106392	0.0816956
-0.0355455	-0.0735165	-0.0225511	-0.0264878	-0.0724242	-0.123201	-0.123672	-0.0848798	0.0308423	-0.22356	-0.0628517	-0.168695	-0.12517	-0.116639	0.31075	0.00796811	0.0749739
-0.0217542	-0.0747363	-0.0080951	-0.0264801	-0.11636	-0.146644	-0.0781082	-0.057337	0.0318085	-0.236078	-0.0965977	-0.131397	-0.159805	-0.102078	0.283557	-0.0377913	0.0577834
0.0111696	-0.134318	-0.0201398	-0.01923	-0.0379962	-0.187218	-0.0664964	-0.0624298	0.0431545	-0.26631	-0.0901652	-0.13902	-0.137407	-0.144276	0.270688	0.0494888	0.0651368
-0.0374672	-0.104252	0.0316984	-0.0601979	-0.0633944	-0.109769	-0.129989	-0.0810363	0.0366134	-0.218937	-0.130937	-0.144116	-0.114383	-0.131208	0.295759	-0.0231003	0.0524567
-0.0530671	-0.105018	-0.00262023	-0.0760021	-0.012965	-0.0910674	-0.122976	-0.0877844	0.0544548	-0.242754	-0.108711	-0.116423	-0.103288	-0.160011	0.310432	-0.00166366	0.0568507
-0.0649084	-0.102171	0.00616782	-0.0690096	-0.0466431	-0.1321	-0.109932	-0.0910878	0.0316058	-0.229526	-0.123199	-0.146072	-0.139218	-0.136216	0.293695	-0.0354541	0.076076
0.0123	-0.0723913	0.0261434	-0.0748777	-0.0918716	-0.125746	-0.111602	-0.0557064	0.0324608	-0.231939	-0.0997051	-0.145306	-0.10187	-0.104485	0.321704	-0.028052	0.0431971
-0.00564558	-0.0681806	-0.0181006	-0.0877517	-0.0575075	-0.137704	-0.11562	-0.100381	0.0390314	-0.217557	-0.0773397	-0.146295	-0.080854	-0.142255	0.264254	-0.0134119	0.0696206
-0.0234216	-0.0792083	0.0216034	-0.0827808	-0.028424	-0.184465	-0.106201	-0.0781317	0.0292957	-0.241375	-0.103109	-0.176441	-0.140403	-0.126779	0.269777	0.00367286	0.0843212
-0.0356868	-0.104633	0.0169056	-0.101989	-0.0623574	-0.0516895	-0.0906365	-0.103398	0.0292646	-0.224668	-0.119458	-0.171367	-0.0939991	-0.0647535	0.27452	-0.0591769	0.070137
-0.0457476	-0.0811228	-0.00122384	-0.132478	-0.0561515	-0.13121	-0.133221	-0.0673214	0.0362848	-0.250735	-0.102436	-0.18592	-0.132999	-0.107664	0.349303	-0.0257148	0.0417216
0.028126	-0.0907383	0.05705	-0.139013	-0.0394001	-0.117431	-0.126642	-0.098997	0.0395644	-0.238514	-0.0621392	-0.151714	-0.145714	-0.135108	0.301877	-0.0634779	0.065545
-0.0181934	-0.0938697	-0.00529055	-0.120767	-0.0254726	-0.146811	-0.110906	-0.0798752	0.0350276	-0.223932	-0.0879484	-0.173643	-0.13686	-0.128541	0.339093	0.0509036	0.0417552
-0.0523606	-0.0817427	0.0164653	-0.11097	-0.0729028	-0.120364	-0.119719	-0.0862633	0.032706	-0.243912	-0.080744	-0.150528	-0.153272	-0.142582	0.337047	-0.0348542	0.0448237
-0.0132195	-0.121281	0.0466277	-0.11052	-0.0579383	-0.14321	-0.0902028	-0.0546582	0.0307736	-0.249963	-0.049769	-0.176614	-0.134024	-0.142129	0.3467	0.012054	0.0376735
0.0150413	-0.123531	0.022696	-0.0833935	-0.0789173	-0.100272	-0.106504	-0.0596593	0.0363534	-0.262668	-0.0702145	-0.164412	-0.153665	-0.115079	0.33329	0.017764	0.0613203
-0.0436846	-0.0609819	0.00291115	-0.0735758	-0.0465314	-0.136939	-0.118009	-0.0858609	0.040439	-0.227911	-0.0922434	-0.182824	-0.149729	-0.143622	0.320457	-0.0140684	0.0675318
0.0273064	-0.0898772	0.0490508	-0.0562979	-0.0826664	-0.127233	-0.115227	-0.0872691	0.0270935	-0.256466	-0.0732229	-0.146396	-0.175547	-0.114886	0.315919	-0.0443218	0.0597631
-0.0438259	-0.0697363	0.014313	-0.0581191	-0.0564067	-0.133115	-0.0887871	-0.111551	0.0216951	-0.26497	-0.0592495	-0.173643	-0.139887	-0.140954	0.3228	-0.0172261	0.0364489
0.0212586	-0.0762174	0.0350115	-0.0302026	-0.0760456	-0.149064	-0.103378	-0.127923	0.0147518	-0.258693	-0.0981019	-0.161219	-0.177358	-0.160137	0.329961	-0.0384477	0.0503607
-0.0259085	-0.0832267	0.00435463	-0.0380006	-0.0894786	-0.142236	-0.0908984	-0.0881867	0.0151327	-0.217096	-0.0936882	-0.159363	-0.140164	-0.100124	0.331113	-0.0384986	0.0435992
-0.0202564	-0.076648	0.0216599	-0.0243498	-0.0992901	-0.127567	-0.0968639	-0.10878	0.0210902	-0.232387	-0.109087	-0.172061	-0.175547	-0.15669	0.362993	-0.0203783	0.0376459
0.0278717	-0.124464	0.0320021	-0.0346714	-0.0509506	-0.147965	-0.101463	-0.0749377	-0.00688258	-0.266163	-0.0704718	-0.157382	-0.148115	-0.181332	0.333626	-0.0537895	0.0115367
-0.00123691	-0.0591879	0.00390252	0.0073407	-0.0533436	-0.148716	-0.113705	-0.104069	-0.00471963	-0.246609	-0.0887203	-0.149585	-0.127454	-0.141869	0.387301	0.0239154	0.0432318
0.00622393	-0.0609819	0.024229	-0.0331996	-0.0713074	-0.143544	-0.10359	-0.104312	-0.0011278	-0.253171	-0.0921246	-0.143968	-0.182	-0.146029	0.3544	-0.0327886	0.040347
-0.0309955	-0.0681576	0.00302418	-0.0267398	-0.0465314	-0.141347	-0.0778463	-0.112892	-0.000138701	-0.258268	-0.0640789	-0.164336	-0.257604	-0.123659	0.390166	0.0203785	0.0213187
0.00704349	-0.0927216	0.0339072	-0.0452814	-0.0770826	-0.119044	-0.103893	-0.130962	-0.00731419	-0.235941	-0.0838316	-0.151024	-0.115095	-0.142976	0.400691	0.027939	0.0170196
0.0342021	-0.0723425	-0.00179841	-0.0343164	-0.0728549	-0.152999	-0.112444	-0.120106	0.00805041	-0.2682	-0.0809815	-0.180451	-0.153548	-0.175545	0.388787	-0.0451933	0.0296456
-0.0234216	-0.0936803	0.0197549	-0.0211007	-0.081438	-0.17234	-0.117747	-0.114431	0.0123796	-0.235048	-0.0697988	-0.147461	-0.149613	-0.133481	0.382669	-0.021578	0.0357071
0.00580002	-0.0484473	-0.0171539	-0.0461328	-0.0596613	-0.135117	-0.110579	-0.137685	0.00820409	-0.266	-0.0906402	-0.176786	-0.204514	-0.168197	0.383803	-0.00818858	0.0341703
0.0224739	-0.101	0.00696844	-0.0276274	-0.102975	-0.124008	-0.126708	-0.113114	0.00737684	-0.216115	-0.0677998	-0.127707	-0.195304	-0.136148	0.363979	-0.00410838	0.0460136
-0.0330585	-0.0792571	-0.000536248	-0.01294	-0.073525	-0.148466	-0.130685	-0.0942607	0.0213436	-0.224929	-0.0882651	-0.145403	-0.15264	-0.161571	0.382966	-0.0129818	0.0407348
-0.0245238	-0.0776784	0.00490565	-0.0128732	-0.0919993	-0.154778	-0.0636978	-0.0800093	0.0282117	-0.240332	-0.0747667	-0.163794	-0.138076	-0.0763283	0.406736	-0.0377913	0.0354213
0.0371129	-0.111594	-0.00542478	-0.0198294	-0.0705735	-0.136814	-0.125447	-0.0689767	0.0428619	-0.250859	-0.0993884	-0.172158	-0.198571	-0.180619	0.377723	-0.0152115	0.0447554
0.0041609	-0.0544749	-0.0307528	-0.0146561	-0.0886171	-0.15521	-0.107346	-0.123748	0.0199474	-0.248335	-0.0829014	-0.155278	-0.124655	-0.142976	0.374522	-0.0352334	0.00818964
0.0110565	-0.0677988	-0.0528477	0.00358198	-0.0890478	-0.196882	-0.103615	-0.14767	0.0266619	-0.271097	-0.102634	-0.203343	-0.133864	-0.12074	0.403853	-0.0356691	0.0210677
-0.0480932	-0.0693287	-0.0342355	-0.0205605	-0.0915685	-0.125829	-0.11994	-0.0966077	0.0242145	-0.250101	-0.114332	-0.175919	-0.154531	-0.174899	0.379173	-0.0123254	0.0231219
-0.0245238	-0.112911	-0.0325778	-0.0187489	-0.0503922	-0.128624	-0.126969	-0.125777	0.00851308	-0.243451	-0.0816743	-0.177156	-0.135006	-0.128927	0.419122	-0.00993158	0.0115979
-0.061178	-0.0491189	-0.0264389	-0.00639228	-0.0937701	-0.128499	-0.0966675	-0.10668	0.0167905	-0.25046	-0.0761126	-0.145601	-0.129812	-0.147203	0.366822	-0.0596127	0.00488951
-0.0490541	-0.082245	-0.0186539	0.0122753	-0.0752958	-0.130668	-0.100055	-0.121648	0.0194946	-0.238988	-0.0947174	-0.19436	-0.131347	-0.168004	0.420033	-0.0644003	-0.00262711
-0.00881079	-0.052371	-0.036555	-0.00556379	-0.0405169	-0.160215	-0.11553	-0.114812	0.0179251	-0.231007	-0.0481658	-0.161467	-0.186408	-0.179772	0.410362	-0.0653284	-0.00142298
-0.0217542	-0.0575863	-0.0361052	0.00819782	-0.0459092	-0.146046	-0.0977722	-0.0943736	0.0225158	-0.262459	-0.107444	-0.179062	-0.146346	-0.168977	0.418211	0.00105836	-0.00406288
-0.038315	-0.100113	-0.00769008	-0.00199024	-0.0721051	-0.150843	-0.133418	-0.105922	0.0227562	-0.247701	-0.106395	-0.12833	-0.15528	-0.157084	0.401918	-0.0425279	-0.0303292
0.0299347	-0.0928192	-0.0174577	-0.00406145	-0.0699673	-0.166611	-0.110301	-0.13237	0.0296652	-0.226643	-0.0686113	-0.17966	-0.167479	-0.167811	0.412705	-0.027073	-0.00182504
0.0307543	-0.135489	0.00862385	-0.00869256	-0.0929724	-0.138121	-0.124408	-0.136634	0.0320227	-0.233306	-0.0845046	-0.147658	-0.156618	-0.184067	0.430097	-0.0662508	-0.00907022
-0.0272651	-0.114177	-0.0392489	-0.0100174	-0.0953655	-0.179668	-0.0965365	-0.134848	0.0395545	-0.265405	-0.0955289	-0.160726	-0.154764	-0.141089	0.388787	-0.0282161	-0.00487924
0.012413	-0.103893	-0.026201	-0.00969285	-0.020878	-0.182421	-0.0940652	-0.115055	0.0200521	-0.241276	-0.0701353	-0.148597	-0.174368	-0.155909	0.394275	-0.0621706	0.00660387
-0.0432606	-0.0782037	-0.053175	-0.00792325	-0.0619905	-0.150079	-0.132812	-0.117335	0.00527602	-0.261848	-0.0818326	-0.159338	-0.169763	-0.142775	0.440438	-0.0597768	-0.0142602
-0.014039	-0.0780601	-0.0179546	0.00707344	-0.0805765	-0.145031	-0.126127	-0.12828	0.0168003	-0.21977	-0.0802294	-0.139761	-0.163231	-0.164171	0.378187	-0.03997	-0.02388
-0.0533215	-0.127048	-0.01284	0.0226791	-0.0689782	-0.100189	-0.106307	-0.132861	-0.000527802	-0.261612	-0.0826837	-0.130357	-0.161143	-0.144729	0.388436	-0.0915016	-0.0187706
-0.0286498	-0.0767915	-0.0465393	-0.00443942	-0.0672073	-0.154612	-0.0987051	-0.186715	0.000132689	-0.248025	-0.0748261	-0.124366	-0.115212	-0.191674	0.403853	-0.0547176	-0.00394757
-0.00508037	-0.0963353	-0.0352599	-0.0126231	-0.078311	-0.170727	-0.128246	-0.148986	0.000328875	-0.227476	-0.0944403	-0.136719	-0.151461	-0.182766	0.342237	-0.00198622	-0.0189614
0.0158608	-0.118293	-0.0542229	-0.0167292	-0.120891	-0.167293	-0.131683	-0.160714	0.0163425	-0.256927	-0.11449	-0.158597	-0.158503	-0.240372	0.374671	-0.0831715	-0.0299282
0.00953044	-0.0889443	-0.0210864	0.0231888	-0.0792842	-0.166778	-0.121192	-0.108512	0.000927241	-0.244582	-0.0584578	-0.219701	-0.207271	-0.1905	0.391354	-0.0459007	-0.0141316
-0.0125412	-0.126735	-0.0343486	0.0006002	-0.145747	-0.15304	-0.122281	-0.117402	0.00852126	-0.221372	-0.0838316	-0.173147	-0.164839	-0.183152	0.398738	-0.0448142	0.00241391
-0.0144629	-0.102529	-0.0299875	0.00269432	-0.111447	-0.177971	-0.150324	-0.133867	-0.000526167	-0.261053	-0.0837327	-0.139269	-0.210064	-0.210076	0.426265	-0.0889947	-0.00983862
0.0071848	-0.0859305	-0.0450628	-0.00557907	-0.0801457	-0.161022	-0.149719	-0.133666	0.0243747	-0.237546	-0.0784679	-0.162557	-0.144062	-0.195314	0.414584	0.0149344	-0.0271862
-0.0822887	-0.131066	-0.0570722	-0.00341814	-0.121561	-0.181781	-0.145553	-0.116086	0.00550654	-0.26375	-0.116727	-0.154117	-0.126233	-0.181919	0.399967	-0.0532462	-0.0264791
-0.0973235	-0.102673	-0.0428328	0.00433601	-0.0919354	-0.14898	-0.13602	-0.140925	0.00888583	-0.2457	-0.106652	-0.129268	-0.14292	-0.198049	0.423252	-0.0340393	-0.0488942
-0.0554128	-0.109777	-0.0390346	-0.0195411	-0.0910101	-0.131933	-0.139473	-0.152449	0.00432616	-0.243464	-0.127593	-0.186686	-0.173109	-0.234845	0.380605	-0.0587978	-0.0492759
0.0180652	-0.123554	-0.04442	0.00574291	-0.0993539	-0.105737	-0.112755	-0.146442	0.00714305	-0.251307	-0.0895516	-0.138053	-0.152406	-0.198954	0.383246	-0.0656	-0.0302955
-0.00177386	-0.1192	-0.0235542	-0.00636937	-0.0541413	-0.0944601	-0.160463	-0.190713	0.0115115	-0.239174	-0.0780127	-0.166663	-0.16673	-0.159617	0.361728	-0.0327886	-0.0597049
-0.0279716	-0.131712	-0.0185857	-0.00611166	-0.0863517	-0.139275	-0.0968229	-0.138243	0.0052237	-0.223448	-0.0748657	-0.163003	-0.135835	-0.196027	0.344449	-0.0254941	-0.0295812
0.0126956	-0.119728	-0.0318242	-0.0299067	-0.137515	-0.195394	-0.130595	-0.140477	0.0178319	-0.252562	-0.0700759	-0.136471	-0.133078	-0.2459	0.354623	-0.056404	-0.02473
-0.0214999	-0.0965248	-0.0409278	-0.0265546	-0.0693451	-0.179251	-0.11796	-0.174655	-0.00777195	-0.229229	-0.0712635	-0.176117	-0.147758	-0.195188	0.398143	-0.0577056	-0.0654663
-0.0844931	-0.157806	-0.052252	-0.0102846	-0.0393523	-0.148897	-0.145267	-0.144698	0.00397629	-0.247815	-0.0768647	-0.156666	-0.162911	-0.146356	0.42301	-0.0455216	-0.0560925
0.0245652	-0.149005	-0.0141681	-0.0159447	-0.065245	-0.156948	-0.123582	-0.126762	0.00284168	-0.243091	-0.0761918	-0.179113	-0.215768	-0.233998	0.383431	-0.00710204	-0.041847
0.00331307	-0.107601	-0.0632135	-0.00819814	-0.0767795	-0.183311	-0.141683	-0.133037	0.0174314	-0.259288	-0.0908777	-0.176664	-0.129732	-0.194928	0.351685	-0.0336035	-0.0422409
-0.0487715	-0.104229	-0.0215362	-0.00506747	-0.0585445	-0.125662	-0.126192	-0.14863	0.018906	-0.240665	-0.0666717	-0.167458	-0.154647	-0.194987	0.365857	0.0344696	-0.0517107
0.00139134	-0.146158	-0.0543124	-0.0193999	-0.138504	-0.157198	-0.112125	-0.0959795	0.0163327	-0.246472	-0.102239	-0.166663	-0.19916	-0.180099	0.386631	-0.0234285	-0.0422072
-0.014039	-0.138457	-0.0420534	-0.0110978	-0.0506315	-0.173091	-0.134997	-0.147356	0.00657575	-0.254004	-0.110116	-0.144688	-0.192118	-0.202788	0.350699	-0.0359407	-0.0471125
-0.0820061	-0.132668	-0.0477214	-0.0229658	-0.103901	-0.149481	-0.154923	-0.17816	-0.00570874	-0.228967	-0.113718	-0.136395	-0.142134	-0.116899	0.367549	0.00247313	-0.0764198
-0.0256259	-0.124608	-0.00766888	-0.0286124	-0.100949	-0.124258	-0.139751	-0.161162	0.0108591	-0.228706	-0.0971717	-0.158	-0.144412	-0.152856	0.427864	-0.00106379	-0.0693991
-0.0485171	-0.1646	-0.0529608	-0.0246017	-0.118067	-0.112008	-0.125447	-0.146643	0.0087387	-0.241299	-0.110433	-0.156915	-0.158859	-0.168071	0.419569	-0.0068304	-0.0463778
-0.0369302	-0.121258	-0.0244655	0.00213118	-0.00283443	-0.148939	-0.121978	-0.150998	0.0141256	-0.275523	-0.0936288	-0.153523	-0.136897	-0.150256	0.380885	-0.0116746	-0.043643
-0.0278303	-0.135394	-0.0398682	-0.0074422	-0.0677497	-0.135493	-0.14449	-0.127454	0.00197356	-0.244297	-0.137033	-0.200347	-0.166337	-0.232832	0.31073	-0.0273446	-0.0860865
0.0164261	-0.127501	-0.0568815	-0.0201253	-0.0922386	-0.149272	-0.13431	-0.186379	0.0369616	-0.226433	-0.0904423	-0.200697	-0.127725	-0.221257	0.33822	-0.00209375	-0.0621743
0.0296521	-0.151276	-0.0449051	-0.0054378	-0.112053	-0.166736	-0.134482	-0.145616	-0.00298339	-0.246099	-0.0991311	-0.165725	-0.20172	-0.140309	0.337661	0.00361627	-0.0450441
-0.0196912	-0.115948	-0.0358227	-0.0125257	-0.0590391	-0.181489	-0.134392	-0.158928	0.00991908	-0.260693	-0.110987	-0.142386	-0.189674	-0.197327	0.365819	0.0104751	-0.0722217
0.0224739	-0.151589	-0.0505377	-0.0070585	-0.114207	-0.147743	-0.116683	-0.154863	0.0112008	-0.252562	-0.132501	-0.162754	-0.173539	-0.183412	0.385086	0.0104751	-0.0728135
-0.0227433	-0.0845901	-0.0394302	0.00193074	-0.0892871	-0.136647	-0.142378	-0.159553	0.0086684	-0.252065	-0.0904423	-0.163693	-0.188299	-0.137121	0.388564	-0.00933172	-0.0462686
-0.0187303	-0.0687087	-0.0360369	-0.012541	-0.0718658	-0.151775	-0.108197	-0.193329	-0.0102324	-0.247913	-0.078844	-0.176614	-0.157287	-0.201748	0.381257	0.0112334	-0.0607182
-0.00963035	-0.112624	-0.023971	-0.0198656	-0.0678136	-0.138121	-0.171641	-0.179522	0.00903461	-0.256839	-0.0700561	-0.183543	-0.173343	-0.2537	0.413896	0.0785482	-0.0422889
-0.0396998	-0.11327	-0.0319373	-0.0231738	-0.0886171	-0.107558	-0.161502	-0.174722	-0.00321718	-0.241512	-0.0967164	-0.144957	-0.186451	-0.137381	0.424088	0.0571625	-0.0689705
0.00760871	-0.0757409	-0.0243549	-0.0204364	-0.106964	-0.135924	-0.147615	-0.135698	0.00577466	-0.251967	-0.106613	-0.185819	-0.180937	-0.164171	0.397678	-0.0431787	-0.054521
-0.00838688	-0.0886573	-0.0164569	-0.00412063	-0.0908346	-0.18662	-0.114621	-0.185755	-0.00581664	-0.245438	-0.0719364	-0.139117	-0.214276	-0.193561	0.422135	-0.0182052	-0.047337
0.0247065	-0.0946849	-0.0171657	-0.0215302	-0.0835917	-0.124522	-0.105939	-0.150105	0.00313596	-0.223883	-0.103367	-0.125927	-0.194359	-0.201748	0.440214	-0.00873751	-0.0364315
0.0462129	-0.125541	-0.0597331	-0.0363876	-0.160775	-0.148507	-0.114359	-0.131004	-0.00794198	-0.237196	-0.0921444	-0.148525	-0.149846	-0.189074	0.36433	-0.0176562	-0.0469625
0.000147869	-0.0926987	-0.0157246	-0.0240825	-0.09243	-0.134102	-0.117444	-0.118853	0.0106319	-0.245177	-0.0942028	-0.148475	-0.189594	-0.195708	0.395987	-0.0373555	-0.0393704
-0.0245238	-0.103342	-0.0141233	-0.00995056	-0.0771464	-0.157281	-0.161568	-0.165563	0.0124123	-0.235669	-0.0659393	-0.148597	-0.197901	-0.201815	0.43852	0.0192353	-0.0697257
0.00885218	-0.131112	-0.0203541	-0.0120676	-0.130033	-0.178138	-0.126667	-0.120575	0.0133867	-0.225773	-0.0735198	-0.18295	-0.186052	-0.168919	0.418845	0.059828	-0.0637316
-0.0394172	-0.116307	-0.021402	-0.0175577	-0.0938339	-0.150885	-0.14512	-0.182472	0.000459665	-0.227202	-0.0575474	-0.169116	-0.139022	-0.18582	0.364128	-0.00378581	-0.0767117
0.0380738	-0.0929857	0.00472669	-0.0332951	-0.135377	-0.184548	-0.133287	-0.175569	-0.019566	-0.229801	-0.105108	-0.184309	-0.15768	-0.213582	0.373185	0.0170566	-0.0749708
0.00153265	-0.0934162	-0.042369	-0.0461022	-0.079348	-0.172841	-0.148827	-0.189753	0.00899701	-0.205251	-0.086088	-0.174586	-0.143626	-0.243627	0.353135	0.0161851	-0.0875223
-0.00799123	-0.113388	-0.0207026	-0.00804161	-0.0500253	-0.166055	-0.129768	-0.183902	8.69128e-05	-0.241064	-0.110274	-0.147806	-0.178027	-0.195381	0.386054	-0.0348542	-0.0661745
0.00594132	-0.076912	-0.0366916	-0.0245636	-0.101508	-0.194087	-0.147304	-0.212203	0.00203732	-0.238802	-0.10786	-0.142757	-0.165508	-0.155331	0.36768	0.0266318	-0.0567721
-0.0340476	-0.108795	-0.0202199	-0.0503496	-0.0758542	-0.175552	-0.104114	-0.115055	-0.00747931	-0.219136	-0.0729656	-0.192749	-0.157091	-0.219244	0.318727	0.000735796	-0.0600988
0.0158608	-0.125133	-0.0125244	-0.0208793	-0.123045	-0.134603	-0.109196	-0.179924	-0.00908149	-0.246272	-0.121615	-0.159043	-0.18472	-0.163131	0.297191	0.00758895	-0.0706645
-0.00163256	-0.129367	-0.0467748	-0.0360325	-0.0896062	-0.152234	-0.144596	-0.158078	-0.00847822	-0.215942	-0.0999624	-0.136942	-0.144062	-0.22275	0.315586	0.0168925	-0.0854947
-0.0555258	-0.0951384	-0.0189695	-0.0438458	-0.144279	-0.195825	-0.153409	-0.163887	-0.00733381	-0.220702	-0.0812388	-0.182975	-0.189674	-0.106104	0.31912	0.00415954	-0.0755279
-0.0278303	-0.128457	-0.00792791	-0.0255123	-0.0740833	-0.195019	-0.145766	-0.172555	-0.00145478	-0.216462	-0.0966571	-0.197995	-0.169996	-0.178606	0.332248	0.0228232	-0.0772423
-0.109306	-0.0969094	-0.0351139	-0.0555592	-0.0923024	-0.157504	-0.171641	-0.145637	-0.0031714	-0.242581	-0.107543	-0.161269	-0.195857	-0.200649	0.289062	0.00791718	-0.0602008
-0.0259085	-0.120661	-0.0289396	-0.0423359	-0.118865	-0.215152	-0.138557	-0.180305	-0.0065834	-0.216635	-0.0978644	-0.202821	-0.15256	-0.158711	0.344747	-0.0251658	-0.0789026
-0.0259085	-0.109897	-0.0550118	-0.0503134	-0.121019	-0.167585	-0.158294	-0.162994	0.00437357	-0.220068	-0.109502	-0.152951	-0.18747	-0.152991	0.301207	-0.0493301	-0.0623917
0.0448281	-0.125038	-0.0440149	-0.0460068	-0.0949985	-0.132489	-0.168294	-0.172396	0.00118228	-0.216426	-0.0684728	-0.153523	-0.146856	-0.177826	0.308499	-0.0697877	-0.0818751
0.0107739	-0.123316	-0.0757762	-0.0412497	-0.0524821	-0.131891	-0.152083	-0.158861	0.0168804	-0.247044	-0.0796554	-0.16169	-0.160947	-0.202989	0.291742	0.0156418	-0.0742085
-0.034302	-0.134197	-0.0305856	-0.0300022	-0.0686112	-0.160591	-0.172942	-0.153546	0.000345224	-0.235483	-0.0879484	-0.164311	-0.183025	-0.180619	0.299683	-0.0114029	-0.0848895
-0.0322389	-0.111809	-0.0540322	-0.02904	-0.121817	-0.204432	-0.102011	-0.159733	0.00520245	-0.211191	-0.0833764	-0.159262	-0.157637	-0.187707	0.260329	-0.0849711	-0.098638
-0.0010956	-0.121809	-0.0412999	-0.0310673	-0.102848	-0.178222	-0.166731	-0.175435	0.00790327	-0.250176	-0.0866619	-0.176887	-0.178696	-0.199995	0.270855	-0.0566756	-0.0800526
-0.0126542	-0.115423	-0.0542112	-0.019963	-0.0983807	-0.170727	-0.134784	-0.179748	-0.0267366	-0.245167	-0.0733219	-0.143623	-0.162089	-0.194081	0.194098	-0.0368122	-0.0715012
-0.0272651	-0.131663	-0.025245	-0.0175195	-0.12003	-0.198703	-0.155578	-0.134467	-0.00417685	-0.256839	-0.0924017	-0.173546	-0.174208	-0.174119	0.241059	-0.0772408	-0.0783995
-0.0414802	-0.126496	-0.0398352	-0.00589595	-0.0744981	-0.193406	-0.144203	-0.13476	-0.015845	-0.238429	-0.107444	-0.135949	-0.165748	-0.191414	0.306099	-0.13416	-0.0544047
0.061078	-0.136278	-0.00614769	-0.0417231	-0.119232	-0.185355	-0.144399	-0.170699	-0.00398394	-0.262011	-0.142338	-0.179832	-0.137683	-0.182314	0.282553	-0.098734	-0.0618407
0.0073261	-0.179261	-0.0288148	-0.0370385	-0.127145	-0.197007	-0.162239	-0.172488	-0.0112314	-0.283517	-0.13733	-0.122485	-0.132728	-0.146742	0.297581	-0.0581413	-0.0570782
0.00483915	-0.131829	-0.0213784	-0.0260296	-0.122917	-0.185897	-0.143859	-0.129709	0.000281464	-0.253086	-0.109443	-0.184978	-0.160001	-0.162091	0.293359	-0.0559117	-0.053772
-0.0770322	-0.147257	-0.0427198	-0.0235213	-0.12188	-0.179418	-0.182345	-0.144253	0.0032782	-0.267455	-0.145208	-0.162902	-0.116194	-0.176786	0.268512	-0.0423638	-0.0717666
-0.0282542	-0.168067	-0.0227984	-0.0377792	-0.120764	-0.182463	-0.142599	-0.133507	0.00591199	-0.268573	-0.161398	-0.144936	-0.175154	-0.160984	0.227857	-0.085786	-0.0749157
0.0621802	-0.166919	-0.0318572	-0.0192376	-0.125071	-0.1441	-0.174939	-0.166008	0.0105681	-0.235532	-0.117756	-0.185723	-0.119387	-0.228739	0.267544	-0.109401	-0.08776
-0.0234216	-0.150176	0.00569451	-0.0305729	-0.109421	-0.202513	-0.116896	-0.163707	0.0163393	-0.254576	-0.117954	-0.0890493	-0.103878	-0.142582	0.243367	-0.0790403	-0.0992023
-0.036365	-0.191509	0.0101333	-0.0308173	-0.12697	-0.164957	-0.151953	-0.153186	0.000785006	-0.262024	-0.126247	-0.17419	-0.220766	-0.18582	0.214521	-0.0979756	-0.0735217
-0.00948905	-0.18706	0.00460189	-0.047301	-0.131516	-0.185688	-0.153303	-0.163305	0.00641063	-0.287195	-0.118092	-0.130408	-0.112105	-0.1905	0.24716	-0.0608068	-0.0871682
-0.0254846	-0.16381	0.00677535	-0.00966231	-0.0576351	-0.198578	-0.156576	-0.186605	-0.00608312	-0.27009	-0.116054	-0.125258	-0.138236	-0.263455	0.212773	-0.034475	-0.0753177
0.0547476	-0.166945	0.0118805	-0.0287747	-0.107889	-0.185688	-0.138254	-0.168758	0.0226368	-0.253805	-0.126504	-0.151121	-0.141226	-0.149929	0.245653	-0.0407849	-0.0937062
-0.0270107	-0.179287	0.00415212	-0.029922	-0.0789811	-0.204891	-0.169227	-0.199293	0.0151376	-0.268102	-0.110888	-0.128872	-0.160904	-0.229779	0.253725	-0.0343619	-0.0940532
0.0533629	-0.187729	-0.00500798	-0.0523025	-0.0840703	-0.200233	-0.13782	-0.172128	-0.00144987	-0.274765	-0.122743	-0.176513	-0.163857	-0.175746	0.242846	-0.0889947	-0.0995493
0.0102087	-0.140704	0.016769	-0.0330431	-0.109293	-0.223885	-0.174636	-0.177133	0.00115939	-0.273496	-0.106672	-0.149165	-0.149017	-0.156824	0.295425	-0.114138	-0.0729156
-0.00770862	-0.150343	0.0161945	-0.0596729	-0.113281	-0.234828	-0.162042	-0.196074	0.00747493	-0.283602	-0.144495	-0.155257	-0.134969	-0.173926	0.291033	-0.0823056	-0.101502
-0.0191542	-0.202559	0.0099755	-0.0391117	-0.0790449	-0.179793	-0.194431	-0.147313	0.00348419	-0.279712	-0.109958	-0.130084	-0.11698	-0.129447	0.234663	-0.0335469	-0.0888285
-0.0359694	-0.14819	0.0248813	-0.0609462	-0.0954931	-0.216543	-0.141576	-0.169894	0.00466785	-0.274641	-0.163041	-0.165376	-0.169996	-0.188034	0.269982	-0.0845862	-0.0959308
-0.0242412	-0.149531	0.0408467	-0.0282421	-0.0984924	-0.1962	-0.186035	-0.179903	-0.00143026	-0.274801	-0.1078	-0.11333	-0.129026	-0.158057	0.212252	-0.121155	-0.0936715
-0.00219777	-0.180386	0.0571724	-0.0440673	-0.0981254	-0.152707	-0.190634	-0.146999	-0.00442535	-0.286064	-0.158765	-0.15184	-0.147881	-0.171519	0.245153	-0.0669582	-0.109264
0.00924783	-0.157831	0.0569134	-0.0526213	-0.120157	-0.202263	-0.183318	-0.149502	0.0111828	-0.298534	-0.141507	-0.144637	-0.120645	-0.135628	0.222777	-0.14107	-0.0889366
0.037226	-0.164743	0.0237792	-0.061559	-0.154585	-0.195227	-0.19137	-0.163908	0.0124221	-0.277649	-0.117498	-0.142483	-0.119976	-0.117553	0.244742	-0.0844787	-0.0921959
0.0219369	-0.1541	0.052046	-0.0487671	-0.0751841	-0.190778	-0.207368	-0.166231	0.00664278	-0.267206	-0.144198	-0.158202	-0.158859	-0.126259	0.293472	-0.101405	-0.1087
0.0219369	-0.17644	0.0126011	-0.0572982	-0.0805126	-0.194504	-0.177132	-0.178964	0.00204386	-0.276109	-0.132699	-0.117958	-0.140403	-0.182112	0.233788	-0.132745	-0.104666
0.0135152	-0.192442	0.032791	-0.0436091	-0.0792364	-0.219268	-0.165152	-0.162479	0.0200684	-0.274778	-0.127751	-0.115211	-0.147562	-0.154937	0.266335	-0.100584	-0.111284
0.0245652	-0.173426	0.0285335	-0.0682117	-0.104443	-0.160924	-0.21182	-0.170095	0.0255158	-0.28829	-0.0949549	-0.131742	-0.139494	-0.180812	0.216772	-0.105593	-0.121544
-0.027152	-0.140538	0.0213891	-0.0611161	-0.112739	-0.192724	-0.182975	-0.186178	0.0198183	-0.281441	-0.124248	-0.148475	-0.17602	-0.11944	0.222554	-0.0797477	-0.093896
-0.00799123	-0.181606	0.0434275	-0.0603754	-0.118993	-0.171909	-0.196149	-0.177623	0.0110292	-0.289222	-0.127691	-0.152383	-0.13788	-0.170672	0.219561	-0.141884	-0.0911551
0.00856957	-0.129774	0.026718	-0.0420266	-0.115371	-0.224177	-0.20867	-0.169135	-0.0046477	-0.280061	-0.146672	-0.105311	-0.169487	-0.152076	0.231483	-0.0945462	-0.103503
-0.0121173	-0.160056	0.034842	-0.0333256	-0.0614959	-0.195311	-0.173613	-0.170007	-0.00237522	-0.289173	-0.122387	-0.108799	-0.155237	-0.147522	0.220509	-0.094218	-0.0987533
-0.0319563	-0.114346	0.047619	-0.034597	-0.0929086	-0.237747	-0.165479	-0.19947	0.0161006	-0.29581	-0.106415	-0.146493	-0.170076	-0.164624	0.186586	-0.174645	-0.0985023
-0.0248064	-0.159554	0.0332431	-0.0461022	-0.112914	-0.213971	-0.176371	-0.189732	0.00192452	-0.27894	-0.137033	-0.145824	-0.178813	-0.115339	0.257352	-0.094982	-0.105917
0.00263482	-0.141256	0.0221898	-0.0316897	-0.0883778	-0.208367	-0.194235	-0.182338	0.00665259	-0.295424	-0.135826	-0.148252	-0.119147	-0.174052	0.242622	-0.102492	-0.106054
-0.0609236	-0.149077	0.0539393	-0.0426031	-0.0859847	-0.215653	-0.198793	-0.153077	0.00263406	-0.294976	-0.106454	-0.152732	-0.132845	-0.107664	0.21294	-0.0882873	-0.106319
-0.0216129	-0.172708	-0.0074075	-0.0419369	-0.108623	-0.158129	-0.172705	-0.176261	0.00183787	-0.304389	-0.0742917	-0.133774	-0.133434	-0.124574	0.222685	-0.124041	-0.0953114
-0.051541	-0.148503	0.0378396	-0.0601979	-0.115674	-0.200358	-0.222434	-0.184145	0.00841989	-0.322959	-0.1326	-0.0910562	-0.118202	-0.155197	0.21653	-0.0589053	-0.0993452
-0.0461715	-0.130205	0.0280037	-0.0546791	-0.114813	-0.212177	-0.165782	-0.158526	0.00830218	-0.28287	-0.146296	-0.131397	-0.15827	-0.111766	0.202784	-0.0924807	-0.0993656
-0.0129369	-0.124654	0.0249048	-0.0632541	-0.147087	-0.22401	-0.175634	-0.190244	-0.0201562	-0.273248	-0.113995	-0.0972159	-0.153032	-0.139529	0.166723	-0.0918242	-0.0914
-0.00660645	-0.17443	0.0185281	-0.0323712	-0.172932	-0.208075	-0.19241	-0.226522	-0.00392018	-0.303343	-0.110888	-0.112834	-0.15819	-0.164431	0.20044	-0.130838	-0.105121
-0.000812996	-0.158572	0.0278789	-0.0661023	-0.123651	-0.251263	-0.174571	-0.186471	-0.0149703	-0.267938	-0.129037	-0.14006	-0.14591	-0.158384	0.173622	-0.0434503	-0.0808006
-0.0354042	-0.128985	0.0132651	-0.0423072	-0.170284	-0.180474	-0.189218	-0.214928	-0.00834089	-0.298942	-0.140378	-0.156641	-0.127571	-0.111506	0.185898	-0.0359407	-0.117442
0.0739084	-0.129631	0.044791	-0.0520887	-0.122487	-0.240932	-0.169162	-0.177824	-0.0171006	-0.322475	-0.0619215	-0.124665	-0.169168	-0.19154	0.184594	-0.0980832	-0.10557
-0.029752	-0.163618	0.0170069	-0.0379262	-0.111814	-0.194852	-0.189137	-0.187096	-0.00829348	-0.31048	-0.0853358	-0.15142	-0.130678	-0.153896	0.201259	-0.0580338	-0.111414
0.0157195	-0.191342	0.00732872	-0.0359447	-0.120349	-0.165304	-0.199791	-0.216672	-0.015124	-0.292505	-0.0819118	-0.134439	-0.166221	-0.0829629	0.221515	-0.0911734	-0.115346
0.000854388	-0.138552	-0.0155998	-0.0475015	-0.134324	-0.188191	-0.195388	-0.214279	-0.013991	-0.318411	-0.126821	-0.103232	-0.160234	-0.0907633	0.193559	-0.11729	-0.127823
0.0361238	-0.152401	-0.00300406	-0.0335547	-0.146289	-0.201665	-0.18651	-0.199696	-0.00160519	-0.301205	-0.116212	-0.136542	-0.11698	-0.0833487	0.170609	-0.0626064	-0.095345
-0.0041195	-0.145274	-0.00788081	-0.0237064	-0.147646	-0.192126	-0.172337	-0.204742	0.00940573	-0.315799	-0.0847025	-0.134565	-0.189202	-0.115792	0.198526	-0.0895379	-0.118468
-0.00454341	-0.148692	-0.0158353	-0.0673087	-0.111016	-0.174203	-0.198162	-0.196678	-0.0121665	-0.291485	-0.0962414	-0.134119	-0.141146	-0.157604	0.193616	-0.102112	-0.125244
-0.049478	-0.170937	-0.00357863	-0.0488549	-0.13016	-0.189165	-0.187287	-0.166411	-0.00404116	-0.311026	-0.0982603	-0.169486	-0.190264	-0.131661	0.19609	-0.0878006	-0.125108
-0.0922083	-0.133193	-0.0189789	-0.056653	-0.103406	-0.21468	-0.162697	-0.234184	-0.0126226	-0.279002	-0.103149	-0.14117	-0.18747	-0.156304	0.1617	-0.0515598	-0.113666
0.0131196	-0.163021	-0.00797265	-0.049691	-0.0407562	-0.180474	-0.152607	-0.226208	-0.00211854	-0.309434	-0.113263	-0.184953	-0.128946	-0.192907	0.18387	-0.0197784	-0.0887121
-0.0239585	-0.141014	-0.0189907	-0.0305863	-0.0737004	-0.197646	-0.179456	-0.215041	-0.00922536	-0.293374	-0.105999	-0.138377	-0.110803	-0.171972	0.222108	-0.0180411	-0.086957
-0.0163847	-0.158213	0.0102016	-0.0280722	-0.108687	-0.226721	-0.18421	-0.228622	-0.0173376	-0.317578	-0.0831191	-0.14736	-0.182159	-0.0892032	0.187274	-0.0727814	-0.0972094
0.0293695	-0.142091	0.026685	-0.0554923	-0.11242	-0.21176	-0.211206	-0.21142	-0.0133453	-0.300037	-0.10115	-0.158274	-0.163304	-0.0937493	0.201351	-0.0728323	-0.097141
-0.0201151	-0.15319	-0.0163886	-0.0639929	-0.134643	-0.187468	-0.205896	-0.247652	-0.0162488	-0.305233	-0.101288	-0.14595	-0.194126	-0.117092	0.18906	-0.0411641	-0.0771607
-0.0391346	-0.123124	0.0153044	-0.038098	-0.0869579	-0.211551	-0.187115	-0.248368	-0.0153545	-0.322551	-0.0755188	-0.141814	-0.177045	-0.101944	0.179964	-0.115275	-0.0765423
-0.0504389	-0.140036	-0.0230692	-0.0684694	-0.123284	-0.183478	-0.211689	-0.203557	-0.0216684	-0.274467	-0.120744	-0.129293	-0.13729	-0.112672	0.204347	-0.0497093	-0.0874131
-0.0227433	-0.14226	-0.00306057	-0.0645637	-0.140163	-0.254836	-0.207017	-0.218503	-0.0157976	-0.318611	-0.107681	-0.166146	-0.148587	-0.0714552	0.172097	-0.0241868	-0.0888009
0.0211173	-0.173664	-0.0102827	-0.036735	-0.0927969	-0.191459	-0.199054	-0.215443	-0.0258455	-0.317192	-0.10115	-0.145058	-0.152087	-0.123399	0.177677	-0.11729	-0.0598681
-0.0250607	-0.149723	-0.0283533	-0.0429066	-0.138313	-0.225372	-0.209103	-0.195362	-0.0197049	-0.305471	-0.114549	-0.14048	-0.122727	-0.0670936	0.181042	-0.0413282	-0.0773178
0.00249351	-0.138457	-0.00522226	-0.0528141	-0.133479	-0.20528	-0.212336	-0.19936	-0.0110679	-0.328344	-0.169691	-0.168148	-0.13131	-0.0749612	0.145818	-0.112287	-0.0736299
-0.056091	-0.141422	-0.0383588	-0.0384741	-0.107331	-0.243295	-0.17759	-0.227079	-0.0301469	-0.308044	-0.121417	-0.134788	-0.161966	-0.0253487	0.19263	-0.0376271	-0.0748891
0.0071848	-0.133098	-0.0074546	-0.0318825	-0.106038	-0.233924	-0.183727	-0.194243	-0.0271093	-0.304909	-0.106138	-0.158522	-0.0981311	-0.0608533	0.15986	-0.0380629	-0.0942093
-0.102128	-0.10949	-0.0202199	-0.0603907	-0.0954931	-0.208409	-0.200724	-0.239118	-0.0237954	-0.325719	-0.0914715	-0.16352	-0.0481109	-0.0454453	0.141465	-0.0357766	-0.0706777
-0.0254846	-0.146637	-0.0207262	-0.0233285	-0.0548752	-0.206031	-0.172034	-0.214346	-0.0402259	-0.311673	-0.0860088	-0.132015	-0.163071	-0.0717152	0.145875	-0.0167904	-0.0637254
0.00209786	-0.165868	-0.0124326	-0.0237866	-0.0966577	-0.179112	-0.231288	-0.214614	-0.0325077	-0.304785	-0.086563	-0.116919	-0.160431	-0.0747011	0.189766	-0.0291385	-0.0713921
-0.0174868	-0.119415	-0.040431	-0.0276713	-0.1166	-0.216001	-0.210642	-0.240081	-0.0411824	-0.336014	-0.11445	-0.128948	-0.110054	-0.0764541	0.171055	-0.0192917	-0.0711063
-0.00329994	-0.134654	-0.0458164	-0.027782	-0.105991	-0.198954	-0.188572	-0.229066	-0.0518172	-0.312804	-0.107582	-0.147583	-0.186488	-0.0676136	0.135644	-0.0417073	-0.064603
-0.0645127	-0.164264	-0.00719557	-0.046694	-0.073158	-0.238888	-0.193523	-0.21935	-0.0334248	-0.318461	-0.119794	-0.151049	-0.113597	-0.0568189	0.124485	-0.0393701	-0.0709094
0.0535042	-0.143024	-0.0263494	-0.0385485	-0.0521152	-0.232742	-0.190479	-0.177514	-0.0463486	-0.32393	-0.122605	-0.165649	-0.143117	-0.0347176	0.141706	-0.0826848	-0.0621264
-0.0294977	-0.150415	-0.0419969	-0.0393178	-0.0624212	-0.188066	-0.215159	-0.209969	-0.0122286	-0.320834	-0.0931142	-0.159809	-0.0887251	-0.0563659	0.115019	-0.0127045	-0.0693032
0.00331307	-0.155033	-0.049332	-0.0530203	-0.0667766	-0.252625	-0.170381	-0.223529	-0.0142755	-0.324352	-0.111086	-0.154613	-0.129063	-0.0523399	0.131088	-0.0682654	-0.0737319
0.00181525	-0.155007	-0.0209075	-0.0409901	-0.109724	-0.258215	-0.193956	-0.236259	-0.0246815	-0.324352	-0.106157	-0.168148	-0.161966	-0.0393979	0.121638	-0.094003	-0.0499963
-0.0168086	-0.141614	-0.0286924	-0.0333314	-0.0894786	-0.246188	-0.202221	-0.192369	-0.017918	-0.310777	-0.0686311	-0.173273	-0.0956937	-0.0843217	0.129097	-0.05564	-0.0796577
-0.0569106	-0.146014	-0.0343933	-0.0303286	-0.12531	-0.206796	-0.202835	-0.206306	-0.0155703	-0.303147	-0.126445	-0.161938	-0.108642	-0.0311361	0.136481	-0.0473664	-0.0714053
-0.0148586	-0.147498	-0.0139656	-0.0306836	-0.102305	-0.201248	-0.19178	-0.198376	-0.0255725	-0.302947	-0.117182	-0.145159	-0.1197	-0.00318041	0.0985388	-0.0788196	-0.0567252
0.0471738	-0.13922	-0.0183714	-0.00320243	-0.0834002	-0.245465	-0.192091	-0.184548	-0.0102177	-0.335007	-0.0889381	-0.186833	-0.14052	-0.0297103	0.110386	-0.0448142	-0.0821608
-0.0187303	-0.153047	-0.0211759	-0.0429066	-0.11108	-0.206837	-0.206697	-0.17738	-0.0345529	-0.331028	-0.0986759	-0.127286	-0.105965	-0.00500051	0.102743	-0.0316455	-0.0619764
0.0408151	-0.123147	-0.0419875	-0.0196595	-0.117397	-0.212358	-0.203833	-0.19449	-0.0243235	-0.339643	-0.090185	-0.134763	-0.119227	-0.0488926	0.123984	-0.0475871	-0.0800863
-0.0636649	-0.1286	-0.0316782	-0.0188443	-0.0427185	-0.219685	-0.206845	-0.199805	-0.0405268	-0.321282	-0.0791408	-0.20718	-0.163501	-0.0751541	0.0679835	-0.133667	-0.079474
-0.00301733	-0.13329	-0.0306633	-0.0115197	-0.156978	-0.188914	-0.191894	-0.182225	-0.0566238	-0.351204	-0.100774	-0.14996	-0.115212	-0.041998	0.0846458	-0.0395852	-0.0893856
0.0204108	-0.128075	-0.0524097	-0.0297578	-0.123587	-0.225414	-0.170422	-0.166545	-0.0402832	-0.338747	-0.09733	-0.127286	-0.11407	-0.0490184	0.104735	-0.101835	-0.0629223
0.0342021	-0.183521	-0.0295825	-0.00712531	-0.128437	-0.225331	-0.162026	-0.200006	-0.0516096	-0.326912	-0.0975477	-0.150355	-0.13729	-0.135947	0.103115	-0.0583054	-0.0742085
-0.00465646	-0.14092	-0.069084	-0.00659272	-0.13292	-0.235412	-0.188588	-0.209948	-0.0605524	-0.348382	-0.114708	-0.127286	-0.097775	-0.028796	0.135087	-0.0882364	-0.0903183
-0.0438259	-0.15197	-0.0750675	-0.010277	-0.206068	-0.223162	-0.173597	-0.195563	-0.070499	-0.313252	-0.0777356	-0.149042	-0.134024	-0.0901762	0.0765765	-0.0868725	-0.0783587
0.0131196	-0.163259	-0.0465605	-0.0271387	-0.0308171	-0.257631	-0.214079	-0.17499	-0.082571	-0.335278	-0.103881	-0.109417	-0.134693	-0.0333505	0.0887395	-0.0241359	-0.0908755
-0.00177386	-0.10571	-0.0395762	0.00497169	-0.124704	-0.243462	-0.198858	-0.150776	-0.0804178	-0.310182	-0.0865234	-0.149463	-0.129106	-0.0297103	0.0768716	-0.0865499	-0.116822
-0.0336237	-0.123339	-0.0308776	-0.00734675	-0.118323	-0.180558	-0.188981	-0.17043	-0.100313	-0.325434	-0.0692051	-0.185424	-0.153745	-0.0254829	0.055094	-0.0709309	-0.114088
-0.0320976	-0.138718	-0.0365903	0.00123588	-0.141998	-0.240876	-0.205044	-0.238606	-0.088983	-0.345845	-0.107998	-0.152556	-0.123083	-0.05442	0.105887	-0.138619	-0.11485
-0.0629866	-0.131161	-0.0575361	-0.0265546	-0.102305	-0.259327	-0.222515	-0.234406	-0.0680042	-0.335913	-0.129176	-0.182529	-0.0932501	-0.0626734	0.0912676	-0.0604276	-0.115407
-0.0516823	-0.158451	-0.0352269	-0.0349158	-0.128198	-0.252709	-0.224299	-0.182292	-0.0605851	-0.335713	-0.110472	-0.158892	-0.0821126	-0.0594861	0.0778033	-0.145263	-0.110564
-0.0184477	-0.120707	-0.06096	-0.0148413	-0.104571	-0.251986	-0.220502	-0.177623	-0.042487	-0.335841	-0.118785	-0.17191	-0.103246	-0.0672278	0.106259	-0.104614	-0.110768
0.0259217	-0.172516	-0.0578611	-0.0172466	-0.155447	-0.233632	-0.22506	-0.17528	-0.0437916	-0.332856	-0.106811	-0.143573	-0.098917	-0.0238557	0.0847588	-0.15859	-0.114442
0.0393173	-0.129272	-0.0419522	-0.0140872	-0.123843	-0.257715	-0.232458	-0.204855	-0.0523731	-0.341023	-0.119121	-0.157655	-0.100691	-0.0678737	0.132798	-0.0910659	-0.106217
0.0307543	-0.123434	-0.0477096	-0.0195029	-0.101013	-0.247745	-0.207238	-0.183856	-0.0535993	-0.334758	-0.0990717	-0.176959	-0.128867	-0.0323775	0.0935365	-0.154023	-0.131836
0.00828696	-0.122573	-0.0754843	-0.00974439	-0.155559	-0.244825	-0.200339	-0.183231	-0.0505012	-0.336524	-0.124762	-0.143476	-0.10801	-0.0588403	0.125193	-0.0879647	-0.117149
-0.0253433	-0.142378	-0.0674497	-0.0227443	-0.0807041	-0.237233	-0.195691	-0.187541	-0.0559535	-0.361832	-0.133253	-0.186265	-0.14591	-0.0104021	0.0688767	-0.118326	-0.147137
-0.0566562	-0.175171	-0.0866271	-0.0214348	-0.116408	-0.269325	-0.156797	-0.212292	-0.0464172	-0.335331	-0.0982207	-0.16461	-0.115918	-0.0661207	0.0931644	-0.0966118	-0.137116
0.00359568	-0.170053	-0.086401	-0.0303057	-0.065245	-0.260509	-0.204283	-0.202957	-0.0438554	-0.329014	-0.13739	-0.173298	-0.111829	-0.0442711	0.0912112	-0.153474	-0.142694
-0.0460302	-0.16338	-0.0658391	-0.0186382	-0.148268	-0.278015	-0.189267	-0.197214	-0.0351398	-0.359583	-0.143248	-0.205123	-0.074438	-0.0509727	0.115707	-0.167514	-0.133408
-0.00329994	-0.125541	-0.0713493	-0.0179051	-0.107091	-0.208798	-0.189898	-0.179522	-0.0476777	-0.347898	-0.103327	-0.123205	-0.162162	-0.0646864	0.122477	-0.133017	-0.141395
-0.0228564	-0.131614	-0.0363643	-0.0251343	-0.133718	-0.25809	-0.176068	-0.197772	-0.0479442	-0.353155	-0.0971717	-0.146198	-0.164293	-0.0524657	0.0842198	-0.101292	-0.135918
-0.00465646	-0.106763	-0.0573783	-0.0236912	-0.116536	-0.234522	-0.183948	-0.18609	-0.0521884	-0.330891	-0.10301	-0.172553	-0.158583	-0.0679408	0.0829544	-0.139926	-0.148538
0.0284086	-0.147234	-0.0518893	-0.0119645	-0.0800819	-0.266572	-0.186444	-0.201683	-0.0505044	-0.337269	-0.132343	-0.228263	-0.101318	-0.0398508	0.0852233	-0.0974833	-0.150681
0.0253847	-0.146158	-0.069635	-0.0258597	-0.112117	-0.264236	-0.223497	-0.21209	-0.0544232	-0.320573	-0.135529	-0.181267	-0.12875	-0.106364	0.0735427	-0.114845	-0.147375
0.0180652	-0.104705	-0.0420204	-0.0438249	-0.13911	-0.233034	-0.207671	-0.207982	-0.0712919	-0.32224	-0.0919069	-0.166638	-0.0700297	-0.0538329	0.0392864	-0.0933465	-0.159403
-0.0507215	-0.14776	-0.0680361	-0.0302465	-0.0728549	-0.232909	-0.215183	-0.199604	-0.0650434	-0.353976	-0.130067	-0.177531	-0.10486	-0.000127338	0.0154042	-0.163813	-0.167715
-0.00329994	-0.123219	-0.0534011	-0.0339899	-0.088984	-0.224399	-0.200986	-0.240974	-0.0740598	-0.340339	-0.127474	-0.153275	-0.109109	-0.122753	0.0262096	-0.131602	-0.178519
-0.0195499	-0.162447	-0.0881247	-0.0261919	-0.0826664	-0.241057	-0.204005	-0.218436	-0.0555104	-0.322724	-0.129037	-0.158942	-0.0832546	-0.0699538	0.0571576	-0.170129	-0.169919
-0.0257672	-0.0957125	-0.0816915	-0.029691	-0.090037	-0.241057	-0.225388	-0.231392	-0.0550347	-0.332257	-0.128919	-0.169263	-0.1552	-0.0819815	-0.0451161	-0.122734	-0.20486
-0.0290737	-0.0989186	-0.0833351	-0.0463542	-0.0928448	-0.256185	-0.214013	-0.216269	-0.0618358	-0.331662	-0.125	-0.150183	-0.155513	-0.0784084	0.00450645	-0.146078	-0.181118
0.0595802	-0.0894696	-0.0640918	-0.0420782	-0.155447	-0.246897	-0.186379	-0.198958	-0.051039	-0.327275	-0.108374	-0.186514	-0.122217	-0.104871	0.0190693	-0.195159	-0.202703
-0.0257672	-0.142642	-0.0625047	-0.0380006	-0.0702704	-0.229864	-0.202786	-0.195764	-0.0555252	-0.332944	-0.130542	-0.142285	-0.140913	-0.145836	-0.00938653	-0.129316	-0.201935
-0.00163256	-0.127932	-0.068069	-0.0513709	-0.121625	-0.26945	-0.212884	-0.196791	-0.0636701	-0.332097	-0.1193	-0.149934	-0.104351	-0.123534	-0.00981515	-0.201033	-0.202084
-0.0452106	-0.104754	-0.059281	-0.0550266	-0.10347	-0.231768	-0.220412	-0.233849	-0.062856	-0.333068	-0.14877	-0.177775	-0.12584	-0.141936	0.0192541	-0.157068	-0.205132
-0.0646258	-0.130133	-0.0608587	-0.0229295	-0.130894	-0.235161	-0.195953	-0.18218	-0.0583044	-0.320239	-0.153916	-0.222596	-0.122653	-0.0712538	0.00385453	-0.104614	-0.21786
-0.0101956	-0.113437	-0.0711444	-0.0265107	-0.145316	-0.22604	-0.188834	-0.194356	-0.0580347	-0.328282	-0.138993	-0.153995	-0.123832	-0.114886	-0.00114776	-0.18727	-0.223262
-0.0436846	-0.0955919	-0.0853767	-0.0374012	-0.131883	-0.228334	-0.20331	-0.194267	-0.0514576	-0.34183	-0.132343	-0.146716	-0.154887	-0.108386	-0.00349106	-0.101835	-0.225997
-0.0366476	-0.138144	-0.0658508	-0.0550857	-0.130097	-0.217016	-0.227965	-0.198421	-0.0364477	-0.322936	-0.179448	-0.171935	-0.189717	-0.1197	0.0074991	-0.135903	-0.226773
-0.0331998	-0.11633	-0.0867495	-0.0453482	-0.147279	-0.259202	-0.214701	-0.221786	-0.0608058	-0.305769	-0.149226	-0.168817	-0.0964795	-0.133808	0.0333704	-0.124149	-0.232208
-0.014039	-0.0869093	-0.0723171	-0.061914	-0.180287	-0.228167	-0.210625	-0.229246	-0.055942	-0.316348	-0.130067	-0.178073	-0.118478	-0.129707	0.00273806	-0.158211	-0.230514
0.0156065	-0.0997079	-0.0821083	-0.0640311	-0.140036	-0.226387	-0.205462	-0.19288	-0.069711	-0.316185	-0.0987749	-0.195299	-0.128713	-0.122821	-0.0093121	-0.164849	-0.246725
0.0490955	-0.124582	-0.0724631	-0.0532875	-0.140036	-0.264542	-0.190912	-0.216336	-0.05236	-0.341892	-0.0940841	-0.203541	-0.117692	-0.138874	-0.0229459	-0.183513	-0.249718
0.032676	-0.117383	-0.102941	-0.0629277	-0.13777	-0.239319	-0.199685	-0.190202	-0.0671917	-0.303817	-0.102179	-0.179437	-0.09931	-0.148956	0.00136237	-0.16039	-0.238473
0.0153239	-0.093488	-0.0856239	-0.0617442	-0.140961	-0.226805	-0.201141	-0.189842	-0.0633906	-0.332359	-0.0995072	-0.188668	-0.137646	-0.181986	-0.0021513	-0.168607	-0.255019
0.00249351	-0.0674888	-0.0880564	-0.0481448	-0.133223	-0.265849	-0.226689	-0.211713	-0.0621203	-0.299155	-0.0950143	-0.167479	-0.141146	-0.163911	-0.0122509	-0.0815417	-0.240848
-0.0489128	-0.116069	-0.114399	-0.0606713	-0.136478	-0.2327	-0.205306	-0.191472	-0.0719442	-0.33125	-0.0795961	-0.177876	-0.0983276	-0.155331	-0.0279302	-0.121863	-0.252243
0.030613	-0.0981293	-0.101848	-0.0740645	-0.159308	-0.260551	-0.251344	-0.177891	-0.0661094	-0.340552	-0.0761918	-0.161492	-0.0744748	-0.18634	-0.0108187	-0.188085	-0.263311
-0.0530671	-0.0718172	-0.106996	-0.0695422	-0.111383	-0.220492	-0.214267	-0.223194	-0.057657	-0.318212	-0.0926392	-0.200175	-0.130481	-0.0986979	-0.020659	-0.108479	-0.248106
-0.0174868	-0.0854024	-0.114298	-0.0720506	-0.138504	-0.292129	-0.186534	-0.223349	-0.0615137	-0.336884	-0.0886214	-0.21151	-0.132176	-0.110264	-0.0626152	-0.0947613	-0.274781
0.0446868	-0.112122	-0.11565	-0.0583844	-0.124082	-0.250971	-0.212818	-0.218302	-0.0453399	-0.311026	-0.0648705	-0.188693	-0.111473	-0.114299	-0.0175509	-0.0604842	-0.250202
-0.0580127	-0.110997	-0.113521	-0.0516897	-0.103167	-0.230156	-0.203506	-0.20043	-0.0413704	-0.320177	-0.106395	-0.183026	-0.081953	-0.136148	-0.0490943	-0.128608	-0.273638
-0.0038369	-0.11724	-0.123119	-0.0576304	-0.130463	-0.246146	-0.180102	-0.21484	-0.0628805	-0.335442	-0.105781	-0.1606	-0.0888049	-0.230819	-0.110469	-0.119197	-0.238289
0.00209786	-0.116617	-0.0869991	-0.0739901	-0.11518	-0.271577	-0.228121	-0.197772	-0.0522227	-0.323407	-0.144357	-0.203713	-0.113873	-0.145769	-0.0914432	-0.0817567	-0.245637
-0.0101956	-0.121307	-0.117778	-0.059421	-0.17968	-0.276583	-0.236067	-0.275773	-0.0667535	-0.291073	-0.101546	-0.164311	-0.104111	-0.165538	-0.0956652	-0.149343	-0.258794
-0.0395585	-0.128672	-0.084383	-0.0576227	-0.180175	-0.235578	-0.231615	-0.20253	-0.0686745	-0.31457	-0.109562	-0.162186	-0.104504	-0.165991	-0.103663	-0.0584696	-0.262107
-0.0194086	-0.103413	-0.0993005	-0.0470128	-0.160041	-0.252709	-0.218678	-0.203024	-0.0606423	-0.324401	-0.0937278	-0.191487	-0.0937596	-0.163198	-0.103421	-0.0795836	-0.264713
0.0041609	-0.073947	-0.10134	-0.0412268	-0.127464	-0.279378	-0.203244	-0.249752	-0.0725998	-0.325421	-0.0705312	-0.198345	-0.12824	-0.177566	-0.0710978	-0.117511	-0.263556
0.0227565	-0.1148	-0.0927448	-0.0495956	-0.123109	-0.278989	-0.200396	-0.230743	-0.0632794	-0.311797	-0.0655435	-0.15694	-0.0931702	-0.177239	-0.0939353	-0.120991	-0.249223
-0.00123691	-0.158141	-0.110872	-0.0389628	-0.172741	-0.256992	-0.239274	-0.238582	-0.0646478	-0.319654	-0.0558848	-0.162308	-0.0710918	-0.151296	-0.100519	-0.129372	-0.277101
0.00483915	-0.10461	-0.123256	-0.0417594	-0.204951	-0.241905	-0.184055	-0.224489	-0.0526265	-0.344243	-0.0808826	-0.163495	-0.128946	-0.0895303	-0.108165	-0.172144	-0.263379
0.0180652	-0.0849001	-0.119344	-0.052104	-0.19415	-0.297649	-0.209562	-0.20644	-0.0650402	-0.338165	-0.102793	-0.176365	-0.0584563	-0.169632	-0.116198	-0.163378	-0.26408
-0.0176281	-0.115351	-0.121261	-0.0368534	-0.169853	-0.260509	-0.236083	-0.203045	-0.0736216	-0.297873	-0.0942424	-0.204332	-0.133944	-0.158124	-0.138907	-0.140147	-0.259563
-0.0468498	-0.143431	-0.122782	-0.0656136	-0.196368	-0.266822	-0.197467	-0.198464	-0.0746957	-0.348506	-0.0918673	-0.183244	-0.133471	-0.123986	-0.168608	-0.141884	-0.26144
0.0245652	-0.0747105	-0.121181	-0.0329038	-0.160775	-0.268783	-0.182909	-0.208964	-0.0451633	-0.317862	-0.124347	-0.175128	-0.0718409	-0.19466	-0.120289	-0.163763	-0.245392
-0.0090934	-0.0914558	-0.107978	-0.0401616	-0.173794	-0.249622	-0.171404	-0.232218	-0.0519072	-0.305233	-0.119557	-0.182824	-0.127725	-0.139009	-0.156352	-0.14635	-0.262556
-0.0624214	-0.0989416	-0.128877	-0.0654437	-0.158877	-0.239944	-0.17885	-0.194892	-0.060948	-0.309721	-0.0869786	-0.155825	-0.128357	-0.170219	-0.120104	-0.126164	-0.26542
0.0176695	-0.0896361	-0.169956	-0.0587337	-0.20109	-0.281408	-0.205896	-0.21676	-0.0429398	-0.296608	-0.141982	-0.194756	-0.129106	-0.206822	-0.164945	-0.123277	-0.262556
-0.0508628	-0.104946	-0.127108	-0.0406713	-0.194342	-0.266947	-0.185119	-0.219551	-0.0602107	-0.285593	-0.0805461	-0.15882	-0.130285	-0.134068	-0.176364	-0.0488378	-0.253651
0.0311782	-0.132165	-0.118106	-0.0607534	-0.168577	-0.246813	-0.19128	-0.221002	-0.0493077	-0.327598	-0.105425	-0.184881	-0.0784902	-0.162024	-0.163475	-0.0736529	-0.239052
0.000713084	-0.0699028	-0.1418	-0.0428036	-0.154218	-0.304128	-0.191461	-0.216537	-0.0510619	-0.294381	-0.0975279	-0.187973	-0.111043	-0.178606	-0.157133	-0.114732	-0.249011
0.0594389	-0.0728218	-0.154925	-0.0518673	-0.120094	-0.286581	-0.162828	-0.214907	-0.055141	-0.287195	-0.0877901	-0.161046	-0.151264	-0.135687	-0.111419	-0.121919	-0.258971
-0.0543106	-0.0974117	-0.116787	-0.0530203	-0.14538	-0.256741	-0.180389	-0.218839	-0.0490265	-0.316793	-0.0924017	-0.153696	-0.122297	-0.159877	-0.172738	-0.126871	-0.250861
0.0620389	-0.0943979	-0.130624	-0.0613223	-0.197899	-0.271619	-0.202418	-0.221606	-0.0542974	-0.314645	-0.100536	-0.168174	-0.169604	-0.125219	-0.163457	-0.157068	-0.268311
-0.0224607	-0.110472	-0.146521	-0.0535242	-0.147279	-0.252584	-0.175634	-0.187452	-0.050596	-0.285668	-0.0854744	-0.181094	-0.140716	-0.157151	-0.122206	-0.12785	-0.248345
0.0406738	-0.0900666	-0.126522	-0.0572009	-0.191087	-0.265042	-0.204202	-0.22384	-0.0512908	-0.303232	-0.117281	-0.189088	-0.0728232	-0.200255	-0.137588	-0.141019	-0.276842
-0.00948905	-0.0758127	-0.15505	-0.0634756	-0.154697	-0.246229	-0.194235	-0.210506	-0.0546211	-0.295039	-0.119082	-0.155303	-0.125643	-0.204356	-0.153116	-0.124528	-0.27706
-0.0115521	-0.0711485	-0.127132	-0.0392071	-0.141886	-0.29256	-0.22862	-0.205724	-0.0587737	-0.307982	-0.133372	-0.151096	-0.123476	-0.187967	-0.155033	-0.153474	-0.259501
-0.0105912	-0.060072	-0.159884	-0.0592873	-0.142796	-0.247328	-0.201509	-0.215955	-0.0459349	-0.302797	-0.108453	-0.145874	-0.0952577	-0.209749	-0.15252	-0.116368	-0.253318
-0.0463128	-0.064188	-0.166598	-0.0684694	-0.159547	-0.242711	-0.228595	-0.21868	-0.046414	-0.302202	-0.144654	-0.166171	-0.145554	-0.172819	-0.150773	-0.145693	-0.258739
-0.029215	-0.0536856	-0.128966	-0.0673965	-0.198633	-0.259745	-0.212295	-0.201926	-0.0503589	-0.308365	-0.113164	-0.185474	-0.103915	-0.152269	-0.168664	-0.123606	-0.267489
-0.0039782	-0.0580628	-0.153338	-0.0605759	-0.18753	-0.280393	-0.22736	-0.213209	-0.0463093	-0.283926	-0.150017	-0.185201	-0.124735	-0.168139	-0.167104	-0.116854	-0.256882
-0.0187303	-0.10614	-0.176389	-0.0550266	-0.17759	-0.235801	-0.220674	-0.232395	-0.0532347	-0.288961	-0.123812	-0.178048	-0.133238	-0.165798	-0.182	-0.149722	-0.256991
0.0224739	-0.06182	-0.185752	-0.0471674	-0.228945	-0.238846	-0.212818	-0.215486	-0.0464418	-0.299377	-0.133115	-0.170698	-0.114113	-0.246613	-0.182929	-0.183298	-0.264958
-0.0227433	-0.0500518	-0.180253	-0.0662874	-0.195267	-0.280949	-0.183081	-0.233782	-0.0448935	-0.298994	-0.135529	-0.121619	-0.12277	-0.185694	-0.173946	-0.112231	-0.252195
-0.0355455	-0.0942773	-0.178485	-0.0831416	-0.160105	-0.256519	-0.20029	-0.227951	-0.0358167	-0.296644	-0.148711	-0.210841	-0.106751	-0.196547	-0.190611	-0.174373	-0.225983
-0.00728471	-0.0413433	-0.155038	-0.0734937	-0.192986	-0.259911	-0.226902	-0.231346	-0.0414505	-0.300982	-0.13925	-0.14518	-0.135718	-0.141995	-0.177016	-0.205334	-0.247427
-0.0421585	-0.069211	-0.210832	-0.0816411	-0.196926	-0.244867	-0.227032	-0.223102	-0.0514756	-0.319827	-0.137548	-0.13714	-0.114819	-0.22353	-0.185609	-0.192545	-0.253086
-0.0815822	-0.0320148	-0.185144	-0.0784074	-0.202382	-0.214805	-0.215748	-0.208808	-0.0622772	-0.292292	-0.130126	-0.206907	-0.162561	-0.199995	-0.164219	-0.127086	-0.251134
0.0200152	-0.0617224	-0.196421	-0.0744119	-0.14605	-0.282729	-0.205568	-0.216379	-0.0668532	-0.289968	-0.133253	-0.169116	-0.1256	-0.209355	-0.237239	-0.157068	-0.249256
0.000854388	-0.0833702	-0.175219	-0.0643193	-0.17373	-0.240459	-0.209954	-0.255649	-0.0701442	-0.307037	-0.112036	-0.175919	-0.142724	-0.159164	-0.223197	-0.204248	-0.259917
-0.0493367	-0.0500518	-0.188175	-0.0746486	-0.133718	-0.256143	-0.226337	-0.239679	-0.0881884	-0.325869	-0.13543	-0.162927	-0.133042	-0.213264	-0.178931	-0.136933	-0.259733
0.00153265	-0.0617224	-0.201121	-0.0611161	-0.151267	-0.232241	-0.224234	-0.192411	-0.0699873	-0.302934	-0.113045	-0.15882	-0.114579	-0.199022	-0.190257	-0.176603	-0.25308
-0.0328042	-0.0190985	-0.189413	-0.0669155	-0.191215	-0.207852	-0.238603	-0.221764	-0.0746663	-0.307596	-0.13925	-0.179533	-0.143669	-0.19258	-0.215533	-0.183134	-0.237977
0.0847888	0.000442519	-0.225131	-0.065333	-0.188391	-0.225998	-0.179971	-0.225805	-0.0717579	-0.311261	-0.131294	-0.182134	-0.119976	-0.168784	-0.17417	-0.186999	-0.24029
0.0355868	-0.00541863	-0.192783	-0.0501492	-0.159914	-0.253098	-0.213097	-0.23177	-0.0612145	-0.333912	-0.137192	-0.17379	-0.129892	-0.176132	-0.203909	-0.157011	-0.236643
0.00469785	-0.0700233	-0.20503	-0.058497	-0.171145	-0.273065	-0.222106	-0.247966	-0.0638794	-0.320461	-0.142575	-0.201315	-0.109821	-0.196027	-0.205675	-0.160712	-0.228916
0.000147869	-0.0351262	-0.204828	-0.0745666	-0.263549	-0.278405	-0.25195	-0.229984	-0.0567039	-0.319379	-0.146197	-0.149636	-0.0746713	-0.223924	-0.209432	-0.15674	-0.224255
-0.0326629	-0.0727013	-0.198314	-0.074389	-0.225754	-0.247578	-0.204202	-0.226832	-0.0611737	-0.290203	-0.156766	-0.165254	-0.117612	-0.225224	-0.208893	-0.176003	-0.219908
0.0216543	-0.0676065	-0.194518	-0.0716363	-0.162865	-0.244783	-0.210691	-0.216001	-0.0485606	-0.311199	-0.122229	-0.175402	-0.0960866	-0.21703	-0.221297	-0.145099	-0.2351
-0.0290737	-0.0410103	-0.202226	-0.0624256	-0.158574	-0.26183	-0.204398	-0.235522	-0.0549006	-0.310356	-0.12876	-0.167256	-0.097026	-0.215922	-0.235452	-0.144663	-0.214486
-0.0394172	-0.0499083	-0.194417	-0.0511628	-0.192507	-0.250721	-0.221149	-0.241645	-0.058723	-0.311758	-0.111521	-0.185277	-0.09931	-0.214497	-0.209861	-0.150645	-0.217527
-0.0070021	-0.0312025	-0.200377	-0.0515046	-0.176601	-0.245034	-0.218808	-0.221429	-0.0513562	-0.319742	-0.127988	-0.187355	-0.125287	-0.267095	-0.21146	-0.139926	-0.194356
-0.0293564	-0.00187668	-0.18707	-0.0760918	-0.179058	-0.253223	-0.215445	-0.232529	-0.0523747	-0.312059	-0.13351	-0.211089	-0.087976	-0.190701	-0.223158	-0.159462	-0.209696
-0.0512584	-0.0287398	-0.188377	-0.0623875	-0.185137	-0.255684	-0.174792	-0.209345	-0.0593344	-0.300436	-0.15166	-0.189905	-0.0894741	-0.18738	-0.21464	-0.15391	-0.210704
0.00814566	-0.036392	-0.175341	-0.0662874	-0.170348	-0.289334	-0.216828	-0.229268	-0.0459464	-0.300175	-0.141823	-0.156443	-0.0652652	-0.212224	-0.236792	-0.159569	-0.209166
0.0151826	-0.0606231	-0.187746	-0.0702313	-0.275641	-0.267795	-0.230117	-0.229314	-0.0579513	-0.299017	-0.145782	-0.172234	-0.165435	-0.210856	-0.210456	-0.225577	-0.203955
-0.00163256	-0.0661254	-0.161427	-0.0734727	-0.207408	-0.249622	-0.225862	-0.246604	-0.0636145	-0.305108	-0.14404	-0.209629	-0.123279	-0.167811	-0.214455	-0.19886	-0.199152
0.00786305	-0.0522992	-0.170891	-0.0739824	-0.172437	-0.273357	-0.227188	-0.270547	-0.051366	-0.290069	-0.160982	-0.200495	-0.128989	-0.239919	-0.198442	-0.170021	-0.195567
0.00455655	-0.0284269	-0.175996	-0.0793695	-0.224957	-0.211927	-0.209758	-0.221115	-0.0543873	-0.300632	-0.136756	-0.185373	-0.117926	-0.161177	-0.218397	-0.20354	-0.213765
-0.047415	-0.0345751	-0.18119	-0.0979855	-0.192316	-0.255726	-0.218874	-0.232328	-0.0499927	-0.286463	-0.121299	-0.145454	-0.0971058	-0.198242	-0.241553	-0.182319	-0.208153
-0.0424411	-0.0527527	-0.173662	-0.0606351	-0.19557	-0.268226	-0.235756	-0.221094	-0.0563998	-0.314769	-0.123515	-0.164858	-0.112652	-0.198627	-0.214044	-0.169693	-0.210486
0.0689345	-0.0196496	-0.192795	-0.0711266	-0.182185	-0.255379	-0.229487	-0.234809	-0.0567219	-0.306092	-0.098379	-0.159262	-0.134417	-0.237512	-0.226228	-0.189443	-0.203568
-0.0260498	-0.0470121	-0.189482	-0.0801674	-0.166614	-0.250164	-0.169726	-0.215641	-0.0583649	-0.293188	-0.113144	-0.186859	-0.124501	-0.210135	-0.23324	-0.185471	-0.1992
-0.0405193	-0.0196725	-0.155568	-0.068603	-0.183366	-0.267003	-0.221173	-0.239386	-0.059032	-0.301368	-0.101763	-0.14518	-0.142761	-0.191481	-0.231454	-0.21328	-0.210466
-0.0137564	-0.0277094	-0.168187	-0.0671751	-0.223553	-0.256741	-0.239405	-0.262126	-0.0638925	-0.311238	-0.13547	-0.186291	-0.124188	-0.237579	-0.253493	-0.211757	-0.189526
-0.0595388	-0.0639727	-0.183983	-0.0712297	-0.167651	-0.238345	-0.229185	-0.235702	-0.0634985	-0.304363	-0.15067	-0.20166	-0.11706	-0.196489	-0.238725	-0.22389	-0.216187
-0.0290737	-0.0218023	-0.189336	-0.0464955	-0.194342	-0.259494	-0.197532	-0.206126	-0.0562478	-0.296183	-0.125673	-0.188369	-0.146224	-0.227757	-0.24183	-0.250064	-0.214357
-0.00493907	-0.0193625	-0.177675	-0.0760689	-0.20937	-0.232408	-0.225388	-0.259493	-0.0559895	-0.309273	-0.107127	-0.202897	-0.111669	-0.229385	-0.243209	-0.253544	-0.198907
0.0172456	-0.0265871	-0.179015	-0.0808775	-0.159308	-0.247926	-0.207328	-0.220826	-0.0596205	-0.308253	-0.128681	-0.212275	-0.135283	-0.164171	-0.23709	-0.165664	-0.188669
0.00676088	-0.0774861	-0.203476	-0.090659	-0.209928	-0.273357	-0.22727	-0.230898	-0.0672358	-0.29243	-0.120626	-0.197798	-0.177634	-0.21573	-0.228812	-0.19826	-0.202227
0.0187717	-0.0281399	-0.197097	-0.0548261	-0.23705	-0.264583	-0.235649	-0.234809	-0.0541649	-0.311536	-0.119854	-0.185201	-0.120253	-0.210856	-0.253436	-0.20049	-0.193118
0.0365477	-0.0184785	-0.178485	-0.0629659	-0.241214	-0.29167	-0.208604	-0.222054	-0.0541093	-0.299763	-0.0911548	-0.131695	-0.158896	-0.22483	-0.249643	-0.203484	-0.206221
-0.00756731	-0.0343369	-0.179038	-0.0605835	-0.226807	-0.272342	-0.225257	-0.256676	-0.0640739	-0.304824	-0.146356	-0.194604	-0.140949	-0.257282	-0.23988	-0.227263	-0.219044
-0.0461715	-0.0203901	-0.172221	-0.0809367	-0.233987	-0.292045	-0.247678	-0.251629	-0.0573971	-0.3137	-0.113105	-0.196191	-0.130721	-0.233419	-0.223325	-0.239068	-0.214997
0.0558498	0.0353654	-0.18031	-0.0737973	-0.230237	-0.279211	-0.237883	-0.246134	-0.0644745	-0.305618	-0.0948758	-0.179437	-0.132765	-0.185887	-0.234764	-0.217467	-0.196594
-0.0431193	0.00259524	-0.170158	-0.0576017	-0.218464	-0.294937	-0.230658	-0.274168	-0.074959	-0.319827	-0.118528	-0.155278	-0.142012	-0.232639	-0.252097	-0.198911	-0.213629
-0.0141803	-0.0285705	-0.17354	-0.0665604	-0.229248	-0.278015	-0.238276	-0.227729	-0.0833018	-0.316597	-0.142753	-0.154016	-0.138629	-0.260335	-0.271867	-0.219482	-0.213819
-0.0249477	0.0218262	-0.182801	-0.0693647	-0.163424	-0.286247	-0.211321	-0.23501	-0.0955258	-0.322054	-0.136677	-0.169537	-0.138709	-0.225551	-0.271775	-0.230579	-0.211248
-0.0508628	-0.0112769	-0.18618	-0.0836016	-0.265096	-0.277932	-0.255878	-0.244793	-0.0687759	-0.317565	-0.164129	-0.1584	-0.147212	-0.216057	-0.258403	-0.193201	-0.215676
