# Supplementary material for: Sensory experience controls dendritic structure and behavior by distinct pathways involving degenerins
Source: eLife. 2025 Jan 10;14:e83973. doi: 10.7554/eLife.83973 (PMC11756856; doi:10.7554/eLife.83973)
Supplement: Figure 6—source data 1. [file elife-83973-fig6-data1.xlsx]

## Sheet: crowded-same
15.4.2024					18.04.2024															22.04.2024
worm1			worm3		worm1		worm2		worm3	worm4	worm5	worm6	worm7		worm8		worm10	worm11		worm2	worm3		worm4		worm5
video1-a	video2-a	video4-p	video9-a	video11-p	video1-p	video3-a	video4-a	video5-p	video7	video9	video12	vide14	video15	video16	video18-a	video-19p	video21-a	video22-a	video23-p	video5	video10-a	video13-p	video14-a	video17-p	video18-p
-1	-1	-1	-1	-1	-1	-1	-1	-1	-1	-1	-1	-1	-1	-1	-1	-1	-1	-1	-1	-1	-1	-1	-1	-1	-1
0.0816922	0.345843	0.0691729	0.164384	0.25	0.249135	0.169492	0.794521	0.0625	0.458221	0.33605	0	0.289888	0.546077	0.315441	0.313084	0.167513	0.0769231	-0.355072	0.2	0.831967	0.0394737	0.161905	-0.0736842	0	0.213675
0.0153173	0.260486	0.00802005	0.0993151	0.244898	0.228374	0.0847458	0.705479	0.0260417	0.455526	0.325392	-0.0654206	0.221348	0.50453	0.3125	0.200935	0.28934	0.0615385	-0.311594	0.169697	0.745902	0.0921053	0.0952381	0.0526316	0.114583	0.196581
-0.0371991	0.213392	0.00501253	0.0684932	0.204082	0.262976	0.0169492	0.614155	0.09375	0.37938	0.259561	0	0.240449	0.434696	0.305882	0.21028	0.00507614	0.0461538	-0.376812	0.212121	0.737705	0.0921053	0.0761905	-0.147368	0.239583	0.102564
-0.0911743	0.155997	-0.00902256	0.0445205	0.183673	0.148789	-0.110169	0.557078	0.046875	0.33221	0.198746	-0.0186916	0.269663	0.370829	0.280882	0.154206	0.106599	0.0307692	-0.264493	0.2	0.70082	0.157895	0.114286	0.0526316	-0.0520833	0.017094
-0.118891	0.117734	-0.0295739	0.0479452	0.193878	0.0692042	0.0423729	0.509132	0.0104167	0.261456	0.159248	-0.088785	0.253933	0.330387	0.255882	0.121495	0.203046	0.0461538	-0.358696	0.0545455	0.594262	0.276316	0.104762	-0.231579	-0.145833	-0.034188
-0.150255	0.0779985	-0.0340852	0	0.173469	0.128028	-0.0762712	0.413242	0.0104167	0.251348	0.180564	-0.116822	0.229213	0.327956	0.245588	0.121495	0.106599	0.0615385	-0.362319	0.121212	0.565574	0.0657895	-0.0380952	-0.0526316	0.03125	0.025641
-0.169949	0.0676968	-0.0441103	0.0342466	0.102041	0.0138408	0	0.347032	0.0677083	0.236523	0.151097	-0.0560748	0.18764	0.28663	0.236765	0.135514	0.0913706	-0.0307692	-0.315217	0.0727273	0.454918	-0.0394737	-0.0285714	-0.0947368	0.15625	0.017094
-0.182349	0.0573951	-0.0140351	0.0342466	0.0459184	0.0276817	-0.101695	0.378995	0.0885417	0.270216	0.0990596	-0.140187	0.153933	0.273812	0.219118	0.214953	0.0761421	0.0307692	-0.347826	0.133333	0.434426	0.171053	-0.0952381	-0.0842105	0.125	0.0940171
-0.203501	0.0257542	-0.0661654	-0.0445205	0.0459184	-0.0415225	-0.135593	0.278539	-0.03125	0.234501	0.149843	-0.126168	0.159551	0.23116	0.227941	0.182243	0.0659898	0.0307692	-0.311594	0.0909091	0.397541	0.184211	-0.0380952	-0.0105263	0.177083	0.025641
-0.198395	0.0139809	-0.0937343	-0.0616438	0.0612245	-0.017301	-0.127119	0.285388	-0.0416667	0.221698	0.125392	-0.0700935	0.131461	0.235359	0.219853	0.257009	0.0913706	0	-0.293478	0.0242424	0.385246	0.0394737	-0.12381	0.115789	-0.0104167	0.017094
-0.163384	0.0139809	-0.0802005	-0.0342466	0.0255102	0.0103806	-0.127119	0.287671	-0.03125	0.177898	0.11348	-0.116822	0.150562	0.208398	0.180147	0.200935	0.0152284	-0.0615385	-0.376812	-0.0181818	0.344262	0.0789474	0.0857143	-0.0526316	-0.03125	0.102564
-0.152443	0.0139809	-0.0736842	-0.0890411	0.0102041	0.0207612	-0.186441	0.30137	0.0520833	0.165094	0.0677116	-0.238318	0.0977528	0.183646	0.194853	0.102804	0.0609137	-0.0153846	-0.413043	0.0606061	0.286885	0.105263	-0.0666667	-0.189474	0	-0.025641
-0.159008	0.0206034	-0.085213	-0.0684932	0.0153061	0.179931	-0.0847458	0.399543	0	0.122642	0.0846395	-0.107477	0.0853933	0.161768	0.177941	0.0700935	0.111675	-0.0153846	-0.365942	0.10303	0.356557	-0.0131579	-0.0666667	-0.126316	0.03125	-0.0854701
-0.190372	0.00956586	-0.0897243	-0.130137	0.0408163	0.0484429	-0.144068	0.251142	0.03125	0.15566	0.117868	-0.149533	0.088764	0.147182	0.164706	0.0841122	-0.0152284	0.0307692	-0.336957	0.0121212	0.303279	0.0394737	0.00952381	-0.136842	0.03125	0
-0.128373	0.00588668	-0.0656642	-0.113014	0.0408163	0.017301	-0.059322	0.260274	0	0.124663	0.0382445	-0.0841122	0.0752809	0.162873	0.15	0.116822	0.0253807	0.0461538	-0.307971	0.0242424	0.266393	0.197368	-0.00952381	-0.105263	-0.0208333	-0.0598291
-0.122538	0.0206034	-0.079198	-0.167808	-0.0204082	0.0276817	-0.177966	0.356164	-0.0208333	0.12938	-0.0758621	-0.168224	0.0921348	0.180331	0.132353	0.0560748	0.0203046	0.0461538	-0.380435	-0.00606061	0.295082	0.0263158	-0.104762	-0.0526316	-0.0833333	0.00854701
-0.148796	0.0264901	-0.0691729	-0.15411	-0.00510204	-0.0103806	-0.20339	0.285388	-0.0885417	0.122642	-0.225705	-0.0327103	0.0325843	0.16663	0.105147	0.0560748	0.0558376	-0.0153846	-0.311594	-0.0666667	0.266393	-0.0263158	-0.0666667	0.0105263	-0.0104167	-0.017094
-0.118162	0.0309051	-0.0571429	-0.157534	-0.0204082	0.0899654	-0.262712	0.276256	-0.0416667	0.125337	-0.28464	-0.214953	0.0595506	0.15558	0.0823529	0.088785	0	0.0153846	-0.32971	-0.0181818	0.262295	0	-0.0380952	-0.0736842	-0.0729167	0.119658
-0.141503	0.0250184	-0.047619	-0.133562	0.0510204	-0.0276817	-0.254237	0.276256	0	0.136119	-0.29906	-0.140187	0.0426966	0.137901	0.0992647	-0.0046729	-0.0101523	-0.0307692	-0.307971	0.0424242	0.213115	0.171053	-0.0761905	-0.147368	-0.0208333	-0.0512821
-0.137126	0.0198676	-0.0401003	-0.178082	0.0153061	-0.0346021	-0.211864	0.226027	-0.078125	0.0977089	-0.305956	-0.205607	0.0865169	0.12221	0.0610294	0.126168	0.142132	0	-0.300725	0.0121212	0.213115	-0.0921053	0	-0.0947368	-0.145833	0.0512821
-0.107221	0.00809419	-0.0576441	-0.222603	-0.0204082	1.88927	-0.279661	0.152968	-0.0677083	0.0997305	-0.260815	-0.130841	-0.00786517	0.158232	-0.0441176	-0.0046729	0.0253807	0.0769231	-0.311594	0.0727273	0.147541	0.157895	-0.0285714	-0.126316	-0.0208333	0.042735
-0.116703	-0.000735835	-0.0486216	-0.208904	-0.0102041	0.0761246	-0.177966	0.226027	0	0.0707547	-0.332915	-0.196262	0.00337079	0.117127	-0.0227941	-0.0514019	0.00507614	-0.0461538	-0.300725	-0.0484848	0.143443	0.131579	-0.0571429	-0.0105263	-0.0416667	0.042735
-0.0926331	-0.00220751	-0.0155388	-0.277397	0.0357143	-0.0415225	-0.127119	0.13242	0	0.0498652	-0.289028	-0.182243	-0.0123596	0.12442	-0.000735294	0	0.071066	-0.0153846	-0.246377	0.0121212	0.114754	-0.0789474	-0.0285714	0.0842105	0.0208333	0.0512821
-0.0722101	0	-0.0235589	-0.229452	0.0102041	-0.0968858	-0.194915	0.182648	0.0625	0.0727763	-0.260188	-0.0140187	0.00786517	0.158011	-0.0257353	-0.0140187	0.0862944	0	-0.311594	0.0666667	0.106557	0.0394737	-0.114286	-0.0421053	0.145833	0.0854701
-0.0685631	-0.00588668	0.0155388	-0.188356	-0.0204082	-0.124567	-0.20339	0.125571	0.0104167	0.0640162	-0.189342	-0.130841	0.0123596	0.123315	-0.075	0	0.0253807	0.0307692	-0.278986	-0.030303	0.057377	-0.0263158	-0.133333	-0.0315789	0.03125	0.0598291
-0.0962801	-0.0301692	0	-0.160959	-0.00510204	-0.0968858	-0.169492	0.136986	-0.0885417	0.0902965	-0.104075	-0.14486	-0.0426966	0.144972	-0.00588235	0.0420561	0.0152284	0.0153846	-0.192029	0.0606061	0.0819672	-0.197368	-0.0190476	-0.0421053	0.0729167	0.17094
-0.0853392	-0.0360559	-0.0320802	-0.171233	-0.0102041	-0.0588235	-0.220339	0.0890411	-0.0833333	0.0121294	-0.10094	-0.102804	-0.0213483	0.151823	-0.0360294	0.088785	0	0.0307692	-0.221014	0	0.045082	0.0131579	-0.047619	-0.0105263	-0.09375	-0.0854701
-0.116703	-0.0441501	0.00300752	-0.171233	-0.0357143	-0.0519031	-0.144068	0.107306	-0.0416667	-0.0141509	-0.120376	-0.14486	-0.0438202	0.134586	0.00294118	-0.046729	0.0304569	-0.0769231	-0.289855	0.030303	0.0614754	-0.105263	-0.0857143	-0.0736842	-0.0520833	-0.0598291
-0.109409	-0.0434143	0.0205514	-0.15411	-0.0153061	-0.0968858	-0.169492	0.150685	-0.0208333	-0.041779	-0.0526646	-0.0981308	-0.0224719	0.129282	-0.00367647	0.102804	-0.0152284	0.0461538	-0.307971	-0.030303	0.0409836	0.144737	-0.0666667	-0.0631579	0.0208333	0.0683761
-0.0984683	-0.0470935	0.0140351	-0.174658	-0.0816327	-0.0692042	-0.127119	0.0936073	-0.0729167	-0.0195418	-0.102821	-0.0280374	-0.0674157	0.119337	0.0426471	-0.0280374	0.0456853	-0.0461538	-0.304348	0.0727273	0.0286885	-0.0394737	-0.104762	-0.0526316	-0.0520833	-0.0598291
-0.106492	-0.0456218	-0.0130326	-0.150685	-0.0816327	-0.0726644	-0.0338983	0.0936073	-0.177083	-0.0316712	-0.144201	-0.0607477	-0.0359551	0.16221	0.100735	0.107477	0.0152284	0	-0.311594	0.0666667	0.0204918	0.0657895	-0.0285714	0.0526316	-0.0625	-0.017094
-0.0846098	-0.0544518	-0.00601504	-0.126712	-0.0816327	0	-0.0932203	0.0936073	-0.0833333	0.00202156	-0.140439	-0.107477	-0.0595506	0.187845	0.0742647	0.0186916	0.0152284	-0.0307692	-0.224638	-0.0121212	0.0286885	0.0263158	-0.0571429	0.0631579	-0.0729167	0.0512821
-0.0787746	-0.062546	0.0180451	-0.0616438	-0.0714286	0	-0.00847458	0.152968	-0.0625	0	-0.210031	-0.0654206	-0.0505618	0.0956906	0.0477941	0.0654206	-0.0203046	-0.0153846	-0.246377	0.0545455	0.00409836	0.0263158	-0.0761905	0.168421	-0.03125	0.230769
-0.0707513	-0.0573951	0.0325815	-0.0171233	-0.0510204	-0.0138408	-0.0762712	0.146119	-0.0729167	-0.00808625	-0.171787	-0.088785	-0.0179775	-0.080442	-0.0367647	0.0186916	0.0406091	0	-0.242754	0.00606061	0.00819672	-0.0263158	0.0380952	0.2	0.0104167	0.196581
-0.0576222	-0.0463576	0.0411028	0.0205479	-0.0459184	-0.0899654	-0.127119	0.0707763	-0.09375	-0.0235849	-0.216301	0.0140187	0	-0.161768	-0.0382353	0.0140187	0.00507614	0	-0.221014	-0.00606061	0.00819672	0.0263158	-0.0571429	0.0947368	0	-0.034188
-0.0576222	-0.0441501	0.0897243	0.0513699	-0.0918367	-0.0484429	0.0169492	0.0365297	-0.0104167	-0.0330189	-0.154859	-0.0046729	-0.0213483	-0.229171	-0.0875	-0.0373832	0.0659898	-0.0307692	-0.108696	0.0363636	0.0122951	0.0657895	0.00952381	0.0631579	-0.135417	-0.102564
-0.0503282	-0.0456218	0.0756892	0.0821918	-0.0765306	0.00692042	0.00847458	-0.0159817	-0.151042	-0.0161725	-0.0589342	-0.107477	0.0595506	-0.285746	-0.149265	0.0233645	0.0659898	0	-0.105072	0.0484848	-0.0163934	0.0657895	-0.0285714	0.157895	0.0104167	0.145299
-0.0350109	-0.0515085	0.112782	0.0958904	-0.0765306	-0.0311419	-0.0932203	-0.00913242	-0.0520833	-0.0296496	0.163636	-0.0280374	0.0280899	-0.304309	-0.110294	-0.0186916	0.0304569	-0.0307692	-0.105072	-0.030303	-0.0204918	0	0.0952381	0.189474	0.135417	0
-0.0598104	-0.0478293	0.0897243	0.0890411	-0.102041	-0.00346021	-0.0423729	-0.0342466	-0.015625	-0.0512129	0.240752	-0.088785	0	-0.255249	-0.111765	0.0654206	-0.0152284	-0.0461538	-0.0362319	-0.0363636	-0.0409836	-0.105263	0.0285714	0.147368	0.125	-0.017094
-0.0525164	-0.0331126	0.0802005	0.106164	-0.0561224	0.0449827	0	0	-0.0625	-0.0633423	0.410031	-0.126168	0.0292135	-0.245967	-0.0375	0.0186916	-0.0152284	0.0307692	-0.108696	-0.030303	-0.0163934	-0.0263158	0	0.168421	0.15625	-0.034188
-0.0364697	-0.0412068	0.101754	0.130137	0.0459184	-0.0311419	-0.127119	0.0456621	0.0625	-0.0161725	0.453292	-0.0607477	0.00561798	-0.263646	0	-0.0654206	-0.0456853	-0.0461538	-0.0652174	0.0727273	-0.0655738	-0.157895	0.142857	-0.0421053	0.0208333	0.0512821
-0.0525164	-0.0213392	0.0967419	0.167808	-0.0153061	-0.0346021	0.0338983	0.10274	0.0104167	-0.0592992	0.495298	-0.116822	-0.0224719	-0.257238	0.000735294	0	-0.0659898	0.0461538	-0.108696	-0.0363636	-0.0368852	-0.0789474	0.152381	0.126316	-0.125	-0.0598291
-0.0612691	-0.00735835	0.0922306	0.136986	-0.0357143	-0.00346021	-0.110169	0.06621	0.0416667	-0.0336927	0.588715	-0.126168	-0.00561798	-0.265856	-0.0272059	0	-0.0152284	0	-0.112319	-0.0181818	-0.0696721	0.105263	0.12381	0.0210526	0.0520833	0.0598291
-0.0452225	-0.00515085	0.0686717	0.116438	-0.0153061	-0.0380623	-0.0254237	0.0570776	0.0364583	-0.0438005	0.532915	0.00934579	0.0685393	-0.273591	-0.0720588	0.11215	-0.0304569	0.0307692	-0.0615942	0.030303	-0.045082	0.0394737	-0.00952381	0.210526	0	-0.0512821
-0.0291758	0.0117734	0.0646617	0.195205	-0.0459184	-0.0415225	0.00847458	0.0936073	0.0104167	-0.0195418	0.56489	-0.11215	0.0325843	-0.266298	-0.0169118	-0.0514019	-0.0101523	-0.0461538	-0.0253623	0.00606061	-0.057377	-0.0657895	-0.0285714	-0.0421053	0.0208333	-0.042735
-0.0102115	-0.0139809	0.0461153	0.171233	-0.0561224	-0.0795848	0.0338983	0.141553	0.00520833	-0.00808625	0.541693	-0.0747664	0.0247191	-0.257238	-0.0213235	-0.0700935	0.0456853	-0.0769231	-0.0362319	0.115152	-0.0901639	-0.0263158	-0.0571429	0.126316	0.135417	-0.017094
0	-0.00220751	0.0897243	0.0993151	-0.0969388	-0.083045	-0.0423729	0.00913242	0.0677083	-0.041779	0.465204	0	0.0561798	-0.245083	0.0227941	-0.0747664	-0.0558376	0	-0.0978261	-0.030303	-0.0614754	0.0263158	0	-0.0526316	-0.03125	-0.0769231
0.0423049	0.00441501	0.0536341	0.0993151	-0.0816327	-0.100346	0.0169492	0.0639269	-0.0885417	0.00336927	0.415047	0.0560748	0.0505618	-0.23337	0.0816176	-0.0186916	0.0812183	-0.0153846	0	0.0484848	-0.0286885	-0.0263158	-0.0285714	-0.0105263	0	-0.034188
0.059081	0.0154525	0.0621554	0.160959	-0.0816327	-0.0380623	0.127119	0.0388128	0.015625	0.0343666	0.419436	0.0560748	0.0011236	-0.221436	0.0639706	-0.0233645	-0.035533	0.0307692	-0.0507246	-0.0666667	-0.0204918	0.25	0	-0.0736842	0.0104167	-0.111111
0.0656455	0.0183959	0.0300752	0.106164	-0.0204082	-0.0311419	0.0169492	0.0890411	0.0104167	0.0377358	0	0.0841122	0.00674157	-0.216354	0.0507353	-0.121495	-0.121827	-0.0153846	-0.0362319	0.0848485	-0.0163934	0	-0.0666667	-0.0315789	0.0208333	-0.0598291
0.075857	0.01766	0.0270677	0.116438	-0.0102041	-0.0311419	-0.0338983	0.0136986	0.015625	0.0330189	-0.25768	0.0747664	0.0134831	-0.213923	0.0117647	-0.0140187	0.071066	0	0.0615942	-0.0424242	-0.045082	-0.0657895	0	-0.0631579	-0.0833333	0.017094
0.0904449	0.0183959	0.00300752	0.0547945	-0.0102041	-0.0761246	0.0423729	0.00456621	-0.0416667	0.0343666	-0.328527	0.107477	0.0359551	-0.187403	0.0154412	0.107477	0.0152284	-0.0461538	0.0253623	-0.0121212	-0.0245902	0.0263158	0	0.126316	-0.09375	-0.119658
0.0765864	0.0242826	0	0.0547945	0.0204082	0.0657439	-0.0423729	0	-0.0885417	0.0795148	-0.337304	0.0373832	-0.011236	-0.190718	-0.0110294	-0.0140187	0.101523	-0.0307692	0.0326087	-0.0363636	-0.00819672	-0.0921053	0.0952381	0.147368	-0.0208333	-0.188034
0.083151	0.0139809	-0.00952381	0.0856164	0	-0.0692042	-0.0338983	-0.0114155	-0.0989583	0.0822102	-0.351097	0.0981308	0.0505618	-0.185193	0.0169118	0.0327103	0.0152284	-0.0153846	0.224638	0.0121212	-0.00409836	0.0131579	0.171429	-0.0105263	0.0520833	-0.162393
0.123268	0.00367918	0.0766917	0.0308219	0.0153061	-0.0311419	-0.0677966	-0.0296804	0.00520833	0.0761456	-0.416301	0.11215	0.0235955	-0.189171	0.00955882	-0.0140187	0.0152284	-0.0307692	0.188406	-0.0606061	0.0614754	0.0394737	0.152381	0.0210526	0	0
0.12108	-0.00956586	0.0601504	0.0308219	0.00510204	-0.0311419	-0.101695	-0.0273973	-0.0677083	0.0761456	-0.402508	0.107477	0.0404494	-0.205967	-0.0125	-0.0373832	0.0152284	0.0461538	0.0471014	0	0	-0.0263158	0.0952381	0.105263	-0.0104167	-0.102564
0.12035	-0.0228109	0.0210526	0.0376712	-0.00510204	-0.0968858	0	-0.0205479	-0.0416667	0.0539084	-0.405016	0.0747664	0.0123596	-0.164199	0.00588235	-0.0841122	0.0507614	0.0307692	0.206522	-0.0787879	0.0368852	-0.0131579	0.0666667	-0.0736842	-0.125	0.025641
0.150255	-0.0345843	0.0155388	0.0513699	-0.00510204	-0.0657439	-0.059322	0.0365297	0.0208333	0.0721024	-0.398119	0.130841	-0.00786517	-0.165525	-0.00294118	-0.0186916	0.0761421	-0.0153846	0.181159	-0.0909091	-0.0327869	0.0131579	0.0952381	0	-0.0729167	-0.00854701
0.159008	-0.0235467	0.0360902	0.0342466	0.0408163	-0.0795848	-0.0508475	-0.0753425	-0.114583	0.0431267	-0.386207	0.0186916	0.0303371	-0.18011	0.0375	-0.0327103	0.0964467	0.0153846	0.123188	-0.0545455	-0.0245902	-0.0921053	0.142857	-0.0736842	0.0729167	-0.0769231
0.179431	-0.00367918	0.0646617	0.0376712	-0.0663265	-0.0622837	0.0423729	-0.0707763	0.0364583	0.0491914	-0.339812	0	0.0348315	-0.184751	0.0191176	-0.0140187	0.0304569	0.0153846	0.134058	-0.0121212	-0.0409836	-0.0657895	0.0380952	-0.0421053	-0.0729167	-0.102564
0.184537	-0.00441501	0.0205514	0.010274	0.0306122	-0.0242215	-0.00847458	-0.0707763	-0.09375	0.00471698	-0.335423	0.0280374	0.0292135	-0.184088	0.0220588	0.046729	-0.0558376	0	0.224638	-0.0121212	-0.0163934	0	0.114286	0.189474	0.114583	-0.162393
0.178702	-0.00441501	-0.00551378	0.0308219	0.0357143	-0.0519031	-0.118644	-0.0730594	-0.03125	0.0175202	-0.338558	0.00934579	0.0011236	-0.203978	0.00661765	-0.0514019	-0.071066	0.0153846	0.235507	0	-0.0122951	-0.0526316	0.0285714	0	-0.0625	-0.111111
0.21736	-0.0125092	0.0656642	0.0273973	0.0663265	-0.0346021	0.0338983	-0.105023	-0.119792	0.0545822	-0.405016	0.0607477	0.0640449	-0.228729	-0.0154412	-0.0420561	0	0.0461538	0.202899	0.00606061	0.00409836	-0.0131579	0.0952381	0.0105263	0.0625	0.017094
0.209336	-0.0169242	0.0165414	0	-0.0102041	-0.0692042	-0.0169492	-0.0890411	-0.0104167	0.0397574	-0.438871	0.0981308	0.041573	-0.257238	-0.00661765	-0.0280374	0.0152284	-0.0769231	0.333333	-0.0121212	-0.045082	0.0263158	-0.0285714	0.294737	0	-0.119658
0.223924	-0.0323767	0.0350877	-0.010274	-0.00510204	-0.0242215	0.110169	-0.0753425	-0.0520833	0.0390836	-0.412539	0.0700935	-0.0146067	-0.267845	-0.0117647	-0.0981308	-0.0456853	0.0153846	0.318841	0.0363636	-0.0860656	0.0131579	0.0285714	-0.0210526	-0.104167	-0.0512821
0.228301	-0.0353201	-0.0120301	0.00342466	0.00510204	-0.0484429	0.0338983	-0.105023	-0.0416667	-0.000673854	-0.383699	0.0373832	0.0269663	-0.275138	0.0183824	-0.0233645	0.106599	-0.0615385	0.257246	0.0181818	-0.0655738	-0.0263158	0.00952381	0.221053	0.0208333	0.0769231
0.243618	-0.013245	-0.0125313	-0.0136986	0.00510204	-0.0242215	0.0847458	-0.173516	-0.0208333	0.0168464	-0.507837	0.0280374	0.0303371	-0.266961	0.0110294	-0.0420561	-0.0558376	-0.0153846	0.213768	0.0121212	-0.0614754	0.0657895	-0.0666667	0.0526316	0.0208333	0.0598291
0.256018	0.0198676	-0.0105263	0.00684932	0.0459184	-0.0795848	0.0932203	-0.121005	-0.0520833	-0.0215633	-0.478997	-0.0046729	0.00898876	-0.26011	0.0161765	0.0046729	0.0101523	-0.0153846	0.23913	0.00606061	-0.0614754	0.0921053	0.0952381	0.178947	-0.145833	-0.145299
0.226842	0.0566593	0.035589	-0.0376712	0.0255102	-0.0346021	0.0932203	-0.175799	-0.015625	0.0330189	-0.596865	0.0186916	-0.0101124	-0.265193	0.0257353	-0.0186916	0.0101523	-0.0153846	0.173913	-0.0545455	-0.0983607	-0.0921053	-0.00952381	0.0736842	-0.0416667	-0.119658
0.237053	0.0654893	0.00701754	-0.0136986	0	-0.0449827	-0.0338983	-0.178082	-0.0885417	-0.0229111	-0.635737	0.0373832	-0.0292135	-0.19779	0.0176471	0.0560748	-0.0812183	-0.0307692	0.177536	-0.0242424	-0.106557	0.0526316	0.104762	0.105263	0	-0.00854701
0.2407	0.0794702	-0.0200501	-0.0136986	0.0816327	-0.0138408	0.135593	-0.143836	-0.03125	-0.0121294	-0.690282	0.0560748	-0.0348315	-0.179669	0.0375	0.0373832	-0.13198	0.0153846	0.286232	-0.0363636	-0.114754	-0.0263158	0.152381	0.126316	-0.0729167	-0.017094
0.227571	0.0573951	0.0210526	-0.0136986	0.122449	0.0242215	0.0677966	-0.191781	0.00520833	-0.0363881	-0.69906	0.0233645	-0.0640449	-0.0954696	-0.0213235	-0.00934579	-0.121827	0.0307692	0.282609	0.00606061	-0.0368852	-0.0263158	0.0857143	-0.0736842	-0.125	0
0.257476	0.0441501	-0.0235589	-0.0342466	0.0612245	0.0934256	0.0677966	-0.178082	-0.0260417	-0.0357143	-0.662069	-0.0280374	-0.0820225	-0.0649724	0.000735294	0.0233645	-0.0862944	0	0.184783	0.0666667	-0.106557	0.0263158	0.0190476	-0.0210526	0.104167	-0.034188
0.221736	0.0485651	-0.00902256	-0.0479452	0.0918367	0.186851	0.127119	-0.214612	0.0677083	-0.027628	-0.662696	0.0186916	-0.0460674	-0.041989	-0.0220588	-0.0420561	-0.0913706	-0.0307692	0.199275	-0.0121212	-0.0819672	-0.0263158	-0.104762	0.126316	0.0520833	-0.0769231
0.16922	0.0603385	-0.0295739	-0.0650685	0.107143	0.179931	0.127119	-0.207763	-0.0104167	-0.0242588	-0.586834	0.0186916	-0.0247191	-0.0340331	-0.0205882	0.0794393	-0.0558376	-0.0153846	0.365942	0.0545455	-0.0860656	0.144737	0.0190476	0.189474	-0.0208333	0.042735
0.148067	0.0573951	-0.00551378	-0.0308219	0.112245	0.32872	0.0508475	-0.210046	0.0989583	0.00471698	-0.495925	-0.0373832	-0.0202247	-0.00685083	-0.0154412	0.0654206	-0.111675	0.0307692	0.398551	0.00606061	-0.045082	-0.105263	-0.0666667	0.105263	-0.03125	0.0598291
0.15609	0.0470935	-0.0100251	-0.0376712	0.147959	0.32526	0.144068	-0.223744	0	-0.0309973	-0.0952978	-0.00934579	-0.0674157	0.0234254	-0.0323529	-0.0607477	0.0659898	-0.0615385	0.423913	-0.0181818	-0.0737705	-0.0921053	-0.0285714	0.126316	-0.114583	-0.0769231
0.100656	0.0573951	0.00802005	-0.0513699	0.0918367	0.33218	0.101695	-0.166667	-0.0364583	-0.0397574	0.122257	0.102804	-0.00449438	-0.000662983	-0.0470588	-0.0280374	-0.0304569	-0.0307692	0.347826	-0.030303	-0.00819672	-0.0394737	-0.0380952	0.136842	-0.0729167	0.0598291
0.0933625	0.0441501	0.0195489	-0.0342466	0.158163	0.307958	0.059322	-0.203196	0.145833	-0.0181941	0.260815	0.0841122	-0.0494382	0.0276243	-0.0102941	0.0280374	-0.0456853	0.0153846	0.318841	0.109091	0	0.0921053	-0.0380952	0.105263	0.03125	0.0598291
0.0415755	0.0441501	0.00902256	-0.0650685	0.0918367	0.249135	0.0169492	-0.244292	0.0677083	-0.0451482	0.28652	0.130841	-0.0426966	-0.00729282	-0.0455882	-0.0327103	-0.0152284	-0.0615385	0.40942	0.139394	0.0163934	0.0394737	-0.0761905	0.0315789	0.0729167	0.0512821
0.0226112	0.0375276	0.0360902	-0.0684932	0.122449	0.349481	0.0932203	-0.232877	0.125	-0.0283019	0.191223	0.135514	-0.0932584	-0.00265193	-0.0235294	0.0700935	-0.0862944	-0.0461538	0.326087	-0.0242424	0.0122951	-0.0394737	-0.0666667	0.0842105	0	0.034188
-0.0123997	0.0375276	0.0315789	-0.0273973	0.142857	0.429066	-0.0677966	-0.214612	0.0572917	-0.0256065	0.189969	0.116822	-0.0595506	0.0234254	-0.00735294	-0.0607477	-0.126904	-0.0153846	0.503623	0.0242424	0.0655738	-0.0657895	-0.0952381	-0.0526316	-0.0208333	-0.0512821
-0.0196937	0.0338484	-0.0240602	-0.0616438	0.132653	0.425606	0.118644	-0.219178	0.135417	0.00673854	0.192476	0.163551	-0.0629213	0.0512707	-0.0330882	-0.046729	-0.187817	-0.0461538	0.326087	-0.00606061	0.0286885	-0.105263	0.0380952	0.389474	0.125	0.042735
-0.0605398	0.0316409	-0.0225564	-0.0479452	0.132653	0.477509	0.0508475	-0.173516	0.177083	-0.0074124	0.253292	0.0934579	-0.105618	0.0746961	-0.0441176	-0.0654206	-0.19797	-0.0307692	0.431159	0.00606061	0.0122951	-0.0131579	-0.00952381	0.0210526	0.0625	-0.017094
-0.0401167	0.0426784	-0.0265664	-0.0239726	0.0765306	0.567474	0.0338983	-0.155251	0.229167	-0.00404313	0.224451	0.182243	-0.0966292	0.0576796	-0.00955882	0.0373832	-0.121827	0.0461538	0.51087	0.163636	0.0327869	0.0394737	-0.047619	-0.0842105	-0.03125	-0.0940171
0	0.0375276	-0.0120301	-0.0308219	0.137755	0.619377	0.101695	-0.141553	0.21875	-0.00404313	0.187461	0.11215	-0.0988764	0.0570166	-0.00220588	-0.0560748	-0.233503	0	0.626812	-0.0666667	0.0286885	-0.0263158	0.142857	0.0736842	0.0416667	0.0940171
-0.0182349	0.0360559	0.0205514	0.00684932	0.0714286	0.792388	0.0254237	-0.0342466	0.1875	-0.00606469	0.238871	0.158879	-0.141573	0.105193	0	-0.0373832	-0.121827	0.0153846	0.427536	0	0.00819672	-0.144737	0.114286	-0.0526316	0.09375	0.239316
0.0211524	-0.00147167	0.00551378	0.0547945	0.0408163	0.754325	0.0508475	-0.136986	0.239583	-0.0208895	0.284013	0.168224	-0.120225	0.0751381	-0.0375	0.0140187	-0.172589	-0.0153846	0.344203	0	-0.0122951	-0.157895	-0.0285714	0.0421053	-0.0416667	0.0683761
0.0371991	-0.0286976	-0.00451128	0.0993151	0.0663265	0.782007	0	-0.13242	0.255208	-0.0296496	0.342947	0.126168	-0.0910112	0.0592265	-0.000735294	-0.0700935	-0.19797	0.0153846	0.40942	-0.0242424	-0.0245902	-0.105263	0.114286	0	0.0625	-0.0598291
0.0335522	-0.0441501	-0.0190476	0.0856164	-0.00510204	0.858131	-0.0254237	-0.134703	0.239583	-0.0188679	0.28652	0.130841	-0.105618	0.0689503	-0.0161765	0.0373832	-0.213198	0.0769231	0.413043	0	0.0163934	-0.105263	0.352381	0.0210526	0.104167	-0.042735
0.055434	-0.0559235	-0.00100251	0.0924658	0	0.871972	0.0677966	-0.125571	0.369792	-0.0357143	0.346708	0.135514	-0.117978	0.080663	-0.0154412	0	-0.162437	0.0461538	0.576087	-0.115152	-0.0409836	0.0263158	0.628571	-0.0210526	0.0104167	-0.00854701
0.0722101	-0.066961	-0.0340852	0.0958904	-0.0561224	0.785467	0	-0.166667	0.135417	-0.0283019	0.341066	0.046729	-0.131461	0.118011	0.0147059	-0.0046729	-0.263959	0	0.362319	-0.0424242	-0.00819672	-0.0394737	1.11429	0.473684	0.0625	-0.017094
0.0897155	-0.0684327	-0.0285714	0.0821918	-0.0153061	0.809689	0.0508475	-0.107306	0.302083	-0.0377358	0.260188	0.0233645	-0.2	0.0607735	-0.00220588	-0.0233645	-0.228426	-0.0769231	0.471014	0.0727273	-0.0327869	-0.131579	1.4	0.2	0.0416667	0.205128
0.0838804	-0.0912436	0.00451128	0.0513699	-0.0969388	0.865052	0.271186	-0.164384	0.307292	-0.0444744	0.254545	0.285047	-0.165169	0.0528177	0.0316176	-0.0841122	-0.238579	0.0461538	0.398551	-0.0242424	-0.0286885	-0.0263158	1.66667	0.0421053	0.135417	0.119658
0.0984683	-0.111111	0.0245614	0.0616438	-0.0153061	0.806228	0.161017	-0.118721	0.322917	-0.0424528	0.26395	-0.0420561	-0.192135	0.0559116	0.00588235	-0.0233645	-0.238579	-0.0153846	0.344203	-0.0969697	-0.0327869	0.0789474	2.14286	0.0631579	0.0520833	0.00854701
0.118891	-0.127299	-0.0406015	0.0205479	-0.0459184	0.809689	0.144068	-0.105023	0.354167	-0.037062	0.236364	0.140187	-0.189888	0	-0.00147059	0	-0.324873	-0.0307692	0.431159	-0.0606061	-0.0491803	0.0263158	2.55238	-0.115789	0.177083	0.239316
0.152443	-0.134658	-0.00902256	0.0136986	-0.0663265	0.733564	0.0762712	-0.173516	0.34375	-0.0633423	0.230721	0.0560748	-0.248315	0.000220994	-0.0117647	-0.0186916	-0.319797	0.0461538	0.445652	-0.0545455	-0.0491803	-0.0131579	3.08571	-0.0736842	0.125	-0.017094
0.19329	-0.152318	-0.0130326	-0.0273973	-0.0408163	0.709343	0.169492	-0.164384	0.244792	-0.0485175	0.197492	0	-0.238202	-0.078674	-0.00661765	0.00934579	-0.304569	0.0769231	0.5	-0.0121212	-0.0204918	-0.0263158	3.18095	-0.0421053	0.03125	0.247863
0.194019	-0.15894	-0.0160401	-0.0342466	-0.0153061	0.709343	0.0169492	-0.175799	0.458333	-0.0795148	0.174922	0.0233645	-0.258427	-0.0751381	-0.0397059	-0.0140187	-0.284264	0.0307692	0.666667	-0.0727273	-0.0122951	0.0131579	3.31429	-0.0526316	0.197917	0
0.200584	-0.136865	0.0235589	-0.0650685	-0.0306122	0.709343	0.059322	-0.118721	0.338542	-0.0552561	0.20815	0.0794393	-0.286517	-0.130829	0.00661765	0.00934579	-0.203046	0.107692	0.59058	-0.030303	0.0122951	0.0657895	3.6381	-0.115789	0.104167	0.0683761
0.212983	-0.135394	-0.0160401	-0.0513699	-0.0255102	0.584775	0.0677966	-0.175799	0.307292	-0.0673854	0.240125	0.0794393	-0.314607	-0.230055	-0.0191176	0.0233645	-0.284264	0.0153846	0.496377	-0.0666667	0.057377	0.131579	3.6381	0.0105263	0.1875	0.17094
0.245077	-0.125092	0.0085213	-0.113014	-0.00510204	0.567474	0.0423729	-0.109589	0.307292	-0.0586253	0.154232	0.0841122	-0.337079	-0.241105	-0.00367647	0.0046729	-0.279188	0.0615385	0.550725	0.0121212	0.102459	0.0789474	4.07619	-0.0736842	0.0520833	0.179487
0.10795	-0.108904	-0.374436	-0.263699	0.0459184	0.456747	-0.152542	-0.431507	0.385417	-0.208895	0.10721	0.0934579	-0.470787	-0.417017	-0.317647	-0.0654206	-0.22335	0.0615385	0.543478	0.0666667	0.0901639	-0.0131579	4.12381	0.105263	0.0104167	-0.017094
0.151714	-0.101545	-0.110777	-0.0445205	0.0663265	0.356401	0.0254237	-0.187215	0.119792	-0.0983827	-0.228213	0.0560748	-0.504494	-0.111823	-0.0139706	0.0186916	-0.269036	0.507692	0.630435	-0.139394	0.471311	0.223684	3.9619	0.263158	0.28125	0.264957
0.110868	-0.104489	0.0902256	0.280822	0.214286	0.411765	0.194915	-0.100457	0.515625	0.100404	-0.17931	0.476636	-0.529213	0.0134807	0.330882	0.266355	-0.13198	0.569231	0.818841	0.321212	0.790984	0.473684	4.05714	0.863158	0.53125	0.547009
0.0999271	-0.0927152	0.220551	0.541096	0.280612	0.553633	0.194915	-0.10274	1.16667	0.169137	-0.00877743	0.901869	-0.430337	0.201989	0.583088	0.598131	0.177665	0.876923	1.26449	1.12727	1.17623	0.697368	4.3619	1.13684	0.979167	0.717949
0.133479	-0.0662252	0.364912	0.921233	0.489796	0.816609	0.415254	0.0776256	1.57812	0.325472	0.060815	1.32243	-0.251685	0.415249	0.816176	1.01869	0.659898	1.2	1.64493	2.38182	1.38525	0.934211	3.55238	1.91579	1.4375	1.05128
0.207148	-0.0522443	0.403008	1.22603	0.709184	1.08651	0.610169	0.0479452	2.01042	0.487197	0.32163	1.7757	0.105618	0.622099	1.17941	1.58879	1.19289	1.63077	1.93116	3.53939	1.65164	0.855263	3.74286	2.06316	1.59375	1.24786
0.256747	-0.058131	0.371429	1.5274	0.943878	1.17647	0.728814	0.109589	2.21354	0.683288	0.645141	2.30841	0.430337	0.839558	1.65294	2.33178	1.72589	1.90769	2.33333	4.65455	1.80328	1.36842	1.93333	2.23158	2	1.40171
0.21663	-0.0956586	0.356391	1.7774	1.2602	1.43253	0.762712	0.184932	2.70833	0.860512	0.99373	2.4486	0.741573	0.980331	1.95882	3.32243	2.35533	2	2.78261	5.39394	2.0041	1.85526	3.39048	2.74737	2.05208	1.35897
0.202042	-0.260486	0.374436	1.89726	1.45408	1.45675	1.02542	0.310502	2.97396	1.1159	1.33793	2.56542	0.948315	1.14829	2.23676	3.96729	2.9797	2.21538	3.12319	5.64848	2.08607	1.59211	3.00952	3.03158	2.41667	1.44444
0.483589	-0.225901	0.371429	1.96575	1.67857	1.43945	1.18644	0.376712	3.375	1.21765	1.56552	2.63551	1.13708	1.32773	2.52059	5.18692	3.74112	2.26154	3.46014	6.70909	2.19672	1.88158	3.08571	2.95789	2.47917	1.65812
0.728665	-0.160412	0.325313	2.07192	2.03061	1.44983	1.47458	0.410959	3.54167	1.34097	1.68966	2.70093	1.24382	1.65017	2.92721	5.50935	3.91878	2.49231	3.65217	7.09091	2.18852	2.15789	2.92381	2.77895	2.78125	1.8547
0.809628	-0.0824135	0.24812	2.07877	1.38265	1.44637	1.61017	0.47032	4.15625	1.37803	2.02571	3.00467	1.31348	1.86475	3.20515	6.41121	4.58376	2.50769	3.88406	6.96364	2.18033	2.03947	2.86667	2.78947	2.75	1.98291
0.931437	-0.0110375	0.350376	1.9863	1.91327	1.44983	1.87288	0.497717	3.82292	1.53167	2.43197	2.85047	1.38876	2.00685	3.66691	6.66822	4.8731	2.58462	3.88406	7.02424	2.22951	2.25	2.62857	2.61053	2.90625	1.84615
0.96353	0.0294334	0.501253	2.0274	1.9898	1.61592	2.18644	0.563927	4.27083	1.68666	2.45392	2.93458	1.48876	2.14829	4.08235	7.08411	5.24365	2.50769	4.12319	6.70303	2.15574	2.10526	2.71429	2.55789	2.91667	1.77778
1.02407	0.122884	0.693233	2.00342	2.07653	1.70934	2.24576	0.56621	4.25	1.71563	2.61881	3.07477	1.60787	2.29724	4.20221	7.3972	5.53807	2.44615	4.03986	7.17576	2.18443	1.82895	2.38095	2.94737	3.34375	1.8547
1.08534	0.197204	0.92782	2.15753	2.19898	1.73702	2.66102	0.657534	4.28646	1.74865	2.7511	3.02804	1.7573	2.33635	4.63382	7.3271	5.48223	2.47692	3.95652	7.48485	2.17623	1.71053	2.55238	2.93684	2.92708	1.96581
1.03428	0.311258	1.13684	2.14726	2.2551	1.61938	2.63559	0.607306	4.39062	1.88005	2.85956	3.0514	1.72809	2.34939	4.975	7.49065	5.90355	2.49231	3.84783	7.35152	2.18443	1.07895	2.55238	2.74737	3.14583	2.07692
1.02553	0.420162	1.30376	2.10274	2.33163	1.82007	2.77119	0.682648	4.16667	1.84434	2.75486	3.15888	1.79438	2.41017	5.09926	8.03271	6.10152	2.47692	3.97101	6.81212	2.22131	1.07895	2.2	2.87368	3.11458	1.88034
0.989788	0.949963	1.48722	2.07192	2.31122	1.84775	2.90678	0.673516	4.23958	1.90027	2.86771	2.95794	1.84719	2.49945	5.27206	8.09346	6.01015	2.47692	3.94565	6.95758	2.19262	0.763158	2.20952	2.74737	2.84375	1.99145
0.498906	1.0883	1.58095	2.07877	2.44388	1.80969	2.78814	0.6621	4.36458	1.96496	2.99498	3.14953	1.94382	2.5589	5.38382	8.20093	6.3401	2.44615	3.81159	7.0303	2.14754	0.434211	2.10476	2.93684	2.80208	1.91453
0.46973	1.2362	0.653133	1.81507	2.37755	1.57093	2.91525	0.552511	3.73438	1.97911	2.96991	2.93925	1.93596	1.9642	5.28456	7.19159	6.03046	2.49231	3.6087	6.87273	1.60246	0.302632	1.9619	2.36842	2.35417	1.05128
0.950401	1.41795	2.28321	1.94521	2.27041	1.95848	3.66949	0.885845	4.35417	2.24933	2.08777	3.08411	2.22809	2.1074	5.84926	7.34579	6.48731	1.33846	2.35507	2.97576	2.23361	0.460526	1.57143	3.15789	2.16667	1.81197
0.937272	1.55997	2.47118	2.00342	2.13265	1.85813	3.5678	1.03425	4.61979	2.26954	2.03386	3.16822	2.35843	2.22873	5.72721	7.87383	6.22843	1.53846	2.26087	6.05455	2.30328	0.565789	1.74286	2.83158	2.375	1.94872
0.972283	1.68801	2.48722	2.08219	2.0051	1.93772	3.68644	0.931507	4.40104	2.22978	2.07022	3.16822	2.46854	2.15558	6.14632	8.06542	5.73096	1.52308	2.21739	5.9697	2.40574	0.697368	1.64762	3.21053	2.47917	1.77778
0.982495	1.82487	2.52531	2.09932	1.76531	1.79239	4.02542	0.974886	4.5625	2.21968	2.04514	3.08411	2.2809	2.2621	5.99118	8.28037	5.7868	1.36923	2.18478	5.71515	2.40574	0.657895	1.42857	2.53684	2.20833	1.79487
1.01459	1.92715	2.59499	2.11644	1.69388	1.73356	3.78814	1.08447	4.59896	2.21563	1.98746	2.93925	2.28427	2.19204	5.88529	8.44392	6.04569	1.32308	2.17029	6.1697	2.42213	0.947368	1.4381	2.84211	2.125	1.5641
1.01823	1.93966	2.49173	2.10616	1.56122	1.56747	3.81356	0.988584	4.45833	2.23113	1.97868	3.02336	2.2573	2.23823	5.88015	8.16822	5.73096	1.41538	2.08696	5.86061	2.36885	0.894737	1.32381	2.64211	1.94792	1.69231
1.05762	2.00294	2.49774	2.15068	1.41837	1.50173	3.83051	0.997717	4.4375	2.2062	1.95235	2.86449	2.27191	2.17039	5.84632	8.26168	5.54822	1.35385	2.05072	5.96364	2.52459	1.15789	1.20952	2.83158	2.0625	1.52137
1.11087	2.01619	2.51078	2.15411	1.36224	1.6955	4	0.977169	4.40104	2.19137	1.84451	2.78037	2.1618	2.14762	5.79706	8.20093	5.67513	1.38462	2.00362	5.59394	2.43852	1	1.21905	2.74737	2.29167	1.68376
1.1116	2.00294	2.45363	2.09932	1.27551	1.7474	3.82203	1.0274	4.46354	2.219	1.8815	2.92991	2.20449	2.02055	5.74191	8.38318	5.85279	1.32308	1.98188	5.54545	2.40574	1.43421	1.01905	2.56842	2.32292	1.82051
1.08534	1.91832	2.40802	2.13356	1.22449	1.61246	3.76271	0.977169	4.08854	2.16442	1.81066	2.83645	2.10674	2.00575	5.59044	8.26636	5.67513	1.35385	2.00725	5.40606	2.45082	1.68421	1.20952	2.92632	1.90625	1.63248
1.05981	1.89478	2.33083	2.06164	1.07653	1.78201	3.79661	0.979452	4.21875	2.1624	1.82257	2.96262	1.95506	2.13282	5.49706	7.7757	5.82234	1.38462	1.99275	5.67273	2.38115	1.97368	1	2.51579	1.91667	1.70085
1.12327	1.86608	2.33985	2.13699	1.0102	1.70242	3.84746	1.01598	3.89062	2.16846	1.86708	2.86916	1.88539	2.09193	5.18235	8.1028	5.50761	1.43077	2.07609	5.38788	2.36475	2.40789	1.05714	2.16842	1.65625	1.5812
1.1663	1.7638	2.25213	2.21575	0.913265	1.70242	3.62712	0.938356	3.94271	2.19272	1.92038	3.01402	1.83933	2.04	5.00809	7.88785	5.35025	1.46154	2.08696	5.49091	2.39344	2.76316	0.904762	2.12632	1.67708	1.70085
1.14004	1.72553	2.27569	2.15753	0.862245	1.72318	3.5	1.02055	4.04688	2.20485	2.08025	2.97196	1.74382	1.9158	4.92868	7.6028	5.30457	1.46154	2.08333	5.39394	2.40574	3.61842	1.01905	2.46316	1.61458	1.67521
1.23778	1.6858	2.27769	2.09589	0.77551	1.75433	3.5339	1.00457	3.75521	2.41981	2.2094	2.93925	1.62472	1.89105	4.95441	7.3972	5.27919	1.36923	1.99275	4.81818	2.35246	4.61842	0.885714	2.04211	1.625	1.57265
1.24216	1.72774	2.17444	2.18493	0.719388	1.84775	3.5678	1.10959	3.5625	2.27291	2.11034	2.93458	1.65955	1.89061	4.76765	7.50467	5.08629	1.38462	2.11957	5.07273	2.30738	4.38158	0.752381	1.92632	1.65625	1.50427
1.32166	1.74246	2.15138	2.11301	0.668367	1.76817	3.39831	0.972603	3.45833	2.38612	2.01254	2.6028	1.5618	1.81436	4.62206	6.95794	4.92386	1.23077	1.8913	4.81212	2.34426	4.78947	0.87619	1.86316	1.34375	1.61538
1.28519	1.67991	2.0015	2.0274	0.647959	1.7301	3.21186	0.787671	3.53125	2.36725	1.9837	2.37383	1.55506	1.89414	4.55662	6.90654	4.77157	1.2	1.84058	4.90303	2.25	5.09211	0.838095	1.87368	1.5	1.47863
1.22538	1.70199	1.89524	2.00342	0.596939	1.75779	3.49153	0.817352	3.54688	2.34164	2.08213	2.42523	1.41236	1.85061	4.36912	7.19159	4.49746	1.23077	1.8587	4.68485	2.29508	4.76316	0.638095	1.91579	1.34375	1.62393
1.186	1.65342	1.86316	1.97945	0.520408	1.74394	3.12712	0.739726	3.25	2.35782	2.06708	2.17757	1.35506	1.7295	4.41176	6.79439	4.65482	1.23077	1.97101	4.55758	2.26639	4.93421	0.695238	1.71579	1.16667	1.29915
1.2407	1.63797	1.82807	1.96233	0.392857	1.82353	3.55932	0.703196	3.1875	2.33221	2.11724	2.23832	1.31348	1.6979	4.27353	6.42056	4.29949	1.15385	1.92754	4.64848	2.15984	4.53947	0.514286	1.61053	1.15625	1.47863
1.1663	1.64091	1.83659	1.91096	0.357143	1.66436	3	0.657534	3.19271	2.18801	2.0395	2.20561	1.34831	1.61193	4.30735	6.6028	4.13198	1.10769	2.00725	4.64848	2.08607	4.36842	0.533333	1.70526	1.15625	1.35043
1.07732	1.63503	1.8391	1.85959	0.285714	1.80969	2.9322	0.678082	3	2.23787	2.04514	2.25701	1.18876	1.54895	4.31029	6.48598	4.05584	0.984615	2.03261	4.53333	2.09426	4.17105	0.695238	1.46316	0.916667	1.40171
1.1116	1.63061	1.72982	1.75	0.244898	1.72318	3.0678	0.69863	2.66667	2.06873	2.16614	2.09346	1.19888	1.53856	4.22868	6.3972	3.69036	0.861538	1.92754	4.40606	2.06967	4.28947	0.533333	1.45263	0.916667	1.23077
1.18381	1.61737	1.69724	1.7226	0.25	1.69204	2.84746	0.6621	2.88542	2.07884	2.08652	2.14953	1.26629	1.46188	4.30074	5.96262	3.85787	1	1.88768	4.33939	2.08607	3.72368	0.533333	1.41053	0.947917	1.4359
1.14296	1.55408	1.58797	1.68836	0.183673	1.56055	2.87288	0.716895	2.64583	1.96631	2.06583	2.18224	1.20225	1.37657	4.32132	5.85981	3.48731	0.876923	1.88043	4.47879	2.06148	4	0.447619	1.41053	0.90625	1.13675
1.17797	1.53569	1.54586	1.66781	0.163265	1.47751	2.59322	0.687215	2.49479	1.93329	1.95799	1.97664	1.19101	1.3768	4.36397	5.74766	3.42132	0.846154	2.1087	4	2.10246	3.39474	0.819048	1.32632	0.8125	1.17949
1.18016	1.53863	1.51779	1.66438	0.178571	1.45675	2.50847	0.550228	2.46354	1.90431	1.9373	1.92523	1.1382	1.21525	4.35147	5.69159	3.39594	0.723077	2.01449	3.87273	2.12295	3.34211	0.552381	1.24211	0.895833	1.05128
1.17724	1.51214	1.46466	1.60616	0.127551	1.40484	2.64407	0.543379	2.40104	1.83288	1.91661	1.95794	1.30899	1.21856	4.31838	5.43458	3.15736	0.846154	2.01449	3.90303	2.11475	3.34211	0.619048	1.21053	0.78125	1.15385
1.10722	1.5482	1.48622	1.54452	0.122449	1.44983	2.19492	0.53653	2.17188	1.93261	1.84765	1.78505	1.37865	1.18409	4.275	5.1028	2.88832	0.8	1.83333	3.5697	2.03279	3.22368	0.47619	1.13684	0.760417	0.905983
1.12035	1.58646	1.38195	1.53082	0.147959	1.49135	2.44068	0.557078	2.08333	1.94677	1.91223	1.73832	1.43708	1.15072	4.24926	4.54206	3.06091	0.784615	1.8442	3.50303	1.97951	3.48684	0.352381	1.17895	0.65625	0.820513
1.13786	1.58205	1.36391	1.4863	0.158163	1.34948	2.28814	0.582192	2.02604	1.88949	1.8163	1.57009	1.36629	1.13856	4.33971	4.78037	2.86802	0.753846	1.8913	3.34545	2.06557	2.96053	0.32381	0.894737	0.666667	0.794872
1.10503	1.55335	1.39398	1.40068	0.204082	1.34256	2.26271	0.522831	1.79167	1.82817	1.75423	1.6028	1.43146	1.0895	4.79118	4.60748	2.72589	0.676923	1.9058	3.29697	1.93443	2.64474	0.514286	1.17895	0.71875	0.905983
1.16557	1.64091	1.42957	1.35274	0.193878	1.14533	2.32203	0.52968	1.79688	1.84367	1.69342	1.55607	1.37865	1.06785	5.19853	4.41121	2.75635	0.584615	1.68478	3.01212	1.97951	2.61842	0.333333	1.13684	0.6875	0.811966
1.18162	1.55261	1.45965	1.2637	0.290816	1.35986	2.05932	0.495434	1.71875	1.77561	1.65705	1.39252	1.36854	1.04884	5.38529	4.66355	2.58883	0.569231	1.80797	2.8303	1.97951	2.61842	0.419048	1.02105	0.760417	0.74359
1.24654	1.60412	1.38897	1.20548	0.260204	1.25952	2.10169	0.399543	1.59375	1.75809	1.61254	1.35514	1.32022	1.09304	5.31103	4.63084	2.56345	0.538462	1.6087	2.54545	1.86475	2.55263	0.4	0.926316	0.520833	0.700855
1.15171	1.63208	1.42506	1.13014	0.244898	1.34948	1.95763	0.56621	1.48438	1.62466	1.68339	1.28505	1.32472	1.0358	5.34926	4.31776	2.25381	0.569231	1.50362	2.53333	1.88525	2.36842	0.333333	0.947368	0.510417	0.606838
1.19402	1.64091	1.29774	1.08904	0.25	1.25606	1.80508	0.440639	1.38542	1.57143	1.49216	1.28037	1.26629	1.03536	5.25294	4.02336	2.38579	0.461538	1.40217	2.26667	1.94672	2.07895	0.361905	0.947368	0.447917	0.487179
1.20423	1.59382	1.26516	1.05137	0.219388	1.29066	1.66949	0.40411	1.3125	1.50606	1.42696	1.23364	1.15618	1.01459	5.1	4.20093	2.16751	0.353846	1.26087	2.26061	1.88525	2.26316	0.52381	0.621053	0.458333	0.555556
1.19621	1.5894	1.26917	0.982877	0.214286	1.26644	1.73729	0.481735	1.35938	1.42925	1.1931	1.1028	1.23595	1.01348	5.21103	3.82243	2.13706	0.492308	1.1413	2.13333	1.88934	2.01316	0.504762	0.736842	0.541667	0.42735
1.17214	1.64386	1.27168	0.90411	0.193878	1.08997	1.5	0.52968	1.20312	1.35243	1.10784	1.02336	1.12584	1.01657	5.07868	3.3785	2.17259	0.338462	1.11594	2.0303	1.90574	1.88158	0.27619	0.536842	0.302083	0.418803
1.21007	1.63576	1.23008	0.886986	0.188776	1.09343	1.36441	0.461187	1.25521	1.36321	1.01567	1.10748	1.09326	0.968619	4.96765	3.23832	2.12183	0.384615	1.05797	1.87273	1.81557	1.85526	0.419048	0.884211	0.375	0.273504
1.20861	1.60854	1.2	0.921233	0.204082	1.11073	1.4322	0.502283	1.33854	1.32547	0.996238	1.06542	1.06067	0.951823	4.78088	3.04206	1.99492	0.415385	1.27174	1.91515	1.76639	1.75	0.447619	0.578947	0.416667	0.350427
1.186	1.57763	1.21604	0.808219	0.19898	0.982699	1.25424	0.586758	1.13542	1.30997	1.01567	0.948598	0.985393	0.930387	4.77426	3.01869	1.8934	0.323077	1.06159	1.57576	1.78279	1.35526	0.409524	0.863158	0.479167	0.17094
1.15609	1.5872	1.13534	0.777397	0.132653	1.02422	1.45763	0.43379	1.08333	1.23383	0.975549	1	0.980899	0.910497	4.62647	2.8271	1.77665	0.323077	0.913043	1.76364	1.79918	1.27632	0.390476	0.652632	0.354167	0.435897
1.12181	1.6284	1.10677	0.69863	0.117347	0.861592	1.12712	0.43379	1.17188	1.17655	0.982445	0.906542	0.941573	0.860552	4.48529	2.85514	1.99492	0.276923	0.916667	1.51515	1.7459	1.46053	0.352381	0.821053	0.416667	0.290598
1.14296	1.63208	1.15689	0.636986	0.0816327	0.889273	1.28814	0.486301	0.963542	1.21226	1.00627	0.813084	0.917978	0.892597	4.19706	2.51402	2.04569	0.215385	0.833333	1.41818	1.85656	1.43421	0.285714	0.421053	0.239583	0.239316
1.10795	1.61369	1.1188	0.59589	0.102041	0.816609	1.05932	0.401826	1.03125	1.23046	1.04138	0.724299	0.874157	0.819889	3.88971	2.59813	1.7665	0.153846	0.757246	1.42424	1.80738	1.25	0.352381	0.336842	0.229167	0.162393
1.10212	1.58057	1.12331	0.59589	0.0459184	0.681661	1.16102	0.349315	0.90625	1.24124	1.03009	0.803738	0.834831	0.870276	3.74485	2.54206	1.77665	0.138462	0.735507	1.24848	1.85246	1.06579	0.247619	0.442105	0.416667	0.239316
1.08242	1.52171	1.07619	0.547945	0.0204082	0.653979	1.19492	0.479452	0.911458	1.27426	0.996865	0.719626	0.774157	0.8	3.70662	2.54673	1.58376	0.0461538	0.699275	1.35152	1.94262	1.18421	0.161905	0.336842	0.395833	0.213675
1.09482	1.53495	1.07719	0.496575	0.0153061	0.626298	1.08475	0.413242	0.786458	1.20822	1.05141	0.658879	0.767416	0.753591	3.51544	2.51402	1.80711	0.0153846	0.626812	1.21212	1.95902	1.06579	0.380952	0.673684	0.208333	0.0683761
1.0868	1.58205	1.06967	0.465753	0.0153061	0.595156	0.872881	0.493151	0.859375	1.2035	0.943574	0.714953	0.703371	0.683536	3.35441	2.33178	1.54315	0.0923077	0.746377	1.03636	1.87295	1.14474	0.228571	0.410526	0.197917	0.282051
1.01021	1.59455	1.09875	0.434932	-0.0153061	0.553633	0.923729	0.527397	0.822917	1.09838	0.91348	0.509346	0.68764	0.642652	3.28971	2.4486	1.60914	0.0461538	0.594203	1.07879	1.86885	0.868421	0.247619	0.378947	0.177083	0.0854701
1.00438	1.58278	1.1193	0.321918	0.0306122	0.532872	1.05085	0.468037	0.885417	1.14623	0.885893	0.598131	0.706742	0.607514	3.15515	2.3271	1.57868	0.138462	0.73913	0.975758	1.89754	0.934211	0.266667	0.473684	0.21875	0.0940171
0.91612	1.57763	1.13484	0.318493	0	0.373702	1.16102	0.390411	0.786458	1.05593	0.89279	0.481308	0.611236	0.603094	3.20074	2.09813	1.49746	0.123077	0.721014	0.945455	1.80738	1.17105	0.266667	0.452632	0.291667	0.25641
0.834427	1.52097	1.13283	0.260274	0.0357143	0.404844	0.915254	0.456621	0.729167	1.04852	0.845141	0.542056	0.589888	0.617017	3.10956	1.95794	1.40102	0.0769231	0.692029	0.975758	1.79508	1.32895	0.12381	0.442105	0.25	0.25641
0.695842	1.59161	1.15639	0.321918	0	0.352941	0.855932	0.538813	0.729167	1.0128	0.82069	0.485981	0.577528	0.558011	3.05735	2	1.38579	0.153846	0.637681	0.957576	1.81148	1.27632	0.304762	0.389474	0.270833	0.0854701
0.637491	1.57395	1.10025	0.273973	0.0357143	0.470588	1.05085	0.417808	0.666667	1.05121	0.762382	0.434579	0.583146	0.498564	2.91029	1.74299	1.35533	0.107692	0.528986	0.836364	1.7541	0.789474	0.304762	0.431579	0.114583	0.145299
0.56674	1.56291	1.07018	0.219178	0.0204082	0.242215	0.923729	0.484018	0.578125	1.03032	0.70094	0.401869	0.506742	0.534807	2.92426	1.85514	1.2335	0	0.438406	0.793939	1.69672	1	0.32381	0.442105	0.197917	0.034188
0.504012	1.52759	1.08271	0.260274	0.0408163	0.321799	0.923729	0.577626	0.703125	1.05391	0.670219	0.373832	0.483146	0.540331	2.84412	1.87383	1.34518	0.0461538	0.467391	0.793939	1.80328	1.05263	0.466667	0.168421	0.177083	0.00854701
0.485777	1.50773	1.06867	0.263699	0.0918367	0.193772	0.830508	0.342466	0.71875	1.01482	0.697806	0.453271	0.505618	0.557348	2.76324	1.71028	1.20305	0.0153846	0.528986	0.763636	1.68033	0.894737	0.228571	0.4	0.145833	0.034188
0.487965	1.47829	1.06065	0.246575	0.0765306	0.224913	0.898305	0.369863	0.755208	1.01078	0.70094	0.481308	0.5	0.502983	2.66029	1.70561	1.11675	0.0923077	0.398551	0.806061	1.64344	1.02632	0.180952	0.273684	0.09375	-0.042735
0.500365	1.41943	1.04561	0.215753	0.102041	0.245675	0.881356	0.424658	0.541667	1.06199	0.658307	0.453271	0.453933	0.514475	2.68309	1.75234	1.13706	0.0769231	0.344203	0.618182	1.63115	0.736842	0.228571	0.294737	0.135417	0.0769231
0.511306	1.37454	1.06266	0.205479	0.0969388	0.155709	0.805085	0.388128	0.604167	1.00135	0.661442	0.415888	0.466292	0.456575	2.5625	1.69159	1.16751	-0.0769231	0.373188	0.684848	1.70082	0.881579	0.257143	0.347368	0.15625	-0.034188
0.488694	1.3532	1.05263	0.157534	0.0561224	0.100346	0.872881	0.442922	0.59375	0.986523	0.642633	0.537383	0.51573	0.350276	2.52647	1.70093	1.1269	-0.0307692	0.32971	0.757576	1.61885	0.894737	0.295238	0.273684	0.135417	-0.102564
0.53027	1.36056	1.0386	0.109589	0.0765306	0.110727	0.923729	0.479452	0.739583	0.966307	0.685893	0.584112	0.468539	0.297238	2.50515	1.62617	1.05076	-0.0307692	0.398551	0.70303	1.47541	0.684211	0.209524	0.294737	0.270833	0.0683761
0.550693	1.34584	1.02657	0.0958904	0.117347	0.083045	0.864407	0.5	0.645833	0.898248	0.68652	0.462617	0.429213	0.271381	2.45441	1.54673	0.969543	0	0.365942	0.624242	1.45902	0.934211	0.171429	0.526316	0.260417	-0.042735
0.568928	1.31273	1.00551	0.0616438	0.158163	0.0622837	0.754237	0.472603	0.677083	0.855795	0.680251	0.588785	0.416854	0.244641	2.41103	1.53271	1.04569	0	0.217391	0.515152	1.45902	0.789474	0.2	0.0842105	0.09375	0.025641
0.571116	1.33775	1.00251	0.0547945	0.127551	0.0588235	0.847458	0.557078	0.734375	0.822102	0.704702	0.443925	0.477528	0.229613	2.40882	1.40187	0.918782	0.0153846	0.369565	0.666667	1.36885	0.657895	0.0666667	0.263158	0.03125	-0.034188
0.608315	1.30464	1.02155	0.0136986	0.163265	0.00346021	0.754237	0.484018	0.526042	0.820081	0.709091	0.448598	0.539326	0.216133	2.35	1.41121	0.989848	-0.0153846	0.268116	0.527273	1.43033	0.763158	0.238095	0.147368	0.28125	0
0.640408	1.3039	1.03158	0.0136986	0.168367	-0.0588235	0.720339	0.513699	0.479167	0.794474	0.722884	0.457944	0.535955	0.218785	2.27426	1.3972	0.893401	0.138462	0.326087	0.515152	1.44262	0.710526	0.209524	0.357895	0.21875	-0.119658
0.644055	1.29433	0.992481	0.0239726	0.153061	-0.0865052	0.90678	0.465753	0.453125	0.773585	0.673981	0.233645	0.493258	0.249724	2.34779	1.41589	0.857868	0.0307692	0.300725	0.454545	1.36475	0.907895	0.247619	0.4	0.145833	-0.034188
0.684902	1.3142	0.989975	-0.0376712	0.137755	-0.100346	0.754237	0.538813	0.432292	0.725067	0.648276	0.369159	0.466292	0.252597	2.16324	1.45327	0.786802	-0.0461538	0.322464	0.381818	1.39754	0.671053	0.190476	0.326316	0.03125	-0.119658
0.680525	1.32892	1.02556	-0.00684932	0.163265	-0.0934256	0.652542	0.502283	0.5	0.576146	0.551724	0.242991	0.453933	0.297017	2.15809	1.23832	0.928934	-0.0153846	0.199275	0.466667	1.40574	0.855263	0.104762	0.368421	0.322917	-0.0769231
0.687819	1.25901	1.00802	-0.0410959	0.107143	-0.0588235	0.805085	0.534247	0.588542	0.570081	0.394984	0.299065	0.450562	0.303204	2.11912	1.26168	0.873096	0.0461538	0.347826	0.321212	1.38934	0.631579	0.171429	0.242105	0.25	0
0.700948	1.27741	1.00752	0.0136986	0.117347	-0.103806	0.59322	0.534247	0.546875	0.416442	0.341693	0.200935	0.358427	0.300773	2.12647	1.07477	0.756345	0.0615385	0.25	0.230303	1.43033	0.671053	0.142857	0.368421	0.197917	-0.034188
0.746171	1.23915	1.03208	-0.0205479	0.102041	-0.0622837	0.567797	0.56621	0.53125	0.40027	0.209404	0.303738	0.35618	0.278895	2.05588	1.18224	0.77665	-0.0615385	0.213768	0.260606	1.31967	0.763158	0.133333	0.147368	0.1875	-0.042735
0.827863	1.18322	1.02957	-0.0376712	0.132653	-0.155709	0.59322	0.511416	0.369792	0.390162	0.061442	0.285047	0.31573	0.248619	2.02574	1.02804	0.639594	0.0615385	0.206522	0.278788	1.39344	0.763158	0.161905	0.147368	0.239583	-0.0769231
0.923414	1.14275	0.953885	-0.0547945	0.107143	-0.16609	0.635593	0.474886	0.473958	0.423854	0.00626959	0.285047	0.352809	0.29989	1.98015	1.01869	0.720812	-0.0153846	0.15942	0.290909	1.29098	0.789474	-0.0285714	0.221053	0.1875	-0.042735
0.876003	1.09124	0.898747	0	0.107143	-0.16609	0.70339	0.472603	0.359375	0.423181	0.015674	0.228972	0.234831	0.314917	1.98897	1.07944	0.588832	-0.0461538	0.166667	0.272727	1.34016	0.763158	0.314286	0.284211	0.125	0.00854701
0.921225	1.00736	0.932832	-0.0821918	0.107143	-0.16263	0.449153	0.625571	0.296875	0.454178	0.0564263	0.205607	0.207865	0.309171	2.00074	0.990654	0.624366	-0.0153846	0.155797	0.254545	1.31148	0.592105	0.209524	0.305263	0.197917	-0.119658
0.920496	0.983812	0.914787	-0.0582192	0.0561224	-0.148789	0.533898	0.554795	0.28125	0.478437	-0.0163009	0.280374	0.191011	0.365746	1.88971	0.915888	0.705584	0.0307692	0.242754	0.333333	1.41803	0.960526	0.0285714	0.305263	0.25	-0.111111
0.979577	0.910964	0.938346	-0.0582192	0.0561224	-0.179931	0.728814	0.577626	0.364583	0.465633	0.0144201	0.168224	0.224719	0.335249	1.88309	0.962617	0.57868	0.0307692	0.0652174	0.260606	1.33607	0.828947	0.0666667	0.378947	0.125	-0.119658
0.971554	0.890361	0.87218	-0.0582192	0.0663265	-0.16609	0.440678	0.611872	0.229167	0.501348	0.0263323	0.196262	0.177528	0.320663	1.88235	1.02804	0.588832	-0.0615385	-0.00362319	0.224242	1.31557	0.539474	0.0666667	0.273684	0.197917	0.034188
0.984683	0.856512	0.916792	-0.0410959	0.153061	-0.17301	0.355932	0.621005	0.395833	0.543127	0.0482759	0.182243	0.105618	0.28221	1.88529	1.1028	0.573604	-0.0615385	0.0144928	0.309091	1.32377	0.513158	0.180952	0.410526	0.125	-0.00854701
1	0.756439	0.949373	-0.0856164	0.0714286	-0.16955	0.576271	0.559361	0.322917	0.540431	0.0902821	0.214953	0.0707865	0.274917	1.84412	0.948598	0.573604	-0.0615385	0.155797	0.175758	1.26639	0.684211	0.142857	0.4	0.177083	0.102564
0.986871	0.711553	0.969424	-0.0376712	0.0255102	-0.221453	0.40678	0.557078	0.161458	0.530323	0.0564263	0.163551	0.0494382	0.259448	1.90956	0.995327	0.492386	0.0461538	0.0398551	0.163636	1.2459	0.539474	0.133333	0.368421	0.239583	-0.111111
0.956236	0.680648	0.934336	-0.0787671	0.0561224	-0.193772	0.330508	0.60274	0.395833	0.486523	0.157367	0.191589	0.0292135	0.306519	1.80882	1.20561	0.472081	0	0.0108696	0.157576	1.28689	0.657895	0.228571	0.0842105	0.21875	-0.042735
0.93946	0.660044	0.949875	-0.0582192	0.0408163	-0.186851	0.381356	0.575342	0.260417	0.497978	0.339185	0.182243	0.0438202	0.298564	1.81618	0.929907	0.51269	0.0923077	0	0.115152	1.28279	0.592105	0.133333	0.284211	0.145833	-0.0854701
0.874544	0.65195	0.897744	-0.0239726	0.0510204	-0.183391	0.5	0.671233	0.328125	0.525606	0.33605	0.275701	0.0516854	0.268729	1.78603	1.01869	0.51269	-0.0769231	0.0543478	0.212121	1.20492	0.565789	0.171429	0.147368	0.104167	-0.042735
0.820569	0.618837	0.891228	-0.0958904	0.0255102	-0.217993	0.313559	0.60274	0.317708	0.533693	0.41442	0.172897	-0.0202247	0.265193	1.75368	0.883178	0.497462	0	0.0543478	0.163636	1.14754	0.513158	0.161905	0.178947	0.104167	-0.162393
0.83078	0.559235	0.854135	-0.0513699	0.0102041	-0.155709	0.288136	0.582192	0.322917	0.497978	0.454545	0.102804	-0.0426966	0.191823	1.69706	0.82243	0.411168	-0.0307692	0	0.230303	1.16803	0.644737	0.0380952	0.178947	0.166667	0.0512821
0.837345	0.526122	0.842607	-0.0513699	-0.0255102	-0.287197	0.457627	0.586758	0.276042	0.420485	0.421944	0.224299	-0.0426966	0.0879558	1.69485	0.850467	0.522843	-0.0615385	0	0.2	1.17213	0.5	0.180952	0.347368	0.166667	-0.264957
0.859227	0.487859	0.836591	-0.0342466	0.0153061	-0.224913	0.474576	0.609589	0.28125	0.423181	0.438871	0.0514019	-0.155056	0.0729282	1.64338	0.864486	0.51269	-0.0461538	-0.0108696	0.157576	1.16803	0.486842	0.104762	0.168421	0.21875	-0.0598291
0.803793	0.48933	0.785464	-0.0171233	0.0561224	-0.32526	0.686441	0.550228	0.338542	0.392183	0.481505	0.17757	-0.164045	0.0371271	1.58309	0.850467	0.553299	-0.0615385	0.00362319	0.10303	1.21311	0.578947	0.104762	0.178947	-0.0104167	-0.119658
0.810357	0.493745	0.811028	-0.0582192	0.0459184	-0.280277	0.669492	0.388128	0.276042	0.416442	0.462069	0.121495	-0.185393	0.0309392	1.63015	0.78972	0.619289	-0.0153846	0.0181159	0.0848485	1.19262	0.592105	0.247619	0.0947368	0.25	-0.025641
0.789934	0.484915	0.767419	-0.0821918	0.0561224	-0.245675	0.601695	0.479452	0.447917	0.394205	0.511599	0.158879	-0.132584	0.0103867	1.62794	0.817757	0.532995	0	0.0615942	0.163636	1.21311	0.460526	0.0857143	0.568421	0.104167	-0.102564
0.859227	0.461369	0.738346	-0.0719178	0.0612245	-0.221453	0.669492	0.43379	0.177083	0.362534	0.517868	0.0934579	-0.149438	-0.0183425	1.59485	0.813084	0.51269	0.0307692	-0.057971	0.0606061	1.17213	0.421053	0.0666667	0.136842	0.104167	-0.119658
0.816193	0.463576	0.733333	-0.10274	0.107143	-0.273356	0.644068	0.534247	0.317708	0.326819	0.512853	0.0981308	-0.203371	-0.0039779	1.54706	0.878505	0.431472	-0.0461538	-0.0869565	0.151515	1.20492	0.447368	0.0571429	0.431579	0.104167	-0.0683761
0.800146	0.477557	0.715288	-0.0856164	0.142857	-0.252595	0.694915	0.413242	0.34375	0.37062	0.532915	0.0327103	-0.185393	-0.0190055	1.575	0.915888	0.48731	-0.0461538	-0.0217391	0.0969697	1.18852	0.5	0.0666667	0.231579	0.1875	-0.17094
0.826404	0.48418	0.746366	-0.0787671	0.112245	-0.269896	0.59322	0.276256	0.3125	0.361186	0.584953	0.0841122	-0.144944	-0.0194475	1.54485	0.771028	0.51269	0.0307692	-0.112319	0.0848485	1.22951	0.184211	0.0285714	0.273684	0.145833	-0.042735
0.850474	0.485651	0.675188	-0.0924658	0.107143	-0.307958	0.70339	0.27169	0.28125	0.345013	0.543574	0.0560748	-0.142697	-0.00419889	1.53676	0.827103	0.431472	0.107692	-0.0398551	0.0666667	1.19672	0.421053	0.047619	0.0421053	0.197917	-0.119658
0.827863	0.492274	0.655138	-0.0753425	0.0969388	-0.318339	0.737288	0.262557	0.395833	0.321429	0.620063	0.0747664	-0.197753	0.00618785	1.49265	0.663551	0.502538	-0.0153846	-0.123188	0.00606061	1.21311	0.328947	0.104762	0.4	0.270833	-0.17094
0.846827	0.47535	0.690226	-0.0958904	0.102041	-0.318339	0.762712	0.278539	0.260417	0.301887	0.652665	0.0560748	-0.134831	0.00552486	1.50147	0.82243	0.482233	-0.0307692	-0.0543478	0.127273	1.13525	0.578947	-0.161905	0.305263	0.114583	-0.0769231
0.856309	0.451803	0.746867	-0.0787671	0.102041	-0.280277	0.805085	0.086758	0.296875	0.320755	0.679624	0.0607477	-0.107865	-0.0243094	1.47941	0.747664	0.401015	-0.0153846	-0.0942029	0.0545455	1.18033	0.631579	0.142857	0.210526	0.0520833	-0.0854701
0.889132	0.458425	0.749373	-0.0684932	0.132653	-0.235294	0.779661	0.152968	0.390625	0.291105	0.739812	0.0233645	-0.0550562	-0.0174586	1.38897	0.616822	0.675127	-0.0461538	-0.0471014	0.0969697	1.15164	0.605263	0.142857	0.0526316	0.239583	0.017094
0.872356	0.446652	0.732331	-0.0924658	0.0765306	-0.280277	0.686441	0.0753425	0.59375	0.304582	0.769279	-0.0327103	-0.0235955	-0.04	1.45588	0.668224	0.451777	-0.0615385	-0.0615942	0.0909091	1.11475	0.684211	0.142857	0.263158	0.21875	-0.179487
0.885485	0.423841	0.79198	-0.0821918	0.127551	-0.252595	0.711864	0.0159817	0.432292	0.338949	0.778683	0.0373832	-0.0516854	-0.0552486	1.41544	0.649533	0.588832	-0.0153846	-0.119565	0.0666667	1.11066	0.447368	0.0571429	0.326316	0.125	-0.042735
0.884756	0.408389	0.787469	-0.130137	0.0867347	-0.301038	0.584746	0.0981735	0.416667	0.347035	0.821317	0.107477	-0.0303371	-0.0274033	1.37574	0.654206	0.598985	-0.0153846	-0.177536	0.0909091	1.13934	0.447368	0.161905	0.368421	0.135417	-0.00854701
0.851204	0.409124	0.837594	-0.0342466	0.0867347	-0.280277	0.483051	0.0479452	0.463542	0.333558	0.833229	0.0607477	0.0134831	0.00596685	1.38235	0.593458	0.51269	0	-0.173913	0.109091	1.04508	0.526316	0.0571429	0.210526	0.15625	-0.111111
0.838804	0.403238	0.792481	-0.0513699	0.0816327	-0.318339	0.618644	0.127854	0.395833	0.340297	0.867712	-0.0280374	0.0382022	0.0351381	1.31765	0.439252	0.441624	-0.0461538	-0.173913	0.0484848	0.881148	0.434211	-0.0285714	0.284211	0.0416667	-0.0769231
0.822028	0.391464	0.798998	-0.0753425	0.0867347	-0.314879	0.508475	-0.0456621	0.40625	0.316712	0.778683	0.102804	0.0685393	0.0771271	1.30074	0.425234	0.527919	0.0153846	-0.148551	0.0424242	0.770492	0.605263	0.0952381	0.136842	0.0104167	-0.111111
0.820569	0.414275	0.785464	-0.10274	0.117347	-0.3391	0.59322	0.0479452	0.4375	0.384771	0.819436	0.0700935	0.123596	0.0651934	1.33971	0.476636	0.517766	0.0461538	-0.105072	0.0787879	0.737705	0.473684	0.142857	0.326316	0.0833333	-0.145299
0.796499	0.41869	0.796491	-0.109589	0.0816327	-0.349481	0.508475	0.171233	0.458333	0.41779	0.786834	0.0140187	0.133708	0.0773481	1.3375	0.481308	0.502538	-0.0923077	-0.184783	-0.0606061	0.733607	0.434211	0	-0.0210526	0.09375	-0.111111
0.817651	0.432671	0.742356	-0.0993151	0.112245	-0.401384	0.533898	0.06621	0.473958	0.372642	0.90094	0.046729	0.159551	0.10453	1.23824	0.504673	0.375635	-0.123077	-0.228261	0.0606061	0.614754	0.565789	-0.0190476	-0.0526316	0.104167	-0.153846
0.827863	0.435614	0.783459	-0.126712	0.0663265	-0.346021	0.381356	0.0228311	0.442708	0.351078	0.898433	0.0327103	0.196629	0.158011	1.28824	0.369159	0.48731	0.0307692	-0.15942	0.0242424	0.606557	0.407895	0.0571429	0.136842	0.270833	-0.136752
0.845368	0.412068	0.790977	-0.0924658	0.0663265	-0.283737	0.432203	0.109589	0.484375	0.36186	0.852665	0	0.178652	0.236685	1.22721	0.509346	0.492386	-0.0307692	-0.141304	0.0666667	0.557377	0.565789	0.0380952	0.0210526	-0.0104167	-0.042735
0.866521	0.422369	0.814035	-0.0993151	0.0459184	-0.359862	0.457627	0.00684932	0.416667	0.311321	0.855799	0.0700935	0.233708	0.248177	1.25735	0.406542	0.385787	-0.123077	-0.217391	0.0424242	0.557377	0.315789	-0.0952381	0	0.135417	-0.0940171
0.902991	0.469463	0.8	-0.113014	0.0918367	-0.33564	0.423729	-0.0251142	0.385417	0.348383	0.863323	0.00934579	0.286517	0.236243	1.27574	0.443925	0.507614	-0.0153846	-0.195652	0.0606061	0.504098	0.421053	0.0857143	-0.0315789	0.135417	-0.162393
0.87965	0.492274	0.785965	-0.14726	0.0357143	-0.321799	0.550847	-0.0479452	0.338542	0.307278	0.85768	0.0654206	0.25618	0.238895	1.16691	0.429907	0.441624	-0.0153846	-0.25	-0.030303	0.512295	0.644737	-0.0190476	0.284211	0.1875	-0.128205
0.864333	0.504047	0.846617	-0.15411	0.0306122	-0.342561	0.415254	-0.0273973	0.427083	0.287062	0.656426	0.0654206	0.293258	0.228729	1.18088	0.275701	0.553299	-0.0923077	-0.228261	0.0121212	0.422131	0.368421	0.047619	0.178947	0.114583	-0.0683761
0.826404	0.540103	0.775439	-0.0650685	0.0510204	-0.373702	0.347458	-0.0913242	0.375	0.269542	0.409404	0.0607477	0.291011	0.225635	1.15588	0.448598	0.51269	0	-0.231884	-0.030303	0.528689	0.407895	0.0761905	0.263158	0	-0.188034
0.848286	0.609272	0.814536	-0.0924658	-0.00510204	-0.321799	0.449153	-0.06621	0.3125	0.263477	0.0865204	0.0327103	0.267416	0.220552	1.29265	0.448598	0.472081	0.0153846	-0.282609	0.0848485	0.471311	0.539474	-0.0380952	0.105263	0	-0.162393
0.848286	0.714496	0.780952	-0.157534	0.00510204	-0.349481	0.398305	-0.0936073	0.375	0.260782	-0.0727273	0.00934579	0.273034	0.204199	1.41765	0.345794	0.598985	0.0461538	-0.235507	0.0363636	0.446721	0.381579	0.12381	0.0421053	0.03125	-0.179487
0.854121	0.850625	0.794486	-0.171233	-0.0102041	-0.359862	0.279661	-0.0844749	0.395833	0.293127	-0.174922	0.0186916	0.268539	0.210608	1.50368	0.420561	0.446701	-0.0461538	-0.289855	0.10303	0.467213	0.407895	-0.0380952	-0.126316	0.208333	-0.0769231
0.844639	1.08241	0.73584	-0.171233	0	-0.318339	0.271186	-0.0342466	0.322917	0.257412	-0.19373	-0.0747664	0.270787	0.19558	1.49044	0.462617	0.553299	0.0769231	-0.326087	0.0848485	0.479508	0.421053	0.152381	-0.0315789	-0.0729167	0.034188
0.91539	1.25533	0.690226	-0.164384	-0.00510204	-0.276817	0.372881	-0.0365297	0.255208	0.261456	-0.157367	-0.0186916	0.21236	0.19337	1.58529	0.331776	0.634518	0	-0.202899	0.0606061	0.463115	0.605263	0.133333	0.0421053	0.197917	-0.042735
0.880379	1.30022	0.611529	-0.208904	0.0306122	-0.366782	0.372881	-0.0707763	0.296875	0.257412	-0.0601881	0.0280374	0.219101	0.170608	1.62353	0.266355	0.543147	-0.0615385	-0.289855	0	0.467213	0.447368	0.104762	0.0210526	0.0520833	-0.0683761
0.835886	1.33186	0.642606	-0.188356	0.0918367	-0.318339	0.305085	-0.06621	0.260417	0.216981	-0.0231975	0.0186916	0.213483	0.14232	1.95147	0.294393	0.527919	-0.0923077	-0.278986	-0.0242424	0.508197	0.434211	0.161905	-0.0315789	0.0520833	-0.0940171
0.7469	1.42973	0.684712	-0.167808	0.209184	-0.359862	0.228814	-0.13242	0.291667	0.197439	-0.015674	0.0280374	0.203371	0.0678453	1.95441	0.294393	0.395939	-0.0923077	-0.333333	-0.030303	0.483607	0.302632	0.0952381	0.178947	0.0104167	-0.145299
0.726477	1.43414	0.627569	-0.181507	0.178571	-0.290657	0.177966	-0.0388128	0.447917	0.219677	0.0501567	-0.0186916	0.192135	0.038011	2.05221	0.327103	0.42132	0	-0.304348	-0.00606061	0.47541	0.434211	0.142857	-0.105263	-0.0520833	-0.111111
0.654996	1.45254	0.689724	-0.205479	0.142857	-0.304498	0.20339	-0.0707763	0.260417	0.216981	0.126019	0.0794393	0.170787	0.0289503	2.20074	0.299065	0.477157	-0.0307692	-0.268116	-0.0121212	0.483607	0.434211	0.161905	0.136842	0	0.0683761
0.628009	1.48712	0.698246	-0.195205	0.127551	-0.283737	0.305085	-0.175799	0.239583	0.231132	-0.0294671	-0.0607477	0.180899	0.0928177	2.2	0.252336	0.456853	0.0307692	-0.268116	0.0181818	0.487705	0.447368	0.0761905	0.2	-0.0625	-0.136752
0.608315	1.49448	0.758897	-0.167808	0.122449	-0.249135	0.177966	-0.125571	0.385417	0.22372	-0.106583	-0.0046729	0.117978	0.101215	2.41176	0.303738	0.324873	0	-0.289855	-0.030303	0.532787	0.210526	0.152381	0.0631579	0.0625	-0.145299
0.617797	1.47167	0.789975	-0.174658	0.0306122	-0.297578	0.271186	-0.180365	0.432292	0.215633	-0.0777429	-0.0186916	0.146067	0.136354	2.51691	0.495327	0.446701	-0.0615385	-0.307971	0.0484848	0.581967	0.263158	0.00952381	0	0.0208333	-0.0512821
0.606856	1.43561	0.773935	-0.15411	-0.0714286	-0.252595	0.288136	-0.203196	0.401042	0.223046	-0.205643	0.0186916	0.0932584	0.148066	2.54118	0.434579	0.35533	0.0307692	-0.318841	-0.0181818	0.487705	0.618421	0.209524	0.147368	-0.03125	0
0.611962	1.40912	0.769925	-0.143836	-0.147959	-0.235294	0.305085	-0.173516	0.265625	0.208895	-0.204389	0.046729	0.0797753	0.176575	2.55588	0.373832	0.375635	0.0307692	-0.23913	-0.0363636	0.483607	0.434211	-0.0190476	0	-0.0208333	-0.222222
0.609774	1.46137	0.834085	-0.116438	-0.163265	-0.262976	0.177966	-0.194064	0.328125	0.206199	-0.314107	0.0747664	0.0820225	0.18895	2.43162	0.406542	0.340102	0.0153846	-0.221014	0.0666667	0.495902	0.328947	0.0190476	0.178947	0.0625	-0.102564
0.636032	1.49227	0.867669	-0.195205	-0.147959	-0.224913	0.313559	-0.16895	0.401042	0.19407	-0.334796	0.0841122	0.047191	0.186077	2.37574	0.359813	0.395939	-0.123077	-0.304348	-0.0666667	0.528689	0.118421	0.161905	0.0842105	-0.0520833	-0.213675
0.652808	1.5504	0.933835	-0.167808	-0.260204	-0.259516	0.211864	-0.180365	0.338542	0.22035	-0.317241	-0.0327103	0.00224719	0.165525	2.39044	0.401869	0.380711	-0.0461538	-0.278986	-0.0545455	0.479508	0.197368	0.12381	-0.0421053	0.0416667	-0.111111
0.679066	1.5298	0.927318	-0.167808	-0.321429	-0.190311	0.20339	-0.200913	0.28125	0.21159	-0.198119	-0.0140187	-0.0269663	0.207514	2.28162	0.462617	0.350254	0	-0.34058	-0.0484848	0.553279	0.236842	0.209524	0.0210526	-0.0104167	-0.17094
0.692925	1.50405	0.921804	-0.191781	-0.306122	-0.110727	0.228814	-0.230594	0.213542	0.228437	-0.187461	0.0607477	-0.0348315	0.158232	2.25882	0.359813	0.416244	-0.0769231	-0.333333	-0.0121212	0.504098	0.447368	0.171429	0.0631579	0.09375	-0.179487
0.708242	1.49448	0.900752	-0.150685	-0.311224	-0.197232	0.330508	-0.267123	0.354167	0.243935	-0.23511	0.046729	-0.119101	0.159116	2.23529	0.425234	0.340102	-0.0769231	-0.355072	-0.0242424	0.487705	0.381579	0.0761905	0.105263	0.114583	-0.034188
0.681255	1.48565	0.877193	-0.136986	-0.255102	-0.207612	0.322034	-0.278539	0.385417	0.224394	-0.264577	-0.0186916	-0.174157	0.0240884	2.25441	0.462617	0.406091	0.0153846	-0.358696	-0.0121212	0.438525	0.197368	0.266667	0.189474	-0.0104167	-0.128205
0.668855	1.46431	0.912782	-0.106164	-0.214286	-0.183391	0.254237	-0.269406	0.333333	0.24124	-0.0557994	-0.00934579	-0.179775	-0.18674	2.17941	0.485981	0.426396	-0.0769231	-0.32971	-0.0181818	0.459016	0.302632	0.152381	0.336842	-0.03125	-0.136752
0.654996	1.41133	0.893734	-0.136986	-0.290816	-0.0519031	0.254237	-0.333333	0.203125	0.266846	0.254545	0.0934579	-0.134831	-0.252376	2.10735	0.285047	0.446701	-0.0307692	-0.278986	-0.030303	0.5	0.157895	0.2	-0.0105263	0	-0.264957
0.654267	1.35835	0.934837	-0.0719178	-0.270408	-0.0657439	0.29661	-0.292237	0.286458	0.212264	0.482759	0.0420561	-0.14382	-0.222762	2.00662	0.345794	0.365482	0	-0.253623	-0.109091	0.446721	0.223684	0.114286	0.126316	0.09375	-0.017094
0.704595	1.29728	0.811529	-0.0719178	-0.22449	-0.0276817	0.245763	-0.289954	0.197917	0.184636	0.60627	-0.0700935	-0.0797753	-0.15116	1.91765	0.345794	0.35533	-0.0923077	-0.286232	-0.115152	0.487705	0.328947	-0.00952381	0.115789	0.125	-0.162393
0.68709	1.27815	0.894236	-0.0445205	-0.260204	-0.0138408	0.186441	-0.294521	0.203125	0.162399	0.794984	0.0841122	-0.105618	-0.143204	1.89632	0.448598	0.472081	0.0307692	-0.188406	0.030303	0.47541	0.0789474	-0.047619	0.157895	0.03125	-0.162393
0.771699	1.2833	0.875188	-0.0205479	-0.265306	0.00692042	0.194915	-0.310502	0.234375	0.132075	0.799373	0	-0.0977528	-0.00154696	1.84044	0.359813	0.406091	-0.107692	-0.231884	-0.10303	0.393443	0.276316	0.142857	-0.0210526	-0.0833333	-0.196581
0.705325	1.26196	0.781955	-0.0719178	-0.326531	-0.0207612	0.186441	-0.294521	0.239583	0.109164	0.841379	-0.0233645	-0.0808989	0.0159116	1.83162	0.280374	0.456853	-0.107692	-0.195652	-0.109091	0.405738	0.421053	0.380952	0.0736842	0.0833333	-0.136752
0.77097	1.26343	0.710276	-0.010274	-0.311224	0.0138408	0.29661	-0.294521	0.307292	0.0768194	0.830094	0	-0.0977528	0.0117127	1.86029	0.186916	0.35533	0.0461538	-0.322464	-0.121212	0.409836	0.328947	0.104762	0.147368	0.03125	-0.0512821
0.829322	1.22369	0.774436	-0.10274	-0.30102	0.0207612	0.220339	-0.262557	0.270833	0.0835579	0.839498	-0.0654206	-0.0460674	0.0101657	1.85515	0.32243	0.360406	-0.0923077	-0.322464	-0.127273	0.446721	0.276316	0.257143	0.273684	-0.03125	-0.0854701
0.840992	1.18175	0.724311	-0.0787671	-0.336735	-0.0380623	0.161017	-0.292237	0.213542	0.0188679	0.80627	-0.0373832	-0.0696629	-0.0435359	1.79926	0.219626	0.304569	-0.0153846	-0.231884	-0.10303	0.418033	0.342105	0.180952	0.157895	-0.0104167	-0.0683761
0.904449	1.16703	0.675689	-0.0410959	-0.316327	-0.0588235	0.101695	-0.27169	0.140625	-0.032345	0.808777	-0.0327103	-0.0213483	-0.0234254	1.79779	0.196262	0.258883	0.0307692	-0.228261	-0.00606061	0.446721	0.328947	0.104762	0.0526316	-0.0625	-0.136752
0.91539	1.17881	0.671679	-0.0787671	-0.372449	-0.0449827	0.211864	-0.237443	0.234375	-0.0357143	0.816928	-0.0140187	-0.0932584	-0.0371271	1.85	0.172897	0.324873	0.0307692	-0.286232	-0.115152	0.405738	0.381579	0.0571429	-0.0210526	0.0833333	-0.0512821
0.860686	1.17586	0.596992	-0.0513699	-0.408163	-0.0207612	0.449153	-0.210046	0.140625	-0.027628	0.697806	-0.0186916	-0.0314607	-0.0245304	1.85735	0.200935	0.345178	-0.0461538	-0.282609	-0.139394	0.377049	0.355263	0.133333	-0.0315789	-0.104167	-0.102564
0.876732	1.12362	0.528822	-0.0650685	-0.403061	-0.0692042	0.211864	-0.178082	0.15625	-0.0734501	0.75674	-0.107477	-0.0134831	-0.0229834	1.83824	0.200935	0.269036	0.0153846	-0.300725	0.0242424	0.364754	0.513158	0.0952381	0.0421053	-0.09375	-0.17094
0.83078	1.0986	0.543358	-0.0616438	-0.423469	-0.0449827	0.313559	-0.194064	0.0989583	-0.0781671	0.714107	-0.088785	0.0808989	-0.0296133	1.85441	0.121495	0.263959	0.0461538	-0.326087	-0.0909091	0.340164	0.407895	0.180952	0.157895	0.0625	-0.145299
0.848286	1.10302	0.506266	-0.0445205	-0.397959	0.0346021	0.20339	-0.16895	0.192708	-0.152965	0.65768	0.0046729	0.0741573	-0.0676243	1.84265	0.0841122	0.233503	-0.0615385	-0.355072	-0.0242424	0.364754	0.197368	0.047619	0.178947	-0.0833333	-0.111111
0.821298	1.09639	0.498246	-0.0547945	-0.443878	-0.0484429	0.322034	-0.196347	0.09375	-0.139488	0.507837	-0.0233645	0.169663	-0.0532597	1.88824	0.172897	0.218274	-0.0461538	-0.347826	-0.0666667	0.319672	0.105263	-0.00952381	0.0105263	-0.145833	-0.17094
0.794311	1.08977	0.482707	-0.0821918	-0.372449	-0.0899654	0.466102	-0.232877	0.0833333	-0.144879	0.436991	-0.0233645	0.27191	-0.0662983	1.84706	0.158879	0.142132	0.0307692	-0.347826	-0.0727273	0.352459	0.223684	0.0571429	0.0842105	-0.0208333	-0.222222
0.811087	1.07873	0.491228	-0.0616438	-0.397959	-0.0588235	0.415254	-0.19863	0.104167	-0.1031	0.358621	-0.0514019	0.380899	-0.0693923	1.86397	0.14486	0.172589	-0.0153846	-0.297101	-0.0545455	0.307377	0.144737	0.238095	0.115789	0.125	-0.136752
0.80744	1.10817	0.45213	-0.0650685	-0.443878	-0.0761246	0.457627	-0.223744	0	-0.0916442	0.324765	-0.0934579	0.416854	-0.111823	1.85441	0.17757	0.182741	0.0153846	-0.391304	-0.0727273	0.327869	0.25	0.0285714	0.0105263	0.0416667	-0.119658
0.752735	1.03458	0.417544	-0.0479452	-0.438776	-0.0865052	0.381356	-0.251142	0.15625	-0.078841	0.308464	-0.046729	0.534831	-0.116464	1.8375	0.0700935	0.192893	0.0615385	-0.282609	-0.139394	0.327869	0.210526	0.00952381	-0.115789	-0.0520833	-0.034188
0.775346	1.01104	0.390977	-0.0205479	-0.428571	-0.103806	0.29661	-0.253425	0.135417	-0.0734501	0.255799	-0.0654206	0.538202	-0.0950276	1.82426	0.257009	0.167513	0.0307692	-0.293478	0	0.336066	0.302632	0.314286	0.0736842	-0.0729167	-0.042735
0.763676	0.978661	0.409524	-0.0308219	-0.443878	-0.128028	0.457627	-0.257991	0.125	-0.0525606	0.236364	-0.0607477	0.585393	-0.0640884	1.75441	0.149533	0.142132	-0.0615385	-0.318841	-0.157576	0.258197	0.131579	0.27619	-0.0210526	0.0208333	-0.128205
0.77097	0.989698	0.477193	0.010274	-0.443878	-0.186851	0.432203	-0.237443	0.161458	-0.0283019	0.274608	-0.0373832	0.532584	-0.041326	1.80735	0.17757	0.106599	-0.0307692	-0.322464	-0.193939	0.262295	0.157895	0.0666667	0.0947368	-0.114583	0.017094
0.766594	0.975717	0.45614	0.0171233	-0.47449	-0.124567	0.559322	-0.246575	0.208333	0.0303234	0.326019	-0.0140187	0.613483	-0.0567956	1.83897	0.088785	0.035533	0	-0.376812	-0.224242	0.229508	0.210526	0.0952381	-0.126316	-0.0104167	-0.0769231
0.706054	0.972774	0.431078	0.0171233	-0.520408	-0.16263	0.330508	-0.22831	0.0625	0.00673854	0.319749	-0.0747664	0.594382	-0.0203315	1.79412	0.168224	0.106599	-0.0615385	-0.333333	-0.139394	0.25	0.0921053	0.32381	-0.0526316	0.125	-0.128205
0.714077	0.970567	0.427569	0	-0.505102	-0.148789	0.254237	-0.305936	0.166667	0.0518868	0.310345	-0.0700935	0.610112	-0.0466298	1.7875	0.0747664	0.0507614	0	-0.271739	-0.0969697	0.262295	0.197368	0.171429	-0.0315789	0.09375	-0.034188
0.673231	0.995585	0.459649	-0.00684932	-0.479592	-0.231834	0.254237	-0.276256	0.119792	0.0215633	0.280251	0.0280374	0.576405	-0.0525967	1.76691	0.0654206	0.00507614	0.0615385	-0.286232	-0.0787879	0.221311	0.105263	0.171429	0.0842105	-0.166667	-0.119658
0.67469	0.986755	0.42807	0.010274	-0.484694	-0.217993	0.305085	-0.335616	0.0260417	0.0525606	0.35674	-0.088785	0.538202	-0.0627624	1.81029	0.0841122	0.0761421	0	-0.253623	-0.133333	0.20082	0.0921053	0.0666667	0.231579	-0.114583	-0.136752
0.701678	0.953642	0.452632	-0.0273973	-0.5	-0.16263	0.364407	-0.230594	0.182292	0.0390836	0.347335	-0.046729	0.51236	-0.0855249	1.73824	0	0.0862944	0.107692	-0.286232	-0.145455	0.192623	0.289474	0.266667	0.0736842	-0.125	-0.111111
0.690007	0.972774	0.504261	-0.0479452	-0.47449	-0.190311	0.279661	-0.191781	0.151042	0.0289757	0.347962	-0.0373832	0.489888	-0.109392	1.72426	0.116822	0.0913706	0.0461538	-0.26087	-0.10303	0.196721	0.157895	0.0952381	0.136842	-0.135417	-0.025641
0.681984	1.00221	0.494236	-0.0616438	-0.515306	-0.242215	0.279661	-0.248858	0.104167	0.000673854	0.339812	-0.107477	0.485393	-0.107624	1.62132	0.0327103	0.071066	0.0307692	-0.318841	-0.127273	0.204918	0.105263	0.12381	0.0736842	-0.0729167	-0.162393
0.649891	1.01104	0.438095	-0.0513699	-0.515306	-0.16955	0.220339	-0.26484	0.109375	0.0343666	0.331034	0.0186916	0.478652	-0.105635	1.65294	-0.00934579	0.0609137	0.107692	-0.300725	-0.169697	0.159836	0.157895	0.228571	0.2	-0.145833	-0.136752
0.654267	0.986755	0.465664	-0.0993151	-0.520408	-0.176471	0.305085	-0.242009	0.145833	-0.00539084	0.371787	-0.0373832	0.446067	-0.146298	1.66471	0.102804	0.0203046	0.0923077	-0.326087	-0.193939	0.163934	0.210526	0.0285714	0.0421053	-0.0520833	-0.111111
0.678337	0.991906	0.460652	-0.0616438	-0.540816	-0.259516	0.20339	-0.267123	0.166667	0.0181941	0.431348	-0.102804	0.421348	-0.144751	1.67132	0.0841122	0.15736	0.0769231	-0.275362	-0.175758	0.17623	0.144737	-0.0380952	0.210526	-0.15625	0.025641
0.675419	0.966887	0.435589	-0.0993151	-0.545918	-0.266436	0.220339	-0.257991	0.0989583	0.0121294	0.44326	-0.121495	0.308989	-0.145856	1.70515	0.0841122	0.0101523	0.0307692	-0.297101	-0.157576	0.151639	0.342105	0.0285714	0.0947368	-0.135417	-0.0598291
0.646973	0.96468	0.44812	-0.0719178	-0.566327	-0.228374	0.245763	-0.246575	0.145833	-0.0148248	0.446395	-0.0700935	0.220225	-0.160442	1.68529	0.0841122	-0.0101523	0.0615385	-0.297101	0	0.131148	0.105263	-0.0190476	0.0947368	-0.0520833	-0.0598291
0.66229	0.950699	0.476692	-0.0547945	-0.52551	-0.269896	0.313559	-0.27169	0.270833	0.0357143	0.462069	-0.046729	0.149438	-0.135691	1.68971	0.0747664	0	-0.0153846	-0.333333	-0.10303	0.106557	0.184211	0	0.0736842	0.25	0
0.641867	0.956586	0.441604	-0.123288	-0.540816	-0.269896	0.177966	-0.244292	0.1875	-0.00269542	0.487147	-0.14486	0.0460674	-0.154917	1.62868	0.0841122	-0.0812183	0.0461538	-0.264493	-0.163636	0.184426	0.0921053	0.161905	0.0210526	-0.104167	-0.00854701
0.633115	0.968359	0.443609	-0.0924658	-0.545918	-0.287197	0.381356	-0.27169	0.135417	0.0303234	0.564263	-0.116822	0.0404494	-0.142762	1.70515	0.130841	0.0101523	0.0769231	-0.286232	-0.181818	0.135246	0.184211	0.161905	0.168421	0.0208333	-0.145299
0.632385	0.95585	0.37995	-0.0616438	-0.530612	-0.276817	0.279661	-0.312785	0.317708	-0.00808625	0.495925	-0.0934579	-0.0179775	-0.176796	1.56985	0.088785	-0.0913706	0.0307692	-0.210145	-0.206061	0.17623	0.131579	0.047619	0.0421053	-0.0520833	0.111111
0.644785	1.0677	0.382957	-0.10274	-0.520408	-0.256055	0.211864	-0.30137	0.171875	-0.0262803	0.542947	-0.0420561	0.0168539	-0.151823	1.61471	0.107477	-0.172589	0.0153846	-0.213768	-0.157576	0.17623	0.0657895	0.104762	-0.178947	-0.0520833	-0.0512821
0.656455	0.995585	0.340351	-0.0821918	-0.510204	-0.221453	0.186441	-0.335616	0.15625	-0.0161725	0.489655	-0.0747664	0.0258427	-0.18453	1.53162	0.0981308	-0.0507614	-0.0153846	-0.199275	-0.0969697	0.22541	0.157895	0.161905	0.0210526	-0.125	-0.0512821
0.641867	0.966152	0.34787	-0.106164	-0.545918	-0.283737	0.347458	-0.289954	0.0989583	-0.0438005	0.487147	-0.0654206	0.0011236	-0.180773	1.53971	0.0794393	-0.137056	0.0153846	-0.15942	-0.133333	0.254098	0.118421	0.228571	-0.115789	0	-0.0683761
0.637491	0.941869	0.317293	-0.0650685	-0.535714	-0.287197	0.279661	-0.319635	0.1875	-0.0296496	0.49906	-0.0934579	0.0101124	-0.188729	1.57941	0.0747664	-0.121827	0.0615385	-0.242754	-0.218182	0.286885	0.0263158	-0.0571429	-0.136842	-0.166667	-0.128205
0.635303	0.916115	0.334837	-0.0993151	-0.5	-0.262976	0.245763	-0.324201	0.078125	-0.032345	0.524765	-0.0794393	0.0101124	-0.211934	1.62941	0.126168	-0.137056	0.153846	-0.177536	-0.187879	0.315574	0.144737	0.0571429	-0.0526316	-0.114583	-0.136752
0.623632	0.908756	0.368421	-0.0856164	-0.505102	-0.273356	0.228814	-0.267123	0.109375	-0.0202156	0.539185	-0.0654206	0.0258427	-0.20663	1.57941	0.0607477	-0.0558376	0.0153846	-0.152174	-0.133333	0.340164	0.0263158	0.0571429	0.0631579	-0.0625	-0.00854701
0.639679	0.915379	0.322807	-0.0890411	-0.515306	-0.287197	0.135593	-0.324201	0.21875	-0.0491914	0.497806	-0.0373832	0.0921348	-0.215028	1.54853	0.21028	-0.142132	-0.0307692	-0.23913	-0.145455	0.467213	0.25	0.0761905	0.0421053	-0.125	0.017094
0.595915	0.903606	0.324311	-0.0787671	-0.494898	-0.301038	0.194915	-0.299087	0.213542	-0.00336927	0.566771	-0.168224	0.111236	-0.194696	1.50147	0.0373832	-0.101523	0.0615385	-0.173913	-0.181818	0.540984	0.0789474	0.0285714	0.0526316	-0.145833	-0.102564
0.643326	0.888153	0.303258	-0.0856164	-0.520408	-0.318339	0.220339	-0.344749	0.21875	-0.0357143	0.505956	-0.116822	0.230337	-0.206851	1.55441	0.0607477	-0.0761421	-0.0153846	-0.0688406	-0.230303	0.622951	0.0394737	-0.00952381	0.0421053	-0.09375	0.017094
0.679066	0.900662	0.286216	-0.0890411	-0.530612	-0.231834	0.194915	-0.319635	0.182292	-0.0673854	0.52163	-0.0420561	0.268539	-0.213481	1.55294	0.0514019	-0.0406091	-0.0461538	-0.166667	-0.175758	0.622951	0.197368	0	-0.0736842	-0.0625	-0.042735
0.727936	0.917586	0.334336	-0.106164	-0.5	-0.304498	0.152542	-0.312785	0.203125	-0.0559299	0.497806	-0.0747664	0.257303	-0.215028	1.4875	0.224299	-0.0913706	0.0307692	-0.0833333	-0.121212	0.668033	0.0526316	0.0857143	-0.0947368	-0.0833333	-0.017094
0.707513	0.891096	0.377945	-0.0787671	-0.494898	-0.294118	0.118644	-0.349315	0.260417	-0.0491914	0.448903	-0.107477	0.191011	-0.232044	1.46691	0.102804	-0.0203046	0.0615385	-0.184783	-0.133333	0.680328	0.131579	-0.0380952	-0.0631579	-0.104167	0.0854701
0.723559	0.846946	0.357393	-0.10274	-0.469388	-0.269896	0.101695	-0.321918	0.265625	-0.0384097	0.47837	-0.0046729	0.178652	-0.234696	1.50294	0.0420561	-0.121827	-0.0153846	-0.163043	-0.248485	0.692623	0.223684	0.161905	-0.178947	-0.0416667	-0.0769231
0.801605	0.825607	0.388972	-0.0958904	-0.52551	-0.269896	0.432203	-0.333333	0.234375	-0.0438005	0.447022	0.0373832	0.168539	-0.270718	1.40882	-0.0046729	-0.0964467	0	-0.155797	-0.163636	0.651639	0.157895	0.190476	0.0421053	-0.125	-0.025641
0.812546	0.80574	0.388471	-0.150685	-0.52551	-0.249135	0.20339	-0.342466	0.177083	-0.0896226	0.44326	-0.107477	0.180899	-0.253702	1.39412	0.154206	0.0152284	-0.0769231	-0.101449	-0.127273	0.688525	0	0.152381	-0.0842105	-0.0104167	-0.102564
0.859956	0.796174	0.380451	-0.178082	-0.515306	-0.249135	0.262712	-0.273973	0.203125	-0.069407	0.413166	-0.0233645	0.158427	-0.266298	1.36397	0.116822	-0.101523	0	-0.0869565	-0.0909091	0.643443	0.276316	0.285714	0.105263	-0.0625	-0.128205
0.835886	0.765269	0.3599	-0.130137	-0.494898	-0.273356	0.228814	-0.353881	0.302083	-0.0855795	0.395611	-0.121495	0.152809	-0.280884	1.40809	0.168224	-0.0659898	0.0461538	-0.144928	-0.139394	0.651639	0.105263	0.0571429	-0.0315789	-0.114583	0.025641
0.814734	0.752024	0.337845	-0.143836	-0.44898	-0.318339	0.20339	-0.326484	0.276042	-0.0667116	0.455799	-0.116822	0.111236	-0.247735	1.35294	0.0747664	-0.147208	0.0307692	-0.144928	-0.0909091	0.581967	0.0921053	0.114286	0	-0.03125	-0.0769231
0.79577	0.74025	0.373935	-0.181507	-0.454082	-0.318339	0.228814	-0.363014	0.177083	-0.0687332	0.383699	-0.0607477	0.088764	-0.248398	1.34338	0.116822	-0.0659898	0	-0.144928	-0.133333	0.651639	0.105263	0.161905	0.0736842	0.145833	-0.0940171
0.730853	0.710081	0.353383	-0.219178	-0.443878	-0.283737	0.279661	-0.347032	0.114583	-0.0822102	0.413793	-0.0280374	0.117978	-0.239337	1.31324	0.046729	-0.0152284	0.0307692	-0.130435	-0.0363636	0.602459	0.25	0.219048	-0.0842105	-0.03125	-0.0512821
0.676878	0.721854	0.353383	-0.253425	-0.403061	-0.276817	0.144068	-0.378995	0.104167	-0.0929919	0.42069	-0.0327103	0.0764045	-0.251492	1.3	0.149533	-0.0406091	0.0461538	-0.195652	-0.0909091	0.610656	0.131579	0.266667	0.0631579	0.0208333	-0.0940171
0.622174	0.727005	0.413033	-0.243151	-0.423469	-0.256055	0.169492	-0.340183	0.192708	-0.107817	0.382445	-0.0934579	0.041573	-0.23779	1.3375	-0.00934579	-0.0862944	0.0307692	-0.141304	-0.115152	0.598361	0.315789	-0.00952381	0.0421053	-0.0729167	-0.145299
0.609044	0.719647	0.354386	-0.294521	-0.382653	-0.211073	0.322034	-0.365297	0.0833333	-0.101752	0.460188	-0.0700935	0.0651685	-0.247072	1.26029	0.0046729	0.243655	0.107692	-0.0507246	-0.121212	0.57377	0.105263	0.228571	0.0105263	-0.0833333	-0.111111
0.606127	0.710081	0.394987	-0.25	-0.336735	-0.197232	0.186441	-0.36758	0.109375	-0.0855795	0.384953	-0.088785	0.0382022	-0.256575	1.29926	-0.00934579	0.0862944	0.169231	-0.119565	-0.109091	0.618852	0.513158	0.495238	-0.0736842	-0.135417	-0.0512821
0.577681	0.693157	0.405013	-0.277397	-0.306122	-0.200692	0.322034	-0.383562	0.161458	-0.0842318	0.434483	-0.14486	-0.011236	-0.249503	1.31985	-0.0280374	0.177665	0.246154	-0.134058	-0.109091	0.622951	0.210526	0.485714	0.0526316	0	0
0.571116	0.660044	0.326316	-0.321918	-0.280612	-0.16263	0.186441	-0.342466	0.161458	-0.106469	0.429467	-0.0373832	-0.0213483	-0.271381	1.23162	-0.0700935	0.192893	0.184615	-0.184783	-0.0363636	0.618852	0.157895	0.580952	0.126316	-0.104167	0
0.525894	0.663723	0.370426	-0.325342	-0.244898	-0.245675	0.186441	-0.324201	0.015625	-0.113208	0.437618	-0.11215	-0.0640449	-0.281105	1.25735	0.0046729	0.106599	0.261538	-0.213768	-0.0242424	0.692623	0.0789474	0.666667	0.0842105	0.0833333	-0.0769231
0.503282	0.668138	0.675188	-0.349315	-0.229592	-0.249135	0.118644	-0.347032	0.197917	-0.0781671	0.437618	-0.107477	-0.0483146	-0.291492	1.25	-0.0327103	0.0964467	0.292308	-0.0253623	-0.030303	0.704918	0.302632	0.780952	0.168421	0.0625	-0.00854701
0.452954	0.663723	0.37995	-0.328767	-0.234694	-0.252595	0.254237	-0.344749	0.208333	-0.041779	0.495925	-0.214953	-0.133708	-0.27558	1.26397	-0.0373832	0.192893	0.4	-0.181159	0.0424242	0.737705	0.460526	0.695238	0.0736842	0.177083	0.017094
0.490153	0.643856	0.501754	-0.30137	-0.153061	-0.204152	0.135593	-0.342466	0.255208	-0.0572776	0.658307	-0.126168	-0.175281	-0.261436	1.22721	-0.0607477	0.035533	0.338462	-0.148551	0.0181818	0.696721	0.263158	0.666667	0.0736842	0.114583	0.17094
0.449307	0.633554	0.581955	-0.215753	-0.137755	-0.16609	0.288136	-0.406393	0.25	-0.0505391	0.629467	-0.102804	-0.204494	-0.174807	1.26618	0.130841	0.218274	0.461538	-0.166667	-0.00606061	0.745902	0.289474	0.657143	0.0631579	0.03125	0.196581
0.462436	0.635762	0.667168	-0.178082	-0.117347	0.0242215	0.313559	-0.358447	0.390625	-0.0330189	0.855799	-0.0327103	-0.186517	-0.00662983	1.14779	0.0981308	0.213198	0.753846	-0.0869565	-0.0666667	0.77459	0.671053	0.695238	0.0421053	0.28125	0.282051
0.517141	0.63429	0.743358	-0.0821918	-0.0714286	0.252595	0.423729	-0.349315	0.510417	0.0154987	0.994357	-0.107477	-0.189888	0.101436	1.15956	0.275701	0.192893	1	0.0217391	0.242424	0.803279	1.19737	0.666667	0.0526316	0.166667	0.384615
0.625821	0.65195	0.788972	0.0616438	0.0918367	0.352941	0.542373	-0.372146	0.442708	0.111186	1.28339	0	-0.179775	0.143204	1.11838	0.556075	0.324873	1.43077	0.257246	0.381818	1.0082	1.5	0.561905	0.210526	0.197917	0.641026
0.522976	0.682119	0.803509	0.157534	0.132653	0.525952	0.508475	-0.344749	0.6875	0.123989	1.46834	0.0981308	-0.0865169	0.212818	0.952941	0.897196	0.269036	1.83077	0.514493	0.709091	0.487705	1.86842	0.419048	0.105263	0.239583	0.91453
1.10576	0.963208	0.695739	0.455479	-0.0306122	0.588235	0.983051	-0.230594	0.71875	0.210916	1.26019	0.373832	0.0337079	0.283536	1.36691	1.35981	0.243655	0.907692	0.684783	0.733333	1.27869	2.10526	0.485714	0.547368	0	0.316239
1.26185	1.05519	0.831078	0.667808	0.147959	0.885813	0.881356	-0.173516	1.03646	0.351752	1.77618	0.602804	0.255056	0.590939	1.71985	2.12617	0.634518	1.15385	1.21739	1.47273	1.57377	3.11842	0.409524	0.968421	0.135417	0.529915
1.29832	1.10596	0.890226	0.886986	0.280612	0.989619	0.949153	-0.107306	1.32292	0.458895	2.04326	0.934579	0.396629	0.807514	1.96471	2.6729	0.695431	1.43077	1.53261	1.84242	1.67623	3.44737	0.380952	1.32632	0.125	0.666667
1.36761	1.20309	0.981955	1.05822	0.382653	1.2526	1.04237	-0.114155	1.43229	0.524259	2.23009	1.25701	0.526966	0.948287	2.00735	2.92056	0.771574	1.6	1.99275	2.41212	1.71721	3.75	0.333333	1.05263	0.1875	0.675214
1.39096	1.24724	0.936341	1.14041	0.459184	1.2526	1.4322	-0.0547945	1.58854	0.563342	2.12288	1.68224	0.635955	0.947845	2.05956	3.16355	0.791878	1.69231	2.22101	2.53333	1.66803	4.07895	0.52381	1.37895	0.1875	0.897436
1.34209	1.27815	0.936341	1.24315	0.515306	1.28374	1.57627	-0.00456621	1.67188	0.593666	2.07398	1.78972	0.650562	0.991823	1.94779	3.18692	0.873096	1.72308	2.4529	2.90303	1.57787	4.52632	0.447619	1.53684	0.208333	0.888889
1.39752	1.27373	0.940351	1.34247	0.515306	1.26298	1.58475	0.0182648	1.75521	0.577493	1.87962	2.04206	0.64382	0.946961	1.8875	3.29907	0.675127	1.8	2.77899	3.20606	1.55328	4.46053	0.352381	1.65263	0.135417	1.05128
1.36251	1.29654	0.927318	1.37671	0.55102	1.38062	1.66102	0.0547945	1.79167	0.532345	1.84514	2.1028	0.573034	0.897901	2.00588	3.2243	0.695431	1.8	2.6413	3.42424	1.60246	4.51316	0.257143	1.16842	0.125	0.811966
1.25602	1.29433	0.907268	1.41096	0.55102	1.31142	1.74576	0.0890411	1.96354	0.531671	1.80439	2.05607	0.650562	0.844862	2.02132	3.1215	0.715736	1.98462	2.65217	3.58788	1.54918	4.22368	0.361905	1.27368	0.0833333	0.837607
1.2903	1.29507	0.754386	1.40411	0.540816	1.38062	1.83898	0.139269	1.76042	0.521563	1.81379	2.1215	0.597753	0.659447	1.99779	2.98131	0.57868	1.83077	2.62319	3.72727	1.5	4.19737	0.371429	1.41053	0.0833333	0.923077
1.22611	1.31862	0.73584	1.38014	0.479592	1.31834	1.63559	0.221461	1.75521	0.549191	1.89843	1.97196	0.566292	0.554254	1.99044	2.96729	0.472081	1.90769	2.54348	3.83636	1.41803	4.38158	0.180952	1.38947	0.177083	0.974359
1.18964	1.34216	0.717794	1.38699	0.540816	1.31834	1.61017	0.109589	1.79688	0.497305	1.92351	2.03271	0.551685	0.457017	1.92794	2.94393	0.527919	1.84615	2.69203	3.78788	1.42623	3.76316	0.180952	0.768421	0.28125	0.957265
1.19329	1.37233	0.699749	1.35616	0.484694	1.28374	1.78814	0.136986	1.63542	0.46496	2.00502	1.8785	0.602247	0.403094	1.94191	2.96729	0.624366	1.83077	2.60507	3.86667	1.44262	3.98684	0.247619	0.957895	0.21875	0.863248
1.17578	1.37675	0.715288	1.30822	0.44898	1.22145	1.84746	0.0981735	1.59375	0.464286	2.01129	1.84579	0.513483	0.327956	1.95	2.84579	0.406091	1.86154	2.63768	3.58788	1.37705	3.76316	0.2	1.15789	0.0416667	0.863248
1.16995	1.3245	0.651128	1.2089	0.484694	1.34602	1.70339	0.166667	1.53646	0.440027	1.91348	1.79907	0.470787	0.289061	1.89338	2.51869	0.573604	1.8	2.36957	3.4303	1.33197	3.44737	0.333333	0.873684	0.145833	1.13675
1.1612	1.32745	0.700251	1.15753	0.47449	1.20069	1.88983	0.184932	1.53125	0.462264	1.92665	2.01402	0.430337	0.219448	1.88676	2.6028	0.609137	1.83077	2.2029	3.32727	1.35246	3.53947	0.142857	0.642105	0.208333	1.44444
1.124	1.34805	0.629574	1.07877	0.489796	1.11765	1.78814	0.296804	1.49479	0.407682	1.87273	1.69626	0.401124	0.176354	1.81912	2.26636	0.517766	1.73846	2.25725	3.46061	1.2582	3.40789	0.180952	0.4	0.135417	1.50427
1.12254	1.3245	0.662155	1.06507	0.428571	1.09689	1.65254	0.155251	1.59896	0.403639	2.02759	1.54673	0.368539	0.177901	1.74706	2.30374	0.543147	1.70769	2.1087	3.14545	1.25	3.43421	0.12381	0.494737	0.0520833	1.33333
1.13129	1.30611	0.632581	0.989726	0.428571	1.13149	1.45763	0.155251	1.54167	0.395553	1.96113	1.64953	0.374157	0.159779	1.67868	2.31308	0.64467	1.64615	2.08333	3.18182	1.2459	3.06579	0.142857	0.947368	0.0833333	1.29915
1.13786	1.29286	0.647118	0.931507	0.357143	1.0692	1.75424	0.203196	1.39583	0.410377	1.83699	1.41589	0.365169	0.171271	1.69485	2.19159	0.461929	1.61538	2	3.09697	1.18852	2.82895	0.219048	0.547368	0.135417	1.38462
1.13202	1.25313	0.635589	0.886986	0.438776	1.06228	1.5678	0.0570776	1.41667	0.330863	1.79373	1.44393	0.294382	0.157348	1.58235	2.08878	0.451777	1.55385	1.82609	2.76364	1.13934	2.65789	0.219048	0.536842	0.0416667	1.31624
1.14807	1.18911	0.61203	0.85274	0.418367	1.13495	1.57627	0.0844749	1.26042	0.356469	1.85204	1.28505	0.244944	0.103867	1.49559	2.0514	0.416244	1.38462	1.9529	2.72121	1.08607	2.59211	0.2	0.547368	0.15625	1.31624
1.20496	1.10228	0.521303	0.85274	0.44898	0.878893	1.61864	0.0684932	1.23438	0.322776	1.8721	1.23832	0.226966	0.114917	1.52794	1.93458	0.340102	1.43077	1.75725	2.39394	1.07377	2.68421	0.266667	0.505263	0.09375	1.37607
1.20788	0.974982	0.590476	0.821918	0.352041	0.951557	1.49153	0.0273973	1.23958	0.325472	1.82821	1.28505	0.18427	0.100773	1.49485	1.86449	0.441624	1.4	1.64855	2.54545	1.10656	2.48684	0.266667	0.526316	0.125	1.10256
1.16338	0.891832	0.502256	0.767123	0.392857	0.847751	1.32203	0.0456621	1.15625	0.247305	1.81944	1.07944	0.139326	0.0857459	1.44632	1.84579	0.456853	1.23077	1.42754	2.50909	1.11066	2.40789	0.133333	0.442105	0.197917	1.10256
1.08972	0.790287	0.480702	0.767123	0.413265	0.885813	1.41525	-0.0136986	1.08854	0.295822	1.77241	1.08411	0.122472	0.0722652	1.43162	1.78972	0.527919	1.16923	1.24638	2.15152	1.12705	2.59211	0.266667	0.326316	0.03125	1.25641
1.0248	0.681383	0.526817	0.708904	0.413265	0.792388	1.5339	-0.0159817	1.01562	0.289084	1.70157	1.13084	0.0325843	0.0532597	1.40074	1.7243	0.375635	1.13846	1.2971	2.10909	1.06148	1.89474	0.209524	0.378947	0.395833	1.05128
0.994165	0.606328	0.459649	0.64726	0.372449	0.695502	1.48305	-0.0570776	0.947917	0.216307	1.58997	1.16822	0.0438202	0.0618785	1.3375	1.68224	0.375635	0.969231	1.13406	1.99394	1.07377	2	0.209524	0.515789	-0.0520833	1.05128
0.86798	0.55482	0.475689	0.671233	0.423469	0.640138	1.45763	-0.06621	1	0.215633	1.65956	1.03271	-0.0011236	0.0470718	1.26324	1.85047	0.294416	1.01538	1.22464	1.98788	1.04508	1.72368	0.0761905	0.484211	0	0.982906
0.799416	0.509934	0.426566	0.592466	0.408163	0.650519	1.31356	0.0228311	0.822917	0.234501	1.66959	1.11682	-0.0404494	0.0183425	1.30882	1.73832	0.319797	0.876923	1.21014	1.84242	1.02459	1.84211	0.161905	0.684211	0.0833333	0.820513
0.717724	0.4805	0.445614	0.506849	0.408163	0.705882	1.66102	-0.0684932	0.942708	0.192049	1.68652	0.953271	-0.0606742	0.00309392	1.31618	1.74299	0.28934	0.8	1.11594	1.71515	1.06557	1.64474	0.133333	0.473684	0.0833333	0.91453
0.63895	0.465048	0.427068	0.482877	0.469388	0.525952	1.64407	-0.100457	0.65625	0.208221	1.6069	1.14019	-0.0865169	0.00154696	1.29632	1.68224	0.274112	0.815385	1.11957	1.59394	1.04098	1.64474	0.0380952	0.6	0.135417	0.760684
0.657185	0.447388	0.426566	0.472603	0.362245	0.640138	1.37288	-0.105023	0.864583	0.165768	1.65893	1.10748	-0.094382	-0.00287293	1.33824	1.51869	0.314721	0.8	1.07246	1.52727	0.983607	1.63158	0.0666667	0.736842	0.125	0.769231
0.655726	0.433407	0.422556	0.417808	0.311224	0.577855	1.64407	-0.0821918	0.817708	0.202156	1.54671	1.06075	-0.0910112	-0.00287293	1.4	1.56075	0.360406	0.676923	1.11232	1.49697	0.979508	1.18421	0.152381	0.589474	0.145833	0.65812
0.632385	0.421634	0.375439	0.414384	0.341837	0.484429	1.55932	-0.107306	0.765625	0.175876	1.54483	0.915888	-0.117978	-0.0125967	1.36985	1.35514	0.228426	0.538462	0.978261	1.32727	0.954918	1.48684	0.0190476	0.326316	-0.0208333	0.598291
0.646244	0.404709	0.418546	0.465753	0.372449	0.477509	1.64407	-0.0753425	0.708333	0.167116	1.53793	0.845794	-0.0617978	-0.0187845	1.35221	1.28505	0.19797	0.553846	0.927536	1.30303	0.991803	1.40789	0.238095	0.347368	-0.0625	0.615385
0.628738	0.3922	0.401002	0.400685	0.408163	0.432526	1.5339	-0.123288	0.671875	0.190027	1.45643	0.836449	-0.0629213	-0.0256354	1.33897	1.31308	0.253807	0.476923	0.815217	1.31515	0.942623	1.27632	0.161905	0.421053	0.125	0.478632
0.68709	0.381163	0.393985	0.35274	0.433673	0.397924	1.61017	-0.159817	0.651042	0.148922	1.55799	0.78972	-0.0786517	-0.0358011	1.31397	1.23364	0.238579	0.476923	0.735507	1.13939	0.946721	1.26316	0.171429	0.315789	0.0729167	0.529915
0.647702	0.37454	0.38396	0.380137	0.479592	0.366782	1.59322	-0.0936073	0.739583	0.179919	1.48276	0.691589	-0.047191	-0.0123757	1.34706	1.16822	0.22335	0.415385	0.695652	1.18788	0.864754	1.14474	0.257143	0.221053	0	0.57265
0.639679	0.362031	0.390476	0.428082	0.44898	0.311419	1.61017	-0.152968	0.5625	0.204852	1.46144	0.523364	-0.0977528	-0.0446409	1.33015	1.06542	0.137056	0.338462	0.644928	1.05455	0.868852	0.986842	0.342857	0.242105	-0.0625	0.589744
0.644785	0.372333	0.40802	0.380137	0.403061	0.3391	1.4322	-0.0913242	0.703125	0.183288	1.31411	0.64486	-0.0516854	-0.0773481	1.4	1.14019	0.269036	0.353846	0.626812	1.04848	0.831967	1.26316	0.0952381	0.652632	0.104167	0.384615
0.610503	0.367918	0.378947	0.318493	0.408163	0.287197	1.63559	-0.0890411	0.630208	0.140836	1.21818	0.602804	-0.0483146	-0.079558	1.32574	1.03738	0.172589	0.292308	0.525362	0.90303	0.913934	0.881579	0.104762	0.336842	-0.0104167	0.666667
0.61488	0.357616	0.392481	0.342466	0.352041	0.249135	1.4661	-0.10274	0.75	0.0956873	1.13668	0.588785	-0.0191011	-0.100773	1.24706	1.00935	0.142132	0.276923	0.615942	0.993939	0.901639	0.842105	0.247619	0.284211	0.0104167	0.478632
0.60248	0.331862	0.421053	0.332192	0.316327	0.242215	1.27966	-0.150685	0.671875	0.128032	1.17931	0.588785	-0.00561798	-0.116464	1.22426	0.948598	0.126904	0.215385	0.688406	0.939394	0.922131	0.868421	-0.047619	0.157895	0.0729167	0.512821
0.584974	0.340692	0.414536	0.349315	0.392857	0.207612	1.33898	-0.13242	0.526042	0.110512	1.20125	0.584112	0.00674157	-0.128398	1.18235	0.813084	0.071066	0.169231	0.532609	0.921212	0.889344	0.960526	0.0952381	0.221053	-0.114583	0.512821
0.57841	0.319352	0.383459	0.332192	0.331633	0.179931	1.28814	-0.114155	0.546875	0.1469	1.10094	0.602804	-0.0146067	-0.141215	1.33015	0.869159	0.243655	0.138462	0.594203	0.854545	0.844262	0.960526	0.0761905	0.210526	0	0.547009
0.595915	0.3039	0.644612	0.277397	0.352041	0.16263	1.25424	-0.0981735	0.651042	0.157682	1.14859	0.551402	-0.0370787	-0.147403	1.32059	0.813084	0.177665	0.123077	0.434783	0.848485	0.856557	0.973684	0.0952381	0.410526	0.0520833	0.504274
0.565281	0.294334	0.383459	0.273973	0.326531	0.103806	1.26271	-0.0730594	0.6875	0.119272	1.07586	0.509346	0.0224719	-0.151602	1.29853	0.883178	0.208122	0.123077	0.423913	0.824242	0.844262	0.618421	-0.0285714	0.221053	0.09375	0.435897
0.560175	0.272995	0.346867	0.226027	0.362245	0.114187	1.27966	-0.0616438	0.671875	0.121968	1.10408	0.5	0.0393258	-0.176354	1.23824	0.808411	0.177665	0.0923077	0.5	1.01212	0.819672	0.75	0.0761905	0.326316	0	0.461538
0.555799	0.251656	0.381955	0.226027	0.295918	0.0968858	1.21186	-0.157534	0.625	0.126011	1.07524	0.537383	-0.0247191	-0.159558	1.23015	0.869159	0.228426	0.0769231	0.572464	0.945455	0.79918	0.763158	0.00952381	0.284211	0.104167	0.376068
0.557257	0.24209	0.351378	0.222603	0.326531	0.0761246	1.10169	-0.0890411	0.651042	0.0781671	1.05768	0.523364	0	-0.172376	1.21838	0.82243	0.192893	0.0307692	0.442029	0.860606	0.786885	0.592105	0.0285714	0.0736842	-0.0208333	0.25641
0.536834	0.219279	0.369424	0.14726	0.316327	0.0588235	1.25424	-0.0890411	0.666667	0.0889488	1.03135	0.495327	-0.0337079	-0.167293	1.14191	1.00467	0.121827	0.0923077	0.387681	0.8	0.803279	0.723684	0	0.0842105	-0.0729167	0.470085
0.606856	0.203091	0.312281	0.136986	0.306122	0.0207612	1.15254	-0.125571	0.5	0.0606469	0.972414	0.373832	-0.052809	-0.175912	1.13824	0.817757	0.0507614	0.0769231	0.485507	0.830303	0.79918	0.842105	-0.0857143	0.157895	-0.0729167	0.333333
0.600292	0.191317	0.34787	0.126712	0.336735	0.0138408	1.28814	-0.146119	0.541667	0.041779	1.0069	0.38785	-0.0179775	-0.179227	1.13529	0.845794	0.111675	0.0307692	0.384058	0.793939	0.782787	0.815789	0	0.221053	0.03125	0.299145
0.641138	0.166299	0.309273	0.0821918	0.331633	0.00346021	1.17797	-0.210046	0.510417	0.0815364	0.968025	0.598131	-0.0348315	-0.150276	1.14412	0.85514	0.106599	0.153846	0.268116	0.806061	0.77459	0.842105	0	0.231579	0.0625	0.299145
0.629468	0.14128	0.300251	0.133562	0.270408	0	1.21186	-0.136986	0.442708	0.0579515	0.987461	0.425234	0.0157303	-0.12221	1.15294	0.808411	0.035533	0.0307692	0.257246	0.781818	0.717213	0.842105	0.0571429	0.178947	-0.166667	0.0854701
0.684172	0.117734	0.33985	0.116438	0.321429	0.0242215	1.11017	-0.159817	0.541667	0.0687332	1.0163	0.425234	-0.0370787	-0.0928177	1.18603	0.799065	0.111675	0.0769231	0.326087	0.860606	0.770492	0.526316	-0.0857143	0.126316	0.0625	0.34188
0.666667	0.0919794	0.313283	0.0890411	0.27551	0.0588235	1.16102	-0.164384	0.609375	0.0586253	0.937304	0.38785	-0.0247191	-0.0616575	1.12721	0.724299	0.101523	-0.0615385	0.384058	0.709091	0.70082	0.526316	-0.0190476	0.347368	-0.0833333	0.222222
0.653538	0.0905077	0.336341	0.106164	0.316327	-0.0311419	1.10169	-0.221461	0.458333	0.0532345	0.966144	0.378505	-0.0595506	-0.0590055	1.20294	0.691589	0.152284	0.123077	0.257246	0.69697	0.713115	0.710526	0.0380952	0.263158	0.135417	0.213675
0.666667	0.066961	0.344361	0.0924658	0.357143	-0.0449827	1.34746	-0.166667	0.473958	0.0579515	1.0489	0.471963	-0.0258427	-0.0353591	1.16985	0.672897	0.0609137	0.0307692	0.362319	0.709091	0.680328	0.394737	0.047619	0.0631579	0.0625	0.333333
0.649161	0.0515085	0.321303	0.0993151	0.341837	0	1.14407	-0.16895	0.604167	0.0336927	0.980564	0.434579	-0.0393258	-0.0556906	1.26912	0.672897	0.0761421	0.0307692	0.315217	0.630303	0.737705	0.578947	-0.0380952	0.168421	-0.0416667	0.0683761
0.636032	0.0264901	0.320301	0.0890411	0.331633	-0.0726644	1.01695	-0.173516	0.385417	0.0680593	1.01003	0.261682	-0.0707865	-0.0521547	1.28456	0.663551	-0.00507614	0.0153846	0.15942	0.672727	0.639344	0.394737	-0.0190476	0.0526316	0.145833	0.111111
0.645514	0.0213392	0.316291	0.0582192	0.392857	-0.0865052	1.20339	-0.200913	0.338542	0.0181941	0.90094	0.364486	-0.103371	-0.0287293	1.25147	0.654206	0.0406091	0.0923077	0.188406	0.666667	0.684426	0.447368	-0.0952381	0.0526316	-0.145833	0.188034
0.594457	0.00662252	0.34787	0.136986	0.387755	-0.0934256	1.22881	-0.207763	0.270833	0.0195418	0.885893	0.299065	-0.124719	-0.0216575	1.18603	0.654206	0.0152284	-0.0461538	0.231884	0.660606	0.70082	0.578947	0.0952381	0.168421	0	0.162393
0.555799	-0.00220751	0.342857	0.164384	0.346939	-0.0138408	1.12712	-0.159817	0.411458	0.0438005	0.910345	0.331776	-0.146067	0.0298343	1.27574	0.700935	0.0964467	-0.0461538	0.192029	0.715151	0.696721	0.315789	0.00952381	0.0315789	0.0520833	0.111111
0.570387	-0.00588668	0.340351	0.15411	0.357143	-0.0207612	1.09322	-0.159817	0.317708	0.0141509	0.810658	0.219626	-0.166292	0.0596685	1.23456	0.705607	0.0609137	-0.0461538	0.224638	0.557576	0.647541	0.434211	-0.00952381	0.0315789	-0.0729167	0.0940171
0.603939	-0.0264901	0.350877	0.140411	0.306122	-0.124567	1.09322	-0.219178	0.296875	-0.00808625	0.859561	0.228972	-0.152809	0.0349171	1.20441	0.635514	-0.0203046	0.0769231	0.300725	0.624242	0.622951	0.513158	-0.0285714	0.0315789	-0.0104167	0.213675
0.570387	-0.0323767	0.341855	0.140411	0.336735	-0.107266	1.17797	-0.182648	0.333333	-0.037062	0.926646	0.168224	-0.180899	0.0687293	1.23897	0.728972	0.0659898	0.153846	0.17029	0.460606	0.659836	0.328947	0.0190476	0.147368	-0.0104167	0.034188
0.573304	-0.0463576	0.352882	0.0856164	0.352041	-0.0692042	1.0678	-0.155251	0.296875	-0.0518868	0.895925	0.158879	-0.148315	0.101215	1.22206	0.649533	0.142132	0.0307692	0.23913	0.606061	0.668033	0.644737	0.0857143	0.4	-0.15625	0.017094
0.611962	-0.0522443	0.327318	0.0958904	0.316327	-0.117647	1.22034	-0.237443	0.317708	-0.0721024	0.86395	0.224299	-0.11573	0.0906077	1.15074	0.61215	0.0152284	-0.0615385	0.141304	0.557576	0.618852	0.276316	0	0.273684	-0.0625	0.034188
0.582057	-0.0676968	0.340351	0.106164	0.341837	-0.134948	1.27966	-0.180365	0.244792	-0.0613208	0.897806	0.200935	-0.104494	0.0176796	1.10882	0.579439	0.035533	0.0307692	0.217391	0.581818	0.655738	0.394737	0.0857143	0.115789	-0.114583	0.196581
0.576222	-0.0647535	0.384461	0.113014	0.352041	0.00692042	1.25424	-0.27169	0.28125	-0.0673854	0.850784	0.17757	-0.123596	0.0101657	1.11471	0.570093	0.0761421	0.0307692	0.184783	0.490909	0.647541	0.342105	-0.0190476	0.231579	-0.0833333	0.17094
0.526623	-0.0676968	0.329825	0.0993151	0.372449	-0.0934256	1.15254	-0.216895	0.151042	-0.0734501	0.8	0.126168	-0.0988764	-0.0110497	0.995588	0.565421	0.0203046	0.0461538	0.0942029	0.521212	0.622951	0.302632	-0.104762	0.168421	0.0104167	0.188034
0.523705	-0.0779985	0.3198	0.10274	0.382653	-0.117647	1.37288	-0.205479	0.276042	-0.101078	0.818182	0.158879	-0.153933	0.0437569	0.977206	0.542056	0.071066	-0.0307692	0.213768	0.484848	0.696721	0.289474	-0.0666667	0.147368	0.0416667	0.0512821
0.517141	-0.0691685	0.338847	0.0787671	0.367347	-0.0311419	1.17797	-0.299087	0.239583	-0.128032	0.773668	0.0981308	-0.132584	0.0123757	1.00809	0.481308	0.0152284	-0.0615385	0.15942	0.527273	0.651639	0.394737	0.00952381	0.252632	-0.125	0.0769231
0.482859	-0.062546	0.353383	0.0856164	0.403061	-0.124567	1.22881	-0.237443	0.307292	-0.0822102	0.714107	0.17757	-0.11573	-0.00287293	0.999265	0.523364	-0.035533	0.138462	0.173913	0.509091	0.680328	0.302632	-0.209524	0.126316	-0.0104167	0.102564
0.490883	-0.071376	0.366416	0.0342466	0.403061	-0.17301	1.11017	-0.296804	0.390625	-0.106469	0.738558	0.285047	-0.131461	-0.0176796	1.02279	0.425234	-0.0152284	-0.0461538	0.123188	0.333333	0.643443	0.394737	-0.12381	0.178947	-0.0729167	0.0512821
0.468271	-0.0632818	0.372431	0.0513699	0.331633	-0.138408	1.15254	-0.273973	0.53125	-0.0747978	0.725392	0.0934579	-0.0820225	-0.0123757	1.00735	0.490654	-0.0406091	0.0461538	0.0289855	0.412121	0.635246	0.171053	-0.0666667	0.2	-0.197917	0.0769231
0.503282	-0.049301	0.425063	-0.00684932	0.403061	-0.141869	1.40678	-0.27169	0.416667	-0.0977089	0.658934	0.0841122	-0.121348	-0.0198895	1.10441	0.602804	-0.0304569	0	0.101449	0.387879	0.610656	0.315789	-0.047619	0.315789	-0.114583	0.111111
0.53027	-0.0257542	0.452632	0.0616438	0.357143	-0.197232	1.22881	-0.232877	0.34375	-0.0707547	0.739185	-0.252336	-0.0910112	-0.0302762	1.06765	0.542056	0.00507614	0.0307692	0.130435	0.375758	0.581967	0.25	-0.190476	0.410526	-0.0729167	0.153846
0.521517	-0.0301692	0.442105	0.0239726	0.346939	-0.141869	1.41525	-0.260274	0.416667	-0.0390836	0.660815	0.126168	-0.110112	-0.0475138	1.1	0.457944	0.035533	0.0307692	0.0797101	0.290909	0.606557	0.184211	-0.047619	0.378947	0.0520833	0.00854701
0.4814	-0.0183959	0.416541	0.0136986	0.270408	-0.141869	1.19492	-0.22831	0.520833	-0.0586253	0.647022	0.088785	-0.12809	-0.0855249	1.02059	0.406542	0.0862944	-0.107692	0.0507246	0.393939	0.581967	0.144737	-0.152381	0.347368	0.03125	-0.0683761
0.460248	-0.00883002	0.405514	-0.0376712	0.285714	-0.238754	1.33051	-0.260274	0.463542	-0.0491914	0.57931	0.182243	-0.126966	-0.0932597	1.07206	0.481308	0.00507614	-0.0153846	0	0.321212	0.581967	0.263158	-0.0857143	0.0631579	0.0104167	0.0512821
0.475565	-0.000735835	0.410526	-0.0171233	0.30102	-0.204152	1.29661	-0.22831	0.578125	-0.0215633	0.628213	0.266355	-0.129213	-0.0979006	1.06103	0.434579	0.0761421	0.0153846	-0.057971	0.315152	0.590164	0.144737	-0.152381	0.252632	-0.114583	0.0769231
0.49453	0	0.36792	-0.0513699	0.295918	-0.217993	1.28814	-0.212329	0.65625	-0.078841	0.533542	0.107477	-0.150562	-0.0914917	1.06471	0.425234	-0.0304569	-0.0307692	0.0398551	0.272727	0.602459	0.302632	-0.0380952	0.178947	-0.15625	0.0854701
0.483589	0.00147167	0.360902	-0.0719178	0.280612	-0.242215	1.24576	-0.292237	0.625	-0.150943	0.588088	0.186916	-0.132584	-0.101878	1.11471	0.38785	0.0964467	0	0.0144928	0.278788	0.598361	0.223684	-0.152381	0.284211	0.0104167	0.034188
0.558716	0.00809419	0.37594	-0.0890411	0.204082	-0.224913	1.33051	-0.221461	0.604167	-0.172507	0.601254	0.168224	-0.161798	-0.0481768	1.12279	0.378505	0.0862944	0.0307692	0.0217391	0.236364	0.631148	0.236842	-0.228571	0.105263	-0.0625	-0.119658
0.609044	0.0257542	0.383459	-0.109589	0.188776	-0.283737	1.44068	-0.315068	0.572917	-0.152291	0.586834	0.233645	-0.132584	-0.0581215	1.04338	0.471963	-0.035533	0.0461538	-0.0615942	0.315152	0.594262	0.315789	0.142857	0.221053	-0.166667	0.0512821
0.673231	0.066961	0.327318	-0.0993151	0.163265	-0.280277	1.13559	-0.276256	0.739583	-0.172507	0.607524	0.214953	-0.210112	-0.0654144	1.06618	0.420561	-0.071066	-0.0461538	-0.0108696	0.224242	0.577869	0.355263	-0.161905	0.231579	-0.0520833	-0.017094
0.657185	0.080206	0.298246	-0.140411	0.193878	-0.273356	1.10169	-0.267123	0.677083	-0.110512	0.515987	0.0747664	-0.194382	-0.0864088	1.06471	0.490654	-0.0101523	-0.0153846	0.0289855	0.151515	0.590164	0.0526316	-0.0857143	0.136842	-0.208333	-0.102564
0.672502	0.0934511	0.306767	-0.160959	0.147959	-0.121107	1.11864	-0.344749	0.5	-0.154313	0.633856	0.0794393	-0.258427	-0.0426519	1.07574	0.406542	0.0456853	0.0923077	-0.0797101	0.181818	0.577869	0.263158	0.0190476	0.263158	-0.145833	0.00854701
0.601751	0.182487	0.294737	-0.143836	0.178571	-0.269896	0.983051	-0.324201	0.484375	-0.115229	0.467712	0.102804	-0.213483	-0.0293923	1.03309	0.373832	0.0304569	0	-0.0869565	0.0969697	0.540984	0.144737	-0.0190476	0.221053	-0.208333	0
0.592998	0.222222	0.244612	-0.164384	0.132653	-0.193772	0.923729	-0.216895	0.703125	-0.104447	0.511599	0.219626	-0.240449	-0.0716022	0.977206	0.364486	0.121827	0.123077	0.0289855	0.163636	0.54918	0.131579	-0.104762	0.221053	-0.125	0.025641
0.579869	0.243561	0.2401	-0.191781	0.112245	-0.32526	0.949153	-0.283105	0.552083	-0.0916442	0.537931	0.0654206	-0.259551	-0.0645304	0.961029	0.383178	0.0609137	0	0.105072	0.272727	0.536885	0.289474	-0.152381	0.136842	-0.104167	0
0.611233	0.275202	0.244612	-0.167808	0.0918367	-0.214533	0.966102	-0.312785	0.625	-0.0721024	0.579937	0.0373832	-0.314607	-0.0780111	1.01985	0.350467	0.13198	0.0307692	-0.0652174	0.0424242	0.532787	0.144737	-0.180952	0.0315789	-0.145833	0.0854701
0.599562	0.309051	0.288722	-0.160959	0.102041	-0.276817	1.02542	-0.317352	0.541667	-0.0828841	0.481505	0.0280374	-0.25618	-0.0764641	0.964706	0.443925	0.071066	0.0307692	-0.0181159	0.0484848	0.520492	0.328947	-0.047619	0.115789	-0.0208333	-0.102564
0.631656	0.338484	0.226566	-0.184932	0.0663265	-0.256055	0.686441	-0.319635	0.484375	-0.041779	0.445768	0.0280374	-0.28764	-0.0483978	0.949265	0.453271	0.162437	0.0461538	-0.0978261	0.00606061	0.5	0.118421	-0.0666667	0.178947	-0.135417	0.0598291
0.60248	0.332597	0.199499	-0.181507	0.0867347	-0.269896	0.830508	-0.296804	0.604167	-0.0114555	0.440125	0.0186916	-0.3	-0.0682873	0.908824	0.514019	0.0456853	0.0153846	-0.0652174	0.0484848	0.565574	0.381579	-0.0666667	0.0842105	0.0208333	0
0.596645	0.376748	0.232581	-0.140411	0.0663265	-0.266436	0.737288	-0.315068	0.447917	0.0208895	0.423197	-0.0420561	-0.293258	-0.0433149	0.963971	0.383178	0.116751	0.0153846	-0.057971	0.181818	0.508197	0.0526316	-0.190476	0.0631579	-0.114583	-0.0854701
0.608315	0.367918	0.166917	-0.174658	0.0408163	-0.262976	0.669492	-0.289954	0.546875	-0.027628	0.473354	-0.0280374	-0.3	-0.0921547	0.827206	0.331776	0.116751	0	-0.188406	0.0242424	0.504098	0.368421	-0.104762	0.4	0.0104167	0.025641
0.609774	0.398087	0.157895	-0.178082	0.0408163	-0.318339	0.872881	-0.308219	0.609375	-0.0074124	0.417555	0.0934579	-0.349438	-0.0881768	0.868382	0.369159	0.0812183	-0.0153846	-0.163043	0.0121212	0.495902	0.131579	-0.171429	0.242105	-0.104167	-0.0854701
0.607586	0.432671	0.149875	-0.181507	0.0408163	-0.280277	0.627119	-0.299087	0.572917	0	0.380564	-0.00934579	-0.352809	-0.0647514	0.921324	0.350467	0.0456853	0.0153846	-0.0507246	0.0848485	0.491803	0.105263	-0.0285714	0.231579	-0.15625	-0.128205
0.645514	0.452539	0.14386	-0.202055	0.0663265	-0.242215	0.601695	-0.26484	0.447917	0.0309973	0.354859	0.0560748	-0.351685	-0.0713812	0.822059	0.35514	0.0101523	0	-0.076087	0.0606061	0.47541	0.0921053	-0.0761905	0.115789	-0.0104167	0.0940171
0.631656	0.47167	0.169925	-0.202055	0.0663265	-0.290657	0.491525	-0.317352	0.4375	-0.0215633	0.348589	-0.0046729	-0.360674	-0.0844199	0.840441	0.373832	0.0253807	0.0461538	-0.119565	0.0787879	0.42623	0	-0.0285714	0.305263	-0.0208333	-0.145299
0.600292	0.484915	0.21203	-0.232877	0.0459184	-0.273356	0.644068	-0.289954	0.447917	-0.0161725	0.398746	0.0981308	-0.376404	-0.0716022	0.782353	0.32243	0	0.0923077	-0.0833333	0.0909091	0.393443	0.223684	-0.171429	0.347368	-0.0625	-0.0854701
0.594457	0.520971	0.247619	-0.215753	0.0663265	-0.294118	0.618644	-0.319635	0.421875	-0.0128032	0.327273	-0.0934579	-0.366292	-0.0751381	0.801471	0.257009	0.0304569	0.0615385	-0.108696	0	0.348361	0.184211	-0.0571429	0.305263	-0.114583	-0.034188
0.592268	0.543046	0.256642	-0.212329	0.0714286	-0.287197	0.559322	-0.273973	0.463542	-0.0357143	0.294044	-0.0373832	-0.388764	-0.105635	0.825735	0.341121	0.0812183	0.0307692	-0.0471014	0.0909091	0.327869	0.263158	-0.2	0.0736842	-0.1875	0.00854701
0.5186	0.523179	0.238596	-0.229452	0.0153061	-0.273356	0.5	-0.226027	0.4375	-0.0606469	0.328527	0.0373832	-0.374157	-0.0970166	0.744118	0.261682	0.152284	-0.0461538	-0.0869565	0.0484848	0.352459	0.381579	-0.0285714	0.178947	0	-0.0598291
0.517141	0.507726	0.221554	-0.19863	0.0153061	-0.256055	0.745763	-0.315068	0.411458	-0.0532345	0.352351	-0.0700935	-0.410112	-0.119779	0.722794	0.504673	0.00507614	0.0923077	-0.0942029	-0.00606061	0.352459	0.0789474	0.0190476	0.242105	-0.09375	-0.034188
0.47046	0.491538	0.211028	-0.205479	0.0357143	-0.256055	0.661017	-0.262557	0.515625	-0.0774933	0.364263	0.0233645	-0.373034	-0.132376	0.680147	0.350467	0.0152284	0.0307692	-0.0289855	-0.00606061	0.356557	0.157895	-0.0666667	0.210526	-0.135417	-0.179487
0.45806	0.50699	0.198496	-0.232877	0.0102041	-0.301038	0.525424	-0.226027	0.510417	-0.0835579	0.366771	0.0327103	-0.38427	-0.145193	0.609559	0.443925	0.0253807	0.0153846	-0.0326087	0	0.340164	0	-0.0190476	0.294737	-0.135417	-0.119658
0.383662	0.484915	0.186967	-0.208904	-0.0255102	-0.311419	0.40678	-0.19863	0.526042	-0.119272	0.452665	-0.0186916	-0.373034	-0.146298	0.544118	0.415888	0.0659898	-0.0153846	-0.0615942	0	0.307377	0.0263158	-0.161905	0.0842105	-0.125	-0.017094
0.356674	0.512141	0.172932	-0.229452	0.0153061	-0.287197	0.466102	-0.23516	0.442708	-0.150943	0.366771	0.0280374	-0.386517	-0.154033	0.574265	0.415888	0.071066	-0.0461538	0.0144928	-0.030303	0.327869	0.184211	-0.104762	0.2	-0.03125	-0.025641
0.315098	0.525386	0.20802	-0.239726	-0.0357143	-0.283737	0.347458	-0.205479	0.34375	-0.174528	0.409404	-0.0233645	-0.337079	-0.172376	0.526471	0.443925	0.0862944	-0.0615385	-0.0797101	-0.121212	0.262295	-0.0394737	-0.0190476	0.263158	-0.0625	0.034188
0.308534	0.540103	0.197995	-0.243151	-0.0306122	-0.245675	0.398305	-0.146119	0.463542	-0.180593	0.330408	-0.0280374	-0.342697	-0.173481	0.497059	0.359813	0.0456853	0	-0.130435	0.0606061	0.266393	0.131579	-0.00952381	0.147368	-0.09375	-0.119658
0.268417	0.529065	0.17995	-0.25	0.0306122	-0.359862	0.355932	-0.189498	0.453125	-0.186658	0.354859	-0.00934579	-0.355056	-0.170829	0.493382	0.514019	0	-0.0769231	-0.0615942	0.0545455	0.221311	0.0921053	-0.0952381	0.0421053	-0.104167	0.0769231
0.239971	0.518028	0.16391	-0.195205	0.0561224	-0.321799	0.466102	-0.189498	0.484375	-0.181941	0.355486	0.0327103	-0.331461	-0.210829	0.440441	0.518692	0.0862944	-0.0461538	-0.148551	0.0363636	0.209016	0.0394737	-0.0285714	-0.0315789	-0.0729167	-0.102564
0.2655	0.505519	0.153885	-0.273973	-0.0102041	-0.352941	0.288136	-0.184932	0.427083	-0.206873	0.405016	-0.0140187	-0.376404	-0.194917	0.428676	0.397196	0.0203046	-0.0307692	-0.0978261	-0.0545455	0.20082	0.0526316	0.114286	0.105263	-0.0729167	0.0854701
0.255288	0.486387	0.173935	-0.291096	0	-0.397924	0.474576	-0.207763	0.427083	-0.227763	0.381191	-0.0560748	-0.370787	-0.204641	0.416912	0.313084	0.035533	-0.0461538	-0.101449	-0.0484848	0.192623	0.0921053	0.0857143	0.0105263	-0.125	-0.136752
0.258206	0.48418	0.209023	-0.311644	-0.0153061	-0.314879	0.288136	-0.136986	0.348958	-0.243261	0.358621	-0.0233645	-0.32809	-0.240663	0.458824	0.35514	0.106599	0.0307692	-0.0543478	-0.030303	0.192623	0.0131579	0.047619	0.294737	-0.0833333	0.025641
0.210066	0.501104	0.152882	-0.287671	-0.0357143	-0.33564	0.322034	-0.173516	0.40625	-0.229111	0.334169	-0.0046729	-0.362921	-0.277348	0.401471	0.406542	0.00507614	-0.0461538	-0.0978261	-0.0545455	0.196721	0.0526316	-0.152381	0.242105	-0.197917	0.0683761
0.233406	0.511405	0.223559	-0.287671	-0.0510204	-0.3391	0.220339	-0.146119	0.479167	-0.218329	0.30094	0.00934579	-0.359551	-0.286409	0.424265	0.285047	0.00507614	-0.0461538	0.00724638	0.00606061	0.258197	-0.0657895	-0.180952	0.0315789	-0.0625	-0.0598291
0.239241	0.537896	0.22005	-0.243151	-0.0510204	-0.252595	0.305085	-0.134703	0.380208	-0.189353	0.302821	-0.0373832	-0.376404	-0.280884	0.406618	0.425234	0.177665	0.0307692	-0.0217391	-0.0242424	0.221311	0	-0.142857	0.0736842	-0.0520833	-0.0683761
0.185266	0.577631	0.239098	-0.25	-0.0357143	-0.356401	0.228814	-0.0205479	0.380208	-0.142857	0.337931	-0.0607477	-0.392135	-0.276464	0.453676	0.369159	-0.0304569	-0.0307692	0.195652	0.109091	0.192623	0.0657895	-0.0380952	0.2	-0.125	-0.0854701
0.206419	0.568801	0.25213	-0.236301	0.0357143	-0.359862	0.313559	-0.125571	0.395833	-0.136792	0.288401	-0.116822	-0.364045	-0.315801	0.433088	0.28972	0.071066	-0.0153846	0.0471014	0.0545455	0.217213	0	0.0190476	0.4	-0.145833	0.034188
0.167761	0.561442	0.238596	-0.232877	-0.0510204	-0.318339	0.254237	-0.10274	0.567708	-0.114555	0.30721	-0.0841122	-0.373034	-0.315359	0.469118	0.350467	0.00507614	-0.107692	0.0398551	0.0424242	0.188525	-0.0131579	0.0761905	0	-0.135417	-0.196581
0.151714	0.560706	0.287218	-0.270548	-0.0153061	-0.380623	0.305085	-0.114155	0.3125	-0.0929919	0.305956	-0.0747664	-0.366292	-0.311381	0.436029	0.359813	0.0862944	-0.0153846	0.0905797	0.0484848	0.184426	-0.0263158	-0.0285714	0.147368	-0.0416667	-0.0683761
0.153173	0.557763	0.290727	-0.284247	-0.00510204	-0.352941	0.415254	-0.0388128	0.520833	-0.100404	0.35674	0.00934579	-0.408989	-0.311381	0.466912	0.345794	0.101523	0.0153846	0.076087	-0.127273	0.147541	0.105263	-0.0571429	0.0736842	-0.145833	0.0512821
0.102845	0.559971	0.177945	-0.291096	0.0561224	-0.370242	0.279661	-0.06621	0.515625	-0.0950135	0.338558	-0.0373832	-0.406742	-0.32442	0.513235	0.308411	-0.0152284	-0.0769231	0.0797101	-0.0181818	0.172131	-0.0131579	0.0190476	0.0842105	-0.15625	-0.017094
0.0919037	0.55482	0.178446	-0.291096	0.00510204	-0.352941	0.262712	-0.0890411	0.645833	-0.0700809	0.3279	-0.046729	-0.413483	-0.316685	0.656618	0.313084	0.0913706	-0.0615385	0.0471014	0.0484848	0.135246	-0.0921053	-0.0571429	0.0105263	-0.135417	-0.0683761
0.0641867	0.498896	0.124311	-0.297945	-0.0153061	-0.397924	0.279661	-0.116438	0.671875	-0.00606469	0.331661	0.00934579	-0.429213	-0.308729	0.663971	0.317757	-0.0913706	0.0307692	0.115942	-0.0545455	0.192623	0.105263	0	0.0947368	-0.145833	-0.0598291
0.02407	0.488595	0.0902256	-0.25	-0.0102041	-0.32872	0.186441	-0.134703	0.546875	0.0363881	0.367398	0.0373832	-0.435955	-0.323757	0.758088	0.257009	0.0152284	-0.0769231	0.0688406	-0.0424242	0.122951	0.144737	-0.0571429	0.0526316	-0.135417	-0.00854701
0.0299052	0.425313	0.0882206	-0.297945	-0.0510204	-0.384083	0.355932	-0.107306	0.536458	0.0572776	0.375549	0.0046729	-0.431461	-0.311602	0.761029	0.224299	0.182741	-0.0461538	0.0688406	-0.0181818	0.151639	-0.0657895	-0.00952381	0.126316	-0.135417	-0.119658
0.000729395	0.405445	0.0240602	-0.294521	-0.0561224	-0.373702	0.330508	-0.086758	0.59375	0.0289757	0.386834	-0.0514019	-0.420225	-0.299006	0.808088	0.191589	0.0659898	-0.0769231	0.144928	0.0363636	0.155738	-0.0131579	-0.133333	0.2	-0.1875	-0.145299
0.0189643	0.399558	0.0205514	-0.318493	-0.0357143	-0.301038	0.118644	0.0205479	0.598958	-0.00134771	0.28464	0.0046729	-0.423596	-0.292597	0.822794	0.313084	-0.0101523	-0.0923077	-0.057971	-0.0363636	0.147541	-0.0131579	-0.0380952	0.0631579	-0.15625	-0.025641
0.0262582	0.370861	0.037594	-0.243151	-0.0153061	-0.401384	0.194915	-0.0456621	0.6875	-0.0512129	0.268339	0.0420561	-0.452809	-0.306077	0.863235	0.266355	0.0609137	-0.0615385	0.0217391	-0.030303	0.155738	-0.118421	0.0571429	0.0526316	-0.15625	-0.042735
0.0211524	0.359088	0.0360902	-0.287671	-0.0408163	-0.373702	0.245763	-0.0273973	0.791667	-0.0525606	0.272727	0.0373832	-0.430337	-0.274033	0.819853	0.228972	0.0456853	-0.0153846	-0.0144928	-0.0545455	0.143443	-0.0131579	-0.0857143	0.0736842	0	-0.282051
0.0568928	0.32156	-0.00200501	-0.253425	-0.0612245	-0.359862	0.169492	-0.0913242	0.755208	-0.0485175	0.245768	0.0233645	-0.420225	-0.301657	0.774265	0.252336	0.00507614	-0.0923077	-0.0398551	-0.163636	0.168033	0.0131579	0.00952381	0.189474	-0.114583	0.025641
0.083151	0.360559	0.00300752	-0.236301	-0.0408163	-0.404844	0.211864	-0.0844749	0.796875	-0.0586253	0.260815	0.0046729	-0.450562	-0.278453	0.738235	0.28972	-0.0101523	-0.0769231	-0.0144928	-0.0121212	0.184426	-0.0921053	-0.0761905	0.0315789	-0.0833333	-0.0854701
0.106492	0.343635	0.0235589	-0.25	0.0510204	-0.321799	0.237288	-0.0365297	0.71875	-0.0896226	0.24953	0.0140187	-0.432584	-0.258122	0.744853	0.233645	-0.0304569	-0.0923077	0.0181159	-0.115152	0.127049	-0.0394737	0.0380952	0.126316	-0.09375	-0.025641
0.0948213	0.344371	0.0230576	-0.256849	-0.0714286	-0.422145	0.152542	-0.086758	0.75	-0.105121	0.30094	0.0046729	-0.430337	-0.254586	0.566912	0.149533	-0.0558376	-0.0769231	-0.0253623	-0.0121212	0.106557	0.105263	0.114286	-0.0421053	-0.104167	-0.025641
0.0503282	0.337012	0.0100251	-0.236301	-0.0255102	-0.415225	0.262712	-0.0410959	0.692708	-0.0761456	0.252038	-0.0327103	-0.438202	-0.278895	0.543382	0.154206	-0.0304569	-0.107692	-0.0543478	-0.151515	0.110656	0.0263158	-0.00952381	0.0105263	-0.135417	-0.0683761
0.059081	0.323767	0.0150376	-0.256849	-0.0612245	-0.349481	0.20339	-0.0410959	0.890625	-0.0700809	0.216928	0.0794393	-0.446067	-0.274033	0.509559	0.242991	-0.106599	-0.0769231	0.0289855	-0.163636	0.110656	-0.105263	-0.0285714	0.0526316	-0.197917	-0.179487
0.0692925	0.302428	-0.0175439	-0.294521	-0.102041	-0.373702	0.161017	-0.06621	0.822917	-0.117925	0.220063	0.0046729	-0.419101	-0.27337	0.385294	0.154206	-0.0456853	-0.0615385	-0.0797101	-0.145455	0.0860656	0.0263158	-0.142857	0.136842	-0.0729167	-0.0769231
0.0853392	0.300221	0.0220551	-0.277397	-0.0612245	-0.422145	0.152542	-0.0776256	0.921875	-0.0876011	0.27837	0.0841122	-0.417978	-0.298564	0.411765	0.154206	-0.111675	0.0153846	-0.0797101	-0.139394	0.0983607	0.0263158	-0.0380952	0.147368	-0.145833	-0.034188
0.059081	0.292862	0.0115288	-0.297945	-0.0306122	-0.321799	0.118644	-0.134703	0.838542	-0.0963612	0.236364	0.00934579	-0.447191	-0.290608	0.344118	0.135514	-0.137056	0.0153846	-0.105072	-0.133333	0.127049	-0.0131579	-0.047619	0.0210526	-0.09375	0.017094
0.0860686	0.285504	0.0255639	-0.277397	0.00510204	-0.346021	0.194915	-0.10274	0.854167	-0.101078	0.301567	-0.0420561	-0.433708	-0.275359	0.283824	0.168224	-0.071066	-0.0923077	-0.0434783	-0.133333	0.106557	0.0131579	0.047619	-0.0526316	-0.197917	-0.128205
0.075857	0.272259	0.0110276	-0.297945	0.0459184	-0.301038	0.0677966	-0.114155	0.90625	-0.0943396	0.24326	0.0560748	-0.410112	-0.303867	0.313235	0.158879	-0.0406091	-0.0461538	-0.0507246	-0.218182	0.0942623	-0.0263158	-0.0285714	0.0210526	-0.114583	-0.0940171
0.0860686	0.270052	0.0240602	-0.267123	0.0357143	-0.301038	0.101695	-0.125571	0.875	-0.0990566	0.208777	-0.0186916	-0.433708	-0.320221	0.247794	0.0981308	0.035533	0.0153846	-0.166667	-0.145455	0.118852	0.0263158	-0.0571429	-0.0736842	-0.114583	-0.0683761
0.0656455	0.275202	0.0591479	-0.280822	0.0153061	-0.391003	0.00847458	-0.109589	0.557292	-0.0902965	0.115987	-0.0140187	-0.453933	-0.338122	0.258088	0.140187	0.13198	-0.0307692	-0.0869565	-0.0727273	0.139344	-0.0394737	-0.161905	0.0947368	-0.09375	-0.025641
0.0751276	0.26858	0.083208	-0.270548	0.0102041	-0.297578	0.0338983	-0.0479452	0.697917	-0.105121	0.0959248	-0.0607477	-0.435955	-0.323978	0.25	0.214953	0.0203046	-0.0461538	-0.115942	-0.169697	0.131148	0.0394737	-0.0952381	0.157895	-0.15625	0.17094
0.0707513	0.26858	0.137343	-0.321918	0.102041	-0.321799	0	-0.114155	0.791667	-0.109838	0.030094	-0.0373832	-0.448315	-0.326409	0.227941	0.14486	0.035533	-0.0615385	-0.119565	-0.181818	0.110656	-0.0131579	-0.047619	-0.0421053	-0.104167	-0.128205
0.0875273	0.253863	0.133333	-0.308219	0.127551	-0.33218	0.0338983	-0.116438	0.651042	-0.110512	0.030094	-0.0327103	-0.459551	-0.315801	0.208824	0.11215	0.071066	-0.0153846	-0.17029	-0.157576	0.147541	0.0921053	-0.0571429	-0.0947368	-0.145833	-0.179487
0.10868	0.240618	0.152381	-0.321918	0.0918367	-0.283737	-0.0338983	-0.118721	0.635417	-0.12062	0.00689655	-0.0934579	-0.422472	-0.333923	0.177941	0.200935	-0.00507614	0	-0.115942	-0.157576	0.151639	-0.118421	-0.142857	0.0526316	-0.197917	-0.102564
0.140773	0.243561	0.122306	-0.315068	0.163265	-0.249135	-0.0169492	-0.127854	0.739583	-0.133423	0.0382445	-0.102804	-0.438202	-0.329724	0.2125	0.238318	0.0812183	-0.0307692	-0.152174	-0.133333	0.0778688	0.118421	0.047619	-0.0210526	-0.145833	-0.247863
0.143691	0.239146	0.141353	-0.308219	0.204082	-0.314879	0.00847458	-0.0799087	0.677083	-0.125337	0.030094	-0.0420561	-0.453933	-0.339448	0.215441	0.200935	-0.035533	0	-0.137681	-0.236364	0.172131	0.0526316	-0.133333	0.0526316	-0.09375	-0.145299
0.16922	0.231788	0.109774	-0.311644	0.137755	-0.363322	0	-0.136986	0.614583	-0.105121	0.0382445	-0.0140187	-0.459551	-0.316685	0.211029	0.242991	-0.0203046	-0.0769231	-0.119565	-0.224242	0.114754	0.0789474	0.0666667	0.0631579	-0.145833	-0.119658
0.215171	0.217807	0.128321	-0.325342	0.183673	-0.297578	0.127119	-0.152968	0.661458	-0.151617	0.0401254	-0.0841122	-0.449438	-0.317348	0.194853	0.158879	0.152284	-0.0615385	-0.0434783	-0.157576	0.114754	0.210526	-0.171429	0.0736842	0	-0.119658
0.246535	0.217071	0.0972431	-0.342466	0.168367	-0.290657	0.0423729	-0.13242	0.739583	-0.173854	0.0514107	-0.107477	-0.442697	-0.314475	0.198529	0.130841	0.035533	-0.0769231	-0.152174	-0.206061	0.204918	-0.0526316	-0.0857143	0.0210526	-0.0520833	-0.196581
0.238512	0.234731	0.0962406	-0.304795	0.188776	-0.301038	0	-0.086758	0.526042	-0.158356	0.112853	0.0373832	-0.452809	-0.316906	0.233824	0.182243	0.106599	-0.0769231	-0.115942	-0.212121	0.159836	0.0526316	-0.047619	0.105263	-0.145833	-0.25641
0.272064	0.228845	0.0912281	-0.284247	0.168367	-0.287197	0.0762712	-0.0913242	0.541667	-0.163747	0.205643	-0.0420561	-0.457303	-0.327293	0.215441	0.14486	-0.0152284	-0.0461538	-0.173913	-0.157576	0.143443	0	0.00952381	0	0.104167	-0.0512821
0.287381	0.225166	0.0651629	-0.219178	0.127551	-0.321799	0.271186	-0.134703	0.604167	-0.153639	0.32163	-0.046729	-0.473034	-0.325746	0.1875	0.186916	0.0304569	-0.0153846	-0.130435	-0.169697	0.122951	0	0.0380952	-0.0842105	-0.104167	-0.17094
0.326769	0.216336	0.0526316	-0.219178	0.0969388	-0.297578	0.177966	-0.0981735	0.5	-0.15903	0.349843	-0.116822	-0.45618	-0.339006	0.225735	0.0700935	0.0507614	-0.0307692	-0.221014	-0.242424	0.110656	-0.0789474	-0.0666667	0.0421053	-0.0625	-0.188034
0.318745	0.2156	0.0907268	-0.260274	0.0816327	-0.33564	-0.0169492	-0.00684932	0.567708	-0.16779	0.378683	-0.0280374	-0.439326	-0.321989	0.265441	0.14486	0.101523	-0.0307692	-0.206522	-0.224242	0.0696721	-0.0263158	-0.0380952	0.0526316	-0.114583	-0.0854701
0.296134	0.220751	0.0912281	-0.263699	0.112245	-0.342561	0	-0.0913242	0.427083	-0.126685	0.373668	-0.0747664	-0.459551	-0.312928	0.294853	0.14486	0.0558376	-0.0923077	-0.177536	-0.163636	0.0409836	0.105263	-0.0761905	0.147368	-0.0104167	-0.136752
0.271335	0.220751	0.0546366	-0.294521	0.0969388	-0.377163	0.110169	-0.0776256	0.427083	-0.141509	0.398119	-0.107477	-0.478652	-0.323757	0.3875	0.172897	-0.0152284	-0.0153846	-0.23913	-0.218182	0.0163934	-0.144737	-0.00952381	-0.0315789	-0.125	-0.128205
0.200584	0.23326	0.0887218	-0.325342	0.0663265	-0.318339	0.152542	-0.0593607	0.578125	-0.149596	0.494671	-0.0233645	-0.462921	-0.31116	0.436029	0.191589	-0.0507614	-0.0615385	-0.221014	-0.212121	-0.0204918	0.0263158	-0.047619	-0.0210526	-0.177083	-0.136752
0.136397	0.222222	0.075188	-0.315068	0.0459184	-0.290657	0	-0.0616438	0.46875	-0.159704	0.598746	-0.0747664	-0.460674	-0.320884	0.533824	0.126168	0.101523	0.0153846	-0.217391	-0.187879	0.00409836	-0.118421	-0.0666667	-0.0210526	-0.135417	-0.213675
0.113056	0.239146	0.0596491	-0.294521	0.0867347	-0.294118	0.0423729	-0.0707763	0.432292	-0.16442	0.647649	-0.116822	-0.477528	-0.327956	0.456618	0.14486	0.0456853	-0.0307692	-0.134058	-0.224242	0.0245902	-0.0526316	-0.0666667	-0.0315789	0.0625	-0.128205
0.0926331	0.24209	0.073183	-0.363014	0.107143	-0.352941	0.0677966	-0.0684932	0.5625	-0.214286	0.735423	-0.17757	-0.489888	-0.341657	0.522794	0.0981308	0.101523	0	-0.15942	-0.260606	-0.0204918	-0.0526316	-0.0666667	-0.0736842	0	-0.17094
0.0875273	0.241354	0.0536341	-0.315068	0.107143	-0.318339	0.20339	-0.0570776	0.375	-0.152291	0.752978	-0.172897	-0.459551	-0.33326	0.478676	0.158879	0.0101523	-0.0923077	-0.166667	-0.175758	-0.00409836	-0.0263158	-0.0571429	0.0421053	0.0104167	-0.230769
0.0948213	0.243561	0.0606516	-0.34589	0.0867347	-0.33564	0.144068	-0.0707763	0.348958	-0.163073	0.812539	-0.186916	-0.485393	-0.347403	0.498529	0.149533	0.137056	-0.0461538	-0.112319	-0.181818	-0.057377	-0.0394737	-0.161905	0.189474	-0.0833333	-0.119658
0.109409	0.225901	0.0471178	-0.342466	0.0918367	-0.370242	0.169492	-0.0296804	0.3125	-0.175876	0.799373	-0.163551	-0.473034	-0.334807	0.499265	0.126168	0.0456853	0	-0.141304	-0.2	-0.0532787	0.0789474	-0.0761905	-0.0526316	-0.0729167	-0.196581
0.116703	0.235467	0.0586466	-0.349315	0.132653	-0.307958	0.127119	-0.0319635	0.432292	-0.186658	0.657053	-0.0700935	-0.458427	-0.346298	0.450735	0.088785	0.035533	-0.0307692	-0.188406	-0.254545	-0.0737705	-0.0526316	-0.0571429	0.0526316	-0.0104167	-0.247863
0.142232	0.261221	0.0421053	-0.34589	0.112245	-0.314879	0.0508475	-0.0273973	0.260417	-0.174528	0.670846	-0.196262	-0.470787	-0.329503	0.469118	0.247664	0.0253807	-0.0615385	-0.224638	-0.193939	-0.0778688	0.0131579	-0.0666667	0.115789	-0.09375	-0.136752
0.113056	0.253863	0.0280702	-0.321918	0.107143	-0.359862	0.059322	-0.043379	0.328125	-0.157008	0.763009	-0.116822	-0.48764	-0.352486	0.488971	0.158879	-0.0152284	0.0153846	-0.15942	-0.272727	-0.0245902	-0.0394737	-0.0857143	0.0842105	-0.135417	-0.042735
0.145879	0.245033	0.0606516	-0.297945	0.204082	-0.356401	0.0254237	0.0547945	0.427083	-0.168464	0.774922	-0.0934579	-0.458427	-0.36442	0.410294	0.172897	0.0964467	-0.0615385	-0.134058	-0.121212	0.00409836	0.0921053	-0.161905	-0.0210526	-0.104167	-0.230769
0.164114	0.249448	0.0551378	-0.311644	0.173469	-0.32526	0.0932203	0.0388128	0.296875	-0.188005	0.821944	-0.11215	-0.449438	-0.360884	0.397794	0.163551	0.0203046	-0.0461538	-0.0978261	-0.260606	0.0409836	0.0526316	0.0285714	-0.105263	-0.197917	-0.145299
0.146608	0.243561	0.0441103	-0.280822	0.153061	-0.342561	-0.0677966	0.0616438	0.286458	-0.21496	0.883386	-0.172897	-0.449438	-0.378564	0.401471	0.182243	0.0964467	-0.0923077	-0.0869565	-0.2	0.0778688	-0.0263158	-0.0952381	0.0105263	-0.0625	-0.102564
0.142961	0.24209	0.0200501	-0.34589	0.173469	-0.377163	0.059322	0.086758	0.307292	-0.217655	0.905956	-0.0841122	-0.417978	-0.373923	0.384559	0.200935	0.0761421	-0.0307692	-0.112319	-0.181818	0.0737705	0.0131579	-0.0285714	-0.0526316	-0.09375	-0.188034
0.113786	0.239146	0.0340852	-0.304795	0.147959	-0.342561	0.110169	0.116438	0.234375	-0.221698	0.9279	-0.0981308	-0.41236	-0.385193	0.435294	0.107477	0.0101523	-0.0769231	-0.15942	-0.278788	0.0655738	-0.0789474	0	0	-0.104167	-0.145299
0.12108	0.230316	0.0150376	-0.339041	0.132653	-0.384083	0.0169492	0.180365	0.333333	-0.209569	0.926019	-0.140187	-0.388764	-0.379227	0.425	0.149533	0.0253807	-0.0307692	-0.141304	-0.254545	0.0614754	-0.118421	-0.0190476	0.0210526	-0.03125	-0.136752
0.105033	0.217807	0.0641604	-0.297945	0.163265	-0.373702	0	0.116438	0.291667	-0.224394	0.899687	-0.135514	-0.396629	-0.385414	0.416176	0.14486	0.106599	-0.0461538	-0.057971	-0.254545	0.0737705	0	-0.0571429	0.0421053	-0.1875	-0.153846
0.100656	0.210449	0.0365915	-0.321918	0.188776	-0.346021	0.0254237	0.210046	0.302083	-0.225741	0.958621	-0.154206	-0.38427	-0.394475	0.383088	0.168224	0.0406091	-0.0615385	-0.108696	-0.145455	0.147541	-0.105263	-0.0190476	-0.0736842	-0.104167	-0.153846
0.0999271	0.202355	0.0726817	-0.308219	0.219388	-0.370242	0.0932203	0.155251	0.239583	-0.227089	0.960502	-0.154206	-0.388764	-0.409724	0.383088	0.238318	0.0406091	-0.0307692	-0.101449	-0.145455	0.217213	-0.210526	-0.0190476	0.0210526	0	-0.145299
0.086798	0.209713	0.0566416	-0.349315	0.153061	-0.33564	0.0762712	0.166667	0.260417	-0.258086	0.865204	-0.135514	-0.423596	-0.40442	0.399265	0.350467	0.035533	0	-0.101449	-0.187879	0.204918	-0.171053	-0.12381	0.0736842	-0.15625	-0.17094
0.0561634	0.214864	0.045614	-0.35274	0.153061	-0.352941	-0.0338983	0.171233	0.234375	-0.219003	0.858934	-0.126168	-0.411236	-0.397569	0.3625	0.182243	0.0862944	0	-0.217391	-0.145455	0.229508	-0.0789474	-0.047619	0.0526316	-0.03125	-0.222222
0.0685631	0.214128	0.0651629	-0.342466	0.168367	-0.352941	0.0847458	0.152968	0.234375	-0.210243	0.873354	-0.107477	-0.401124	-0.392928	0.406618	0.135514	-0.0253807	-0.0307692	-0.0797101	-0.242424	0.237705	-0.157895	0.27619	0.168421	-0.0625	0.025641
0.0663749	0.214864	0.0320802	-0.294521	0.142857	-0.283737	0.0338983	0.212329	0.239583	-0.22035	0.868339	-0.17757	-0.375281	-0.376575	0.445588	0.14486	0.071066	0.0769231	-0.166667	-0.169697	0.290984	0.0526316	0.561905	-0.105263	-0.135417	-0.136752
0.0889861	0.190581	0.0305764	-0.297945	0.132653	-0.380623	0.0932203	0.19863	0.203125	-0.219003	0.917241	-0.17757	-0.364045	-0.367956	0.380147	0.158879	-0.0253807	-0.0461538	-0.152174	-0.181818	0.25	-0.144737	1.10476	0.0526316	-0.104167	-0.213675
0.086798	0.166299	0.0486216	-0.260274	0.158163	-0.363322	-0.0677966	0.23516	0.125	-0.213612	0.920376	-0.168224	-0.394382	-0.38232	0.383088	0.186916	-0.0609137	-0.0153846	-0.134058	-0.109091	0.254098	0.0526316	1.2	0.0210526	-0.0729167	-0.00854701
0.0970095	0.14128	0.043609	-0.277397	0.204082	-0.346021	-0.059322	0.184932	0.104167	-0.231806	0.867712	-0.135514	-0.358427	-0.385856	0.347059	0.14486	-0.0304569	-0.123077	-0.0942029	-0.206061	0.32377	-0.184211	1.93333	0.0421053	0.0104167	-0.179487
0.0984683	0.109639	0.0691729	-0.30137	0.158163	-0.32526	0.0169492	0.130137	0.177083	-0.218329	0.952978	-0.149533	-0.370787	-0.395359	0.376471	0.0700935	-0.0507614	0	-0.0652174	-0.0909091	0.307377	-0.236842	1.85714	0.105263	-0.0208333	-0.162393
0.137126	0.0890361	0.0877193	-0.287671	0.204082	-0.33564	0.0423729	0.136986	0.276042	-0.217655	0.944828	-0.140187	-0.352809	-0.390718	0.375735	0.088785	0.147208	-0.107692	-0.173913	-0.0848485	0.385246	-0.131579	2.45714	0.0842105	-0.0104167	-0.222222
0.124726	0.0905077	0.0536341	-0.273973	0.255102	-0.342561	0.0338983	0.157534	0.114583	-0.216307	0.978056	-0.102804	-0.320225	-0.389613	0.351471	0.0700935	0.0253807	-0.0615385	-0.115942	-0.145455	0.286885	0.0394737	2.5619	0.126316	-0.135417	-0.145299
0.134209	0.0647535	0.039599	-0.273973	0.22449	-0.373702	0.118644	0.139269	0.119792	-0.200135	0.873354	-0.158879	-0.319101	-0.392707	0.366176	0.116822	0.111675	-0.0461538	-0.0833333	-0.0424242	0.340164	0.0131579	3.00952	-0.0210526	-0.125	-0.205128
0.107221	0.0375276	0.0085213	-0.277397	0.193878	-0.387543	0.0677966	0.06621	0.0885417	-0.233154	0.867712	-0.172897	-0.335955	-0.381436	0.346324	0.130841	-0.0456853	-0.0461538	-0.141304	-0.175758	0.364754	0	2.87619	-0.0105263	0.104167	0.0683761
0.128373	0.0242826	0.00802005	-0.195205	0.168367	-0.366782	-0.059322	0.123288	0.171875	-0.253369	0.835737	-0.182243	-0.305618	-0.374365	0.347059	0.0841122	0.0456853	0.0307692	-0.144928	-0.0909091	0.385246	0.171053	3.40952	0.0526316	-0.0625	-0.205128
0.137856	-0.00147167	0.00601504	-0.239726	0.173469	-0.346021	0.059322	0.130137	0.0520833	-0.273585	0.954232	-0.224299	-0.311236	-0.367735	0.377206	0.0794393	-0.0152284	-0.107692	-0.105072	-0.133333	0.430328	0.0921053	3.70476	-0.0526316	-0.15625	-0.136752
0.0846098	-0.080206	-0.0546366	-0.239726	0.173469	-0.33564	0.0254237	0.125571	0.125	-0.299191	0.819436	-0.107477	-0.334831	-0.378564	0.329412	0.0700935	0.035533	0	-0.15942	-0.193939	0.0778688	-0.0921053	3.28571	0.0631579	-0.135417	-0.0769231
0.0736689	-0.222958	-0.0195489	-0.465753	0.112245	-0.418685	-0.0254237	-0.00684932	0.182292	-0.107817	0.261442	-0.242991	-0.406742	-0.472707	0.00955882	-0.121495	-0.0659898	0.0769231	-0.192029	-0.0909091	0.434426	0.197368	3.29524	0.0947368	0.03125	-0.179487
0.0532458	-0.263429	0.184461	-0.246575	0.117347	-0.356401	0.0254237	-0.0022831	0.1875	-0.00943396	1.01317	-0.116822	-0.278652	-0.368177	0.259559	0.135514	-0.0152284	0.615385	-0.0398551	0	0.758197	0.0394737	3.42857	0.231579	-0.03125	-0.00854701
0.0882567	-0.247976	0.557895	-0.14726	0.423469	-0.321799	0.161017	0.107306	0.260417	0.123989	1.17618	0.140187	-0.0730337	-0.23558	0.680147	0.518692	0.0456853	0.876923	0.199275	0.321212	1	0.631579	3.46667	0.568421	0.0833333	-0.00854701
0.207877	-0.199411	0.651629	0.0376712	0.55102	-0.134948	0.144068	0.109589	0.697917	0.239892	1.50909	0.598131	0.142697	-0.0358011	1.07426	0.630841	0.329949	1.18462	0.782609	0.684848	1.22131	1.13158	3.15238	0.778947	0.385417	0.264957
0.207148	-0.128771	0.79198	0.19863	0.816327	0.0484429	0.135593	0.0821918	0.916667	0.351752	1.62759	0.990654	0.402247	0.184088	1.38015	1.07477	0.690355	1.50769	1.1413	0.90303	1.42623	1.47368	3.18095	0.936842	0.427083	0.470085
0.350109	-0.0551876	0.915789	0.393836	1.0051	0.252595	0.322034	0.1621	1.25	0.574798	1.75862	1.32243	0.557303	0.418564	1.82279	1.32243	1.05584	1.75385	1.67754	1.18182	1.62295	1.97368	3.22857	1.16842	0.604167	0.376068
0.398249	0.00294334	1.01353	0.606164	0.979592	0.349481	0.313559	0.23516	1.58333	0.787062	1.87524	1.47196	0.859551	0.677127	2.19706	1.64486	1.62944	2.12308	2	1.61212	1.7623	2.5	3.09524	1.08421	0.666667	0.401709
0.440554	0.0779985	1.12381	0.678082	1.02551	0.508651	0.466102	0.251142	1.84375	0.847709	1.97492	1.70561	1.12921	0.818564	2.59706	1.86916	1.73604	2.55385	2.16304	2	1.82787	2.93421	2.95238	1.6	0.989583	0.803419
0.551422	0.122884	1.12481	0.842466	1.01531	0.653979	0.288136	0.360731	2.16146	1.01752	1.86458	1.77103	1.31573	1.02254	3.01397	2.31776	2.11675	2.6	2.3587	2.17576	1.9918	3.19737	2.78095	1.66316	1.04167	0.692308
0.606856	0.11479	1.22707	1.00342	1.0102	0.84083	0.322034	0.333333	2.22917	1.15768	1.83323	1.76168	1.40562	1.22851	3.31618	2.18692	2.24873	2.78462	2.65942	2.56364	1.91803	3.59211	2.6381	1.66316	1.05208	0.931624
0.681255	0.210449	1.29674	1.07877	1.15306	1	0.40678	0.456621	2.59896	1.32817	1.97555	2.00467	1.68202	1.38807	3.67132	2.18224	2.44162	2.92308	2.93478	3.01212	1.9959	3.69737	2.60952	1.6	1.07292	0.982906
0.760759	0.252391	1.31078	1.14726	1.08673	1.14187	0.627119	0.509132	2.875	1.5	2.05893	2.12617	1.8	1.55934	3.79779	2.50467	2.78173	3.13846	2.90217	3.18788	2.07377	4.22368	2.51429	1.83158	1.01042	1.03419
0.789205	0.271523	1.67118	1.33562	1.15816	1.26298	0.923729	0.422374	3.09896	1.72035	2.05893	2.20093	2.03034	1.53149	4.05	2.90187	3.12183	3.06154	2.72826	3.15152	2.07377	4.47368	2.46667	1.8	1.38542	1.06838
0.848286	0.273731	1.5193	1.27055	1.22959	1.26644	0.70339	0.531963	3.28125	1.74326	2.22821	2.38318	2.0618	1.63779	4.30147	2.73832	3.04569	2.98462	2.69203	3.36364	2.18852	4.85526	2.41905	1.78947	1.52083	1.04274
0.885485	0.295806	1.52231	1.41438	1.27041	1.3391	0.838983	0.534247	3.21875	1.90499	2.29843	2.23364	2.14157	1.71072	4.49706	2.85981	3.2335	3.09231	2.8442	3.19394	2.20492	4.60526	2.1619	2.01053	1.4375	1.10256
0.911014	0.273731	1.61353	1.50342	1.25	1.47059	1.02542	0.577626	3.52604	1.96294	2.34671	2.57477	2.35955	1.71293	4.72794	2.84112	3.37563	3.06154	2.77899	3.08485	2.25	5.15789	2.26667	1.77895	1.59375	0.948718
0.943107	0.314937	1.53784	1.42808	1.30102	1.38754	0.889831	0.716895	3.55729	1.97102	2.479	2.53738	2.39775	1.76133	4.99853	2.85047	3.43147	3	2.70652	3.14545	2.40574	4.18421	2.06667	1.73684	1.75	1.2735
0.957695	0.350993	1.64311	1.45205	1.27551	1.50173	0.932203	0.648402	3.76562	2.00876	2.33856	2.58411	2.52472	1.77569	5.13382	2.70093	3.78173	3.32308	2.67754	3.08485	2.45082	4.23684	1.94286	1.70526	1.57292	1
1.02699	0.36571	1.70476	1.44863	1.32653	1.37716	0.974576	0.60274	3.89062	2.10108	2.56803	2.50467	2.5809	1.82851	5.35368	2.81308	3.60914	2.95385	2.63406	3.18182	2.84426	4.81579	1.85714	1.83158	1.75	0.982906
0.972283	0.384842	1.8812	1.43493	1.34184	1.44637	1.00847	0.636986	3.47917	2.06065	2.50282	2.82243	2.55169	1.82519	5.45809	2.53738	3.41624	2.98462	2.66304	3.10303	2.40164	4.75	1.86667	1.63158	1.67708	0.948718
1.18818	0.732892	1.42907	1.60616	0.709184	1.35986	1.41525	0.899543	2.89583	1.67116	2.25455	2.95327	1.98764	1.58077	5.07941	2.80841	3.06091	1.78462	2.67754	3.12121	2.79098	4.55263	1.67619	1.86316	1.60417	0.324786
1.23122	0.912436	2.63509	2.12329	0.867347	1.75087	1.72881	0.972603	4.15625	2.06334	2.71473	3.2757	2.41011	1.77569	5.725	4.97664	3.49239	2.04615	3.31522	2.86667	2.82377	4.85526	1.61905	2.30526	1.70833	1.30769
1.28738	0.941133	2.70476	2.10959	1.18878	1.6955	2.09322	0.80137	4.52604	2.13208	2.72414	3.53271	2.46292	1.93768	5.76838	5.21963	3.37056	2.27692	3.32246	3.16364	2.81148	4.94737	1.5619	2.25263	1.45833	1.30769
1.32604	1.01177	2.70877	2.10959	1.09184	1.7474	1.95763	0.812785	4.42188	2.03302	2.78495	3.28037	2.53595	1.80818	5.57868	5.52336	2.83249	2.33846	3.04348	3.21212	2.82377	4.53947	1.38095	2.24211	1.59375	1.40171
1.3574	1.1067	2.62456	2.10616	1.15816	1.7128	1.97458	0.872146	4.32292	2.05256	2.86144	3.23832	2.44045	1.93746	5.49485	5.52336	2.79188	2.32308	3.22101	3.32121	2.67623	4.51316	1.4	2.17895	1.77083	1.41026
1.36761	1.17071	2.61855	2.18493	1.11735	1.73356	2.05932	0.742009	4.22396	2.03032	2.96176	3.17757	2.33034	1.8042	5.63676	5.91121	2.61929	2.21538	2.98188	3.23636	2.57787	4.69737	1.21905	1.96842	1.52083	1.48718
1.37199	1.21413	2.51278	2.11986	1.08163	1.67474	2.28814	0.83105	4.35938	1.96294	2.81379	3.06075	2.26517	1.89768	5.65147	5.36449	2.40102	2.13846	3.18478	3.3697	2.53689	4.21053	1.32381	2.03158	1.57292	1.35043
1.32166	1.23547	2.55288	2.20548	1.02041	1.86159	2.30508	0.853881	4.32292	1.88073	2.93417	2.92991	2.23708	1.90564	5.58309	5.1215	2.37056	1.96923	2.97464	3.30909	2.47131	4.11842	1.1619	1.88421	1.65625	1.47863
1.26185	1.26049	2.48722	2.10616	0.994898	1.58824	2.48305	0.833333	4.04167	1.91846	2.8652	2.82243	2.27753	1.82939	5.55147	5.15421	2.58376	2	2.99275	3.32727	2.46311	3.80263	1.17143	1.86316	1.83333	1.39316
1.29322	1.25607	2.48321	2.10959	0.938776	1.58478	2.5	0.821918	4.03646	1.91375	2.94545	2.62617	2.06517	1.80354	5.55882	4.97196	2.39594	1.92308	3.03261	3.24848	2.40984	3.98684	1.00952	1.89474	1.5625	1.34188
1.22903	1.25533	2.41754	2.06164	0.923469	1.48097	2.5	0.892694	3.96354	1.89286	2.81567	2.55607	1.9809	1.83757	5.52794	5.04206	2.43655	1.86154	2.91667	3.32121	2.34426	3.97368	1.05714	1.82105	1.39583	1.4188
1.21736	1.24724	2.25614	2.14041	0.75	1.46367	2.5	0.906393	3.97396	1.87399	2.55925	2.50935	1.98427	1.85171	5.40147	5.13551	2.25381	1.87692	2.77899	3.30909	2.32377	4	0.952381	1.54737	1.38542	1.4188
1.17214	1.23547	2.34236	2.03425	0.739796	1.48789	2.36441	0.863014	4.28646	1.82412	2.46771	2.55607	1.96404	1.8789	5.42206	5.0514	2.12183	1.78462	2.83333	3.06667	2.20902	3.52632	0.904762	1.52632	1.46875	1.38462
1.1364	1.20751	2.35439	2.00685	0.647959	1.48443	2.47458	0.828767	3.94792	1.79515	2.43762	2.46262	1.82135	1.82497	5.61397	4.90187	2.27411	1.73846	2.81159	3.07879	2.21721	3.69737	0.895238	1.63158	1.23958	1.17094
1.1043	1.18249	2.28421	1.93151	0.581633	1.48443	2.45763	0.799087	3.75	1.8221	2.3768	2.29907	1.78202	1.69812	5.60735	4.65888	2.06599	1.61538	2.63406	3.23636	2.29098	3.59211	0.809524	1.58947	1.1875	1.51282
1.09555	1.13319	2.34386	1.91438	0.566327	1.50173	2.5339	0.805936	3.79167	1.74663	2.26646	2.18224	1.75056	1.70895	5.7375	4.82243	1.95431	1.66154	2.58696	3.04848	2.13525	3.28947	0.819048	1.55789	1.11458	1.4359
1.07732	1.08389	2.2391	1.86986	0.55102	1.39446	2.41525	0.821918	3.59896	1.73383	2.30909	2.26168	1.72584	1.64906	5.35221	4.87383	1.69036	1.56923	2.58696	2.73333	2.13934	3.32895	0.857143	1.25263	1.20833	1.42735
1.07221	1.07358	2.11328	1.85274	0.489796	1.28028	2.37288	0.844749	3.39583	1.65431	2.21066	2.09813	1.66966	1.63381	5.15441	4.91121	1.81726	1.6	2.53986	2.8	2.18033	3.25	0.780952	1.35789	1.03125	1.33333
1.07294	1.04489	2.05464	1.83562	0.494898	1.26298	2.34746	0.805936	3.3125	1.63612	2.1511	2.08411	1.54719	1.54895	5.05294	4.53738	1.75127	1.50769	2.3587	2.73939	2.02869	3.18421	0.628571	1.30526	1.0625	1.32479
1.00438	1.01472	2.06366	1.78767	0.387755	1.3391	2.27966	0.835616	3.21875	1.59367	2.11411	1.95794	1.59775	1.49635	4.95368	4.42991	1.71574	1.49231	2.11232	2.53939	1.9877	2.97368	0.695238	1.35789	1.01042	1.23932
0.989788	1.00589	2.06717	1.76027	0.341837	1.38754	2.52542	0.851598	3.05729	1.55795	1.93605	1.71028	1.50674	1.47536	4.78676	4.30374	1.75635	1.43077	2.18841	2.46667	1.96311	2.75	0.590476	1.11579	0.947917	1.33333
0.968636	0.981604	2.00201	1.67123	0.341837	1.22145	2.16949	0.86758	2.91667	1.40768	2.00439	1.70561	1.50112	1.46298	4.69265	4.10748	1.59898	1.38462	2.0942	2.21818	1.95902	2.75	0.6	1.02105	0.875	1.1453
0.924143	0.955114	1.95038	1.66096	0.260204	1.20761	2.44915	0.842466	2.80729	1.38881	1.86144	1.68692	1.47303	1.40994	4.32574	4.1729	1.54315	1.33846	1.94565	2.33333	1.90574	2.59211	0.533333	1.22105	0.760417	1.19658
0.922684	0.918322	1.93784	1.55137	0.219388	1.29412	2.59322	0.942922	2.82292	1.26617	1.95298	1.69626	1.40112	1.38166	4.00809	4.04206	1.52284	1.33846	1.80435	2.29091	1.86475	2.65789	0.504762	1.02105	0.645833	1.11966
0.925602	0.880795	1.9614	1.4863	0.22449	1.22837	2.54237	0.920091	2.59896	1.10782	1.81818	1.62617	1.4236	1.36177	3.68162	3.77103	1.40102	1.23077	1.81884	2.05455	1.82377	2.53947	0.552381	1.05263	0.5625	1.17949
0.885485	0.843267	1.86165	1.41096	0.219388	1.16263	2.45763	0.847032	2.46875	1.0903	1.68527	1.64486	1.29551	1.26343	3.49265	3.71028	1.27919	1.13846	1.64855	2.00606	1.81967	2.30263	0.552381	1.08421	0.854167	1.05128
0.841721	0.807947	1.82556	1.35959	0.209184	1.06228	2.38136	0.780822	2.44271	0.993261	1.77241	1.6028	1.30674	1.26033	3.33971	3.66822	1.42132	1.2	1.72101	1.72727	1.70492	2.59211	0.580952	0.821053	0.572917	0.905983
0.781182	0.779249	1.77494	1.29795	0.193878	1.09689	2.27966	0.746575	2.20833	0.955526	1.74169	1.29907	1.31011	1.21149	3.2625	3.53271	1.40102	1.12308	1.50362	1.74545	1.70902	2.25	0.47619	0.905263	0.572917	0.82906
0.762217	0.750552	1.59348	1.22945	0.153061	1.09343	2.05085	0.751142	2.26562	0.904987	1.74232	1.25701	1.16404	1.19425	3.26397	3.33645	1.16751	1.15385	1.40217	1.6	1.67623	2.26316	0.552381	1.29474	0.489583	0.871795
0.720642	0.733628	1.62607	1.18836	0.122449	0.892734	2.33051	0.675799	2.11458	0.91779	1.66144	1.36916	1.12697	1.17017	3.22059	3.3785	1.02538	1.04615	1.3913	1.49091	1.59016	1.90789	0.466667	0.778947	0.5	0.897436
0.731583	0.715968	1.47469	1.17808	0.153061	0.927336	2.01695	0.646119	1.77083	0.872642	1.65956	1.23364	1.11461	1.15359	3.23456	3.36449	1.14213	0.953846	1.29348	1.61818	1.61475	1.67105	0.466667	0.789474	0.5625	0.923077
0.704595	0.704194	1.52832	1.14726	0.0510204	0.747405	2.33898	0.60274	1.69271	0.865229	1.56489	1.23832	1.03371	1.13348	3.21912	3.27103	1.18782	1.03077	1.11232	1.38788	1.65574	1.81579	0.238095	0.757895	0.541667	0.777778
0.644055	0.688006	1.38195	1.0274	0.0867347	0.83737	1.82203	0.783105	1.5	0.82345	1.56803	1.30841	1.06517	1.08619	3.20074	3.32243	1.28426	0.861538	1.19928	1.31515	1.54508	1.56579	0.552381	0.642105	0.5625	0.700855
0.655726	0.675497	1.20952	1.00342	0.0765306	0.799308	2	0.680365	1.44792	0.730458	1.54545	1.12617	0.940449	1.0968	3.17353	3.1729	1.13198	0.753846	0.923913	1.33333	1.55738	1.93421	0.352381	0.736842	0.541667	0.683761
0.619985	0.662252	1.19398	0.90411	0.0510204	0.716263	1.86441	0.591324	1.34896	0.735175	1.54734	1.1028	0.914607	1.05878	3.10662	3.36916	1.13706	0.784615	0.873188	1.26061	1.53279	1.65789	0.485714	0.778947	0.510417	0.555556
0.600292	0.642384	1.15188	0.866438	0.0714286	0.608997	1.77119	0.625571	1.36458	0.677898	1.57492	1.11682	0.860674	1.05923	3.17868	3.21495	0.994924	0.661538	0.778986	1.13333	1.61475	1.28947	0.257143	0.652632	0.541667	0.598291
0.586433	0.638705	1.04662	0.780822	0.0306122	0.557093	1.76271	0.577626	1.34375	0.71159	1.49655	1.08879	0.850562	1.04641	3.34044	3.07477	1.15228	0.723077	0.858696	1.13333	1.47131	1.78947	0.32381	0.473684	0.489583	0.57265
0.583516	0.629139	0.93183	0.756849	0.0510204	0.522491	1.66102	0.559361	1.32292	0.697439	1.3605	0.915888	0.801124	1.03779	3.31618	3.22897	1.24873	0.584615	0.73913	0.993939	1.45082	1.34211	0.342857	0.494737	0.364583	0.435897
0.558716	0.619573	0.899248	0.695205	0.0408163	0.425606	1.91525	0.538813	1.27083	0.744609	1.40564	0.925234	0.72809	1.01193	3.61912	2.8271	1.04061	0.553846	0.601449	0.987879	1.39754	1.52632	0.304762	0.652632	0.458333	0.418803
0.576222	0.608536	0.888722	0.671233	0.0357143	0.33564	1.68644	0.600457	1.21354	0.704852	1.33103	0.864486	0.765169	0.995801	3.63529	3.01402	1.05584	0.523077	0.554348	0.939394	1.36066	1.19737	0.590476	0.378947	0.5	0.470085
0.544128	0.624724	0.874687	0.606164	0.0459184	0.33564	1.54237	0.527397	1.07292	0.748652	1.36677	0.813084	0.764045	0.972376	3.89118	2.76168	0.862944	0.430769	0.605072	0.951515	1.35656	1.27632	0.371429	0.442105	0.375	0.350427
0.540481	0.629875	0.846617	0.565068	0.0663265	0.32872	1.65254	0.538813	1.0625	0.768194	1.38871	0.724299	0.693258	0.942983	3.99926	2.70561	0.979695	0.292308	0.478261	0.921212	1.35656	0.973684	0.304762	0.631579	0.375	0.196581
0.54194	0.618837	0.837093	0.565068	0.0357143	0.280277	1.44068	0.511416	1.03125	0.812668	1.37241	0.714953	0.602247	0.939889	4.08971	2.57944	1.0203	0.353846	0.355072	0.866667	1.27459	1.23684	0.238095	0.526316	0.302083	0.470085
0.520058	0.604856	0.825564	0.476027	-0.00510204	0.228374	1.5	0.431507	0.984375	0.820755	1.25643	0.672897	0.497753	0.963315	4.13824	2.42523	0.857868	0.307692	0.34058	0.854545	1.22541	1.14474	0.27619	0.494737	0.145833	0.299145
0.53027	0.607064	0.790476	0.44863	0.0102041	0.238754	1.39831	0.369863	1.08333	0.774933	1.21944	0.817757	0.460674	0.869171	4.06471	2.54673	0.984772	0.276923	0.427536	0.721212	1.19672	0.947368	0.257143	0.378947	0.3125	0.316239
0.489424	0.618837	0.741353	0.438356	-0.0102041	0.186851	1.55085	0.344749	1.06771	0.693396	1.25204	0.691589	0.421348	0.890829	4.14412	2.31308	1.01523	0.169231	0.347826	0.763636	1.14754	1.03947	0.133333	0.389474	0.291667	0.299145
0.504012	0.621045	0.691729	0.366438	-0.0816327	0.179931	1.51695	0.349315	0.953125	0.743935	1.13605	0.71028	0.289888	0.844641	4.05441	2.26168	1.08629	0.2	0.311594	0.769697	1.15164	0.828947	0.295238	0.326316	0.364583	0.299145
0.535376	0.609272	0.691729	0.349315	-0.0765306	0.211073	1.59322	0.333333	0.989583	0.736523	1.08903	0.691589	0.273034	0.79558	4.00221	2.24766	0.944162	0.123077	0.271739	0.715151	1.15574	0.907895	0.190476	0.242105	0.270833	0.188034
0.514953	0.577631	0.638596	0.294521	-0.0255102	0.179931	1.24576	0.280822	0.869792	0.752695	1.04639	0.579439	0.220225	0.761768	4.05882	2.08878	1.00508	0.138462	0.224638	0.70303	1.11066	0.723684	0.228571	0.4	0.28125	0.0940171
0.551422	0.551141	0.635589	0.260274	-0.0561224	0.0726644	1.40678	0.205479	0.9375	0.705526	1.02257	0.663551	0.153933	0.72	3.80809	2.06542	0.954315	0.123077	0.300725	0.581818	1.05738	0.671053	0.285714	0.336842	0.479167	0.162393
0.549234	0.544518	0.6401	0.294521	-0.0969388	0.0207612	1.31356	0.221461	1.07292	0.712938	1.0652	0.602804	0.119101	0.698785	3.81912	2.18692	1.0203	0.0923077	0.192029	0.533333	1.06148	0.644737	0.266667	0.452632	0.229167	0.264957
0.598104	0.532009	0.618546	0.277397	-0.112245	0.152249	1.33051	0.253425	1.06771	0.741914	1.00063	0.53271	0.120225	0.655691	3.89338	2.13084	0.807107	0.0307692	0.148551	0.575758	1	0.868421	0.247619	0.484211	0.0625	0.222222
0.601751	0.530537	0.586466	0.284247	-0.127551	0.0242215	1.36441	0.187215	0.916667	0.687332	0.926646	0.46729	0.0606742	0.679558	3.65074	2.04673	0.908629	0.0923077	0.217391	0.630303	0.983607	0.710526	0.266667	0.463158	0.427083	0.145299
0.608315	0.529065	0.603509	0.273973	-0.183673	-0.0380623	1.11864	0.255708	1.11979	0.692048	0.941693	0.523364	0.0202247	0.60663	3.67206	1.96262	0.837563	0.0615385	0.115942	0.551515	0.922131	0.697368	0.219048	0.4	0.197917	0.102564
0.572575	0.531273	0.56391	0.260274	-0.158163	-0.0138408	1.11864	0.0502283	1.04167	0.677898	0.916614	0.303738	0.0101124	0.515359	3.5625	1.93458	0.84264	0.0923077	0.126812	0.50303	0.864754	0.907895	0.0571429	0.515789	0.3125	0.0854701
0.56674	0.525386	0.552381	0.202055	-0.19898	-0.0207612	0.983051	0.0844749	0.859375	0.635445	0.921003	0.485981	0	0.484862	3.46691	1.97664	0.86802	0	0.0652174	0.454545	0.844262	0.763158	0.104762	0.252632	0.166667	0.042735
0.532458	0.516556	0.564411	0.208904	-0.158163	-0.138408	1.00847	0.0570776	0.880208	0.634771	0.912853	0.373832	-0.00561798	0.414144	3.46618	1.92991	0.766497	0.0153846	0.0434783	0.581818	0.852459	0.828947	0.180952	0.294737	0.208333	0.0854701
0.506929	0.532009	0.581454	0.215753	-0.193878	-0.176471	1.01695	0.105023	0.916667	0.653639	0.813793	0.495327	-0.0314607	0.42011	3.55662	1.8972	0.944162	0.0153846	0.0144928	0.418182	0.77459	0.552632	0.27619	0.431579	0.25	0.034188
0.479942	0.520971	0.581454	0.232877	-0.239796	-0.145329	1.0678	0.0251142	0.854167	0.601752	0.836991	0.373832	-0.0191011	0.356243	3.49338	2.07009	0.93401	-0.0307692	0.0253623	0.418182	0.717213	0.631579	0.161905	0.326316	0.21875	0.17094
0.514223	0.501104	0.57594	0.212329	-0.234694	-0.148789	1.05085	0.0570776	0.84375	0.582884	0.851411	0.257009	-0.058427	0.322652	3.52279	1.8972	0.964467	0.0615385	0	0.412121	0.72541	0.407895	0.257143	0.157895	0.239583	-0.025641
0.482859	0.483444	0.606516	0.202055	-0.234694	-0.152249	0.728814	-0.0136986	0.791667	0.566712	0.721003	0.369159	-0.0696629	0.218785	3.49853	1.90654	1.17766	0.0461538	0.0108696	0.248485	0.643443	0.539474	0.133333	0.357895	0.333333	0.0940171
0.51787	0.495953	0.566917	0.212329	-0.22449	-0.138408	0.889831	0.0479452	0.78125	0.558625	0.734796	0.257009	-0.0561798	0.241326	3.15515	1.99065	0.944162	-0.0461538	0.0108696	0.375758	0.569672	0.381579	0.00952381	0.326316	0.229167	0.188034
0.440554	0.494481	0.599499	0.15411	-0.22449	-0.221453	0.90678	-0.0205479	0.703125	0.522237	0.689028	0.21028	-0.0662921	0.181215	3.17279	1.84112	0.989848	0.0153846	-0.0253623	0.387879	0.520492	0.342105	0.409524	0.336842	0.104167	0.034188
0.38585	0.504783	0.574436	0.15411	-0.219388	-0.193772	0.754237	-0.0639269	0.677083	0.530997	0.665831	0.238318	-0.126966	0.167293	2.96324	1.91589	1.05076	0.0153846	-0.0398551	0.381818	0.434426	0.736842	0.12381	0.484211	0.125	0.205128
0.28884	0.491538	0.633584	0.167808	-0.219388	-0.217993	0.694915	-0.0821918	0.630208	0.521563	0.66395	0.345794	-0.104494	0.115801	2.91471	1.78505	1.07107	0.0153846	-0.057971	0.272727	0.389344	0.552632	0.104762	0.378947	0.197917	0.0683761
0.245077	0.508462	0.681704	0.123288	-0.209184	-0.235294	0.669492	-0.116438	0.755208	0.491914	0.690909	0.257009	-0.11573	0.0762431	2.84559	2.0514	0.964467	0.0307692	-0.0398551	0.290909	0.389344	0.421053	0.180952	0.242105	0.125	0.196581
0.293217	0.529801	0.678697	0.157534	-0.234694	-0.224913	0.728814	-0.0251142	0.697917	0.456873	0.626959	0.285047	-0.108989	0.0676243	2.78382	2	1.14213	-0.0461538	-0.0942029	0.351515	0.364754	0.434211	0.171429	0.326316	0.09375	-0.0598291
0.352298	0.545254	0.723308	0.160959	-0.239796	-0.245675	0.525424	0.0022831	0.578125	0.462264	0.6	0.172897	-0.211236	0.0565746	2.74706	1.66355	1.21827	0	-0.119565	0.272727	0.340164	0.236842	0.0666667	0.305263	0.208333	0.017094
0.362509	0.543782	0.789474	0.109589	-0.244898	-0.283737	0.567797	-0.043379	0.5625	0.456199	0.557994	0.271028	-0.233708	0.0678453	2.67647	1.93458	1.2132	0.0153846	-0.0833333	0.175758	0.381148	0.394737	0.0571429	0.242105	0.375	0.025641
0.369803	0.612215	0.901253	0.0993151	-0.244898	-0.235294	0.550847	-0.109589	0.604167	0.480458	0.569279	0.130841	-0.210112	0.080884	2.59044	1.9486	1.19289	0	-0.134058	0.181818	0.356557	0.513158	0.152381	0.168421	0.208333	-0.025641
0.356674	0.644592	0.875188	0.116438	-0.265306	-0.242215	0.601695	-0.118721	0.447917	0.481806	0.546081	0.17757	-0.191011	0.0981215	2.74412	1.81308	1.04061	0.0615385	-0.148551	0.206061	0.393443	0.539474	0.104762	0.326316	0.166667	-0.0854701
0.343545	0.777778	0.891729	0.0582192	-0.219388	-0.266436	0.889831	-0.0502283	0.479167	0.485175	0.57116	0.168224	-0.194382	0.124199	2.67721	1.80374	1.08122	0.0461538	-0.0797101	0.224242	0.418033	0.368421	0.0857143	0.231579	0.0625	0.017094
0.298322	0.857984	0.892231	0.0410959	-0.244898	-0.318339	0.533898	-0.0684932	0.53125	0.46496	0.626332	0.200935	-0.201124	0.135249	2.73456	1.68692	1.19289	0.0769231	-0.0652174	0.163636	0.377049	0.552632	0.00952381	0.126316	0.145833	-0.034188
0.317287	0.898455	0.86416	0.0376712	-0.234694	-0.238754	0.5	-0.0799087	0.5	0.507412	0.611285	0.242991	-0.237079	0.110055	2.59265	1.92991	1.27411	-0.0153846	-0.076087	0.236364	0.377049	0.421053	0.00952381	0.326316	0.1875	0.025641
0.295405	0.863871	0.834085	0.0376712	-0.234694	-0.256055	0.466102	-0.0981735	0.442708	0.477763	0.490909	0.219626	-0.207865	0.158232	2.40147	1.86916	1.28426	-0.0153846	-0.152174	0.218182	0.405738	0.684211	-0.0857143	0.326316	0.135417	0.042735
0.33771	0.797645	0.807519	-0.0136986	-0.22449	-0.290657	0.525424	-0.107306	0.390625	0.483154	0.491536	0.126168	-0.225843	0.167514	2.45147	1.71028	1.28934	0.0615385	-0.15942	0.260606	0.418033	0.315789	-0.0571429	0.231579	0.15625	-0.034188
0.320934	0.778514	0.774937	0.0376712	-0.193878	-0.273356	0.627119	-0.118721	0.359375	0.454852	0.491536	0.135514	-0.182022	0.170166	2.47426	1.81776	1.16751	0.0153846	-0.144928	0.145455	0.336066	0.381579	0.00952381	0.315789	0.0104167	-0.162393
0.323851	0.805004	0.771429	0.0410959	-0.193878	-0.221453	0.635593	-0.06621	0.333333	0.485175	0.484639	0.088785	-0.226966	0.19337	2.57353	1.88785	1.20812	0.0307692	-0.0434783	0.109091	0.278689	0.223684	0.0666667	0.242105	0.0520833	0.042735
0.346462	0.848418	0.708271	0.0308219	-0.173469	-0.280277	0.5	-0.116438	0.34375	0.46496	0.444514	0.130841	-0.213483	0.178785	2.6125	1.72897	1.05076	0.0615385	-0.152174	0.109091	0.213115	0.526316	-0.0380952	0.0842105	0.21875	0.222222
0.342086	0.857248	0.694737	0.0445205	-0.244898	-0.273356	0.618644	-0.0525114	0.395833	0.456873	0.396238	0.11215	-0.2	0.199337	2.66838	1.64019	1.18274	-0.0307692	-0.177536	0.0484848	0.237705	0.407895	-0.0952381	0.0736842	0.15625	-0.017094
0.364697	0.863871	0.657644	0.0650685	-0.229592	-0.397924	0.720339	-0.0570776	0.265625	0.45283	0.42884	0.0934579	-0.210112	0.194475	2.64632	1.80374	1.15736	0.0307692	-0.173913	0.0909091	0.192623	0.25	0.0761905	0.294737	0.229167	-0.111111
0.360321	0.861663	0.610526	0.0547945	-0.178571	-0.359862	0.711864	-0.086758	0.244792	0.485849	0.430721	0.172897	-0.267416	0.187403	2.52868	1.7243	0.984772	0.0615385	-0.217391	0.0484848	0.184426	0.381579	0.12381	0.0210526	0.0625	-0.162393
0.342086	0.883738	0.609524	0.0376712	-0.209184	-0.3391	0.669492	-0.164384	0.322917	0.497305	0.364263	0.0233645	-0.231461	0.209503	2.57941	1.74299	1.13198	-0.0153846	-0.228261	0.157576	0.20082	0.263158	-0.047619	0.410526	0.0833333	-0.128205
0.342815	0.869757	0.621053	0.0547945	-0.158163	-0.217993	0.652542	-0.116438	0.208333	0.435984	0.38558	0.088785	-0.224719	0.22011	2.50662	1.60748	0.93401	0	-0.217391	0.212121	0.196721	0.289474	0.180952	0.252632	0.0104167	-0.0512821
0.341357	0.865342	0.651128	0.0239726	-0.153061	-0.384083	0.805085	-0.109589	0.348958	0.480458	0.347335	0.116822	-0.252809	0.214807	2.50147	1.50935	0.888325	-0.0307692	-0.152174	0.0484848	0.196721	0.276316	0.00952381	0.452632	0.0729167	-0.042735
0.327498	0.868285	0.659649	0.0171233	-0.147959	-0.394464	0.686441	-0.182648	0.354167	0.440701	0.456426	0.191589	-0.180899	0.145414	2.49779	1.52804	0.883249	0	-0.217391	0.0969697	0.17623	0.407895	0.0380952	0.263158	0.0729167	-0.102564
0.339898	0.864606	0.643108	0.0205479	-0.22449	-0.397924	0.720339	-0.127854	0.265625	0.452156	0.307837	0.0233645	-0.265169	0.161326	2.39338	1.44393	0.903553	0.0153846	-0.130435	0.0606061	0.204918	0.0263158	0.00952381	0.189474	0.208333	-0.145299
0.345733	0.845475	0.678697	-0.00684932	-0.178571	-0.373702	0.610169	-0.116438	0.270833	0.450135	0.339185	0.126168	-0.214607	0.177459	2.38529	1.46729	0.908629	0	-0.195652	0.0363636	0.233607	0.105263	0.047619	0.157895	0.0729167	-0.017094
0.339898	0.793966	0.67619	-0.0376712	-0.158163	-0.387543	-0.220339	-0.16895	0.291667	0.497305	0.299687	0.102804	-0.206742	0.16	2.25221	1.39252	0.736041	-0.0307692	-0.224638	0.0484848	0.196721	0.210526	-0.0571429	0.157895	0.03125	-0.0598291
0.323122	0.747609	0.690226	-0.0239726	-0.0867347	-0.346021	-0.355932	-0.105023	0.255208	0.490566	0.293417	0.0420561	-0.186517	0.134586	2.18382	1.53738	0.827411	-0.0153846	-0.163043	-0.0242424	0.192623	0.289474	0.0380952	0.231579	0	-0.0854701
0.32531	0.690213	0.706767	-0.0136986	-0.0765306	-0.418685	-0.0932203	-0.148402	0.260417	0.487871	0.331661	0.0794393	-0.188764	0.139006	2.09706	1.38318	0.928934	0	-0.148551	0.0181818	0.204918	0.118421	-0.0761905	-0.0421053	0.0104167	-0.0598291
0.317287	0.621781	0.637093	0.010274	-0.0765306	-0.380623	0	-0.123288	0.359375	0.487197	0.20627	0.121495	-0.180899	0.0925967	2.11471	1.33178	0.903553	0.0153846	-0.199275	0.030303	0.221311	0.184211	0.2	-0.0105263	0.03125	-0.042735
0.302699	0.584989	0.622556	-0.0239726	-0.0663265	-0.33564	-0.0254237	-0.0228311	0.359375	0.51752	0.240752	0.172897	-0.141573	0.0828729	2.04779	1.3972	0.71066	-0.0307692	-0.293478	0.115152	0.196721	0.381579	0	0.284211	0.0729167	0.111111
0.305616	0.50699	0.639599	-0.0821918	-0.0459184	-0.408305	-0.0847458	-0.0799087	0.296875	0.514151	0.19185	0.0747664	-0.132584	0.0528177	2.18162	1.42056	0.675127	-0.0153846	-0.195652	0.0727273	0.204918	0.236842	0.0571429	0.252632	0.15625	-0.042735
0.34938	0.479029	0.623058	-0.0650685	-0.0408163	-0.352941	0	-0.105023	0.296875	0.504043	0.210658	0.182243	-0.0808989	0.0205525	2.25	1.33645	0.624366	0	-0.217391	0.0181818	0.180328	0.197368	-0.0380952	0.136842	0.0104167	-0.0854701
0.309263	0.403974	0.609023	-0.0821918	-0.0306122	-0.363322	0.0338983	-0.130137	0.302083	0.493261	0.231348	0.0934579	-0.0775281	0.039779	2.30368	1.25701	0.639594	0.0307692	-0.235507	-0.0363636	0.237705	0.289474	0.00952381	0.0210526	0.135417	-0.179487
0.292487	0.362031	0.610025	-0.0787671	-0.0306122	-0.408305	0.118644	-0.16895	0.432292	0.516846	0.198119	0.163551	-0.123596	0.0236464	2.21544	1.41589	0.568528	0	-0.25	-0.0181818	0.192623	0.144737	0.0380952	0.2	0.0520833	-0.188034
0.285193	0.29507	0.606516	-0.0924658	0.0306122	-0.380623	-0.0762712	-0.13242	0.40625	0.485175	0.193103	0.088785	-0.0505618	0.0307182	2.30662	1.11682	0.664975	0.0153846	-0.253623	-0.0242424	0.221311	0.381579	-0.0380952	0.126316	0.177083	-0.034188
0.255288	0.225901	0.585464	-0.0582192	0.0510204	-0.356401	0.0932203	-0.114155	0.296875	0.526954	0.151724	0.0934579	-0.102247	0.0552486	2.30147	1.14953	0.573604	0.0461538	-0.23913	0.0242424	0.184426	0.5	0.133333	-0.0210526	0.09375	-0.0854701
0.237053	0.169242	0.530827	-0.0479452	0.0357143	-0.370242	-0.059322	-0.175799	0.317708	0.533693	0.1279	0.0700935	-0.111236	0.0727072	2.23456	1.24299	0.624366	0.0153846	-0.202899	-0.0545455	0.32377	0.144737	-0.00952381	0.0947368	-0.0208333	-0.213675
0.19256	0.130243	0.515288	-0.0993151	0.0204082	-0.425606	-0.0169492	-0.184932	0.260417	0.481132	0.105956	0.0841122	-0.162921	0.0468508	2.175	1.07944	0.649746	0	-0.318841	0.0181818	0.32377	0.157895	0.0666667	0.178947	0.0729167	-0.205128
0.175784	0.10596	0.562907	-0.0616438	0	-0.442907	-0.0169492	-0.0753425	0.260417	0.509434	0.162382	0.0747664	-0.216854	0.0693923	2.15294	0.995327	0.634518	-0.0615385	-0.286232	-0.030303	0.393443	0.184211	0.0285714	0.0421053	-0.0208333	-0.111111
0.153173	0.105224	0.584962	-0.0650685	0.0357143	-0.415225	0.101695	-0.155251	0.130208	0.502022	0.132915	0.102804	-0.216854	0.0643094	2.19485	1.1028	0.670051	-0.0153846	-0.192029	-0.0121212	0.397541	0.157895	-0.0380952	-0.0631579	0.0625	-0.153846
0.160467	0.101545	0.529825	-0.010274	0.0816327	-0.394464	0.101695	-0.164384	0.239583	0.486523	0.19373	0.0560748	-0.202247	0.0685083	2.15588	1.00935	0.609137	0.0153846	-0.206522	-0.0969697	0.430328	0.302632	0.0761905	0.105263	-0.0625	-0.222222
0.125456	0.0919794	0.520802	-0.0376712	0.0765306	-0.349481	-0.0254237	-0.0890411	0.182292	0.485849	0.166771	0.0607477	-0.223595	0.0267403	2.19926	0.934579	0.517766	-0.0307692	-0.282609	0	0.405738	0.565789	0.133333	-0.0210526	0.0104167	-0.017094
0.115244	0.101545	0.550376	-0.0616438	0.0969388	-0.401384	0.00847458	-0.118721	0.145833	0.457547	0.191223	0.0560748	-0.208989	0.0267403	2.08015	0.841121	0.649746	0.0153846	-0.228261	-0.0848485	0.409836	0.328947	0.12381	-0.0631579	0	-0.102564
0.102845	0.12362	0.532331	-0.0308219	0.0357143	-0.397924	0.127119	-0.114155	0.229167	0.395553	0.229467	0.116822	-0.155056	0.0313812	2.06397	0.925234	0.461929	0.0615385	-0.246377	-0.0484848	0.467213	0.105263	-0.0190476	0.0526316	-0.15625	-0.0683761
0.0970095	0.137601	0.490226	-0.0376712	0.0663265	-0.356401	0.059322	-0.130137	0.192708	0.417116	0.207524	0.0186916	-0.153933	0.0309392	1.90368	0.82243	0.482233	-0.0153846	-0.307971	-0.0545455	0.479508	0.315789	0.0190476	0.0210526	0	-0.17094
0.0853392	0.157469	0.492231	-0.010274	0.0153061	-0.33218	0.0338983	-0.0981735	0.161458	0.46159	0.228213	0.14486	-0.0573034	0.00883978	1.90074	0.864486	0.517766	-0.0307692	-0.173913	0.0606061	0.471311	0.144737	0.0666667	0.0631579	0.0104167	0.017094
0.0780452	0.169978	0.420551	-0.0205479	-0.0255102	-0.307958	0.0932203	-0.0821918	0.119792	0.466981	0.209404	0.0327103	-0.0595506	0.0172376	1.86029	0.920561	0.48731	0.0153846	-0.300725	-0.0121212	0.372951	0.144737	0.0571429	-0.0210526	0.135417	-0.111111
0.0816922	0.172185	0.433584	-0.0205479	0.0510204	-0.394464	0.0338983	-0.121005	0.145833	0.41779	0.142947	0.0233645	-0.0640449	-0.0556906	1.77941	0.88785	0.538071	0.0615385	-0.210145	-0.0666667	0.360656	0.144737	0.12381	-0.0105263	0.0625	-0.128205
0.0773158	0.1766	0.473684	-0.0479452	-0.0102041	-0.352941	-0.0847458	-0.0639269	0.15625	0.466307	0.20815	0.0140187	-0.00898876	-0.0320442	1.71103	0.88785	0.502538	-0.0461538	-0.23913	-0.115152	0.336066	0.171053	0.0666667	-0.157895	-0.0104167	-0.102564
0.0634573	0.181751	0.404511	-0.0958904	0.0102041	-0.415225	0.0423729	-0.109589	0.0833333	0.481132	0.23511	-0.0046729	-0.0269663	-0.0651934	1.7	0.775701	0.431472	-0.0307692	-0.26087	-0.169697	0.393443	0.184211	0.142857	0.0105263	0.0104167	-0.153846
0.0671043	0.18543	0.407519	-0.0684932	0.0153061	-0.391003	-0.0338983	-0.139269	0.09375	0.514825	0.186207	0.0607477	0.0325843	-0.0682873	1.67794	0.845794	0.51269	0.0153846	-0.217391	-0.0787879	0.307377	0.381579	0.00952381	0.0947368	0.229167	-0.136752
0.079504	0.183223	0.42406	-0.0924658	0.0153061	-0.359862	-0.0762712	-0.257991	0.0572917	0.488544	0.062069	0.0233645	0.0280899	-0.0437569	1.625	0.738318	0.467005	-0.0461538	-0.235507	-0.0909091	0.29918	0.236842	0.00952381	0.0842105	-0.0520833	-0.111111
0.055434	0.204562	0.428571	-0.119863	0.0255102	-0.422145	0.0932203	-0.100457	0.203125	0.53841	0.0934169	-0.046729	0.0359551	-0.0269613	1.67647	0.82243	0.370558	-0.0307692	-0.333333	-0.133333	0.286885	0.118421	0.12381	-0.0421053	0.0625	-0.196581
0.0634573	0.209713	0.413534	-0.140411	-0.0306122	-0.439446	0.110169	-0.0799087	0.234375	0.548518	0.141066	-0.0327103	0.0808989	-0.0358011	1.58971	0.817757	0.42132	-0.0153846	-0.297101	-0.0242424	0.303279	0.0921053	0.142857	-0.0315789	-0.0625	-0.136752
0.0736689	0.216336	0.399499	-0.113014	-0.0357143	-0.363322	0.0508475	-0.0799087	0.03125	0.640836	0.181818	-0.0373832	0.106742	-0.0623204	1.49632	0.929907	0.558376	0.0307692	-0.376812	-0.0242424	0.282787	0.236842	0.0571429	0.0421053	0	-0.162393
0.0357403	0.238411	0.372431	-0.126712	-0.0510204	-0.384083	0.152542	-0.0707763	0.0520833	0.688005	0.133542	0.0046729	0.0573034	-0.038674	1.45735	0.836449	0.411168	0.0153846	-0.293478	-0.157576	0.286885	0.157895	0	0.136842	-0.0729167	-0.188034
0.0459519	0.248712	0.33183	-0.140411	-0.0459184	-0.314879	0.110169	-0.0525114	0.119792	0.725067	0.140439	0.00934579	0.11236	-0.0506077	1.42941	0.836449	0.360406	0.0153846	-0.311594	-0.0909091	0.311475	0.118421	-0.0380952	0.0526316	-0.0104167	-0.0854701
0.0700219	0.272995	0.331328	-0.157534	-0.0510204	-0.356401	0.059322	0.0022831	0.0625	0.774259	0.140439	0	0.141573	-0.0612155	1.42059	0.878505	0.451777	0.138462	-0.289855	-0.206061	0.25	0.0263158	0.0571429	-0.0105263	-0.09375	-0.162393
0.0627279	0.271523	0.326316	-0.195205	-0.0765306	-0.370242	0.118644	-0.043379	-0.0364583	0.811995	0.122884	-0.046729	0.0494382	-0.0625414	1.4	0.878505	0.380711	0.0153846	-0.300725	-0.10303	0.217213	0	-0.047619	-0.0315789	-0.0104167	-0.153846
0.0765864	0.275938	0.333333	-0.202055	-0.0306122	-0.356401	0.0932203	0.043379	0.0364583	0.84434	0.104702	-0.0841122	0.058427	-0.0729282	1.33676	0.747664	0.482233	0.0307692	-0.32971	-0.10303	0.29918	0.118421	-0.0666667	-0.0210526	-0.104167	-0.213675
0.0780452	0.296542	0.346366	-0.150685	-0.0102041	-0.287197	0.0254237	0.205479	0.0260417	0.842992	0.0833856	-0.0514019	0.110112	-0.0707182	1.32794	0.827103	0.360406	-0.0307692	-0.271739	-0.10303	0.184426	0.171053	0.0666667	-0.0315789	0.0104167	-0.179487
0.103574	0.298749	0.322807	-0.208904	-0.0765306	-0.283737	0.161017	0.212329	0.015625	0.880054	0.105956	-0.0654206	0.094382	-0.116906	1.28529	0.728972	0.385787	0	-0.293478	-0.127273	0.22541	0.171053	0	-0.0105263	0.0729167	-0.153846
0.0875273	0.31273	0.330326	-0.195205	-0.0867347	-0.280277	0.220339	0.305936	-0.078125	0.886119	0.0871473	0.0841122	0.104494	-0.120442	1.24632	0.766355	0.426396	-0.0153846	-0.293478	-0.0787879	0.184426	0.0921053	-0.104762	-0.136842	-0.0416667	0.025641
0.0743982	0.31273	0.313283	-0.208904	-0.0765306	-0.249135	0	0.399543	-0.0677083	0.851078	0.0758621	-0.0046729	0.0516854	-0.130608	1.20735	0.588785	0.380711	0.0461538	-0.304348	-0.0969697	0.217213	-0.0263158	0.047619	0.0210526	0.0729167	-0.128205
0.0342815	0.331862	0.316792	-0.202055	-0.102041	-0.290657	0.0762712	0.383562	0.0989583	0.902291	0.0564263	-0.0140187	0.0146067	-0.149613	1.24412	0.635514	0.329949	0	-0.32971	-0.030303	0.196721	0.0526316	-0.0190476	0.0315789	-0.0833333	-0.136752
0.051787	0.345843	0.279198	-0.219178	-0.0918367	-0.228374	-0.00847458	0.506849	-0.0364583	0.87062	0.0815047	-0.0327103	0.0494382	-0.152928	1.18603	0.686916	0.340102	0.0153846	-0.355072	-0.10303	0.229508	0.0263158	-0.00952381	0.0842105	-0.0208333	-0.0598291
0.0576222	0.34805	0.275689	-0.236301	-0.0816327	-0.363322	0.101695	0.449772	-0.0208333	0.935984	0.0990596	-0.0607477	0.0325843	-0.192265	1.16471	0.621495	0.304569	0.0307692	-0.333333	0.0242424	0.168033	0.0657895	0.0571429	-0.0842105	0.0104167	-0.188034
0.0306346	0.353201	0.284211	-0.287671	-0.142857	-0.290657	0.0847458	0.506849	-0.0260417	0.955526	0.0338558	-0.0560748	0.0393258	-0.17326	1.15	0.630841	0.28934	0	-0.351449	-0.0969697	0.114754	0.0657895	-0.0285714	0.242105	-0.0625	-0.128205
0.0605398	0.376012	0.254637	-0.246575	-0.112245	-0.307958	0.127119	0.440639	-0.0416667	0.903639	0.0507837	-0.149533	-0.0808989	-0.184972	1.15956	0.551402	0.309645	-0.0615385	-0.336957	-0.0727273	0.151639	0.197368	0.12381	-0.0210526	0.0520833	-0.0598291
0.027717	0.389257	0.278196	-0.212329	-0.153061	-0.342561	0.169492	0.43379	-0.0729167	0.942048	0.0821317	-0.0233645	-0.052809	-0.171934	1.15074	0.593458	0.329949	-0.0153846	-0.391304	-0.115152	0.168033	0.223684	-0.114286	0.0947368	0.177083	-0.213675
0.0255288	0.419426	0.308772	-0.253425	-0.183673	-0.280277	0.0932203	0.369863	0.0364583	0.855121	0.0683386	-0.0280374	-0.117978	-0.174365	1.11471	0.504673	0.294416	0.0769231	-0.289855	-0.109091	0.155738	-0.0526316	-0.0666667	-0.0210526	0.114583	-0.102564
0.0299052	0.469463	0.353885	-0.297945	-0.132653	-0.349481	0.186441	0.3379	0.0520833	0.837601	0.0106583	-0.0327103	-0.0573034	-0.165083	1.12059	0.509346	0.324873	0.0307692	-0.373188	-0.0848485	0.127049	-0.0394737	-0.180952	0.0736842	-0.0520833	-0.128205
0.0320934	0.445916	0.310777	-0.291096	-0.163265	-0.380623	0.127119	0.365297	0	0.848383	-0.0583072	-0.154206	-0.144944	-0.156685	1.03971	0.443925	0.274112	0.0615385	-0.365942	-0.109091	0.155738	-0.0131579	-0.0761905	0.0631579	-0.0729167	-0.0512821
0.0386579	0.488595	0.294236	-0.284247	-0.137755	-0.32526	0.110169	0.360731	0.114583	0.793801	0.00815047	-0.0607477	-0.173034	-0.167293	1.06471	0.434579	0.324873	0.0307692	-0.362319	-0.0606061	0.102459	0.131579	-0.0952381	0.0842105	0.0104167	-0.025641
0.031364	0.505519	0.247619	-0.304795	-0.193878	-0.363322	0.271186	0.347032	0.015625	0.791105	-0.0294671	-0.0981308	-0.162921	-0.16663	1.02132	0.38785	0.385787	0.0461538	-0.384058	-0.127273	0.0655738	-0.0657895	-0.0380952	-0.0210526	0.15625	-0.111111
0.031364	0.487859	0.301253	-0.297945	-0.229592	-0.3391	0.279661	0.267123	0.197917	0.828167	-0.0852665	-0.0140187	-0.144944	-0.175028	1.00662	0.490654	0.284264	0.0307692	-0.347826	-0.206061	0.0327869	0.0394737	0.104762	0.0315789	-0.03125	-0.17094
0.02407	0.479765	0.316792	-0.294521	-0.219388	-0.387543	0.29661	0.26484	0.0572917	0.783693	-0.0432602	-0.116822	-0.177528	-0.192707	1.01765	0.490654	0.294416	0.123077	-0.275362	-0.10303	0.0368852	0.197368	-0.0285714	-0.157895	-0.0104167	-0.102564
0.0335522	0.512141	0.301253	-0.291096	-0.193878	-0.373702	0.279661	0.283105	0.119792	0.755391	-0.137931	-0.11215	-0.197753	-0.167293	0.966912	0.378505	0.253807	0.0615385	-0.358696	-0.224242	0.0163934	0.144737	0.0761905	0.0105263	-0.03125	-0.00854701
0.027717	0.548197	0.307769	-0.25	-0.260204	-0.273356	0.288136	0.239726	0.109375	0.729111	-0.132915	-0.0934579	-0.222472	-0.179227	0.950735	0.462617	0.385787	0.0615385	-0.394928	-0.187879	0.0163934	0	-0.0380952	0.105263	-0.0833333	-0.17094
0.02407	0.552612	0.337343	-0.256849	-0.25	-0.32872	0.415254	0.23516	0.015625	0.679919	-0.157367	-0.107477	-0.22809	-0.190055	0.975	0.476636	0.299492	0.0461538	-0.413043	-0.2	0.0327869	0.197368	-0.00952381	-0.0421053	0.03125	-0.145299
0.0131291	0.526122	0.274687	-0.263699	-0.22449	-0.207612	0.355932	0.253425	0.119792	0.700135	-0.169279	-0.107477	-0.186517	-0.192044	0.972794	0.32243	0.324873	0.0307692	-0.34058	-0.133333	0	0.105263	0.142857	0	0.03125	-0.247863
0.0196937	0.521707	0.285714	-0.195205	-0.234694	-0.262976	0.398305	0.210046	0.171875	0.641509	-0.17931	-0.0700935	-0.252809	-0.195138	1.01176	0.392523	0.274112	0.0461538	-0.351449	-0.2	0.057377	0.0394737	0.142857	-0.0736842	-0.104167	-0.162393
-0.00656455	0.506255	0.291228	-0.219178	-0.214286	-0.186851	0.313559	0.194064	0.1875	0.657008	-0.197492	-0.0794393	-0.233708	-0.187182	0.921324	0.406542	0.15736	0.107692	-0.391304	-0.0424242	-0.00409836	-0.0657895	0.0285714	-0.0210526	-0.0625	-0.17094
0.00145879	0.476821	0.321805	-0.181507	-0.22449	-0.283737	0.347458	0.127854	0.182292	0.646226	-0.175549	-0.11215	-0.224719	-0.180552	0.929412	0.383178	0.167513	0.0615385	-0.402174	-0.206061	0.00409836	0.0131579	-0.142857	-0.0947368	0.145833	-0.0940171
-0.00218818	0.447388	0.304261	-0.208904	-0.193878	-0.256055	0.40678	0.210046	0.0989583	0.597035	-0.135423	-0.0981308	-0.269663	-0.187403	0.877206	0.383178	0.243655	0.0461538	-0.413043	-0.121212	0	0.157895	0.114286	-0.105263	-0.0729167	-0.230769
0.0160467	0.45401	0.307268	-0.202055	-0.193878	-0.228374	0.228814	0.164384	0.255208	0.61186	-0.125392	-0.214953	-0.226966	-0.169282	0.897059	0.457944	0.213198	0.0923077	-0.434783	-0.133333	-0.0245902	-0.0657895	0	0.0842105	-0.0729167	-0.188034
0.00583516	0.42752	0.33584	-0.202055	-0.22449	-0.273356	0.194915	0.141553	0.25	0.557278	-0.186834	-0.149533	-0.264045	-0.184309	0.926471	0.425234	0.319797	0.0153846	-0.449275	-0.2	-0.0614754	0	-0.161905	0.0526316	-0.0520833	-0.119658
0.027717	0.409124	0.305764	-0.253425	-0.168367	-0.207612	0.423729	0.200913	0.161458	0.606469	-0.175549	-0.172897	-0.239326	-0.189171	0.983088	0.439252	0.284264	0.138462	-0.40942	-0.193939	-0.0245902	0.210526	-0.0761905	-0.0736842	-0.135417	-0.128205
0.0459519	0.396615	0.337343	-0.284247	-0.193878	-0.245675	0.177966	0.280822	0.177083	0.597035	-0.15047	-0.182243	-0.238202	-0.214365	1.04412	0.411215	0.121827	0.0923077	-0.344203	-0.181818	-0.00409836	-0.0921053	-0.0666667	0.0526316	-0.125	-0.213675
0.086798	0.407653	0.336842	-0.25	-0.117347	-0.242215	0.161017	0.212329	0.161458	0.589623	-0.134169	-0.126168	-0.241573	-0.201989	1.07353	0.509346	0.309645	0.0769231	-0.42029	-0.260606	-0.0286885	0.263158	-0.0666667	-0.0736842	-0.0416667	-0.128205
0.104303	0.402502	0.301253	-0.256849	-0.112245	-0.231834	0.262712	0.216895	0.145833	0.555256	-0.0952978	-0.168224	-0.283146	-0.210829	1.12574	0.457944	0.294416	0.0923077	-0.380435	-0.345455	-0.00819672	0	0.152381	-0.0210526	-0.114583	-0.196581
0.126185	0.400294	0.299749	-0.277397	-0.0969388	-0.301038	0.245763	0.239726	0.177083	0.541105	-0.0708464	-0.0700935	-0.297753	-0.225856	1.19118	0.504673	0.304569	0.107692	-0.369565	-0.157576	-0.0532787	0	-0.180952	-0.0736842	-0.0208333	-0.247863
0.121809	0.406917	0.321303	-0.267123	-0.137755	-0.294118	0.262712	0.262557	0.145833	0.524933	-0.100313	-0.0981308	-0.333708	-0.231823	1.14412	0.429907	0.299492	-0.0153846	-0.387681	-0.284848	-0.0286885	0.0657895	0.00952381	-0.115789	-0.09375	-0.111111
0.125456	0.433407	0.277694	-0.236301	-0.158163	-0.304498	0.305085	0.226027	0.203125	0.475741	-0.0275862	-0.0560748	-0.329213	-0.230276	0.919853	0.453271	0.243655	0.0615385	-0.380435	-0.309091	-0.0204918	0.0526316	0.0666667	0	-0.135417	-0.264957
0.133479	0.424577	0.317293	-0.277397	-0.102041	-0.342561	0.271186	0.276256	0.145833	0.458895	-0.062069	-0.14486	-0.306742	-0.279779	0.799265	0.406542	0.218274	0.0769231	-0.391304	-0.406061	-0.0737705	0	0.0190476	0.105263	-0.0416667	-0.205128
0.140044	0.426784	0.304762	-0.267123	-0.122449	-0.352941	0.194915	0.210046	0.197917	0.41779	-0.0752351	-0.0654206	-0.31573	-0.280221	0.819853	0.392523	0.137056	0.0461538	-0.355072	-0.381818	-0.057377	-0.105263	-0.047619	-0.0842105	-0.09375	-0.0940171
0.153902	0.431935	0.336842	-0.236301	-0.0918367	-0.359862	0.127119	0.244292	0.0885417	0.438679	0.0294671	-0.116822	-0.295506	-0.281547	0.831618	0.411215	0.203046	0.0307692	-0.402174	-0.369697	-0.0286885	0.0394737	-0.047619	-0.0526316	-0.125	-0.247863
0.123268	0.428992	0.300752	-0.260274	-0.142857	-0.356401	0.228814	0.242009	0.0885417	0.442722	-0.0489028	-0.102804	-0.289888	-0.294807	0.761029	0.331776	0.177665	-0.0153846	-0.365942	-0.466667	-0.057377	0.0789474	-0.00952381	0.0210526	-0.114583	-0.179487
0.163384	0.438558	0.296742	-0.253425	-0.0255102	-0.384083	0.144068	0.210046	0.140625	0.413073	-0.0470219	-0.107477	-0.307865	-0.337901	0.780147	0.341121	0.121827	0.0615385	-0.416667	-0.339394	-0.0819672	-0.0921053	-0.190476	-0.0421053	0	-0.119658
0.148796	0.455482	0.312281	-0.239726	-0.0612245	-0.342561	0.0762712	0.214612	0.260417	0.41442	-0.0438871	-0.00934579	-0.349438	-0.371713	0.8	0.439252	0.192893	0.107692	-0.293478	-0.424242	-0.102459	0.0921053	0.0380952	0.0526316	-0.0416667	-0.179487
0.137856	0.474614	0.3198	-0.25	-0.0459184	-0.33218	0.0169492	0.16895	0.140625	0.447439	-0.0369906	-0.0841122	-0.334831	-0.379889	0.775735	0.528037	0.116751	0.0923077	-0.318841	-0.448485	-0.0860656	0.236842	0.114286	0.0210526	-0.145833	-0.128205
0.118162	0.500368	0.274687	-0.229452	-0.0510204	-0.411765	0.127119	0.136986	0.135417	0.415094	-0.0482759	-0.102804	-0.348315	-0.407514	0.747059	0.350467	0.0152284	0.0307692	-0.34058	-0.478788	-0.0901639	0.0657895	0.133333	-0.147368	-0.0729167	-0.0940171
0.122538	0.520971	0.215539	-0.243151	-0.0765306	-0.449827	0.245763	0.123288	0.208333	0.453504	-0.046395	-0.116822	-0.333708	-0.442873	0.716176	0.523364	0.0507614	0.0769231	-0.347826	-0.436364	-0.0614754	-0.0131579	-0.0285714	0.0105263	-0.0208333	-0.17094
0.0991977	0.529065	0.203008	-0.267123	0.00510204	-0.359862	0.161017	0.0981735	0.1875	0.427224	-0.0714734	-0.0934579	-0.311236	-0.463204	0.735294	0.378505	0.0304569	0.0769231	-0.26087	-0.381818	-0.0942623	-0.0394737	-0.0761905	-0.0526316	-0.135417	-0.128205
0.102845	0.518028	0.166917	-0.284247	0.0459184	-0.377163	0.161017	0.178082	0.0729167	0.423181	-0.0658307	-0.0327103	-0.31573	-0.46453	0.709559	0.420561	0.0964467	0.0769231	-0.26087	-0.436364	-0.0983607	-0.0131579	-0.047619	0	-0.135417	-0.239316
0.0955507	0.545254	0.129825	-0.260274	0.0255102	-0.401384	0.144068	0.127854	0.140625	0.413747	-0.00815047	-0.135514	-0.283146	-0.471381	0.716912	0.303738	0.035533	0.123077	-0.322464	-0.442424	-0.0819672	0.0131579	0.0857143	-0.136842	-0.197917	-0.205128
0.0525164	0.554084	0.121805	-0.263699	0.0459184	-0.429066	0.135593	0.116438	0.223958	0.416442	-0.00188088	-0.14486	-0.28427	-0.472044	0.721324	0.317757	-0.00507614	0	-0.351449	-0.412121	-0.0901639	0.144737	-0.0952381	0.136842	-0.125	-0.017094
0.0525164	0.571744	0.0781955	-0.308219	0.0561224	-0.435986	0.0677966	0.200913	0.135417	0.399596	-0.0194357	-0.0560748	-0.276405	-0.481989	0.765441	0.476636	0.0203046	0.0153846	-0.286232	-0.436364	-0.0819672	0.0921053	0.0571429	-0.0105263	-0.03125	-0.025641
0.0262582	0.608536	0.0546366	-0.297945	0.0663265	-0.387543	0.0423729	0.105023	0.197917	0.386792	0.00125392	-0.149533	-0.288764	-0.487735	0.898529	0.378505	0.137056	0.0769231	-0.351449	-0.436364	-0.102459	0.118421	0.047619	-0.0631579	-0.125	-0.205128
-0.00583516	0.622517	0.0546366	-0.297945	0.0612245	-0.32526	0.0169492	0.0388128	0.25	0.398922	0.0796238	-0.0747664	-0.260674	-0.487293	0.998529	0.401869	0.101523	0.0307692	-0.304348	-0.424242	-0.106557	0.157895	-0.104762	-0.0421053	0.03125	-0.196581
-0.00145879	0.638705	0.0796992	-0.304795	0.0765306	-0.342561	0.211864	0	0.0833333	0.365229	0.0282132	-0.0654206	-0.267416	-0.483094	1.17721	0.401869	0.137056	0.123077	-0.271739	-0.442424	-0.0860656	0	-0.104762	0.0526316	0.125	-0.179487
-0.00583516	0.640912	0.0701754	-0.325342	0.0561224	-0.370242	0.169492	-0.0182648	0.1875	0.348383	0.154232	-0.158879	-0.31573	-0.485304	1.10074	0.359813	0.0761421	0.107692	-0.318841	-0.418182	-0.163934	0.0921053	-0.047619	-0.0947368	-0.09375	-0.145299
-0.0415755	0.636497	0.0140351	-0.315068	0.107143	-0.404844	0	0.0296804	0.307292	0.342318	0.145455	-0.172897	-0.306742	-0.503204	1.12206	0.397196	0.0812183	0.0461538	-0.394928	-0.424242	-0.139344	0.0921053	0.047619	-0.0842105	-0.0208333	-0.0940171
-0.0437637	0.656365	0.00601504	-0.294521	0.0867347	-0.33218	0.177966	-0.0228311	0.270833	0.303234	0.169906	-0.0654206	-0.295506	-0.501436	0.919853	0.359813	0.0456853	0.0307692	-0.235507	-0.442424	-0.131148	-0.144737	-0.0761905	0	0.0416667	-0.0683761
-0.0357403	0.640177	-0.0135338	-0.304795	0.0765306	-0.415225	0.0169492	0.0182648	0.130208	0.309973	0.258307	-0.172897	-0.294382	-0.509613	0.733824	0.443925	0.121827	0.0923077	-0.315217	-0.406061	-0.163934	-0.0263158	-0.0190476	-0.0210526	-0.125	-0.162393
-0.0671043	0.642384	-0.0255639	-0.291096	0.0663265	-0.425606	0.186441	0.0890411	0.203125	0.309299	0.266458	-0.116822	-0.293258	-0.513812	0.588971	0.350467	0.121827	0.0461538	-0.242754	-0.466667	-0.155738	0.0394737	-0.0190476	0.0736842	-0.0520833	-0.247863
-0.0649161	0.636497	-0.0320802	-0.287671	0.0561224	-0.411765	0.0762712	0.0182648	0.286458	0.292453	0.262696	-0.126168	-0.266292	-0.506961	0.575735	0.35514	-0.0152284	0.0615385	-0.293478	-0.460606	-0.106557	-0.0657895	-0.0190476	-0.231579	-0.0520833	-0.188034
-0.0736689	0.639441	-0.0370927	-0.318493	0.0561224	-0.411765	0	-0.0228311	0.104167	0.308625	0.418182	-0.135514	-0.283146	-0.509392	0.533824	0.341121	0.0507614	0.0461538	-0.322464	-0.393939	-0.147541	-0.118421	-0.0380952	0.136842	-0.0625	-0.153846
-0.0991977	0.614422	-0.0260652	-0.294521	0.0765306	-0.401384	0	-0.0753425	0.140625	0.297844	0.35047	-0.11215	-0.274157	-0.50674	0.511765	0.38785	0.0761421	0.0307692	-0.307971	-0.412121	-0.147541	0.0263158	-0.0952381	0.0526316	-0.145833	-0.222222
-0.107221	0.618837	-0.0340852	-0.304795	0.107143	-0.418685	0.0423729	-0.043379	0.192708	0.282345	0.462069	-0.186916	-0.285393	-0.50674	0.486029	0.38785	0.0862944	0.0461538	-0.32971	-0.4	-0.143443	0.105263	0.142857	-0.0421053	0.0833333	-0.102564
-0.125456	0.614422	-0.0696742	-0.277397	0.0867347	-0.411765	0.0169492	-0.0981735	0.15625	0.262803	0.510972	-0.0654206	-0.316854	-0.514033	0.436765	0.481308	0.0304569	0.0307692	-0.242754	-0.454545	-0.168033	-0.0394737	-0.0857143	0.242105	-0.125	-0.0854701
-0.138585	0.615158	-0.0681704	-0.280822	0.0408163	-0.349481	0.0254237	-0.0730594	0.15625	0.225741	0.459561	-0.224299	-0.326966	-0.48663	0.477206	0.415888	0.0812183	0.0307692	-0.235507	-0.454545	-0.168033	-0.0657895	0.0666667	-0.0315789	-0.0625	-0.025641
-0.140044	0.592347	-0.0556391	-0.308219	0.0663265	-0.356401	-0.059322	-0.0182648	0.213542	0.157682	0.430094	-0.238318	-0.323595	-0.480221	0.411765	0.401869	0.0609137	0.0153846	-0.224638	-0.442424	-0.20082	0.118421	0.0285714	0.105263	-0.0104167	-0.17094

## Sheet: crowded-opposite
18.4.2024							22.04.2024
worrm1	worm3	worm5	worm6	worm8	worm11		worm2	worm3		worm4	worm5
video2-p	video6-	video11	video13	video17	video24-a	video25-p	video7	video11	video12-p	video15	video19-p
-1	-1	-1	-1	-1	-1	-1	-1	-1	-1	-1	-1
0.144144	0.358846	0.210526	0.352715	0.347518	0.14375	-0.121622	0.193434	0.151261	0.111111	0.0107527	0.0879121
0.159159	0.313258	0.325359	0.252599	0.295508	0.2375	-0.0810811	0.192929	0.176471	0.111111	-0.0322581	0.010989
0.27027	0.253032	0.258373	0.214093	0.231678	0.175	0.0135135	0.0838384	0.201681	0	-0.0967742	-0.0989011
0.222222	0.215809	0.133971	0.177513	0.262411	0.15625	-0.0405405	0.0843434	0.184874	0.0683761	-0.0537634	-0.010989
0.327327	0.16353	0.15311	0.141702	0.1513	0.20625	0.0135135	0.0636364	0.109244	0.0854701	-0.0107527	0.164835
0.426426	0.150565	0.138756	0.111667	0.153664	0.23125	0	0.0808081	0.092437	0.0940171	-0.0107527	0.032967
0.396396	0.116269	0.0861244	0.0843281	0.125296	0.175	-0.0405405	0.0277778	0.134454	0.179487	0.0215054	0.043956
0.432432	0.103722	0.138756	0.0573739	0.163121	0.0875	-0.0675676	-0.0535354	0.0336134	0.0940171	0.0860215	-0.010989
0.459459	0.0869929	0.229665	0.0716211	0.255319	0.10625	0	-0.0737374	0.12605	0.145299	0.0645161	0
0.510511	0.0786282	0.258373	0.0496727	0.191489	0.04375	-0.0540541	-0.167677	0.10084	0.111111	0.0215054	-0.10989
0.54955	0.0945211	0.200957	0.0400462	0.231678	0.0875	0	-0.25101	0.117647	0.282051	0.129032	0.0549451
0.540541	0.0690088	0.138756	0	0.186761	0.0125	0.108108	-0.283838	0.176471	0.188034	-0.0752688	0.0659341
0.693694	0.01422	0.15311	0.0161725	0.189125	0.0375	0	-0.281313	0.201681	-0.00854701	-0.139785	-0.021978
0.552553	-0.0209118	0.162679	-0.00693107	0.182033	-0.0125	0	-0.29899	0.0420168	0.0512821	-0.0537634	-0.0769231
0.543544	-0.0535341	0.143541	0.0157874	0.231678	-0.0125	-0.0405405	-0.288889	0.0252101	0.205128	-0.107527	-0.131868
0.618619	-0.0648264	0.100478	0.0165576	0.198582	0.10625	0.0135135	-0.261111	0.0420168	0.153846	-0.0430108	0.142857
0.612613	-0.0828105	0.157895	0.00038506	0.122931	0.16875	0.0405405	-0.271212	0.0336134	0.0512821	-0.129032	0.032967
0.507508	-0.0698453	0.148325	-0.0281094	0.186761	0.01875	0.0540541	-0.215152	-0.0168067	0.119658	0.0537634	-0.021978
0.570571	-0.0698453	0.181818	-0.0184829	0.13948	0.08125	0.0135135	-0.232323	0.0588235	0.0940171	-0.0860215	0.186813
0.522523	-0.0614806	0.138756	-0.0219484	0.172577	-0.08125	0	-0.249495	0.0588235	0.034188	-0.193548	0.021978
0.498498	-0.0803011	0.239234	-0.00770119	0.21513	-0.05	0.027027	-0.261111	-0.0168067	0.0769231	-0.0967742	0.021978
0.537538	-0.0823923	0.196172	-0.00500578	0.210402	0.06875	0	-0.29495	0.0756303	0.162393	-0.0967742	-0.0549451
0.543544	-0.0878294	0.344498	0.0103966	0.250591	0.01875	0.0135135	-0.238889	0.00840336	0.119658	0.0645161	-0.0879121
0.57958	-0.0773735	0.105263	0	0.224586	-0.01875	-0.0405405	-0.280808	0.00840336	0.17094	-0.0107527	-0.043956
0.414414	-0.0690088	0.272727	-0.00693107	0.210402	0.15	-0.0405405	-0.24899	0.109244	0.128205	0.107527	-0.010989
0.444444	-0.0464241	0.105263	-0.0223335	0.288416	0.11875	0.027027	-0.249495	0.0420168	0.179487	0.0322581	0.032967
0.396396	-0.0652447	0.210526	-0.03196	0.174941	0.05	-0.0405405	-0.25	-0.0168067	0.179487	-0.0752688	0.0549451
0.396396	-0.0342953	0.0669856	-0.0373508	0.222222	0.05	0	-0.275758	-0.0336134	0	-0.0430108	-0.0879121
0.285285	-0.0543706	0.0909091	-0.0408163	0.264775	0.04375	-0.0135135	-0.255051	-0.00840336	0.111111	-0.139785	-0.043956
0.357357	-0.0455876	0.191388	-0.0435117	0.243499	-0.04375	-0.0810811	-0.220202	-0.0840336	0.162393	0.0215054	-0.043956
0.321321	-0.0296947	0.0861244	-0.0677705	0.167849	0.03125	-0.0810811	-0.261616	-0.00840336	0.0598291	-0.215054	0
0.345345	-0.0209118	0.148325	-0.0685406	0.115839	-0.075	-0.135135	-0.225253	-0.0420168	0.0598291	0.0430108	0.153846
0.279279	-0.0133835	0.0813397	-0.0311898	0.12766	-0.1	-0.027027	-0.243434	0.0840336	0.0940171	-0.0860215	-0.021978
0.165165	0.00961941	-0.0717703	-0.0512129	0.115839	-0.0375	-0.027027	-0.249495	-0.10084	0.119658	-0.0860215	-0.032967
0.201201	0.0108741	-0.124402	-0.0373508	0.120567	0.03125	-0.0810811	-0.229293	-0.0252101	-0.0598291	0.0107527	0.0879121
0.132132	0.0430782	-0.0191388	-0.0200231	0.070922	0.01875	-0.0675676	-0.24596	-0.0336134	0.188034	-0.0645161	0.175824
0.123123	0.0631535	-0.110048	0.00693107	0.070922	0.0375	-0.135135	-0.260606	0.0504202	0.0512821	-0.150538	-0.10989
0.135135	0.0652447	-0.114833	-0.0142472	0.106383	-0.0625	-0.0135135	-0.217677	0.10084	0.0940171	0.129032	-0.0989011
0.0690691	0.0719364	0.00478469	-0.0204082	0.0851064	-0.01875	-0.0675676	-0.213131	0.0168067	-0.034188	-0.139785	-0.0989011
0.144144	0.0489335	0.0143541	-0.0327301	0.0614657	-0.0375	-0.0810811	-0.233333	-0.00840336	0.0940171	0.0215054	0.0769231
0.108108	0.0100376	0.157895	-0.0142472	0.0236407	-0.0625	-0.027027	-0.197475	0.0588235	-0.00854701	0.129032	-0.0659341
0.0750751	0.00543706	-0.0909091	-0.0415864	0.0591017	-0.05	-0.0540541	-0.214141	0.0840336	0.179487	-0.0322581	-0.208791
0.0720721	0	-0.0909091	-0.0134771	0.0661939	-0.1	-0.121622	-0.192929	-0.109244	0.0598291	-0.107527	0
0.0750751	-0.019657	-0.0574163	-0.00731613	0.0212766	0.05	-0.0135135	-0.173232	0.0420168	-0.025641	0.139785	-0.032967
0.111111	-0.00292765	-0.0430622	0.0227185	-0.0141844	-0.10625	-0.027027	-0.0747475	-0.0252101	-0.034188	-0.0860215	-0.153846
0.0870871	0.00125471	-0.076555	0.0269542	-0.0567376	-0.11875	-0.027027	-0.0227273	-0.0672269	-0.034188	0	0.032967
0.0810811	0.0108741	-0.133971	0.0658452	0.0189125	0.05	0	-0.0328283	-0.0756303	-0.0683761	-0.0860215	0.010989
0.015015	0.0121288	-0.062201	0.0589141	-0.0543735	-0.1	-0.0810811	-0.0020202	0.0336134	-0.00854701	0.0215054	0.0659341
0.0660661	0.0217482	-0.0526316	0.0743165	-0.0851064	-0.05625	-0.0540541	0.0292929	-0.0672269	-0.034188	0.0107527	0
0	0.0217482	-0.0334928	0.103966	-0.0425532	-0.01875	-0.0135135	0.0287879	-0.0252101	0.0854701	0.11828	0.0989011
-0.024024	0.0489335	-0.0717703	0.104736	-0.0260047	-0.0625	-0.0540541	0.0414141	-0.0504202	-0.145299	-0.0860215	-0.120879
-0.012012	0.0305312	-0.129187	0.132846	0	-0.03125	-0.0540541	0.039899	0.0756303	-0.0683761	-0.172043	0.021978
-0.024024	0.02844	-0.00478469	0.12707	-0.0189125	-0.125	-0.0135135	0.0616162	-0.0756303	-0.0683761	-0.150538	-0.0879121
0.00600601	0.0698453	-0.177033	0.136311	0.0661939	0.0125	-0.027027	0.0449495	0.142857	-0.0769231	-0.0107527	-0.0879121
-0.0900901	0.0581347	-0.0813397	0.180208	0	-0.1	0.027027	0.0616162	0	-0.017094	-0.0430108	-0.120879
-0.0840841	0.0991217	0.0191388	0.172892	0.0260047	0.04375	0.0405405	0.0636364	-0.0420168	-0.0683761	0.0645161	-0.10989
-0.033033	0.069427	-0.0382775	0.156334	0.0378251	-0.04375	0.108108	0.0616162	0.0168067	-0.0854701	-0.0752688	-0.032967
-0.123123	0.0313676	-0.105263	0.179823	-0.00472813	-0.0875	0.0945946	0.0419192	0.0168067	0.017094	-0.11828	0.10989
-0.108108	0.0627353	-0.00956938	0.170196	0.00236407	0.0625	0.0810811	0.0343434	-0.0672269	0.00854701	0.0215054	-0.131868
-0.0690691	0.0869929	-0.0239234	0.180208	-0.0118203	0.04375	0.189189	0.0126263	-0.0588235	-0.153846	0.0107527	0.164835
-0.123123	0.129235	-0.0287081	0.217944	-0.0472813	0.01875	0.0540541	0.0368687	0.0336134	-0.0598291	0	0.032967
-0.0870871	0.0828105	-0.0430622	0.242973	-0.0685579	-0.0125	0.0135135	0.0171717	0.10084	0.102564	-0.0752688	-0.032967
-0.162162	0.122125	-0.114833	0.2268	-0.0898345	0	-0.0135135	0.0353535	0.0504202	-0.0854701	0.0107527	0.010989
-0.108108	0.108741	-0.105263	0.22372	-0.0070922	0.025	0.0945946	0.00353535	-0.092437	-0.0683761	0	0.0549451
-0.204204	0.143455	-0.119617	0.227955	-0.0520095	0.04375	0.027027	0.0176768	0.0168067	-0.042735	-0.0107527	0
-0.201201	0.154329	-0.0239234	0.204467	-0.0496454	0	0.0540541	0.0161616	0.092437	-0.034188	0.0107527	0.10989
-0.228228	0.136345	0.00956938	0.200231	-0.0992908	0.05625	0.0945946	0.0161616	-0.0504202	-0.0769231	0.215054	0.021978
-0.174174	0.151819	-0.0574163	0.156334	-0.0661939	0.125	0	0.0121212	-0.0588235	-0.00854701	0.172043	-0.10989
-0.243243	0.101631	0.00956938	0.125144	-0.0851064	-0.0625	0.027027	0.029798	0.0840336	-0.0598291	-0.0537634	-0.0989011
-0.195195	0.0757005	-0.0861244	0.13092	-0.0661939	0.08125	0.0405405	0.040404	0.0504202	0.0940171	0	0.021978
-0.171171	0.0083647	-0.062201	0.155179	-0.0378251	0.09375	-0.0135135	0.0161616	-0.0252101	-0.0598291	0.16129	0
-0.198198	-0.00125471	-0.0717703	0.161725	-0.113475	0.1375	0.0945946	-0.00909091	-0.00840336	-0.128205	0.139785	0
-0.264264	-0.000418235	-0.0717703	0.122834	-0.1513	-0.01875	0.0135135	0.000505051	0.0168067	0	0.0967742	0
-0.267267	-0.000418235	-0.110048	0.108587	-0.12766	-0.03125	0.108108	-0.0308081	-0.0672269	-0.034188	-0.0215054	0.0549451
-0.24024	0.00083647	-0.129187	0.0623797	-0.0851064	0.025	0.0540541	-0.0217172	-0.0168067	-0.145299	0.172043	-0.032967
-0.282282	0.00250941	-0.062201	0.045437	-0.0780142	0.23125	0.0810811	-0.0373737	-0.168067	-0.025641	0.0430108	0.10989
-0.243243	-0.02133	-0.110048	0.00962649	-0.0945626	0.04375	0.189189	0.00555556	-0.10084	-0.153846	0.129032	0.197802
-0.213213	-0.0221665	-0.162679	-0.0342703	-0.0969267	-0.0125	0.0675676	0.0232323	0	0.00854701	0.16129	0.0879121
-0.267267	-0.0644082	-0.105263	-0.0693107	-0.0756501	0.00625	0.0405405	-0.0247475	-0.0420168	0	0.129032	-0.032967
-0.234234	-0.0560435	-0.157895	-0.104736	-0.070922	-0.025	0.0405405	-0.00656566	0.0756303	-0.0512821	0	0.120879
-0.297297	-0.0773735	-0.129187	-0.128995	-0.106383	-0.025	0.0675676	-0.0020202	-0.00840336	-0.188034	0.0322581	0.043956
-0.252252	-0.0577164	-0.062201	-0.155564	-0.196217	-0.01875	0.0135135	-0.0030303	-0.109244	0.0683761	0.247312	0.0549451
-0.276276	-0.0740276	0.00956938	-0.16211	-0.196217	-0.00625	0.108108	0.0126263	-0.0420168	-0.0940171	0.11828	0.0769231
-0.258258	-0.083647	-0.143541	-0.146708	-0.137116	-0.04375	0.0675676	0.0207071	-0.0840336	0.0854701	0.11828	-0.0769231
-0.279279	-0.0644082	-0.076555	-0.15903	-0.165485	-0.04375	0.108108	0.0020202	-0.0504202	-0.0769231	-0.0537634	0.021978
-0.216216	-0.0928482	-0.0717703	-0.132461	-0.217494	0	0.108108	0.0631313	-0.12605	-0.119658	0.0967742	0.010989
-0.321321	-0.127143	0.0382775	-0.116288	-0.179669	-0.1125	0.0405405	0.0292929	-0.0336134	0.00854701	0.129032	-0.021978
-0.333333	-0.0882476	0.00478469	-0.133231	-0.222222	-0.0625	-0.027027	0.0212121	0.0168067	-0.017094	0	-0.032967
-0.354354	-0.0761188	-0.0382775	-0.13169	-0.170213	-0.025	0	0.0116162	-0.12605	-0.0854701	-0.0430108	0
-0.312312	-0.115015	-0.0287081	-0.164806	-0.177305	-0.10625	0.0135135	0.0227273	-0.109244	-0.179487	0.0215054	0
-0.339339	-0.062317	0.0287081	-0.150173	-0.212766	-0.025	0.121622	0.00909091	0.117647	0.145299	0.0537634	0.021978
-0.336336	-0.0715182	0	-0.138236	-0.222222	0.0125	0	0.0227273	0.0168067	-0.025641	0.150538	0.0549451
-0.288288	-0.0681723	0	-0.0731613	-0.222222	-0.09375	0.121622	0	-0.0252101	-0.119658	0.0215054	0.153846
-0.342342	-0.0928482	0.0813397	-0.0723912	-0.193853	-0.04375	0.0810811	0.0257576	-0.0840336	-0.025641	-0.107527	0.0879121
-0.366366	-0.104141	0.162679	-0.0820177	-0.222222	-0.10625	-0.0540541	0.039899	-0.0840336	-0.128205	0.0107527	-0.0659341
-0.399399	-0.148892	0.0717703	-0.09665	-0.222222	-0.0125	0.0675676	0.0510101	0.193277	-0.162393	0	0.0989011
-0.312312	-0.168967	0.124402	-0.0824028	-0.234043	-0.08125	0.0945946	0.0166667	0.0588235	-0.179487	0.0215054	0.032967
-0.393393	-0.139272	0.124402	-0.117058	-0.281324	-0.03125	0.0405405	0.0454545	-0.092437	-0.0854701	-0.0107527	0.021978
-0.363363	-0.0455876	0.0909091	-0.0885637	-0.217494	-0.0125	0.162162	0.0328283	-0.0252101	0.017094	-0.0215054	0.0549451
-0.393393	-0.0878294	0.00478469	-0.131305	-0.217494	0.0625	-0.027027	0.0282828	-0.0168067	-0.162393	0.0215054	-0.0659341
-0.39039	-0.101213	0.105263	-0.0847131	-0.200946	-0.11875	0	0.00707071	-0.0588235	-0.0769231	-0.0645161	0.0549451
-0.321321	-0.127143	0.0239234	-0.120139	-0.252955	-0.05	0.0810811	-0.0020202	0.0420168	-0.0854701	0.0752688	-0.032967
-0.429429	-0.204517	0.0574163	-0.319985	-0.470449	-0.1	0.121622	-0.243939	0.0420168	-0.247863	0.0967742	0.043956
-0.444444	-0.0832288	0.0717703	-0.171737	-0.307329	-0.2125	0.108108	-0.019697	0.0756303	-0.128205	0.483871	0.285714
-0.414414	-0.0589711	0.220096	-0.174432	-0.330969	-0.11875	0.22973	0.0378788	0.0672269	-0.025641	0.365591	0.21978
-0.417417	-0.04977	0.358852	-0.138236	-0.304965	-0.04375	0.621622	0.019697	0.226891	-0.034188	0.354839	0.417582
-0.384384	-0.0322041	0.559809	-0.147093	-0.257683	-0.1125	0.959459	0.0242424	0.260504	0.0512821	0.677419	0.472527
-0.447447	-0.0175659	0.92823	-0.113593	-0.205674	-0.08125	1.52703	0.059596	0.285714	0	0.645161	0.725275
-0.429429	0.0167294	0.880383	-0.120139	-0.0969267	0.0375	1.98649	0.0666667	0.268908	0.034188	0.83871	1.04396
-0.324324	0.0292765	1.16268	-0.0608394	-0.115839	-0.075	2.52703	0.0782828	0.176471	0.042735	0.827957	1.04396
-0.366366	0.0748641	1.17225	-0.0250289	0.0165485	0.09375	3.13514	0.0257576	0.336134	0.247863	1.19355	1.45055
-0.33033	0.0945211	1.30622	0.0308048	0.0661939	-0.0375	3.54054	0.0777778	0.210084	0.136752	1.2043	1.15385
-0.285285	0.158093	1.39234	0.0277243	0.231678	-0.04375	3.81081	0.070202	0.403361	0.264957	1.4086	1.42857
-0.171171	0.161439	1.51196	0.0754717	0.210402	0.075	4.2973	0.0621212	0.336134	0.299145	1.25806	1.43956
-0.033033	0.19657	1.63158	0.13169	0.262411	0.05625	4.63514	0.0656566	0.453782	0.410256	1.29032	1.36264
-0.045045	0.164785	1.689	0.142087	0.330969	0.10625	4.91892	0.0515152	0.319328	0.598291	1.51613	1.3956
-0.00600601	0.176913	1.689	0.157874	0.356974	0.2	5.02703	0.0737374	0.168067	0.547009	1.13978	1.35165
0.129129	0.204517	1.85167	0.190219	0.387707	0.33125	4.94595	0.1	0.226891	0.581197	1.50538	1.52747
0.318318	0.18486	1.95215	0.221409	0.602837	0.4	5.21622	0.0828283	0.361345	0.547009	1.50538	1.6044
0.342342	0.176495	1.88517	0.229111	0.628842	0.53125	5.14865	0.0818182	0.268908	0.598291	1.68817	1.52747
0.402402	0.173986	1.72727	0.274933	0.72104	0.575	5.28378	0.0909091	0.369748	0.735043	1.68817	1.30769
0.588589	0.156002	1.92344	0.271467	0.673759	0.75625	5.28378	0.0969697	0.310924	0.666667	1.31183	1.27473
0.534535	-0.0305312	2.29187	0.195995	0.463357	0.93125	5.05405	-0.0863636	-0.0588235	0.452991	1.32258	0.835165
0.804805	0.16353	2.88995	0.432807	0.565012	1.33125	5.60811	0.0525253	0.0168067	0.65812	1.64516	2.21978
0.90991	0.219992	3.32536	0.475549	0.659574	1.5125	6.43243	0.0424242	0.0336134	0.692308	1.50538	2.35165
0.954955	0.165621	2.98565	0.450135	0.775414	1.7875	6.59459	0.0454545	0.134454	0.521368	1.67742	2.49451
1.04204	0.0857382	3.11005	0.415094	0.742317	1.9875	6.40541	0.0166667	0.10084	0.641026	1.80645	2.52747
1.13814	0.0648264	3.1866	0.466692	0.761229	2.0125	6.16216	0.0479798	0.0840336	0.435897	2.07527	2.41758
1.15015	0.0455876	3.11483	0.397767	0.813239	2.23125	6.32432	0.0323232	-0.0252101	0.444444	2.01075	2.28571
1.21321	-0.00669176	3.2201	0.423951	0.903073	2.3375	5.83784	0.0318182	-0.00840336	0.555556	1.80645	2.41758
1.17117	-0.00418235	3.05263	0.365422	0.957447	2.4625	5.85135	0.0171717	0.0588235	0.461538	1.68817	2.27473
1.3033	-0.0125471	3.11962	0.38891	0.900709	2.66875	5.52703	0.0419192	0.092437	0.521368	1.86022	2.28571
1.18619	-0.0150565	2.99043	0.391606	0.900709	2.73125	5.45946	0.0383838	0.0588235	0.487179	1.83871	2.31868
1.4024	-0.0405688	2.7799	0.372738	0.929078	2.81875	5.13514	0.070202	0.109244	0.538462	1.91398	2.26374
1.13514	-0.0526976	3.00957	0.35387	0.858156	3.14375	4.94595	0.0712121	0.0588235	0.487179	1.78495	2.41758
1.24324	-0.06399	2.74641	0.303427	0.853428	3.23125	4.74324	0.0434343	-0.0504202	0.495726	2.26882	2.12088
1.29129	-0.040987	2.79426	0.305737	0.879433	3.43125	4.45946	0.0338384	-0.12605	0.401709	1.92473	2.26374
1.14414	-0.0514429	2.5933	0.28764	1.00709	3.5375	4.18919	0.0565657	0.0336134	0.649573	1.89247	1.79121
1.18018	-0.055207	2.56459	0.251059	0.886525	3.76875	3.95946	0.0383838	-0.0420168	0.384615	2.01075	1.94505
1.25526	-0.0556253	2.46411	0.134386	0.886525	3.89375	3.86486	0.0262626	-0.0756303	0.367521	2.06452	2.06593
1.24324	-0.0359682	2.43541	0.181748	0.98818	4.0375	3.67568	0.030303	0.0672269	0.239316	2.03226	1.73626
1.12312	-0.0786282	2.37321	0.236427	0.943262	4.0625	3.54054	0.0818182	-0.142857	0.239316	1.77419	1.83516
1.24324	-0.0535341	2.311	0.167501	0.985816	4.1375	3.24324	0.0247475	0.184874	0.307692	1.56989	1.48352
1.13814	-0.0807194	2.16746	0.187139	0.900709	4.0875	3.17568	0.0555556	-0.0336134	0.153846	1.5914	1.59341
1.12312	-0.0953576	2.06699	0.127455	1.07092	4.0875	2.90541	0.0449495	0	0.34188	1.51613	1.27473
1.00901	-0.0589711	1.89952	0.0985753	0.950355	4.33125	2.85135	0.0308081	0.0756303	0.324786	1.46237	1.45055
0.927928	-0.0535341	1.76555	0.0650751	1.10875	4.06875	2.64865	0.0272727	0.0420168	0.324786	1.60215	1.08791
0.885886	-0.0451694	1.7799	0.0496727	1.08511	4.1625	2.52703	0.0429293	-0.0588235	0.230769	1.37634	1.08791
0.852853	-0.0564617	1.64593	0.0142472	1.17494	4.01875	2.47297	0.029798	0.0420168	0.350427	1.33333	1.03297
0.837838	-0.0476788	1.6555	-0.0142472	1.23168	4.05	2.33784	0.0510101	0.0504202	0.179487	1.3871	1.05495
0.753754	-0.0606441	1.62201	-0.0604544	1.37116	3.8625	2.40541	0.039899	-0.0504202	0.188034	1.24731	1
0.768769	-0.0685905	1.44019	-0.0585291	1.26478	3.9	2.21622	0.0949495	0.0252101	0.34188	1.2043	0.967033
0.81982	-0.0614806	1.57416	-0.0766269	1.22931	3.56875	2	0.089899	0.0252101	0.196581	1.04301	0.747253
0.765766	-0.069427	1.38756	-0.0635348	1.29314	3.68125	1.82432	0.131313	0.00840336	0.162393	1.02151	0.857143
0.666667	-0.0895023	1.27751	-0.0693107	1.28132	3.28125	1.74324	0.140909	0.134454	0.264957	1.07527	0.945055
0.627628	-0.122125	1.2201	-0.106662	1.11111	3.25625	1.7973	0.137374	0.0504202	0.264957	0.924731	0.593407
0.582583	-0.115433	1.14833	-0.083943	1.07565	3.1375	1.5	0.126263	0.00840336	0.111111	0.860215	0.758242
0.477477	-0.12087	1.2201	-0.0881787	0.971631	3.1	1.35135	0.112121	0	0.264957	0.849462	0.802198
0.414414	-0.102468	1.28708	-0.186369	0.851064	3.18125	1.37838	0.0929293	-0.10084	0.153846	0.677419	0.615385
0.444444	-0.142618	1.06699	-0.167886	0.959811	3.0875	1.43243	0.100505	0.0588235	0.222222	0.655914	0.604396
0.387387	-0.130489	1.12919	-0.195225	0.983452	2.75	1.27027	0.161111	-0.117647	0.196581	0.741935	0.681319
0.285285	-0.145128	1	-0.198691	0.791962	2.73125	1.2973	0.0873737	0.0168067	0.0854701	0.569892	0.604396
0.327327	-0.12798	0.923445	-0.207547	0.843972	2.7	1.18919	0.0934343	-0.0840336	0.179487	0.763441	0.659341
0.393393	-0.13509	0.889952	-0.222179	0.851064	2.65	1.05405	0.132828	-0.0840336	0.205128	0.634409	0.604396
0.285285	-0.134672	0.885167	-0.245283	0.810875	2.34375	1.04054	0.124242	-0.0672269	0.213675	0.688172	0.516484
0.183183	-0.152238	0.832536	-0.279938	0.815603	2.425	1.05405	0.126768	-0.092437	0.153846	0.677419	0.56044
0.15015	-0.147219	0.827751	-0.310358	0.730496	2.25	1.02703	0.143939	0.151261	0.153846	0.548387	0.571429
0.153153	-0.138018	0.76555	-0.320755	0.652482	2.125	1.09459	0.164141	-0.12605	0.111111	0.569892	0.384615
0.0840841	-0.149728	0.870813	-0.298806	0.72104	2.025	0.959459	0.155051	-0.0588235	0.0512821	0.698925	0.868132
0.126126	-0.134672	0.736842	-0.286869	0.612293	2.13125	0.891892	0.178283	-0.0588235	0.0598291	0.494624	0.450549
0.0810811	-0.139272	0.674641	-0.333462	0.529551	1.75	0.918919	0.155051	0.109244	0.119658	0.505376	0.538462
0.03003	-0.143455	0.631579	-0.339623	0.536643	1.6375	0.837838	0.171717	-0.0168067	0.119658	0.602151	0.43956
-0.003003	-0.153074	0.722488	-0.346939	0.489362	1.6375	0.945946	0.177273	0.159664	0.102564	0.419355	0.263736
-0.042042	-0.142618	0.655502	-0.330381	0.456265	1.65625	1	0.168687	-0.00840336	0.128205	0.483871	0.395604
-0.033033	-0.148892	0.717703	-0.334617	0.453901	1.60625	0.945946	0.182828	0.10084	0.153846	0.290323	0.186813
-0.0510511	-0.148892	0.655502	-0.376203	0.432624	1.5125	0.986486	0.173737	0.0756303	0.247863	0.365591	0.307692
-0.0510511	-0.176077	0.803828	-0.362341	0.335697	1.38125	0.945946	0.143939	0.0840336	0.179487	0.247312	0.296703
-0.0900901	-0.177332	0.717703	-0.370042	0.401891	1.2375	0.810811	0.173737	-0.0252101	0.247863	0.215054	0.362637
-0.0960961	-0.190715	0.684211	-0.376203	0.338061	1.1875	0.878378	0.171212	0.0336134	0.0598291	0.150538	0.483516
-0.048048	-0.184023	0.602871	-0.38737	0.380615	1.08125	0.756757	0.155051	0.0504202	0.102564	0.311828	0.252747
-0.126126	-0.186115	0.62201	-0.396997	0.300236	1.125	0.797297	0.138384	0.151261	0.136752	0.290323	0.516484
-0.153153	-0.18486	0.62201	-0.402772	0.326241	1.10625	0.797297	0.135859	0.092437	0.017094	0.397849	0.0549451
-0.162162	-0.199916	0.578947	-0.399307	0.368794	1.0375	0.635135	0.119697	0.142857	0.17094	0.301075	0.274725
-0.123123	-0.192388	0.583732	-0.421255	0.3026	0.99375	0.621622	0.0838384	0.0504202	0.239316	0.354839	0.285714
-0.165165	-0.181514	0.684211	-0.397767	0.229314	0.94375	0.635135	0.090404	0.0252101	0.153846	0.182796	0.21978
-0.147147	-0.180259	0.631579	-0.41702	0.269504	0.85	0.675676	0.0909091	0.0672269	0.17094	0.397849	0.285714
-0.21021	-0.228775	0.569378	-0.423566	0.122931	0.85	0.594595	0.106061	0.10084	0.153846	0.322581	0.351648
-0.162162	-0.219155	0.62201	-0.425876	0.264775	0.80625	0.689189	0.0984849	0.0588235	0.025641	0.27957	0.197802
-0.252252	-0.216228	0.449761	-0.432037	0.241135	0.75625	0.621622	0.0737374	0.00840336	0.273504	0.344086	0.043956
-0.21021	-0.218737	0.45933	-0.417405	0.21513	0.71875	0.648649	0.0893939	0.0504202	0.034188	0.182796	0.340659
-0.216216	-0.230866	0.521531	-0.440508	0.20331	0.6125	0.581081	0.0777778	-0.0168067	0.0769231	0.311828	0.285714
-0.267267	-0.241322	0.444976	-0.400462	0.170213	0.56875	0.608108	0.0727273	0.0420168	0.0512821	0.290323	0.0989011
-0.153153	-0.233793	0.382775	-0.438198	0.20331	0.65	0.540541	0.0863636	0.0504202	-0.00854701	0.182796	0.131868
-0.237237	-0.268925	0.454545	-0.406238	0.1513	0.6	0.608108	0.0853535	0.0168067	0.136752	0.193548	0.21978
-0.249249	-0.23463	0.349282	-0.403158	0.113475	0.6	0.608108	0.0454545	0.0252101	0.034188	0.182796	0.142857
-0.249249	-0.179841	0.392345	-0.41933	0.0851064	0.59375	0.513514	0.040404	-0.0336134	0	0.225806	0.208791
-0.267267	-0.157675	0.38756	-0.400077	0.070922	0.6125	0.554054	0.039899	0.142857	0.213675	0.0645161	0.263736
-0.285285	-0.115851	0.425837	-0.413939	0.0283688	0.6	0.527027	0.0318182	0.0420168	-0.00854701	0.139785	0.142857
-0.246246	-0.12798	0.473684	-0.438198	0.111111	0.5625	0.445946	0.0151515	-0.0672269	-0.0512821	0.182796	0.120879
-0.228228	-0.102049	0.30622	-0.440893	0.0118203	0.53125	0.513514	0.0368687	-0.0672269	-0.042735	0.247312	0.0549451
-0.363363	-0.12087	0.373206	-0.438198	-0.00236407	0.46875	0.445946	0.0267677	-0.0756303	-0.0512821	0.172043	0.0879121
-0.294294	-0.0995399	0.397129	-0.444359	0.0212766	0.5875	0.689189	0.0757576	-0.12605	-0.0769231	0.129032	0.10989
-0.288288	-0.0932664	0.454545	-0.445514	0.0378251	0.60625	0.5	0.0116162	-0.235294	0.025641	0.268817	0.208791
-0.207207	-0.0941029	0.478469	-0.430112	0.0236407	0.425	0.540541	0.0141414	-0.193277	0.162393	0.182796	0.285714
-0.273273	-0.0865747	0.349282	-0.443974	-0.00945626	0.43125	0.486486	-0.0161616	-0.109244	-0.0854701	0.182796	0.263736
-0.339339	-0.0485153	0.401914	-0.430497	0.0472813	0.35	0.594595	0.0166667	-0.117647	-0.025641	0.172043	0.230769
-0.309309	-0.0280217	0.30622	-0.438198	0	0.44375	0.486486	-0.00353535	-0.210084	-0.042735	0.258065	0.153846
-0.309309	-0.0150565	0.339713	-0.443589	0.0543735	0.38125	0.540541	-0.0171717	-0.0252101	0.00854701	0.172043	0
-0.363363	-0.0230029	0.363636	-0.446284	0.0591017	0.45	0.486486	-0.0247475	-0.134454	-0.0683761	0.0645161	0.021978
-0.351351	-0.026767	0.320574	-0.42241	0.073286	0.5	0.405405	-0.0186869	-0.117647	-0.0854701	0.193548	-0.0879121
-0.339339	0.00334588	0.392345	-0.41933	0.0803782	0.5	0.513514	-0.029798	-0.159664	-0.102564	0.16129	0.032967
-0.351351	-0.0472606	0.277512	-0.417405	0.122931	0.5125	0.554054	-0.0146465	-0.0252101	-0.136752	0.139785	0.0549451
-0.3003	-0.0727729	0.253589	-0.405083	0.148936	0.3625	0.527027	-0.070202	-0.092437	0	0.11828	-0.021978
-0.39039	-0.115851	0.291866	-0.418175	0.153664	0.44375	0.513514	-0.0611111	-0.0336134	-0.136752	0.139785	0.406593
-0.348348	-0.143455	0.425837	-0.393146	0.167849	0.30625	0.5	-0.0494949	0.0168067	-0.00854701	0.172043	0.0989011
-0.3003	-0.136345	0.454545	-0.406623	0.219858	0.3875	0.608108	-0.109596	0.0756303	0	0.139785	0.10989
-0.384384	-0.160184	0.37799	-0.397382	0.186761	0.3625	0.527027	-0.105556	0.0420168	-0.042735	0.419355	0.043956
-0.402402	-0.148892	0.287081	-0.374663	0.163121	0.375	0.702703	-0.105556	0.0672269	-0.179487	0.16129	0.021978
-0.39039	-0.176913	0.291866	-0.38429	0.196217	0.29375	0.459459	-0.107576	0.117647	-0.128205	0.215054	0.142857
-0.399399	-0.157256	0.334928	-0.384675	0.148936	0.3875	0.743243	-0.089899	0.109244	-0.162393	0.193548	0.186813
-0.417417	-0.140945	0.330144	-0.370427	0.160756	0.3875	0.554054	-0.0792929	0.294118	-0.0854701	0.301075	0.10989
-0.339339	-0.150146	0.416268	-0.375433	0.12766	0.30625	0.5	-0.0969697	0.0672269	-0.111111	0.172043	0.0659341
-0.408408	-0.153492	0.301435	-0.368887	0.217494	0.51875	0.486486	-0.114141	0.235294	0.0598291	0.27957	0
-0.354354	-0.135926	0.330144	-0.361186	0.120567	0.2375	0.635135	-0.129798	0.168067	0.034188	0.0860215	0.0549451
-0.432432	-0.157675	0.301435	-0.364266	0.13948	0.2625	0.540541	-0.0767677	0.12605	-0.025641	0.172043	0.0659341
-0.417417	-0.174822	0.397129	-0.380439	0.106383	0.25625	0.527027	-0.104545	0.159664	0.0598291	0.150538	0
-0.36036	-0.17524	0.267943	-0.395071	0.113475	0.25625	0.513514	-0.0818182	0.176471	-0.0854701	0.107527	-0.021978
-0.42042	-0.164785	0.473684	-0.396226	0.1513	0.25	0.445946	-0.120202	0.092437	-0.0598291	0.193548	0.131868
-0.348348	-0.149728	0.282297	-0.395071	0.113475	0.20625	0.608108	-0.153535	0.210084	-0.0940171	0.236559	0
-0.417417	-0.143036	0.368421	-0.394686	0.0992908	0.3	0.5	-0.181818	0.0840336	-0.0854701	0.16129	0.175824
-0.372372	-0.152656	0.363636	-0.408548	0.0992908	0.20625	0.567568	-0.168687	0.109244	-0.00854701	0.16129	0.120879
-0.441441	-0.180259	0.325359	-0.396997	-0.0165485	0.26875	0.486486	-0.20202	0.252101	0.111111	0.150538	-0.043956
-0.423423	-0.153074	0.215311	-0.406623	0.0520095	0.375	0.418919	-0.201515	0.151261	-0.0598291	0.311828	0.0769231
-0.42042	-0.172731	0.291866	-0.408933	0.0827423	0.2875	0.445946	-0.231313	0.235294	0.017094	0.27957	-0.021978
-0.414414	-0.18235	0.325359	-0.402002	0.0874704	0.2125	0.445946	-0.240909	0.134454	0.0512821	0.182796	0.0879121
-0.402402	-0.176913	0.320574	-0.405853	0.0520095	0.2625	0.513514	-0.248485	0.12605	-0.042735	0.225806	-0.021978
-0.438438	-0.187788	0.277512	-0.401232	0.0378251	0.175	0.432432	-0.257576	0.092437	-0.0683761	0.268817	0.0879121
-0.435435	-0.145128	0.244019	-0.38506	0.0803782	0.13125	0.378378	-0.262121	0.109244	0	0.204301	0
-0.444444	-0.154329	0.30622	-0.404698	0.0449173	0.23125	0.418919	-0.30101	0.142857	0	0.0967742	-0.010989
-0.414414	-0.171895	0.22488	-0.401617	0.0520095	0.11875	0.445946	-0.284343	0.0672269	0.025641	0.311828	0.0989011
-0.42042	-0.156002	0.315789	-0.391606	0.0520095	0.19375	0.432432	-0.30404	0.117647	0.0683761	0.333333	-0.010989
-0.399399	-0.162693	0.229665	-0.395456	0.0449173	0.1375	0.378378	-0.321212	0.117647	-0.00854701	0.150538	-0.032967
-0.402402	-0.168549	0.320574	-0.41625	0.0236407	0.05625	0.5	-0.314141	0.201681	0.025641	0.150538	0.120879
-0.441441	-0.157675	0.23445	-0.398152	0.0472813	0.15625	0.5	-0.30101	0.210084	-0.042735	0.107527	0.186813
-0.357357	-0.150983	0.253589	-0.414709	0.0685579	0	0.364865	-0.330808	0.210084	-0.017094	0.236559	0.043956
-0.378378	-0.178168	0.215311	-0.424721	0.00472813	0.0875	0.310811	-0.342929	0.0420168	0.0769231	0.172043	0.153846
-0.426426	-0.177332	0.181818	-0.391606	0.00472813	0.175	0.405405	-0.366667	0.168067	0	0.16129	0.10989
-0.402402	-0.193225	0.244019	-0.383134	-0.0283688	0.08125	0.337838	-0.403535	0.159664	-0.0683761	0.236559	0.120879
-0.495495	-0.216646	0.229665	-0.381209	-0.0283688	0.10625	0.283784	-0.40404	0.176471	0.273504	0.0860215	-0.021978
-0.510511	-0.208281	0.272727	-0.38968	-0.0141844	0.15	0.432432	-0.35	0.117647	0.00854701	0.0645161	-0.021978
-0.486486	-0.238394	0.143541	-0.388525	-0.070922	-0.025	0.324324	-0.410606	0.184874	0.205128	0.204301	0
-0.471471	-0.233793	0.215311	-0.368887	0.00945626	0.0625	0.175676	-0.391919	0.151261	-0.128205	0.107527	0.021978
-0.426426	-0.23463	0.291866	-0.383519	-0.0614657	0.075	0.418919	-0.392929	0.151261	-0.034188	0.290323	0.120879
-0.495495	-0.208699	0.244019	-0.390065	-0.115839	0.09375	0.378378	-0.395455	0.243697	-0.0598291	0.247312	0.175824
-0.39039	-0.216228	0.258373	-0.405083	-0.0638298	-0.0625	0.378378	-0.394444	0.10084	-0.102564	0.0215054	0
-0.405405	-0.223338	0.244019	-0.410089	-0.115839	-0.00625	0.432432	-0.405556	0.159664	-0.0854701	0.376344	0.021978
-0.435435	-0.186951	0.22488	-0.430882	-0.125296	0.0125	0.324324	-0.39798	0.184874	-0.017094	0.0967742	-0.010989
-0.462462	-0.17775	0.157895	-0.443589	-0.122931	-0.04375	0.337838	-0.391919	0.142857	0.0683761	0.322581	-0.0549451
-0.489489	-0.19657	0.210526	-0.458991	-0.191489	-0.01875	0.283784	-0.398485	0.0672269	0.0598291	0.0860215	0.010989
-0.498498	-0.205772	0.253589	-0.468618	-0.1513	-0.05625	0.243243	-0.414646	0.243697	-0.102564	0.150538	-0.032967
-0.459459	-0.199916	0.263158	-0.426261	-0.113475	0.0125	0.256757	-0.414141	0.0840336	0.0512821	0.150538	0.021978
-0.531532	-0.20619	0.162679	-0.441663	-0.205674	0.025	0.297297	-0.409596	0.0672269	-0.145299	0.0752688	-0.0769231
-0.492492	-0.211209	0.172249	-0.469388	-0.217494	-0.04375	0.297297	-0.386364	0.0756303	-0.102564	0.107527	0.10989
-0.537538	-0.196989	0.205742	-0.440123	-0.286052	-0.04375	0.324324	-0.380808	0.12605	-0.128205	0.322581	0.010989
-0.528529	-0.18235	0.177033	-0.410859	-0.196217	0	0.216216	-0.361111	0.092437	-0.102564	0.139785	-0.032967
-0.504505	-0.186533	0.263158	-0.387755	-0.205674	0.00625	0.27027	-0.356566	0.12605	-0.119658	0.182796	-0.186813
-0.426426	-0.19657	0.22488	-0.351945	-0.186761	0.075	0.283784	-0.329798	-0.0168067	-0.00854701	0.0430108	-0.10989
-0.495495	-0.195734	0.205742	-0.362341	-0.196217	0.00625	0.243243	-0.322727	0.159664	-0.0512821	0.0967742	-0.0989011
-0.528529	-0.186533	0.229665	-0.347709	-0.210402	0.06875	0.216216	-0.343434	0.235294	-0.230769	0.107527	-0.043956
-0.516517	-0.176495	0.244019	-0.371583	-0.208038	0.06875	0.310811	-0.34596	0.159664	0.042735	0.150538	0.010989
-0.543544	-0.160184	0.220096	-0.360416	-0.200946	0.075	0.148649	-0.360101	-0.0840336	0.102564	0.0537634	0.043956
-0.501502	-0.155165	0.354067	-0.35464	-0.219858	0.00625	0.162162	-0.361616	-0.134454	-0.145299	0.150538	0.0769231
-0.402402	-0.138436	0.239234	-0.372738	-0.238771	0.0375	0.0810811	-0.313131	-0.0672269	-0.00854701	0.0645161	-0.0769231
-0.51952	-0.158511	0.430622	-0.375048	-0.219858	0.0125	0.0810811	-0.343434	0	-0.0512821	0.129032	0.032967
-0.510511	-0.158093	0.277512	-0.395456	-0.245863	0.01875	0.202703	-0.328283	-0.109244	-0.042735	0.11828	0.10989
-0.456456	-0.168549	0.287081	-0.358876	-0.224586	0.075	0.162162	-0.320707	-0.0504202	0.145299	0.139785	0.153846
-0.468468	-0.190297	0.416268	-0.360416	-0.260047	-0.00625	0.0540541	-0.327778	0.0336134	-0.00854701	0.0967742	0.021978
-0.498498	-0.189879	0.535885	-0.393531	-0.231678	0.06875	-0.0135135	-0.313636	-0.0672269	-0.0769231	0.182796	0
-0.465465	-0.164366	0.37799	-0.419715	-0.22695	0.00625	0.0675676	-0.331818	-0.0504202	-0.034188	0.225806	0
-0.510511	-0.214555	0.349282	-0.418175	-0.200946	0.125	0.027027	-0.334848	-0.117647	-0.042735	0.150538	-0.010989
-0.444444	-0.188206	0.401914	-0.413554	-0.22695	0.06875	0.135135	-0.310606	0.0756303	0.0512821	0.0107527	0.0989011
-0.528529	-0.196152	0.38756	-0.415094	-0.210402	0.06875	0.0135135	-0.298485	-0.0756303	-0.179487	0.365591	0
-0.495495	-0.190297	0.311005	-0.413939	-0.250591	0.06875	0.135135	-0.306061	-0.134454	-0.0598291	0.333333	0.0549451
-0.495495	-0.19908	0.368421	-0.401232	-0.141844	-0.00625	-0.0135135	-0.291919	-0.0756303	0.0598291	0.258065	0.142857
-0.546547	-0.186533	0.349282	-0.432037	-0.193853	0.025	-0.0945946	-0.311616	-0.109244	0.179487	-0.0215054	0.153846
-0.552553	-0.188624	0.363636	-0.423566	-0.141844	0.19375	0.0135135	-0.316162	-0.12605	-0.17094	0.225806	0.142857
-0.531532	-0.178168	0.363636	-0.435502	-0.224586	0.06875	-0.0135135	-0.3	-0.168067	0	0.182796	0
-0.423423	-0.19197	0.368421	-0.426646	-0.167849	-0.0125	-0.0405405	-0.318182	-0.285714	-0.0940171	0.182796	-0.0879121
-0.498498	-0.186951	0.37799	-0.441278	-0.20331	0.06875	0.0945946	-0.29495	-0.294118	-0.0598291	0.172043	0.021978
-0.489489	-0.179423	0.382775	-0.42241	-0.144208	0.13125	-0.0405405	-0.327273	-0.184874	-0.017094	0.247312	0
-0.489489	-0.180259	0.258373	-0.425106	-0.210402	0.025	-0.0540541	-0.30101	-0.294118	0.025641	0.11828	0.131868
-0.522523	-0.17524	0.344498	-0.41856	-0.13948	0.05625	0.0675676	-0.329293	-0.226891	0.0940171	0.107527	-0.032967
-0.492492	-0.185278	0.325359	-0.427416	-0.148936	0.1375	-0.0540541	-0.323737	-0.260504	0.0598291	0.430108	-0.010989
-0.501502	-0.196152	0.344498	-0.434732	-0.200946	0.19375	-0.0810811	-0.293939	-0.302521	-0.0598291	0.247312	-0.0549451
-0.534535	-0.207026	0.277512	-0.430112	-0.160756	0.05	0.027027	-0.311616	-0.285714	-0.017094	0.11828	-0.21978
-0.54955	-0.233793	0.267943	-0.424336	-0.198582	0.13125	0.0135135	-0.344949	-0.243697	-0.00854701	0.204301	0.0549451
-0.525526	-0.245086	0.253589	-0.436273	-0.1513	0.1	0.0135135	-0.317677	-0.134454	-0.0512821	0.225806	0.153846
-0.537538	-0.271016	0.248804	-0.442434	-0.070922	0.08125	-0.0135135	-0.309091	-0.117647	-0.0512821	0.397849	0.043956
-0.483483	-0.282727	0.220096	-0.440508	-0.122931	0.00625	-0.027027	-0.294444	-0.201681	0.0683761	0.290323	0
-0.51952	-0.282309	0.272727	-0.440893	-0.134752	0.23125	0	-0.320202	-0.218487	-0.0512821	0.0752688	0.043956
-0.477477	-0.29151	0.354067	-0.443589	-0.073286	0.15	-0.0135135	-0.345455	-0.294118	-0.0854701	0.129032	0.0549451
-0.528529	-0.309076	0.287081	-0.450135	-0.13948	0.15	-0.027027	-0.34798	-0.277311	-0.102564	0.0107527	0.186813
-0.501502	-0.2844	0.349282	-0.473238	-0.115839	0.1125	0	-0.352525	-0.168067	-0.0683761	0.0107527	0.0989011
-0.540541	-0.268507	0.392345	-0.477089	-0.132388	0.1	0.121622	-0.347475	-0.285714	0.0854701	-0.0215054	-0.0769231
-0.531532	-0.273526	0.311005	-0.486715	-0.0969267	0.1	-0.0540541	-0.342929	-0.193277	-0.025641	0.0537634	-0.043956
-0.525526	-0.252196	0.267943	-0.48633	-0.120567	0.18125	0.0405405	-0.35	-0.151261	0	-0.0322581	-0.131868
-0.471471	-0.25345	0.315789	-0.45129	-0.106383	-0.00625	-0.0945946	-0.362626	-0.0588235	0.025641	0.107527	0.153846
-0.492492	-0.259724	0.30622	-0.447824	-0.170213	0.04375	0.0945946	-0.374747	-0.210084	-0.0769231	0.215054	0.131868
-0.537538	-0.253869	0.373206	-0.453985	-0.177305	0.00625	-0.0135135	-0.382323	-0.226891	-0.00854701	0.419355	-0.021978
-0.492492	-0.25596	0.354067	-0.472853	-0.0992908	-0.0125	-0.0675676	-0.390404	-0.0672269	-0.00854701	0.204301	0
-0.510511	-0.25345	0.272727	-0.448209	-0.167849	0.03125	0.148649	-0.383333	-0.193277	0.025641	0.0215054	-0.10989
-0.546547	-0.263488	0.349282	-0.48171	-0.153664	-0.05	-0.0945946	-0.383838	-0.109244	0.213675	0.107527	0.197802
-0.495495	-0.242995	0.215311	-0.456296	-0.179669	0.1125	0	-0.427273	-0.12605	-0.0769231	0.0752688	0.043956
-0.51952	-0.279799	0.258373	-0.475164	-0.172577	0.075	0.0135135	-0.398485	-0.0252101	0.034188	0.258065	0.142857
-0.501502	-0.280217	0.325359	-0.447824	-0.224586	0.15625	0.0945946	-0.411616	0.00840336	0.0683761	0.0860215	-0.0879121
-0.477477	-0.314095	0.301435	-0.451675	-0.125296	0.0375	-0.027027	-0.394444	-0.285714	0.128205	0.11828	-0.010989
-0.492492	-0.302802	0.349282	-0.459376	-0.146572	0.03125	-0.0675676	-0.416667	-0.12605	0.119658	0.311828	0.10989
-0.501502	-0.289419	0.272727	-0.472468	-0.22695	0.05	0.0810811	-0.419697	-0.176471	0.111111	0.247312	-0.0769231
-0.552553	-0.29862	0.287081	-0.456681	-0.212766	0.0375	0.0810811	-0.432323	-0.243697	0.25641	0.0967742	0.43956
-0.495495	-0.281054	0.325359	-0.490951	-0.224586	-0.06875	-0.0135135	-0.413131	-0.260504	0.111111	0.0645161	-0.0549451
-0.546547	-0.31033	0.315789	-0.482095	-0.241135	0.01875	-0.0540541	-0.440909	-0.210084	0.00854701	0.107527	0.10989
-0.540541	-0.323714	0.253589	-0.477089	-0.309693	0	0.027027	-0.466667	-0.226891	0.017094	0.129032	0.032967
-0.489489	-0.30573	0.244019	-0.491721	-0.286052	0.05625	-0.027027	-0.419697	-0.117647	0.102564	0.0860215	0.0879121
-0.474474	-0.300293	0.368421	-0.492106	-0.288416	0.01875	0.0405405	-0.428283	-0.142857	0.0512821	-0.0537634	0.142857
-0.456456	-0.31744	0.392345	-0.517905	-0.316785	0.00625	0.0945946	-0.428283	-0.10084	0.0598291	0.0967742	0.175824
-0.534535	-0.337934	0.334928	-0.522141	-0.245863	0.05625	0.0675676	-0.442424	-0.235294	-0.0683761	-0.0215054	0.0659341
-0.534535	-0.355082	0.382775	-0.528687	-0.304965	0.03125	0.0675676	-0.459091	-0.10084	0.0854701	0.0860215	0.175824
-0.477477	-0.339607	0.263158	-0.527532	-0.309693	0.09375	-0.0135135	-0.45303	-0.117647	-0.017094	-0.0215054	-0.10989
-0.441441	-0.350063	0.344498	-0.528302	-0.276596	-0.05	0.0135135	-0.486364	-0.0252101	0.00854701	-0.107527	0.0769231
-0.495495	-0.345044	0.430622	-0.535233	-0.198582	0.2	0.108108	-0.447475	-0.168067	-0.0512821	-0.107527	-0.0549451
-0.531532	-0.350063	0.416268	-0.539469	-0.219858	0.025	0.108108	-0.492929	-0.168067	-0.042735	0.0537634	0.197802
-0.495495	-0.376412	0.363636	-0.530227	-0.179669	0.04375	0	-0.501515	-0.142857	0.017094	-0.0322581	0.131868
-0.507508	-0.390213	0.363636	-0.540624	-0.236407	0.0125	0.0810811	-0.49798	-0.0672269	-0.017094	0.16129	0.0549451
-0.513514	-0.370974	0.315789	-0.533308	-0.198582	-0.05625	0	-0.490909	-0.0420168	-0.111111	-0.0752688	0.0879121
-0.501502	-0.37432	0.4689	-0.524451	-0.170213	0.14375	0.108108	-0.491919	-0.0756303	0.00854701	0.225806	-0.10989
-0.477477	-0.377666	0.23445	-0.505583	-0.0685579	-0.03125	0.0405405	-0.490404	-0.184874	-0.034188	0.11828	0.032967
-0.462462	-0.36261	0.287081	-0.534848	-0.0165485	-0.1375	0.0945946	-0.478788	-0.0168067	-0.025641	0.11828	0.296703
-0.510511	-0.360519	0.220096	-0.524836	-0.0165485	-0.0125	0.0945946	-0.497475	-0.134454	-0.042735	0.258065	0.164835
-0.525526	-0.357591	0.358852	-0.504043	-0.0141844	-0.125	0.148649	-0.478283	-0.0840336	0.0854701	-0.0107527	-0.010989
-0.495495	-0.36721	0.220096	-0.51675	-0.0425532	-0.04375	0.0405405	-0.494949	-0.12605	0.017094	0.16129	0.241758
-0.531532	-0.36972	0.267943	-0.498652	-0.0401891	0.05625	0.0810811	-0.475758	-0.117647	-0.111111	0.225806	0.0879121
-0.540541	-0.340025	0.421053	-0.497112	-0.073286	-0.0625	0.027027	-0.547475	-0.10084	0.0940171	0.247312	-0.032967
-0.522523	-0.391886	0.502392	-0.463612	0.00236407	-0.06875	0.121622	-0.49899	-0.201681	0.025641	0.0860215	-0.10989
-0.513514	-0.319532	0.684211	-0.433962	0.156028	-0.18125	0.0945946	-0.383333	-0.235294	-0.034188	0.215054	-0.043956
-0.477477	-0.328315	0.789474	-0.316134	0.21513	-0.0125	0.256757	-0.368687	-0.109244	0.042735	0.333333	0.164835
-0.465465	-0.314931	1.02392	-0.29303	0.170213	-0.1	0.202703	-0.375253	-0.109244	0	0.290323	0.10989
-0.471471	-0.294856	1.01914	-0.256835	0.330969	-0.05625	0.22973	-0.34596	-0.142857	0.025641	0.397849	0.0989011
-0.447447	-0.282727	1.24402	-0.271467	0.338061	0.04375	0.162162	-0.380808	-0.159664	0.034188	0.44086	-0.043956
-0.414414	-0.250105	1.19617	-0.252984	0.338061	0.04375	0.121622	-0.380808	0.10084	0	0.634409	0
-0.384384	-0.24634	1.37799	-0.298421	0.356974	0.15	0.256757	-0.385859	-0.0336134	0.025641	0.215054	0.131868
-0.444444	-0.247177	1.36364	-0.351559	0.36643	0.03125	0.27027	-0.391414	0.0672269	-0.00854701	0.258065	0.10989
-0.357357	-0.263488	1.23923	-0.374278	0.477541	0.15625	0.162162	-0.403535	-0.10084	-0.0854701	0.290323	0.428571
-0.39039	-0.285236	1.21053	-0.383519	0.423168	0.0875	0.202703	-0.393939	-0.10084	-0.017094	0.268817	0.43956
-0.402402	-0.292346	1.15311	-0.400462	0.397163	0.15	0.27027	-0.391919	-0.0588235	-0.00854701	0.129032	0.549451
-0.381381	-0.292765	1.1866	-0.375433	0.496454	0.2125	0.162162	-0.409596	-0.176471	-0.136752	0.290323	0.615385
-0.399399	-0.286073	1.07656	-0.393916	0.432624	0.18125	0.0945946	-0.420707	-0.117647	-0.0598291	0.236559	0.593407
-0.372372	-0.271853	1.08134	-0.394686	0.427896	0.2125	0.0675676	-0.397475	-0.12605	-0.0854701	0.290323	0.516484
-0.369369	-0.30322	0.985646	-0.413554	0.335697	0.06875	0.108108	-0.426768	-0.184874	-0.111111	0.215054	0.571429
-0.33033	-0.296529	0.961722	-0.407008	0.330969	0.29375	0.0810811	-0.422222	-0.142857	-0.0683761	0.247312	0.472527
-0.366366	-0.285655	1.00957	-0.401617	0.364066	0.24375	0.175676	-0.439394	-0.0588235	-0.017094	0.139785	0.472527
-0.324324	-0.293183	0.889952	-0.408163	0.255319	0.25	0.324324	-0.440909	-0.109244	0.0854701	0.483871	0.67033
-0.354354	-0.306985	1.07177	-0.410859	0.319149	0.25625	0.135135	-0.438384	-0.193277	-0.0598291	0.107527	0.549451
-0.372372	-0.296529	0.91866	-0.420485	0.364066	0.16875	0.135135	-0.425253	-0.142857	-0.136752	0.193548	0.450549
-0.339339	-0.286909	0.779904	-0.432037	0.295508	0.13125	0.0540541	-0.456566	-0.201681	-0.0769231	0.44086	0.571429
-0.375375	-0.254287	0.746412	-0.422796	0.27896	0.175	0.189189	-0.460606	-0.134454	-0.0940171	0.354839	0.549451
-0.372372	-0.260142	0.779904	-0.430882	0.243499	0.1875	0.283784	-0.482323	-0.260504	-0.213675	0.0967742	0.769231
-0.408408	-0.255542	0.684211	-0.430497	0.219858	0.1	0.22973	-0.476768	-0.218487	-0.136752	0.0430108	0.813187
-0.42042	-0.235466	0.69378	-0.410089	0.222222	0.125	0.175676	-0.476263	-0.218487	-0.128205	0.150538	0.527473
-0.411411	-0.27018	0.832536	-0.443204	0.179669	0.3125	0.027027	-0.49798	-0.210084	-0.111111	0.44086	0.615385
-0.417417	-0.271016	0.679426	-0.455141	0.236407	0.14375	0.0675676	-0.524747	-0.12605	-0.188034	0.16129	0.428571
-0.336336	-0.252196	0.712919	-0.445129	0.288416	0.13125	0.0810811	-0.531313	-0.0672269	-0.0769231	0	0.582418
-0.474474	-0.272689	0.732057	-0.440893	0.196217	0.15	0.027027	-0.518182	-0.0252101	-0.017094	0.225806	0.428571
-0.372372	-0.271016	0.665072	-0.460146	0.174941	0.025	0.0945946	-0.567172	0.0588235	-0.017094	0.0752688	0.494505
-0.462462	-0.27018	0.722488	-0.44898	0.184397	0.1125	0.0405405	-0.590404	-0.0420168	-0.128205	0.107527	0.395604
-0.405405	-0.268507	0.521531	-0.461302	0.189125	0.0875	0.0540541	-0.579798	0.0252101	0	0.0537634	0.296703
-0.405405	-0.263906	0.5311	-0.469003	0.1513	0.20625	0.027027	-0.582828	-0.201681	-0.0512821	0.204301	0.516484
-0.396396	-0.257633	0.588517	-0.456681	0.113475	-0.05	0.121622	-0.577778	-0.159664	-0.136752	0.0537634	0.373626
-0.426426	-0.258051	0.583732	-0.465922	0.189125	-0.0375	0.0405405	-0.592929	-0.0504202	-0.0940171	0.0860215	0.274725
-0.468468	-0.251359	0.655502	-0.470543	0.141844	0.05625	0.0540541	-0.59596	-0.184874	-0.042735	0.129032	0.307692
-0.441441	-0.260142	0.593301	-0.48094	0.0591017	0.16875	0.0540541	-0.591919	-0.109244	-0.102564	0.182796	0.505495
-0.516517	-0.261397	0.655502	-0.478629	0.0685579	0.08125	0.0540541	-0.589899	-0.00840336	-0.0940171	0.0860215	0.461538
-0.408408	-0.27729	0.727273	-0.48248	-0.073286	0.125	0.148649	-0.585354	-0.201681	-0.102564	0.0967742	0.241758
-0.438438	-0.26056	0.602871	-0.495187	-0.00945626	0.1875	0.121622	-0.602525	-0.117647	-0.119658	0.172043	0.208791
-0.474474	-0.256378	0.550239	-0.511744	0.0567376	0.08125	0.0405405	-0.612121	0.0252101	-0.162393	0.107527	0.186813
-0.492492	-0.245504	0.598086	-0.51521	0.0118203	0.025	0.0810811	-0.601515	-0.0420168	-0.102564	0.0645161	0.274725
-0.498498	-0.252196	0.588517	-0.51598	-0.0472813	0.01875	0.0540541	-0.598485	0.0504202	-0.0683761	0.193548	0.120879
-0.495495	-0.233793	0.684211	-0.527532	0.0212766	-0.05625	0.148649	-0.599495	-0.0588235	-0.128205	0.182796	0.10989
-0.516517	-0.215809	0.559809	-0.519446	-0.0992908	0.05625	0.0405405	-0.625758	-0.0672269	-0.00854701	0.150538	0.0879121
-0.486486	-0.212882	0.550239	-0.519446	-0.0378251	0.0625	0.0540541	-0.642424	-0.151261	-0.179487	0.182796	0.120879
-0.465465	-0.2179	0.488038	-0.518675	0.00472813	0.14375	0.175676	-0.621212	-0.109244	0.153846	0.107527	0.186813
-0.462462	-0.216646	0.521531	-0.522526	-0.0780142	0.1375	0.0945946	-0.635354	-0.168067	-0.111111	0.0752688	0.175824
-0.477477	-0.2179	0.559809	-0.530227	-0.0165485	0.2125	0.0675676	-0.627778	-0.210084	0.0512821	0.172043	0.186813
-0.489489	-0.214555	0.483254	-0.532923	0.0118203	0.15	0.0810811	-0.620707	-0.159664	-0.119658	0.107527	0.10989
-0.432432	-0.218737	0.636364	-0.5464	-0.0118203	0.35625	0.121622	-0.64798	-0.151261	-0.196581	0.0752688	0.230769
-0.492492	-0.236721	0.5311	-0.55025	-0.0567376	0.29375	0.0540541	-0.629798	-0.151261	-0.145299	0.0967742	-0.043956
-0.489489	-0.223756	0.607656	-0.54563	-0.035461	0.1375	-0.0405405	-0.637879	-0.176471	-0.017094	0.150538	0.142857
-0.432432	-0.231284	0.545455	-0.557952	0.0236407	0.23125	0.175676	-0.627778	-0.0336134	-0.025641	0.0537634	0.153846
-0.462462	-0.251359	0.617225	-0.545245	-0.0591017	0.1875	0.0540541	-0.641414	-0.252101	-0.0598291	0.150538	0.120879
-0.48048	-0.27018	0.435407	-0.557181	-0.00236407	0.2	0.0945946	-0.605051	-0.092437	-0.0769231	0.0860215	0.0549451
-0.462462	-0.283982	0.526316	-0.555256	-0.0307329	0.08125	0.0135135	-0.617172	-0.243697	-0.0940171	0.0430108	0.0989011
-0.447447	-0.288582	0.4689	-0.55025	-0.0874704	0.21875	0.121622	-0.629798	-0.226891	0.179487	0.107527	0.131868
-0.486486	-0.293601	0.5311	-0.543704	-0.0472813	0.1375	0.027027	-0.615657	-0.134454	0.00854701	0.0860215	-0.021978
-0.447447	-0.275617	0.45933	-0.556026	-0.120567	0.2625	0.027027	-0.632828	-0.092437	-0.0683761	-0.11828	0.153846
-0.468468	-0.287327	0.430622	-0.564883	-0.130024	0.20625	0	-0.607576	-0.168067	-0.0854701	-0.0107527	0
-0.45045	-0.293601	0.545455	-0.549865	-0.0567376	0.1375	0.0135135	-0.59596	-0.294118	0.0512821	-0.0537634	0.021978
-0.465465	-0.292765	0.583732	-0.559877	-0.0165485	0.1375	0.0810811	-0.606061	-0.117647	-0.102564	0.150538	0
-0.45045	-0.301547	0.526316	-0.556796	-0.0543735	0.16875	0.108108	-0.593939	0.0336134	-0.119658	0.0860215	0
-0.441441	-0.309076	0.454545	-0.565268	0.0260047	0.0625	0.121622	-0.578283	-0.117647	0.025641	0.0215054	0.0989011
-0.429429	-0.306985	0.425837	-0.552561	0	0.1125	0.0540541	-0.569697	-0.0336134	-0.162393	0.0107527	0.153846
-0.432432	-0.327896	0.45933	-0.570658	-0.073286	0.15625	0.0945946	-0.545455	-0.218487	-0.0598291	0.16129	-0.010989
-0.45045	-0.301966	0.373206	-0.564112	-0.106383	0.2875	0.0675676	-0.54798	-0.12605	-0.042735	-0.0752688	0.043956
-0.453453	-0.307821	0.406699	-0.553716	-0.035461	0.1625	0.135135	-0.506061	-0.176471	-0.136752	0.0537634	0.164835
-0.453453	-0.315349	0.416268	-0.566808	-0.0969267	0.16875	0.162162	-0.494949	-0.0840336	-0.128205	0.0860215	0.153846
-0.45045	-0.320786	0.392345	-0.556026	-0.106383	0.225	0.0405405	-0.474242	0.0840336	-0.128205	0.16129	0.0659341
-0.441441	-0.322041	0.373206	-0.561032	-0.122931	0.14375	0	-0.488889	-0.134454	-0.034188	-0.0322581	0.0879121
-0.465465	-0.344207	0.430622	-0.563727	-0.0945626	0.18125	0.121622	-0.462626	-0.184874	-0.042735	0.0860215	0.010989
-0.42042	-0.332079	0.440191	-0.560647	-0.193853	0.29375	0.148649	-0.44899	-0.159664	-0.0683761	0.0967742	0.274725
-0.462462	-0.340443	0.483254	-0.547555	-0.163121	0.1875	0.189189	-0.451515	-0.0756303	-0.0683761	-0.0860215	0.0989011
-0.498498	-0.334588	0.416268	-0.552561	-0.177305	0.23125	0.0810811	-0.429798	-0.184874	-0.025641	0.11828	0.032967
-0.477477	-0.350481	0.454545	-0.535233	-0.170213	0.15625	0.216216	-0.421717	-0.117647	0	-0.0215054	0.043956
-0.468468	-0.357173	0.5311	-0.54717	-0.231678	0.46875	0.0540541	-0.356061	-0.151261	0.0598291	0.0967742	0
-0.447447	-0.347135	0.368421	-0.5464	-0.167849	0.2375	0.175676	-0.366162	-0.168067	-0.0512821	0	0
-0.531532	-0.359682	0.401914	-0.544089	-0.191489	0.28125	0.148649	-0.341414	-0.176471	0.00854701	-0.0537634	0.285714
-0.483483	-0.360937	0.411483	-0.544089	-0.172577	0.25	0.0810811	-0.340404	-0.210084	-0.0769231	0.11828	0.0879121
-0.444444	-0.365956	0.311005	-0.548325	-0.179669	0.15625	0.0135135	-0.284848	-0.201681	0.153846	0.150538	-0.021978
-0.498498	-0.35299	0.339713	-0.554871	-0.184397	0.24375	-0.027027	-0.300505	-0.0168067	-0.042735	0.172043	0.0989011
-0.510511	-0.317859	0.344498	-0.554871	-0.146572	0.2	-0.0540541	-0.259091	-0.0420168	-0.017094	0.258065	0
-0.477477	-0.295274	0.296651	-0.551791	-0.200946	0.3	0.0945946	-0.234848	-0.092437	0.0940171	0.0752688	0.0659341
-0.501502	-0.29862	0.344498	-0.544474	-0.252955	0.325	-0.027027	-0.182828	-0.235294	0.0683761	0.0430108	0.120879
-0.540541	-0.326223	0.301435	-0.536388	-0.288416	0.33125	0.108108	-0.191919	-0.134454	-0.025641	0.0107527	0.0879121
-0.495495	-0.339607	0.277512	-0.526762	-0.255319	0.4125	0.108108	-0.160101	-0.168067	-0.0512821	0.129032	0.10989
-0.516517	-0.343789	0.287081	-0.527917	-0.281324	0.34375	0.0675676	-0.136869	-0.184874	-0.162393	0.0215054	-0.010989
-0.555556	-0.335006	0.334928	-0.519446	-0.229314	0.23125	0.0540541	-0.116162	-0.168067	-0.128205	0.150538	-0.010989
-0.471471	-0.33166	0.239234	-0.527147	-0.271868	0.31875	0.135135	-0.142929	-0.159664	0	-0.0860215	0.032967
-0.555556	-0.347135	0.30622	-0.540239	-0.293144	0.25625	0.22973	-0.125253	-0.117647	-0.034188	0.129032	-0.043956
-0.525526	-0.332079	0.311005	-0.538313	-0.295508	0.3625	0.175676	-0.10101	-0.252101	-0.102564	0.0322581	0
-0.483483	-0.318695	0.349282	-0.555641	-0.321513	0.40625	0.162162	-0.107576	-0.159664	0	0.0752688	-0.0769231
-0.462462	-0.290673	0.330144	-0.550635	-0.309693	0.3375	0.0405405	-0.108081	-0.0840336	-0.025641	0.0322581	-0.010989
-0.492492	-0.278545	0.244019	-0.544474	-0.349882	0.175	0.0810811	-0.0984849	-0.201681	-0.188034	0.0967742	-0.010989
-0.48048	-0.282309	0.267943	-0.549095	-0.335697	0.4125	0.0405405	-0.133838	-0.176471	-0.153846	0.0967742	-0.0659341
-0.510511	-0.288164	0.248804	-0.557181	-0.394799	0.26875	-0.0135135	-0.257576	-0.0756303	-0.179487	0.236559	0.0989011
-0.489489	-0.27478	0.191388	-0.554101	-0.361702	0.35625	0.0540541	-0.322222	-0.0672269	-0.162393	0.27957	-0.0549451
-0.525526	-0.31033	0.191388	-0.569503	-0.401891	0.24375	0.0405405	-0.238889	-0.134454	-0.136752	0.107527	0.043956
-0.537538	-0.298202	0.258373	-0.574509	-0.35461	0.3875	0.0135135	-0.131818	-0.134454	-0.111111	0.16129	0.032967
-0.531532	-0.311167	0.200957	-0.596843	-0.345154	0.25625	0.0540541	-0.0742424	-0.277311	-0.0512821	0.0860215	0.0659341
-0.510511	-0.313676	0.181818	-0.610705	-0.340426	0.325	0.0540541	-0.0757576	-0.184874	-0.145299	-0.0215054	-0.0549451
-0.507508	-0.318277	0.258373	-0.607239	-0.335697	0.31875	0.148649	-0.0545455	-0.193277	-0.0769231	-0.0215054	-0.153846
-0.540541	-0.340443	0.191388	-0.61417	-0.250591	0.3625	0.135135	-0.0565657	-0.243697	0.136752	0.0645161	0.010989
-0.531532	-0.322459	0.22488	-0.630343	-0.236407	0.28125	0.0405405	-0.0873737	-0.252101	0.017094	0.215054	0.010989
-0.468468	-0.325387	0.215311	-0.623797	-0.234043	0.31875	0.148649	-0.129293	-0.218487	-0.136752	0.150538	0.0769231
-0.540541	-0.361355	0.244019	-0.621871	-0.224586	0.23125	0.0945946	-0.127778	-0.285714	-0.136752	0.0215054	-0.043956
-0.51952	-0.332497	0.291866	-0.618021	-0.257683	0.30625	0.0135135	-0.190404	-0.176471	-0.102564	0.129032	-0.142857
-0.483483	-0.343789	0.248804	-0.631498	-0.262411	0.2375	0.0135135	-0.216667	-0.260504	-0.0512821	0.247312	0
-0.51952	-0.373066	0.177033	-0.620716	-0.21513	0.28125	0.189189	-0.212121	-0.226891	0.0683761	-0.0645161	-0.0989011
-0.504505	-0.365119	0.133971	-0.600693	-0.196217	0.3375	-0.0540541	-0.221717	-0.252101	-0.034188	0.322581	0.230769
-0.561562	-0.380176	0.148325	-0.619561	-0.21513	0.26875	0.027027	-0.242424	-0.201681	-0.128205	0.182796	-0.175824
-0.48048	-0.394814	0.215311	-0.605699	-0.189125	0.3	0.0810811	-0.226263	-0.226891	-0.0940171	-0.0215054	0.10989
-0.468468	-0.391886	0.210526	-0.618791	-0.210402	0.3125	0.0810811	-0.260101	-0.252101	-0.0940171	-0.0107527	-0.131868
-0.54955	-0.403597	0.186603	-0.624952	-0.184397	0.20625	-0.027027	-0.261111	-0.226891	-0.111111	0.0107527	-0.131868
-0.498498	-0.381849	0.133971	-0.636504	-0.248227	0.2125	0.0135135	-0.212121	-0.268908	-0.0940171	0.0860215	0.0549451
-0.504505	-0.38143	0.22488	-0.639199	-0.165485	0.2125	-0.0675676	-0.195455	-0.226891	-0.119658	-0.0752688	0.186813
-0.477477	-0.396905	0.200957	-0.619176	-0.146572	0.2375	-0.0810811	-0.204545	-0.184874	-0.153846	-0.0107527	0.120879
-0.501502	-0.401506	0.177033	-0.637274	-0.132388	0.275	-0.0540541	-0.19697	-0.201681	0.017094	-0.0752688	0
-0.513514	-0.391886	0.205742	-0.627647	-0.222222	0.3	0	-0.185859	-0.142857	-0.034188	-0.0322581	-0.0549451
-0.462462	-0.40276	0.263158	-0.629958	-0.186761	0.3125	0.0945946	-0.159091	-0.235294	0	-0.0215054	-0.142857
-0.525526	-0.392723	0.244019	-0.626877	-0.205674	0.36875	-0.0135135	-0.200505	-0.243697	-0.0512821	0.0537634	0.153846
-0.534535	-0.37683	0.22488	-0.635734	-0.163121	0.31875	0.148649	-0.194949	-0.210084	-0.0854701	0.0107527	-0.032967
-0.552553	-0.388122	0.287081	-0.625722	-0.184397	0.2375	0.0405405	-0.206566	-0.268908	-0.0769231	0.236559	-0.0549451
-0.504505	-0.398996	0.244019	-0.634193	-0.245863	0.2	-0.027027	-0.185859	-0.0840336	-0.0940171	0.0752688	-0.032967
-0.558559	-0.379757	0.248804	-0.620331	-0.255319	0.16875	0.027027	-0.184848	-0.252101	-0.017094	0.150538	0.241758
-0.507508	-0.390213	0.239234	-0.615325	-0.27896	0.2375	0.0135135	-0.204545	-0.243697	0.0769231	0.0537634	0.10989
-0.516517	-0.395232	0.220096	-0.626877	-0.335697	0.28125	0.0405405	-0.219192	-0.369748	0.042735	-0.0645161	-0.142857
-0.543544	-0.381849	0.325359	-0.629573	-0.330969	0.20625	0.0405405	-0.198485	-0.226891	0.0940171	0.0107527	0.0879121
-0.486486	-0.363864	0.220096	-0.625722	-0.297872	0.24375	-0.027027	-0.214646	-0.201681	0.153846	-0.0645161	0.0769231
-0.534535	-0.376412	0.229665	-0.637274	-0.345154	0.21875	-0.027027	-0.198485	-0.285714	0.299145	0.193548	-0.0989011
-0.51952	-0.385613	0.239234	-0.636119	-0.36643	0.33125	-0.0135135	-0.234343	-0.210084	0.487179	-0.0430108	0.142857
-0.525526	-0.385194	0.205742	-0.64767	-0.333333	0.275	0.0675676	-0.214646	-0.327731	0.478632	0.0107527	0.0769231
-0.513514	-0.387286	0.22488	-0.648826	-0.359338	0.2625	0.0675676	-0.212121	-0.302521	0.435897	-0.0322581	0.032967
-0.498498	-0.396905	0.253589	-0.653061	-0.330969	0.2625	-0.0945946	-0.205556	-0.285714	0.547009	-0.0215054	0
-0.558559	-0.390213	0.291866	-0.651521	-0.34279	0.26875	0.0945946	-0.199495	-0.168067	0.57265	-0.0967742	-0.0879121
-0.477477	-0.408616	0.325359	-0.638429	-0.297872	0.16875	-0.0810811	-0.217172	-0.252101	0.794872	0	-0.0659341
-0.558559	-0.406943	0.267943	-0.656527	-0.36643	0.26875	-0.0405405	-0.190404	-0.268908	0.666667	0.0322581	-0.043956
-0.546547	-0.398578	0.267943	-0.641509	-0.411348	0.28125	-0.0405405	-0.20101	-0.252101	0.435897	-0.0860215	0.0769231
-0.540541	-0.400251	0.339713	-0.651521	-0.394799	0.175	0	-0.216162	-0.319328	0.692308	0.11828	-0.0879121
-0.51952	-0.397742	0.325359	-0.64844	-0.406619	0.175	-0.0945946	-0.183838	-0.268908	0.521368	0	-0.120879
-0.546547	-0.404015	0.425837	-0.661147	-0.439716	0.13125	-0.0945946	-0.220707	-0.344538	0.529915	-0.0322581	0.208791
-0.537538	-0.40527	0.38756	-0.666153	-0.392435	0.24375	-0.0135135	-0.235859	-0.319328	0.547009	0.139785	0.021978
-0.546547	-0.389795	0.373206	-0.669619	-0.411348	0.325	-0.135135	-0.214141	-0.285714	0.521368	-0.0215054	-0.010989
-0.531532	-0.392304	0.397129	-0.663073	-0.427896	0.2875	-0.148649	-0.178283	-0.319328	0.478632	0.182796	-0.10989
-0.504505	-0.401506	0.354067	-0.67655	-0.36643	0.23125	-0.0945946	-0.169697	-0.176471	0.435897	-0.0107527	0.032967
-0.543544	-0.397323	0.354067	-0.668079	-0.399527	0.33125	-0.0540541	-0.211616	-0.252101	0.384615	-0.0107527	-0.043956
-0.486486	-0.406943	0.339713	-0.663458	-0.394799	0.25625	0.027027	-0.193939	-0.285714	0.401709	-0.0752688	-0.0549451
-0.495495	-0.409034	0.330144	-0.669619	-0.359338	0.20625	-0.121622	-0.231313	-0.403361	0.393162	-0.107527	-0.164835
-0.537538	-0.39105	0.296651	-0.670389	-0.352246	0.1375	-0.108108	-0.211616	-0.310924	0.324786	0.107527	-0.010989
-0.51952	-0.386449	0.406699	-0.67809	-0.404255	0.30625	-0.175676	-0.209091	-0.277311	0.239316	0.0215054	0.0549451
-0.471471	-0.395232	0.301435	-0.67886	-0.378251	0.1875	-0.162162	-0.231313	-0.310924	0.333333	0.0215054	-0.164835
-0.459459	-0.38394	0.267943	-0.668849	-0.319149	0.2375	-0.0675676	-0.235354	-0.210084	0.230769	0.193548	-0.032967
-0.498498	-0.404852	0.301435	-0.671544	-0.385343	0.25625	-0.175676	-0.217677	-0.193277	0.264957	0	-0.0549451
-0.51952	-0.403179	0.349282	-0.654987	-0.340426	0.125	-0.148649	-0.242424	-0.151261	0.239316	0.0322581	0.032967
-0.492492	-0.391886	0.263158	-0.669234	-0.394799	0.2125	-0.121622	-0.227273	-0.218487	0.264957	-0.0322581	-0.032967
-0.507508	-0.385613	0.282297	-0.674625	-0.338061	0.2125	-0.162162	-0.24596	-0.159664	0.25641	-0.107527	-0.021978
-0.54955	-0.413634	0.330144	-0.673469	-0.333333	0.2	-0.0405405	-0.224747	-0.294118	0.136752	-0.0215054	-0.0879121
-0.552553	-0.398996	0.325359	-0.668079	-0.316785	0.2375	-0.0675676	-0.219192	-0.285714	0.0940171	-0.0860215	-0.208791
-0.498498	-0.411543	0.239234	-0.664228	-0.300236	0.18125	-0.027027	-0.234848	-0.285714	0.102564	0.107527	-0.010989
-0.528529	-0.420744	0.277512	-0.664228	-0.345154	0.20625	-0.0540541	-0.255556	-0.310924	0.0683761	0.0322581	-0.032967
-0.474474	-0.427854	0.349282	-0.664228	-0.293144	0.2125	-0.0945946	-0.237879	-0.260504	0.034188	-0.0645161	0.131868
-0.504505	-0.406524	0.291866	-0.667693	-0.255319	0.1875	0	-0.263131	-0.184874	0.136752	0.0215054	0
-0.486486	-0.398996	0.354067	-0.674625	-0.330969	0.24375	-0.0810811	-0.242424	-0.277311	0.17094	0.0107527	0.131868
-0.552553	-0.399414	0.349282	-0.67886	-0.314421	0.25	-0.0135135	-0.24899	-0.193277	0.307692	0.0322581	-0.0549451
-0.534535	-0.410289	0.258373	-0.671159	-0.264775	0.19375	-0.0540541	-0.24596	-0.294118	0.0598291	-0.0430108	0.120879
-0.48048	-0.411962	0.244019	-0.669619	-0.297872	0.15	0.0405405	-0.255051	-0.210084	0.102564	0.204301	0.10989
-0.495495	-0.41238	0.133971	-0.689642	-0.271868	0.16875	0.175676	-0.231313	-0.176471	0.042735	0.0860215	-0.0989011
-0.531532	-0.386031	0.200957	-0.690797	-0.262411	0.21875	0.0675676	-0.230303	-0.142857	0	0.0430108	0.10989
-0.528529	-0.3601	0.23445	-0.689257	-0.245863	0.20625	0.148649	-0.283838	-0.260504	0.0769231	0.0860215	-0.043956
-0.513514	-0.37432	0.215311	-0.67501	-0.276596	0.25625	0.0810811	-0.24697	-0.176471	-0.00854701	-0.0430108	0.0549451
-0.540541	-0.362192	0.23445	-0.692722	-0.236407	0.2625	0.0135135	-0.259596	-0.142857	0.111111	0.107527	-0.043956
-0.489489	-0.34128	0.330144	-0.711205	-0.205674	0.3	0.0135135	-0.267172	-0.159664	0.102564	-0.193548	-0.043956
-0.507508	-0.307403	0.363636	-0.687332	-0.174941	0.3	0.0810811	-0.257071	-0.226891	0.0769231	0.0860215	-0.0659341
-0.474474	-0.286909	0.358852	-0.697343	-0.234043	0.175	0.0405405	-0.273232	-0.176471	0.153846	-0.0537634	-0.131868
-0.537538	-0.271016	0.330144	-0.694263	-0.283688	0.2625	0.0405405	-0.264141	-0.142857	0.00854701	-0.0752688	0.131868
-0.489489	-0.27478	0.267943	-0.685791	-0.319149	0.2625	0.0945946	-0.266667	-0.285714	-0.017094	-0.193548	0.0549451
-0.507508	-0.263906	0.392345	-0.687717	-0.293144	0.34375	0.121622	-0.262626	-0.243697	0.017094	0.0107527	0.021978
-0.48048	-0.251359	0.296651	-0.686561	-0.319149	0.225	0.027027	-0.285354	-0.252101	-0.042735	-0.0215054	-0.010989
-0.51952	-0.234212	0.315789	-0.708125	-0.35461	0.23125	0.162162	-0.285354	-0.218487	0.0598291	0.0430108	-0.021978
-0.537538	-0.23463	0.263158	-0.701964	-0.304965	0.25	0.135135	-0.266162	-0.092437	0.0683761	-0.0537634	-0.043956
-0.54955	-0.230029	0.363636	-0.704659	-0.321513	0.26875	0.216216	-0.276263	-0.142857	-0.0769231	0	0.0549451
-0.558559	-0.212463	0.430622	-0.715441	-0.338061	0.175	0.297297	-0.277778	-0.10084	-0.017094	0.0215054	0.021978
-0.498498	-0.203262	0.421053	-0.708125	-0.328605	0.35	0.202703	-0.286869	-0.285714	0.034188	-0.0107527	0.142857
-0.483483	-0.189879	0.401914	-0.710435	-0.328605	0.225	0.121622	-0.281818	-0.184874	-0.0598291	-0.0967742	0.0989011
-0.474474	-0.1422	0.4689	-0.715826	-0.269504	0.24375	0.0540541	-0.284343	-0.285714	-0.025641	-0.0645161	0.0549451
-0.531532	-0.0966123	0.363636	-0.713901	-0.29078	0.24375	0.0540541	-0.285859	-0.252101	-0.025641	-0.0752688	0.0659341
-0.510511	-0.109578	0.392345	-0.720447	-0.356974	0.275	0.175676	-0.279798	-0.285714	-0.025641	-0.11828	0.285714
-0.456456	-0.116688	0.368421	-0.708125	-0.312057	0.2625	-0.0135135	-0.276263	-0.235294	0.017094	-0.0215054	0.032967
-0.486486	-0.158093	0.425837	-0.715056	-0.304965	0.1875	0.108108	-0.287879	-0.277311	0.0512821	-0.0967742	0.21978
-0.486486	-0.158093	0.392345	-0.70774	-0.361702	0.28125	0.121622	-0.29798	-0.310924	0	-0.0537634	-0.0989011
-0.486486	-0.162693	0.401914	-0.705814	-0.371158	0.1875	0.121622	-0.270707	-0.310924	-0.017094	-0.150538	0.0549451
-0.432432	-0.158929	0.478469	-0.70851	-0.378251	0.3375	0.135135	-0.245455	-0.327731	-0.0512821	0.0860215	0.0659341
-0.477477	-0.164366	0.425837	-0.70774	-0.286052	0.20625	0.108108	-0.269697	-0.336134	0.102564	0.182796	-0.0989011
-0.510511	-0.159766	0.349282	-0.700038	-0.338061	0.28125	-0.0540541	-0.279293	-0.260504	-0.0769231	-0.0215054	0.10989
-0.498498	-0.178586	0.311005	-0.698498	-0.408983	0.2625	0.0135135	-0.283838	-0.294118	0.119658	-0.0430108	0.153846
-0.45045	-0.194479	0.440191	-0.697728	-0.314421	0.25	0.108108	-0.286364	-0.159664	-0.025641	-0.0107527	0.10989
-0.507508	-0.193643	0.349282	-0.716981	-0.36643	0.16875	0.0135135	-0.292929	-0.310924	0.0683761	0	0.142857
-0.474474	-0.386031	0.440191	-0.707355	-0.399527	0.24375	-0.0135135	-0.268687	-0.176471	0.128205	0.139785	0.0769231
-0.564565	-0.265997	0.205742	-0.813631	-0.491726	0.2	-0.0135135	-0.442424	-0.00840336	-0.213675	0.354839	-0.0659341
-0.525526	-0.278963	0.244019	-0.757797	-0.460993	0.0625	0.0810811	-0.414646	0.285714	-0.128205	0.473118	0.0769231
-0.429429	-0.319532	0.363636	-0.74509	-0.44208	0.075	0.175676	-0.462121	0.445378	-0.119658	0.548387	0.186813
-0.489489	-0.333333	0.344498	-0.720062	-0.373522	0.26875	0.581081	-0.307576	0.907563	0.136752	0.860215	0.21978
-0.483483	-0.307821	0.325359	-0.689642	-0.283688	0.3875	0.837838	-0.266667	1.31092	0.290598	1.32258	0.307692
-0.483483	-0.253869	0.397129	-0.67963	-0.236407	0.4625	1.17568	-0.286364	1.38655	0.145299	0.956989	0.648352
-0.453453	-0.202844	0.435407	-0.671544	-0.179669	0.6	1.31081	-0.236869	1.46218	0.495726	1.50538	0.703297
-0.438438	-0.123379	0.502392	-0.64767	-0.134752	0.675	1.78378	-0.228788	1.5042	0.717949	1.21505	0.923077
-0.378378	-0.116269	0.588517	-0.603389	-0.118203	0.91875	1.98649	-0.193939	1.60504	0.709402	1.72043	1.02198
-0.375375	-0.0899205	0.516746	-0.57836	-0.00472813	0.95625	2.27027	-0.211616	1.58824	1.17949	1.55914	0.967033
-0.387387	-0.0777917	0.602871	-0.565653	-0.0330969	0.9125	2.58108	-0.20303	1.61345	1.45299	1.75269	1.08791
-0.297297	-0.0723547	0.741627	-0.546015	-0.0070922	1.125	2.72973	-0.193939	1.83193	1.55556	2.05376	1.17582
-0.183183	-0.0514429	0.875598	-0.517905	0.0945626	1.50625	2.85135	-0.171717	1.63866	1.61538	2.06452	1.21978
-0.168168	-0.0460059	0.727273	-0.475549	0.101655	1.425	2.83784	-0.171717	1.68067	1.99145	2.15054	1.47253
-0.0570571	-0.0209118	0.741627	-0.450905	0.186761	1.675	3.01351	-0.164141	1.7395	2	2.27957	1.13187
-0.00600601	0.0175659	0.923445	-0.41933	0.27896	1.80625	3.14865	-0.184343	1.76471	2.10256	2.19355	1.40659
0.0810811	0.0368047	0.808612	-0.426646	0.229314	1.9375	3.08108	-0.175253	1.48739	2.30769	2.09677	1.53846
0.105105	0.0752823	0.751196	-0.373123	0.359338	1.7625	3.08108	-0.188384	1.47899	2.17094	2.53763	1.46154
0.201201	0.0702635	0.971292	-0.333847	0.345154	2.06875	3.14865	-0.175758	1.51261	2.37607	2.46237	1.72527
0.213213	0.0531159	0.952153	-0.311128	0.434988	2.45625	3	-0.232828	0.882353	2.31624	3	1.50549
0.174174	0.118361	1.05742	-0.32576	0.482269	2.09375	2.98649	-0.15202	1.05042	1.41026	2.89247	1.13187
0.258258	0.183605	1.55502	-0.216404	0.572104	3.375	4.25676	-0.118182	1.23529	2.23077	2.60215	2.17582
0.465465	0.209954	1.70335	-0.22603	0.751773	3.48125	4.44595	-0.159596	1.10084	2.24786	2.93548	2.14286
0.504505	0.164366	1.83254	-0.237197	0.713948	3.49375	4.35135	-0.144949	1.01681	2.21368	2.65591	2.36264
0.51952	0.165621	1.85646	-0.252599	0.728132	3.46875	4.35135	-0.161111	1.18487	2.09402	2.47312	2.36264
0.51952	0.155165	1.92823	-0.264536	0.780142	3.325	4.22973	-0.15303	1.05042	2.04274	2.52688	2.23077
0.588589	0.123379	1.88038	-0.274163	0.685579	3.36875	4.24324	-0.197475	1.17647	2.01709	2.35484	2.15385
0.675676	0.115851	1.87081	-0.282249	0.754137	3.15625	4.04054	-0.191414	1.03361	2.20513	2.36559	2.1978
0.627628	0.103304	1.79426	-0.278398	0.728132	3.15	3.98649	-0.233333	1.17647	1.97436	2.09677	2.06593
0.642643	0.104559	1.86603	-0.281094	0.780142	2.90625	3.77027	-0.285859	1.22689	2	2.12903	2.12088
0.603604	0.117942	1.91866	-0.266461	0.756501	3	3.87838	-0.308586	1.01681	1.78632	2.03226	1.8022
0.753754	0.0987035	1.76555	-0.284559	0.742317	2.88125	3.55405	-0.315657	1.02521	1.82051	1.87097	1.94505
0.768769	0.0644082	1.7799	-0.286484	0.742317	2.98125	3.25676	-0.335859	1.10924	1.71795	1.69892	1.85714
0.705706	0.0991217	1.86603	-0.262996	0.617021	2.9625	3.43243	-0.312626	1.11765	1.70085	1.91398	1.71429
0.774775	0.113342	1.70813	-0.264151	0.600473	2.5375	3.12162	-0.328283	1.08403	1.84615	1.75269	1.83516
0.717718	0.152238	1.66029	-0.269157	0.64539	2.525	2.71622	-0.316667	1.09244	1.65812	1.62366	1.68132
0.645646	0.152656	1.55981	-0.262996	0.631206	2.5375	2.52703	-0.35	0.907563	1.52137	1.5914	1.68132
0.687688	0.16813	1.61244	-0.271467	0.579196	2.54375	2.45946	-0.330808	0.932773	1.55556	1.32258	1.34066
0.681682	0.161857	1.42584	-0.277243	0.70922	2.3125	2.40541	-0.369697	0.92437	1.59829	1.43011	1.58242
0.705706	0.108323	1.43062	-0.274548	0.539007	2.26875	2.25676	-0.369697	0.97479	1.37607	1.15054	1.35165
0.651652	0.0844835	1.36842	-0.265306	0.470449	2.26875	2.05405	-0.374242	1.14286	1.2906	1.11828	1.41758
0.558559	0.11376	1.4067	-0.277243	0.498818	2.09375	1.91892	-0.383333	0.781513	1.47863	0.870968	1.13187
0.642643	0.0669176	1.24402	-0.274548	0.406619	2.10625	1.89189	-0.412626	0.89916	1.11966	0.88172	1.2967
0.543544	0.0911752	1.35885	-0.271082	0.520095	1.90625	1.85135	-0.407071	0.932773	1.13675	1.15054	1.35165
0.438438	0.0606441	1.16746	-0.283404	0.399527	2.025	1.78378	-0.400505	0.815126	1.04274	0.870968	1.13187
0.504505	0.0556253	1.18182	-0.264151	0.439716	1.775	1.58108	-0.403535	0.789916	1.2906	0.806452	1.03297
0.294294	0.0577164	1.13397	-0.237967	0.248227	1.83125	1.66216	-0.395455	0.613445	0.965812	0.806452	1
0.366366	0.04266	1.09569	-0.254524	0.3026	1.575	1.56757	-0.40202	0.983193	0.974359	0.924731	1
0.261261	0.0618988	1.00957	-0.29226	0.286052	1.73125	1.5	-0.406566	0.630252	1.00855	0.634409	0.736264
0.306306	0.0326223	0.947368	-0.276473	0.219858	1.6625	1.35135	-0.396465	0.546219	0.735043	0.72043	0.813187
0.243243	0.0221665	0.976077	-0.302272	0.191489	1.575	1.37838	-0.365657	0.386555	0.692308	0.569892	0.758242
0.186186	0.0158929	0.899522	-0.310358	0.293144	1.55625	1.2973	-0.404545	0.302521	0.760684	0.655914	1
0.192192	0.00878294	0.971292	-0.309973	0.200946	1.45625	1.36486	-0.379798	0.369748	0.811966	0.623656	0.857143
0.171171	0.0108741	0.770335	-0.333077	0.224586	1.45625	1.18919	-0.40404	0.386555	0.615385	0.634409	0.725275
0.0840841	-0.0129653	0.875598	-0.304197	0.293144	1.375	1.36486	-0.399495	0.210084	0.683761	0.655914	0.615385
0.177177	-0.0317859	0.779904	-0.279553	0.229314	1.28125	1.52703	-0.416162	0.310924	0.581197	0.752688	0.527473
0.0690691	-0.0359682	0.91866	-0.286869	0.274232	1.5	1.54054	-0.426768	0.226891	0.923077	0.591398	0.571429
0.0960961	-0.0539523	0.894737	-0.355795	0.238771	1.19375	1.71622	-0.427778	0.294118	0.615385	0.731183	0.692308
0.048048	-0.0547888	0.84689	-0.371968	0.0661939	1.275	1.58108	-0.417677	0.12605	0.846154	0.548387	0.527473
0.0510511	-0.0660811	0.937799	-0.403543	0.177305	1.275	1.7027	-0.423737	0.0588235	0.65812	0.623656	0.406593
0.033033	-0.0598076	0.827751	-0.415094	0.234043	1.225	1.75676	-0.44899	0.00840336	0.564103	0.483871	0.516484
0.027027	-0.0614806	0.779904	-0.41702	0.106383	1.075	1.56757	-0.457071	0.0672269	0.538462	0.537634	0.43956
-0.048048	-0.062317	0.827751	-0.435117	0.115839	1.11875	1.60811	-0.463131	0.0336134	0.735043	0.591398	0.483516
-0.027027	-0.0702635	0.866029	-0.452445	0.217494	1.06875	1.62162	-0.479798	-0.12605	0.803419	0.505376	0.538462
0.039039	-0.0451694	0.822967	-0.455141	0.219858	1.0375	1.54054	-0.470202	-0.0672269	0.606838	0.580645	0.527473
-0.0840841	-0.0832288	0.755981	-0.459376	0.189125	1.04375	1.52703	-0.473737	-0.159664	0.452991	0.688172	0.43956
-0.0570571	-0.0706817	0.746412	-0.443204	0.208038	0.975	1.45946	-0.466667	-0.168067	0.435897	0.516129	0.406593
-0.0660661	-0.0397323	0.827751	-0.445899	0.158392	0.94375	1.40541	-0.467172	-0.0840336	0.376068	0.516129	0.494505
-0.0750751	-0.0815558	0.741627	-0.461302	0.170213	0.96875	1.56757	-0.495455	0.0840336	0.264957	0.548387	0.703297
-0.0690691	-0.0849017	0.712919	-0.463227	0.122931	0.88125	1.40541	-0.50303	0.0252101	0.444444	0.537634	0.230769
-0.12012	-0.110414	0.741627	-0.461687	0.160756	0.8125	1.33784	-0.463131	0.0672269	0.393162	0.44086	0.32967
-0.153153	-0.150983	0.617225	-0.457836	0.0472813	1.0125	1.36486	-0.484848	-0.12605	0.264957	0.397849	0.208791
-0.138138	-0.215391	0.684211	-0.477089	0.0945626	0.93125	1.14865	-0.464646	-0.092437	0.350427	0.354839	0.527473
-0.0870871	-0.244668	0.578947	-0.479784	0.073286	0.85	1.2973	-0.475253	-0.0420168	0.444444	0.569892	0.241758
-0.174174	-0.261815	0.564593	-0.48556	0.0543735	0.78125	1.13514	-0.476768	-0.159664	0.358974	0.516129	0.373626
-0.144144	-0.285236	0.62201	-0.461687	0.120567	0.8125	1.17568	-0.463636	-0.12605	0.470085	0.397849	0.32967
-0.213213	-0.276035	0.535885	-0.472083	0.0118203	0.79375	1.21622	-0.480303	-0.184874	0.213675	0.397849	0.516484
-0.195195	-0.288164	0.650718	-0.505583	0.0661939	0.75625	1.06757	-0.482323	-0.092437	0.333333	0.462366	0.263736
-0.159159	-0.272271	0.636364	-0.506353	0.0591017	0.7875	1.04054	-0.494949	-0.12605	0.384615	0.419355	0.571429
-0.234234	-0.291928	0.511962	-0.505583	-0.0165485	0.70625	0.959459	-0.50202	-0.134454	0.307692	0.333333	0.307692
-0.252252	-0.290673	0.598086	-0.487101	-0.0212766	0.75625	0.945946	-0.490909	-0.0756303	0.401709	0.290323	0.175824
-0.273273	-0.297365	0.569378	-0.492876	-0.0969267	0.675	0.932432	-0.496465	-0.184874	0.25641	0.451613	0.362637
-0.3003	-0.283563	0.535885	-0.48479	-0.104019	0.63125	0.945946	-0.485859	-0.184874	0.264957	0.483871	0.0769231
-0.291291	-0.273526	0.631579	-0.508664	-0.120567	0.5875	0.824324	-0.497475	-0.134454	0.273504	0.505376	0.0549451
-0.276276	-0.29862	0.483254	-0.517905	-0.141844	0.68125	0.972973	-0.497475	-0.10084	0.247863	0.301075	0.120879
-0.312312	-0.286073	0.559809	-0.528302	-0.0874704	0.60625	0.932432	-0.50505	-0.268908	0.205128	0.344086	0.230769
-0.249249	-0.288582	0.598086	-0.534463	-0.179669	0.59375	0.77027	-0.515657	-0.260504	0.179487	0.419355	0.230769
-0.243243	-0.257633	0.555024	-0.526377	-0.210402	0.73125	0.810811	-0.529293	-0.210084	0.230769	0.268817	0.131868
-0.258258	-0.265997	0.555024	-0.533693	-0.217494	0.6125	0.72973	-0.531313	-0.12605	0.299145	0.301075	0.175824
-0.252252	-0.256796	0.488038	-0.530997	-0.200946	0.6125	0.797297	-0.506061	-0.134454	0.247863	0.172043	0.153846
-0.261261	-0.238394	0.665072	-0.542164	-0.212766	0.525	0.810811	-0.494444	-0.336134	0.239316	0.258065	-0.010989
-0.24024	-0.167712	0.449761	-0.528302	-0.130024	0.51875	0.648649	-0.511616	-0.109244	0.17094	0.311828	0.0879121
-0.285285	-0.184023	0.421053	-0.556411	-0.20331	0.6125	0.662162	-0.50101	-0.319328	0.222222	0.16129	0.186813
-0.261261	-0.180259	0.401914	-0.560262	-0.264775	0.6375	0.581081	-0.515152	-0.268908	0.25641	0.182796	0.0879121
-0.267267	-0.166876	0.406699	-0.559107	-0.120567	0.43125	0.702703	-0.526768	-0.201681	0.128205	0.258065	0.142857
-0.288288	-0.176495	0.296651	-0.561417	-0.193853	0.45625	0.540541	-0.534343	-0.252101	0.179487	0.333333	0.0659341
-0.288288	-0.224592	0.344498	-0.556411	-0.210402	0.475	0.72973	-0.548485	-0.252101	0.264957	0.301075	0.10989
-0.279279	-0.260979	0.296651	-0.576434	-0.174941	0.4375	0.662162	-0.540909	-0.252101	0.128205	0.215054	0.175824
-0.261261	-0.242158	0.397129	-0.574509	-0.141844	0.34375	0.72973	-0.533333	-0.243697	0.0769231	0.204301	0.175824
-0.276276	-0.212045	0.406699	-0.573739	-0.234043	0.3625	0.716216	-0.546465	-0.109244	0.0940171	0.27957	-0.032967
-0.291291	-0.192388	0.37799	-0.576434	-0.224586	0.4	0.675676	-0.550505	-0.243697	0.0940171	0.225806	0.164835
-0.282282	-0.205772	0.30622	-0.587601	-0.182033	0.475	0.756757	-0.515657	-0.327731	0.128205	0.344086	0.043956
-0.282282	-0.204099	0.349282	-0.596457	-0.189125	0.34375	0.513514	-0.532323	-0.243697	0.145299	0.0107527	0.0659341
-0.285285	-0.223756	0.373206	-0.598383	-0.212766	0.34375	0.621622	-0.557071	-0.336134	0.034188	0.268817	-0.032967
-0.279279	-0.231702	0.334928	-0.607624	-0.132388	0.375	0.486486	-0.54596	-0.176471	0.0512821	0.139785	-0.0549451
-0.336336	-0.256378	0.311005	-0.612245	-0.186761	0.4	0.554054	-0.554545	-0.361345	0.025641	0.16129	0.021978
-0.297297	-0.230866	0.416268	-0.605699	-0.182033	0.48125	0.445946	-0.546465	-0.252101	0.00854701	0.27957	-0.043956
-0.27027	-0.243413	0.363636	-0.607624	-0.231678	0.40625	0.527027	-0.54596	-0.218487	0.0769231	0.182796	-0.0989011
-0.291291	-0.263906	0.334928	-0.606854	-0.231678	0.5	0.567568	-0.561111	-0.302521	-0.034188	0.354839	0.0659341
-0.285285	-0.27018	0.444976	-0.620716	-0.255319	0.5125	0.621622	-0.557576	-0.159664	-0.025641	0.0537634	-0.0879121
-0.309309	-0.280636	0.344498	-0.61417	-0.21513	0.51875	0.513514	-0.573232	-0.336134	0.0683761	0.268817	0.0989011
-0.279279	-0.312003	0.339713	-0.624182	-0.210402	0.40625	0.459459	-0.579798	-0.201681	0.136752	0.0645161	-0.0989011
-0.243243	-0.333333	0.325359	-0.628417	-0.191489	0.4625	0.405405	-0.587374	-0.302521	-0.153846	0.150538	0.120879
-0.18018	-0.370556	0.296651	-0.631498	-0.196217	0.4625	0.405405	-0.569697	-0.285714	0.0683761	0.247312	-0.0549451
-0.132132	-0.425763	0.282297	-0.650366	-0.170213	0.51875	0.310811	-0.561111	-0.336134	-0.017094	0.311828	0.021978
-0.0690691	-0.399414	0.320574	-0.653446	-0.196217	0.5	0.486486	-0.547475	-0.243697	0.034188	0.258065	0.10989
0.033033	-0.315767	0.291866	-0.641895	-0.229314	0.525	0.459459	-0.536364	-0.302521	0.00854701	-0.0107527	0.131868
0.027027	-0.286073	0.354067	-0.64228	-0.222222	0.5125	0.391892	-0.55303	-0.302521	0	0.247312	0.0769231
0.0870871	-0.281472	0.301435	-0.638429	-0.276596	0.5	0.297297	-0.55505	-0.277311	-0.0940171	0.204301	0.0989011
0.0750751	-0.269343	0.416268	-0.641509	-0.245863	0.54375	0.364865	-0.55	-0.336134	-0.0683761	0.16129	0.0769231
0.159159	-0.289837	0.263158	-0.652676	-0.304965	0.50625	0.337838	-0.54596	-0.327731	0.017094	0.107527	0.032967
0.0690691	-0.27478	0.244019	-0.639199	-0.248227	0.56875	0.351351	-0.565152	-0.386555	0.128205	0.268817	0.131868
0.108108	-0.268507	0.287081	-0.661147	-0.293144	0.4	0.337838	-0.55505	-0.235294	-0.017094	0.0645161	-0.032967
0.162162	-0.24174	0.296651	-0.649981	-0.293144	0.53125	0.27027	-0.552525	-0.201681	-0.0940171	0.204301	0.032967
0.114114	-0.250105	0.272727	-0.658452	-0.29078	0.4875	0.337838	-0.571212	-0.327731	-0.034188	0.11828	0.0989011
0.0600601	-0.251777	0.301435	-0.663458	-0.231678	0.50625	0.256757	-0.552525	-0.386555	0.00854701	0.0645161	-0.0879121
0.0930931	-0.257215	0.296651	-0.670774	-0.333333	0.525	0.175676	-0.554545	-0.226891	-0.017094	0.0322581	-0.0769231
0.048048	-0.291928	0.330144	-0.665383	-0.368794	0.63125	0.256757	-0.55303	-0.310924	0.00854701	-0.0430108	0.0769231
0.0840841	-0.322041	0.258373	-0.675395	-0.293144	0.53125	0.243243	-0.570202	-0.310924	0.0854701	0.236559	-0.0879121
0.039039	-0.344626	0.248804	-0.680786	-0.309693	0.45625	0.216216	-0.573737	-0.327731	-0.0769231	0.150538	-0.0879121
0.0660661	-0.319113	0.258373	-0.691567	-0.295508	0.45	0.148649	-0.581818	-0.310924	-0.128205	0.0537634	-0.131868
0.126126	-0.313258	0.287081	-0.686561	-0.349882	0.45625	0.243243	-0.576263	-0.302521	-0.119658	0.0537634	-0.10989
0.036036	-0.329151	0.22488	-0.681171	-0.323877	0.53125	0.148649	-0.574242	-0.285714	-0.042735	0.16129	0.0989011
0.114114	-0.321205	0.23445	-0.6804	-0.321513	0.4625	0.175676	-0.570707	-0.268908	-0.025641	0.0967742	0.010989
0.0870871	-0.345044	0.248804	-0.666153	-0.333333	0.5125	0.148649	-0.565657	-0.294118	0.034188	0.129032	-0.153846
0.18018	-0.354245	0.330144	-0.664998	-0.300236	0.5875	0.256757	-0.564141	-0.302521	-0.025641	0.139785	-0.010989
0.0750751	-0.36972	0.349282	-0.681556	-0.330969	0.38125	0.148649	-0.565152	-0.235294	-0.034188	-0.0430108	-0.043956
0.0600601	-0.365956	0.253589	-0.701579	-0.338061	0.35625	0.189189	-0.583333	-0.277311	-0.0683761	0.0537634	0.21978
0.0690691	-0.371393	0.334928	-0.71005	-0.356974	0.35625	0.0405405	-0.587374	-0.285714	-0.042735	0.225806	-0.10989
0.003003	-0.37683	0.358852	-0.719677	-0.345154	0.45	0.108108	-0.563636	-0.336134	0.034188	0.0107527	-0.0879121
0.042042	-0.375993	0.181818	-0.734309	-0.364066	0.36875	0.027027	-0.570202	-0.378151	0.025641	0.0860215	0.032967
0.0630631	-0.350899	0.282297	-0.739315	-0.312057	0.49375	0.121622	-0.566667	-0.268908	-0.0598291	0.129032	-0.0879121
0.042042	-0.365537	0.162679	-0.74047	-0.338061	0.325	0.0135135	-0.554545	-0.310924	-0.017094	0.0537634	-0.175824
0.018018	-0.363028	0.258373	-0.731228	-0.399527	0.36875	0.027027	-0.553535	-0.344538	0.00854701	0.0752688	0.230769
-0.015015	-0.367629	0.23445	-0.746246	-0.397163	0.4	0.0135135	-0.557576	-0.268908	0.025641	0.0860215	-0.0989011
0.0660661	-0.383103	0.248804	-0.730843	-0.378251	0.35	-0.0945946	-0.499495	-0.386555	-0.042735	0.129032	-0.0989011
0.015015	-0.364283	0.239234	-0.733539	-0.439716	0.39375	0.0135135	-0.487374	-0.319328	-0.0598291	0.0537634	-0.0989011
-0.039039	-0.359682	0.220096	-0.730843	-0.451537	0.25	-0.135135	-0.490909	-0.336134	-0.034188	-0.0107527	-0.0989011
-0.015015	-0.373066	0.239234	-0.726223	-0.439716	0.50625	-0.0135135	-0.475758	-0.327731	0.025641	-0.0967742	0.043956
-0.0810811	-0.360519	0.282297	-0.723527	-0.439716	0.25625	-0.0810811	-0.457071	-0.344538	-0.0854701	0.0537634	0.021978
-0.00900901	-0.375575	0.248804	-0.70774	-0.434988	0.4375	0	-0.428283	-0.361345	-0.0598291	0.0107527	0.0879121
-0.0600601	-0.39816	0.244019	-0.688102	-0.427896	0.4	-0.027027	-0.475253	-0.361345	-0.0940171	0	-0.153846
-0.0540541	-0.39565	0.263158	-0.680015	-0.456265	0.325	0	-0.474747	-0.294118	-0.0940171	0.11828	0.021978
-0.024024	-0.38854	0.325359	-0.67732	-0.427896	0.23125	-0.0540541	-0.450505	-0.336134	-0.111111	0.182796	-0.0549451
-0.0720721	-0.400669	0.287081	-0.673084	-0.444444	0.33125	0.0405405	-0.440909	-0.260504	-0.0512821	-0.0107527	-0.197802
-0.0660661	-0.381012	0.37799	-0.67501	-0.423168	0.31875	0.0405405	-0.439394	-0.445378	-0.017094	0.204301	-0.0769231
-0.018018	-0.387704	0.23445	-0.663458	-0.399527	0.2125	0.027027	-0.438384	-0.386555	-0.017094	0.0322581	0.186813
-0.105105	-0.389377	0.291866	-0.64459	-0.444444	0.25625	-0.0135135	-0.420707	-0.319328	-0.119658	0.204301	-0.0879121
0.021021	-0.388122	0.37799	-0.638814	-0.392435	0.25625	-0.027027	-0.419192	-0.336134	-0.025641	0.0107527	-0.021978
-0.117117	-0.371811	0.253589	-0.64305	-0.425532	0.3125	-0.108108	-0.416162	-0.302521	-0.0854701	-0.0107527	-0.164835
-0.0600601	-0.391886	0.23445	-0.653061	-0.394799	0.25	0.0135135	-0.411111	-0.319328	-0.042735	0	-0.0659341
-0.0540541	-0.381849	0.291866	-0.655372	-0.43026	0.20625	-0.121622	-0.406061	-0.352941	-0.128205	0.150538	-0.0659341
-0.042042	-0.38394	0.229665	-0.652291	-0.385343	0.26875	-0.108108	-0.402525	-0.420168	-0.0512821	-0.0430108	-0.131868
-0.0660661	-0.401506	0.23445	-0.650751	-0.444444	0.23125	0.0675676	-0.415152	-0.319328	-0.025641	0.247312	-0.0769231
0.00900901	-0.420326	0.220096	-0.637659	-0.406619	0.175	-0.0810811	-0.435354	-0.369748	0.017094	0.0752688	-0.10989
-0.126126	-0.410289	0.277512	-0.633808	-0.44208	0.28125	-0.0945946	-0.436869	-0.394958	-0.0769231	0.172043	0.0879121
-0.108108	-0.374739	0.258373	-0.658067	-0.416076	0.29375	-0.0135135	-0.437374	-0.436975	0.0598291	0.236559	-0.0989011
-0.0960961	-0.386867	0.282297	-0.647285	-0.352246	0.1625	-0.108108	-0.438889	-0.369748	-0.0940171	0.0322581	-0.0549451
-0.108108	-0.383522	0.320574	-0.656527	-0.335697	0.2	0.135135	-0.426263	-0.327731	-0.025641	0.182796	-0.142857
-0.138138	-0.386449	0.277512	-0.661918	-0.338061	0.1375	0.0675676	-0.442929	-0.302521	-0.017094	0.150538	-0.10989
-0.135135	-0.379757	0.267943	-0.634193	-0.340426	0.16875	0.0405405	-0.464646	-0.378151	-0.0769231	-0.0645161	-0.164835
-0.162162	-0.402342	0.349282	-0.652291	-0.35461	0.225	0.0405405	-0.451515	-0.327731	-0.102564	0.0430108	-0.10989
-0.18018	-0.414471	0.277512	-0.636889	-0.297872	0.3375	0.0540541	-0.460101	-0.394958	-0.0598291	0.0537634	-0.230769
-0.207207	-0.404433	0.196172	-0.626107	-0.236407	0.225	0.148649	-0.434848	-0.319328	-0.0683761	0.16129	-0.10989
-0.144144	-0.404015	0.258373	-0.630343	-0.300236	0.28125	0.0945946	-0.444444	-0.310924	-0.034188	0.0537634	-0.021978
-0.138138	-0.387286	0.22488	-0.621101	-0.271868	0.30625	0.0945946	-0.436364	-0.436975	-0.0854701	0.107527	0.0769231
-0.225225	-0.450857	0.282297	-0.607624	-0.217494	0.19375	0.22973	-0.456061	-0.277311	-0.034188	0	0
-0.195195	-0.476788	0.229665	-0.594147	-0.269504	0.19375	0.283784	-0.443434	-0.403361	-0.017094	0.0752688	-0.186813
-0.192192	-0.483061	0.291866	-0.626492	-0.257683	0.2875	0.337838	-0.44596	-0.243697	0.00854701	0.0860215	-0.0989011
-0.219219	-0.492681	0.244019	-0.639199	-0.316785	0.25625	0.175676	-0.456566	-0.369748	-0.017094	0.0322581	-0.10989
-0.165165	-0.488917	0.191388	-0.64305	-0.345154	0.24375	0.202703	-0.429293	-0.285714	-0.0854701	-0.0215054	-0.131868
-0.225225	-0.498118	0.244019	-0.635734	-0.27896	0.24375	0.243243	-0.45505	-0.344538	-0.0598291	0.0967742	-0.120879
-0.234234	-0.499373	0.196172	-0.664613	-0.281324	0.15	0.216216	-0.49596	-0.378151	0.017094	0.0430108	-0.142857
-0.234234	-0.477206	0.181818	-0.673084	-0.255319	0.2375	0.216216	-0.488384	-0.201681	-0.042735	0.172043	-0.0769231
-0.192192	-0.4977	0.267943	-0.662303	-0.316785	0.16875	0.256757	-0.478788	-0.453782	-0.042735	0.0107527	-0.175824
-0.186186	-0.462986	0.23445	-0.669619	-0.3026	0.24375	0.297297	-0.487879	-0.277311	-0.042735	0.0860215	-0.197802
-0.288288	-0.467169	0.301435	-0.665768	-0.27896	0.1625	0.162162	-0.488384	-0.369748	-0.034188	-0.0107527	-0.142857
-0.21021	-0.468841	0.177033	-0.684636	-0.288416	0.1875	0.108108	-0.466667	-0.378151	0.0854701	0.182796	-0.274725
-0.273273	-0.462568	0.277512	-0.692722	-0.269504	0.0875	0.162162	-0.491919	-0.352941	0	-0.0537634	-0.131868
-0.261261	-0.461731	0.15311	-0.695803	-0.326241	0.2125	0.216216	-0.489394	-0.420168	0.145299	-0.0215054	-0.0659341
-0.27027	-0.465077	0.205742	-0.689642	-0.293144	0.11875	0.121622	-0.481313	-0.378151	-0.0940171	0.0430108	0.043956
-0.276276	-0.45504	0.210526	-0.685021	-0.288416	0.2125	0.22973	-0.486869	-0.327731	0	0.0537634	-0.120879
-0.276276	-0.461731	0.200957	-0.67886	-0.198582	0.125	0.121622	-0.494444	-0.277311	-0.111111	0	-0.0549451
-0.207207	-0.482225	0.15311	-0.684251	-0.326241	0.25	0.148649	-0.504545	-0.294118	0.034188	0.0215054	0
-0.291291	-0.482225	0.263158	-0.685021	-0.338061	0.075	0.243243	-0.485859	-0.336134	0.179487	0.0967742	-0.0659341
-0.216216	-0.485153	0.186603	-0.702349	-0.338061	0.16875	0.216216	-0.517677	-0.436975	-0.0769231	-0.11828	-0.142857
-0.306306	-0.517775	0.133971	-0.701579	-0.316785	0.1	0.162162	-0.50101	-0.319328	0.034188	0.11828	-0.10989
-0.309309	-0.508992	0.157895	-0.695803	-0.361702	0.075	0.162162	-0.504545	-0.277311	0.00854701	-0.0215054	-0.142857
-0.315315	-0.529904	0.162679	-0.685406	-0.401891	0.15	0.27027	-0.525253	-0.352941	-0.017094	0.139785	-0.131868
-0.297297	-0.527394	0.239234	-0.697728	-0.338061	0.1	0.297297	-0.507071	-0.210084	-0.0769231	0.107527	-0.10989
-0.261261	-0.50941	0.23445	-0.696188	-0.451537	0.1	0.202703	-0.473232	-0.352941	0.0683761	-0.0215054	-0.263736
-0.309309	-0.517357	0.258373	-0.695033	-0.411348	0.2125	0.256757	-0.50101	-0.302521	-0.042735	-0.0645161	-0.10989
-0.339339	-0.506483	0.253589	-0.70851	-0.385343	0.1	0.162162	-0.540404	-0.361345	0.025641	0.0537634	-0.21978
-0.378378	-0.521539	0.148325	-0.687332	-0.385343	0.1125	0.189189	-0.574748	-0.302521	0.00854701	0.107527	-0.0879121
-0.402402	-0.517357	0.248804	-0.688872	-0.432624	0.05625	0.391892	-0.623737	-0.378151	-0.00854701	0.0107527	-0.0879121
-0.399399	-0.516939	0.133971	-0.697728	-0.446809	0.09375	0.243243	-0.656566	-0.361345	-0.111111	0.0430108	-0.0879121

## Sheet: single-same
15.4.2024				18.4.2024								22.04.2024
worm5	worm6	worm7	worm8	worm1	worm2	worm4	worm5		worm6		worm7	worm1	worm2		worm4	worm5
video10-a	video13-a	video16-p	video20	vide2	video3	video10	video13-a	video15-p	video18-p	video19-a	video22-a	video1	video5-a	video8-p	video12	video15
-1	-1	-1	-1	-1	-1	-1	-1	-1	-1	-1	-1	-1	-1	-1	-1	-1
0.180328	-0.115385	0.5	-0.215925	0.267442	0.228322	0.173759	0.205765	0.192635	0.204762	0.0644068	-0.010582	0.351759	0.117284	0.042471	0.107595	0.0658683
0.245902	0.153846	0.430279	-0.258548	0.174419	0.194257	0.22695	0.190552	0.243626	0.12381	0	0.0529101	0.165829	0.228395	0.050193	-0.0126582	0.0389222
0.204918	0.0769231	0.356574	-0.296955	-0.0930233	0.138795	0.159574	0.144115	0.230878	0.1	-0.0847458	0.00529101	0.18593	0.0555556	0.015444	0.120253	0.0988024
0.188525	0.0769231	0.366534	-0.308197	-0.151163	0.10839	0.170213	0.158527	0.211048	0.166667	0.0338983	-0.021164	0.0653266	0.0802469	-0.011583	0.158228	0.0988024
0.139344	0.153846	0.324701	-0.275878	0.0465116	0.0788288	0.131206	0.102482	0.205382	0.0857143	-0.0813559	0.132275	0.276382	0.0802469	-0.019305	-0.0379747	0.107784
0.180328	0.0769231	0.324701	-0.232319	-0.0232558	0.0827703	0.202128	0.142514	0.196884	0.0571429	-0.0508475	-0.021164	0.19598	0.203704	-0.011583	0.107595	0.0329341
0.139344	0.0961538	0.286853	-0.209368	0.0581395	0.0681306	0.191489	0.106485	0.229462	0.052381	-0.0440678	0.031746	0.080402	0.0740741	0.023166	-0.0886076	0.0449102
0.188525	0.0961538	0.268924	-0.159251	0.0813954	0.0374437	0.120567	0.0800641	0.18272	0.052381	-0.0644068	-0.021164	0.0552764	0.148148	0.0772201	-0.0443038	-0.0718563
0.147541	0.211538	0.268924	-0.0838408	-0.0581395	0.0456081	0.0141844	0.0632506	0.0892351	-0.0238095	-0.020339	0.0529101	0.0251256	0.0185185	-0.027027	-0.00632911	-0.0269461
0.0819672	-0.0576923	0.233068	-0.000468384	0	0.00563063	0.0744681	0.0344275	0.113314	-0.0428571	-0.0847458	0.0846561	0.0201005	0.0246914	0.023166	0.056962	-0.0389222
0.0737705	0.0192308	0.2251	0.0468384	-0.162791	-0.0098536	0.0673759	0.0040032	0.104816	0.0380952	-0.108475	0.00529101	0.145729	0.00617284	0.027027	0.0696203	-0.0329341
0.0245902	0.0192308	0.201195	0.0683841	-0.0930233	0.0152027	0.0390071	0.0352282	0.103399	-0.0238095	-0.115254	-0.00529101	-0.0150754	-0.0246914	-0.0540541	0.101266	0.0838323
0.00819672	-0.0769231	0.201195	0.102576	-0.0697674	0.0529279	0.035461	0.0176141	0.167139	-0.0285714	-0.149153	-0.00529101	-0.0351759	0.135802	-0.0733591	0.0506329	-0.0508982
0.0983607	0.0769231	0.179283	0.133021	-0.127907	0.0298423	0.0319149	0.0360288	0.110482	-0.0047619	-0.105085	-0.021164	0.0251256	0.0246914	0.003861	-0.0379747	-0.00299401
0.00819672	-0.0192308	0.191235	0.112881	0.104651	0.0596847	0.106383	0	0.195467	-0.0285714	-0.0915254	0	0.0854271	0	-0.0617761	-0.0506329	-0.101796
0	0	0.151394	0.111475	-0.0581395	0.0413851	0.0602837	0.0040032	0.194051	-0.0047619	-0.159322	-0.026455	0.0150754	-0.037037	-0.0694981	-0.0126582	-0.0958084
0	0.0961538	0.185259	0.133021	0.104651	0.0230856	0.131206	-0.00320256	0.117564	-0.0571429	-0.132203	-0.111111	-0.0502513	-0.117284	0.019305	0.120253	-0.0898204
0	0	0.199203	0.11897	0.0348837	0.0202703	0.0460993	0.0656525	0.135977	-0.1	-0.122034	-0.0634921	0.0150754	-0.037037	0.050193	0	-0.0958084
0.0491803	-0.115385	0.177291	0.10445	0.0116279	0.0205518	0.0390071	-0.00640512	0.148725	0	-0.125424	-0.126984	-0.0703518	0	-0.0733591	0.0696203	-0.110778
0.00819672	-0.0192308	0.141434	0.136768	-0.0465116	0.0546171	0.156028	0.00160128	0.0892351	-0.0142857	-0.0711864	-0.137566	0.040201	0	0.030888	0.0696203	-0.0479042
-0.0655738	0.134615	0.141434	0.0978923	-0.0465116	0.115991	-0.0460993	-0.00800641	0.133144	-0.047619	-0.0881356	-0.126984	-0.0150754	0.0246914	0.015444	0	-0.10479
0.0327869	0.0384615	0.149402	0.127869	-0.0697674	0.146396	0.0319149	0.00080064	0.117564	-0.0571429	-0.101695	-0.116402	-0.105528	-0.0432099	-0.0888031	0.107595	-0.0898204
-0.0163934	0.0769231	0.143426	0.0941452	-0.0348837	0.196791	-0.0070922	-0.0296237	0.0623229	0.0047619	-0.128814	-0.164021	0.0552764	-0.0555556	-0.011583	0.0316456	-0.116766
0.0245902	0.0192308	0.131474	0.105386	0.0232558	0.221565	-0.0319149	-0.0304243	0.113314	0.0142857	0.0101695	-0.116402	0.0954774	-0.0802469	0.015444	-0.00632911	-0.0538922
-0.0163934	-0.115385	0.129482	0.0637002	-0.0232558	0.217624	0.0070922	-0.0560448	0.152975	0.0238095	-0.125424	-0.111111	0.0452261	-0.17284	-0.023166	0.0886076	-0.0568862
0.0491803	-0.115385	0.109562	0.0566745	-0.0348837	0.197072	-0.0248227	-0.0368295	0.113314	0.0142857	-0.128814	-0.042328	0.0251256	-0.0308642	-0.0772201	0.00632911	-0.0299401
0.0245902	0.153846	0.121514	0.0721311	0.0697674	0.178773	-0.0851064	-0.00880705	0.0793201	0.12381	-0.0576271	-0.0952381	-0.00502513	-0.0617284	-0.0772201	0.0632911	-0.0389222
-0.0327869	0.0384615	0.105578	0.0501171	-0.0232558	0.180743	-0.0496454	0.00080064	0.109065	0.0952381	-0.0542373	-0.047619	0.0954774	-0.197531	-0.108108	0.0886076	0.00898204
-0.0737705	0.0769231	0.111554	0.0327869	-0.0348837	0.163851	-0.0390071	-0.0184147	0.106232	0.0142857	-0.0338983	-0.0952381	-0.0100503	0.0308642	-0.0656371	0.00632911	-0.011976
-0.0245902	-0.0961538	0.101594	0.0501171	0.104651	0.219876	-0.0283688	0.00800641	0.0609065	0.128571	-0.0372881	0.0529101	0.0351759	-0.17284	-0.042471	0.189873	-0.0359281
0.0409836	-0.0961538	0.123506	0.0299766	0.0581395	0.199324	0.0283688	0.0152122	0.0906516	0.161905	-0.0508475	-0.0529101	0.0502513	-0.0740741	-0.00772201	0.0379747	-0.00898204
-0.0327869	0.0961538	0.0896414	0.0637002	0.197674	0.19848	-0.0567376	0.0280224	0.0892351	0.138095	-0.0711864	-0.0634921	0.0150754	-0.0617284	-0.015444	0.0506329	-0.0269461
-0.0409836	-0.173077	0.0856574	0.0459016	0.0232558	0.156813	-0.0602837	-0.0472378	0.092068	0.209524	-0.0338983	-0.042328	0.0753769	-0.160494	-0.030888	0.126582	0.0808383
-0.00819672	-0.115385	0.0657371	0.0473068	0.0581395	0.15991	-0.0425532	-0.0480384	0.0637394	0.109524	-0.00338983	-0.047619	0.125628	-0.0123457	-0.030888	0.0443038	0.0658683
-0.0163934	-0.134615	0.0916335	0.0285714	-0.0930233	0.145552	-0.0248227	-0.00800641	0.0878187	0.128571	0.0101695	-0.026455	0.135678	-0.104938	-0.003861	0	0.0149701
-0.0491803	-0.0384615	0.0956175	0.0337237	-0.0697674	0.128097	-0.0780142	0.0040032	0.0311615	0.0904762	0.0508475	0.126984	0.150754	0.0246914	0.023166	0.0189873	0.0239521
-0.0245902	-0.173077	0.0398406	0.0505855	-0.104651	0.120495	-0.0851064	0.0328263	0.0736544	0.1	-0.0169492	-0.037037	0.226131	-0.117284	0.023166	0.259494	0.00598802
0.0245902	-0.153846	0.0557769	0.0454333	0.0930233	0.142455	-0.0177305	0.0448359	0.00141643	0.12381	0.108475	0.100529	0.120603	-0.0617284	-0.015444	0.0126582	-0.0269461
-0.0491803	0	0.0438247	0.0562061	0.0813954	0.112894	-0.0177305	0.0888711	0.0524079	0.0666667	0.0847458	0.0687831	0.165829	-0.135802	-0.023166	0.151899	0.00598802
-0.0163934	-0.153846	0.0438247	0.0459016	0.0232558	0.107827	-0.0390071	0.0704564	0.111898	0.109524	0.020339	0.111111	0.170854	-0.0617284	0.015444	0.170886	-0.0359281
0	0	0.0776892	0.0655738	-0.0465116	0.106137	-0.0319149	0.0384307	0.0637394	0.128571	0.135593	0.179894	0.130653	-0.0617284	-0.034749	0.0379747	0.0778443
-0.0163934	-0.0961538	0.0577689	0.0566745	0.0930233	0.0681306	-0.0815603	0.0152122	0.00566572	-0.00952381	0.0338983	0.37037	0.226131	0.123457	-0.042471	0.132911	0.0449102
-0.0819672	-0.153846	0.0358566	0.0754098	-0.0116279	0.0563063	0.0283688	0.0240192	-0.0580737	0.0142857	0.122034	0.227513	0.0603015	-0.0246914	-0.042471	0.0759494	-0.0389222
-0.0901639	-0.153846	0.0219124	0.0819672	0.104651	0.0568694	-0.0212766	0.0840673	-0.00141643	0.0333333	0.0915254	0.222222	0.0452261	0.0246914	-0.0617761	0.0696203	-0.0209581
-0.106557	0.0384615	0.0358566	0.0416862	0.0581395	0.0396959	-0.035461	0.0104083	-0.0113314	0.0428571	0.0542373	0.185185	0.0753769	-0.0925926	0.011583	0.056962	0.0479042
-0.0901639	0.0769231	0.0159363	0.0824356	-0.116279	0.0658784	-0.0531915	0.0544436	-0.00991501	-0.0428571	0.0338983	0.137566	0.0452261	0.0123457	-0.015444	0.113924	0.0449102
-0.0245902	0.134615	0.0398406	0.0782201	0.197674	0.0295608	-0.0319149	0.0432346	-0.0141643	-0.0666667	0.0169492	0.238095	0.0201005	0.0555556	0.03861	0.00632911	0.0658683
0.0163934	-0.0384615	0.00796813	0.0697892	-0.139535	0.0213964	-0.0744681	-0.00640512	0.0325779	-0.00952381	0.0915254	0.10582	-0.0452261	0.00617284	-0.050193	0.139241	0.0419162
-0.0737705	0	-0.00199203	0.0674473	0.0813954	0.0391329	-0.0780142	0.0584468	0.0127479	-0.0190476	0.142373	0.148148	-0.0251256	0.0432099	-0.03861	0.202532	-0.0179641
-0.0491803	0.211538	0	0.0477752	0.0581395	0.0295608	-0.0425532	0.0560448	-0.00141643	-0.114286	0.118644	0.248677	0.135678	0.123457	-0.00772201	0.0506329	0.0628743
-0.0819672	0.0961538	-0.00199203	0.0393443	0.0232558	0.00506757	-0.113475	0.0296237	-0.0609065	-0.185714	0.108475	0.169312	-0.0904523	-0.037037	0.019305	0.0253165	0.0568862
-0.0655738	-0.0961538	0.00796813	0.0154567	0.186047	-0.00872748	-0.0212766	0.0808647	-0.0566572	-0.138095	0.0813559	0.206349	0.135678	-0.0246914	0.00772201	0.101266	0.0778443
-0.0491803	-0.0961538	0.00796813	0.0355972	-0.0465116	0	-0.0035461	0.011209	-0.00424929	-0.128571	0.0101695	0.222222	-0.0150754	0	0.03861	0.208861	-0.011976
0.131148	0.0384615	-0.00796813	0.00796253	0.162791	-0.00197072	-0.0567376	0.00160128	-0.0240793	-0.128571	0.0677966	0.111111	-0.0301508	-0.0123457	-0.00772201	-0.0189873	0
0.0245902	-0.173077	-0.0278884	0.0782201	0.0116279	-0.0168919	-0.0248227	-0.0184147	0.01983	0	0.111864	0.0582011	0.0251256	0.0617284	0.027027	0.056962	0.0449102
-0.0409836	-0.0769231	-0.0378486	0.0866511	-0.0813954	-0.0244932	-0.0744681	-0.0120096	0	-0.00952381	-0.020339	0.0582011	-0.0653266	0.0864198	-0.0617761	0.0696203	-0.0658683
-0.0409836	0	-0.0278884	0.040281	-0.0697674	-0.0171734	-0.0567376	-0.00480384	-0.00566572	-0.114286	0	0.0582011	-0.0703518	-0.111111	-0.027027	0	0.0538922
0.00819672	0	-0.0398406	0.0412178	0	-0.0427928	-0.0212766	-0.00480384	-0.0283286	-0.0761905	0.0101695	0.00529101	-0.0603015	-0.0123457	-0.019305	-0.0189873	0.0898204
0.0163934	-0.0769231	-0.0398406	0.00187354	0.0232558	-0.0433559	-0.0141844	0.00240192	-0.0694051	-0.0809524	-0.0135593	0.126984	-0.105528	-0.117284	0.0617761	0.0316456	0.0329341
-0.00819672	-0.0961538	-0.0258964	-0.0224824	-0.0930233	-0.0380068	-0.0531915	-0.0496397	-0.0269122	-0.104762	0.0338983	0.0952381	-0.0653266	-0.0925926	-0.003861	-0.0443038	-0.00598802
-0.0245902	-0.0384615	-0.0916335	-0.000936768	-0.0581395	-0.0453266	0.0567376	-0.0320256	-0.0594901	-0.0047619	0.0101695	0.121693	0	-0.0740741	-0.03861	-0.0189873	0
0.00819672	-0.192308	-0.0737052	-0.00562061	0.127907	-0.0489865	-0.0177305	-0.0736589	-0.0637394	0.0238095	-0.00677966	0.0529101	0.040201	0.0432099	0.015444	-0.0189873	0.0628743
-0.0901639	-0.115385	-0.061753	-0.036534	0.0930233	-0.0416667	-0.0248227	-0.0120096	-0.029745	0.0380952	-0.00677966	0	-0.0301508	0.0493827	0.015444	-0.0443038	0.0329341
-0.0409836	-0.134615	-0.0298805	0	0.0348837	-0.0903716	-0.035461	-0.0208167	-0.0708215	-0.0190476	-0.0915254	0.132275	0.0150754	0	0.011583	-0.158228	-0.00598802
0.0409836	-0.134615	-0.0697211	-0.0145199	0.197674	-0.0568694	0	0.00800641	-0.0538244	0.0380952	0.00677966	0.010582	-0.0351759	0.0308642	-0.003861	-0.0632911	0.0479042
0.0245902	-0.192308	-0.061753	-0.0028103	-0.0813954	-0.057714	0.035461	0.0256205	-0.0665722	-0.0571429	-0.00677966	0.195767	-0.0251256	0.0246914	-0.034749	-0.0379747	0.0508982
0	-0.115385	-0.0458167	-0.0459016	0.0348837	-0.0917793	0.0390071	-0.0328263	0.01983	-0.052381	0.020339	0.111111	-0.0552764	0.00617284	-0.015444	-0.0253165	0.0359281
-0.00819672	-0.192308	-0.0517928	-0.00749415	0.0348837	-0.0765766	0.0035461	-0.0488391	-0.0566572	0.0714286	0.00338983	0.0634921	-0.0150754	-0.0123457	-0.030888	-0.0949367	0.0209581
0.0163934	-0.0769231	-0.0697211	-0.0168618	0	-0.115709	0.0106383	-0.0128102	-0.00849858	0.152381	0.0101695	0.0899471	0	-0.0246914	0.169884	-0.158228	0.00898204
0	-0.0769231	-0.063745	-0.00515223	-0.139535	-0.121622	0.0567376	-0.0240192	-0.0254958	0.185714	0.132203	0.126984	0.0201005	0.0555556	0.0617761	-0.151899	0.00898204
0.0163934	-0.134615	-0.0776892	-0.0107728	-0.139535	-0.137669	0	-0.0136109	-0.00566572	0.0809524	-0.0237288	-0.0529101	-0.140704	-0.0246914	0.030888	-0.158228	0.0688623
0.0819672	-0.192308	-0.103586	-0.012178	0.0581395	-0.144144	-0.0390071	0.0040032	-0.0127479	0.052381	0.0576271	-0.0634921	-0.165829	0	0.027027	-0.208861	0.0449102
0.0327869	-0.0769231	-0.105578	-0.00608899	0.139535	-0.153998	-0.0070922	0.0120096	0.00991501	0.147619	-0.0271186	0.021164	0.00502513	0.12963	0.0772201	-0.120253	0.0359281
0.0327869	-0.0576923	-0.103586	-0.0271663	0.0930233	-0.161881	0.0567376	-0.0168135	-0.00424929	0.171429	-0.0305085	-0.026455	-0.0150754	0.17284	0.046332	-0.0443038	0.011976
0	-0.0192308	-0.12749	0	0.0232558	-0.161318	0.0177305	-0.0152122	-0.00566572	0.138095	0.0101695	0	-0.0251256	0.117284	0.034749	-0.126582	0
0	-0.115385	-0.113546	-0.0318501	-0.104651	-0.162444	0.0496454	0.0104083	0.0495751	0.12381	0.0338983	0.0687831	-0.0753769	0.154321	0.15444	-0.0443038	0.0868263
-0.0409836	0.0961538	-0.105578	-0.0355972	0.0116279	-0.160755	-0.0460993	0.0240192	-0.0269122	0.138095	0.0576271	0.021164	-0.115578	0.0555556	0.108108	-0.208861	0.0359281
-0.0655738	0.0769231	-0.129482	-0.0370023	-0.0581395	-0.168919	-0.0319149	0.00960769	0.00141643	0.052381	0.00677966	-0.015873	-0.105528	0.148148	-0.015444	-0.132911	0.101796
-0.0245902	0.0576923	-0.0916335	-0.0477752	-0.0116279	-0.165822	0.0035461	-0.00160128	-0.0141643	0.0761905	0.0440678	-0.0687831	-0.0954774	0.0617284	-0.034749	-0.107595	0.0329341
-0.0245902	0.0769231	-0.123506	-0.0482436	-0.0232558	-0.175113	-0.0886525	0.00800641	0	0.052381	-0.00677966	-0.037037	-0.0150754	0.0802469	0.027027	-0.120253	-0.0359281
-0.0163934	-0.0192308	-0.139442	-0.0697892	-0.0348837	-0.213682	-0.124113	-0.0168135	-0.00708215	0.133333	-0.0372881	0.00529101	-0.0452261	0.0802469	0.015444	-0.151899	-0.00898204
-0.0327869	-0.0384615	-0.135458	-0.0651054	0.0232558	-0.164414	-0.113475	-0.0104083	-0.0495751	-0.00952381	-0.0576271	-0.121693	-0.040201	0.0864198	0.042471	-0.158228	0.0658683
0	-0.0384615	-0.113546	-0.076815	-0.0930233	-0.156532	-0.0319149	-0.0544436	-0.0127479	0.0333333	0.0508475	-0.031746	0	0.0864198	0.00772201	-0.158228	-0.0808383
-0.0163934	-0.0576923	-0.0976096	-0.0407494	0.0348837	-0.105293	-0.109929	-0.0288231	-0.00141643	-0.0238095	0.0542373	-0.00529101	-0.0854271	0.0679012	0.050193	-0.0189873	-0.0628743
0.0655738	-0.0576923	-0.103586	-0.0632318	0.0697674	-0.0827703	0.0141844	-0.0208167	-0.0453258	0.0047619	0.00677966	0.021164	-0.080402	-0.0123457	0.003861	-0.107595	-0.0479042
0.0163934	0.0961538	-0.0996016	-0.0721311	-0.151163	-0.116836	-0.0177305	-0.0232186	-0.00991501	-0.0142857	0.0949153	0.00529101	-0.0753769	-0.117284	0.046332	-0.0886076	-0.0508982
-0.0245902	0	-0.121514	-0.0510539	-0.0813954	-0.109234	0.0177305	-0.00720576	-0.0807365	-0.0857143	0.0915254	-0.015873	-0.135678	-0.00617284	0.019305	-0.056962	0.0359281
0.00819672	0.0576923	-0.123506	-0.0398126	0	-0.114302	0.152482	0.0160128	-0.0509915	-0.0380952	0.00338983	-0.047619	0.080402	-0.0432099	-0.027027	-0.0316456	0
0	0.134615	-0.0836653	-0.0594848	0.0581395	-0.0810811	0.156028	-0.0440352	-0.0892351	-0.0380952	0.0101695	-0.148148	-0.0502513	0	0.0733591	-0.139241	-0.0628743
0.0327869	0.288462	-0.115538	-0.0632318	-0.22093	-0.118525	0.191489	-0.0256205	-0.0467422	-0.00952381	0.105085	-0.042328	-0.110553	-0.037037	-0.011583	-0.0886076	-0.0149701
0	0.134615	-0.119522	-0.058548	-0.186047	-0.11205	0.141844	-0.0352282	-0.0849858	-0.0428571	-0.0101695	-0.15873	0.0100503	0.0493827	0.0540541	0.0253165	-0.0718563
-0.0491803	-0.0192308	-0.145418	-0.0355972	-0.162791	-0.0988176	0.0957447	-0.0344275	-0.0779037	-0.0857143	0.040678	-0.169312	-0.115578	-0.0246914	0.030888	-0.056962	-0.0568862
0.0327869	0.153846	-0.14741	-0.0318501	0.0348837	-0.0748874	0.120567	-0.0144115	-0.0552408	-0.0142857	0.0372881	-0.179894	-0.0854271	-0.037037	-0.019305	-0.126582	-0.0239521
0.0409836	0.0576923	-0.157371	-0.0309133	0.0348837	-0.0588401	0.0886525	-0.0392314	0.00424929	-0.0571429	-0.0338983	-0.142857	-0.110553	-0.0617284	0	0.0316456	-0.0179641
0.0491803	0.0192308	-0.119522	-0.0487119	-0.197674	-0.026464	0.0567376	-0.0120096	-0.0566572	-0.0333333	0.0135593	0.0634921	0.00502513	-0.0987654	0.050193	-0.056962	-0.0419162
0.0163934	0.115385	-0.131474	-0.0744731	-0.0581395	-0.0219595	0.152482	-0.0736589	-0.0835694	-0.0619048	-0.0813559	-0.0846561	-0.0753769	-0.037037	0.050193	-0.0696203	0.0179641
0.0655738	0.0961538	-0.161355	-0.0693208	0.197674	-0.0185811	0.0851064	-0.0480384	-0.0934844	-0.0714286	0.0677966	-0.010582	-0.0502513	-0.0802469	-0.0656371	0.0379747	-0.0269461
0.0163934	0.115385	-0.12749	-0.0608899	0.116279	-0.040259	0.0319149	-0.031225	-0.0538244	-0.0761905	-0.0338983	-0.0899471	-0.0954774	-0.117284	-0.015444	0.0506329	-0.0898204
0.0409836	0.153846	-0.133466	-0.0571429	-0.0116279	-0.0678491	0.0780142	-0.0544436	-0.124646	-0.0285714	-0.0644068	-0.206349	0.00502513	-0.0308642	0.03861	-0.0696203	0
0.0491803	0.0192308	-0.141434	-0.0604215	0	-0.0594032	0.0460993	-0.0320256	-0.113314	-0.0285714	-0.101695	-0.21164	-0.0502513	-0.0617284	0.019305	-0.0126582	0.00598802
0.106557	-0.0961538	-0.151394	-0.0529274	-0.0581395	-0.0734797	0.134752	-0.146517	-0.0637394	0.047619	-0.410169	-0.227513	-0.0301508	-0.0740741	0.015444	0	-0.116766
0.0737705	0.0384615	-0.135458	-0.0711944	-0.0813954	-0.0965653	0.173759	0.0568455	-0.0339943	0.0619048	-0.254237	-0.15873	-0.105528	-0.166667	-0.015444	0.28481	-0.0658683
-0.147541	-0.0769231	-0.374502	-0.0740047	0.0348837	-0.119651	0.195035	0.310649	-0.104816	0.0619048	-0.145763	-0.142857	-0.150754	-0.148148	-0.003861	0.575949	-0.0508982
0.262295	0	-0.105578	0.0360656	0.0930233	-0.153998	-0.297872	0.63811	-0.392351	0.185714	0.115254	-0.179894	0.040201	0.265432	-0.003861	1.22785	-0.131737
0.47541	-0.0384615	-0.0796813	0.153162	0.197674	0.00197072	-0.0531915	0.907926	0.213881	0.780952	0.308475	0.132275	0.135678	0.67284	-0.11583	2.12025	0.11976
0.762295	0.288462	-0.0318725	0.375176	0.593023	0.128941	0	1.34347	0.522663	1.9	0.522034	0.312169	0.366834	1.75926	0.216216	2.86709	0.922156
1.19672	0.538462	0.0298805	0.681499	0.895349	0.27393	0.195035	1.72538	0.681303	2.74286	0.562712	0.661376	0.537688	2.3642	0.837838	3.87975	1.49701
1.54098	0.692308	0.103586	0.912412	1.17442	0.410473	0.0780142	2.03843	0.973088	3.77619	0.728814	0.936508	0.919598	3.01235	1.50193	4.25949	2.30539
2.06557	1.15385	0.123506	1.07447	1.82558	0.570383	0.035461	2.40993	1.21955	4.72857	0.694915	1.41799	1.07538	3.71605	2.0193	5.18354	3.07186
2.51639	1.80769	0.181275	1.12927	1.95349	0.666104	0.117021	2.69095	1.51983	5.37619	0.745763	1.54497	1.05025	4.55556	2.57915	5.62658	3.6497
2.81967	1.94231	0.282869	1.24824	2.43023	0.744088	0.177305	3.09367	1.68272	5.78095	0.80678	1.74074	1.35678	5.2037	3.37066	6.13291	4.06886
3.21311	2.28846	0.320717	1.41499	2.54651	0.863457	0.198582	3.2546	1.81586	5.77619	0.772881	2.02645	1.39196	5.71605	4.05405	6.39873	4.29641
3.44262	2.53846	0.394422	1.4829	2.72093	0.947072	0.223404	3.6229	1.92635	6	0.738983	1.90476	1.51256	6.28395	4.76834	6.57595	4.70359
3.59016	2.65385	0.408367	1.45948	2.94186	1.04645	0.152482	3.74059	2.11898	5.81429	0.776271	1.99471	1.67337	6.44444	5.35521	7.27215	4.88024
3.63115	2.98077	0.416335	1.4623	3.22093	1.12528	0.148936	4.05284	2.49008	5.74762	0.820339	2.13757	1.38693	6.59877	5.7027	6.82278	4.96108
3.71311	3.07692	0.501992	1.50585	2.95349	1.18947	0.191489	4.30665	2.53541	5.58095	0.928814	2.30688	1.52764	7.10494	6.17761	7.27848	5.15868
3.70492	3.19231	0.511952	1.51288	3.0814	1.23283	0.159574	4.498	2.60482	5.82857	0.854237	2.04233	1.41709	7.34568	6.67181	7.31646	5.07186
3.59836	3.25	0.587649	1.48852	3.46512	1.30434	0.109929	4.89672	2.70397	5.88571	0.884746	2.09524	1.50754	7.58642	6.82239	7.53165	5.06886
3.56557	3.30769	0.557769	1.5007	3.26744	1.3522	0.0851064	5.09928	2.74929	6.10952	0.813559	1.92593	1.41709	7.6358	7.05019	7.39241	4.92216
3.47541	3.53846	0.605578	1.48571	3.45349	1.43159	0.138298	5.16813	2.9136	6.29524	0.766102	1.96825	1.40704	7.88889	7.08108	7.20253	5.05689
3.43443	3.42308	0.657371	1.41593	3.09302	1.57404	0.170213	3.40192	3.03966	6.39524	1.10169	1.93651	1.47236	7.64815	7.21622	6.75949	5.14671
3.31967	3.63462	0.653386	1.36253	3.11628	1.59375	0.187943	5.76861	3.10482	6.59048	1.8339	1.8836	1.35176	8.27778	7.28571	8.20886	5.09581
2.2377	3.67308	0.292829	1.43185	3.44186	1.62331	0.219858	5.8703	3.25212	6.88571	2.23729	1.68254	1.06533	8	7.18147	8.50633	4.98503
2.78689	4	0.737052	0.760187	2.27907	1.34657	0.368794	6.03603	2.31303	3.29048	2.58305	1.43386	1.44724	5.41358	7.57915	8.43038	4.21257
2.61475	3.98077	0.74502	0.912881	2.87209	1.64245	1.07092	6.09768	3.87819	6.34286	2.75932	1.86772	1.48744	4.98148	4.48649	8.20253	3.88323
2.71311	3.86538	0.760956	0.91897	2.62791	1.71396	0.946809	6.19055	3.76346	7.29048	2.86102	1.89418	1.48241	4.73457	7.27799	8.37975	3.61677
2.68852	3.75	0.750996	0.912412	2.7093	1.72748	1	6.17134	3.60907	7.21429	3.24407	1.60317	1.52261	5.01235	7.0888	7.81646	3.82635
2.69672	3.96154	0.798805	0.884778	2.66279	1.7652	1.23404	6.253	3.56091	6.61429	3.31186	1.79365	1.42211	4.78395	6.72201	7.51266	3.63174
2.64754	3.86538	0.762948	0.853864	2.52326	1.69876	1.41844	6.2522	3.517	6.45714	3.37288	1.7619	1.71357	4.91975	6.98842	7.24684	3.83234
2.59836	3.69231	0.762948	0.847307	2.53488	1.75394	1.4539	6.40673	3.4136	6.20952	3.31186	1.89418	1.48744	4.87037	6.46718	7.4557	3.70659
2.61475	4.05769	0.782869	0.833724	2.26744	1.75422	1.7766	6.21777	3.31728	5.4619	3.32203	1.71429	1.60302	4.47531	6.54054	6.76582	3.73653
2.5	3.88462	0.792829	0.808899	2.48837	1.71087	1.99291	6.17374	3.23513	5.31429	3.24068	1.75661	1.55276	4.53086	6.35907	6.70886	3.72755
2.46721	3.88462	0.73506	0.819672	2.31395	1.72044	1.98227	6.01361	3.21955	5.52381	3.21695	1.8254	1.54774	4.52469	5.90734	6.44937	3.86826
2.28689	3.55769	0.750996	0.755504	2.76744	1.70017	2.19149	6.06005	3.20113	5.77143	3.26102	1.65608	1.45226	4.48148	5.7722	6.05063	3.81437
2.33607	3.90385	0.750996	0.801405	2.22093	1.71988	2.20213	6.16813	3.06374	5.35238	3.07458	1.71429	1.48744	4.39506	5.40154	5.63291	3.7994
2.27049	3.63462	0.699203	0.78267	2.43023	1.68384	2.04255	6.00641	3.04533	5.37143	3.02712	1.81481	1.45226	4.01852	5.28571	5.1519	3.50299
2.18852	3.65385	0.687251	0.7363	2.12791	1.69482	1.80496	5.94395	2.86686	5.22857	2.90508	1.51323	1.26131	4.47531	5.26641	4.67089	3.50898
2.07377	3.55769	0.687251	0.767213	2.15116	1.65034	1.63121	5.96157	2.67989	5.10476	2.70169	1.62434	1.28643	4.40741	5.139	4.56329	3.52695
2.05738	3.5	0.641434	0.74192	2.13953	1.62894	1.43617	5.93915	2.73371	4.90476	2.59661	1.50265	1.44221	4.01235	4.91506	4.06962	3.31437
1.95902	3.44231	0.60757	0.787354	1.76744	1.60473	1.37234	5.72458	2.65864	4.66667	2.47797	1.78307	1.17588	4.09259	4.83398	4.01266	3.28144
1.97541	3.26923	0.589641	0.754098	1.87209	1.6478	1.56383	5.70456	2.62606	4.49524	2.47797	1.4127	1.31658	4.37654	4.58687	4.02532	3.26347
1.86885	3.07692	0.61753	0.760187	1.89535	1.63035	1.72695	5.52602	2.38669	4.36667	2.3661	1.44444	1.15075	4.12963	4.6332	3.59494	3.20958
1.77049	2.98077	0.589641	0.71897	1.53488	1.57658	1.71631	5.39231	2.33144	4.19048	2.27119	1.34921	1.39698	3.39506	4.60618	3.32278	3.00299
1.72951	2.90385	0.541833	0.774707	1.5814	1.57798	1.6773	5.36749	2.24221	4.04286	2.17627	1.31746	1.29146	3.84568	4.21622	3.44304	3.04192
1.71311	2.55769	0.561753	0.753162	1.56977	1.56166	1.53191	5.20416	2.26346	3.85714	2	1.18519	1.1407	3.69753	4.09266	3.18354	2.89521
1.67213	2.59615	0.527888	0.751288	1.56977	1.57404	1.65248	5.08247	2.26629	3.74286	1.98644	1.08466	1.21106	5.73457	3.91892	2.94304	2.86527
1.65574	2.53846	0.505976	0.719438	1.19767	1.49944	1.52837	4.95356	2.16714	3.69524	1.78305	1.01587	1.11558	11.0617	3.61776	2.97468	2.67665
1.57377	2.42308	0.505976	0.707728	0.976744	1.47241	1.45035	4.85749	2.18414	3.57619	1.7661	0.915344	1.0201	10.4877	3.52896	2.91772	2.62874
1.54918	2.36538	0.460159	0.682904	1.09302	1.42596	1.41844	4.71097	2.28895	3.39524	1.69153	0.904762	1.03518	10.2222	3.45946	2.82278	2.73353
1.45082	2.34615	0.456175	0.654801	1.10465	1.41329	1.33688	4.7542	2.10765	3.15714	1.61017	0.724868	0.9799	9.74074	3.15444	2.36076	2.75449
1.39344	2.09615	0.444223	0.637002	1.02326	1.38007	1.37943	4.59568	2.16006	3.01429	1.54915	0.761905	0.984925	9.38272	2.90734	2.48734	2.54192
1.37705	1.88462	0.418327	0.669321	0.802326	1.37979	1.24823	4.33707	2.07649	2.90476	1.52881	0.867725	0.9799	9.46296	2.85714	2.43671	2.46407
1.41803	1.82692	0.39243	0.637002	0.77907	1.32292	1.22695	4.28183	2.13881	2.75238	1.3322	0.68254	1.15075	9.12963	2.89189	2.39873	2.65569
1.2623	1.78846	0.370518	0.608431	0.802326	1.27534	1.28723	4.18815	1.93201	2.49524	1.29492	0.619048	1.14573	8.64198	2.61004	2.20253	2.62575
1.2459	1.63462	0.328685	0.583607	0.709302	1.20439	1.30496	4.15372	1.80312	2.4381	1.19661	0.449735	1.22111	8.39506	2.6332	1.99367	2.46108
1.18033	1.55769	0.318725	0.580328	0.627907	1.15287	1.13475	4.10969	1.86686	2.23333	1.14576	0.47619	1.21608	7.9321	2.66023	1.86709	2.5988
1.13115	1.69231	0.282869	0.555035	0.697674	1.13373	1.12057	3.96878	1.78329	2.15714	1.12203	0.306878	1.44221	8.16049	2.63707	1.71519	2.40719
1.28689	1.55769	0.284861	0.571897	0.709302	1.09516	1.16667	3.98879	1.86402	1.92857	1.03051	0.285714	1.41206	7.69753	2.33205	1.70253	2.29641
1.11475	1.48077	0.241036	0.570492	0.593023	1.06644	0.996454	3.98639	1.66714	1.84286	1.05424	0.269841	1.45226	7.16049	2.48263	1.58228	2.12275
1.17213	1.32692	0.237052	0.586417	0.523256	1.06334	0.989362	3.77342	1.55949	1.7	0.976271	0.269841	1.53266	6.51852	2.31274	1.66456	2.09581
1.02459	1.28846	0.211155	0.52459	0.511628	0.986486	1.12057	3.78143	1.6728	1.63333	0.938983	0.280423	1.37688	6.38272	2.28571	1.70886	2.08084
0.92623	1.30769	0.213147	0.520843	0.465116	0.967905	0.968085	3.71497	1.59915	1.45714	0.881356	0.306878	1.35176	6.04321	2.16602	1.65823	2.00898
1.0082	1	0.199203	0.543794	0.790698	0.927083	1.11702	3.67494	1.58074	1.31905	0.779661	0.238095	1.54774	5.74074	2.14672	1.53797	1.98503
0.909836	0.980769	0.165339	0.498829	0.406977	0.874437	0.921986	3.6285	1.57507	1.27143	0.80678	0.26455	1.37186	5.46914	2.19305	1.64557	1.97904
0.868852	0.980769	0.151394	0.522717	0.639535	0.869651	0.787234	3.53002	1.43768	1.24286	0.725424	0.21164	1.23116	5.33951	2.02703	1.53165	1.83832
0.885246	0.884615	0.125498	0.508197	0.418605	0.882601	0.971631	3.48439	1.52125	1.08571	0.583051	0.111111	1.25126	5.25926	1.94208	1.64557	1.77844
0.909836	0.807692	0.11753	0.50445	0.616279	0.775619	0.953901	3.35629	1.51416	1.10952	0.538983	0.15873	1.18593	5.07407	2.08494	1.5443	1.7006
0.836066	0.884615	0.0936255	0.481499	0.313953	0.751689	0.840426	3.28423	1.40227	0.990476	0.488136	0.174603	1.39698	4.88889	2.10425	1.32278	1.68563
0.729508	0.846154	0.0796813	0.484778	0.44186	0.762106	0.946809	3.15132	1.43626	0.914286	0.457627	0.0634921	1.17588	4.90741	2.03475	1.42405	1.80838
0.819672	0.673077	0.0677291	0.533958	0.372093	0.701577	0.741135	3.19215	1.37535	0.895238	0.39661	0.232804	1.24623	4.64198	2.08108	1.51899	1.66168
0.795082	0.692308	0.0398406	0.493677	0.27907	0.682714	0.687943	3.07926	1.41076	0.82381	0.359322	0.116402	1.26633	4.75309	2.09653	1.52532	1.52695
0.762295	0.711538	0.0059761	0.506323	0.27907	0.668356	0.698582	3.14492	1.47309	0.771429	0.335593	0.0529101	1.22111	4.19136	2.00772	1.33544	1.50299
0.778689	0.5	-0.0119522	0.47822	0.418605	0.605856	0.620567	2.98639	1.50425	0.666667	0.288136	0.116402	1.19095	4.32099	1.94208	1.43038	1.50299
0.680328	0.576923	-0.0179283	0.454333	0.325581	0.614583	0.826241	2.80945	1.50425	0.619048	0.294915	-0.047619	1.1608	4.20988	1.88417	1.32911	1.38623
0.786885	0.557692	-0.0219124	0.474005	0.127907	0.583615	0.560284	2.81425	1.46317	0.628571	0.213559	0.142857	1.22613	4.14815	1.90734	1.15823	1.38323
0.680328	0.634615	-0.0258964	0.457143	0.209302	0.585304	0.652482	2.76221	1.35411	0.657143	0.186441	-0.00529101	1.0804	3.98148	1.71042	1.13291	1.3982
0.647541	0.557692	-0.0478088	0.45808	0.174419	0.556588	0.634752	2.66613	1.35269	0.619048	0.220339	-0.126984	1.05025	3.95679	1.74903	1.09494	1.36826
0.614754	0.5	-0.063745	0.47541	0.267442	0.543637	0.531915	2.66853	1.46742	0.519048	0.305085	0.0793651	0.984925	3.75309	1.6332	0.962025	1.31437
0.590164	0.5	-0.0697211	0.442155	0.232558	0.544482	0.560284	2.68295	1.47309	0.619048	0.281356	0.0793651	1.0804	3.61728	1.66795	1.11392	1.34132
0.557377	0.461538	-0.0517928	0.462295	0.255814	0.499718	0.439716	2.46837	1.48584	0.547619	0.227119	-0.0952381	0.984925	3.41975	1.40541	0.987342	1.29042
0.516393	0.538462	-0.0677291	0.424356	0.255814	0.484234	0.386525	2.46197	1.33144	0.538095	0.216949	0.021164	0.899498	3.24691	1.46718	1.08228	1.31737
0.459016	0.480769	-0.103586	0.448712	0.127907	0.450169	0.351064	2.43235	1.34136	0.442857	0.155932	-0.021164	0.854271	3.22222	1.40154	0.987342	1.36228
0.45082	0.480769	-0.10757	0.451522	0.104651	0.396678	0.546099	2.38591	1.35977	0.447619	0.328814	-0.0952381	0.924623	3.12963	1.27799	0.981013	1.21856
0.516393	0.519231	-0.0956175	0.4637	0.232558	0.403435	0.457447	2.40272	1.22663	0.504762	0.19322	-0.185185	0.969849	3.15432	1.139	0.943038	1.11976
0.42623	0.365385	-0.111554	0.467916	0.0581395	0.383164	0.478723	2.28263	1.20963	0.357143	0.142373	-0.126984	0.944724	3.00617	1.2278	0.898734	1.15868
0.385246	0.519231	-0.115538	0.463232	0.0348837	0.386261	0.446809	2.28823	1.05807	0.409524	0.155932	-0.0793651	0.919598	3.17901	1.26255	0.848101	1.14671
0.508197	0.384615	-0.0956175	0.500703	0.27907	0.344876	0.41844	2.33147	1.0864	0.380952	0.213559	-0.195767	0.693467	3.09259	1.27799	0.873418	1.11377
0.442623	0.403846	-0.0876494	0.466511	0.27907	0.351351	0.379433	2.22498	1.13173	0.290476	0.220339	-0.100529	0.778894	3.07407	1.1583	0.936709	1.02096
0.467213	0.326923	-0.0956175	0.476347	0.232558	0.346847	0.446809	2.15693	1.09348	0.352381	0.210169	-0.132275	0.899498	2.98765	1.10811	1	1.08982
0.54918	0.288462	-0.109562	0.425293	0.267442	0.340935	0.315603	2.09848	1.0864	0.32381	0.179661	-0.195767	0.658291	2.77778	1.10039	0.803797	0.979042
0.532787	0.403846	-0.13745	0.386885	0.127907	0.299268	0.287234	2.06966	1.06232	0.195238	0.142373	-0.179894	0.748744	2.83951	1.12741	0.753165	1.08683
0.54918	0.346154	-0.167331	0.444028	0.127907	0.309685	0.212766	2.04243	1.01558	0.17619	0.145763	-0.0952381	0.623116	2.91975	1.20077	0.753165	1.04491
0.532787	0.288462	-0.12749	0.432787	0.0232558	0.290541	0.336879	2	0.985836	0.157143	0.172881	-0.047619	0.638191	2.62346	1.16216	1.06962	1.08982
0.483607	0.346154	-0.141434	0.443091	0.174419	0.286036	0.329787	1.93915	0.902266	0.152381	0.142373	-0.201058	0.688442	2.5679	1.02703	0.993671	1.1018
0.442623	0.307692	-0.163347	0.423888	-0.116279	0.300676	0.358156	1.8791	0.936261	0.1	0.155932	-0.174603	0.748744	2.54938	1.06178	0.962025	1.13772
0.393443	0.423077	-0.131474	0.389696	0.104651	0.278153	0.400709	1.94636	0.971671	0.0571429	0.128814	-0.0793651	0.658291	2.66667	1.03475	0.924051	1.2006
0.418033	0.230769	-0.159363	0.433255	0.116279	0.281532	0.365248	1.8711	0.991501	0.109524	0.0711864	-0.116402	0.819095	2.61728	0.969112	1.0443	1.1497
0.5	0.288462	-0.131474	0.386417	0.139535	0.228604	0.375887	1.80865	0.889518	0.0571429	0.108475	-0.164021	0.683417	2.75926	0.976834	0.949367	1.1976
0.45082	0.230769	-0.12749	0.410773	0.0116279	0.213401	0.315603	1.81585	0.974504	0.0714286	0.0813559	-0.142857	0.733668	2.34568	1.12355	0.898734	1.14072
0.352459	0.326923	-0.155378	0.367213	0.0348837	0.211149	0.29078	1.77662	0.994334	0.104762	0.0779661	-0.169312	0.61809	2.58642	1.04633	1.08228	1.09281
0.467213	0.365385	-0.151394	0.371429	-0.0813954	0.181869	0.411348	1.71417	0.964589	0.0333333	0.105085	-0.126984	0.547739	2.37037	0.903475	1.08228	1.03593
0.42623	0.403846	-0.131474	0.366745	-0.0116279	0.199887	0.365248	1.70376	0.990085	0.0571429	0.101695	-0.132275	0.763819	2.59259	0.969112	1.13291	1.16467
0.368852	0.365385	-0.139442	0.35644	-0.104651	0.174831	0.340426	1.66934	0.995751	0.0809524	0.0745763	-0.0740741	0.773869	2.35802	1.00772	1.08228	1.00599
0.352459	0.384615	-0.157371	0.33911	0.0581395	0.162444	0.368794	1.66053	0.941926	0.0571429	0.0745763	-0.0899471	0.723618	2.0679	1.02703	1.05696	1.06886
0.434426	0.25	-0.161355	0.347073	0.174419	0.153153	0.429078	1.65733	0.970255	0.0380952	0.0915254	-0.0846561	0.758794	2.20988	1.00386	1.20886	1.06287
0.401639	0.25	-0.149402	0.367213	0.104651	0.145552	0.404255	1.63251	0.893768	0.0047619	0.0372881	-0.047619	0.678392	2.35185	0.949807	1.05696	0.97006
0.344262	0.192308	-0.12749	0.325527	0.0465116	0.16357	0.432624	1.55725	0.899433	0.0666667	0.0440678	-0.137566	0.743719	2.06173	0.876448	0.962025	0.841317
0.360656	0.134615	-0.151394	0.380796	0.232558	0.161036	0.411348	1.57486	0.964589	-0.00952381	0.040678	-0.26455	0.839196	1.98148	0.818533	1.07595	0.889222
0.327869	0.192308	-0.14741	0.377518	0.0116279	0.130912	0.340426	1.57246	0.835694	-0.00952381	0.0644068	-0.227513	0.718593	2.33951	0.918919	1.03797	0.853293
0.278689	0.25	-0.14741	0.378923	0.116279	0.125282	0.421986	1.44035	0.866856	0.0666667	0.0169492	-0.391534	0.763819	2.03704	0.849421	1.05696	0.904192
0.418033	0.211538	-0.155378	0.371429	0.0813954	0.0855856	0.361702	1.44035	0.902266	0.0190476	0.115254	-0.275132	0.562814	1.9321	0.857143	0.898734	0.859281
0.213115	0.211538	-0.139442	0.380796	0.0232558	0.0968468	0.510638	1.41233	0.926346	-0.0809524	0.0440678	-0.26455	0.542714	1.9321	0.80695	1.1519	0.994012
0.278689	0.0192308	-0.173307	0.405152	0.0116279	0.131475	0.265957	1.41713	0.868272	-0.0666667	0.0474576	-0.269841	0.58794	2.03086	0.88417	0.93038	0.823353
0.270492	0.115385	-0.161355	0.384543	0.186047	0.0844595	0.312057	1.41713	0.839943	0.0238095	0.0576271	-0.301587	0.572864	1.9321	0.733591	0.911392	0.829341
0.172131	0.173077	-0.163347	0.388759	-0.0348837	0.0731982	0.27305	1.38591	0.944759	-0.0619048	-0.0169492	-0.328042	0.648241	1.98148	0.764479	0.759494	0.769461
0.270492	0.0961538	-0.183267	0.391101	0.0697674	0.0810811	0.258865	1.30985	0.913598	-0.0619048	0.108475	-0.380952	0.623116	1.7963	0.722008	0.917722	0.826347
0.213115	0.0769231	-0.179283	0.382201	0.151163	0.0664414	0.223404	1.29944	0.896601	-0.0904762	0.020339	-0.396825	0.452261	1.80864	0.625483	0.993671	0.745509
0.237705	0.0769231	-0.187251	0.422014	0.174419	0.075732	0.0602837	1.23539	0.910765	-0.0714286	-0.00677966	-0.306878	0.41206	1.74691	0.687259	0.886076	0.814371
0.360656	0.211538	-0.201195	0.422951	0.0232558	0.0554617	-0.117021	1.28503	0.835694	-0.047619	-0.0440678	-0.227513	0.396985	1.83333	0.610039	1.02532	0.688623
0.311475	0.192308	-0.179283	0.405152	0.0813954	0.0458896	-0.177305	1.253	0.800283	-0.109524	0.0440678	-0.216931	0.457286	1.77778	0.648649	0.981013	0.778443
0.196721	0.25	-0.199203	0.377049	0.0116279	0.0594032	-0.237589	1.23859	0.839943	-0.147619	-0.020339	-0.26455	0.427136	1.81481	0.633205	0.962025	0.820359
0.221311	0.211538	-0.195219	0.361124	0.0348837	0.0357545	-0.248227	1.2466	0.854108	-0.104762	0.0677966	-0.248677	0.577889	1.75926	0.621622	1.03797	0.733533
0.237705	0.326923	-0.195219	0.332084	-0.0232558	0.0126689	-0.255319	1.20416	0.851275	-0.152381	-0.040678	-0.328042	0.542714	1.68519	0.486486	0.753165	0.760479
0.229508	0.269231	-0.197211	0.322248	-0.127907	0.0115428	-0.265957	1.13131	0.740793	-0.128571	-0.0474576	-0.333333	0.497487	1.68519	0.610039	0.93038	0.724551
0.188525	0.115385	-0.189243	0.325995	0.0116279	0.0208333	-0.251773	1.16974	0.796034	-0.138095	-0.0305085	-0.306878	0.537688	1.54321	0.505791	0.860759	0.676647
0.188525	0.153846	-0.209163	0.30445	0.0232558	0.00844595	-0.283688	1.07606	0.747875	-0.104762	-0.040678	-0.285714	0.522613	1.72222	0.621622	0.78481	0.721557
0.131148	0.173077	-0.203187	0.286651	-0.0232558	0.026464	-0.244681	1.07846	0.73796	-0.214286	-0.061017	-0.269841	0.60804	1.66049	0.640927	0.753165	0.826347
0.172131	0.115385	-0.219124	0.262295	0.127907	0.0188626	-0.301418	1.05685	0.701133	-0.22381	-0.0372881	-0.248677	0.487437	1.79012	0.559846	0.651899	0.673653
0.229508	0.230769	-0.167331	0.300234	0.0232558	-0.00140766	-0.304965	1.08647	0.78187	-0.252381	-0.0847458	-0.338624	0.603015	1.64198	0.555985	0.708861	0.724551
0.196721	0.211538	-0.195219	0.287119	0.0348837	-0.0143581	-0.223404	1.05284	0.834278	-0.228571	-0.142373	-0.280423	0.482412	1.54321	0.579151	0.765823	0.700599
0.155738	-0.0192308	-0.169323	0.315691	-0.0116279	-0.0115428	-0.265957	1.07766	0.750708	-0.22381	-0.0271186	-0.169312	0.507538	1.45062	0.598456	0.759494	0.664671
0.122951	0.0769231	-0.189243	0.273068	0.0348837	-0.0135135	-0.255319	1.02322	0.787535	-0.17619	-0.0338983	-0.343915	0.487437	1.61728	0.548263	0.506329	0.676647
0.139344	-0.0192308	-0.211155	0.26089	-0.0116279	-0.0304054	-0.219858	0.991994	0.796034	-0.242857	-0.0135593	-0.333333	0.376884	1.51852	0.687259	0.531646	0.583832
0.0491803	0.115385	-0.203187	0.312412	-0.104651	-0.0461712	-0.173759	0.974379	0.815864	-0.266667	-0.0779661	-0.174603	0.39196	1.57407	0.528958	0.5	0.667665
0.0655738	0	-0.209163	0.271194	0.302326	-0.0399775	-0.20922	1.0048	0.788952	-0.22381	-0.061017	-0.301587	0.507538	1.47531	0.617761	0.575949	0.55988
0.0737705	0.0769231	-0.197211	0.288525	-0.0348837	-0.0467342	-0.148936	1.08006	0.764873	-0.219048	-0.0169492	-0.26455	0.427136	1.7037	0.644788	0.417722	0.494012
0.122951	0.0961538	-0.223108	0.277752	0.139535	-0.0332207	-0.198582	1.01601	0.661473	-0.2	-0.0881356	-0.26455	0.452261	1.53704	0.710425	0.367089	0.502994
0.122951	0.0769231	-0.195219	0.2726	0.0697674	-0.0182995	-0.141844	1.02642	0.732295	-0.252381	-0.0271186	-0.31746	0.38191	1.59259	0.594595	0.64557	0.464072
0.106557	0.153846	-0.215139	0.251991	-0.0232558	-0.0523649	-0.0780142	1.02402	0.61898	-0.204762	-0.0372881	-0.227513	0.502513	1.53704	0.471042	0.639241	0.422156
0.122951	0.0192308	-0.215139	0.246838	-0.0116279	-0.0878378	-0.0957447	0.986389	0.716714	-0.190476	-0.0101695	-0.275132	0.356784	1.61111	0.46332	0.487342	0.461078
0.0819672	0.0192308	-0.203187	0.190164	0	-0.0929054	-0.106383	0.956765	0.75779	-0.252381	-0.0847458	-0.328042	0.316583	1.69136	0.471042	0.474684	0.479042
0.139344	-0.0576923	-0.2251	0.201874	-0.0581395	-0.0782658	-0.0106383	0.994395	0.621813	-0.219048	-0.108475	-0.148148	0.261307	1.46296	0.471042	0.335443	0.392216
0.131148	0.0576923	-0.231076	0.205152	-0.0348837	-0.0627815	0	0.995997	0.621813	-0.309524	-0.101695	-0.301587	0.477387	1.62346	0.471042	0.512658	0.284431
0.213115	0.134615	-0.205179	0.187354	0.0116279	-0.0658784	-0.0886525	1	0.63881	-0.261905	-0.0474576	-0.201058	0.452261	1.65432	0.559846	0.550633	0.314371
0.204918	0.173077	-0.215139	0.168618	-0.0930233	-0.0613739	0.0141844	0.951962	0.648725	-0.309524	-0.0440678	-0.190476	0.407035	1.39506	0.517375	0.329114	0.335329
0.180328	0.115385	-0.207171	0.176581	-0.0813954	-0.076295	0.0673759	0.945556	0.623229	-0.295238	-0.0542373	-0.174603	0.386935	1.59259	0.455598	0.601266	0.305389
0.213115	0.0384615	-0.169323	0.178923	-0.0465116	-0.0591216	0.0673759	0.974379	0.652974	-0.333333	-0.105085	-0.201058	0.356784	1.35185	0.532819	0.582278	0.299401
0.213115	0.192308	-0.2251	0.202342	-0.139535	-0.0594032	0.070922	0.876701	0.59915	-0.257143	-0.108475	-0.216931	0.562814	1.30247	0.459459	0.658228	0.233533
0.204918	0.0384615	-0.201195	0.160187	0	-0.0971284	0.0531915	0.891914	0.655807	-0.238095	-0.0440678	-0.216931	0.467337	1.35185	0.401544	0.651899	0.248503
0.229508	0.211538	-0.175299	0.140047	-0.162791	-0.112894	0.134752	0.851882	0.631728	-0.290476	-0.176271	-0.15873	0.447236	1.2037	0.540541	0.392405	0.185629
0.196721	0.0384615	-0.177291	0.115691	-0.0697674	-0.0954392	0.173759	0.883106	0.79745	-0.328571	-0.152542	-0.116402	0.442211	1.23457	0.405405	0.487342	0.224551
0.213115	0.173077	-0.163347	0.0964871	-0.162791	-0.112331	0.113475	0.827862	0.655807	-0.233333	-0.132203	-0.15873	0.432161	1.32099	0.389961	0.436709	0.278443
0.172131	0.269231	-0.187251	0.0786885	-0.0348837	-0.110923	0.173759	0.823859	0.600567	-0.242857	-0.0779661	-0.137566	0.447236	1.18519	0.34749	0.392405	0.260479
0.213115	0.230769	-0.195219	0.0983607	-0.162791	-0.127252	0.124113	0.832666	0.641643	-0.238095	-0.0847458	-0.137566	0.361809	1.14198	0.289575	0.386076	0.230539
0.303279	-0.115385	-0.191235	0.0679157	0.151163	-0.137669	0.131206	0.779023	0.613314	-0.280952	-0.138983	-0.243386	0.447236	1.37037	0.34749	0.455696	0.251497
0.270492	0.192308	-0.187251	0.0819672	-0.0232558	-0.157658	0.191489	0.755004	0.577904	-0.290476	-0.0745763	-0.26455	0.442211	1.2284	0.297297	0.398734	0.221557
0.204918	0.192308	-0.157371	0.0772834	0.0813954	-0.154842	0.0957447	0.780625	0.63881	-0.319048	-0.135593	-0.190476	0.542714	1.30864	0.274131	0.436709	0.266467
0.180328	0.192308	-0.197211	0.0824356	-0.0232558	-0.158502	0.120567	0.753403	0.521246	-0.304762	-0.138983	-0.238095	0.542714	1.07407	0.227799	0.512658	0.353293
0.163934	0.0769231	-0.177291	0.0721311	0	-0.135698	0.124113	0.751801	0.637394	-0.328571	-0.152542	-0.116402	0.447236	1.11111	0.266409	0.43038	0.305389
0.172131	0	-0.177291	0.12459	0.0348837	-0.142173	0.124113	0.736589	0.719547	-0.314286	-0.2	-0.169312	0.532663	0.975309	0.243243	0.537975	0.341317
0.196721	-0.0384615	-0.133466	0.0613583	-0.151163	-0.149775	0.120567	0.803042	0.664306	-0.285714	-0.0135593	-0.190476	0.502513	0.987654	0.258687	0.493671	0.302395
0.221311	0	-0.155378	0.102108	-0.104651	-0.181588	0.106383	0.723779	0.627479	-0.371429	-0.149153	-0.280423	0.507538	1.11111	0.220077	0.740506	0.365269
0.344262	0.0384615	-0.161355	0.0871194	-0.0465116	-0.175394	0.141844	0.776621	0.555241	-0.309524	-0.0644068	-0.126984	0.447236	1.08642	0.220077	0.607595	0.230539
0.245902	0.0384615	-0.133466	0.0941452	-0.0697674	-0.179617	0.0425532	0.778223	0.51983	-0.309524	-0.128814	-0.201058	0.437186	1.04938	0.250965	0.348101	0.287425
0.131148	-0.0384615	-0.139442	0.115691	-0.0348837	-0.177928	0.0106383	0.756605	0.552408	-0.233333	-0.19661	-0.15873	0.341709	1.19136	0.235521	0.487342	0.257485
0.139344	0.115385	-0.155378	0.088993	0.0465116	-0.185811	-0.0070922	0.718175	0.53966	-0.219048	-0.122034	-0.275132	0.351759	1.09877	0.328185	0.493671	0.293413
0.221311	0.0961538	-0.153386	0.130679	-0.139535	-0.169482	0.0602837	0.730985	0.565156	-0.309524	-0.0474576	-0.0846561	0.552764	0.944444	0.220077	0.436709	0.287425
0.286885	0	-0.189243	0.142389	-0.104651	-0.167511	0.0460993	0.733387	0.509915	-0.242857	-0.125424	-0.116402	0.557789	0.895062	0.227799	0.525316	0.263473
0.163934	-0.0192308	-0.143426	0.101639	-0.127907	-0.182714	0.120567	0.702962	0.531161	-0.180952	-0.135593	-0.100529	0.371859	0.95679	0.366795	0.664557	0.326347
0.213115	0.0576923	-0.155378	0.149883	-0.0930233	-0.193131	0.159574	0.658126	0.456091	-0.190476	-0.0542373	-0.031746	0.467337	1.0679	0.301158	0.531646	0.263473
0.213115	0.0961538	-0.125498	0.142389	-0.151163	-0.165259	0.0957447	0.678943	0.464589	-0.152381	-0.122034	-0.206349	0.351759	1.02469	0.262548	0.708861	0.314371
0.204918	0	-0.169323	0.160187	-0.139535	-0.163288	0.0283688	0.654123	0.512748	-0.17619	-0.169492	-0.0899471	0.482412	0.987654	0.227799	0.911392	0.134731
0.155738	0.0384615	-0.171315	0.140047	-0.0348837	-0.186092	0.035461	0.688551	0.46034	-0.0952381	-0.0644068	-0.121693	0.522613	0.962963	0.328185	1.07595	0.212575
0.196721	0.0192308	-0.149402	0.111944	-0.0348837	-0.173705	0.0460993	0.627702	0.468839	-0.0761905	-0.105085	-0.195767	0.341709	0.858025	0.223938	1.0443	0.0748503
0.188525	-0.0769231	-0.135458	0.117564	-0.0348837	-0.192005	-0.0035461	0.618095	0.463173	-0.0285714	-0.152542	-0.301587	0.351759	0.888889	0.285714	1.1962	0.161677
0.245902	0.0576923	-0.149402	0.116159	0.0348837	-0.18384	0.0248227	0.663731	0.402266	-0.157143	-0.0745763	-0.232804	0.437186	0.858025	0.247104	1.18354	0.188623
0.254098	0.192308	-0.167331	0.138173	0.0116279	-0.190034	0.106383	0.596477	0.378187	-0.0190476	-0.132203	-0.216931	0.291457	0.845679	0.351351	1.29747	0.191617
0.221311	0	-0.145418	0.145199	0.0232558	-0.188908	0.0283688	0.573259	0.410765	-0.17619	-0.210169	-0.047619	-0.120603	0.962963	0.316602	1.36709	0.197605
0.180328	0.0961538	-0.153386	0.118033	-0.0581395	-0.190597	0.12766	0.56285	0.409348	-0.190476	-0.162712	-0.227513	-0.467337	0.895062	0.328185	1.29114	0.266467
0.0901639	0.0384615	-0.149402	0.130211	0.0348837	-0.197072	0.0780142	0.59968	0.38102	-0.171429	-0.159322	-0.227513	-0.462312	0.796296	0.208494	1.31013	0.218563
0.221311	0.153846	-0.167331	0.0899297	-0.139535	-0.196227	0.173759	0.53803	0.406516	-0.0238095	-0.101695	-0.116402	-0.487437	0.919753	0.227799	1.17722	0.215569
0.254098	-0.0769231	-0.173307	0.0735363	-0.151163	-0.213119	0.340426	0.513211	0.365439	0.133333	-0.142373	-0.285714	-0.462312	0.864198	0.301158	1.16456	0.200599
0.122951	0.0769231	-0.201195	0.0360656	-0.151163	-0.193412	0.432624	0.556445	0.342776	0.0238095	-0.125424	-0.21164	-0.462312	0.777778	0.123552	1.22152	0.179641
0.172131	0.0384615	-0.189243	0.0412178	0	-0.171171	0.549645	0.517214	0.348442	0.0761905	-0.240678	-0.322751	-0.467337	0.777778	0.108108	1.12025	0.284431
0.204918	0.0192308	-0.173307	0.0412178	-0.0813954	-0.17089	0.741135	0.477982	0.291785	0.0571429	-0.0983051	-0.169312	-0.366834	0.962963	0.142857	0.949367	0.317365
0.106557	-0.0192308	-0.209163	0.0117096	0.0697674	-0.186092	0.87234	0.519616	0.471671	0.0428571	-0.176271	-0.227513	-0.356784	0.814815	0.0772201	1.01266	0.149701
0.188525	0	-0.191235	0.00421546	-0.0581395	-0.178773	1	0.552442	0.339943	0.114286	-0.176271	-0.201058	-0.276382	0.691358	0.181467	0.841772	0.143713
0.131148	0.0192308	-0.193227	0	0	-0.20214	1.03901	0.514812	0.366856	0.142857	-0.186441	-0.164021	-0.120603	0.740741	0.138996	0.924051	0.251497
0.221311	-0.0384615	-0.205179	0.018267	0.0348837	-0.213119	1.02128	0.523619	0.422096	0.0809524	-0.2	-0.280423	0.125628	0.845679	0.127413	0.892405	0.242515
0.114754	-0.0769231	-0.167331	-0.00936768	0.0697674	-0.21509	1.03191	0.507606	0.413598	0.0714286	-0.145763	-0.322751	0.135678	0.734568	0.15444	0.71519	0.161677
0.213115	0.115385	-0.187251	-0.0163934	-0.174419	-0.223818	1.04255	0.466773	0.406516	0.0190476	-0.2	-0.206349	0.246231	0.771605	0.138996	0.613924	0.332335
0.106557	0.0961538	-0.177291	-0.0290398	0.139535	-0.226351	1.19149	0.473979	0.331445	0.0380952	-0.118644	-0.142857	0.0753769	0.666667	0.131274	0.708861	0.275449
0.180328	0	-0.167331	0.00187354	-0.0348837	-0.2317	1.11702	0.440352	0.371105	0.114286	-0.135593	-0.322751	0	0.740741	0.023166	0.689873	0.245509
0.122951	0	-0.171315	-0.0145199	0.104651	-0.2317	1.23404	0.447558	0.439093	0.0904762	-0.149153	-0.185185	-0.0703518	0.728395	0.0656371	0.753165	0.251497
0.122951	-0.0384615	-0.181275	-0.0168618	-0.0697674	-0.247185	1.20213	0.405925	0.291785	0.047619	-0.20339	-0.179894	-0.0603015	0.641975	0.0849421	0.702532	0.239521
0.0491803	-0.0384615	-0.165339	0.000936768	-0.139535	-0.253378	1.1773	0.457166	0.356941	0.0333333	-0.101695	-0.291005	-0.0703518	0.666667	0.0888031	0.575949	0.173653
0.106557	-0.0576923	-0.153386	-0.0107728	0.162791	-0.275901	1.1383	0.428343	0.372521	0.00952381	-0.20678	-0.253968	-0.180905	0.709877	0.111969	0.702532	0.242515
0.221311	0.0961538	-0.167331	0.00983607	-0.0930233	-0.269426	1.19858	0.385909	0.348442	0.0047619	-0.169492	-0.253968	-0.0603015	0.802469	0.173745	0.689873	0.278443
0.163934	0	-0.163347	-0.018267	0.0465116	-0.271396	1.15957	0.403523	0.26204	-0.0238095	-0.132203	-0.148148	-0.080402	0.67284	0.023166	0.531646	0.185629
0.295082	0.0192308	-0.141434	-0.0252927	-0.0465116	-0.282376	1.15248	0.388311	0.271955	-0.052381	-0.186441	-0.269841	-0.0653266	0.753086	-0.019305	0.677215	0.188623
0.196721	0	-0.171315	-0.00843091	-0.0697674	-0.263795	1.19504	0.368295	0.273371	-0.0809524	-0.210169	-0.201058	-0.100503	0.592593	0	0.708861	0.197605
0.221311	0.0576923	-0.187251	-0.00655738	-0.0348837	-0.271678	1.10284	0.385909	0.34136	-0.17619	-0.125424	-0.132275	0.0603015	0.648148	-0.030888	0.544304	0.275449
0.237705	-0.0384615	-0.185259	-0.00843091	0.127907	-0.268018	1.25177	0.378703	0.29745	-0.266667	-0.149153	-0.222222	0.155779	0.604938	0.019305	0.518987	0.128743
0.286885	0.0576923	-0.177291	-0.0126464	0.0232558	-0.264077	1.25177	0.370697	0.279037	-0.180952	-0.210169	-0.259259	0.261307	0.666667	0.0656371	0.563291	0.296407
0.286885	0.173077	-0.175299	-0.0145199	-0.0465116	-0.24634	1.1773	0.408327	0.339943	-0.204762	-0.101695	-0.248677	0.226131	0.623457	-0.034749	0.544304	0.317365
0.278689	0.0576923	-0.181275	-0.00655738	-0.127907	-0.247748	1.15248	0.390713	0.293201	-0.247619	-0.135593	-0.232804	0.281407	0.617284	0.0810811	0.5	0.242515
0.278689	0.0961538	-0.163347	-0.024356	0	-0.225225	1.00709	0.3755	0.29745	-0.247619	-0.166102	-0.195767	0.201005	0.623457	0.00772201	0.506329	0.272455
0.245902	0.0576923	-0.151394	-0.0206089	0.0581395	-0.218187	1.0922	0.333867	0.310198	-0.233333	-0.176271	-0.142857	0.21608	0.703704	0.023166	0.43038	0.332335
0.204918	0.115385	-0.165339	-0.0421546	-0.0581395	-0.240991	1.03901	0.354684	0.270538	-0.257143	-0.108475	-0.121693	0.155779	0.524691	-0.003861	0.468354	0.338323
0.229508	0.115385	-0.145418	-0.0177986	0	-0.209741	1.16312	0.311449	0.34136	-0.261905	-0.183051	-0.169312	0.145729	0.62963	0.0733591	0.424051	0.317365
0.270492	0.134615	-0.139442	-0.0299766	0.127907	-0.208615	1.02837	0.358687	0.304533	-0.295238	-0.233898	-0.216931	0.221106	0.753086	0	0.525316	0.368263
0.213115	0.0576923	-0.143426	-0.0309133	0	-0.219876	0.950355	0.324259	0.29745	-0.214286	-0.135593	-0.285714	0.221106	0.697531	0.050193	0.405063	0.320359
0.213115	-0.0576923	-0.145418	-0.0327869	-0.0697674	-0.221284	1.12411	0.310649	0.252125	-0.2	-0.162712	-0.137566	0.271357	0.666667	0	0.341772	0.359281
0.180328	-0.0192308	-0.14741	-0.0234192	0.0116279	-0.228041	1.08511	0.344275	0.225212	-0.166667	-0.19661	-0.179894	0.211055	0.580247	0.027027	0.43038	0.278443
0.213115	0	-0.149402	0.0028103	0.0232558	-0.25732	1.00709	0.381906	0.273371	-0.166667	-0.213559	-0.253968	0.266332	0.660494	0.011583	0.487342	0.413174
0.172131	0.115385	-0.159363	0.0088993	-0.0930233	-0.258446	1.07092	0.301041	0.288952	-0.171429	-0.20678	-0.137566	0.115578	0.58642	-0.03861	0.537975	0.398204
0.204918	0.0384615	-0.153386	0.0238876	0	-0.236205	1.24113	0.321857	0.270538	-0.171429	-0.152542	-0.169312	0.120603	0.654321	-0.03861	0.550633	0.359281
0.163934	0.0961538	-0.131474	0.00749415	-0.139535	-0.255349	1.19504	0.346677	0.215297	-0.195238	-0.183051	-0.0634921	0.21608	0.709877	-0.019305	0.367089	0.341317
0.147541	0.0961538	-0.153386	0.0285714	-0.0465116	-0.238176	1.47518	0.304243	0.310198	-0.161905	-0.162712	-0.201058	0.110553	0.746914	-0.03861	0.417722	0.446108
0.106557	0.0961538	-0.165339	0.0398126	0.0697674	-0.276182	1.3156	0.256205	0.273371	-0.171429	-0.176271	-0.227513	0.155779	0.709877	0.03861	0.43038	0.39521
0.188525	0.134615	-0.149402	0.0796253	-0.0581395	-0.252815	1.30142	0.348279	0.236544	-0.185714	-0.159322	-0.195767	0.190955	0.765432	-0.019305	0.43038	0.44012
0.122951	0.173077	-0.145418	0.0805621	0.0116279	-0.26464	1.50355	0.289832	0.194051	-0.228571	-0.155932	-0.222222	0.130653	0.549383	0.11583	0.449367	0.416168
0.131148	0.134615	-0.167331	0.0880562	0.0232558	-0.273086	1.3617	0.31225	0.1983	-0.180952	-0.159322	-0.111111	0.105528	0.691358	0.019305	0.28481	0.317365
0.163934	0.0769231	-0.161355	0.12178	-0.0348837	-0.27393	1.34397	0.310649	0.215297	-0.266667	-0.213559	-0.269841	0.165829	0.728395	0.003861	0.35443	0.377246
0.155738	0.115385	-0.159363	0.0941452	-0.151163	-0.290259	1.20922	0.317854	0.155807	-0.219048	-0.244068	-0.185185	0.125628	0.518519	-0.042471	0.56962	0.326347
0.106557	0.288462	-0.167331	0.0613583	-0.186047	-0.288851	1.20567	0.316253	0.0793201	-0.257143	-0.176271	-0.26455	0.145729	0.641975	-0.030888	0.386076	0.281437
0.147541	0.134615	-0.191235	0.0566745	0.0232558	-0.325732	1.21631	0.315452	0.185552	-0.252381	-0.267797	-0.169312	0.160804	0.666667	0.034749	0.424051	0.431138
0	0.192308	-0.173307	0.0117096	0.0465116	-0.309966	1.27305	0.282626	0.165722	-0.22381	-0.162712	-0.0952381	0.0603015	0.567901	0.0656371	0.341772	0.347305
0.131148	-0.0192308	-0.161355	0.00983607	-0.116279	-0.331644	1.42908	0.259408	0.16289	-0.238095	-0.20678	-0.10582	0.175879	0.62963	0.0733591	0.360759	0.365269
0.106557	0.173077	-0.179283	-0.00749415	-0.0232558	-0.348255	1.39362	0.254604	0.219547	-0.242857	-0.298305	-0.296296	0.0603015	0.506173	0.0617761	0.291139	0.299401
0.0901639	-0.0192308	-0.175299	0.0126464	-0.0232558	-0.364865	1.36879	0.258607	0.167139	-0.238095	-0.264407	-0.253968	0.105528	0.62963	0.0694981	0.411392	0.350299
0.0655738	-0.0961538	-0.191235	0.0262295	-0.0232558	-0.350788	1.46809	0.329864	0.208215	-0.257143	-0.291525	-0.190476	0.0854271	0.54321	0.150579	0.310127	0.305389
0.172131	-0.0192308	-0.167331	-0.0215457	-0.0930233	-0.362331	1.31915	0.269015	0.15864	-0.22381	-0.274576	-0.232804	0.155779	0.679012	0.0733591	0.443038	0.248503
0.147541	-0.0384615	-0.195219	-0.0103045	-0.0116279	-0.351633	1.23759	0.305044	0.192635	-0.128571	-0.264407	-0.216931	0.130653	0.54321	0.142857	0.348101	0.326347
0.0983607	-0.115385	-0.165339	-0.0131148	-0.0697674	-0.369932	1.48936	0.225781	0.135977	-0.214286	-0.284746	-0.153439	0	0.592593	0.0694981	0.335443	0.275449
0	0	-0.157371	-0.0234192	0.0116279	-0.357545	1.49291	0.295436	0.165722	-0.180952	-0.311864	-0.179894	0.120603	0.617284	0.0733591	0.35443	0.341317
0.147541	-0.134615	-0.173307	-0.0117096	-0.0697674	-0.333333	1.75532	0.385909	0.137394	-0.195238	-0.291525	-0.148148	0.0753769	0.567901	0.11583	0.335443	0.332335
0.147541	-0.0384615	-0.165339	-0.0238876	0.244186	-0.188345	2.12411	0.445156	0.165722	-0.161905	-0.298305	-0.227513	0.080402	0.561728	0.034749	0.297468	0.386228
0.131148	-0.0769231	-0.169323	-0.0196721	0.116279	-0.0681306	2.39362	0.592474	0.126062	-0.0714286	-0.254237	-0.179894	-0.0753769	0.598765	0.0694981	0.607595	0.38024
0.188525	-0.0769231	-0.13745	-0.0299766	0.22093	0.0399775	2.52128	0.722178	0.117564	-0.152381	-0.105085	0.111111	-0.0301508	0.722222	0.138996	0.639241	0.329341
0.163934	-0.0192308	-0.115538	0.000468384	0.197674	0.157658	2.60638	0.305044	0.104816	-0.12381	-0.040678	-0.037037	-0.0301508	0.802469	0.158301	0.759494	0.482036
0.213115	-0.0576923	-0.0697211	0.0220141	0.127907	0.227477	2.64539	1.1305	0.0609065	-0.0380952	0.644068	-0.137566	-0.0100503	1.16667	0.050193	0.93038	0.365269
0.0983607	-0.0576923	-0.0219124	0.0777518	0.27907	0.304336	2.70922	1.33787	0.0977337	0.0761905	0.877966	-0.026455	0.0100503	1.71605	0.204633	1.60759	0.628743
0.245902	0.0961538	-0.0677291	-0.358314	0.0813954	0.161036	2.53191	1.4988	0.0679887	0.0809524	1.05763	0.026455	0.0753769	2.04321	0.166023	1.94937	0.97006
0.188525	0.25	0.0577689	0.237939	0.511628	0.607264	3.1383	1.71417	0.677054	0.9	1.08136	-0.021164	0.261307	3.54321	0.131274	2.3481	1.12575
0.213115	0.5	0.0976096	0.422951	0.476744	0.756757	3.47518	1.8759	0.943343	1.27143	1.21356	0.021164	0.366834	5.34568	0.0849421	2.60759	1.54491
0.172131	0.788462	0.11753	0.550351	0.476744	0.920608	3.36525	2.05124	1.09773	1.6619	1.36271	0.375661	0.547739	6.51235	0.320463	2.56329	2.07485
0.155738	0.846154	0.14741	0.614052	0.686047	0.996059	3.62766	2.2442	1.23088	1.74762	1.4678	0.57672	0.38191	7.58025	0.50193	2.58861	2.74551
0.204918	0.923077	0.209163	0.677752	0.755814	1.08868	3.46454	2.45877	1.24221	1.95238	1.6678	0.62963	0.462312	8.11728	0.698842	2.31646	2.80539
0.237705	1.01923	0.243028	0.663232	0.709302	1.17089	3.54255	2.59327	1.32436	2.12857	1.60678	0.984127	0.527638	8.58642	0.822394	2.46203	2.96407
0.237705	1.03846	0.288845	0.642155	0.965116	1.18947	3.50709	2.69816	1.31445	2.13333	1.58644	0.941799	0.396985	8.90123	0.826255	2.34177	3.07784
0.139344	0.961538	0.316733	0.6726	0.860465	1.17624	3.45745	2.65893	1.23371	2.09524	1.64407	0.809524	0.41206	8.46296	0.907336	2.05063	3.07485
0.172131	0.903846	0.338645	0.668852	0.465116	1.21593	3.64184	2.66533	1.36969	2.20476	1.54237	0.968254	0.386935	8.71605	0.803089	2.05696	3.1018
0.245902	0.942308	0.340637	0.65808	0.697674	1.15878	3.21277	2.67574	1.14731	2.02381	1.52542	0.873016	0.427136	8.14198	0.818533	1.81013	3.05389
0.139344	0.769231	0.340637	0.616393	0.616279	1.15822	3.37234	2.58367	1.14448	1.96667	1.48814	0.724868	0.422111	8.24691	0.749035	1.81646	2.92515
0.139344	0.884615	0.378486	0.577986	0.697674	1.13936	3.1773	2.55965	1.11756	1.87143	1.50508	0.846561	0.497487	7.65432	0.718147	1.51899	2.91617
0.155738	0.961538	0.378486	0.58548	0.732558	1.07095	3.17376	2.47558	1.14448	1.85238	1.54915	0.878307	0.492462	7.70988	0.760618	1.43038	3.03293
0.237705	0.653846	0.404382	0.554098	0.837209	1.0701	2.97518	2.4972	1.03399	1.85714	1.35254	0.740741	0.542714	7.37037	0.733591	1.48101	2.91916
0.213115	0.788462	0.344622	0.543794	0.523256	1.01689	3.03191	2.42674	1.04674	1.85238	1.30169	0.809524	0.452261	7.09259	0.69112	1.26582	2.71257
0.204918	0.692308	0.36255	0.540515	0.55814	0.946227	2.80496	2.31866	0.987252	1.85714	1.18305	0.661376	0.356784	6.77161	0.633205	1.36076	2.58383
0.172131	0.769231	0.370518	0.516159	0.476744	0.888232	2.71986	2.17774	0.98017	1.77143	1.14237	0.835979	0.356784	6.76543	0.617761	1.02532	2.65569
0.180328	0.615385	0.37251	0.498361	0.651163	0.896396	2.62411	2.24179	0.997167	1.71429	0.99661	0.756614	0.256281	6.62963	0.528958	1.15823	2.50898
0.155738	0.615385	0.316733	0.551756	0.465116	0.840372	2.6383	2.05284	0.964589	1.69524	1.05424	0.539683	0.39196	6.25926	0.467181	1.05063	2.61078
0.204918	0.615385	0.298805	0.506792	0.395349	0.771959	2.49645	2.11849	0.815864	1.70476	0.901695	0.47619	0.236181	5.97531	0.610039	0.968354	2.38024
0.295082	0.653846	0.292829	0.475878	0.360465	0.737331	2.44326	2.04724	0.811615	1.55714	0.908475	0.534392	0.467337	5.7963	0.544402	0.816456	2.44311
0.180328	0.576923	0.270916	0.44918	0.44186	0.682151	2.46454	1.95837	0.771955	1.45714	0.745763	0.386243	0.386935	5.75926	0.467181	0.879747	2.16766
0.196721	0.461538	0.284861	0.465105	0.686047	0.64893	2.28014	1.8719	0.699717	1.42381	0.705085	0.37037	0.326633	5.76543	0.509652	0.835443	2.17964
0.147541	0.461538	0.24502	0.508197	0.383721	0.598536	2.15248	1.77662	0.756374	1.44286	0.59661	0.402116	0.281407	5.3642	0.444015	0.759494	2.23353
0.196721	0.442308	0.199203	0.462763	0.372093	0.603322	2.19504	1.77102	0.73796	1.26667	0.535593	0.492063	0.266332	5.35802	0.444015	0.696203	2.15269
0.131148	0.365385	0.199203	0.41171	0.290698	0.56982	2.01418	1.7454	0.695467	1.1619	0.501695	0.280423	0.301508	5.14198	0.428571	0.803797	2.09281
0.172131	0.442308	0.207171	0.464637	0.22093	0.5625	2.15957	1.65572	0.63881	1.11429	0.372881	0.216931	0.296482	4.77778	0.482625	0.93038	2.12575
0.147541	0.461538	0.167331	0.407963	0.465116	0.580236	1.95035	1.65492	0.684136	1.1381	0.552542	0.312169	0.386935	4.89506	0.444015	0.746835	1.98503
0.188525	0.384615	0.155378	0.384543	0.197674	0.569257	1.95745	1.56125	0.650142	1.04286	0.410169	0.227513	0.331658	4.5679	0.525097	0.879747	2.03593
0.262295	0.461538	0.145418	0.371897	0.174419	0.533784	1.8617	1.53803	0.667139	1.04762	0.318644	0.126984	0.145729	4.49383	0.467181	0.848101	2.07784
0.204918	0.442308	0.151394	0.334426	0.290698	0.518581	1.82979	1.44115	0.688385	1.08571	0.291525	0.137566	0.175879	4.49383	0.590734	0.746835	1.87725
0.295082	0.403846	0.109562	0.275878	0.22093	0.500282	1.67021	1.45717	0.709632	1.06667	0.294915	0.21164	0.236181	4.44444	0.382239	0.556962	1.82934
0.262295	0.442308	0.0816733	0.266979	0.209302	0.44848	1.71631	1.35388	0.684136	1.24286	0.240678	0.195767	0.261307	4.25926	0.509652	0.563291	1.8503
0.286885	0.596154	0.0737052	0.293677	0.290698	0.445946	1.60993	1.38831	0.65864	1.18571	0.138983	0.26455	0.236181	4.14198	0.359073	0.727848	1.83832
0.196721	0.442308	0.0478088	0.268852	0.267442	0.418919	1.7234	1.33307	0.488669	1.0381	0.20678	0.243386	0.241206	4.15432	0.405405	0.443038	1.65868
0.278689	0.461538	0.0458167	0.251991	0.360465	0.399775	1.71631	1.36029	0.543909	1.1619	0.152542	0.169312	0.366834	4.11111	0.405405	0.620253	1.69162
0.254098	0.519231	0.0338645	0.248244	0.162791	0.38232	1.74468	1.27462	0.536827	1.05714	0.132203	0.142857	0.316583	3.78395	0.455598	0.56962	1.60778
0.237705	0.461538	0.0438247	0.23185	0.186047	0.372748	1.55674	1.2546	0.522663	1.04286	0.0813559	0.169312	0.271357	3.64198	0.351351	0.481013	1.5479
0.278689	0.576923	0.0278884	0.239344	0.104651	0.338119	1.37943	1.25941	0.572238	0.990476	0.0474576	0.15873	0.331658	3.75309	0.366795	0.588608	1.57784
0.270492	0.673077	-0.00796813	0.197658	0.244186	0.257601	1.57801	1.32266	0.545326	0.885714	0.0847458	0.0846561	0.170854	3.42593	0.494208	0.455696	1.47605
0.122951	0.615385	0.0059761	0.238407	0.139535	0.256757	1.53546	1.22578	0.552408	0.928571	0.0474576	0.015873	0.457286	3.33951	0.339768	0.468354	1.43114
0.336066	0.365385	-0.0199203	0.244496	0.0232558	0.311655	1.3227	1.26902	0.531161	0.957143	0.0372881	0.269841	0.266332	3.37037	0.436293	0.525316	1.4012
0.295082	0.365385	-0.0418327	0.192974	0.0116279	0.296171	1.51418	1.23699	0.584986	0.971429	0.0542373	0.116402	0.150754	3.15432	0.389961	0.360759	1.37126
0.237705	0.403846	-0.0478088	0.19719	0.116279	0.263514	1.22695	1.17134	0.514164	0.971429	0.0440678	0.0529101	0.130653	3.38889	0.320463	0.436709	1.38922
0.237705	0.423077	-0.0418327	0.202342	0.232558	0.26661	1.18794	1.10809	0.555241	0.838095	0.0983051	0.354497	0.135678	3.04321	0.243243	0.5	1.29341
0.188525	0.403846	-0.0677291	0.187354	0.0581395	0.236486	1.22695	1.09127	0.57932	0.914286	0.0915254	0.10582	0.226131	3.10494	0.355212	0.322785	1.31138
0.163934	0.423077	-0.063745	0.209836	0.0697674	0.206644	1.20567	1.08727	0.548159	1.00476	0.189831	0.126984	0.221106	3.06173	0.293436	0.379747	1.28443
0.204918	0.346154	-0.105578	0.176581	-0.0813954	0.195101	1.1773	1.09367	0.562323	1.0381	0.0474576	0.0634921	0.482412	2.74074	0.258687	0.436709	1.16766
0.180328	0.365385	-0.115538	0.170492	0.0697674	0.180462	1.0461	1.06645	0.640227	0.995238	0.0237288	0.0582011	0.18593	3.09877	0.355212	0.575949	1.25449
0.229508	0.461538	-0.101594	0.167213	0.0581395	0.116836	1.01064	1.01201	0.57932	0.92381	-0.00338983	0.031746	0.201005	2.80247	0.250965	0.348101	1.23952
0.237705	0.384615	-0.139442	0.143326	0.139535	0.107264	0.925532	0.968775	0.543909	0.92381	0.0474576	0.031746	0.21608	2.67901	0.208494	0.246835	1.13473
0.229508	0.25	-0.143426	0.138642	0.162791	0.133727	0.893617	0.981585	0.550991	0.842857	0.0847458	-0.0529101	0.21608	2.84568	0.135135	0.379747	1.11078
0.139344	0.288462	-0.14741	0.156909	0.0348837	0.113457	0.659574	0.971177	0.626062	0.752381	0.0508475	-0.026455	0.241206	2.77161	0.23166	0.424051	1.02395
0.188525	0.307692	-0.177291	0.140047	0.197674	0.0940315	0.609929	0.915132	0.603399	0.871429	0.149153	-0.0634921	0.296482	2.72222	0.420849	0.506329	1.11078
0.180328	0.25	-0.169323	0.127869	0.0697674	0.0664414	0.531915	0.865492	0.548159	0.809524	0.061017	-0.111111	0.155779	2.48148	0.247104	0.449367	1.07784
0.147541	0.346154	-0.161355	0.127869	0.0116279	0.0548986	0.535461	0.876701	0.453258	0.87619	0.0508475	-0.179894	0.160804	2.42593	0.185328	0.291139	1.03593
0.204918	0.307692	-0.163347	0.118501	0.0697674	0.0506757	0.329787	0.919936	0.542493	0.8	-0.0271186	-0.0846561	0.226131	2.52469	0.243243	0.240506	1.02695
0.163934	0.211538	-0.169323	0.166276	-0.0813954	0.0422297	0.329787	0.827862	0.502833	0.819048	-0.0169492	-0.111111	0.291457	2.38889	0.293436	0.348101	1.00599
0.196721	0.25	-0.161355	0.118033	0.0697674	0.022241	0.304965	0.819055	0.515581	0.833333	0.0508475	-0.0899471	0.241206	2.30864	0.204633	0.335443	1.02096
0.196721	0.211538	-0.167331	0.0843091	0.127907	-0.0177365	0.251773	0.751801	0.51983	0.771429	0.0644068	-0.216931	0.276382	2.35185	0.27027	0.253165	0.994012
0.196721	0.0961538	-0.155378	0.0669789	0.0581395	0.00591216	0.180851	0.770216	0.565156	0.67619	0.00338983	-0.148148	0.170854	2.55556	0.274131	0.329114	1.01497
0.172131	0.25	-0.129482	0.0969555	-0.104651	0.000563063	0.14539	0.764612	0.552408	0.614286	0.0644068	-0.164021	0.266332	2.39506	0.258687	0.487342	1.01198
0.147541	0.230769	-0.129482	0.133021	-0.139535	0.0109797	0.234043	0.722978	0.48017	0.861905	0.0237288	-0.206349	0.180905	2.39506	0.312741	0.28481	1.01198
0.0819672	0.115385	-0.153386	0.120375	-0.0930233	0.00422297	0.177305	0.692554	0.485836	0.709524	-0.0135593	-0.126984	0.311558	2.53086	0.196911	0.5	0.913174
0.147541	0.153846	-0.131474	0.0814988	-0.116279	-0.0045045	0.152482	0.69976	0.426346	0.819048	0.00338983	-0.190476	0.201005	2.18519	0.142857	0.386076	1.02395
0.0983607	0.230769	-0.123506	0.116159	-0.0697674	-0.0442005	0.170213	0.60048	0.532578	0.780952	0.0338983	-0.169312	0.211055	2.21605	0.138996	0.246835	0.886228
0.139344	0.269231	-0.115538	0.102108	-0.0465116	-0.0225225	0.216312	0.622898	0.454674	0.719048	-0.040678	-0.185185	0.241206	2.22222	0.285714	0.392405	0.958084
0.0819672	0.25	-0.139442	0.109133	-0.0232558	-0.0154842	0.0815603	0.586869	0.484419	0.67619	-0.0440678	-0.0899471	0.190955	2.08025	0.138996	0.28481	0.961078
0.131148	0.211538	-0.129482	0.076815	-0.104651	-0.044482	0.0638298	0.578062	0.415014	0.595238	0.0237288	-0.116402	0.211055	2.24691	0.169884	0.253165	1.03293
0.0901639	0.0769231	-0.133466	0.109133	0.0348837	-0.0295608	0.0780142	0.552442	0.478754	0.561905	-0.0237288	-0.10582	0.0854271	2.22839	0.138996	0.253165	0.967066
0.0655738	-0.0192308	-0.13745	0.123653	0.0697674	-0.0754505	0.0177305	0.534828	0.512748	0.728571	-0.0271186	-0.100529	0.241206	2.05556	0.138996	0.202532	0.874251
0.131148	0.115385	-0.133466	0.111944	0.0232558	-0.0729167	0.120567	0.503603	0.478754	0.661905	0.0135593	-0.126984	0.160804	2.32099	0.108108	0.322785	0.922156
0.131148	0.115385	-0.10757	0.136768	-0.0116279	-0.0717905	0.035461	0.503603	0.422096	0.595238	-0.0271186	-0.0952381	0.0904523	2.17284	0.169884	0.278481	0.919162
0.131148	0.0576923	-0.123506	0.1363	0.151163	-0.0788288	0.0460993	0.507606	0.471671	0.561905	-0.0372881	-0.15873	0.0904523	2.40123	0.138996	0.240506	0.850299
0.155738	0.153846	-0.125498	0.118033	-0.151163	-0.0819257	0.0141844	0.431545	0.454674	0.490476	-0.0915254	-0.248677	0.115578	2.07407	0.166023	0.183544	0.760479
0.147541	0.0192308	-0.139442	0.0983607	0.0697674	-0.0965653	0.0815603	0.457966	0.44051	0.37619	-0.0372881	-0.15873	0.0552764	2.05556	0.108108	0.392405	0.748503
0.106557	0.134615	-0.163347	0.159251	-0.0116279	-0.114302	0.106383	0.433947	0.426346	0.314286	0.0305085	0.042328	0.18593	1.93827	0.123552	0.221519	0.889222
0.114754	0.0384615	-0.14741	0.100234	-0.0116279	-0.1067	0.124113	0.417134	0.424929	0.361905	0.0372881	-0.0899471	0.120603	1.97531	0.119691	0.322785	0.862275
0.147541	0.0961538	-0.145418	0.10445	-0.0697674	-0.0943131	0.138298	0.389111	0.40085	0.342857	-0.0338983	-0.047619	0.165829	1.84568	0.0733591	0.367089	0.805389
0.196721	0.0576923	-0.161355	0.11897	-0.127907	-0.100788	0.035461	0.432346	0.330028	0.357143	0.0305085	-0.116402	-0.0100503	2.05556	0.108108	0.335443	0.769461
0.172131	0	-0.13745	0.113349	0.0813954	-0.0827703	0.0673759	0.391513	0.392351	0.271429	-0.0644068	-0.0899471	-0.0150754	1.88272	0.135135	0.348101	0.838323
0.221311	-0.0961538	-0.169323	0.106792	0.0813954	-0.103604	0.0921986	0.356285	0.386686	0.147619	-0.0542373	-0.10582	0.0452261	1.69136	0.119691	0.303797	0.823353
0.229508	0	-0.153386	0.0754098	-0.104651	-0.118243	0.0744681	0.366693	0.383853	0.128571	-0.0372881	-0.047619	0.0753769	1.75309	0.127413	0.348101	0.787425
0.270492	0.211538	-0.145418	0.052459	-0.0581395	-0.141892	0.0992908	0.32506	0.327195	0.0714286	-0.0338983	0.037037	-0.0301508	1.85185	0.166023	0.367089	0.736527
0.163934	0.0192308	-0.141434	0.070726	-0.127907	-0.135698	0.0815603	0.31305	0.344193	0.166667	-0.0983051	-0.0529101	0.080402	1.76543	0.0772201	0.329114	0.778443
0.196721	0.192308	-0.157371	0.109602	-0.0930233	-0.172297	0.0248227	0.311449	0.36119	0.147619	-0.00677966	0.026455	0.00502513	1.8642	0.0617761	0.272152	0.676647
0.221311	0.134615	-0.151394	0.0234192	-0.0116279	-0.153716	-0.0141844	0.31305	0.345609	0.1	0	0.00529101	-0.0753769	2.05556	0.111969	0.177215	0.778443
0.0737705	0.115385	-0.167331	0.0360656	-0.0348837	-0.17455	0.0673759	0.307446	0.369688	0.0666667	-0.0915254	-0.047619	-0.0150754	1.64815	0.146718	0.35443	0.742515
0.188525	-0.0961538	-0.159363	0.0538642	-0.0813954	-0.157939	0.109929	0.329063	0.348442	-0.052381	-0.0135593	0.0687831	0.00502513	1.7037	0.0579151	0.373418	0.763473
0.131148	0.230769	-0.155378	0.0332553	-0.174419	-0.163851	0.0177305	0.269816	0.327195	-0.0285714	-0.040678	0.0582011	0.0854271	1.61728	0.0656371	0.386076	0.874251
0.139344	0.153846	-0.161355	0.0295082	-0.197674	-0.169764	0.0141844	0.248999	0.347025	-0.133333	-0.105085	0.111111	0.080402	1.50617	0.11583	0.341772	0.790419
0.163934	0.0384615	-0.175299	0.0735363	-0.0813954	-0.164133	0.0141844	0.2506	0.347025	-0.119048	-0.108475	0.275132	0.080402	1.8642	0.030888	0.35443	0.655689
0.0983607	0.0961538	-0.163347	0.0271663	-0.0116279	-0.178209	-0.0851064	0.228183	0.354108	-0.0333333	-0.0474576	0.142857	0.0753769	1.68519	0.0656371	0.316456	0.805389
0.147541	0.0576923	-0.179283	0.0332553	-0.0232558	-0.176239	0.0212766	0.248199	0.314448	-0.133333	-0.0915254	0.174603	0.241206	1.66667	0.150579	0.386076	0.745509
0.0655738	0.0192308	-0.177291	-0.0112412	-0.0581395	-0.17286	-0.0460993	0.248999	0.296034	-0.0857143	-0.0881356	0.00529101	0.311558	1.54938	0.104247	0.341772	0.826347
0.188525	0.0192308	-0.173307	-0.0187354	-0.0348837	-0.185529	-0.0638298	0.240192	0.373938	-0.142857	-0.115254	0.0846561	0.286432	1.51235	0.0888031	0.43038	0.949102
0.172131	0.115385	-0.187251	-0.00936768	-0.151163	-0.175957	-0.0673759	0.198559	0.328612	-0.0809524	-0.101695	0.042328	0.366834	1.4321	0.100386	0.512658	0.640719
0.0901639	-0.0384615	-0.217131	-0.000468384	-0.0465116	-0.206644	-0.159574	0.238591	0.254957	-0.180952	-0.125424	0.031746	0.326633	1.35185	0.042471	0.449367	0.769461
0.131148	0	-0.179283	-0.0163934	-0.0813954	-0.205518	-0.152482	0.177742	0.220963	-0.0809524	-0.0949153	0.0529101	0.281407	1.49383	0.03861	0.582278	0.682635
0.172131	0.0384615	-0.181275	0.0112412	-0.116279	-0.23339	-0.134752	0.192154	0.216714	-0.147619	-0.122034	0.015873	0.296482	1.59259	0.0617761	0.449367	0.781437
0.0983607	0.0576923	-0.183267	-0.0449649	0.0581395	-0.262669	-0.12766	0.164932	0.228045	-0.161905	-0.0135593	-0.021164	0.226131	1.48148	0.050193	0.556962	0.694611
0.155738	-0.0192308	-0.197211	-0.0192037	0.0813954	-0.232264	-0.159574	0.14972	0.213881	-0.166667	-0.0576271	-0.0582011	0.170854	1.5	-0.00772201	0.506329	0.676647
0.0901639	-0.0769231	-0.197211	-0.0238876	-0.139535	-0.280124	-0.0780142	0.186549	0.175637	-0.0904762	-0.0237288	-0.116402	0.276382	1.40123	0.00772201	0.620253	0.640719
0.106557	0.0384615	-0.175299	-0.0285714	-0.0116279	-0.29223	-0.113475	0.188151	0.232295	-0.2	-0.101695	0.015873	0.271357	1.2963	0.011583	0.778481	0.700599
0.131148	0	-0.209163	-0.0571429	-0.0465116	-0.292793	-0.124113	0.200961	0.211048	-0.319048	-0.125424	-0.015873	0.261307	1.39506	-0.023166	0.962025	0.592814
0.139344	0.0769231	-0.207171	-0.064637	0.0465116	-0.303209	-0.0070922	0.204964	0.259207	-0.352381	-0.105085	-0.0582011	0.175879	1.50617	0.00772201	0.892405	0.652695
0.114754	0.0961538	-0.197211	-0.070726	0.0930233	-0.313345	-0.0780142	0.189752	0.253541	-0.347619	-0.0677966	-0.100529	0.236181	1.2963	-0.030888	1.17089	0.550898
0.155738	0.0576923	-0.191235	-0.0819672	-0.0813954	-0.331081	0	0.18735	0.186969	-0.32381	-0.115254	-0.015873	0.296482	1.3642	0.011583	1.08861	0.640719
0.0901639	0.173077	-0.177291	-0.0660422	0.0348837	-0.342624	0.070922	0.186549	0.280453	-0.247619	-0.0983051	-0.031746	0.170854	1.39506	0.027027	1.07595	0.679641
0.122951	0.0576923	-0.203187	-0.0697892	0	-0.338401	0.0390071	0.17454	0.283286	-0.27619	-0.0576271	-0.0793651	0.291457	1.32716	-0.030888	1.29114	0.685629
0.122951	0.0576923	-0.203187	-0.110539	0.0116279	-0.347128	-0.0319149	0.232186	0.246459	-0.247619	-0.0711864	-0.206349	0.20603	1.16049	-0.030888	1.15823	0.640719
0.0737705	-0.0576923	-0.201195	-0.116159	-0.0697674	-0.356137	-0.0106383	0.192154	0.226629	-0.319048	-0.145763	-0.153439	0.160804	1.45062	0.042471	1.10127	0.598802
0.0737705	0	-0.215139	-0.110539	0.0465116	-0.380349	0.0815603	0.205765	0.189802	-0.228571	-0.128814	-0.126984	0.165829	1.25926	-0.015444	1.06329	0.58982
0.0901639	0.0769231	-0.183267	-0.0800937	0.0116279	-0.377252	0.035461	0.23699	0.141643	-0.309524	-0.115254	-0.153439	0.19598	1.19136	-0.131274	1.09494	0.57485
0.0655738	0.0769231	-0.229084	-0.112881	0.255814	-0.383446	0.0283688	0.265813	0.127479	-0.3	-0.172881	-0.137566	0.175879	1.12346	0.003861	1.15823	0.580838
0.147541	0.0961538	-0.233068	-0.076815	-0.0232558	-0.373874	-0.0744681	0.315452	0.128895	-0.304762	-0.111864	-0.195767	0.150754	1.22222	-0.034749	1.03165	0.523952
0.0901639	0.0769231	-0.219124	-0.110539	0.104651	-0.376126	-0.117021	0.278623	0.161473	-0.328571	-0.135593	-0.169312	0.170854	1.25926	-0.100386	1.02532	0.52994
0.131148	0.115385	-0.223108	-0.0772834	-0.0116279	-0.381475	-0.14539	0.265813	0.168555	-0.357143	-0.101695	-0.174603	0.0703518	1.29012	-0.034749	0.822785	0.631737
0.106557	0.211538	-0.237052	-0.0922717	0.0348837	-0.374155	-0.159574	0.200961	0.127479	-0.4	-0.135593	-0.0899471	0.271357	1.12346	0.019305	0.987342	0.60479
0.221311	-0.0192308	-0.250996	-0.0716628	-0.0232558	-0.370777	-0.202128	0.185749	0.175637	-0.395238	-0.152542	-0.15873	0.180905	1.10494	-0.100386	0.936709	0.625749
0.147541	0.192308	-0.243028	-0.0730679	-0.0348837	-0.386824	-0.131206	0.203363	0.161473	-0.390476	-0.135593	-0.201058	0.201005	1.08025	0	0.981013	0.646707
0.172131	0.0961538	-0.284861	-0.0833724	-0.116279	-0.39527	-0.304965	0.145717	0.199717	-0.352381	-0.227119	-0.185185	0.231156	1.01852	-0.046332	0.917722	0.535928
0.213115	0.0961538	-0.250996	-0.0660422	-0.0232558	-0.378097	-0.276596	0.120096	0.167139	-0.366667	-0.155932	-0.0634921	0.0452261	1.08025	0.0694981	1.06329	0.547904
0.237705	0.0961538	-0.308765	-0.0936768	0.0581395	-0.392173	-0.244681	0.200961	0.17847	-0.371429	-0.189831	-0.100529	0.18593	1.03704	0.00772201	1	0.476048
0.311475	0.0384615	-0.276892	-0.116159	0.151163	-0.402027	-0.195035	0.148118	0.127479	-0.328571	-0.125424	-0.100529	0.19598	1.24691	-0.0849421	1.09494	0.583832
0.204918	0.0961538	-0.268924	-0.118033	0.139535	-0.401182	-0.237589	0.178543	0.140227	-0.361905	-0.145763	-0.15873	0.150754	1.16049	-0.0772201	1.12025	0.523952
0.262295	-0.0576923	-0.286853	-0.113817	-0.0813954	-0.413007	-0.280142	0.170536	0.0665722	-0.4	-0.122034	-0.137566	0.175879	1.20988	-0.03861	1.13924	0.505988
0.319672	0.0769231	-0.288845	-0.122717	0.197674	-0.396115	-0.304965	0.151321	0.107649	-0.366667	-0.118644	-0.142857	0.306533	1.28395	-0.034749	0.898734	0.520958
0.270492	0.230769	-0.268924	-0.130679	-0.0581395	-0.400619	-0.326241	0.17454	0.111898	-0.361905	-0.108475	-0.0740741	0.155779	1.12963	-0.015444	1.03165	0.452096
0.270492	0.0192308	-0.270916	-0.139578	0.0232558	-0.384291	-0.248227	0.126501	0.0963173	-0.328571	-0.118644	-0.21164	0.351759	1.06173	-0.050193	1	0.550898
0.270492	0.0576923	-0.262948	-0.148946	-0.0232558	-0.416667	-0.322695	0.15052	0.0906516	-0.328571	-0.155932	-0.201058	0.120603	1.00617	0.0540541	0.860759	0.398204
0.278689	0.173077	-0.2749	-0.114754	-0.0697674	-0.416667	-0.35461	0.168935	0.0566572	-0.242857	-0.108475	-0.201058	0.105528	1.00617	-0.030888	0.835443	0.508982
0.237705	0.134615	-0.250996	-0.108665	-0.0116279	-0.403998	-0.280142	0.126501	0.110482	-0.271429	-0.0915254	-0.148148	0.211055	1.05556	0.0810811	0.943038	0.461078
0.213115	0.0192308	-0.256972	-0.119906	-0.0930233	-0.400056	-0.280142	0.152122	0.0396601	-0.285714	-0.040678	-0.21164	0.155779	1.03086	-0.015444	0.962025	0.404192
0.221311	0.0384615	-0.23506	-0.098829	0.0813954	-0.411036	-0.276596	0.101681	0.134561	-0.261905	-0.159322	-0.206349	0.18593	1.16667	0.019305	0.753165	0.419162
0.295082	0.0769231	-0.24502	-0.113349	0.0697674	-0.402309	-0.301418	0.122498	0.103399	-0.3	-0.145763	-0.206349	0.120603	1.06173	-0.00772201	0.924051	0.407186
0.204918	0.0576923	-0.23506	-0.138173	0.0581395	-0.384854	-0.301418	0.140913	0.0127479	-0.319048	-0.0813559	-0.137566	0.170854	1.11111	-0.0617761	0.620253	0.488024
0.229508	0.269231	-0.23506	-0.13911	-0.127907	-0.3933	-0.358156	0.148919	0.0651558	-0.285714	-0.142373	-0.269841	0.0954774	1.06173	-0.03861	0.759494	0.311377
0.295082	0.153846	-0.227092	-0.15363	-0.127907	-0.377252	-0.379433	0.128102	0.140227	-0.280952	-0.0271186	-0.185185	0.120603	1.08642	-0.046332	0.639241	0.326347
0.262295	0.134615	-0.205179	-0.125059	0.0348837	-0.361205	-0.347518	0.116093	0.148725	-0.233333	-0.142373	-0.164021	0.0653266	1.01235	0.019305	0.626582	0.398204
0.147541	0.0576923	-0.197211	-0.148009	0.0348837	-0.33277	-0.368794	0.179343	0.150142	-0.261905	-0.162712	-0.259259	0.0904523	1.25309	0.015444	0.759494	0.356287
0.122951	0.192308	-0.211155	-0.140047	-0.0813954	-0.345158	-0.351064	0.0864692	0.161473	-0.147619	-0.152542	-0.227513	0.0201005	1.08025	0.0772201	0.512658	0.341317
0.237705	-0.0769231	-0.215139	-0.0594848	0	-0.345158	-0.386525	0.104083	0.256374	-0.195238	-0.132203	-0.253968	0.0452261	1.12346	0.142857	0.550633	0.257485
0.172131	0.0576923	-0.185259	-0.0571429	0.104651	-0.326295	-0.319149	0.0888711	0.232295	-0.12381	-0.145763	-0.328042	0.110553	0.987654	0.196911	0.544304	0.341317
0.163934	0.269231	-0.207171	-0.0651054	0.0465116	-0.317568	-0.347518	0.122498	0.296034	-0.161905	-0.145763	-0.259259	0.155779	1.1358	0.0810811	0.601266	0.326347
0.221311	0.0769231	-0.227092	-0.0515222	-0.0697674	-0.339809	-0.336879	0.114492	0.229462	-0.133333	-0.145763	-0.328042	0.120603	1.09259	0.123552	0.367089	0.194611
0.262295	-0.0192308	-0.193227	-0.0145199	-0.0465116	-0.332489	-0.379433	0.102482	0.320113	-0.195238	-0.152542	-0.296296	0.080402	1.16667	0.166023	0.493671	0.401198
0.262295	0.0961538	-0.179283	-0.0505855	0	-0.333615	-0.333333	0.172138	0.29745	-0.109524	-0.159322	-0.280423	0.140704	0.987654	0.235521	0.544304	0.287425
0.131148	0.0192308	-0.175299	-0.0131148	-0.0465116	-0.337838	-0.35461	0.148118	0.254957	-0.219048	-0.118644	-0.37037	0.0351759	1.04938	0.15444	0.5	0.344311
0.122951	0.115385	-0.191235	-0.0501171	-0.0930233	-0.354167	-0.294326	0.109688	0.305949	-0.152381	-0.105085	-0.396825	0.0653266	1.04938	0.123552	0.525316	0.272455
0.180328	0.0769231	-0.185259	-0.0782201	-0.0813954	-0.364583	-0.265957	0.117694	0.313031	-0.142857	-0.0237288	-0.253968	0.040201	1.12346	0.166023	0.417722	0.320359
0.147541	0.173077	-0.187251	-0.0796253	-0.0232558	-0.338401	-0.301418	0.0864692	0.351275	-0.1	-0.108475	-0.31746	0.155779	1.03086	0.158301	0.360759	0.266467
0.155738	0.211538	-0.183267	-0.0814988	-0.0930233	-0.351914	-0.212766	0.0992794	0.310198	-0.190476	-0.186441	-0.306878	0.0653266	0.981481	0.0965251	0.322785	0.278443
0.131148	0.346154	-0.187251	-0.0519906	-0.0116279	-0.371059	-0.27305	0.0688551	0.25779	-0.128571	-0.0644068	-0.365079	0.20603	1.04938	0.162162	0.417722	0.179641
0.245902	0.0961538	-0.165339	-0.0819672	0.0232558	-0.371903	-0.166667	0.071257	0.26204	-0.0857143	-0.0915254	-0.280423	0.150754	0.950617	0.019305	0.246835	0.248503
0.262295	0.153846	-0.177291	-0.0777518	-0.116279	-0.380631	-0.173759	0.113691	0.342776	0.0761905	-0.166102	-0.280423	0.135678	0.907407	0.0888031	0.386076	0.146707
0.131148	0.211538	-0.157371	-0.0683841	-0.139535	-0.376689	-0.184397	0.133707	0.332861	-0.0285714	-0.142373	-0.375661	0.226131	0.944444	0.023166	0.28481	0.164671
0.270492	0.230769	-0.159363	-0.105386	-0.151163	-0.404279	-0.0319149	0.131305	0.315864	-0.0190476	-0.135593	-0.312169	0.160804	1.17901	0.011583	0.35443	0.176647
0.229508	0.173077	-0.165339	-0.0941452	-0.0697674	-0.403435	-0.131206	0.139311	0.254957	-0.0238095	-0.0983051	-0.269841	0.160804	1.20988	0.050193	0.303797	0.137725
0.237705	0.153846	-0.175299	-0.0833724	0.0465116	-0.415822	-0.14539	0.11289	0.249292	0.0809524	-0.162712	-0.333333	0.135678	1.08025	0.0579151	0.443038	0.203593
0.336066	0.0769231	-0.177291	-0.0814988	-0.0348837	-0.411036	-0.0638298	0.1249	0.226629	0	-0.115254	-0.328042	0.120603	1.11111	0.104247	0.506329	0.176647
0.319672	0.0769231	-0.133466	-0.109602	0.0348837	-0.410191	-0.106383	0.0840673	0.28187	-0.0285714	-0.155932	-0.322751	0.0452261	0.932099	0.196911	0.487342	0.272455
0.245902	0.0192308	-0.139442	-0.103981	0.0581395	-0.400901	-0.0957447	0.0496397	0.192635	-0.0571429	-0.176271	-0.280423	0.0703518	1.11728	0.15444	0.360759	0.152695
0.327869	0.115385	-0.145418	-0.0861827	-0.151163	-0.394426	-0.124113	0.0664532	0.228045	-0.047619	-0.152542	-0.312169	0.0452261	0.950617	0.204633	0.537975	0.0658683
0.295082	0.153846	-0.119522	-0.111944	0.0581395	-0.399775	-0.0638298	0.0768615	0.243626	0.0952381	-0.118644	-0.333333	0.0854271	1.14815	0.0733591	0.379747	0.125749
0.319672	-0.0192308	-0.151394	-0.109602	-0.0116279	-0.419482	-0.0992908	0.0440352	0.160057	0.0238095	-0.271186	-0.232804	0.0703518	0.987654	0.11583	0.405063	0.0778443
0.221311	0.0576923	-0.14741	-0.112412	-0.151163	-0.412444	-0.14539	0.0352282	0.184136	0.161905	-0.186441	-0.312169	0.00502513	1.06173	0.027027	0.392405	0
0.295082	0.0192308	-0.165339	-0.109133	0.0116279	-0.423142	-0.117021	0.06245	0.235127	0.0761905	-0.210169	-0.359788	0.0653266	0.82716	-0.019305	0.436709	0.0359281
0.245902	0.153846	-0.175299	-0.134895	0.0232558	-0.420608	-0.120567	0.0584468	0.205382	0.0761905	-0.19661	-0.402116	0.0502513	0.901235	0.11583	0.278481	0.0538922
0.254098	0.192308	-0.201195	-0.132553	-0.0813954	-0.420608	-0.205674	0.040032	0.135977	0.119048	-0.145763	-0.349206	0.0100503	1.14815	0.0926641	0.310127	0.110778
0.188525	0.0576923	-0.187251	-0.0908665	0	-0.422579	-0.187943	0.0176141	0.157224	0.109524	-0.152542	-0.291005	0.0904523	1.01235	-0.0772201	0.21519	0.0928144
0.254098	-0.0192308	-0.161355	-0.0847775	0.0348837	-0.431869	-0.219858	0.0648519	0.160057	0.152381	-0.0949153	-0.338624	0.120603	1.17901	0.0965251	0.246835	0.0149701
0.221311	0.0769231	-0.181275	-0.0974239	0.116279	-0.413851	-0.219858	0.0808647	0.181303	0.00952381	-0.0983051	-0.238095	0.0150754	1.00617	0.123552	0.392405	0.0628743
0.204918	0.0384615	-0.219124	-0.0693208	0.0232558	-0.42089	-0.141844	0.0608487	0.150142	0.0285714	-0.19322	-0.328042	0.0552764	1.05556	0.158301	0.303797	0.0778443
0.131148	0	-0.167331	-0.0299766	-0.0813954	-0.413288	-0.156028	0.0488391	0.181303	0.1	-0.111864	-0.365079	0.0201005	1.1358	0.127413	0.348101	0.0568862
0.188525	0.0576923	-0.177291	-0.0159251	0.174419	-0.404561	-0.159574	0.0696557	0.239377	0.0666667	-0.169492	-0.232804	0.0854271	1.0679	-0.050193	0.544304	0.0778443
0.163934	0.0384615	-0.201195	0.00749415	-0.127907	-0.416667	-0.195035	0.10008	0.246459	0.0238095	-0.176271	-0.253968	0.0100503	1.1358	-0.019305	0.449367	-0.0149701
0.163934	0	-0.201195	-0.0145199	-0.0813954	-0.410191	-0.187943	-0.00960769	0.240793	0.0619048	-0.216949	-0.253968	0.0301508	1.15432	0.0656371	0.398734	0.0179641
0.254098	0.0384615	-0.207171	-0.0332553	-0.0813954	-0.418919	-0.0602837	0.00880705	0.167139	0.0619048	-0.142373	-0.195767	0.0753769	1.17284	0.108108	0.316456	0.0538922
0.163934	0.0576923	-0.205179	-0.0163934	-0.0348837	-0.456644	-0.173759	0.0304243	0.22238	0.052381	-0.166102	-0.238095	0.110553	1.11728	0.127413	0.303797	-0.0269461
0.106557	0.192308	-0.201195	-0.0393443	0.0348837	-0.445946	-0.131206	-0.0384307	0.186969	0.0857143	-0.155932	-0.343915	0.0753769	1.09877	0.162162	0.360759	0.0778443
0.155738	0.0769231	-0.191235	-0.00655738	-0.0581395	-0.440878	-0.177305	-0.0552442	0.179887	-0.0142857	-0.19322	-0.259259	0.0904523	1.01235	0.111969	0.379747	0.0568862
0.131148	0.173077	-0.193227	-0.0501171	-0.0697674	-0.434122	-0.148936	-0.0280224	0.211048	0.0809524	-0.240678	-0.328042	0	1.04321	0.042471	0.348101	0.00898204
0.0983607	0.0384615	-0.193227	-0.0444965	0.0813954	-0.437218	-0.12766	-0.0392314	0.137394	0.104762	-0.250847	-0.301587	0.0301508	1	0.027027	0.443038	0.0988024
0.114754	0.0769231	-0.175299	-0.0355972	-0.127907	-0.443975	-0.134752	-0.0592474	0.184136	-0.00952381	-0.20339	-0.31746	0.0301508	1.06173	0.108108	0.417722	0.0838323
0.106557	0.192308	-0.209163	-0.0337237	0.0232558	-0.459741	-0.205674	-0.0520416	0.109065	-0.0142857	-0.213559	-0.269841	-0.0201005	1.04938	0.015444	0.658228	0.167665
0.172131	0.230769	-0.193227	-0.0449649	-0.139535	-0.465935	-0.230496	-0.0488391	0.145892	-0.0142857	-0.213559	-0.153439	0.0201005	0.95679	0	0.5	-0.0449102
0.0819672	0.115385	-0.181275	-0.0323185	0.151163	-0.471565	-0.251773	-0.0568455	0.092068	0.0142857	-0.145763	-0.359788	-0.0100503	1.07407	0.00772201	0.56962	0.0988024
0.114754	-0.0192308	-0.181275	-0.0327869	-0.0930233	-0.457207	-0.244681	0.00720576	0.151558	-0.0619048	-0.172881	-0.243386	0.0251256	1.03704	0.0965251	0.518987	0.0568862
0.0737705	0.115385	-0.163347	-0.0426229	-0.0581395	-0.463964	-0.269504	0.00480384	0.171388	-0.047619	-0.0949153	-0.291005	0.0703518	1.00617	0.011583	0.405063	0.0479042
0.114754	0.0192308	-0.195219	-0.0590164	-0.0813954	-0.463119	-0.265957	-0.0128102	0.111898	-0.0714286	-0.0881356	-0.137566	0.0351759	1.09877	-0.019305	0.5	0.0479042
0.0409836	0.0961538	-0.203187	-0.0459016	0.0232558	-0.486205	-0.315603	-0.0240192	0.18272	-0.052381	-0.142373	-0.338624	0.0301508	0.888889	0.015444	0.455696	-0.011976
0.106557	-0.0384615	-0.187251	-0.0187354	0.186047	-0.495777	-0.198582	-0.0160128	0.0835694	0.0333333	-0.166102	-0.328042	-0.0150754	1.08025	-0.00772201	0.487342	-0.0149701
0.147541	0.0576923	-0.197211	-0.0557377	0.0813954	-0.517173	-0.159574	-0.0448359	0.124646	-0.0238095	-0.20339	-0.291005	-0.040201	0.987654	0.042471	0.506329	0.0449102
0.131148	0.0769231	-0.201195	-0.0496487	0.22093	-0.50732	-0.166667	-0.0544436	0.117564	-0.0285714	-0.210169	-0.206349	-0.0452261	0.901235	0.0810811	0.379747	0.0958084
0.155738	0.134615	-0.203187	-0.0196721	0.0232558	-0.514077	-0.184397	-0.0888711	0.0906516	0	-0.166102	-0.190476	0.0301508	0.907407	0.042471	0.518987	0.0269461
0.0655738	0.0384615	-0.217131	-0.024356	0.0348837	-0.527027	-0.212766	-0.328263	0.0708215	-0.0809524	-0.416949	-0.26455	-0.0452261	0.950617	0.023166	0.417722	0.0449102
0.139344	0.0769231	-0.213147	-0.0285714	-0.0116279	-0.530968	-0.237589	-0.238591	0.0991501	-0.0761905	-0.464407	-0.306878	-0.0753769	1.07407	0	0.278481	0.00598802
0.122951	0.0192308	-0.191235	-0.0234192	-0.0116279	-0.527872	-0.223404	-0.0904724	0.110482	-0.0285714	-0.376271	-0.296296	0.0753769	0.944444	0.0810811	0.462025	0.0419162
0.0655738	-0.211538	-0.290837	-0.401405	-0.127907	-0.513514	-0.212766	0.213771	0.127479	-0.166667	-0.366102	-0.301587	-0.19598	0.765432	0.0733591	0.588608	0.0868263
0.237705	-0.0384615	-0.209163	-0.108665	-0.116279	-0.482545	-0.390071	0.371497	-0.111898	0.195238	-0.338983	-0.174603	0.0301508	0.728395	0.023166	0.905063	0.152695
0.385246	0.0192308	-0.179283	0.0412178	0.116279	-0.279842	-0.276596	0.636509	-0.0807365	0.595238	-0.210169	-0.164021	0.20603	1.44444	0.015444	1.41139	0.434132
0.786885	0.25	-0.183267	0.302108	0.488372	-0.19848	-0.347518	0.85028	0.154391	1.15714	-0.145763	0.037037	0.331658	2.37037	0.177606	1.96203	1.03293
1.0082	0.461538	-0.103586	0.571429	0.94186	-0.0929054	-0.251773	1.02722	0.36119	1.54762	-0.0372881	0.190476	0.79397	3.91975	0.405405	2.41139	1.6018
1.44262	0.615385	-0.0956175	0.933021	1.11628	0.00309685	-0.202128	1.32986	0.609065	1.90952	0.0474576	0.481481	0.728643	5.16667	0.779923	2.96835	2.62874
1.80328	0.711538	-0.0737052	1.10585	0.988372	0.0816441	-0.0992908	1.36349	0.813031	2.19048	0.20678	0.634921	0.954774	6.28395	1.25097	3.31013	2.73054
2.19672	1.01923	-0.0318725	1.21405	1.23256	0.153716	-0.0106383	1.4996	0.922096	3.19524	0.247458	0.925926	0.974874	6.99383	1.62934	3.82911	3.37725
2.45082	1.23077	0.0378486	1.37002	1.68605	0.245214	-0.0177305	1.74139	1.00991	2.80952	0.315254	0.899471	1.01005	8.05556	2.10811	4.13924	3.9491
2.68033	1.40385	0.0756972	1.46792	1.67442	0.310529	0.12766	1.78623	1.04391	3.24286	0.437288	1.0582	1.09045	8.88889	2.57915	4.44304	4.23353
3.11475	1.67308	0.0697211	1.54567	1.63953	0.401182	0.244681	1.86469	1.1898	3.33333	0.491525	1.28571	1.26131	9.53086	2.99228	4.86076	4.63174
3.35246	1.67308	0.115538	1.4904	1.98837	0.463119	0.202128	1.98959	1.41785	3.8381	0.39661	1.30688	1.49749	10.3457	3.42471	5.3038	4.92216
3.59016	2.09615	0.187251	1.59813	1.90698	0.487894	0.276596	2.02322	1.63173	3.8619	0.569492	1.20635	1.61809	10.8148	3.84556	5.13291	4.98802
3.91803	2.15385	0.215139	1.53349	1.82558	0.541385	0.414894	2.06405	1.62465	4.04286	0.569492	1.43915	1.75879	11.1111	4.13127	5.43671	5.00599
4.17213	2.25	0.195219	1.53021	2.37209	0.569257	0.861702	2.19055	1.66147	4.08095	0.640678	1.37037	2.0603	11.3642	4.51351	5.8481	5.34132
4.36066	2.42308	0.262948	1.44871	2.34884	0.650338	0.925532	2.56926	1.8272	4.23333	0.583051	1.44974	1.92965	11.5679	4.67181	5.77215	5.42814
4.46721	2.48077	0.286853	1.39906	2.11628	0.686374	0.769504	2.41793	2.04674	4.4381	0.549153	1.28571	1.93467	11.4506	4.96525	5.74051	5.24551
4.47541	2.67308	0.330677	1.4534	2.33721	0.744932	0.744681	2.04163	1.96884	5.62857	0.444068	1.32275	1.94975	11.1235	5.08494	5.82278	5.11976
4.69672	2.86538	0.35259	1.41733	2.39535	0.81982	0.946809	3.5028	2.24363	5.02381	1.34915	1.22222	1.9598	11.4753	5.25869	4.10759	5.34731
4.63934	2.76923	0.354582	1.70913	2.5	0.849662	1.2234	3.89191	2.13598	4.97619	1.50508	1.21164	1.76382	11.2469	5.33205	6.8038	5.18263
4.56557	2.84615	-0.00199203	0.490867	2.06977	0.853322	1.56383	3.89832	2.3187	3.88095	1.41695	1.28571	1.8593	9.35185	5.57529	6.68354	5
4.70492	3.15385	0.446215	1.53208	1.86047	0.661036	1.94681	3.88151	2.46034	4.6	1.56949	1.24868	2.1809	12.9074	5.4749	6.29747	4.22455
4.63115	3.30769	0.400398	1.55129	1.77907	0.726633	2.14539	3.85749	2.88952	4.1619	1.47458	1.43386	2.25628	12.8519	4.37066	6.09494	4.55389
4.56557	3.21154	0.380478	1.48103	1.60465	0.699324	2.2695	3.90472	3.06374	3.92857	1.36271	1.59788	2.17588	12.7778	5.71042	5.82911	4.59281
4.67213	3.36538	0.338645	1.4815	1.77907	0.755349	2.10284	4.04003	3.11473	4.09048	1.33898	1.38095	2.08543	12.8025	5.6332	5.6519	4.3503
4.63115	3.25	0.380478	1.44169	1.81395	0.716216	2.21986	4.05204	3.18414	4.00476	1.27458	1.49206	2.09548	12.4383	5.3166	5.58861	4.40719
4.7541	3.01923	0.338645	1.32927	1.66279	0.678209	2.38652	4.13131	3.0864	3.93333	1.25763	1.43386	2.10553	12.3827	5.32819	5.28481	4.10479
4.59836	3.11538	0.306773	1.35597	1.56977	0.633164	2.17021	3.85028	3.18839	3.48095	1.15932	1.43386	2.201	12.1173	5.27027	4.62658	4.27545
4.34426	3.05769	0.288845	1.2815	1.39535	0.624437	2.28369	3.75661	3.23088	3.39524	1.06441	1.36508	2.08543	11.4074	5.19305	2.06329	3.9012
4.22951	3.11538	0.298805	1.27073	1.55814	0.653435	2.19149	3.69015	3.22946	3.1381	1.02712	1.2963	2.24623	11.6235	4.69498	0.177215	4.04491
4.13934	3.32692	0.294821	1.22201	1.31395	0.645552	2.08156	3.64051	2.94193	3.14762	1.10847	1.20106	1.94975	11.3272	4.62934	-0.189873	4.0509
3.94262	3.21154	0.276892	1.18173	1.53488	0.63232	1.33333	3.64692	2.85411	3.23333	0.962712	1.35979	1.81407	10.8025	4.62162	-0.367089	3.79341
3.77869	3.11538	0.219124	1.13677	1.25581	0.570101	0.712766	3.70296	2.91785	3.09048	1.00678	1.03175	1.68844	10.9506	4.25483	-0.424051	3.84431
3.66393	2.86538	0.231076	1.13068	1.26744	0.518863	0.510638	3.44355	2.89518	2.9619	0.972881	1.01058	1.70854	10.2531	4.01931	-0.443038	3.74551
3.54098	2.67308	0.195219	1.09977	1.36047	0.473255	0.390071	3.46677	2.89802	2.88571	0.888136	1.06349	1.58794	9.93827	4.14286	-0.367089	3.57186
3.43443	2.82692	0.201195	1.04684	1.09302	0.448198	0.333333	3.41874	2.62748	2.88095	0.867797	0.978836	1.61307	9.59259	3.88031	-0.462025	3.57186
3.33607	2.69231	0.2251	1.04918	0.918605	0.444257	0.244681	3.2442	2.59773	2.74286	0.840678	0.952381	1.48744	9.31481	3.73745	-0.449367	3.57485
3.13934	2.55769	0.149402	1.00422	0.976744	0.461149	0.230496	3.22738	2.63031	2.5	0.667797	0.835979	1.41709	9.2037	3.55212	-0.563291	3.29341
2.98361	2.36538	0.141434	1.01499	0.906977	0.423705	0.134752	3.11449	2.53824	2.54286	0.715254	0.724868	1.38191	8.47531	3.49807	-0.537975	3.04192
2.84426	2.28846	0.129482	0.954567	0.883721	0.388514	0.177305	2.92874	2.4915	2.52857	0.684746	0.666667	1.1809	8.23457	3.47876	-0.582278	3.11677
2.63115	2.09615	0.11753	1.01593	1.01163	0.358108	0.113475	2.94315	2.28754	2.31429	0.572881	0.677249	1.26633	7.94444	3.09266	-0.512658	2.82635
2.61475	2.03846	0.0856574	1.05246	0.906977	0.321791	0.180851	3.01281	2.22663	2.41905	0.494915	0.57672	1.29146	7.66667	3.16988	-0.582278	2.67365
2.43443	2.05769	0.0856574	1.08197	0.848837	0.301802	0.265957	2.93595	2.20397	2.30952	0.352542	0.529101	1.15075	7.67901	3.01158	-0.607595	2.82036
2.36885	1.92308	0.0756972	0.929742	0.72093	0.268581	0.177305	2.8687	2.02833	2.08095	0.454237	0.380952	1.15075	7.19136	3.05791	-0.601266	2.58982
2.2459	1.76923	0.0418327	0.913349	0.790698	0.238457	0.223404	2.77582	2.06799	2.00952	0.338983	0.296296	1.03015	6.97531	2.83784	-0.550633	2.38024
2.04918	1.78846	0.0239044	0.951756	0.872093	0.229448	0.138298	2.82706	1.8966	2.02381	0.338983	0.26455	1.1407	6.69753	2.65637	-0.56962	2.29641
2	1.57692	0.00796813	0.945199	0.872093	0.224662	0.234043	2.67974	2.09348	1.9	0.240678	0.338624	1.13065	6.41358	2.66023	-0.550633	2.44012
1.84426	1.46154	-0.00398406	0.941452	0.465116	0.204955	0.20922	2.55084	2.06941	1.90476	0.122034	0.195767	1.0804	6.10494	2.58687	-0.563291	2.21557
1.84426	1.46154	-0.00398406	0.915222	0.534884	0.182995	0.191489	2.52842	1.91785	1.77619	0.169492	0.111111	1.0603	5.69753	2.43629	-0.613924	2.18862
1.63934	1.42308	-0.0199203	0.888993	0.593023	0.158221	0.124113	2.52202	1.86544	1.75238	0.111864	0.195767	0.974874	5.76543	2.52896	-0.601266	2.02695
1.64754	1.15385	0.00996016	0.815457	0.616279	0.161036	0.177305	2.46037	1.82011	1.55238	0.152542	0.169312	0.914573	5.16667	2.37452	-0.64557	2.00898
1.59836	1.21154	0.00199203	0.788759	0.465116	0.137106	0.216312	2.43635	1.83428	1.42857	0.0915254	0.216931	0.959799	5.00617	2.16216	-0.556962	1.90419
1.5082	1.28846	0.00796813	0.779391	0.488372	0.160755	0.12766	2.28503	1.83144	1.44762	0.0440678	0.232804	0.904523	5.09259	2.16988	-0.537975	1.76048
1.5082	1.03846	-0.0159363	0.742389	0.406977	0.17652	0.0992908	2.28423	1.77904	1.33333	-0.0508475	0.0687831	0.929648	4.75309	2.21622	-0.550633	1.70958
1.44262	1.03846	-0.063745	0.787354	0.604651	0.179899	0.0319149	2.16413	1.81445	1.21905	0.0101695	0.026455	0.879397	4.69136	2.16602	-0.632911	1.55988
1.29508	1.03846	-0.0458167	0.740047	0.255814	0.160473	0.0070922	2.04404	1.76062	1.17619	-0.0237288	0.132275	0.879397	4.45062	1.94208	-0.537975	1.47006
1.31967	1.05769	-0.0418327	0.708665	0.418605	0.154561	-0.0141844	2.0024	1.63739	1.15714	-0.0542373	-0.047619	0.743719	4.47531	1.7722	-0.556962	1.49102
1.18852	0.923077	-0.0577689	0.703981	0.511628	0.160473	0.0035461	2.0048	1.6119	1.04762	-0.0508475	-0.00529101	0.80402	4.29012	1.83398	-0.601266	1.38024
1.28689	0.730769	-0.063745	0.67822	0.569767	0.1875	0.0638298	1.82866	1.69547	0.961905	-0.132203	-0.047619	0.713568	4.34568	1.89961	-0.563291	1.31737
1.18033	0.769231	-0.103586	0.694614	0.453488	0.195664	0.035461	1.75661	1.58499	0.914286	-0.125424	-0.0529101	0.658291	4.04938	1.74517	-0.626582	1.20958
1.18852	0.769231	-0.101594	0.630445	0.406977	0.160473	0.0531915	1.69736	1.58074	0.9	-0.155932	-0.010582	0.713568	3.87654	1.66795	-0.626582	1.23653
1.18852	0.538462	-0.121514	0.659016	0.360465	0.143018	0.0886525	1.60288	1.49717	0.819048	-0.149153	-0.0740741	0.829146	3.76543	1.76062	-0.64557	1.11677
1.01639	0.75	-0.101594	0.625761	0.418605	0.0498311	0.0780142	1.54444	1.56799	0.766667	-0.159322	-0.0952381	0.653266	3.97531	1.66409	-0.582278	1.00898
1.04098	0.826923	-0.111554	0.61171	0.383721	0.0518018	0.0567376	1.57246	1.43909	0.685714	-0.213559	-0.100529	0.688442	3.75926	1.61776	-0.512658	1.01198
0.97541	0.557692	-0.113546	0.638876	0.22093	0.0557432	0.0531915	1.53163	1.41501	0.719048	-0.176271	-0.047619	0.663317	3.4321	1.59459	-0.639241	0.919162
0.97541	0.557692	-0.129482	0.591101	0.360465	0.0422297	-0.0141844	1.45236	1.2932	0.661905	-0.186441	-0.164021	0.703518	3.45062	1.62162	-0.537975	0.997006
0.967213	0.442308	-0.12749	0.577518	0.430233	0.013795	0.0283688	1.46517	1.21955	0.704762	-0.267797	-0.153439	0.623116	3.37654	1.46718	-0.651899	0.994012
0.877049	0.634615	-0.111554	0.570492	0.360465	-0.0256194	0.0851064	1.53883	1.24788	0.614286	-0.284746	-0.0740741	0.623116	3.06173	1.51351	-0.632911	1.05389
0.852459	0.442308	-0.111554	0.534426	0.267442	-0.0627815	0.170213	1.51962	1.28329	0.561905	-0.284746	-0.142857	0.517588	3.03086	1.57143	-0.601266	0.859281
0.844262	0.576923	-0.131474	0.516159	0.337209	-0.089527	0.521277	1.52362	1.20255	0.409524	-0.19322	-0.222222	0.572864	3.03704	1.3861	-0.531646	0.913174
0.827869	0.346154	-0.129482	0.495082	0.27907	-0.105293	0.613475	1.57806	1.27195	0.561905	-0.311864	-0.0846561	0.572864	3.08642	1.35521	-0.582278	0.784431
0.762295	0.461538	-0.119522	0.503044	0.197674	-0.0945946	0.730496	1.65492	1.25496	0.4	-0.267797	-0.0846561	0.633166	2.99383	1.38224	-0.613924	0.703593
0.704918	0.5	-0.169323	0.45808	0.313953	-0.0898086	0.617021	1.64051	1.17564	0.466667	-0.352542	-0.243386	0.542714	2.74691	1.28571	-0.594937	0.781437
0.704918	0.384615	-0.159363	0.447307	0.151163	-0.0838964	0.712766	1.60608	1.13314	0.390476	-0.332203	-0.164021	0.603015	2.83333	1.33977	-0.550633	0.697605
0.745902	0.365385	-0.155378	0.441686	0.232558	-0.0957207	0.907801	1.66773	1.01841	0.438095	-0.342373	-0.15873	0.582915	2.6358	1.23938	-0.594937	0.715569
0.655738	0.269231	-0.187251	0.409368	0.174419	-0.114583	1.00709	1.66213	1.1119	0.3	-0.362712	-0.153439	0.472362	2.71605	1.30116	-0.613924	0.853293
0.729508	0.346154	-0.179283	0.414052	0.232558	-0.0993806	1.18794	1.64291	1.14731	0.271429	-0.383051	-0.216931	0.482412	2.66667	1.17761	-0.601266	0.643713
0.754098	0.461538	-0.201195	0.427166	0.244186	-0.0900901	1.03546	1.66133	1.17847	0.247619	-0.355932	-0.248677	0.457286	2.51235	1.09653	-0.594937	0.541916
0.606557	0.307692	-0.175299	0.420609	0.313953	-0.0819257	1.06383	1.57166	1.11756	0.238095	-0.38983	-0.206349	0.467337	2.42593	1.0695	-0.56962	0.592814
0.631148	0.365385	-0.207171	0.427166	0.127907	-0.0892455	1.14539	1.48679	1.09207	0.233333	-0.372881	-0.0899471	0.517588	2.30247	1.03475	-0.607595	0.60479
0.680328	0.326923	-0.201195	0.424356	0.104651	-0.0869932	1.19149	1.46517	1.11048	0.17619	-0.328814	-0.269841	0.472362	2.37654	0.976834	-0.664557	0.778443
0.590164	0.346154	-0.201195	0.385012	0.232558	-0.0678491	1.21631	1.44756	1.18697	0.133333	-0.352542	-0.222222	0.452261	2.23457	1.09266	-0.613924	0.664671
0.57377	0.423077	-0.2251	0.375644	0.104651	-0.0616554	1.16667	1.33467	1.13456	0.219048	-0.383051	-0.169312	0.38191	2.31481	0.953668	-0.664557	0.685629
0.540984	0.326923	-0.205179	0.345199	0	-0.066723	1.14184	1.34668	1.16289	0.190476	-0.376271	-0.222222	0.502513	2.19136	0.969112	-0.582278	0.637725
0.532787	0.346154	-0.233068	0.340984	0.0581395	-0.00844595	1.07092	1.2498	1.18414	0.119048	-0.352542	-0.248677	0.38191	2.2963	0.965251	-0.632911	0.550898
0.442623	0.25	-0.221116	0.350351	0.127907	-0.035473	1.10993	1.245	1.23796	0.12381	-0.416949	-0.243386	0.462312	2.25926	0.976834	-0.588608	0.51497
0.483607	0.0769231	-0.2251	0.311475	0.116279	-0.0106982	1.06383	1.18575	1.23229	0.0761905	-0.488136	-0.174603	0.507538	1.90741	0.942085	-0.620253	0.42515
0.459016	0.288462	-0.213147	0.281499	0.0348837	-0.0171734	1.12057	1.19616	1.2068	0.142857	-0.416949	-0.042328	0.356784	2.17901	0.849421	-0.556962	0.419162
0.459016	0.442308	-0.227092	0.299766	0.0930233	-0.0292793	0.960993	1.21857	1.09632	0.119048	-0.410169	-0.238095	0.296482	2	0.861004	-0.626582	0.473054
0.418033	0.269231	-0.252988	0.352225	0.0116279	-0.035473	0.978723	1.23779	1.1813	0.00952381	-0.423729	-0.216931	0.221106	2.02469	0.899614	-0.601266	0.389222
0.336066	0.384615	-0.252988	0.279625	0	-0.027027	0.929078	1.19616	1.10765	0.047619	-0.450847	-0.100529	0.271357	2.17284	0.810811	-0.531646	0.353293
0.393443	0.173077	-0.268924	0.315691	-0.0232558	-0.0625	0.829787	1.15452	1.21105	0.0714286	-0.423729	-0.100529	0.226131	1.90741	0.772201	-0.56962	0.58982
0.352459	0.326923	-0.284861	0.291803	0.186047	-0.0529279	0.783688	1.17374	1.01133	0.0571429	-0.40339	-0.253968	0.40201	1.87654	0.706564	-0.620253	0.323353
0.418033	0.230769	-0.272908	0.270726	-0.0348837	-0.0349099	0.741135	1.22498	1.03541	0.0619048	-0.447458	-0.232804	0.201005	1.96296	0.698842	-0.594937	0.371257
0.286885	0.307692	-0.286853	0.240749	0.0465116	-0.0447635	0.592199	1.14892	1.06232	0.00952381	-0.38983	-0.164021	0.211055	2.14815	0.675676	-0.550633	0.458084
0.262295	0.384615	-0.290837	0.256206	0.0813954	-0.0537725	0.602837	1.13371	1.0255	0.0142857	-0.454237	-0.116402	0.261307	1.7963	0.598456	-0.556962	0.335329
0.311475	0.211538	-0.308765	0.237471	0.186047	-0.0509572	0.64539	1.15853	0.985836	-0.0285714	-0.440678	-0.269841	0.246231	1.85185	0.65251	-0.601266	0.38024
0.237705	0.211538	-0.286853	0.207494	0.0930233	-0.0548986	0.578014	1.08247	1.0779	-0.00952381	-0.474576	-0.216931	0.18593	1.76543	0.69112	-0.613924	0.335329
0.377049	0.173077	-0.288845	0.206557	0.0697674	-0.0703829	0.51773	1.07766	0.966006	-0.0142857	-0.447458	-0.185185	0.241206	1.80247	0.586873	-0.613924	0.371257
0.336066	0.0576923	-0.294821	0.192037	-0.0581395	-0.0709459	0.592199	1.10809	0.944759	-0.104762	-0.440678	-0.253968	0.276382	1.67901	0.586873	-0.632911	0.251497
0.295082	0.192308	-0.278884	0.203279	-0.0348837	-0.0726351	0.450355	1.08647	0.879603	0.0333333	-0.461017	-0.0952381	0.175879	1.66049	0.6139	-0.601266	0.320359
0.262295	0.230769	-0.284861	0.179859	-0.0465116	-0.0934685	0.400709	1.11769	0.985836	0.0380952	-0.338983	-0.190476	0.251256	1.69136	0.505791	-0.64557	0.299401
0.237705	0.0769231	-0.282869	0.162998	0.127907	-0.0951577	0.510638	1.08006	0.879603	-0.00952381	-0.450847	-0.238095	0.261307	1.54321	0.544402	-0.677215	0.401198
0.221311	0.25	-0.268924	0.193911	0.0930233	-0.115991	0.489362	1.10008	0.946176	0.0285714	-0.491525	-0.201058	0.20603	1.46296	0.420849	-0.588608	0.278443
0.245902	-0.0576923	-0.276892	0.226698	0.337209	-0.134572	0.393617	1.09047	0.898017	-0.0761905	-0.477966	-0.195767	0.246231	1.46914	0.428571	-0.651899	0.308383
0.286885	0.0576923	-0.282869	0.221077	0.151163	-0.139358	0.485816	0.995997	0.903683	-0.052381	-0.433898	-0.238095	0.311558	1.54938	0.366795	-0.658228	0.284431
0.254098	0.269231	-0.284861	0.199532	-0.0930233	-0.146115	0.361702	1.00801	0.936261	-0.17619	-0.447458	-0.338624	0.21608	1.72222	0.563707	-0.601266	0.299401
0.229508	0.173077	-0.294821	0.200468	0.0348837	-0.130068	0.297872	0.903923	0.876771	-0.166667	-0.379661	-0.259259	0.0904523	1.70988	0.471042	-0.670886	0.242515
0.262295	0.0384615	-0.260956	0.148946	0.255814	-0.165541	0.308511	0.972778	0.886686	-0.161905	-0.444068	-0.275132	0.221106	1.66667	0.482625	-0.550633	0.320359
0.254098	0.0192308	-0.272908	0.162061	-0.0116279	-0.176239	0.265957	0.928743	0.975921	-0.119048	-0.511864	-0.216931	0.221106	1.46296	0.528958	-0.601266	0.275449
0.311475	0.0576923	-0.300797	0.134895	-0.0232558	-0.179617	0.27305	0.931145	0.868272	-0.171429	-0.420339	-0.232804	0.080402	1.50617	0.471042	-0.607595	0.335329
0.286885	0.0192308	-0.300797	0.162998	0.0465116	-0.186655	0.106383	0.957566	0.838527	-0.209524	-0.444068	-0.222222	0.18593	1.61111	0.389961	-0.594937	0.251497
0.254098	0.269231	-0.2749	0.189227	0.0348837	-0.19116	0.0780142	0.855084	0.835694	-0.257143	-0.423729	-0.185185	0.0904523	1.62963	0.409266	-0.651899	0.194611
0.327869	0.134615	-0.300797	0.20281	-0.0465116	-0.20214	0.0602837	0.847878	0.729462	-0.209524	-0.440678	-0.201058	0.251256	1.46296	0.416988	-0.582278	0.227545
0.254098	0.0576923	-0.278884	0.223888	0.104651	-0.182151	0.0744681	0.84948	0.77762	-0.180952	-0.427119	-0.174603	0.180905	1.5	0.332046	-0.664557	0.185629
0.213115	0.134615	-0.298805	0.170492	0.0232558	-0.162444	0.148936	0.818255	0.699717	-0.185714	-0.383051	-0.148148	0.236181	1.55556	0.42471	-0.626582	0.206587
0.221311	0	-0.286853	0.164871	-0.0697674	-0.181306	0.0992908	0.805444	0.686969	-0.22381	-0.38983	-0.222222	0.271357	1.45679	0.355212	-0.56962	0.194611
0.188525	0.211538	-0.278884	0.180796	0.104651	-0.211712	0.184397	0.798239	0.696884	-0.204762	-0.352542	-0.0687831	0.115578	1.5	0.382239	-0.626582	0.164671
0.213115	0.288462	-0.294821	0.164403	0.0465116	-0.189752	0.113475	0.816653	0.720963	-0.233333	-0.237288	-0.126984	0.135678	1.3642	0.335907	-0.664557	0.215569
0.180328	0.173077	-0.312749	0.179859	-0.0813954	-0.221284	0.148936	0.767014	0.66289	-0.247619	-0.284746	-0.0846561	0.261307	1.27778	0.339768	-0.632911	0.293413
0.221311	0.173077	-0.282869	0.155035	-0.0232558	-0.219032	0.102837	0.734988	0.609065	-0.328571	-0.39322	-0.206349	0.291457	1.27778	0.289575	-0.506329	0.182635
0.188525	0.173077	-0.302789	0.134895	0.127907	-0.21509	0.152482	0.853483	0.644476	-0.252381	-0.379661	-0.185185	0.115578	1.5	0.362934	-0.677215	0.176647
0.172131	0.211538	-0.308765	0.130211	-0.197674	-0.182151	0.0957447	0.806245	0.535411	-0.261905	-0.427119	-0.148148	0.130653	1.44444	0.285714	-0.64557	0.152695
0.163934	0.288462	-0.294821	0.132553	-0.0116279	-0.204955	0.117021	0.795036	0.593484	-0.309524	-0.423729	-0.206349	0.165829	1.37037	0.416988	-0.64557	0.0898204
0.155738	0.269231	-0.304781	0.0824356	-0.0581395	-0.202703	0.106383	0.767014	0.542493	-0.261905	-0.40678	-0.169312	0.115578	1.40123	0.289575	-0.664557	0.152695
0.106557	0.230769	-0.304781	0.124122	0.0232558	-0.214809	0.109929	0.732586	0.548159	-0.247619	-0.410169	-0.26455	0.140704	1.35802	0.262548	-0.575949	0.197605
0.155738	0.153846	-0.326693	0.134895	0.0116279	-0.209178	0.12766	0.683747	0.621813	-0.280952	-0.420339	-0.15873	0.115578	1.25926	0.316602	-0.556962	0.128743
0.204918	0.173077	-0.318725	0.155504	-0.127907	-0.23339	0.0602837	0.675741	0.624646	-0.295238	-0.383051	-0.179894	0.0452261	1.19136	0.343629	-0.601266	0.125749
0.106557	0.173077	-0.308765	0.117564	-0.127907	-0.243243	0.0531915	0.730985	0.573654	-0.304762	-0.315254	-0.31746	-0.0552764	1.29012	0.335907	-0.651899	0.248503
0.172131	0.153846	-0.326693	0.116628	-0.139535	-0.255912	0.0425532	0.646117	0.644476	-0.309524	-0.247458	-0.253968	0.0904523	1.27778	0.262548	-0.531646	0.254491
0.229508	0.0576923	-0.308765	0.136768	0.0116279	-0.27393	0.0673759	0.644516	0.650142	-0.342857	-0.298305	-0.227513	0.165829	1.20988	0.212355	-0.601266	0.176647
0.0983607	0.173077	-0.278884	0.098829	0.0348837	-0.275056	0.035461	0.646918	0.672805	-0.314286	-0.288136	-0.169312	0.0502513	1.38272	0.324324	-0.556962	0.182635
0.155738	0.0384615	-0.318725	0.11007	-0.0116279	-0.296734	0.0851064	0.596477	0.651558	-0.328571	-0.318644	-0.190476	-0.0100503	1.27778	0.177606	-0.677215	0.218563
0.155738	0.0384615	-0.334661	0.0983607	-0.0581395	-0.264077	0.0390071	0.597278	0.611898	-0.361905	-0.332203	-0.0846561	-0.0100503	1.2037	0.204633	-0.620253	0.221557
0.188525	0.134615	-0.344622	0.120375	0.0116279	-0.226914	-0.0141844	0.601281	0.606232	-0.328571	-0.359322	-0.15873	0.0854271	1.35802	0.181467	-0.632911	0.134731
0.180328	0.0961538	-0.342629	0.123653	-0.197674	-0.221284	0.0567376	0.608487	0.55949	-0.3	-0.366102	-0.153439	0.115578	1.17284	0.166023	-0.620253	0.152695
0.229508	0.0961538	-0.368526	0.0763466	-0.151163	-0.206926	-0.0035461	0.60048	0.600567	-0.352381	-0.355932	-0.216931	0.145729	1.14815	0.138996	-0.550633	0.224551
0.172131	0	-0.332669	0.0637002	-0.209302	-0.211149	-0.0106383	0.606085	0.53966	-0.380952	-0.355932	-0.269841	0.110553	1.30247	0.127413	-0.607595	0.275449
0.155738	0	-0.326693	0.095082	-0.139535	-0.206081	-0.0035461	0.615693	0.652974	-0.371429	-0.277966	-0.259259	0.155779	1.19753	0.254826	-0.575949	0.194611
0.139344	-0.0961538	-0.330677	0.0501171	-0.0813954	-0.202421	0.120567	0.620496	0.535411	-0.309524	-0.318644	-0.164021	0.155779	1.08025	0.127413	-0.639241	0.203593
0.237705	0.0192308	-0.37251	0.0515222	-0.0930233	-0.213401	-0.0780142	0.570056	0.575071	-0.32381	-0.284746	-0.174603	0.0904523	1.16049	0.0540541	-0.632911	0.167665
0.163934	-0.0192308	-0.338645	0.0627635	-0.116279	-0.215935	-0.0531915	0.570056	0.620397	-0.357143	-0.318644	-0.280423	0.160804	1.10494	0.131274	-0.575949	0.176647
0.204918	0.0961538	-0.338645	0.0618267	-0.0581395	-0.239583	-0.117021	0.516413	0.590652	-0.319048	-0.271186	-0.0793651	0.110553	1.12346	0.135135	-0.537975	0.158683
0.155738	0.134615	-0.356574	0.0655738	0.0581395	-0.230856	-0.106383	0.66213	0.538244	-0.342857	-0.345763	-0.243386	0.18593	1.11728	0.100386	-0.493671	0.164671
0.196721	0.0769231	-0.346614	0.0913349	0.0581395	-0.220158	-0.159574	0.571657	0.458924	-0.32381	-0.294915	-0.206349	0.150754	1.06173	0.127413	-0.525316	0.194611
0.172131	-0.0769231	-0.340637	0.0655738	-0.186047	-0.238739	-0.102837	0.473179	0.453258	-0.366667	-0.342373	-0.216931	0.201005	1.1358	0.15444	-0.575949	0.101796
0.180328	-0.0384615	-0.338645	0.0894614	-0.139535	-0.220158	-0.180851	0.501201	0.347025	-0.37619	-0.261017	-0.269841	0.0552764	1.11111	0.0888031	-0.594937	0.164671
0.131148	0.0769231	-0.340637	0.0735363	-0.162791	-0.23339	-0.141844	0.534828	0.426346	-0.309524	-0.291525	-0.26455	0.321608	1.01235	0.0888031	-0.537975	0.221557
0.172131	-0.0769231	-0.312749	0.0552693	0.0581395	-0.201858	-0.14539	0.52442	0.318697	-0.385714	-0.288136	-0.248677	0.120603	1.06173	0.0694981	-0.537975	0.191617
0.180328	-0.115385	-0.320717	0.0477752	0.0813954	-0.204955	-0.131206	0.526021	0.310198	-0.404762	-0.345763	-0.259259	0.155779	0.938272	0.111969	-0.5	0.128743
0.122951	-0.0961538	-0.322709	0.0370023	-0.0465116	-0.2058	-0.187943	0.541233	0.304533	-0.352381	-0.325424	-0.291005	0.140704	0.925926	0.189189	-0.443038	0.0868263
0.188525	-0.0576923	-0.318725	0.0360656	-0.0232558	-0.220721	-0.113475	0.52522	0.219547	-0.409524	-0.332203	-0.269841	0.150754	1.06173	0.138996	-0.525316	0.185629
0.254098	-0.0769231	-0.316733	0.0285714	0	-0.278998	-0.0957447	0.570857	0.192635	-0.395238	-0.325424	-0.301587	0.246231	0.95679	0.142857	-0.43038	0.179641
0.188525	-0.0384615	-0.326693	0.0370023	0.0116279	-0.300957	-0.0815603	0.513211	0.293201	-0.428571	-0.332203	-0.195767	0.241206	0.925926	0.0810811	-0.474684	0.0568862
0.163934	-0.173077	-0.292829	0.0177986	0.0930233	-0.286318	-0.0638298	0.550841	0.253541	-0.352381	-0.345763	-0.338624	0.39196	0.845679	-0.019305	-0.455696	0.0868263
0.131148	-0.115385	-0.320717	0.0135831	-0.0116279	-0.248311	-0.0283688	0.568455	0.247875	-0.419048	-0.372881	-0.396825	0.286432	0.679012	0.0656371	-0.525316	0.0718563
0.188525	-0.0769231	-0.324701	-0.00234192	-0.0116279	-0.20411	-0.035461	0.575661	0.24221	-0.42381	-0.318644	-0.312169	0.341709	0.808642	0.027027	-0.449367	0.170659
0.131148	-0.0384615	-0.326693	-0.018267	0.22093	-0.219032	-0.0425532	0.589271	0.252125	-0.414286	-0.372881	-0.396825	0.271357	0.839506	0.0656371	-0.35443	0.179641
0.122951	-0.0192308	-0.306773	-0.0252927	0.0581395	-0.20411	-0.0035461	0.519616	0.290368	-0.395238	-0.284746	-0.296296	0.462312	0.67284	-0.023166	-0.164557	0.0748503
0.0737705	0	-0.296813	-0.0501171	-0.0930233	-0.240428	0.0035461	0.52522	0.274788	-0.361905	-0.277966	-0.428571	0.346734	0.679012	0.023166	-0.056962	0.113772
0.114754	-0.0769231	-0.336653	-0.036534	-0.0465116	-0.225507	0.0070922	0.601281	0.331445	-0.361905	-0.274576	-0.312169	0.291457	0.5	0.030888	0.113924	0.158683
0.122951	0.0384615	-0.324701	-0.0355972	-0.0232558	-0.21143	0.0460993	0.486789	0.296034	-0.385714	-0.359322	-0.444444	0.417085	0.598765	0.0772201	0.208861	0.146707
0.114754	0.0576923	-0.320717	-0.0641686	0.0232558	-0.234234	0.0390071	0.495596	0.324363	-0.366667	-0.298305	-0.417989	0.442211	0.635802	-0.015444	0.189873	0.101796
0.057377	-0.134615	-0.314741	-0.0196721	0.162791	-0.23705	0.0319149	0.502002	0.355524	-0.366667	-0.274576	-0.269841	0.462312	0.697531	0.003861	0.120253	0.137725
0.0737705	0.0384615	-0.334661	-0.052459	-0.0116279	-0.222691	-0.0567376	0.519616	0.354108	-0.433333	-0.311864	-0.42328	0.386935	0.691358	0.046332	0.189873	0.0658683
0.131148	-0.115385	-0.340637	-0.0599532	-0.0813954	-0.213401	-0.070922	0.534027	0.409348	-0.428571	-0.332203	-0.238095	0.507538	0.635802	-0.03861	0.177215	0.0359281
0.131148	-0.0192308	-0.356574	-0.0838408	-0.0813954	-0.221847	0.0035461	0.565252	0.342776	-0.447619	-0.335593	-0.375661	0.311558	0.462963	0.0617761	0.0759494	0.0329341
0.131148	0.0769231	-0.350598	-0.0580796	-0.0348837	-0.232827	0.0177305	0.5004	0.332861	-0.428571	-0.291525	-0.42328	0.361809	0.493827	0.027027	0.170886	0.0449102
0.0655738	-0.134615	-0.336653	-0.106792	-0.0813954	-0.230856	0.0531915	0.569255	0.223796	-0.404762	-0.271186	-0.37037	0.351759	0.537037	-0.023166	0.113924	0.0389222
0.114754	0.0384615	-0.350598	-0.119906	-0.0465116	-0.244932	0.0283688	0.569255	0.212465	-0.385714	-0.281356	-0.301587	0.301508	0.462963	-0.050193	0.329114	0.0538922
0.0409836	0.0961538	-0.346614	-0.127869	0.0348837	-0.283784	0.0283688	0.542034	0.259207	-0.409524	-0.315254	-0.338624	0.366834	0.740741	-0.015444	0.183544	0.0299401
0.057377	-0.0769231	-0.374502	-0.101171	0.0348837	-0.270552	0.0283688	0.547638	0.29745	-0.438095	-0.298305	-0.359788	0.417085	0.382716	-0.030888	0.113924	0.00299401
0.0901639	-0.0961538	-0.38247	-0.130679	0.0697674	-0.243525	-0.0106383	0.527622	0.349858	-0.480952	-0.342373	-0.343915	0.356784	0.333333	-0.030888	0.164557	0.110778
0.122951	-0.0769231	-0.398406	-0.106792	0	-0.258164	-0.0283688	0.581265	0.475921	-0.442857	-0.311864	-0.306878	0.256281	0.382716	-0.023166	0.221519	0.0658683
0.057377	-0.0192308	-0.39243	-0.124122	-0.104651	-0.255912	-0.0673759	0.550841	0.545326	-0.390476	-0.325424	-0.328042	0.417085	0.388889	-0.142857	0.297468	0.128743
0.057377	-0.0961538	-0.412351	-0.123185	-0.0930233	-0.27393	-0.0531915	0.590873	0.550991	-0.4	-0.338983	-0.444444	0.356784	0.358025	-0.0579151	0.310127	0.0389222
0.114754	-0.0576923	-0.388446	-0.140984	-0.0465116	-0.25732	-0.0815603	0.558847	0.584986	-0.461905	-0.298305	-0.433862	0.447236	0.333333	-0.0617761	0.158228	-0.00299401
0.0901639	0.0769231	-0.37251	-0.171897	0.0465116	-0.267736	-0.0886525	0.522018	0.597734	-0.42381	-0.291525	-0.412698	0.351759	0.364198	-0.0849421	0.329114	-0.00898204
0.0327869	-0.0576923	-0.406375	-0.148009	0.104651	-0.295045	-0.0319149	0.509207	0.529745	-0.466667	-0.216949	-0.31746	0.41206	0.438272	-0.0849421	0.278481	-0.0239521
0.057377	-0.0769231	-0.414343	-0.173302	0.104651	-0.287162	-0.0992908	0.542834	0.565156	-0.414286	-0.315254	-0.248677	0.417085	0.333333	0	0.227848	0.0239521
0.106557	-0.0384615	-0.400398	-0.172834	-0.116279	-0.312218	-0.113475	0.517214	0.5	-0.533333	-0.250847	-0.402116	0.341709	0.253086	-0.042471	0.322785	0.0239521
0.0655738	0.0769231	-0.404382	-0.174707	-0.0465116	-0.330518	-0.0496454	0.510008	0.46034	-0.395238	-0.352542	-0.349206	0.341709	0.290123	-0.0540541	0.227848	0.0508982
0.122951	-0.173077	-0.400398	-0.203747	-0.0581395	-0.32911	0.0035461	0.510809	0.478754	-0.409524	-0.264407	-0.343915	0.321608	0.283951	-0.0772201	0.322785	0.011976
0.057377	-0.0961538	-0.412351	-0.183138	-0.209302	-0.317005	0.0496454	0.497998	0.410765	-0.442857	-0.288136	-0.248677	0.261307	0.302469	0.023166	0.272152	0.0179641
0.057377	-0.0576923	-0.420319	-0.201874	-0.139535	-0.324606	0.0460993	0.424339	0.444759	-0.461905	-0.291525	-0.227513	0.331658	0.234568	0.003861	0.436709	0.0568862
0.0819672	-0.0769231	-0.426295	-0.180328	-0.104651	-0.321509	0	0.486789	0.427762	-0.433333	-0.342373	-0.386243	0.40201	0.308642	0.003861	0.487342	0.107784
0.0327869	0	-0.424303	-0.211241	-0.139535	-0.334459	-0.0390071	0.434748	0.402266	-0.5	-0.335593	-0.428571	0.291457	0.407407	-0.019305	0.291139	0.0479042
0.0163934	-0.0961538	-0.416335	-0.207963	-0.0348837	-0.370495	0.0070922	0.401922	0.327195	-0.447619	-0.332203	-0.291005	0.301508	0.216049	-0.0772201	0.335443	0.0748503
0.00819672	-0.0961538	-0.442231	-0.196253	-0.116279	-0.359516	0.070922	0.391513	0.389518	-0.457143	-0.305085	-0.338624	0.165829	0.320988	-0.030888	0.335443	-0.0179641
-0.0245902	0.0769231	-0.436255	-0.177986	-0.22093	-0.368806	0.0070922	0.405124	0.416431	-0.495238	-0.345763	-0.285714	0.271357	0.296296	-0.00772201	0.303797	0.0239521
0.00819672	0	-0.426295	-0.207963	-0.174419	-0.348255	-0.0567376	0.447558	0.284703	-0.504762	-0.349153	-0.391534	0.266332	0.382716	-0.03861	0.208861	0.00598802
0.0819672	-0.115385	-0.466135	-0.170023	-0.197674	-0.373311	-0.0248227	0.440352	0.324363	-0.442857	-0.311864	-0.26455	0.39196	0.277778	-0.00772201	0.455696	0.00898204
0.0245902	0.115385	-0.448207	-0.211241	-0.127907	-0.364302	-0.0921986	0.345877	0.369688	-0.457143	-0.325424	-0.37037	0.231156	0.314815	-0.030888	0.265823	0.0359281
-0.0245902	-0.0384615	-0.432271	-0.199063	-0.186047	-0.361768	-0.131206	0.385108	0.405099	-0.52381	-0.315254	-0.343915	0.321608	0.425926	-0.027027	0.493671	0.128743
0	0.0384615	-0.452191	-0.184075	-0.0930233	-0.35473	-0.0921986	0.310649	0.439093	-0.5	-0.318644	-0.243386	0.211055	0.277778	-0.042471	0.417722	0.0688623
0.0819672	0.0384615	-0.460159	-0.187354	-0.22093	-0.366273	-0.170213	0.333867	0.320113	-0.485714	-0.338983	-0.354497	0.251256	0.271605	-0.030888	0.341772	0.167665
0.00819672	-0.0384615	-0.515936	-0.205621	-0.0930233	-0.364865	-0.159574	0.343475	0.3017	-0.504762	-0.308475	-0.31746	0.276382	0.308642	-0.108108	0.259494	0.128743
0.057377	-0.153846	-0.549801	-0.209836	-0.0465116	-0.344876	-0.102837	0.263411	0.284703	-0.447619	-0.379661	-0.343915	0.396985	0.259259	-0.042471	0.303797	0.182635
-0.0245902	-0.0576923	-0.525896	-0.198126	-0.0581395	-0.361205	-0.109929	0.21297	0.332861	-0.533333	-0.342373	-0.354497	0.201005	0.290123	-0.0849421	0.575949	0.131737
0.0491803	-0.0961538	-0.52988	-0.194379	-0.116279	-0.369932	-0.0390071	0.163331	0.368272	-0.47619	-0.257627	-0.328042	0.296482	0.234568	-0.023166	0.405063	0.167665
0.00819672	-0.115385	-0.52988	-0.217799	0.0348837	-0.3567	-0.070922	0.0952762	0.267705	-0.461905	-0.376271	-0.132275	0.276382	0.246914	0.003861	0.405063	0.152695
0.0655738	0.0192308	-0.575697	-0.191569	-0.0813954	-0.363457	-0.0921986	0.0944756	0.3017	-0.52381	-0.349153	-0.412698	0.221106	0.185185	0.023166	0.436709	0.134731
0.00819672	0.0384615	-0.553785	-0.216393	-0.139535	-0.375	-0.152482	0.0584468	0.293201	-0.471429	-0.298305	-0.301587	0.190955	0.123457	-0.03861	0.398734	0.0988024
0.0245902	0.0769231	-0.569721	-0.228571	-0.0813954	-0.35107	-0.187943	-0.0136109	0.334278	-0.519048	-0.308475	-0.275132	0.120603	0.265432	-0.019305	0.322785	0.134731
0.00819672	0.0576923	-0.561753	-0.235129	-0.139535	-0.362613	-0.276596	-0.0336269	0.291785	-0.514286	-0.322034	-0.26455	0.165829	0.111111	0.042471	0.335443	0.0359281
0.0163934	-0.0961538	-0.535857	-0.242623	-0.162791	-0.372466	-0.223404	-0.11209	0.252125	-0.561905	-0.383051	-0.37037	0.231156	0.123457	0.03861	0.392405	0.0838323

## Sheet: single-opposite
15.4.2024				18.4.2024						22.04.2024
worm5	worm6	worm7	worm8	worm1	worm3	worm4	worm5	worm6		worm1	worm2	worm4	worm5
video11-a	video12	video15	video19	video1	vido7	video9	video17	video20	video21	video1	video6	video11-p	video16
-1	-1	-1	-1	-1	-1	-1	-1	-1	-1	-1	-1	-1	-1
0.075	0.38806	0.287425	0.356662	0.0854701	0.249089	0.0532319	0.160556	0.0439024	0.0473684	-0.0460526	-0.0381679	0.245902	0.0987261
0.0333333	0.0597015	0.217066	0.315612	-0.102564	0.201701	0.0475285	0.0771176	-0.0341463	0.1	-0.0131579	0.148855	0.125683	0.159236
0.0666667	0.0746269	0.163174	0.269179	-0.0854701	0.178615	0.039924	0.108723	-0.0390244	0.0315789	0	-0.0458015	0.0983607	0.089172
0	0.313433	0.122754	0.240242	-0.102564	0.145808	0.00760456	0.0998736	0.0536585	0.136842	-0.0394737	-0.0267176	0.10929	0.197452
0.0583333	0.19403	0.107784	0.195155	0.0512821	0.113001	0.0228137	0.0594185	0.107317	0	-0.125	-0.110687	0.0983607	0.0859873
0.0916667	0.19403	0.0868263	0.176312	-0.025641	0.130012	0.00380228	0.117573	0.131707	0.0421053	0.0789474	-0.0496183	0.0546448	0.044586
0.0833333	0.0149254	0.0538922	0.159489	-0.0683761	0.121507	0.0513308	0.0745891	0.0926829	0.0526316	-0.0592105	-0.0572519	0.0765027	0.066879
0.00833333	0.0597015	0.0254491	0.146703	-0.111111	0.136087	0.00570342	0.034134	0.117073	-0.110526	0	-0.0572519	0.0218579	0.0318471
-0.05	0.0895522	-0.00449102	0.145357	-0.102564	0.115431	0.0722433	0.0884956	0.0536585	-0.0578947	-0.138158	-0.0916031	0.120219	0.0509554
-0.0583333	0.119403	-0.0374251	0.129879	-0.0512821	0.103281	-0.0171103	0.0960809	0.0341463	-0.0526316	0.0328947	0	0.0710383	0.0254777
-0.075	0.0298507	-0.0673653	0.10969	-0.025641	0.151883	-0.0171103	0.0379267	0.0780488	0	-0.190789	0	0.103825	0.00636943
-0.0916667	0	-0.0673653	0.131898	0.128205	0.111786	0	0.0202276	-0.0292683	-0.0789474	-0.0394737	-0.0572519	-0.010929	-0.022293
-0.0916667	0.0447761	-0.0523952	0.109017	-0.0598291	0.102066	0.0456274	0.0316056	-0.0146341	-0.0421053	-0.0197368	-0.0801527	-0.0874317	0.089172
-0.0833333	-0.0149254	-0.0434132	0.0921938	-0.0683761	0.149453	0.129278	0.0379267	0.0292683	-0.163158	-0.0328947	-0.110687	0.136612	0.0191083
-0.075	0.0149254	-0.0419162	0.115747	0.0598291	0.105711	0.0722433	0.0366625	0.0341463	-0.131579	-0.0789474	-0.0419847	-0.0327869	-0.022293
-0.0833333	-0.0149254	-0.0344311	0.113728	0.034188	0.106926	0.114068	0.10493	0.0341463	-0.163158	-0.0657895	-0.0496183	-0.0710383	-0.0254777
-0.0666667	-0.0149254	-0.0179641	0.0827725	-0.034188	0.117861	0.117871	0.00884956	-0.00487805	-0.121053	-0.0394737	-0.0152672	-0.0437158	0.0605096
-0.05	-0.0298507	-0.011976	0.0975774	0.196581	0.0413123	0.117871	0.0594185	0.0634146	-0.0894737	-0.00657895	-0.10687	-0.0655738	-0.0700637
-0.125	0	-0.0239521	0.0699865	0.0854701	0.0789793	0.155894	0.091024	-0.0341463	-0.0421053	0.0526316	0.0229008	0.125683	-0.0318471
-0.075	-0.0149254	-0.0359281	0.0565276	0.0512821	0.144593	0.11597	0.045512	0.0731707	-0.110526	0.0197368	-0.0458015	-0.0819672	-0.0254777
-0.116667	0.0298507	-0.0449102	0.0356662	-0.0598291	0.0753341	0.209125	0.068268	-0.121951	-0.0421053	-0.0263158	-0.0954198	-0.103825	0.044586
-0.1	-0.0298507	-0.0658683	0.0572005	-0.0854701	0.0886999	0.125475	0.0366625	-0.0682927	-0.0368421	-0.125	-0.0648855	-0.0983607	-0.0828025
-0.0166667	0	-0.0568862	0.0423957	-0.0683761	0.0886999	0.102662	0.0164349	-0.15122	-0.110526	0.184211	0	0.0218579	0.0414013
-0.0916667	0.0149254	-0.0538922	0.0585464	0.0598291	0.0814095	0.0931559	0.0278129	-0.156098	-0.0526316	0.0855263	-0.0954198	-0.0765027	0.00318471
0	0	-0.0583832	0.0363392	-0.025641	0.0510328	0.0532319	0.0720607	-0.0585366	0.0789474	-0.0855263	-0.0610687	-0.0546448	-0.0509554
-0.1	0.0447761	-0.0523952	0.0235532	-0.0512821	0.0838396	0.0931559	0.0998736	-0.0634146	-0.0421053	-0.0789474	-0.0801527	-0.0710383	0.00955414
-0.0916667	-0.0447761	-0.0598802	0.013459	-0.111111	0.0072904	0.0836502	0.0556258	-0.131707	0.00526316	-0.0131579	-0.0572519	-0.0765027	0.0191083
-0.025	-0.0447761	-0.0314371	0.0148048	0.017094	0.0170109	0.127376	0.0670038	-0.0780488	0.0473684	-0.0723684	-0.019084	-0.0163934	-0.0159236
-0.0416667	-0.0746269	-0.0359281	0	-0.0512821	0.0145808	0.0722433	0.0758533	-0.0634146	-0.0421053	0.0723684	0.0267176	0.0437158	0.00636943
-0.0666667	-0.0746269	-0.0269461	-0.00201884	-0.145299	0.0388821	0.0703422	0.0606827	-0.112195	-0.0473684	0.0986842	-0.0954198	-0.142077	0.0414013
-0.00833333	-0.0895522	-0.010479	-0.00134589	0.042735	0.0595383	0.0570342	0.0543616	-0.0146341	-0.0105263	0.217105	-0.0534351	-0.0601093	0.00955414
-0.1	0	-0.0224551	0.000672947	-0.00854701	0.0558931	0.0646388	0.121365	-0.097561	-0.0578947	0.0657895	-0.0152672	-0.0218579	0.0127389
-0.0166667	-0.0298507	-0.00598802	-0.000672947	0.00854701	0.0315917	0.0285171	0.0847029	-0.0390244	0.142105	-0.0197368	-0.0534351	-0.0546448	0.0127389
-0.1	-0.0597015	0	-0.000672947	-0.145299	0.0400972	0.013308	0.11378	-0.0585366	-0.0157895	0.0526316	-0.0648855	0.00546448	0
-0.075	0.19403	0.0239521	0	-0.00854701	0.0583232	0.00190114	0.117573	-0.141463	-0.0210526	0.0789474	0.019084	0.0218579	-0.0764331
-0.0583333	-0.0298507	0	0.00538358	0.0769231	0.0631835	-0.0228137	0.0707965	-0.107317	0.0526316	0.0197368	-0.0648855	-0.0218579	0.0414013
-0.0833333	-0.0597015	0.0149701	0.0100942	-0.0769231	0.0340219	0.00190114	0.0695322	-0.121951	0.0368421	0.0855263	0	-0.0655738	0.0414013
-0.0333333	0.0597015	0.011976	0.00672948	0.162393	0.0267315	-0.0114068	0.115044	-0.0926829	0.0473684	-0.0197368	-0.0343511	-0.131148	0.044586
-0.075	-0.0447761	0.0269461	0.0161507	-0.0940171	0.0400972	0.0247148	0.0518331	-0.097561	-0.0315789	0.0460526	-0.0610687	-0.0491803	0.0414013
0	-0.0447761	0.0254491	0.0141319	-0.0854701	0.0255164	0.0285171	0.102402	0.0097561	0.0368421	0.223684	-0.0534351	0.0163934	-0.0127389
-0.00833333	-0.134328	0.0179641	-0.00201884	-0.0940171	0.0303767	0.00570342	0.0543616	-0.0731707	-0.115789	0.0328947	-0.0267176	-0.0273224	-0.0159236
0.0333333	0.0447761	0.0374251	0.00471063	0.0854701	0.0473876	-0.0323194	0.0556258	-0.102439	0.00526316	-0.0197368	-0.0610687	-0.0218579	-0.00955414
0.0416667	-0.0895522	0.0314371	0.0188425	0.025641	0.00972054	-0.0475285	0.0707965	-0.0829268	0.0368421	0.0526316	-0.0381679	-0.00546448	0.124204
-0.0333333	0.0298507	0.0419162	0.0181696	0.0512821	-0.0243013	-0.0988593	0.0442478	-0.0878049	-0.0421053	0.118421	0.0305344	-0.114754	0.044586
-0.0583333	-0.149254	0.0583832	0.0208614	-0.025641	0.0109356	-0.0893536	0.0417193	-0.0682927	0.0105263	0.0131579	-0.103053	-0.0491803	0.0414013
0	0.0895522	0.0523952	0.0215343	0.025641	-0.0157959	-0.10076	0.0670038	0.0097561	-0.0210526	0.0460526	-0.0572519	-0.0928962	-0.0318471
-0.0333333	-0.0895522	0.0823353	0.00336474	0.0512821	0.0303767	-0.0342205	0.0834387	0.15122	-0.0210526	0.256579	-0.0267176	-0.120219	0
-0.0333333	-0.0746269	0.0853293	-0.00134589	0.0683761	-0.0291616	-0.0437262	-0.00505689	-0.0146341	-0.0526316	0	-0.0954198	-0.0655738	0.133758
-0.108333	-0.0597015	0.0778443	-0.00672948	0.136752	0.0072904	-0.104563	0	-0.0780488	-0.0263158	0.0394737	-0.0763359	0.0710383	-0.00636943
-0.0833333	-0.134328	0.0703593	0.00471063	0.042735	0	-0.0931559	0.0644754	-0.00487805	0	0.197368	-0.0801527	-0.0819672	-0.00318471
-0.025	-0.134328	0.0793413	-0.0148048	-0.0683761	-0.0036452	-0.10076	-0.00505689	0.136585	-0.110526	0.177632	-0.0572519	-0.0273224	0.0382166
-0.108333	-0.0597015	0.0643713	-0.00605653	0.0854701	0.0121507	-0.095057	0.011378	0.204878	-0.0368421	-0.0394737	-0.0839695	-0.10929	-0.00955414
-0.025	0.0149254	0.0793413	-0.0282638	-0.0512821	-0.00850547	-0.106464	0.00884956	0.195122	-0.0315789	0.0197368	-0.0343511	0.0382514	0.0573248
-0.00833333	-0.0746269	0.0793413	-0.0161507	0.111111	0.0376671	-0.0570342	-0.0429836	0.136585	-0.0789474	0.302632	-0.0687023	-0.114754	0.0350318
-0.075	-0.119403	0.0658683	-0.0100942	0.0769231	0.00243013	-0.146388	-0.0290771	0.180488	0.0421053	0	-0.0610687	-0.125683	0.0509554
0	-0.164179	0.0763473	-0.0275908	-0.0512821	-0.0279465	-0.0798479	-0.0493047	0.160976	-0.0894737	0.203947	0.0496183	0.0327869	-0.0541401
-0.0833333	0.0447761	0.0763473	-0.0228802	0.034188	0.018226	-0.0874525	-0.0771176	0.2	0	-0.0657895	-0.0801527	-0.0491803	-0.0414013
-0.00833333	-0.0597015	0.0943114	-0.0242261	0.00854701	-0.0328068	-0.0760456	-0.0884956	0.229268	-0.0210526	-0.0394737	0.0305344	-0.0546448	-0.00318471
-0.0833333	-0.0447761	0.0778443	-0.026245	0	-0.0109356	-0.134981	-0.0897598	0.0878049	-0.0157895	0.0197368	0.0343511	-0.0163934	-0.0636943
0.05	-0.0447761	0.0643713	-0.0174966	0.0940171	-0.0619684	-0.142586	-0.0467762	0.2	0.0842105	0.0657895	0.019084	-0.0327869	0.0286624
-0.025	-0.0447761	0.0598802	-0.00942126	0.145299	-0.036452	-0.127376	-0.10493	0.0682927	0.0157895	0.0328947	0.00763359	0	-0.0541401
0.0666667	0.134328	0.0508982	0.00201884	0.0683761	0	-0.174905	-0.0707965	0.0146341	0.0210526	0.0197368	0.0305344	-0.0327869	0.0382166
0.0833333	0.0298507	0.0389222	-0.00672948	0.034188	-0.0376671	-0.155894	-0.0771176	-0.0341463	-0.147368	-0.0394737	0.00763359	-0.0710383	0.117834
0.025	-0.0895522	0.0239521	-0.00874832	0.136752	-0.0668287	-0.129278	-0.106195	0.0731707	-0.00526316	-0.0394737	0.0152672	0.0327869	0.0191083
0.0833333	0	0.0464072	-0.00269179	0.00854701	-0.0692588	-0.153992	-0.0935525	0.0731707	0	0.0263158	0.00381679	-0.0327869	0.0191083
0.025	0.119403	0.0329341	-0.00874832	0	-0.036452	-0.0817491	-0.17067	-0.131707	0	-0.0723684	0.0343511	0.0710383	0.0700637
0.00833333	0.104478	0.0389222	-0.00403769	0.017094	-0.0400972	-0.155894	-0.108723	-0.0682927	-0.0210526	0	-0.0152672	0.0819672	-0.0955414
0.0333333	0.0149254	0.0553892	-0.00605653	-0.0598291	-0.0643985	-0.108365	-0.168142	-0.0243902	0	-0.0592105	0.0839695	-0.0546448	0.0127389
0.025	0.0597015	0.0703593	-0.0141319	-0.025641	-0.100851	-0.131179	-0.175727	-0.0780488	-0.0157895	-0.0394737	0.019084	0	0.0159236
0.00833333	0.0149254	0.100299	0.00538358	0.119658	-0.0595383	-0.114068	-0.139064	0.0292683	-0.0105263	-0.0986842	0.0381679	0.0163934	-0.00955414
0.0583333	0.0298507	0.0808383	-0.000672947	0.034188	-0.0899149	-0.108365	-0.155499	-0.0487805	0.0578947	-0.0460526	0.0572519	-0.0382514	-0.0477707
0.00833333	-0.0298507	0.0778443	0.00942126	0.145299	-0.0571081	-0.0684411	-0.168142	0.0585366	0.0421053	-0.0789474	0.103053	0.0273224	-0.022293
0.0666667	0.0149254	0.0823353	0.00269179	-0.153846	-0.0935601	-0.0665399	-0.1378	0	0.0210526	0.111842	0.0877863	-0.0928962	-0.00318471
0.05	0.149254	0.0718563	0.0107672	-0.00854701	-0.0935601	-0.0684411	-0.164349	0.00487805	0.0684211	0.0921053	0.0610687	0.0819672	0
0.125	0.0298507	0.0374251	0.0107672	-0.034188	-0.100851	-0.10076	-0.184576	-0.0292683	0.0421053	0	0.0992366	0	0.0382166
0.075	-0.0298507	0	0.0161507	0.00854701	-0.0826245	-0.095057	-0.14665	-0.00487805	0.126316	-0.0789474	0.0496183	0.10929	0.0286624
-0.0333333	-0.0597015	-0.0419162	0.0121131	-0.0854701	-0.123937	-0.142586	-0.180784	-0.0390244	0.0526316	-0.0328947	0.110687	-0.0491803	-0.0127389
0.0416667	0	-0.0284431	0.00672948	0.0769231	-0.110571	-0.0893536	-0.206068	-0.0292683	0	0.0197368	0.0763359	0.114754	0.0605096
0.05	-0.0895522	-0.0284431	-0.00605653	0.017094	-0.111786	-0.039924	-0.198483	0.0341463	0.0526316	-0.00657895	0.0687023	0.0382514	-0.022293
0.05	0.0447761	-0.0224551	-0.0444145	-0.0512821	-0.0789793	-0.0114068	-0.190898	-0.0195122	0.136842	0.00657895	0.0763359	0.0327869	-0.0127389
-0.00833333	-0.0597015	-0.0269461	-0.0659489	0.025641	-0.0984204	0.0095057	-0.176991	0.00487805	0.0473684	0.0197368	0.0801527	-0.0273224	-0.00318471
0.00833333	0.0746269	-0.0434132	-0.0800808	-0.0683761	-0.109356	0.0304183	-0.117573	0.00487805	-0.0157895	-0.0855263	0.167939	0.0655738	0.0254777
0.0166667	0	-0.00598802	-0.0679677	0.034188	-0.114216	0.0418251	-0.0935525	0.0439024	0.131579	0.0328947	0.217557	0.131148	-0.0254777
0.133333	0.0149254	-0.0434132	-0.064603	0.00854701	-0.123937	0.0095057	-0.12263	0.0097561	0.115789	0.00657895	0.133588	0.131148	-0.0191083
0.00833333	0.208955	-0.0568862	-0.0531629	-0.025641	-0.134872	0.0418251	-0.109987	0.0243902	0.0842105	-0.00657895	0.232824	0.0327869	-0.0414013
0.116667	0.0298507	-0.0344311	-0.0450875	0.025641	-0.108141	0.0228137	-0.112516	-0.0146341	0.0263158	-0.0921053	0.160305	0.142077	-0.0127389
0.15	0.0895522	-0.0449102	-0.0430686	0.0940171	-0.109356	0.0152091	-0.0884956	0.0195122	-0.0157895	0.0526316	0.175573	0.10929	0.022293
0.108333	-0.0597015	-0.0479042	-0.0242261	-0.042735	-0.168894	-0.0209125	-0.0897598	0.0487805	0.178947	-0.0526316	0.129771	0.0874317	-0.00955414
0.183333	-0.0746269	-0.0464072	-0.0296097	-0.0854701	-0.102066	-0.0152091	-0.0922882	0.0878049	0.1	0.151316	0.110687	0.371585	-0.0382166
0.208333	0.0447761	-0.0344311	-0.0343203	0.128205	-0.0984204	0.0380228	-0.0884956	0	0.0842105	0.131579	0.236641	0.196721	-0.0286624
0.108333	0.0746269	-0.0494012	-0.0316285	0.00854701	-0.0923451	0.0190114	-0.0530973	-0.0195122	0.0105263	0.00657895	0.129771	0.174863	-0.0159236
0.175	0.119403	-0.0658683	-0.0215343	-0.0769231	-0.0595383	0.0095057	-0.0328698	0.0243902	-0.00526316	-0.0592105	0.217557	0.191257	-0.00955414
0.141667	0	-0.0494012	-0.0222073	-0.0598291	-0.0741191	0.0437262	-0.091024	-0.0585366	0	-0.151316	0.148855	0.306011	0.00318471
0.0833333	0.104478	-0.0658683	-0.0201884	-0.017094	-0.0595383	0.0304183	-0.0733249	0	0.0789474	0.171053	0.240458	0.245902	-0.00636943
0.191667	0	-0.0808383	-0.0242261	0.0512821	-0.0133657	-0.0209125	-0.0493047	0.0926829	0.0157895	0.0855263	0.148855	0.349727	0
0.166667	0.0895522	-0.0913174	-0.0114401	-0.0512821	-0.0510328	-0.026616	-0.0771176	0.0146341	0.0315789	-0.0789474	0.133588	0.218579	-0.0286624
0.166667	0.0447761	-0.0898204	-0.0235532	-0.00854701	-0.0279465	-0.0190114	-0.068268	0.00487805	-0.0157895	0.0263158	0.156489	0.240437	-0.0541401
0.108333	0.0298507	-0.0898204	-0.00471063	0.017094	-0.0801944	-0.00760456	-0.0733249	0.0487805	0.0736842	0.0197368	0.19084	0.180328	-0.0541401
0.233333	0.134328	-0.0838323	-0.00942126	-0.00854701	-0.0862697	0.0494297	-0.0733249	0.0243902	0.110526	-0.0328947	0.179389	0.284153	-0.0254777
0.166667	0.0298507	-0.0958084	-0.013459	0.128205	-0.0838396	0.0703422	-0.0493047	0.0195122	0.0263158	-0.0986842	0.183206	0.114754	-0.00955414
0.0833333	0.0597015	-0.113772	-0.0296097	0.017094	-0.239368	0.155894	-0.034134	0.0390244	-0.0315789	-0.131579	-0.0458015	0.174863	-0.0191083
0.0833333	0	-0.0913174	-0.0444145	0.196581	-0.18712	0.169202	-0.045512	0.0146341	0.0368421	-0.125	-0.167939	0.180328	-0.0477707
-0.241667	0.0298507	-0.209581	-0.137954	0.350427	-0.221142	0.112167	-0.0379267	-0.0146341	0.0578947	-0.203947	0.0916031	0.20765	-0.0191083
0.0833333	0.0597015	-0.0239521	0.0423957	0.57265	-0.202916	0.226236	-0.410872	-0.258537	-0.105263	0.0263158	0.244275	-0.0163934	-0.143312
0.191667	0	-0.0374251	0.00269179	1.05128	-0.170109	0.336502	-0.222503	-0.0682927	0.278947	-0.0526316	0.270992	-0.0382514	-0.117834
0.233333	0.0597015	-0.0538922	-0.026245	1.23077	-0.153098	0.475285	-0.216182	-0.097561	0.663158	0.0328947	0.354962	0.0163934	-0.130573
0.258333	-0.104478	-0.0404192	-0.0450875	1.47863	-0.0874848	0.471483	-0.173198	-0.0097561	1.29474	0.322368	0.396947	0.355191	-0.121019
0.275	0.0149254	-0.0643713	-0.0343203	1.82906	-0.0789793	0.538023	-0.131479	-0.0439024	2.14737	0.638158	0.557252	0.387978	-0.0159236
0.291667	0.104478	-0.0628743	0.06393	2.12821	-0.0522479	0.585551	-0.120101	-0.0146341	2.81053	0.828947	0.568702	0.584699	-0.0350318
0.308333	-0.0298507	-0.0404192	0.120458	2.05128	-0.0291616	0.697719	-0.123894	-0.0682927	3.86316	0.960526	0.59542	0.688525	-0.0414013
0.325	-0.0298507	-0.0149701	0.138627	2.17949	0.0376671	0.771863	-0.111252	-0.0536585	4.35789	1.48684	0.530534	0.704918	-0.0828025
0.466667	-0.134328	0.011976	0.181023	1.91453	0.125152	0.876426	-0.10493	-0.0731707	5.28947	1.50658	0.572519	1.05464	-0.0254777
0.45	-0.0895522	0.0553892	0.233513	2.09402	0.0947752	0.931559	0.00884956	0.0634146	6.08947	1.90789	0.564885	1.14754	0.00636943
0.366667	-0.0149254	0.0778443	0.223419	1.99145	0.126367	0.971483	0.216182	-0.0341463	6.41579	2.23026	0.503817	1.25137	0.0191083
0.383333	0	0.0778443	0.228129	2.15385	0.166464	0.984791	0.316056	0.097561	6.12105	2.23684	0.5	1.26776	0.00636943
0.45	0.0895522	0.0763473	0.257066	1.93162	0.185905	1.10456	0.465234	0.15122	5.94211	2.40132	0.553435	1.38798	0.0764331
0.466667	-0.134328	0.0928144	0.320996	1.78632	0.218712	1.17871	0.614412	0.190244	6.19474	2.38158	0.545802	1.34973	0.0859873
0.566667	-0.104478	0.106287	0.399731	1.76923	0.221142	1.28707	0.771176	0.321951	6.41579	2.72368	0.614504	1.46995	0.0509554
0.566667	-0.0298507	0.0958084	0.469044	1.77778	0.283111	1.34411	1.04172	0.404878	6.91579	2.71053	0.549618	1.55738	0.111465
0.6	-0.0597015	0.0973054	0.526918	1.28205	0.331713	1.49049	1.16941	0.463415	6.73158	2.81579	0.717557	1.39344	0.0636943
0.55	0.0597015	0.118263	0.553163	1.4188	0.122722	1.60646	1.30594	0.541463	7.19474	2.78947	0.561069	1.3388	0.0254777
0.608333	0.0895522	0.121257	0.588829	1.40171	0.346294	1.62167	1.23894	0.692683	6.78421	2.76974	0.984733	1.36066	0.0700637
0.225	0.0597015	0.0224551	0.56393	1.34188	0.335358	1.55513	1.35651	0.829268	7.12105	2.59868	1.28626	1.3388	0.0573248
[truncated: 626 more rows]
