# Supplementary material for: Sensory experience controls dendritic structure and behavior by distinct pathways involving degenerins
Source: eLife. 2025 Jan 10;14:e83973. doi: 10.7554/eLife.83973 (PMC11756856; doi:10.7554/eLife.83973)
Supplement: Figure 7—figure supplement 1—source data 1. [file elife-83973-fig7-figsupp1-data1.xlsx]

## Sheet: Sheet1
Agar contact	Opposing side		paired t test
2.96853	8.89587		0.0315564
4.96491	8.14388
6.9678	11.4449
7.24314	4.40467
6.98765	15.2973
7.66344	13.4762
6.12365	8.41984
8.9557	17.3452
11.754	18.0049
8.84375	15.3566
5.24074	24.7962
9.91243	16.8641
3.02674	10.0177
6.27726	4.36224
6.51823	7.51327
9.34175	8.11664
8.24272	17.0681
7.59392	6.62883
5.37342	8.41471
3.8023	7.59004
4.61664	3.28433
17.1841	13.1628
7.81288	5.15397
7.32686	4.78041
8.69982	9.96869
4.35385	5.39048
8.4101	7.90227
8.23273	9.70578
6.24921	5.6412
11.5623	5.4845
12.7743	5.97887
7.39179	5.62929
10.4205	9.83398
6.19708	4.28788
7.54667	6.95463
5.94084	6.00965
