# Supplementary figures and images for: Sensory experience controls dendritic structure and behavior by distinct pathways involving degenerins
Source: eLife journal article supplement (doi:10.7554/elife.83973), 2025-01-10

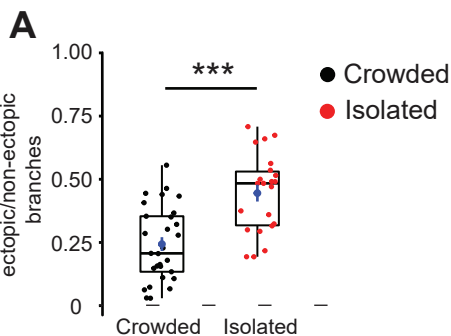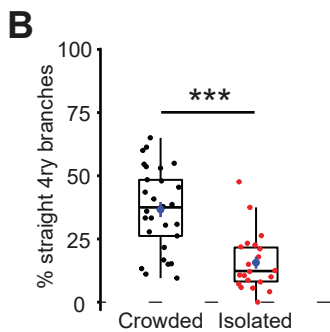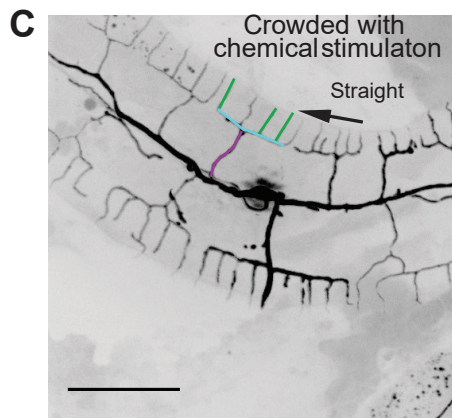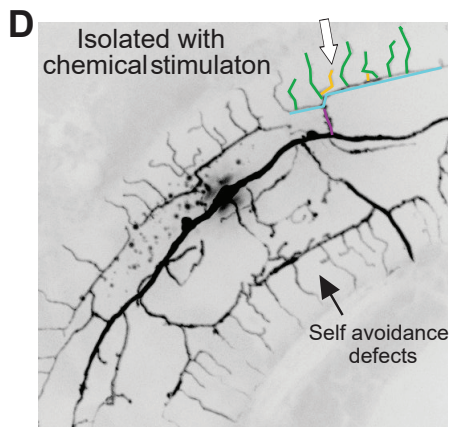

Supplement: supp [file elife-83973-supp-v1.zip]

**A**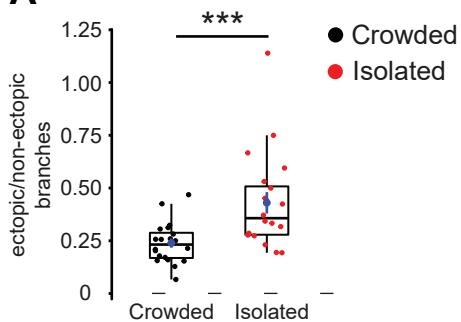**C**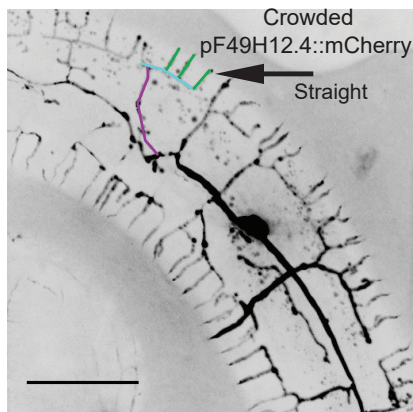**B**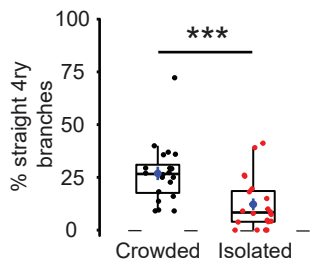**D**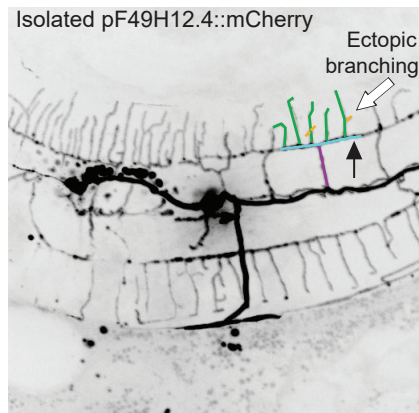

Supplement: supp [file elife-83973-supp-v1.zip]

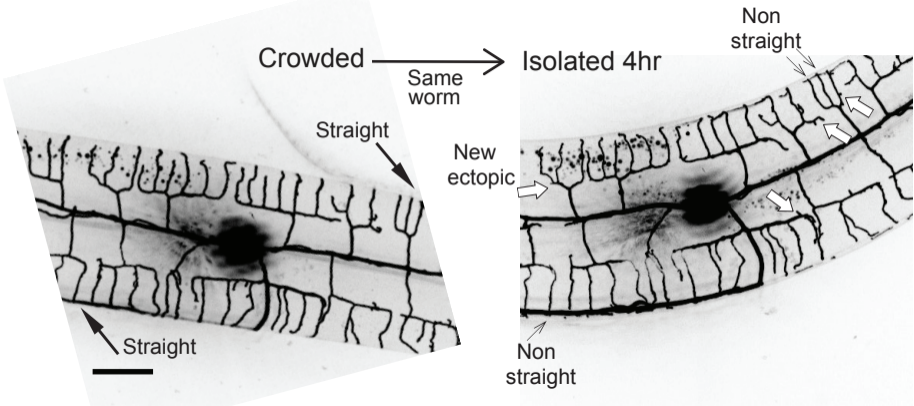

Supplement: supp [file elife-83973-supp-v1.zip]

**A**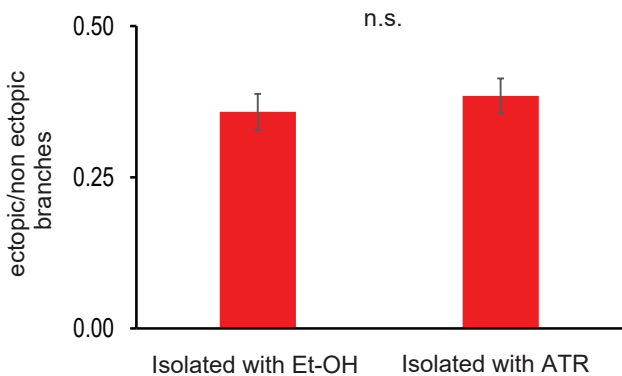**B**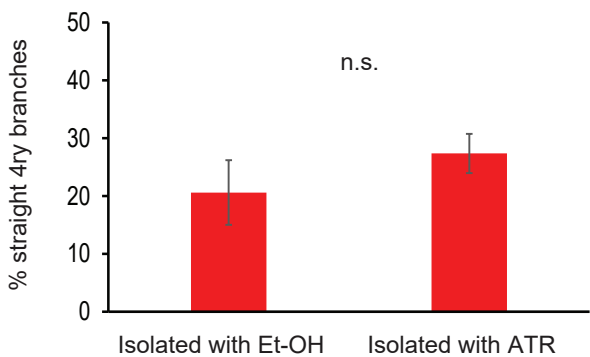**C**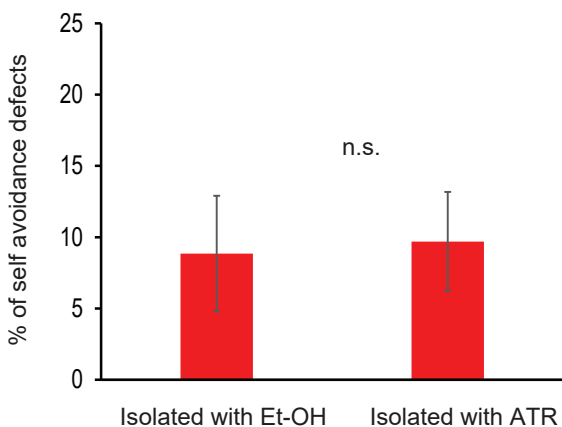

Supplement: supp [file elife-83973-supp-v1.zip]

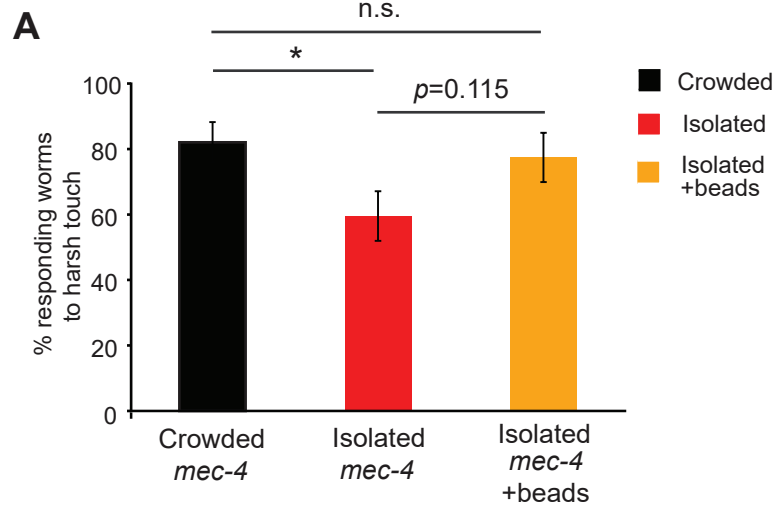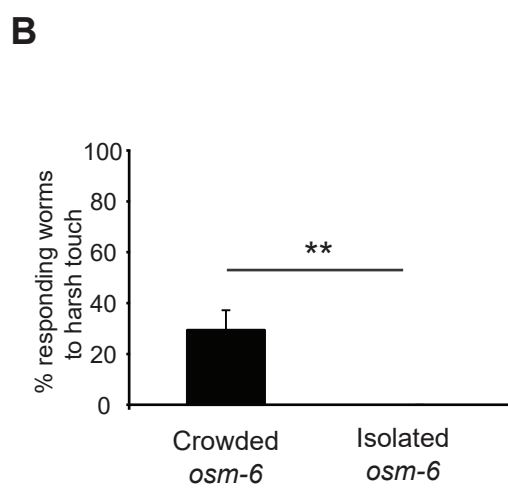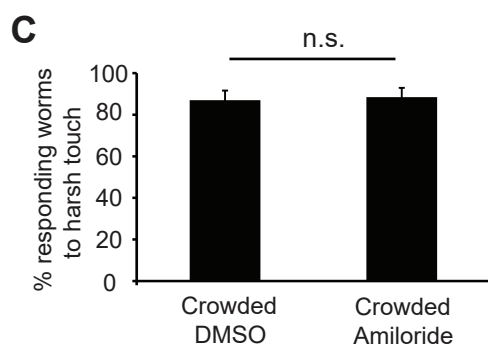

Supplement: supp [file elife-83973-supp-v1.zip]

**A**

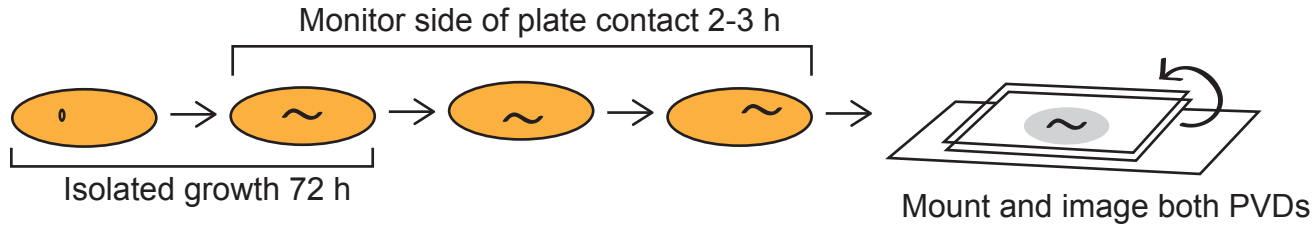

**B**

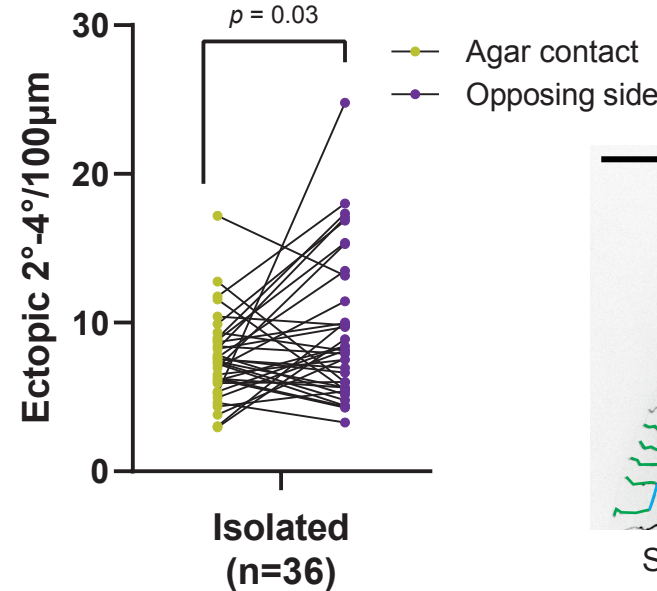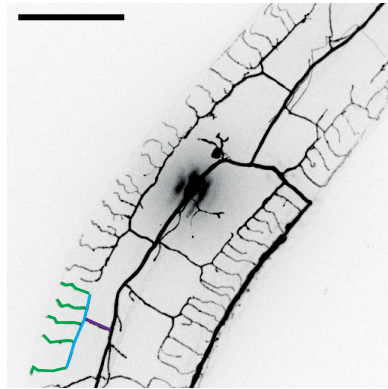

Side of plate contact

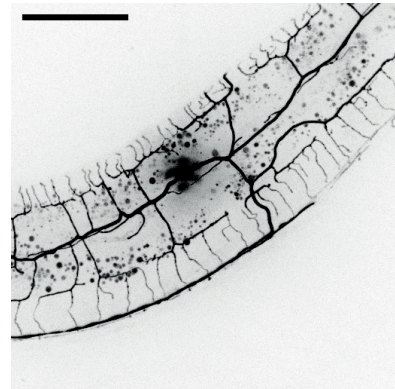

Opposing side

Supplement: supp [file elife-83973-supp-v1.zip]

**A**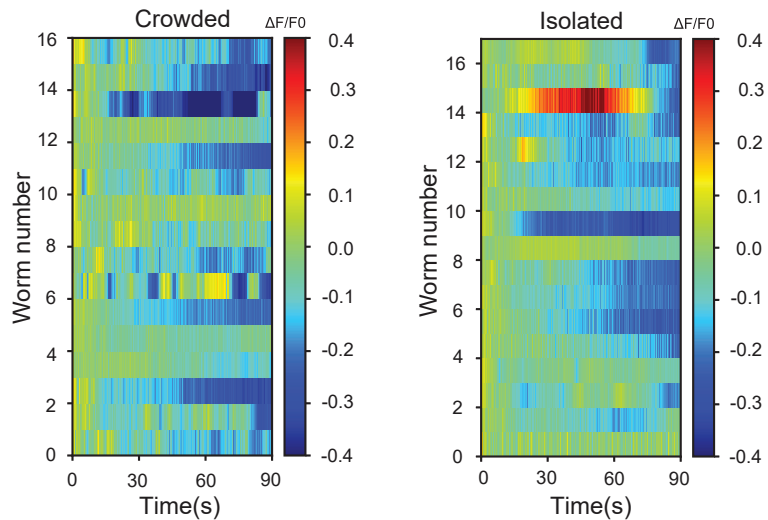**B**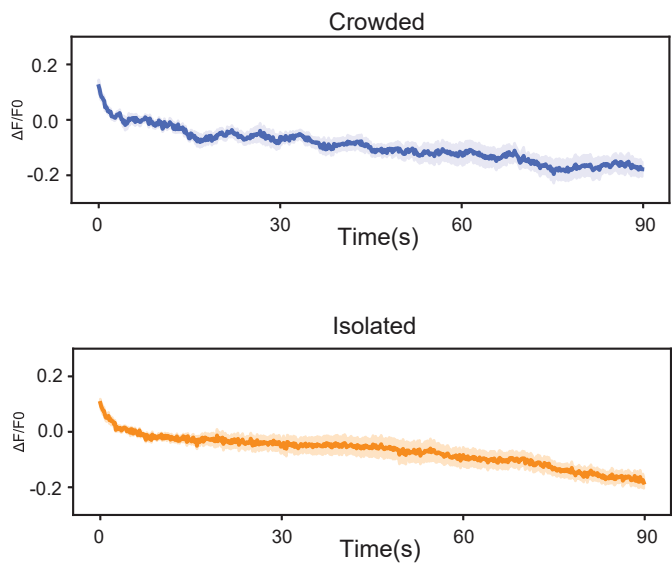**C**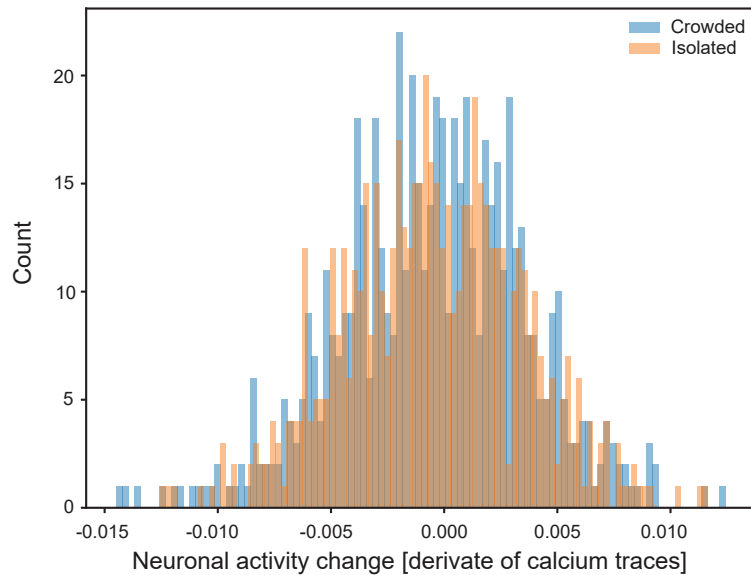

Supplement: supp [file elife-83973-supp-v1.zip]

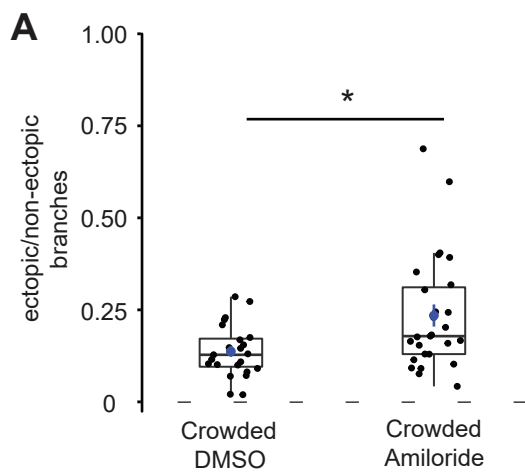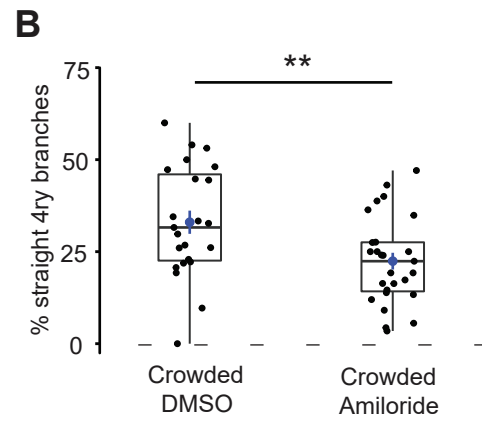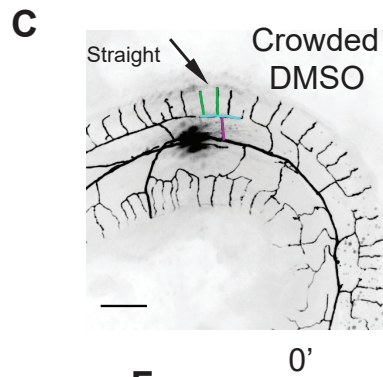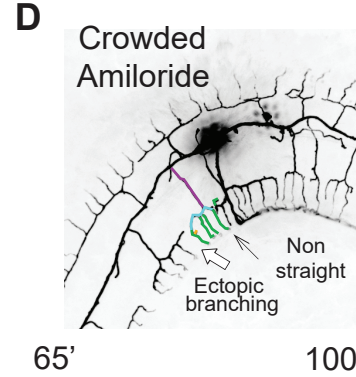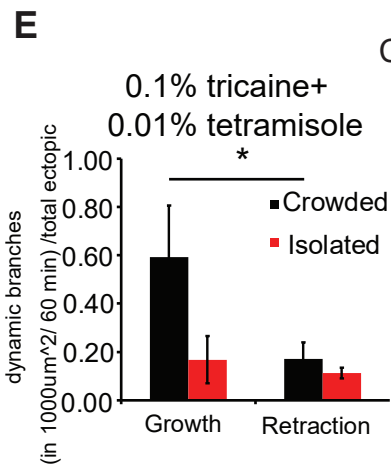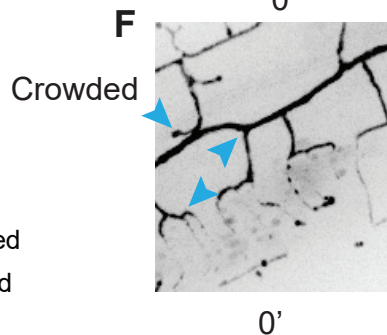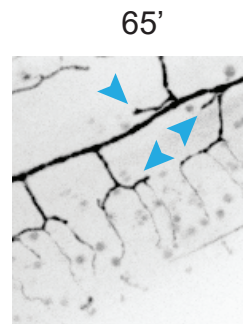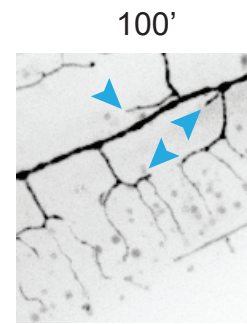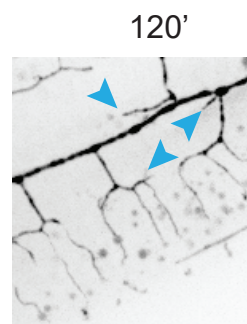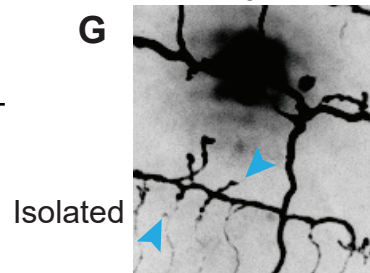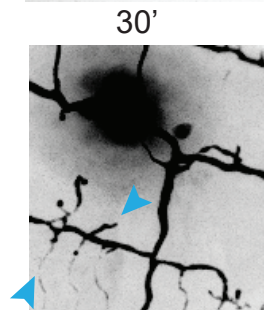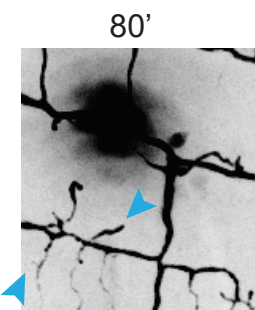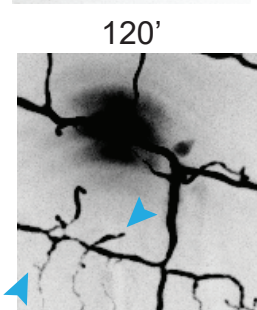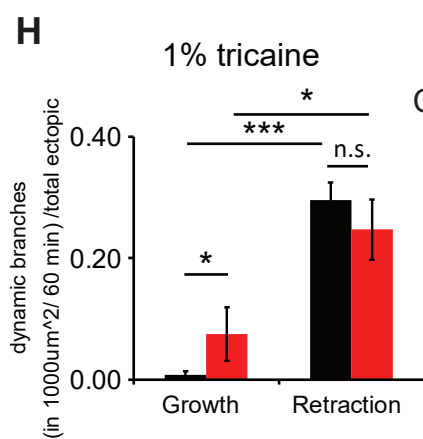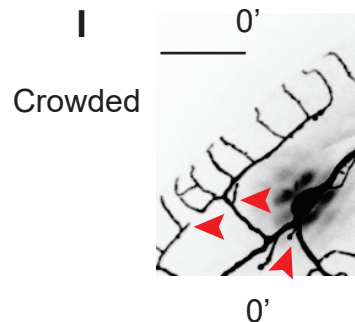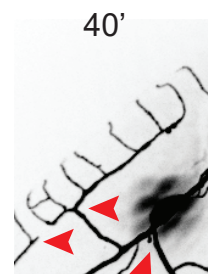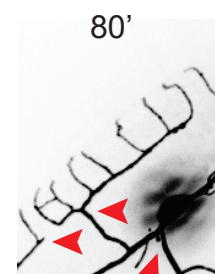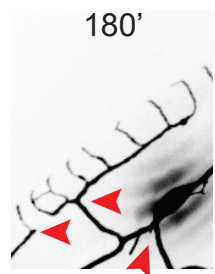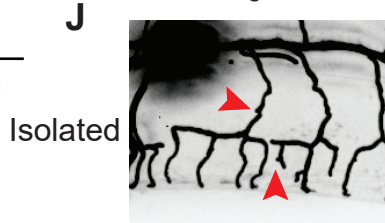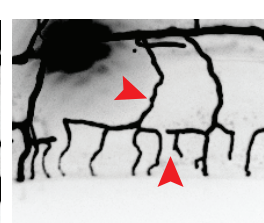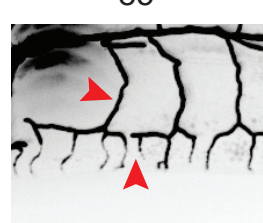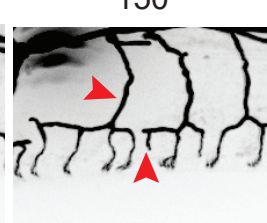

Supplement: supp [file elife-83973-supp-v1.zip]

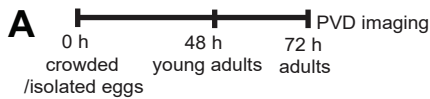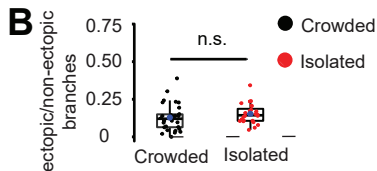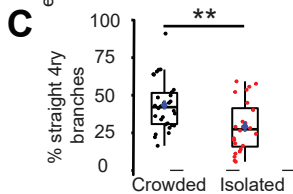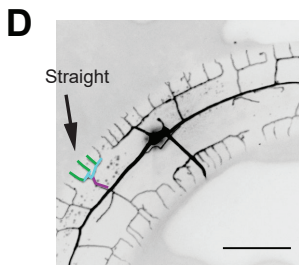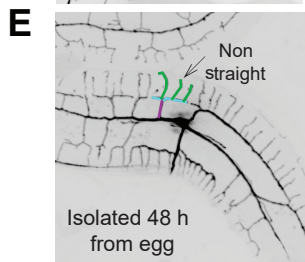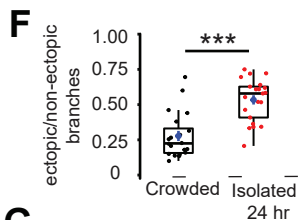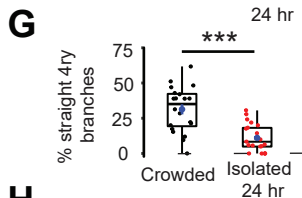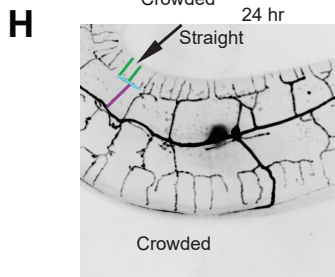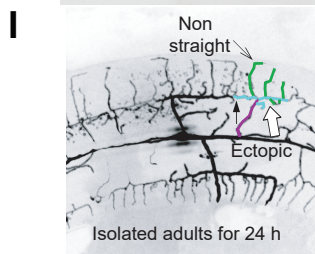

Supplement: supp [file elife-83973-supp-v1.zip]

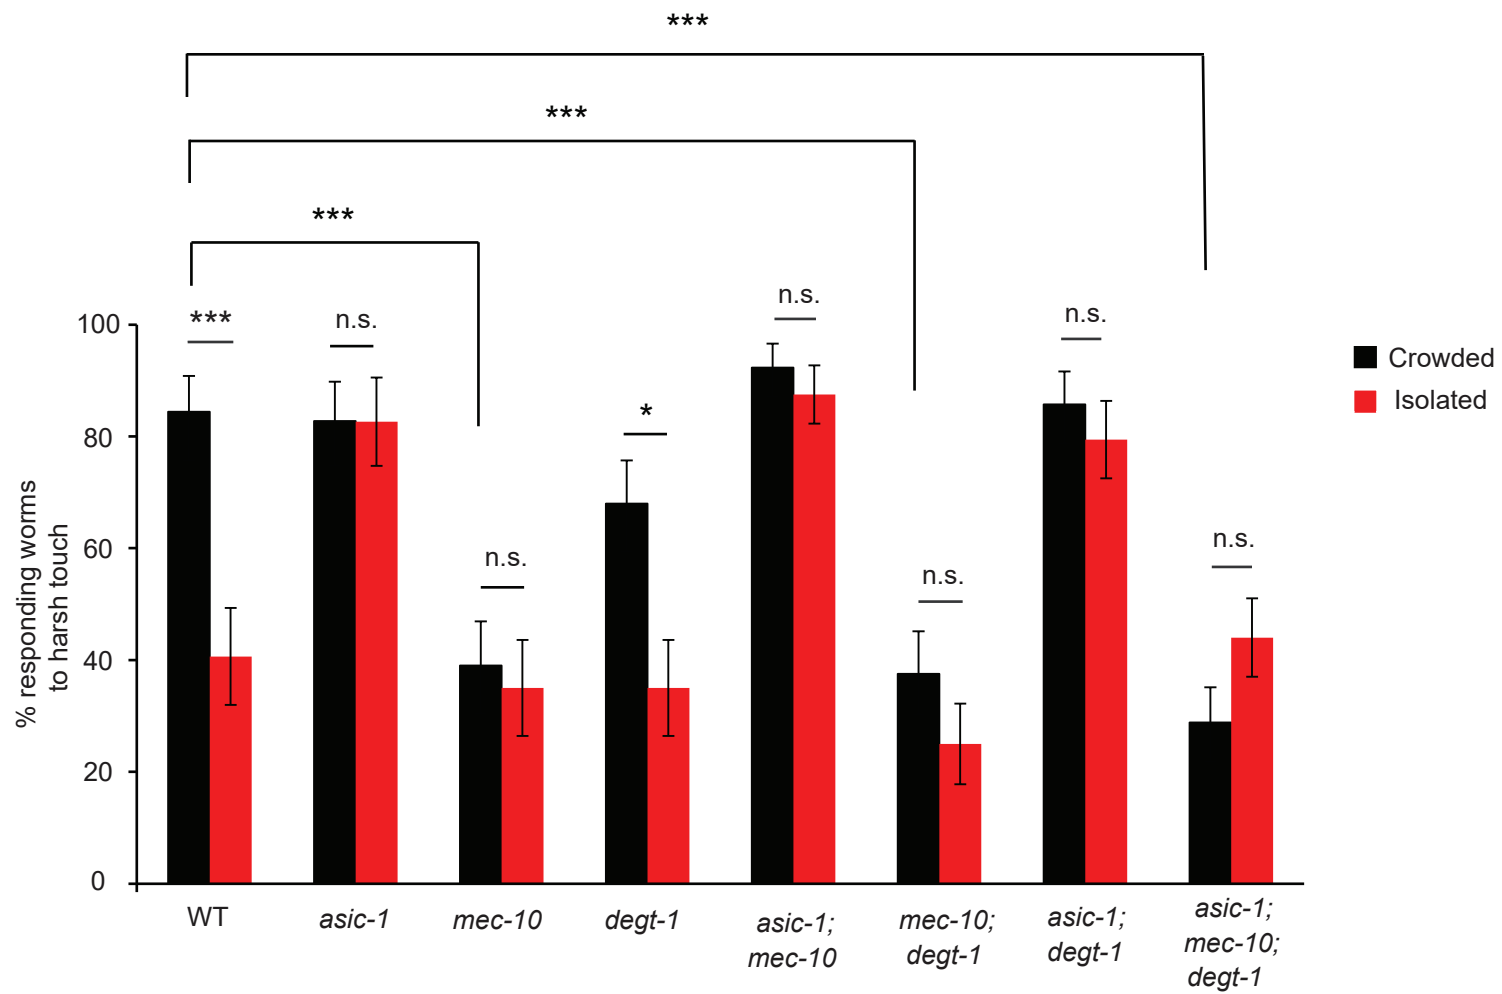

Supplement: supp [file elife-83973-supp-v1.zip]

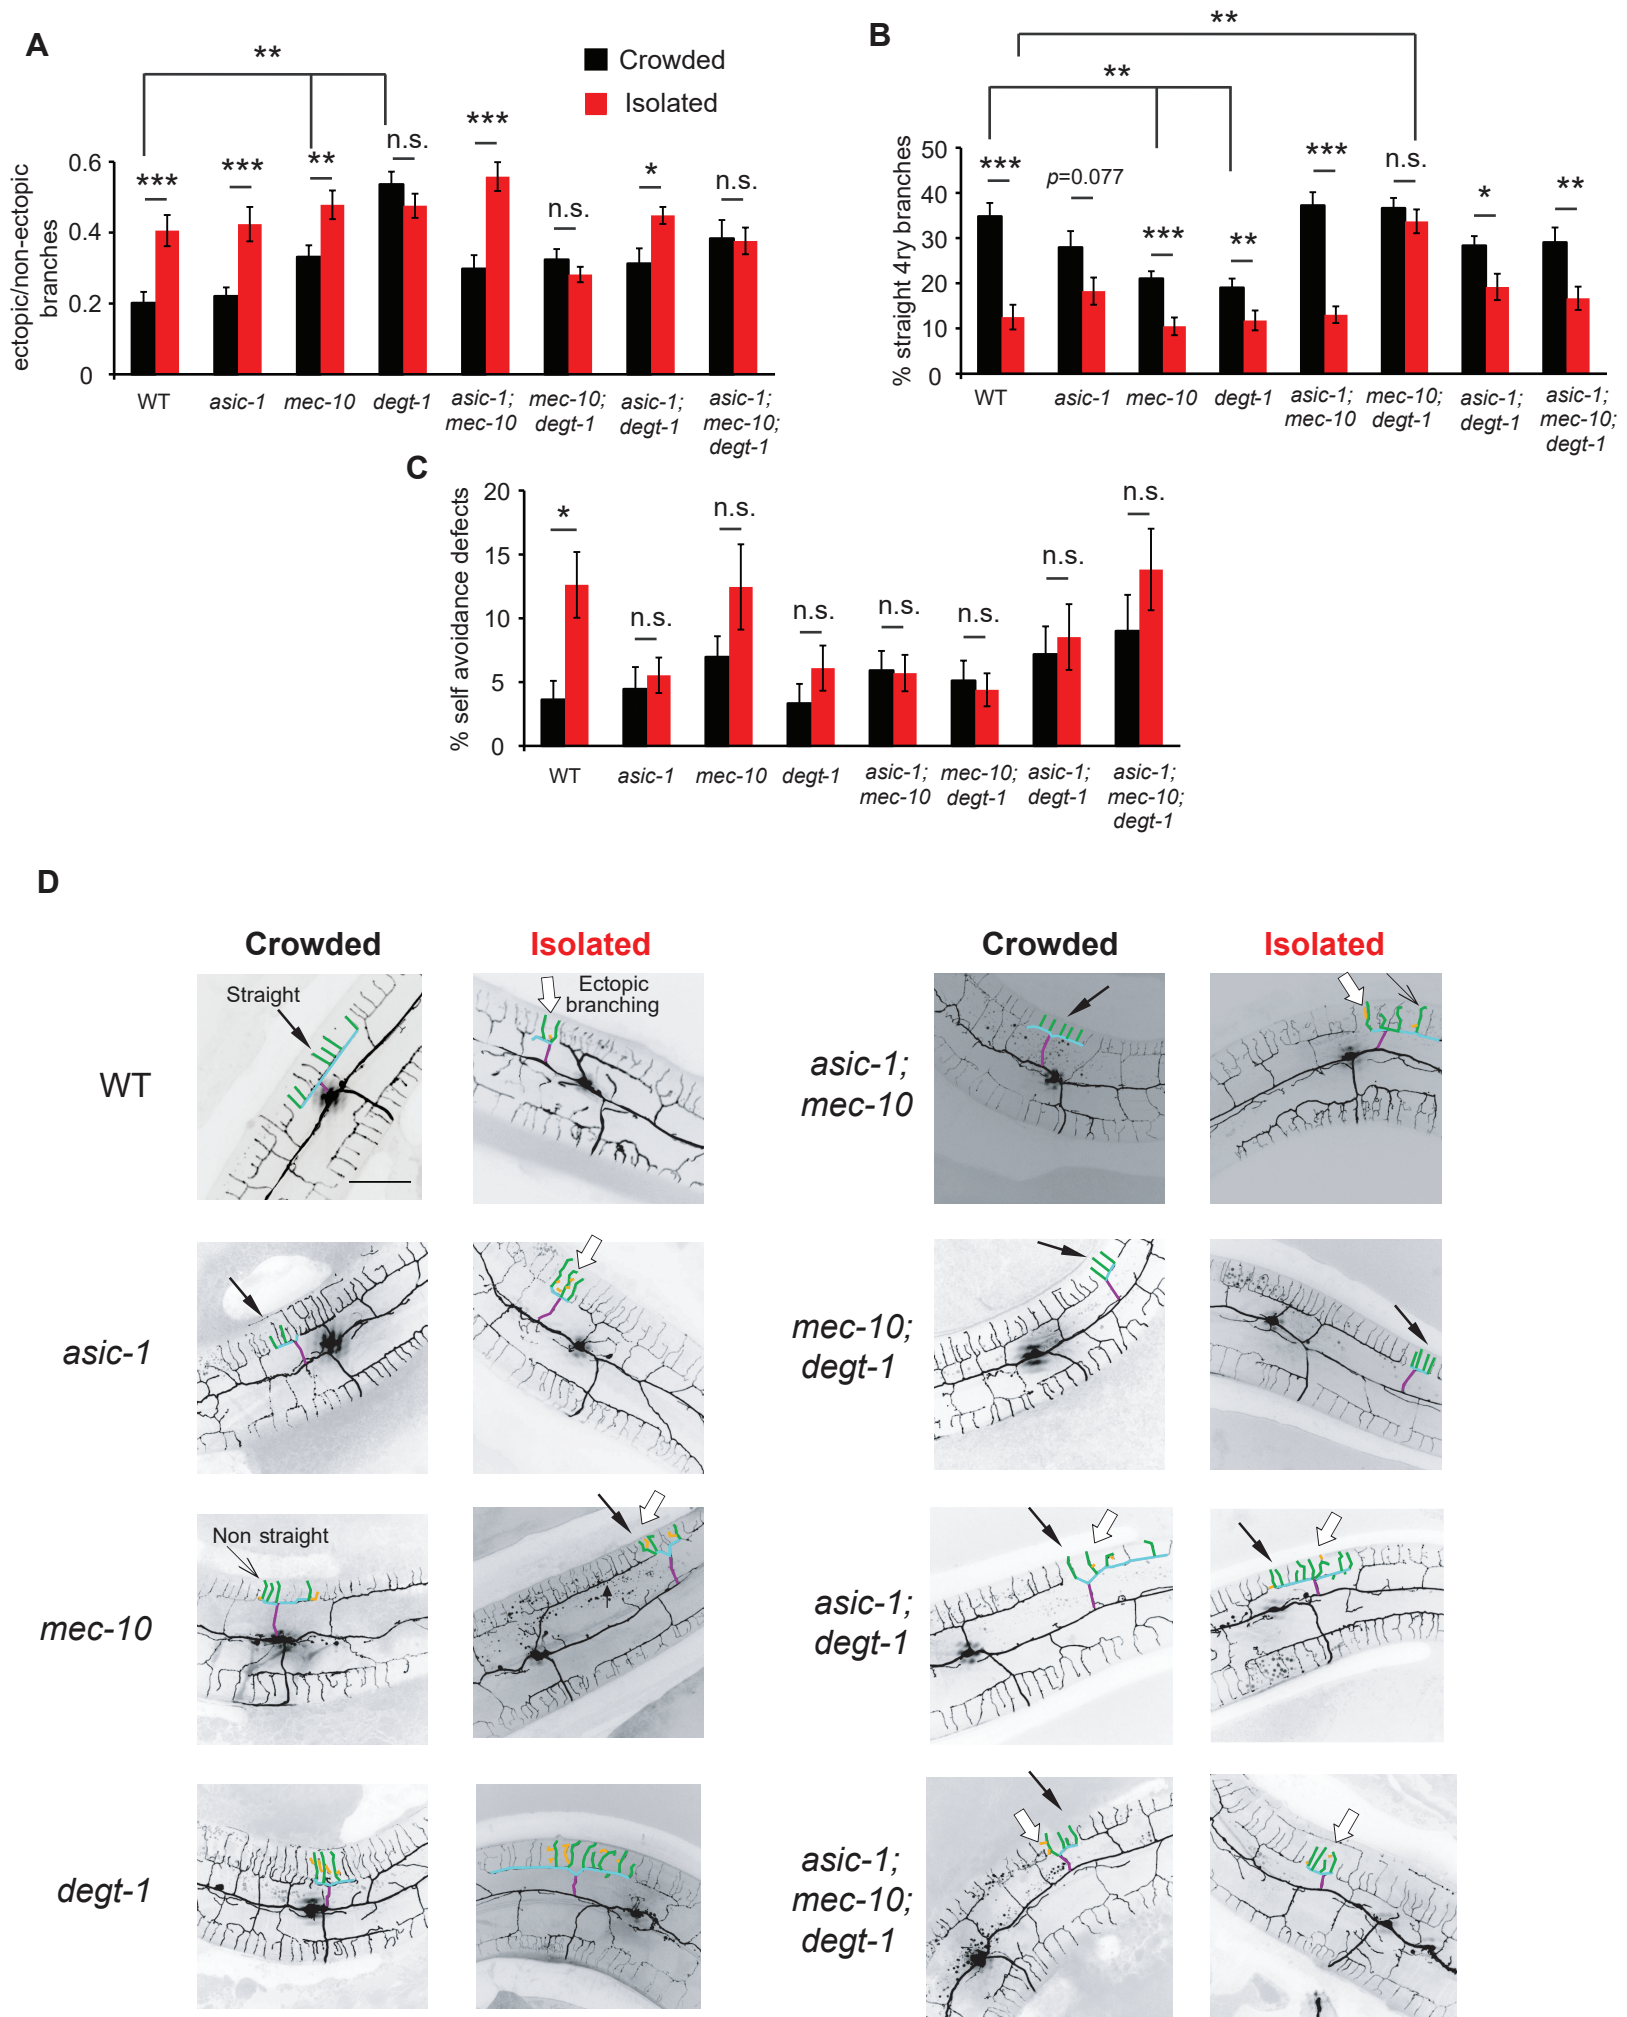

Supplement: supp [file elife-83973-supp-v1.zip]

**A**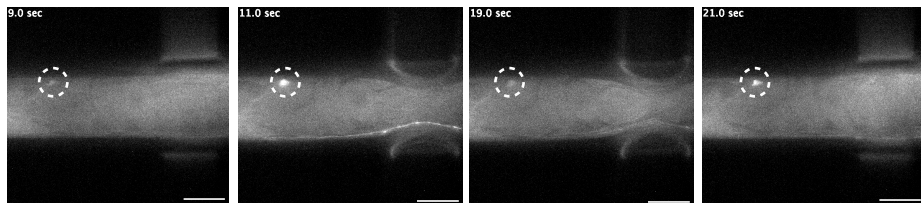**B**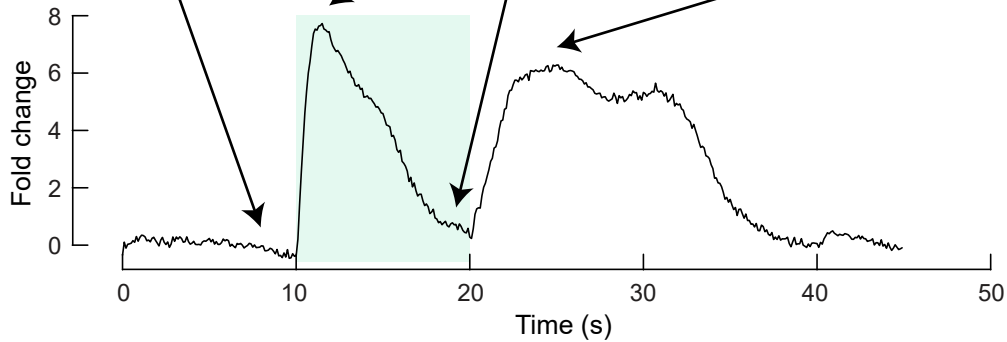

Supplement: supp [file elife-83973-supp-v1.zip]

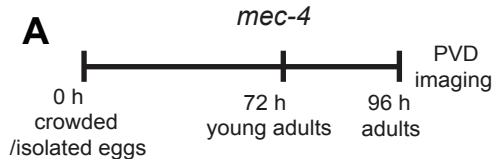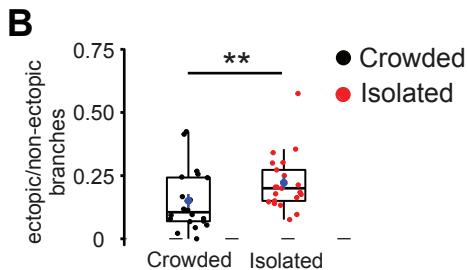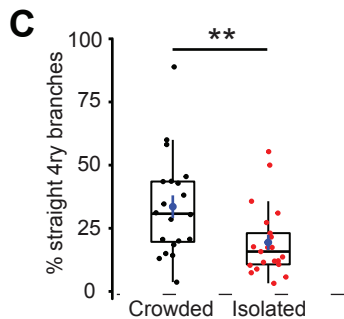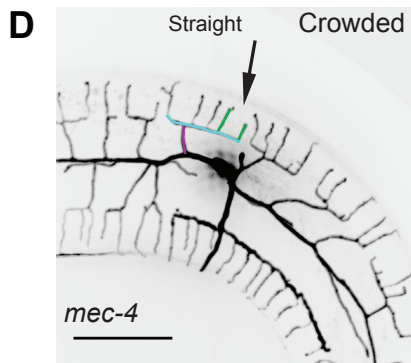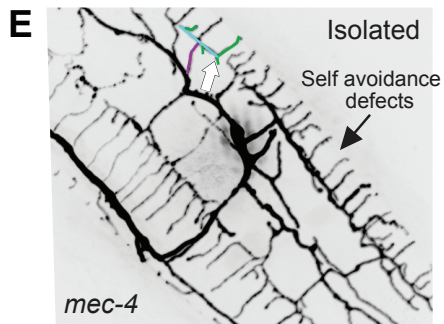

Supplement: supp [file elife-83973-supp-v1.zip]

**A**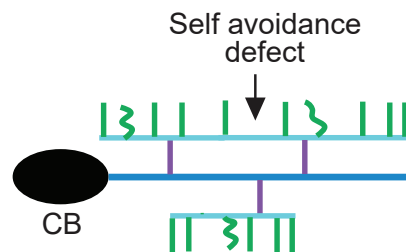**B**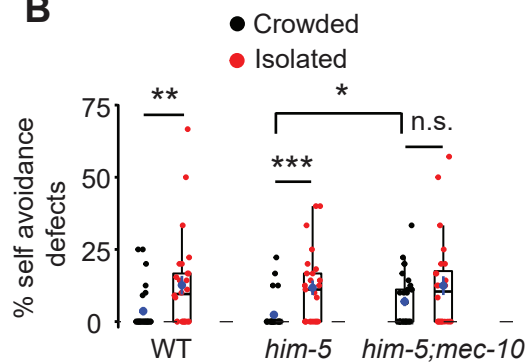**C**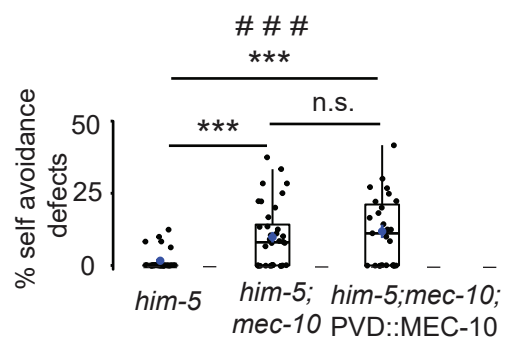**D**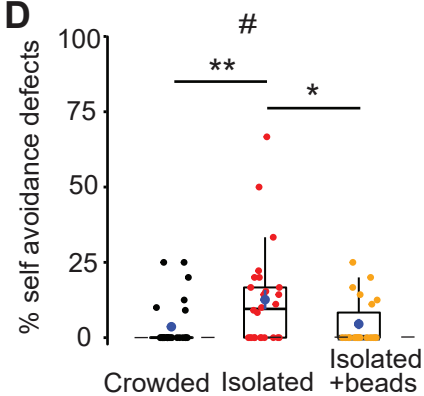**E**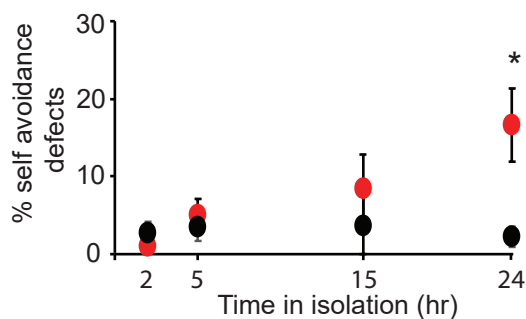**F**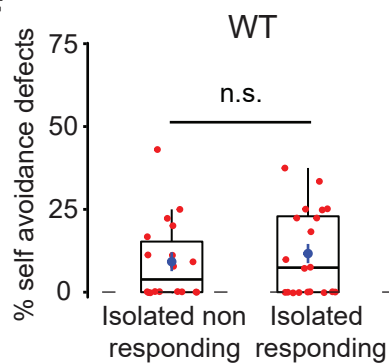**G**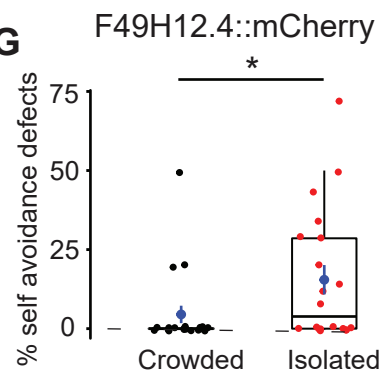**H**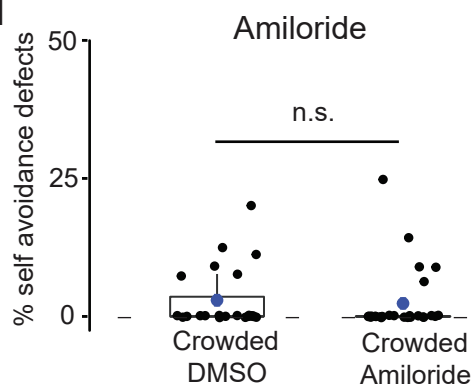**I**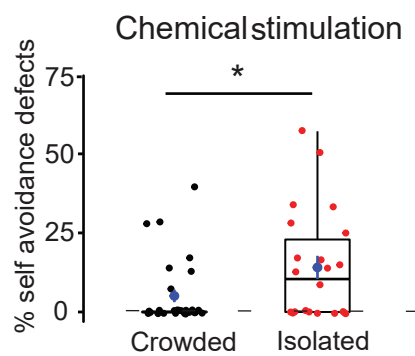**J**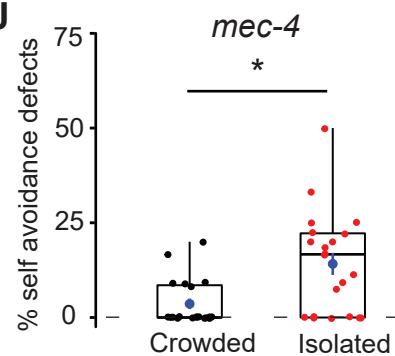**K**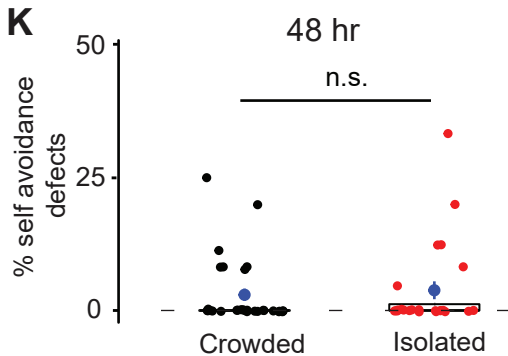**L**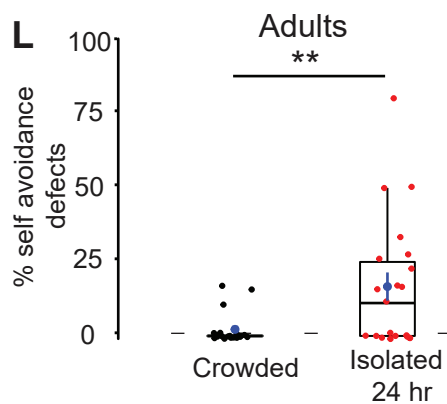

Supplement: supp [file elife-83973-supp-v1.zip]
